# Supplementary material for: Drosophila PSI controls circadian period and the phase of circadian behavior under temperature cycle via tim splicing
Source: eLife journal article supplement (doi:10.7554/elife.50063), 2019-11-08
Supplement: supp [file elife-50063-supp-v1.zip]

Archive with 31 entries (31 files):
- elife_poa_e50063_Figure_4_figure_supplement_1_source_data_1.xlsx
- elife_poa_e50063_Figure_2_figure_supplement_2_source_data_2.xlsx
- elife_poa_e50063_Figure_3_figure_supplement_1_source_data_2.xlsx
- elife_poa_e50063_Figure_3_source_data_2.xlsx
- elife_poa_e50063_Supplementary_file_1.xlsx
- elife_poa_e50063_Transparent_Reporting_File.pdf
- elife_poa_e50063_Figure_3_figure_supplement_3_source_data_2.xlsx
- elife_poa_e50063_Figure_1_source_data_1.xlsx
- elife_poa_e50063_Figure_4_figure_supplement_1_source_data_2.xlsx
- elife_poa_e50063_Figure_3_figure_supplement_3_source_data_1.xlsx
- elife_poa_e50063_Figure_3_figure_supplement_3.jpg
- elife_poa_e50063_Figure_2_source_data_1.xlsx
- elife_poa_e50063_Figure_2_figure_supplement_2_source_data_1.xlsx
- elife_poa_e50063_Figure_3_figure_supplement_1.jpg
- elife_poa_e50063_Figure_3_figure_supplement_1_source_data_1.xlsx
- elife_poa_e50063_Figure_5_source_data_2.xlsx
- elife_poa_e50063_Figure_3_figure_supplement_2_source_data_1.xlsx
- elife_poa_e50063_Figure_4_figure_supplement_1.jpg
- elife_poa_e50063_Figure_2_figure_supplement_1_source_data_1.xlsx
- elife_poa_e50063_Figure_4_source_data_1.xlsx
- elife_poa_e50063_Figure_3_source_data_1.xlsx
- elife_poa_e50063_Figure_2_figure_supplement_1_source_data_2.xlsx
- elife_poa_e50063_Figure_2_figure_supplement_1.jpg
- elife_poa_e50063_Figure_2_figure_supplement_2.jpg
- elife_poa_e50063_Figure_2_source_data_2.xlsx
- elife_poa_e50063_Figure_3_figure_supplement_2.jpg
- elife_poa_e50063_Figure_2_figure_supplement_2_source_data_3.xlsx
- elife_poa_e50063_Figure_4_source_data_2.xlsx
- elife_poa_e50063_Figure_5_source_data_1.xlsx
- elife_poa_e50063_Figure_1_source_data_2.xlsx
- elife_poa_e50063_Figure_3_figure_supplement_2_source_data_2.xlsx
