# Supplementary material for: Drosophila PSI controls circadian period and the phase of circadian behavior under temperature cycle via tim splicing
Source: eLife journal article supplement (doi:10.7554/elife.50063), 2019-11-08
Supplement: supp [file elife-50063-supp-v1.zip › elife_poa_e50063_Figure_1_source_data_1.xlsx]

## Sheet: Figure 1B
Genotype	Rhythmic (R)/Arrhythmic (A)	Period	Power	Width
Each row represents an individual fly
PD2/+	A	25	19.5	2
PD2/+	R	25.1	34.3	2.5
PD2/+	A	24.2	2.6	0.5
PD2/+	R	25.2	64.6	3.5
PD2/+	R	25.4	38.2	4
PD2/+	R	24.8	77.7	3
PD2/+	R	24.7	79.9	3.5
PD2/+	R	25.1	57.3	3.5
PD2/+	R	25.2	58.6	3.5
PD2/+	R	24.9	38.6	2
PD2/+	R	25.1	66.7	3.5
PD2/+	R	25.2	36	4.5
PD2/+	R	24.7	31.8	3.5
PD2/+	R	24.9	65	3
PD2/+	R	25.1	70.7	4.5
PD2/+	R	24.8	53	3
PD2/+	R	24.4	57.7	3
PD2/+	R	24.4	56.5	3
PD2/+	R	24.4	80.4	3
PD2/+	A	12.5	-9.2	0
PD2/+	R	24.3	78.4	3
PD2/+	R	24.4	64.8	3
PD2/+	R	24.8	90.5	4
PD2/+	R	24.3	82	3
PD2/+	R	24.4	67.7	3
PD2/+	A	12.3	42.1	1
PD2/+	R	24.7	52.7	3.5
PD2/+	R	24.9	78.2	4
PD2/+	R	24.6	90.3	3.5
PD2/+	R	24.2	29.3	1.5
PD2/+	R	24.9	64.3	3
PD2/+	R	24.5	54	3
40D-UAS/PD2	R	25.5	85.2	4.5
40D-UAS/PD2	R	25.7	78	4.5
40D-UAS/PD2	R	25.8	69.4	5
40D-UAS/PD2	R	25.4	78.5	4
40D-UAS/PD2	R	25.4	61.7	4
40D-UAS/PD2	R	25.2	46.8	4.5
40D-UAS/PD2	R	25.2	34.8	3.5
40D-UAS/PD2	R	25.6	65.5	4.5
40D-UAS/PD2	R	26.1	70.8	4.5
40D-UAS/PD2	R	26	39.9	4
40D-UAS/PD2	R	25.1	49.5	3.5
40D-UAS/PD2	R	25.4	37.3	4
40D-UAS/PD2	R	25.5	61.1	5
40D-UAS/PD2	R	25.7	49.7	4.5
40D-UAS/PD2	R	25.6	56.7	4.5
40D-UAS/PD2	R	25.6	58.8	4.5
40D-UAS/PD2	R	25.1	65.3	3.5
40D-UAS/PD2	R	25	50.9	3
40D-UAS/PD2	R	25.2	76.1	4.5
40D-UAS/PD2	R	25.6	71.7	4.5
40D-UAS/PD2	R	25.4	45.1	4
40D-UAS/PD2	R	25.2	47.3	3.5
40D-UAS/PD2	R	25.3	80.8	5
40D-UAS/PD2	R	24.7	72	3.5
40D-UAS/PD2	R	24.9	51.8	4
40D-UAS/PD2	R	25.4	55.2	3
40D-UAS/PD2	R	26	53.2	5
40D-UAS/PD2	R	25.4	34.4	3
40D-UAS/PD2	R	24.2	35.2	2.5
40D-UAS/PD2	R	24.7	20.7	2.5
40D-UAS/PD2	R	25.2	29.2	3.5
40D-UAS/PD2	R	25.4	60.9	4
