# Supplementary material for: Drosophila PSI controls circadian period and the phase of circadian behavior under temperature cycle via tim splicing
Source: eLife journal article supplement (doi:10.7554/elife.50063), 2019-11-08
Supplement: supp [file elife-50063-supp-v1.zip › elife_poa_e50063_Figure_1_source_data_2.xlsx]

## Sheet: Figure 1
Figure 1A
Genotype	Mean	SEM	Number of crosses
Left Panel (Black bars)
w1118	24.07	0.05609	20
TRiP lines/+	23.79	0.04743	17
VDRC lines/+	24.11	0.02957	46
40D KK VDRC lines/+	24.08	0.02665	20
Middle Panel (Blue bars)
TD2/+	24.86	0.03075	35
TRiP lines xTD2	24.69	0.03236	151
VDRC lines x TD2	24.89	0.02714	340
40D KK VDRC lines x TD2	25.06	0.07778	61
Right Panel (Magenta bars)
PD2/+	24.86	0.03604	36
TRiP lines x PD2	24.56	0.03422	176
VDRC lines x PD2	25.1	0.03203	448
40D KK VDRC lines x PD2	25.68	0.09782	69
One-way ANOVA followed by:
Left Panel (Black bars)
Tukey's multiple comparisons test	Mean Diff.	95.00% CI of diff.	Significant?	Summary	Adjusted P Value
TRiP lines/+ vs. VDRC lines/+	-0.3204	-0.4674 to -0.1734	Yes	****	<0.0001
TRiP lines/+ vs. 40D KK VDRC lines/+	-0.2844	-0.4552 to -0.1136	Yes	***	0.0002
TRiP lines/+ vs. w1118	-0.2769	-0.4477 to -0.1061	Yes	***	0.0003
VDRC lines/+ vs. 40D KK VDRC lines/+	0.03598	-0.1027 to 0.1747	No	ns	0.9053
VDRC lines/+ vs. w1118	0.04347	-0.09523 to 0.1822	No	ns	0.8454
40D KK VDRC lines/+ vs. w1118	0.007488	-0.1563 to 0.1712	No	ns	0.9994
Middle Panel (Blue bars)
Tukey's multiple comparisons test	Mean Diff.	95.00% CI of diff.	Significant?	Summary	Adjusted P Value
TRiP lines xTD2 vs. VDRC lines x TD2	-0.1969	-0.3167 to -0.07704	Yes	***	0.0002
TRiP lines xTD2 vs. 40D KK VDRC lines x TD2	-0.3761	-0.5621 to -0.1902	Yes	****	<0.0001
TRiP lines xTD2 vs. TD2/+	-0.1717	-0.4016 to 0.05825	No	ns	0.2192
VDRC lines x TD2 vs. 40D KK VDRC lines x TD2	-0.1793	-0.3497 to -0.00886	Yes	*	0.0348
VDRC lines x TD2 vs. TD2/+	0.02523	-0.1923 to 0.2428	No	ns	0.9907
40D KK VDRC lines x TD2 vs. TD2/+	0.2045	-0.05537 to 0.4644	No	ns	0.179
Right Panel (Magenta bars)
Tukey's multiple comparisons test	Mean Diff.	95.00% CI of diff.	Significant?	Summary	Adjusted P Value
TRiP lines x PD2 vs. VDRC lines x PD2	-0.5424	-0.6868 to -0.398	Yes	****	<0.0001
TRiP lines x PD2 vs. 40D KK VDRC lines x PD2	-1.125	-1.356 to -0.8948	Yes	****	<0.0001
TRiP lines x PD2 vs. PD2/+	-0.3025	-0.5994 to -0.005577	Yes	*	0.044
VDRC lines x PD2 vs. 40D KK VDRC lines x PD2	-0.5829	-0.7929 to -0.373	Yes	****	<0.0001
VDRC lines x PD2 vs. PD2/+	0.2399	-0.0413 to 0.5211	No	ns	0.1251
40D KK VDRC lines x PD2 vs. PD2/+	0.8228	0.4891 to 1.157	Yes	****	<0.0001
Figure 1B
Unpaired t test
P value	<0.0001
P value summary	****
Mean ± SEM, n (rhythmic flies) of PD2/+	24.76 ± 0.06325, n=28
Mean ± SEM, n (rhythmic flies) of 40D-UAS/PD2	25.36 ± 0.07026, n=32
Difference between means	0.5951 ± 0.09563
95% confidence interval	0.4037 to 0.7865
