# Supplementary material for: Drosophila PSI controls circadian period and the phase of circadian behavior under temperature cycle via tim splicing
Source: eLife journal article supplement (doi:10.7554/elife.50063), 2019-11-08
Supplement: supp [file elife-50063-supp-v1.zip › elife_poa_e50063_Figure_2_figure_supplement_1_source_data_1.xlsx]

## Sheet: Figure 2-S1
		Psi Relative expression (AU): Values are normalized to the average of all PsiRNAiKK/TD2 timepoints
Time point	Genotype	Experiment 1	Experiment 2	Experiment 3	Experiment 4	Experiment 5	Average	SEM
CT3	TD2/+			1.36374	1.36893	1.28679	1.33982	0.0265566
CT9				1.35723	1.21933	1.20106	1.2592	0.049296
CT15				1.4175	1.13996	1.21554	1.25767	0.0828409
CT21				1.44767	1.32526	1.23831	1.33708	0.0607266
CT3	PsiRNAiKK/+	1.37655	0.948362	1.33738			1.22076	0.13667
CT9		1.30123	0.992744	1.33138			1.20845	0.108205
CT15		1.12679	0.996138	1.3154			1.14611	0.0926683
CT21		1.23387	1.12314	1.45631			1.27111	0.0979658
CT3	PsiRNAiKK/TD2	0.935218	0.971267	0.915437	1.01561	1.01082	0.96967	0.0199178
CT9		0.981267	0.983298	0.945721	1.04702	0.989555	0.989372	0.0163265
CT15		1.03949	0.961656	1.10351	0.88906	0.910827	0.980909	0.040113
CT21		1.04402	1.08378	1.03533	1.04832	1.08879	1.06005	0.0109427
