# Supplementary material for: Drosophila PSI controls circadian period and the phase of circadian behavior under temperature cycle via tim splicing
Source: eLife journal article supplement (doi:10.7554/elife.50063), 2019-11-08
Supplement: supp [file elife-50063-supp-v1.zip › elife_poa_e50063_Figure_2_figure_supplement_1_source_data_2.xlsx]

## Sheet: Figure 2-S1
Figure 2-S1A
	PsiRNAiKK/+			TD2/+			TD2/PsiRNAiKK
	Mean	SEM	N (runs)	Mean	SEM	N (runs)	Mean	SEM	N (runs)
CT 3	1.22076	0.13667	3	1.33982	0.0265566	3	0.96967	0.0199178	5
CT 9	1.20845	0.108205	3	1.2592	0.049296	3	0.989372	0.0163265	5
CT 15	1.14611	0.0926683	3	1.25767	0.0828409	3	0.980909	0.040113	5
CT 21	1.27111	0.0979658	3	1.33708	0.0607266	3	1.06005	0.0109427	5
Two-way ANOVA followed by:
Tukey's multiple comparisons test	Mean Diff.	95.00% CI of diff.	Significant?	Summary	Adjusted P Value
CT 3
PsiRNAiKK/+ vs. TD2/+	-0.1191	-0.3493 to 0.1112	No	ns	0.4217
PsiRNAiKK/+ vs. TD2/PsiRNAiKK	0.2511	0.04516 to 0.457	Yes	*	0.0141
TD2/+ vs. TD2/PsiRNAiKK	0.3702	0.1642 to 0.5761	Yes	***	0.0003
CT 9
PsiRNAiKK/+ vs. TD2/+	-0.05075	-0.281 to 0.1795	No	ns	0.8514
PsiRNAiKK/+ vs. TD2/PsiRNAiKK	0.2191	0.01314 to 0.425	Yes	*	0.0351
TD2/+ vs. TD2/PsiRNAiKK	0.2698	0.06389 to 0.4758	Yes	**	0.008
CT 15
PsiRNAiKK/+ vs. TD2/+	-0.1116	-0.3418 to 0.1187	No	ns	0.4673
PsiRNAiKK/+ vs. TD2/PsiRNAiKK	0.1652	-0.04074 to 0.3711	No	ns	0.1358
TD2/+ vs. TD2/PsiRNAiKK	0.2768	0.07082 to 0.4827	Yes	**	0.0065
CT 21
PsiRNAiKK/+ vs. TD2/+	-0.06597	-0.2962 to 0.1643	No	ns	0.7628
PsiRNAiKK/+ vs. TD2/PsiRNAiKK	0.2111	0.005122 to 0.417	Yes	*	0.0436
TD2/+ vs. TD2/PsiRNAiKK	0.277	0.07109 to 0.483	Yes	**	0.0064
Figure 2-S1B
	PsiRNAiKK/+	TD2/+	TD2/PsiRNAiKK
Mean	1.212	1.298	1
SEM	0.04887	0.02771	0.01385
Number of samples	12	12	20
One-way ANOVA followed by:
Tukey's multiple comparisons test	Mean Diff.	95.00% CI of diff.	Significant?	Summary	Adjusted P Value
PsiRNAiKK/+ vs. TD2/+	-0.08683	-0.1953 to 0.02162	No	ns	0.1386
PsiRNAiKK/+ vs. TD2/PsiRNAiKK	0.2116	0.1146 to 0.3086	Yes	****	<0.0001
TD2/+ vs. TD2/PsiRNAiKK	0.2984	0.2014 to 0.3955	Yes	****	<0.0001
