# Supplementary material for: Drosophila PSI controls circadian period and the phase of circadian behavior under temperature cycle via tim splicing
Source: eLife journal article supplement (doi:10.7554/elife.50063), 2019-11-08
Supplement: supp [file elife-50063-supp-v1.zip › elife_poa_e50063_Figure_2_figure_supplement_2_source_data_1.xlsx]

## Sheet: Averages 1
0-72 hours: 12-12 Light-Dark (LD)
72-120 hours: Constant Darkness (DD)
Period analysis: DD, 72-120 hours.
Time (hrs)	TD2/+; ptimTIMLUC/+	PsiRNAiKK/+; ptimTIMLUC/+	TD2/PsiRNAiKK; ptimTIMLUC/+
0	13042.6	15592.5	16446.2
0.5	15368.1	16674.7	17299.7
1.00028	18679.5	19828.6	17458.9
1.50056	19352.6	19938.9	19822.6
2.00083	21403.2	21394.9	20525.9
2.50111	22740.1	22079.6	22053.2
3.00139	25393.4	99514.4	24020.1
3.50167	26961.2	27125.3	24540.9
4.00167	29094.1	29867.6	27759.2
4.50194	29476	29000	28306.2
5.00222	31600.9	32036.1	30625.8
5.5025	32483.8	31881.2	30733.9
6.00278	33263.8	35683.6	32885.9
6.50306	35953.7	34027.2	32667.9
7.00333	34973.9	34831.2	34633.9
7.50361	36039.8	37596.2	35108
8.00389	33512.1	37082	34207.7
8.50417	37125.3	40086	36083.6
9.00417	35183.9	38756	36918.7
9.50444	37035.7	38972.8	36721.6
10.0047	36165.6	39633.6	36906.4
10.505	38002.5	43339.8	38354.8
11.0053	35889.1	39508.4	36688.8
11.5056	37347.1	45515.5	39815.6
12.0058	35977.1	43181.1	39077.3
12.5061	39933.9	48171.6	43097.3
13.0064	41747.5	53246.4	46412.9
13.5067	46000.2	57780.8	50005
14.0067	48680.2	58870.7	51520.6
14.5069	50650.7	62182.1	54625.2
15.0072	52583.1	60696.2	57699.4
15.5075	53643.8	63651.9	58045.4
16.0078	54640.1	64156.8	55992
16.5081	52227.8	65087	57559
17.0083	53526.8	64607.5	55691
17.5086	50030.5	63635.2	57764.1
18.0089	49230.3	59331.8	53814.1
18.5092	49361.4	61500	53430.2
19.0094	49393.2	56181.8	52373
19.5094	46072.6	56580	52022
20.0097	42844.3	53493.2	48865
20.51	43563.8	51694.8	46421.1
21.0103	40378.5	42945	42906.7
21.5106	37963	37768.9	40150.6
22.0108	34379.9	32672.5	35634.8
22.5111	36175.5	28513.2	37568.3
23.0114	32296.9	27740.5	33027.6
23.5117	30403.9	26484.7	29828.9
24.0119	27216	24724.2	27733.2
24.5122	21129.3	19755.7	21326.1
25.0125	17386.1	15904.3	17289.1
25.5125	14950	13224.5	14190.7
26.0128	12505.8	12179.5	12509.1
26.5131	10506.1	9906.83	10843
27.0133	9498.08	8750.17	9315.78
27.5136	9125.5	8017.42	8667.33
28.0139	7830.17	6943.25	7831.44
28.5142	7700.75	6568	7842.22
29.0144	7551.5	6441.58	7421.78
29.5147	7849.5	6251.25	7737.33
30.015	7815.25	6133.08	7473.89
30.515	7642.58	6198.5	7908.22
31.0153	7993.08	6374.42	7996.56
31.5156	8360.08	6718.42	8647.22
32.0158	9117.08	6938.25	9022.67
32.5161	9956.25	7687.42	10086
33.0164	10514.4	8552	10943.9
33.5167	11552.9	10125.8	12717.2
34.0169	12921.7	11018.2	13171.7
34.5172	13543	11794.8	14788
35.0175	12914.3	12880.3	15300
35.5175	13185.1	12543.8	15246
36.0178	14347.2	13678.7	18345.9
36.5181	18856.9	17445.5	22390
37.0183	24121.8	22211.3	26959.6
37.5186	30814.8	25153.3	31087.9
38.0189	38549.2	29406.1	35884.2
38.5192	39991.8	28963.2	38959.4
39.0194	43266	32812.3	42259.9
39.5197	45484.6	34334.2	42893
40.0197	50276.2	36650.6	45989.1
40.52	48399.2	36840.7	43914.6
41.0203	49621.3	37216.8	48557.3
41.5206	50452.4	39230.5	48482.1
42.0208	49741.8	38781.2	46966.2
42.5211	48639.1	39896.4	45741.4
43.0214	48985.1	38931.2	47349.9
43.5217	47467.7	38759.6	47473.7
44.0219	47079.5	35711.8	46196.3
44.5222	45960.4	37198.2	44708.1
45.0225	43455.8	34909	41030.2
45.5228	40639.8	33300.7	38524.4
46.0228	36313.4	26980.3	35462
46.5231	32734.9	23000.8	30035.8
47.0233	25035.5	18512.8	26928.8
47.5236	19773.9	14059.9	24002.7
48.0239	20832	13020.2	22240
48.5242	15526.1	10814.2	15924.4
49.0244	13976	11108.3	14406.6
49.5247	11268.1	9051.75	11490.9
50.025	9412.33	8433.58	10025.7
50.5253	7668.92	6482.58	7743.56
51.0253	7119.17	5876.75	6840.89
51.5256	6384.08	5279.58	6050.33
52.0258	6189.75	4894.08	5689.44
52.5261	5410.83	3788.92	4838.89
53.0264	5247.17	3913.5	4871.11
53.5267	5081.33	3598.92	4477.33
54.0269	5205.67	3445.75	4567.33
54.5272	5281.92	3505.33	4624.11
55.0275	5226.75	3618.67	4419.56
55.5278	5346.25	3490	4629.67
56.0281	5811.67	3855.17	4975.67
56.5283	6521.25	4245.92	5442.11
57.0286	7009.5	4608.67	6512
57.5289	7878.75	5177.75	7131.67
58.0289	8460.42	5857.25	8270.89
58.5292	9020.75	7119.33	9229
59.0294	10460.2	7989.83	10619.9
59.5297	10229.2	8101	10788.2
60.03	10402.5	9129.83	12086.8
60.5303	12290.8	10211.5	14504.4
61.0306	17762.1	13192.1	18828.7
61.5308	22186.5	13860.9	20124
62.0311	25878.4	14726.3	22542.9
62.5314	28213.9	18157.6	25482
63.0317	30651	19303.8	26212.8
63.5319	32592.6	19170.4	28316.1
64.0322	33222.7	19630.7	28665.7
64.5325	32719.1	21374.2	29751.2
65.0328	34082.1	21509.6	32113.2
65.5331	34008.2	20938.6	29067.4
66.0333	36485	22566.2	30601.1
66.5336	34302.9	21787.4	31425.3
67.0339	35989.4	22599.7	32068.1
67.5342	34956.3	24426.7	31371.6
68.0342	36018.5	22957.9	30885.7
68.5344	32692.7	23557.5	29709.8
69.0347	30704	20654.8	28416.8
69.535	28740.3	20374.9	26389.4
70.0353	27387.8	17431.8	24846.9
70.5356	25459.2	14022.8	22462
71.0358	21687.3	12700.8	19060.2
71.5361	19396.9	11783.6	18272.2
72.0364	19595.8	10009.8	17169.6
72.5367	18953.7	11413.7	16689.1
73.0369	16660	9716	15203
73.5372	15191.3	10292.2	12667.6
74.0375	14761.9	9231.08	12975.1
74.5378	13583.1	8283.42	11754.3
75.0381	12721.2	7230.08	10957
75.5383	11826.2	7667.08	9820.78
76.0386	10961.8	5837.08	8863.33
76.5389	11067.3	6193.17	8553.89
77.0389	9867.92	5016.92	7665.67
77.5392	9749.92	4626.33	6967.78
78.0394	8717.75	4389.33	7339.22
78.5397	9437.58	4228.17	7241.67
79.04	8906.75	3952.5	6915.11
79.5403	8924	4196.17	7117.44
80.0406	8694.75	4638.42	6553.33
80.5408	8646.17	3843.25	6533.89
81.0411	8561.5	4155.25	6533
81.5414	8251.75	4635.33	7365.56
82.0417	8257.42	4472.75	6908.89
82.5419	8460.33	5236.58	8419.33
83.0422	9483.75	5373.75	7867.67
83.5425	9353.08	6099.58	9140.89
84.0428	8053	6241.5	9108.89
84.5431	8922.33	6544.25	10581.4
85.0431	8126.33	6616.17	10598.8
85.5433	9299.92	7745.75	11543
86.0436	9902.92	7850.67	10557.7
86.5439	13651.2	8645.58	11448.3
87.0442	14225.5	8682	11949.9
87.5444	15718.8	9280.42	14099.3
88.0447	15965.6	9650.75	14443.2
88.545	15949.5	10553.4	14890.7
89.0453	16130.8	9793.92	14632.9
89.5456	17741.2	10118.7	15538.7
90.0458	17708.4	11459.5	14945.3
90.5461	17278.4	11468.3	15144.3
91.0464	18489.9	11278.3	14629.6
91.5467	17644.2	10503.1	14188.9
92.0469	18140.2	10439.4	14165.9
92.5472	18297.4	11823.7	14843.8
93.0475	16672.3	11224.5	14913.7
93.5478	15889.4	11030.8	15476.7
94.0481	16447.5	10393.9	13680.7
94.5483	16019	11518.9	12986.9
95.0486	14589.6	10131.4	11538.7
95.5489	13384.8	9577.58	11169.9
96.0492	13791.3	8895	10356.1
96.5492	13628.3	9113.5	11081
97.0494	12738.1	9385.75	11208.3
97.5497	12357	9664.17	9985.11
98.05	11753.1	8200.08	9553.33
98.5503	11467.4	7930.75	9354.11
99.0506	10984.5	7619.25	9191
99.5508	10461.2	6893.58	8114.67
100.051	10346.2	6678.5	8576
100.551	9601.58	6216.58	7706
101.052	9296.58	5930.58	7640.22
101.552	9235.25	5496.75	7208.44
102.052	9108.25	5911.5	7715
102.552	8993	5319.17	7913.56
103.053	8747.58	5575.58	7919.67
103.553	8566.75	5669.67	8038.33
104.053	8672.67	5331.42	7488.89
104.553	8363.25	5375	7762
105.054	9206.67	5703.67	8151.67
105.554	8815.33	5941.83	8061.33
106.054	8816.17	6216.33	8592.33
106.554	8971.83	6555.08	8556.33
107.055	8641.33	6188.5	8864
107.555	8310.67	6265.33	9022.67
108.055	7910.75	6291.67	8836
108.556	7627.5	6520.33	8773.78
109.056	7575.67	6485	8587.11
109.556	8378.08	6773.42	8498.67
110.056	7802.5	6840.83	8444.67
110.557	9515.33	6700.25	8420.22
111.057	10273.8	7605.33	9395
111.557	10533.3	7179	9177.56
112.058	10977.3	7105.08	9293.56
112.558	10346.9	7248.42	9779
113.058	10082.6	7351.83	8705.78
113.558	10127.9	7258.92	9580.56
114.058	10255.6	7335.5	10285.1
114.559	10012.9	7854.75	9573.56
115.059	9916.83	7583.67	9012.44
115.559	9751.67	7847.42	9505.56
116.059	9155.17	7839.33	8455.44
116.56	9595.83	7178.67	8887.22
117.06	9067.5	8038.75	8808.56
117.56	8654	7564.75	8845.89
118.061	8492.17	8557.33	8000.22
118.561	8877.5	7121.33	7738.22
119.061	8503.08	7791.92	7657.67
119.561	8298.58	7411.83	7346.89
120.062	8497.17	7346.83	7419

## Sheet: Wells 1
		TD2/+; ptimTIMLUC/+ Wells												PsiRNAiKK/+; ptimTIMLUC/+ Wells												TD2/PsiRNAiKK; ptimTIMLUC/+ Wells
Time (sec - from reader)	Time (hrs)	A01	A02	A03	A04	A05	A06	A07	A08	A09	A10	A11	A12	G01	G02	G03	G04	G05	G06	G07	G08	G09	G10	G11	G12	C01	C02	C03	C04	C05	C06	C07	C08	C09
0	0	11117	14915	11737	11746	18581	13678	11771	10801	11282	13012	11792	16079	15155	10514	17581	30430	10286	20682	19341	12750	12176	16425	8113	13657	14691	26898	18480	17163	14455	13670	15699	14708	12252
1800	0.5	13661	17180	14860	15104	17450	20379	14142	13033	15172	16417	9818	17201	18176	7814	14948	28121	12877	19425	20695	16813	13543	19969	11598	16117	14611	35527	20417	19699	14041	14687	12354	13455	10906
3601	1.00028	13737	19324	19815	17020	26514	23619	15906	15902	17037	20864	12902	21514	21602	11079	18615	30598	13164	20088	24155	18611	15117	38612	11835	14467	14564	27442	22661	16742	16370	17244	14704	15725	11678
5402	1.50056	14868	19750	17256	19168	25092	26885	16341	16830	18374	22125	12978	22564	20999	11012	17463	26708	13362	19733	25594	19189	17779	37506	12932	16990	17201	34869	26180	21134	16817	18446	14619	16020	13117
7203	2.00083	17366	21400	20581	20358	24995	28505	18117	19568	19868	24699	14585	26796	21362	13796	22066	30805	16978	23476	24417	20999	18252	31261	15666	17661	18809	32957	22446	24028	16767	19649	16400	18020	15657
9004	2.50111	18936	25054	20864	21522	24906	28940	19522	19741	21788	25750	16450	29408	24999	7839	18223	31708	16615	25767	27294	25450	20995	28666	16995	20404	20619	35978	23244	26522	17429	20872	18277	18476	17062
10805	3.00139	23248	25311	24286	25109	27033	31151	23509	25235	24543	27872	16931	30493	24645	16463	907170	36759	18307	24535	29940	27687	25969	36008	22168	24522	25113	39894	26075	25016	19999	22290	16611	20395	20788
12606	3.50167	27346	26991	25147	24429	31666	33392	25472	22914	23716	30708	18438	33316	28602	15484	27940	41641	19801	24303	33413	28315	25379	35426	22509	22691	25353	34932	25847	27286	20864	24429	17796	21864	22497
14406	4.00167	25995	27986	30046	27408	32822	34666	26168	26733	24366	31560	22957	38422	30231	26041	29784	41591	22218	31666	36025	32514	29138	29235	25585	24383	28569	39291	32818	30354	22408	25189	19877	26374	24953
16207	4.50194	26522	28451	32539	27151	33831	36198	26961	27050	24758	33953	20155	36143	30024	31003	26455	35497	21851	32417	32923	32168	30176	23830	24746	26910	29425	37109	34084	31442	22788	27244	20657	27244	24763
18008	5.00222	28088	30607	37160	29164	34590	36578	29294	29792	25974	37666	21353	38945	31046	15113	29687	44473	25307	35194	41055	34848	33497	32894	31518	29801	34345	41291	36400	31096	27214	26463	22889	28657	27277
19809	5.5025	28801	33409	34784	34569	32607	36333	27535	31446	28109	37147	21817	43249	31105	24484	28214	39953	28683	33181	42709	34658	34641	26758	29581	28607	30206	40861	32653	36422	28214	28206	21788	29716	28539
21610	6.00278	30134	29383	36481	35447	35856	39595	28438	29560	32172	38282	21471	42346	38439	20670	30261	41063	29577	33269	40996	38890	38865	46731	35531	33911	34046	42574	38320	36772	28940	30784	22370	32164	30003
23411	6.50306	31071	37422	38903	36983	39012	43237	30193	32206	31898	42878	24569	43072	38510	25434	35012	41692	27421	36054	37211	36325	34282	34565	32501	29320	34514	39920	33109	37527	28932	29889	23834	32987	33299
25212	7.00333	34443	33084	36616	37143	37329	38101	32333	31265	31311	39970	24362	43730	38540	18771	35679	46887	32565	39270	32868	35552	33966	37835	33696	32345	35113	41667	45178	38637	31421	30527	22653	33856	32653
27013	7.50361	29649	37565	36983	41127	38493	42658	32248	34367	34915	39726	25252	39494	42245	19121	34742	48018	34379	43486	42253	40388	40169	35480	32797	38076	35008	39207	36295	46461	33278	33084	23847	38789	30003
28814	8.00389	31379	33907	34738	35143	35067	39624	31544	31210	30805	37873	20834	40021	41633	24813	31286	39958	41228	43334	36535	45380	38173	31219	35535	35890	33776	39941	34911	41072	32683	33463	24214	34383	33426
30615	8.50417	33620	37797	35443	39738	39650	42891	35915	32691	33713	41937	26868	45241	46554	26936	41203	50811	31434	42051	41688	54285	39831	38392	33455	34392	36797	39051	42182	37721	35375	35586	24121	37396	36523
32415	9.00417	31206	34548	37152	36687	36097	39911	31430	34818	35624	40072	24168	40494	50314	20252	31729	42507	32729	42912	47608	41131	47634	33307	37865	37084	36472	39907	47554	38017	36569	39283	26763	35535	32168
34216	9.50444	33430	37080	37067	42123	38055	38675	35168	36244	32257	43300	26252	44777	49537	19847	36970	46064	33907	50335	47132	41072	41528	34936	31050	35295	35455	44760	32598	42009	35886	36455	28602	38367	36362
36017	10.0047	33489	33966	35983	39506	37995	39021	33160	31290	37358	39392	26666	46161	47174	28020	39641	47807	37426	42245	41857	45558	44076	27931	34712	39156	36502	44355	39472	44309	33991	40798	24273	33691	34767
37818	10.505	33371	36396	40755	41831	42253	39337	36552	34464	38755	43962	25552	42802	50094	21463	39781	59636	39582	51115	47376	51478	46672	37189	39574	36118	38325	41106	36860	39270	39776	42891	30784	36953	39228
39619	11.0053	32527	35953	34957	37628	39430	36139	35075	36624	35126	40865	24564	41781	48326	25944	37903	46380	34329	40958	42566	40574	39008	43215	39350	35548	33501	42093	38607	38599	35658	40114	26235	40620	34772
41420	11.5056	32733	36227	38873	41599	33822	36941	37017	34961	34966	44891	27843	48292	58674	24471	39591	46380	51786	47085	47035	48195	49765	38797	46811	47596	39641	45165	40350	43215	42304	43844	23758	37915	42148
43221	12.0058	32771	33637	38055	38717	34708	39380	31560	34476	34375	39987	29750	44309	56319	27332	40021	53968	38080	46895	46216	47659	49385	31927	41194	39177	38055	44296	37114	45642	44511	42245	26594	32096	41143
45022	12.5061	39118	36654	42924	40097	40253	39405	37054	43182	39194	45250	27543	48533	67043	21893	39667	56901	51326	53082	51280	60603	45144	36147	49318	45655	40823	46191	45254	47165	48469	41603	28442	44165	45764
46823	13.0064	36620	37987	44060	49397	38595	38447	38371	46381	39080	44942	31202	55888	61252	32088	50845	56838	47684	58822	53314	63405	57610	50449	50508	56142	44376	50339	42802	52369	53989	46072	30092	51626	46051
48624	13.5067	40350	45494	50035	49790	49406	41945	43903	46575	48655	48520	32674	54656	61446	32607	61768	76531	42452	66393	59716	67832	65329	50191	56517	52588	53242	58919	48777	54504	55289	50267	33653	46207	49187
50424	14.0067	44612	47284	54833	55352	50951	45309	46727	48524	46414	56121	31113	56922	60168	30560	55344	62877	50499	82212	65464	70884	56137	52111	60864	59328	54622	53040	50533	57838	45857	54833	36675	50094	60193
52225	14.5069	45967	48330	58328	53504	51356	46410	47161	53116	53027	49178	34827	66604	72243	22218	46072	63396	63865	77223	66600	65190	70875	66308	69094	63101	57914	62687	50503	65574	52867	48313	36839	57729	59201
54026	15.0072	47043	56070	51272	55914	53213	50541	53158	50647	49955	61902	35438	65844	73901	23172	41802	64840	51799	79313	66946	82263	75881	48009	64435	55994	63464	58800	58712	60349	61210	54268	45946	55420	61126
55827	15.5075	45697	53415	61139	62202	57817	46389	51238	53344	49845	55222	38358	69060	73737	39886	58214	72838	58501	74864	64055	61822	79342	55749	50204	74611	63084	62088	55589	64975	56804	64236	40928	54622	60083
57628	16.0078	49630	55331	55665	59307	54867	50001	50335	54074	55753	62920	40122	67676	67081	28256	64523	73994	56146	64443	74328	68988	76611	69368	56796	69347	53154	58264	51879	62096	61088	58501	44076	56758	58112
59429	16.5081	51989	55926	58691	53850	52816	47507	47060	49326	52086	48136	39042	70305	79886	37447	55863	74800	58155	75771	64055	74665	75872	58940	71563	54027	60868	58670	58902	68014	62700	51605	41262	51681	64329
61230	17.0083	50246	56825	59535	53892	51031	52622	48182	54205	52690	50520	36451	76122	70921	38194	69077	68389	63506	79405	67693	66718	62700	55998	58885	73804	59163	62911	53512	58315	56315	57547	39101	51921	62434
63031	17.5086	45055	54086	55525	54614	46735	48022	47752	49157	46566	49697	35886	67271	78430	36400	56526	65566	54686	78333	64405	68723	70959	60459	58323	70812	54610	56133	64806	59868	61134	58315	47220	56382	61409
64832	18.0089	49681	51234	54272	50508	52162	41317	50073	48870	46642	43304	37097	65604	62472	38050	58796	66427	52268	72315	55775	65046	66680	58180	56673	59299	55922	57754	56838	62860	56775	47841	41464	48706	56167
66633	18.5092	49554	48524	53631	57032	44427	42122	45929	55201	48752	52432	33400	61333	68672	30716	55006	63797	63751	77489	63958	69592	72897	49946	63359	58817	62831	56686	51934	66845	56260	45798	40013	45992	54513
68434	19.0094	48752	54479	55412	51896	48963	45823	43886	46085	46537	44313	32852	73720	72990	23834	46026	55171	60417	66047	52483	64122	60311	60202	57403	55175	57336	51693	51930	54247	61822	50368	36282	51867	55812
70234	19.5094	39122	48322	47934	47094	51111	42114	42156	43764	43114	50098	34717	63325	62320	25598	49351	67224	54086	69571	63320	59902	58758	65215	54892	48723	63038	50453	55585	62434	46802	48478	36987	50790	53631
72035	20.0097	37059	41582	43017	49111	44845	35814	38949	43735	41836	49748	32109	56327	58193	38704	51145	54930	50892	62080	55943	62320	62278	41502	55893	48039	57024	46642	44861	61869	55032	45250	32345	49803	46959
73836	20.51	40304	43034	45178	43241	47722	37607	44621	46866	42030	45887	30303	55973	53559	30725	55572	58458	50018	52972	50782	61780	56391	48047	54538	47495	56922	45368	44887	47752	50179	44368	32219	46414	49681
75637	21.0103	38181	40976	43431	44768	37704	38071	37384	39283	44165	39599	26214	54766	46271	20071	46102	48507	39928	38223	55479	39844	58193	41127	42422	39173	52436	42215	35350	48845	56268	38945	30033	39093	42975
77438	21.5106	31105	42477	39726	39004	39671	34312	36004	37620	42059	38675	25851	49052	45237	22522	30636	50537	30265	41557	43637	50731	38903	35603	21974	41625	43203	45773	40536	44351	49098	34109	25480	40067	38738
79239	22.0108	31117	31362	42106	37873	35375	31835	31147	34590	35375	34063	25028	42688	35932	18923	31459	45815	31151	27362	36198	51419	34721	32008	21041	26041	41802	37679	36101	38219	42355	31885	23754	31024	37894
81040	22.5111	31387	35822	41249	42781	37557	32653	33084	32105	38970	39122	22936	46440	34607	17358	27290	43042	23872	29590	29978	31691	38460	23459	15121	27691	42532	41641	36384	38721	44604	32636	24560	35223	41814
82841	23.0114	30632	32869	34468	34776	34312	27518	26868	31320	35493	33514	21404	44389	29429	17632	27438	37730	24374	24138	24758	31885	28075	32767	22235	32425	38810	35945	31075	37071	40565	28320	21417	30387	33658
84642	23.5117	26396	31109	31598	35219	29797	33147	24948	29906	35202	29577	19775	38173	21931	14189	29054	34991	21501	30451	28109	33417	29725	20741	27075	26632	30383	32350	28075	35818	34691	28602	19906	31197	27438
86443	24.0119	25944	28531	30936	30062	31877	23758	24117	25193	28974	27746	16750	32704	27332	15573	22345	29733	27096	28923	28214	26176	30303	18556	22374	20066	31847	28835	27556	30244	31535	24007	18467	29151	27957
88244	24.5122	20332	21674	24016	22704	21784	19007	17750	20062	24277	21501	13868	26577	19902	10493	24670	26134	19965	21100	19923	20535	18223	18809	17100	20214	25349	22121	19033	21931	23695	17678	18379	21872	21877
90045	25.0125	16602	16704	18754	19522	17505	15902	15843	16332	17607	18687	12020	23155	17775	8864	20450	18117	14594	13796	19425	17902	19788	11868	13628	14645	19058	18526	15349	16953	20547	14813	13164	19467	17725
91845	25.5125	13919	16282	15543	17931	15028	11223	13564	13712	15729	15855	9210	21404	13704	4894	16463	13438	13391	12223	14585	13919	18556	12029	13071	12421	15037	15429	13379	14315	17910	12451	10725	15412	13058
93646	26.0128	11425	11944	13252	15257	12480	11624	12944	10598	14096	12265	6649	17535	11354	6413	13678	13868	11687	12514	15033	12767	17282	10176	11602	9780	14678	13577	12126	12586	14716	10189	9252	12927	12531
95447	26.5131	9932	9894	10366	13590	11164	8611	9717	9198	10687	12316	6215	14383	11248	6181	10603	11278	9409	8371	11290	10468	13429	7999	9404	9202	12354	11750	9754	10683	14176	8729	8337	11088	10716
97248	27.0133	8674	9940	9109	11898	9611	7607	8531	8577	11332	9451	5978	13269	9670	4670	10181	10771	8742	9404	10273	8987	10062	6915	7750	7577	10295	10721	7835	9679	12699	7058	6257	9949	9349
99049	27.5136	9189	8202	9269	11548	9189	7054	7738	7877	9240	9843	5797	14560	9463	4544	8430	9911	6928	8350	9911	7198	11328	7320	6371	6455	10046	9695	7919	8050	10231	8177	5881	9383	8624
100850	28.0139	7691	7215	7674	10058	8008	6489	6945	7147	8210	8725	4822	10978	7746	2810	8143	9202	6143	5856	8750	7565	8468	5384	6780	6472	8354	8328	7666	7898	9193	6442	5776	9489	7337
102651	28.5142	7016	7442	6776	9573	8590	5729	7101	6679	8497	9227	4354	11425	6831	3498	5839	9046	6945	6864	7362	6075	9430	5113	6168	5645	8126	7645	7493	8109	9636	6248	6303	9029	7991
104452	29.0144	7101	6983	7350	9459	8033	5915	7143	6531	7864	7620	4531	12088	6388	3692	6776	8400	4485	5160	6405	6966	9328	5177	5540	8982	8185	8873	7885	6472	8615	5299	5396	8316	7755
106253	29.5147	7105	7033	7805	10543	7700	6476	7206	7063	8733	8029	4025	12476	7101	3012	6451	7392	5510	4637	6826	5223	10430	6890	5130	6413	8333	8012	7987	7274	9847	7607	5974	6594	8008
108054	30.015	7708	6907	8054	11176	8219	7008	7274	6523	8354	7489	5249	9822	6620	3223	6307	8046	5316	6375	7696	5379	6434	4789	5295	8117	8653	8809	6869	6877	8084	6510	5000	8421	8042
109854	30.515	7658	6708	7134	9535	7569	6409	7776	6696	8312	7991	4510	11413	6206	3692	7577	8210	5649	5738	6367	5333	7649	5147	6274	6540	9130	9193	7328	7286	8463	6835	6042	8615	8282
111655	31.0153	8717	7324	8071	10873	7814	6008	7953	7801	8286	7641	5552	9877	6995	3544	8316	7105	5902	6708	5886	5481	8042	6759	5831	5924	9615	9733	8628	7080	8075	6240	5713	8725	8160
113456	31.5156	7966	7388	8269	10801	7957	5999	8489	7548	9366	7691	5232	13615	7316	4337	7476	8455	6092	6194	7109	6257	8278	6556	6244	6307	9206	10434	8126	7919	9421	7569	6573	9341	9236
115257	32.0158	8902	8227	9003	12109	8700	7261	9560	8025	9953	9438	5384	12843	9274	4282	7539	8763	6405	6755	5772	6105	7704	6902	6358	7400	10632	9472	10193	8978	9598	7223	6637	9328	9143
117058	32.5161	9961	10054	10100	12645	10075	8029	10046	8653	9645	8982	6687	14598	9079	4848	8092	9269	6797	7354	6582	6497	10670	6506	7687	8868	11539	11100	10324	10725	10413	8489	7118	10134	10932
118859	33.0164	10387	9582	10619	12877	10573	9383	9763	10016	11683	10025	6755	14510	10974	6826	8746	11581	7029	8231	7396	6742	10565	8573	7282	8679	10936	12383	11873	10573	12932	10261	7404	11573	10560
120660	33.5167	13189	11134	12320	15408	12138	8666	9826	9274	12366	11438	7134	15742	12754	6046	11982	12615	10594	9674	7662	8189	11632	10012	9624	10725	12864	14003	13564	12455	14885	12134	8029	13788	12733
122461	34.0169	15096	13256	12054	14737	12480	11763	10531	12645	13501	12940	9003	17054	13805	7329	12328	12400	9733	11084	9611	8628	12041	10067	10851	14341	14792	15168	11628	11636	14387	11704	10506	13733	14991
124262	34.5172	15391	14016	15244	15843	11387	10911	13138	9223	14699	11894	11172	19598	17573	10033	12957	12699	11514	11071	9544	10442	12130	10632	10269	12674	14636	16573	14104	16834	15666	13501	9552	17109	15117
126063	35.0175	17066	17438	14826	13214	13037	9282	13670	7193	14286	11556	9624	13780	14872	10113	14434	14674	13337	13666	10468	11548	12834	10814	13472	14332	14033	17332	16484	14463	20307	13809	11818	14050	15404
127863	35.5175	17898	16391	16045	12185	10628	12202	13969	7894	12467	9046	12894	16602	13961	9856	13214	13839	13037	11881	12143	11476	15155	11754	10649	13560	14210	18092	14463	13526	18585	17982	10645	14691	15020
129664	36.0178	19687	19957	17923	9776	12003	16547	16109	6329	13586	11159	12932	16159	13611	12505	15429	18058	13210	13130	11311	14607	15408	13645	9674	13556	19539	19851	20910	16071	23573	19666	12307	15657	17539
131465	36.5181	22978	25611	24708	17227	13999	17978	20151	12332	18045	15636	16531	21087	14792	14725	17771	21227	17564	18898	14417	17471	20066	17965	16088	18362	21476	23927	26657	18742	26923	27505	14940	20860	20480
133266	37.0183	28240	29527	30176	22471	22699	19725	28147	22138	21193	20227	19809	25109	21412	13666	23083	33269	20788	26396	14324	20792	24653	23223	22210	22720	25142	29248	27936	27467	32122	24450	19927	30151	26193
135067	37.5186	38215	32835	35928	27898	26569	27953	29657	21518	34590	29235	23906	41473	24801	16978	23138	31666	22218	31738	18214	24691	35206	21986	23965	27239	29134	40367	33455	32037	31214	31843	17421	30067	34253
136868	38.0189	45427	35666	41798	40194	39384	31362	41777	29421	44486	39287	23758	50031	29805	22552	31067	36413	32223	34333	25784	26691	36759	23526	28510	25210	47085	45334	33366	39700	35831	35936	25847	27860	31999
138669	38.5192	44950	35248	43701	37974	42312	35831	45089	35434	44570	39025	27535	48233	37038	22763	33776	37974	24256	29370	19944	25227	35265	28345	26737	26864	43194	40970	39346	41857	46929	34088	28948	36046	39257
140470	39.0194	48242	40983	45650	41591	44060	32020	48398	39966	53977	50461	25611	48233	38506	21151	31130	46621	28932	33151	22467	26944	40873	32822	35493	35658	45916	48288	48005	32054	50799	42409	33383	42169	37316
142271	39.5197	46596	41578	48406	44237	41836	36637	50250	44186	56036	53563	30332	52158	44557	32531	40088	42950	28661	34219	21657	27742	41481	37498	32046	28581	54112	46836	40768	45347	39481	43587	33037	40498	42371
144071	40.0197	48566	51398	57214	48866	54120	36548	52749	47853	57041	52263	34713	61983	30088	19843	38624	50461	33708	43515	28303	38818	46925	36481	34624	38417	61181	51664	39126	47005	51795	47351	35075	47355	33350
145872	40.52	48199	45397	50892	45925	45330	36700	50254	44393	53960	59809	34248	65684	31295	23421	41308	50930	37814	37628	24569	33717	46001	41861	35717	37827	56095	51799	44806	46642	47448	42274	27526	34231	44410
147673	41.0203	49322	47955	53428	47516	42515	37527	52246	46874	58606	62645	30594	66228	37181	23893	53664	52415	37329	41844	16294	34371	44646	32438	28653	43874	56796	53968	47558	52593	47583	45891	31003	53188	48436
149474	41.5206	46857	53968	49955	48938	52664	32236	56319	50710	57501	60472	34067	61742	46840	28543	40203	55213	36806	36097	21505	30742	54985	47191	32088	40553	54133	58492	46262	53964	58978	42730	32670	42038	47072
151275	42.0208	47140	52715	55103	48081	56876	40422	48005	49520	53285	51943	35282	58530	43650	32662	45254	46971	33426	38384	26940	30176	50048	43329	36987	37548	60755	57973	44730	47895	48220	40869	32430	44304	45520
153076	42.5211	48845	47820	54192	52892	55336	45300	47511	46684	50976	47883	27142	59088	50993	30944	41874	57437	37586	48233	20024	32143	51001	42722	32898	32902	62430	48718	43169	45363	47482	37730	34632	43097	49052
154877	43.0214	49731	49849	57171	51491	51352	36662	48351	46220	53888	48470	31982	62654	53010	25438	39295	53711	38683	35924	24788	29320	50018	38379	34202	44406	54471	55340	48596	48301	44195	49423	32269	46051	47503
156678	43.5217	46207	47997	51799	46056	50546	38354	49153	42131	54365	51360	31219	60425	37160	34156	37696	52521	33759	57463	22889	37573	47035	37434	30408	37021	58374	62274	45899	44840	50546	43954	34535	45596	41245
158479	44.0219	45258	43726	54015	44908	58146	33341	40755	45148	53985	48427	30556	66689	40270	33041	21990	59607	35704	36291	24138	29843	50010	29548	33063	35037	51803	48132	49601	43532	53432	43477	35033	40844	49913
160280	44.5222	45334	47646	51964	48786	53344	33531	46237	40810	50149	47127	28024	58573	38455	18893	41089	48820	33987	45785	25168	23446	50841	38730	32645	48520	54293	56399	44511	44038	42122	45646	29164	36806	49394
162081	45.0225	47469	43321	45195	46165	47638	33375	43507	43840	46360	48866	26248	49486	40565	21957	41443	47630	29016	45743	24227	32193	48862	31999	25569	29704	52576	46515	46207	37793	39958	39743	30408	33409	42663
163882	45.5228	39312	40797	42076	37827	40038	32544	37510	41355	49402	45743	24691	56382	56610	20438	38295	41671	33227	40076	19632	25889	44633	26307	23320	29510	46013	46798	37438	38869	42751	33468	25088	35966	40329
165682	46.0228	38244	38152	39316	40401	40270	27029	35713	31679	38481	42026	22062	42388	31358	17066	34485	39295	26501	23168	15813	17569	48672	30780	15138	23919	45963	41190	34978	39937	35540	30050	23286	32058	36156
167483	46.5231	35299	34999	34248	34282	36886	27889	28514	27581	38249	37346	24733	32793	26725	9092	32594	31278	21408	18138	14560	26906	30121	23062	15147	26978	35582	36409	32662	32919	32704	27223	20163	21771	30889
169284	47.0233	26898	27434	22712	19581	27227	25429	26944	17661	29442	30172	19767	27159	19505	5919	28012	26598	19391	14261	16531	16957	26066	11164	11991	25758	28780	34822	30569	25442	25699	30003	16936	19155	30953
171085	47.5236	25826	25948	16775	13826	21661	22978	17657	11489	20358	20294	17185	23290	18147	5974	15058	19231	12759	12029	12552	15657	19096	11370	8590	18256	27628	31016	25231	23860	24488	28113	14007	19037	22644
172886	48.0239	29071	25121	18628	14805	17936	21379	19332	19682	16531	23598	18256	25645	15066	9754	14628	15134	14640	15704	9337	7417	17839	13037	8396	15290	28413	25607	23455	19446	21906	23632	16855	16598	24248
174687	48.5242	16898	15775	16822	17944	16653	13484	13856	13362	14172	16872	11615	18860	13307	5662	14640	12885	10949	12877	8054	4573	13965	14189	7497	11172	20881	19741	14902	18231	14856	15197	12058	10674	16780
176488	49.0244	13033	12970	14792	14277	16640	14332	12788	15615	14543	14868	8868	14986	11565	6898	14176	16822	10088	11670	6987	4481	14168	16860	7518	12067	18919	17509	12497	18619	14417	13071	10738	11088	12801
178289	49.5247	10982	9889	13126	10438	13552	8493	12451	11556	14514	10965	6961	12290	9662	5978	9881	14843	7776	10915	6902	4329	11164	10936	8704	7531	13088	13602	9961	12522	12261	10079	7202	12438	12265
180090	50.025	9552	9641	10286	10062	10442	8421	8982	9746	9704	10607	5476	10029	9172	6653	9455	12978	7430	9012	6004	4451	11687	9759	7826	6776	9860	12316	9506	10565	10079	9333	6485	11809	10278
181891	50.5253	7459	7063	8565	7658	8662	6480	6430	8080	8126	9349	5118	9037	5497	4232	9324	8206	6472	7139	4565	4147	8067	8666	5510	5966	8611	9290	8004	8506	7118	7704	5755	7198	7506
183691	51.0253	7185	7282	6396	7582	8139	6620	6848	7734	6835	8042	4375	8392	5751	4978	7185	8531	5265	7063	3797	3552	8278	5620	6105	4396	8670	8514	5907	7350	6172	7573	4535	6696	6151
185492	51.5256	6991	6291	6455	6780	7514	5578	5978	6223	6839	6413	3797	7750	4903	4514	6658	8793	4540	5873	3358	2814	7632	5097	4595	4578	6738	7215	7489	5692	4776	5472	4713	6261	6097
187293	52.0258	6426	5578	5843	6514	6734	5890	6206	6037	6864	7329	3574	7282	4185	3806	7265	6666	3544	6160	3485	2692	6801	6206	4012	3907	6210	6814	6185	5493	4987	5763	4438	5206	6109
189094	52.5261	5548	5371	5341	6016	6160	3936	5350	5025	5270	6750	3012	7151	3641	2194	5168	6286	3586	4362	2502	2017	4978	3228	3877	3628	6371	5683	4768	4181	4232	5042	3991	5084	4198
190895	53.0264	5827	4894	5046	5358	6215	4253	5236	5320	5046	5852	3430	6489	3894	2346	4873	6375	3768	4139	2489	2320	4797	4810	3742	3409	6295	5396	4772	5050	4232	5573	4059	4396	4067
192696	53.5267	5219	4784	4957	6037	5421	3941	5071	4915	5590	6088	3063	5890	3506	2283	4527	5485	2945	4097	2637	1920	4379	3443	3240	4725	5489	6227	4755	4417	3784	4510	3055	3751	4308
194497	54.0269	5067	4595	5021	6071	6088	4713	4776	5173	5607	5793	3122	6442	3696	2569	4156	4974	3181	3822	2363	1607	5012	3645	3282	3042	5624	5164	4396	4215	4565	5379	3527	4101	4135
196298	54.5272	5278	5054	5173	5767	5742	4358	5232	5620	5434	5502	3316	6907	3995	2553	4540	6063	3206	4274	2662	1325	4451	3059	3000	2936	5063	5632	5029	4941	3768	4489	3860	4329	4506
198099	55.0275	5105	4637	4721	5856	5835	4160	4768	5447	5843	5198	3401	7750	3574	2173	3713	7413	2645	4333	2679	1612	5232	3844	3050	3156	4915	5725	4814	5067	3784	3649	3367	4687	3768
199900	55.5278	5236	5438	5130	6599	5582	3700	5371	5000	5729	5734	3531	7105	2713	2502	4055	5097	3464	4274	2325	1633	5054	4202	2996	3565	4789	5181	5054	5286	3721	3979	3578	5628	4451
201701	56.0281	5662	5594	5071	6725	6502	4708	5987	5902	6907	5164	4198	7320	4561	2257	3966	5772	3506	4700	2578	2118	4746	3848	3675	4535	5417	5683	6189	5759	3991	4413	4270	5038	4021
203502	56.5283	6620	6594	6510	7885	6788	5586	6025	6160	6987	7177	4185	7738	5658	2721	4730	5430	3426	4738	2806	3228	4616	5004	3468	5126	6004	7202	6713	5206	5493	5189	4004	5666	3502
205303	57.0286	6573	6468	6632	7982	7421	5805	6468	6915	7350	7674	4966	9860	5898	2882	5755	6054	4025	6059	3476	2945	4333	5274	4042	4561	7139	7717	7658	7603	5911	5860	5000	6594	5126
207104	57.5289	7949	7156	7923	10320	7957	6265	6582	8050	7396	9645	5434	9868	4687	3797	6286	7793	5417	5548	3519	3468	6725	6383	4114	4396	7831	9134	7147	8037	6919	6206	6620	7021	5270
208904	58.0289	8890	8523	9029	9856	8101	8404	8054	8025	8590	8198	6489	9366	6953	3848	7544	7898	6004	6215	5042	2991	6097	7814	5324	4557	8928	10155	9455	9181	7953	7181	7164	7957	6464
210705	58.5292	9282	9371	10172	8839	8143	6831	9084	9657	10016	8472	7847	10535	9894	6645	8240	8198	6008	8767	5071	3721	7354	9645	6438	5451	9961	9489	9143	9852	9590	7793	9636	10387	7210
212506	59.0294	11915	8421	12408	9873	8569	9160	11054	10050	10881	10463	8822	13906	10041	7198	10282	9729	6569	8860	5548	3641	9497	9674	8122	6717	11176	11683	12872	11337	10847	9358	8624	11008	8674
214307	59.5297	12670	12176	11041	11193	7067	9451	9970	8261	11286	9075	8219	12341	11754	7599	9763	10746	6434	9214	6540	4211	9400	8248	7257	6046	11079	12594	9970	10210	11417	11202	9539	11763	9320
216108	60.03	12670	13560	11046	7632	11881	7831	12826	8231	10556	6683	9573	12341	12598	8548	13003	11738	9379	10286	6392	4772	8472	8282	7198	8890	12586	13632	11100	13788	11434	13235	10674	10957	11375
217909	60.5303	12834	14362	12109	12168	10771	12121	14197	9206	13003	8409	12729	15581	11071	7624	14885	15581	9531	12442	7278	5459	10299	10425	8944	8999	14746	14113	15307	16079	14729	13265	11957	17155	13189
219710	61.0306	17796	20923	18623	18324	17990	18952	18087	13931	18585	17037	13067	19830	14510	7755	17442	18737	13421	17252	8324	5675	14277	13121	13210	14581	20543	19691	22915	18898	17598	14239	14969	21336	19269
221511	61.5308	24531	22210	22843	26691	20467	21180	24345	14569	23189	21573	17050	27590	17142	12050	16206	18986	13451	18168	8282	6362	14982	17206	12522	10974	21193	25615	21159	18910	20788	15594	18370	21914	17573
223312	62.0311	29624	27632	26353	26324	23898	22269	25286	22754	26594	27113	18446	34248	17539	9274	21535	19442	15906	16020	7582	6949	16826	18792	14071	12780	23185	25134	22725	24370	20341	21138	21109	24615	20269
225113	62.5314	27691	30763	29349	31383	22434	24573	25953	26737	29826	31345	22754	35759	22843	15919	24244	23568	18206	19661	8636	8227	18058	23400	19075	16054	27573	33552	24522	28940	24113	22560	17805	32122	18151
226914	63.0317	30712	31248	31404	35333	32109	22256	29261	29497	31442	34324	23336	36890	22260	20704	27126	24273	15261	27286	9214	9565	16758	26269	19058	13872	36341	39190	19961	23910	23632	23374	16796	28514	24197
228715	63.5319	32839	33067	31687	42076	31088	28375	28944	28012	37531	33843	27185	36464	23902	15303	24628	27396	15653	24742	13463	10527	12349	27919	18493	15670	31248	31856	28826	28797	25151	34978	20847	29278	23864
230516	64.0322	32624	32134	35350	40654	31269	27518	29839	34033	37076	36468	24851	36856	22531	19265	22902	24699	17834	21758	14404	11674	13514	29045	20779	17163	25543	28649	30071	31202	32510	25564	26349	29003	29100
232317	64.5325	34772	31864	36113	34426	35278	26721	29687	31425	33577	35763	26442	36561	28130	22636	30311	35362	13898	15345	15176	12459	15286	24965	25535	17387	34324	35683	32472	30548	27341	29484	22012	30489	25408
234118	65.0328	31949	36772	36569	37607	34464	30632	28628	26982	39354	33333	26910	45785	22379	20999	25801	32421	19121	26256	12117	8725	19062	25666	22843	22725	40591	38135	31345	35611	36346	24543	23180	31940	27328
235919	65.5331	35472	36160	31417	35084	34493	28539	30678	28303	38468	36907	25543	47035	25134	15484	26729	36654	13227	25543	10792	11759	17328	24417	23509	20687	29159	42232	27526	29873	30311	23644	25079	29759	24024
237720	66.0333	38515	36692	41350	37426	35518	30400	29999	31202	42013	39987	25172	49546	26273	20185	27337	31674	19509	26556	11514	8725	17560	34345	24358	22758	31868	43224	22754	32902	32624	24307	28256	29932	29543
239521	66.5336	38785	33923	31569	39278	32721	29936	31965	29273	34223	37097	30012	42853	26130	22893	29286	28847	21569	24995	10155	8489	17007	28151	25050	18877	41793	39354	32725	29590	29543	25227	29037	27577	27982
241322	67.0339	33776	37443	38418	36708	33328	35430	30965	32970	38097	40063	28358	46317	25893	23695	24315	26531	20514	31683	12400	8721	17244	35514	25020	19666	36822	35607	34877	33700	31700	33936	21197	32058	28716
243123	67.5342	36409	35118	38519	36886	35198	26514	35953	31695	40342	34392	25720	42730	31860	19636	27543	40354	19986	37747	11662	19898	15771	24640	25501	18522	37219	49908	29590	29020	33506	30581	18518	28611	25391
244923	68.0342	32071	36780	36392	44832	37341	29193	31717	34898	40291	37240	27370	44097	30370	18307	27142	34375	18518	31687	11109	17999	15725	28307	24923	17033	29484	38966	33168	27100	35299	31012	29020	28421	25501
246724	68.5344	31767	35784	36827	33518	31919	27809	30155	36139	32683	32295	22813	40603	30624	15872	26767	37067	18649	36476	8940	15948	15590	37337	24543	14877	32210	41182	29518	30273	30982	27636	21999	28771	24817
248525	69.0347	31151	32573	31830	38392	29362	26986	24758	29345	30505	31695	21931	39920	24805	13526	35101	33907	18151	27868	7784	14396	11117	26488	22298	12417	34434	34531	28160	22889	29206	28649	22239	30003	25640
250326	69.535	28332	30147	30932	32953	27577	21936	26109	25518	29649	28429	20547	42755	26349	16547	23417	31379	18189	24239	12041	12303	11611	32379	20341	15704	29889	28649	28020	26564	31113	24670	22796	23033	22771
252127	70.0353	25826	27535	29788	30851	27320	22855	27704	20476	28353	31750	20564	35632	27657	13535	19033	31320	15109	16471	11206	10434	9176	26066	16058	13117	27623	29581	25716	25965	24868	25459	19581	22412	22417
253928	70.5356	23893	29227	27290	29986	23488	20944	24109	17657	27016	27016	20927	33957	17636	6426	19033	24902	12278	9198	7763	12539	9932	25438	12493	10636	25176	22142	24792	24007	17142	26337	20674	23058	18830
255729	71.0358	20501	25016	22699	24054	17404	24543	22868	13834	21235	26311	18493	23290	24560	5481	15113	22619	12244	12227	5780	11392	7793	17104	8814	9282	19552	20298	21345	17851	13598	20552	19087	23277	15982
257530	71.5361	18358	24058	17493	18315	21412	19577	18509	10531	20083	21387	16893	26147	12214	7953	14379	17940	11813	14548	6261	8978	7392	15328	8050	16547	23860	22142	18336	18497	15965	16041	14856	16611	18142
259331	72.0364	20252	22611	18594	22898	20493	16915	19573	7700	19615	22362	15467	28670	10442	6181	14029	18332	10408	8417	6839	9071	6679	12927	7033	9759	20231	19868	17919	18467	16425	15573	14645	16813	14585
261132	72.5367	17602	21252	22839	19459	19147	15172	16155	16628	22569	18691	15450	22480	22421	7383	13619	18788	9965	9307	5573	7780	5949	14164	10455	11560	19298	19155	16476	15919	18290	15995	13991	14851	16227
262933	73.0369	16463	15374	18467	14864	16999	11130	15915	15974	21176	18910	12143	22505	12083	8189	13155	14041	7573	4928	6894	7674	4679	12349	9982	15045	16396	17315	19134	17142	15535	14294	12569	10949	13493
264734	73.5372	16269	13733	15902	16412	15535	11058	16813	16096	15974	14510	11552	18442	12699	9050	11193	15493	9738	11759	5704	7966	5379	12725	12746	9054	15193	15657	12615	12771	12075	11877	11193	12413	10214
266535	74.0375	15045	14180	17691	15176	15189	11345	14522	16594	14851	15590	10560	16400	9932	7354	12294	14075	7978	12316	4734	5827	5063	9413	10341	11446	14518	13666	11936	14986	12210	11505	12227	15159	10569
268336	74.5378	13809	14328	13619	13805	14029	9877	12674	14931	15780	14240	10408	15497	9269	6839	9295	11805	5472	13168	5278	6607	4299	11231	9231	6907	14653	16113	12265	11244	10792	9527	10041	12062	9092
270137	75.0381	12493	11244	14387	13442	12012	10096	11923	13130	15488	12543	11219	14678	9274	7362	7366	12759	5590	8447	4831	6257	3936	7269	6810	6860	12429	12860	13476	12586	9738	10138	9109	10050	8227
271938	75.5383	12961	10700	10666	13746	11611	8873	11155	12046	12459	13746	9210	14742	9742	5240	9632	14839	6067	8695	4417	5915	3687	7793	8223	7755	11480	12181	10552	8594	8447	7949	8350	10759	10075
273739	76.0386	11227	11480	11991	13978	10957	7784	10100	10472	11771	11733	7704	12345	6350	4590	7860	10181	4156	8362	3177	4751	2941	6708	5742	5227	10978	12602	9075	6691	8421	6502	7451	9333	8717
275540	76.5389	11999	10670	11404	12564	10801	7611	10835	11662	11417	11847	8037	13961	8261	5219	6105	11311	4025	6523	4160	5877	3379	7122	6012	6324	12940	10282	8231	7333	7354	6738	7632	8712	7763
277340	77.0389	10337	9501	11910	12484	9999	7130	9366	9219	11126	8906	7451	10986	7291	3873	6274	7776	3363	4050	3633	5721	3371	5970	4848	4033	8835	9569	8240	7375	6518	6367	6966	8231	6890
279141	77.5392	9780	10754	8679	11362	9134	7696	8932	10176	9860	9459	7324	13843	5118	4426	5000	8970	2810	3915	3810	3844	3000	4780	4738	5105	7793	7970	8666	6637	7561	5156	6274	6438	6215
280942	78.0394	7582	7869	8223	9991	9223	6409	8978	9476	8877	10438	6426	11121	5181	3877	5139	8177	2945	4683	2451	2688	3396	5713	3903	4519	8712	11328	7535	5797	7021	5219	6105	6864	7472
282743	78.5397	9679	9489	7995	12543	9927	7151	8906	8944	9493	10307	7282	11535	4713	4118	5616	6548	2658	4114	2367	3759	2898	5054	5071	3822	9624	9079	7805	6345	7189	5194	6763	6839	6337
284544	79.04	9058	9240	7940	10906	8506	5708	8712	8852	9940	9628	6953	11438	4746	3561	3852	5759	2510	4143	3029	3384	2958	4607	4628	4253	7316	8535	7742	8324	7122	6156	5299	6856	4886
286345	79.5403	7523	8839	8944	11906	6210	5869	8902	10278	10641	9965	6670	11341	4713	3700	6088	5485	2413	4742	3143	3109	3485	4135	4531	4810	8906	7793	7641	6843	7603	6885	5624	6497	6265
288146	80.0406	8729	7295	8202	10138	8392	6409	8856	9742	10446	8615	6556	10957	5607	5523	4540	8700	2628	4430	3143	3240	3067	6679	4282	3822	7350	8814	6691	6409	6831	5270	5502	6320	5793
289947	80.5408	8096	7691	8236	9746	7763	6215	9345	9708	10657	7801	7058	11438	4350	3784	4641	5232	2312	4215	3177	2877	3228	5147	4097	3059	7919	9387	6586	5953	6780	4565	5755	5818	6042
291748	81.0411	8864	6662	9303	10012	6974	5827	8421	9649	10847	9843	5974	10362	6084	4325	4464	5523	2709	4126	2996	2751	3903	4725	4333	3924	6919	7700	6784	5375	7375	5299	7468	6143	5734
293549	81.5414	8117	6898	7658	10944	8641	5375	9261	9050	9645	7721	6037	9674	5510	6641	5987	5704	2734	4869	3932	3379	3755	4805	4557	3751	8510	7687	7873	7493	7919	6341	6759	7772	5936
295350	82.0417	9544	5856	8995	9421	8012	4586	8303	8586	9666	8383	6869	10868	5535	5029	4746	6624	2654	5202	3278	3185	2962	6088	4666	3704	8345	7978	8109	5502	8333	5071	5358	7455	6029
297151	82.5419	9683	8831	8261	9911	7763	6658	7345	7864	10046	7531	7037	10594	7409	5105	6421	6485	3375	5624	4190	3025	3928	6797	5147	5333	9729	11303	8476	7683	8442	6210	9742	6578	7611
298952	83.0422	9835	8750	8160	11235	10518	6594	8915	10455	10653	7822	7928	12940	8434	5156	5565	6974	3810	5206	4080	4468	4434	6101	5620	4637	8852	8919	7890	8493	8835	6101	7586	6999	7134
300753	83.5425	9999	8569	10607	8577	7860	7118	8839	9037	10025	11050	7641	12915	8569	6375	6999	7843	4506	7139	5071	5198	4227	7189	5586	4493	10805	10198	10531	7944	10581	6232	9328	8645	8004
302554	84.0428	8662	7590	10822	9560	6088	6067	8615	6345	9615	6755	7847	8670	7717	6008	7928	8177	3856	5177	6734	4607	3755	8885	6177	5877	12349	10008	9881	9539	8628	6767	7860	8577	8371
304355	84.5431	9949	8155	9514	9843	5814	10020	7206	5544	12894	5548	9299	13282	9029	5219	8071	7375	4460	5810	6907	5514	3983	8236	7113	6814	10349	11725	9459	12396	11231	9548	10362	8742	11421
306155	85.0431	10400	7324	6523	7915	6257	8936	8902	4544	7430	8155	10489	10641	8185	5628	8096	8868	4827	5831	6569	5350	3903	8358	7518	6261	11345	10527	11999	9417	11029	12995	8691	10020	9366
307956	85.5433	12872	9725	7126	9075	10227	7590	10721	4059	10311	10784	9392	9717	8033	5683	10117	10092	5898	7759	6999	6852	5244	10324	9219	6729	13096	12906	15265	9160	11164	11948	10041	10417	9890
309757	86.0436	13864	11413	7919	11286	8223	7105	10704	3219	13391	8679	9717	13315	8189	6059	8991	10889	5919	8953	8409	5405	5000	10235	8244	7915	10176	9539	11278	12721	12548	7831	9489	10851	10586
311558	86.5439	16594	15227	16197	15286	6936	11898	13708	11505	15138	10649	10636	20041	8982	7084	9856	13256	6021	8649	9662	5683	6392	11341	10168	6653	13413	11645	13151	10341	10999	9619	10957	13400	9510
313359	87.0442	15940	15201	15598	17746	12653	10974	15666	12206	14429	12881	11151	16261	9396	9641	9286	11598	7134	9265	7978	5978	6240	10754	9961	6953	15505	11341	11670	10383	13632	10742	10725	12767	10784
315160	87.5444	17387	17682	16277	19952	13742	10008	14860	15767	16282	14695	12278	19695	9674	10826	10379	13476	7767	9109	7746	6434	6548	11404	10695	7307	19235	15012	12898	10607	15531	13830	12543	13100	14138
316961	88.0447	15396	12581	16104	18910	14683	11818	16235	16885	18383	15505	14375	20712	11062	9894	9978	13868	7063	9881	6447	8244	9434	10370	11130	8438	16742	16805	18290	11358	14818	12797	11729	13105	14345
318762	88.545	17100	11219	18231	21552	13497	11999	17227	16535	17307	18227	12269	16231	12590	9565	12493	12915	8223	15893	6578	7118	7556	13653	11813	8244	15758	14788	17839	16455	15564	12636	13438	14809	12729
320563	89.0453	17370	15906	19910	18632	12936	11092	14948	15906	19193	17910	11759	18007	11590	7915	12240	12501	8240	13902	7248	7856	6523	9366	11472	8674	14645	12531	17965	12269	16957	12117	12548	15986	16678
322364	89.5456	16860	16940	20142	20045	15155	14071	16585	16539	19615	20218	12784	23940	12092	7354	16505	11910	10628	10235	8463	7362	5983	11227	11607	8058	16552	19125	16670	12037	17674	11991	11214	17708	16877
324165	90.0458	19235	19556	19556	21024	16408	13206	16421	16758	18231	18623	13978	19505	14834	15256	14303	15147	9552	9446	13548	7008	5827	9915	11569	11109	18758	17163	15201	10455	16737	12944	11670	14636	16944
325966	90.5461	16602	19708	19231	19488	15590	11666	17104	17602	18640	17434	13619	20657	18716	8797	12611	15202	9776	13796	13029	8489	6265	7949	13704	9286	16163	19602	15012	15396	12856	12113	13986	15480	15691
327767	91.0464	18442	17708	20514	19071	14974	14193	18332	19539	19784	18117	14480	26725	17366	7067	15214	12202	9919	11219	12231	8999	8037	11598	12894	8594	17902	17037	13176	15868	14206	12999	11607	15235	13636
329568	91.5467	16864	18594	19252	20307	14358	15075	17687	17632	18341	16134	14408	23079	18379	6244	14780	10383	9468	7742	10341	9712	7366	10556	10316	10750	17113	14877	12965	13999	14746	11691	15978	13767	12564
331369	92.0469	18657	19560	18113	20640	16058	15362	15358	21670	20336	19050	13543	19336	16294	8312	13404	7818	9295	7320	11628	9885	8252	10075	10953	12037	18961	14353	17834	11898	13645	11759	14218	10252	14573
333170	92.5472	15180	20041	17425	19666	16370	13362	18433	21100	18012	18556	14379	27045	15640	8687	15716	16054	10927	11493	8700	11172	6282	9392	17632	10189	15632	17796	16564	10780	13678	17644	12535	13607	15358
334971	93.0475	15860	16864	17476	17117	14632	12514	18045	18497	17286	15560	14674	21543	17223	6270	11387	17990	12543	13598	8105	10189	7409	8518	11640	9822	17573	18678	16560	13341	15552	12649	12640	13628	13602
336772	93.5478	18058	16999	17923	17687	14324	11565	17206	12117	18286	15518	11746	19244	16311	8366	12429	18012	9037	12716	6864	8700	7489	10303	12134	10008	15775	16248	17256	15995	15763	14353	12851	15704	15345
338573	94.0481	16657	18092	18037	18834	14847	11632	14834	13813	20260	17552	12805	20007	16434	8890	9974	17261	10105	12029	5907	9590	6367	8231	12577	7362	13071	14923	15332	14206	13910	12413	12505	13569	13197
340374	94.5483	16134	15585	17054	20227	16746	12244	15649	14501	18235	14020	12400	19433	20843	7029	11299	15990	10982	11084	11974	11012	5983	7949	12079	12003	13353	19012	13484	12366	11822	11560	10383	12797	12105
342175	95.0486	14623	14796	16581	15611	12181	11214	15079	12872	15678	15269	12294	18877	15438	6156	12737	15029	9982	9231	10712	9780	3641	7978	9624	11269	13721	15332	13771	9687	12425	8569	8801	10290	11252
343976	95.5489	15539	14792	15716	14113	10404	10818	10413	9421	15147	16598	12100	15556	17404	3877	10282	15324	10328	7653	11539	7987	3751	6936	10847	9003	12404	12889	11354	11092	11143	9535	9058	9911	13143
345777	96.0492	15214	14965	13286	17083	11299	10822	12324	9835	16126	13864	12320	18358	14227	4569	8143	12543	9970	7181	10071	8447	4502	8919	9510	8658	8607	13915	10953	8624	12801	9514	8708	8729	11354
347577	96.5492	14619	13881	16640	13999	12172	12265	12965	9805	14383	13695	12231	16885	15037	7421	8105	10940	8079	11965	9392	9349	5721	6548	8050	8755	10695	13944	11480	11370	10898	9446	8375	11581	11940
349378	97.0494	9387	14657	16611	13615	12657	9995	11598	9539	13931	15130	11704	14033	13818	6599	7953	16522	8248	11033	8417	9657	5485	5139	10358	9400	12674	12016	12476	13543	9506	9468	9759	11708	9725
351179	97.5497	14189	13278	15075	15543	12083	8662	11404	11927	13067	11505	9565	11986	14758	6126	11522	11328	8240	10923	8126	11354	5202	5489	12105	10797	10235	14054	10577	9814	9303	8101	9151	8552	10079
352980	98.05	12008	12227	13851	14379	11463	8928	10873	11586	12834	9978	11219	11691	11657	6957	10413	10864	7071	8641	6371	9168	4919	4502	9577	8261	8759	11780	10214	9902	9248	8987	8687	8784	9619
354781	98.5503	10805	13218	10674	11873	11902	8873	11712	10965	12020	11189	11227	13151	12299	5877	9354	11678	8425	7835	8345	7978	4628	5312	7320	6118	11489	9438	10860	9535	8877	8050	7936	9425	8577
356582	99.0506	10906	13045	12332	11463	10459	8510	11345	9560	11636	10539	10286	11733	12586	6535	7620	13501	7227	6738	6675	7919	4168	4012	6611	7839	10468	10767	9003	10286	9767	8227	6949	9518	7734
358383	99.5508	10143	9679	11003	13256	10172	8189	10797	10202	12792	10463	7725	11113	9299	4890	7734	11581	6278	8489	6607	5991	3282	4033	7240	7299	8535	10961	6194	8324	6713	6341	6763	10341	8860
360184	100.051	9569	11902	9265	10771	10497	9354	9683	10463	9822	11282	9012	12535	9510	4953	8995	9784	6156	6940	7565	7109	1443	3882	7143	6662	9927	14801	8075	7869	6434	7139	7839	7459	7641
361985	100.551	8037	10046	9434	11864	9472	7970	9198	9674	10282	9961	7700	11581	8670	4164	8708	8987	5755	5249	6675	7531	1713	4464	7354	5329	8704	10160	7894	7548	7063	6856	6105	8130	6894
363786	101.052	8708	9839	10535	9894	9155	7400	10075	10788	10463	8531	6653	9518	7202	5337	6510	8333	6354	5126	5552	5776	5295	4042	6143	5497	9054	10421	7231	6139	5974	6755	7932	6594	8662
365587	101.552	7316	8923	9489	11510	8438	7826	9531	8189	12750	8371	7084	11396	9248	4109	6367	8451	5126	3945	5063	5978	4147	3979	4890	4658	8016	6902	7531	7936	6042	7907	6303	7489	6750
367388	102.052	7818	9476	8877	11231	8780	7991	9649	8269	9868	6869	7371	13100	6455	4143	8480	7514	5637	6641	5822	4991	5430	3666	5978	6181	7839	9738	7451	6983	6953	8565	8493	6890	6523
369189	102.552	7683	7312	9303	11126	8653	7818	8113	9788	9092	8658	7485	12885	8603	3485	6383	7767	3776	4325	4877	6021	4067	4295	5333	4898	9936	10050	7767	7539	6417	8662	6637	7485	6729
370990	103.053	7421	7818	10092	10615	8582	8126	8185	9400	10607	7455	7316	9354	6405	5396	6801	8966	4540	4354	4894	5928	4299	4350	4886	6088	8371	11210	9898	6122	7236	7345	5755	7535	7805
372791	103.553	7544	9560	9771	8932	8282	7223	7569	9750	8594	8974	6708	9894	6223	5038	6759	6818	4430	6569	5797	5151	5810	4012	5898	5531	9999	12172	7063	9366	6198	6426	6966	6936	7219
374592	104.053	7632	11484	10666	9759	6219	6358	8227	11265	8392	8928	6400	8742	7037	4869	5852	6590	4236	4949	5147	5362	4746	3844	4932	6413	8704	11147	9029	6995	5215	5751	6594	6683	7282
376392	104.553	7464	9628	9733	9105	7852	7257	7008	8788	8358	8674	7632	8860	8307	4582	7569	8160	4185	4481	4784	5139	4202	4206	3949	4936	11024	10421	7535	6628	6497	6050	6856	7122	7725
378193	105.054	8674	10168	9514	11497	9084	6240	7999	8198	9463	10088	7269	12286	6687	6746	7134	7594	5189	4164	6198	6219	4683	4438	4540	4852	10649	12480	7594	8944	6177	6122	6734	7708	6957
379994	105.554	8079	10257	8366	9155	7442	7291	8185	7379	7700	10594	7843	13493	7021	4523	8227	7510	5337	6472	5780	5995	4620	4805	5105	5907	11573	9409	7915	7274	6067	6822	8101	7582	7809
381795	106.054	8265	9898	8636	9868	9079	8134	7843	7185	8320	10100	6750	11716	8223	5341	7556	8092	5135	5776	7075	5666	5607	6434	3953	5738	8936	13594	9784	7679	6206	6852	7438	6822	10020
383596	106.554	8936	8409	10164	8995	8088	5573	8409	11058	10130	9556	7404	10940	8084	5092	7696	7902	6801	7181	8413	7464	4498	5362	4713	5455	9544	8645	10037	7860	7953	6611	8282	9088	8987
385397	107.055	8143	10539	10003	7683	8506	6185	7337	9303	9670	7442	7776	11109	8717	5274	7054	6885	5548	6704	8037	5497	5248	5185	4358	5755	9683	9695	10020	7556	7649	9649	7096	8560	9868
387198	107.555	9063	11392	8295	7721	8877	5105	7371	9101	8404	8160	7219	9020	8020	4843	9185	7599	5004	7198	6333	6544	4974	5240	5215	5029	9569	12206	9459	9518	7873	8143	7029	9463	7944
388999	108.055	8185	10738	9223	6729	6147	6168	9029	6991	7662	6767	7464	9826	8269	5308	8598	7261	5451	6966	6341	5953	5139	5481	4742	5991	11792	9780	10792	7438	8383	8042	6940	8126	8231
390800	108.556	9801	8679	7738	8826	5810	5000	7641	4485	8506	7662	7632	9750	8290	4949	8582	7953	5810	5544	6607	7021	6324	3831	4810	8523	10729	10923	10113	9556	6928	7434	7818	7421	8042
392601	109.056	8881	8387	5135	3953	7561	7691	10333	4696	9598	8582	7366	8725	7088	4835	9797	6936	5987	5911	6177	7058	6105	4147	6455	7324	10016	10678	8611	8269	7814	7202	8552	7531	8611
394402	109.556	7725	8966	6940	8434	8004	9223	9573	6084	10261	4843	8755	11729	7523	5700	8282	6805	5527	5801	7451	5717	5877	6911	7548	8139	9898	10328	9721	7531	6940	8257	8320	7198	8295
396203	110.056	9784	9008	8949	5772	6679	7248	9965	4114	9493	4683	9151	8784	6983	7244	8771	7210	6966	7472	8299	4924	6666	6122	5130	6303	11210	10320	8476	6717	6556	8029	8290	7531	8873
398004	110.557	10252	11362	11965	10366	9649	6961	9514	3455	10839	8704	9067	12050	7050	6936	9096	7236	5270	6776	6713	6278	5767	5772	7514	5995	10535	10235	8797	5244	8459	8497	8101	6611	9303
399805	111.057	11143	10750	12328	9071	9708	8387	10902	7447	11539	9041	8375	14594	8497	5016	10767	8037	7506	7409	9510	9413	5519	6915	5827	6848	10160	12282	10560	6915	8527	8269	9695	7814	10333
401606	111.557	10383	11539	10451	10164	9974	8252	8523	10223	12265	11780	8244	14602	7417	7961	9349	8105	6632	7683	8818	8649	5253	5118	5320	5843	9257	9480	10552	10565	7641	9974	6772	7961	10396
403407	112.058	10219	12113	13982	11531	9050	9054	9885	11505	13172	11873	8518	10826	8957	6303	9324	7860	8636	7160	6957	8636	5999	4278	5700	5451	11278	11543	8345	9944	8814	7923	7506	9750	8539
405208	112.558	9978	10738	10712	12497	9227	9016	9345	11598	10953	11472	7636	10991	7911	5873	10556	7869	7788	8691	5911	8417	6160	5413	6291	6101	9501	10603	8847	9662	11147	9978	8312	10721	9240
407009	113.058	9037	10046	11096	10641	9809	8569	8843	11953	11953	11286	7544	10214	6345	8181	9299	7704	8485	7489	7620	7586	6459	6118	7042	5894	10054	8261	10227	7734	7683	8978	8733	8898	7784
408809	113.558	9535	7561	9750	11463	10029	9392	8088	10607	10978	11408	8712	14012	8738	5907	8712	6565	7459	8050	8244	7797	5493	5919	6966	7257	11974	11383	8552	8712	9864	9379	8008	9674	8679
410610	114.058	9476	8434	12404	11147	7835	7535	8341	10147	13261	11476	8928	14083	10982	5544	7974	5270	8193	10046	8193	6632	4898	6396	6797	7101	9012	10501	10944	12354	11522	10510	6662	10501	10560
412411	114.559	9717	9797	12484	12045	7708	8092	9814	9054	10982	10759	8527	11176	8974	6843	9311	10463	7839	8961	9598	7755	4000	6776	7577	6160	10046	8649	9733	12240	11539	7037	7974	10354	8590
414212	115.059	9446	11147	11307	13164	9619	7670	8143	8303	10716	11278	7033	11176	7978	4514	7729	7295	9265	9721	9548	7982	7362	6717	5438	7455	8658	7966	7961	9733	10725	7847	7869	9691	10662
416013	115.559	8826	10552	10362	12240	9008	7831	6978	7957	10906	11552	8189	12619	8375	3797	8497	7864	9307	8780	9822	7489	7809	6734	7451	8244	8523	11826	8822	11552	9835	9176	6569	9134	10113
417814	116.059	8320	8198	9164	11413	8063	7438	8624	7759	9362	12008	6594	12919	8641	4755	10813	6573	9522	7016	8607	10337	8012	6177	6999	6620	8472	9961	7472	8552	10434	8088	7134	8050	7936
419615	116.56	9214	7510	10472	11965	7961	7653	7215	11586	10809	9518	7577	13670	9185	4603	7371	6885	7755	4886	6286	10830	7809	6354	7957	6223	8387	9750	8894	9510	9852	7392	9236	8328	8636
421416	117.06	8206	10505	10375	10257	9016	7164	7333	7611	9434	9881	7071	11957	12181	8573	8953	10522	8341	4067	5637	11020	6725	4464	7814	8168	10126	9510	8345	8155	9776	6717	8658	10995	6995
423217	117.56	9434	9873	9480	10054	8134	7080	6755	6750	9012	9349	6265	11662	7831	5274	8944	8708	10830	8974	7493	8729	7084	3890	6535	6485	10759	10387	9058	7721	10062	6991	7480	10915	6240
425018	118.061	8290	6902	8970	9480	8105	5932	7514	6974	10678	9552	7143	12366	12459	6004	9147	9767	10607	9826	8738	8354	6286	6923	5860	8717	9957	10029	8949	7683	7636	7805	5253	8020	6670
426819	118.561	8092	10252	10223	9041	7826	6687	7645	9164	9691	8809	6966	12134	9206	4860	9780	7438	9771	6493	6729	7240	5244	6873	4831	6991	8978	8493	8974	8573	7215	7772	6514	7286	5839
428620	119.061	8822	9965	8814	10712	7864	7586	6696	7303	8999	7801	6632	10843	9248	6274	8801	8843	7822	5818	7603	8911	8957	6708	7156	7362	8392	8653	7497	9822	9084	7063	5852	7042	5514
430421	119.561	8105	8767	10067	9003	7797	6890	7603	6704	9742	10151	5624	9130	8455	4405	8350	7404	7063	4291	10463	11632	7847	6620	5607	6805	8295	10020	8198	7396	7966	6345	5784	6405	5713
432222	120.062	8852	9628	10362	8780	6898	6877	7206	8092	8459	9155	5687	11970	10636	5101	7953	6978	6447	7658	10851	8776	7324	5662	4789	5987	6873	10273	8012	7151	7223	7485	5025	7953	6776

## Sheet: Ave 2
0-72 hours: 12-12 Light-Dark (LD)
72-120 hours: Constant Darkness (DD)
Period analysis: DD, 72-120 hours.
Time (hrs)	TD2/+; ptimTIMLUC/+	PsiRNAiKK/+; ptimTIMLUC/+	TD2/PsiRNAiKK; ptimTIMLUC/+
0	20039.5	32666	15086.9
0.5	20004.7	31102.5	15955.9
1.00028	20232.5	28575	16503.2
1.50056	27860	30811.5	17165.3
2.00083	18071.1	31681	17659.8
2.50111	19578.2	33826	18950.4
3.00139	21280.3	36006	19709.6
3.50167	22968.6	38103.5	20541.7
4.00194	22914	38451	20952.6
4.50194	22549.6	40055	21652
5.00222	24972.3	41610	21725.9
5.5025	24246.8	41323	23015.6
6.00278	25585.2	43642	24433.3
6.50306	25018.7	42979	23316.3
7.00333	25620.5	46623	25633.4
7.50361	27640.5	47431.5	27214.2
8.00389	26657.8	49039	28188.2
8.50417	27179.2	53624.5	29357.1
9.00444	28546.3	55666.5	29405.9
9.50472	27093.8	54567.5	30532.8
10.005	27480.9	53763.5	30695.5
10.505	27647.4	51953.5	31857.2
11.0053	27169.7	53177	31586.7
11.5056	26693.8	55487.5	32292.1
12.0058	27082.9	55681.5	33284.4
12.5061	28727.7	57861	33328.2
13.0064	31475.5	66006.5	37200.3
13.5067	32653.5	61147	38154.9
14.0069	34853.6	64719.5	40322.2
14.5072	37280.2	75473.5	40927.8
15.0075	38781.9	75423.5	42262.1
15.5078	38759.6	75893.5	43435.6
16.0081	40917.8	77063	44398.8
16.5083	40075.8	80384	43056.2
17.0083	40237.7	74328	43027.8
17.5086	40401.8	75399.5	41936.8
18.0089	39908.3	75091.5	41079.5
18.5092	39583.3	72872	40931.6
19.0094	39118.1	73042.5	38966
19.5097	36924.1	72348.5	36852.7
20.01	35580.2	68353.5	36251.8
20.5103	35556.6	58974	35027.9
21.0106	32573.2	60408.5	34192
21.5108	31692.8	53497.5	30656.5
22.0111	30483.8	58250	29377.1
22.5111	28478.4	40112	26190.6
23.0114	27737.7	36151.5	24804.9
23.5117	25146.4	32980.5	22452
24.0119	22440.6	27374.5	20568
24.5122	18158.9	22024	15309.3
25.0125	15226.1	18779.5	12915.1
25.5128	12004.4	16551.5	10786.3
26.0131	10740	13858	9692.75
26.5133	8855.25	11788	7764.12
27.0136	8199.5	11062.5	7260.31
27.5136	7386.92	9018	6538.31
28.0139	7397.08	7701.5	6141.12
28.5142	6710.42	7404.5	5524.38
29.0144	6918.5	8159.5	5701.25
29.5147	6556.5	8058.5	5630.56
30.015	6985.25	7486.5	5928.38
30.5153	7223.75	7398	5846
31.0156	7239.58	8419.5	6257.94
31.5158	7721.25	9727	6725.75
32.0161	8474	9533	7817.75
32.5164	9208.17	10919	8717.69
33.0167	10070.6	13763	9995.56
33.5167	11378.2	14532.5	11042.6
34.0169	12276.2	16161.5	12366
34.5172	11602.5	18644.5	12292.3
35.0175	12326.8	18182	12455.8
35.5178	11910.2	17298.5	14160.4
36.0181	13431	20655	15914.6
36.5183	18001.2	20613	20102.1
37.0186	23671	28452.5	23598.9
37.5189	26932.2	28982.5	25294.9
38.0192	30300.6	35261	30444.3
38.5194	32803.6	38375.5	33924.6
39.0197	37439.8	44135.5	35446.6
39.5197	36566.8	36455.5	36012
40.02	38521	49813.5	39519.1
40.5203	39406.4	46815	39273.1
41.0206	39942	53698	38388.9
41.5208	41639.2	56513	39375.5
42.0211	40443.5	63496	38434.8
42.5214	40479.6	57214	39152.4
43.0217	41536.6	57359.5	40429.2
43.5219	40219.5	59944.5	38859.8
44.0219	38341.1	56091.5	37840.2
44.5222	38253.5	53063	38243.6
45.0225	32877.1	49507.5	34538.4
45.5228	32959.4	47604.5	33670.4
46.0231	30515.8	39548.5	30926.7
46.5233	28578.1	36668.5	25480.8
47.0236	23752.2	29153	22399.4
47.5239	20921.7	23547.5	20081.2
48.0242	20765.4	21128	17745
48.5244	14841.4	18859.5	14374.9
49.0244	11221.8	12997	12327.2
49.5247	9845.67	10695.5	10188.6
50.025	8592.75	8100.5	8562.69
50.5253	7692.75	8341	6945.12
51.0256	6716.83	6681	6336.12
51.5258	6019.75	6763	5515.38
52.0261	5542.33	5080	4507
52.5264	5150.58	5320.5	4167.88
53.0267	5074.17	5160	3909.25
53.5269	4938.75	4767.5	3807.44
54.0272	4828.17	4875	3909.94
54.5275	4659.25	4641	3532.06
55.0275	4725.67	5044	3751.31
55.5278	4980.33	5470	3865.69
56.0281	5428.83	5672.5	4164.75
56.5283	5477.92	6213	4639.69
57.0286	6158.67	6946.5	5745.81
57.5289	6892.58	7349.5	6748.31
58.0292	7766.58	9366.5	7658.75
58.5294	7855.5	11113	8039.69
59.0297	8518.83	11984	8979
59.53	8696.5	13037	9202
60.0303	8351.5	11497	10934.6
60.5303	10353.7	14672	13782.8
61.0306	14636.8	16102	17071
61.5308	18551.7	22769	18671.4
62.0311	22372	20596	20308.5
62.5314	23832.3	26438	22525
63.0317	24030.2	31198	20682.9
63.5319	27377	32995	23926.1
64.0322	26698.8	34252.5	24734.8
64.5325	28281.8	37132.5	25063.2
65.0328	28090.6	35770	24437
65.5331	28232.2	42639.5	26271.3
66.0333	28539.7	42243	25331.4
66.5336	27166	39685.5	25850.9
67.0339	28161.2	37757	26010.4
67.5342	28560	27275.5	26359.1
68.0344	27335.2	37615.5	25655.9
68.5347	26870.5	33027	24103.8
69.035	26013.8	30948.5	24084.2
69.5353	23356.7	32162	23081.1
70.0356	24354.8	29587.5	21729.6
70.5358	21066.5	28026.5	19151.4
71.0361	18622.7	23195	16146.4
71.5364	17439.1	16104	15384.8
72.0367	17576.7	17726.5	15109.3
72.5369	16277.1	18619	15610.9
73.0372	14193.1	15720.5	13656.2
73.5375	13620.6	13988.5	13383.1
74.0378	12746.6	13716.5	11587.2
74.5378	12114.2	12109	11581.4
75.0381	10929.6	12383	10418.2
75.5383	9993.92	10172.5	9065.44
76.0386	10478.4	11446.5	8635.25
76.5389	9829.33	9585.5	8401.25
77.0392	9076.25	10244	7353.88
77.5394	8760.92	7980.5	7026.75
78.0397	8069.5	8379	6606.31
78.54	8441.67	9714.5	7106.69
79.0403	7598.42	7518.5	6090.25
79.5406	7723.33	7351.5	6493.62
80.0408	7244.58	6446.5	6443.56
80.5411	7253.33	6615.5	6935.62
81.0411	7572.5	7309.5	6801.5
81.5414	7874.17	8008	7180.56
82.0417	6793.83	7752.5	6742.81
82.5419	7380.08	9353.5	7273.19
83.0422	7392.33	7862.5	8242.12
83.5425	8071.5	8298.5	8511.19
84.0428	7112.42	9214.5	8784.62
84.5431	6937.92	8020.5	9329.44
85.0433	6859.75	9353.5	10132.9
85.5436	7436.08	9889.5	10720.4
86.0439	10198.5	10944	12181.3
86.5442	10869.8	11674.5	11366.9
87.0444	12658.2	16627.5	11754.1
87.5447	13985.7	14549.5	13400.5
88.045	13857.4	15543	13600.3
88.5453	14372.8	16039	13376.6
89.0453	13477.2	14252.5	13495.1
89.5456	13683.9	15811.5	13723.6
90.0458	14194.2	20338.5	14084.2
90.5461	13869.8	16220.5	13789.7
91.0464	14654.6	16614.5	13971.8
91.5467	14006.8	18790	14223.2
92.0469	13675.6	15039	14316.8
92.5472	14092.7	18887	13506.2
93.0475	13716.7	17895.5	12959.1
93.5478	13554.3	16805	12741.4
94.0481	13514.8	18322	12412
94.5483	13235.3	18362	11460.1
95.0486	12923.3	15288	10615.2
95.5489	12678	14048	11213.7
96.0492	11766.8	13792	10777.2
96.5494	11760.1	12145	10141.4
97.0497	12428.2	10788	10068.1
97.55	10551.1	9339	9165
98.0503	10397.2	10866.5	8680.75
98.5503	10774.4	11680.5	8394.06
99.0506	10053.7	11016	8823
99.5508	10087.5	10347	7848.06
100.051	9580.33	9843	7575.25
100.551	8895.83	9499.5	7370.94
101.052	8590.08	9815.5	7608.31
101.552	8538.42	10022.5	6943.25
102.052	7969.08	8256.5	6849
102.552	8093.33	8811.5	7265.69
103.053	7811.92	8550	6855.06
103.553	7998.25	9094.5	7208.19
104.053	8036.92	8525	7249.94
104.553	8131.58	8265.5	7475.81
105.054	7755.42	8565	7441.75
105.554	7521.67	9237.5	7289.62
106.054	7645.92	8584	7754.31
106.554	7289.42	8222.5	7465.5
107.055	7599.08	8214.5	7766.81
107.555	6972.75	7529	8149.31
108.055	6901.75	6577.5	8234.31
108.556	7058.42	7615	8266.75
109.056	6785	6617.5	7805.81
109.556	7140.75	9117.5	8100.06
110.056	7367.5	8938	8065.94
110.557	9453.92	8758.5	8408.81
111.057	9712.33	9776	8641.69
111.557	9297.08	9927.5	8014.88
112.057	9697.58	10957	8414.38
112.558	9003.5	10885	8263.5
113.058	9064.42	8854	8814.94
113.558	8992.67	8845.5	8581.06
114.058	8380.58	9974	7927.5
114.559	8389.25	9682.5	8145.25
115.059	8448.58	10729	8116.56
115.559	8492.33	9457	7326.88
116.059	8509.5	9419	7513.38
116.56	8082.75	9159.5	7143.94
117.06	7879.08	7763.5	6962.19
117.56	8084.42	10214.5	7150.31
118.06	7466.42	8721	6674.5
118.561	7871.42	9615	7191.69
119.061	7877	8571	7101.25
119.561	7050.83	10106.5	6639.38
120.061	7550.25	7934	6205.56

## Sheet: Wells 2
		TD2/+; ptimTIMLUC/+ Wells												PsiRNAiKK/+; ptimTIMLUC/+ Wells												TD2/PsiRNAiKK; ptimTIMLUC/+ Wells
Time (sec - from reader)	Time (hrs)	A01	A02	A03	A04	A05	A06	A07	A08	A09	A10	A11	A12	G01	G02											B09	B10	B11	B12	C01	C02	C03	C04	C05	C06	C07	C08	C09	C10	C11	C12
0	0	12459	14037	11822	32415	17944	21729	26193	9738	58117	16299	11038	8683	35075	30257											12256	16083	16552	10324	31987	27180	15784	12872	12176	16231	13510	13261	9877	9366	11265	12666
1800	0.5	15915	26012	19653	18556	37422	17864	16476	16050	23218	18336	17201	13353	31172	31033											14180	15484	13079	13763	14147	21750	21467	13733	17197	16379	16058	19425	15547	14328	12370	16387
3601	1.00028	19041	29105	19564	18290	35708	17282	17282	17138	16459	18522	19383	15016	29700	27450											14607	13746	16450	14813	13362	20999	23260	13885	19045	13594	17155	21050	17860	13864	12792	17569
5402	1.50056	16820	22885	15594	129886	33345	13054	16771	15501	15893	22396	18218	13957	31784	29839											11248	14488	20138	11615	15037	25315	25720	14459	18640	14349	16374	21497	14721	18552	12518	19974
7203	2.00083	15383	29430	15138	15982	32712	13396	14640	15480	15450	19615	16349	13278	35257	28105											12619	15784	20868	13362	15134	25860	20657	16978	24370	14159	18653	23083	14678	16467	10603	19282
9004	2.50111	17155	30750	17417	15092	38139	12864	17467	16628	16324	20159	18817	14126	37936	29716											15450	17615	17834	16843	16577	32050	24902	16948	17653	17433	22615	22007	13991	18298	13029	19961
10805	3.00139	18514	29396	20391	16839	39143	15619	18636	17767	18252	23687	20125	16995	37312	34700											14303	16556	22969	15421	18817	27012	24159	17374	25379	20560	18539	25974	15185	19720	13404	19982
12606	3.50167	18298	32780	21455	17163	39878	17881	20248	18244	21771	26856	22147	18902	40279	35928											15737	16252	16839	14645	18687	31662	27446	19218	26096	18851	23974	29695	15539	19581	14733	19712
14407	4.00194	19843	31261	22054	19277	40203	18476	20442	16180	21214	23235	24324	18459	41316	35586											15758	17725	19687	16771	18640	27805	24995	19442	25345	20185	22062	29712	19007	16269	15362	26476
16207	4.50194	20227	32143	19893	19163	39375	17054	20720	15391	20543	24299	23176	18611	41958	38152											14792	19353	20066	15514	18425	30953	27109	19155	28007	20109	27818	32881	18185	16012	14522	23531
18008	5.00222	22893	39903	21134	19471	43895	19484	21678	18893	20784	26134	25206	20193	44684	38536											16446	18210	20518	15999	19315	30181	25383	21058	28843	18910	24779	28944	18822	20927	14311	24969
19809	5.5025	20577	37599	22628	20168	45254	19066	20771	16193	20796	23742	23704	20463	44009	38637											15801	20058	26585	17134	20079	27906	30906	18054	30750	17336	25370	38599	19446	20864	15041	24320
21610	6.00278	21906	37185	24020	18902	47756	22012	24117	16442	23366	24497	26235	20585	47073	40211											17121	22265	31185	21020	20400	30029	32902	24054	27290	22855	23028	39734	21682	21805	16201	19362
23411	6.50306	21303	36662	24037	19910	42025	19379	23045	15720	23471	25472	26315	22885	46739	39219											17535	21590	25560	20509	19847	22016	28358	22552	30037	20720	25349	41072	20223	21788	15185	20720
25212	7.00333	23282	35755	22379	20598	43397	19839	23079	18560	22172	25277	27801	25307	50440	42806											19602	20003	32126	20741	26590	26695	27155	25733	32991	23345	28252	39126	21071	24239	18206	24260
27013	7.50361	25408	37316	28624	22872	47191	20155	23725	19526	25598	27134	29543	24594	50774	44089											18113	23387	34037	23290	26197	32079	35122	25535	40962	24640	24923	41928	20163	24374	18037	22640
28814	8.00389	25742	32873	24488	23016	44473	20860	22725	19581	26923	27451	30046	21716	50107	47971											21623	25062	30299	22100	24796	33105	33890	26522	39620	22585	27539	48351	23332	25822	19860	26505
30615	8.50417	25953	36358	23438	22020	47482	23024	24235	16969	26412	25113	31780	23366	58450	48799											21602	26434	33130	24408	24450	38666	37270	23645	38810	24294	30809	46828	23695	25455	23125	27092
32416	9.00444	26054	36860	25687	22737	48609	23324	24615	17425	29459	25480	33577	28729	59568	51765											21666	28628	27763	26737	24826	35839	45435	27902	36675	22471	28851	45089	21450	32814	21298	23050
34217	9.50472	27375	37915	25185	25261	40435	22952	22661	17742	25577	25341	32434	22248	58336	50799											25307	26493	31008	26391	27147	39848	39515	26889	38645	26172	29151	43553	26071	34510	21050	26775
36018	10.005	24138	36046	31484	24632	40481	20788	24400	16607	29413	22830	31763	27189	52761	54766											24611	28763	37493	29273	23644	42135	37920	28683	40097	19805	29860	42827	26864	30902	21341	26910
37818	10.505	22113	37181	26974	24628	45811	21754	25767	17396	27455	26282	31050	25358	54264	49643											24370	27590	33995	27354	34404	41899	37696	27721	38548	25552	37316	44726	25699	31430	23729	27687
39619	11.0053	24298	36173	25653	25944	47136	21678	24113	17168	27100	21927	32396	22450	54378	51976											22214	29244	34354	26269	31189	43080	32544	29244	44549	22467	32311	45385	34329	29181	23104	25923
41420	11.5056	23910	35400	24986	25345	44363	21606	22868	17974	24311	22763	31809	24990	56040	54935											26940	29737	34805	28337	30771	36675	42161	33869	42886	24400	29391	52841	27164	27674	25653	23370
43221	12.0058	22902	36599	25400	28316	42574	22109	24598	20556	26172	19872	29864	26033	59319	52044											22277	30581	33999	22733	29691	50803	36016	36388	47533	27872	29400	49605	28678	28868	27602	30505
45022	12.5061	23733	41084	33025	28683	40443	22493	25906	19923	27121	24927	32923	24471	60429	55293											25227	33485	35793	25383	28404	41342	29451	33991	54715	26839	35869	49613	28564	30995	26353	27227
46823	13.0064	23653	42756	31193	29489	48950	24931	27598	21868	30046	29290	35599	32333	62269	69744											27210	36430	40375	36886	35831	46207	33362	37232	52394	27965	51609	59442	29759	26699	25210	28594
48624	13.5067	26290	45085	29995	32582	51183	28953	30003	26429	30168	21733	37443	31978	66764	55530											31092	40570	37063	33721	35953	50862	38586	35915	51466	31548	37856	54082	36805	32413	31210	31337
50425	14.0069	24712	43726	37265	38439	49849	27999	29797	27691	34020	31058	43055	30632	63806	65633											31991	38202	31210	32189	38704	52791	52002	42536	59606	31835	39185	66195	36843	36751	28699	26417
52226	14.5072	28801	49681	38422	37793	53926	30084	32856	25784	34940	34215	46613	34248	74610	76337											34101	38029	34915	37156	42819	55124	49453	39266	50622	27969	38029	66161	40595	30071	33476	37059
54027	15.0075	30079	50457	45207	37709	50276	32404	32168	23484	39468	40924	42131	41076	79545	71302											32864	37894	41663	30375	39553	54753	52757	39110	53943	37502	39667	64236	35700	47115	34333	34729
55828	15.5078	28240	45241	37569	42025	56492	35451	31645	26510	41874	39515	38848	41705	70571	81216											35350	42080	37029	41430	42928	60742	57361	45697	47123	34860	45929	57180	32949	40122	32392	41798
57629	16.0081	31425	58058	40608	40595	60987	32696	32096	25822	39890	41540	43557	43739	75763	78363											33645	42182	45697	31885	36329	62776	52934	43903	63688	39675	40675	70753	35185	37620	33877	39557
59430	16.5083	28535	60088	44971	39510	53994	34691	32295	26083	41118	32573	45376	41675	80574	80194											33607	42232	41608	37510	36848	62050	58572	35780	56315	34244	40574	58750	38612	39223	33565	39409
61230	17.0083	30522	55648	46119	41992	54618	33008	35814	24877	38882	36312	45900	39160	66469	82187											30898	35561	53112	40553	30826	46199	61227	44026	62367	38384	42561	62198	36649	35881	27564	40439
63031	17.5086	31472	47119	41616	43798	66089	33907	31261	32687	39101	34269	45203	38299	77919	72880											28775	41232	38738	39802	33653	61130	52639	42025	46819	37637	41494	64266	37645	33556	33847	37730
64832	18.0089	32560	51288	41937	38536	65456	31442	32231	26265	38122	33577	47794	39692	75260	74923											35109	40367	44300	32185	36527	61168	50985	37350	54243	31164	39477	56087	32522	34143	32025	39620
66633	18.5092	32788	53774	43038	38789	58741	31632	33037	28294	38114	35219	42397	39177	78928	66816											34540	38282	37873	29556	31058	50465	53960	40819	57543	33004	41916	68288	37662	34472	27383	38084
68434	19.0094	33345	47203	43832	37046	49752	30603	32392	28185	42388	36957	48056	39658	69064	77021											37274	42793	43920	29763	33189	49482	40561	44579	49495	28991	35569	65190	34767	29535	26640	31708
70235	19.5097	31223	47583	40949	39574	47448	28467	29822	27134	36430	37337	42861	34261	69432	75265											29640	40270	33518	30197	31333	48339	42456	38806	44473	29624	35586	59391	32489	31641	25349	36531
72036	20.01	27425	41793	32923	34776	55517	29143	29438	33004	34535	34594	40629	33185	71500	65207											28704	32898	32598	28100	39823	42642	42131	42173	53812	31691	34442	51559	33096	30632	22079	33649
73837	20.5103	27396	43730	33050	31961	56040	27830	27839	26147	36936	38582	43173	33995	67288	50660											25126	32746	38658	24872	32632	44840	42604	35075	47891	28341	31434	54462	32012	30556	26788	32409
75638	21.0106	25294	39633	33809	34442	43604	24185	28045	28337	31691	30573	38160	33105	66296	54521											23796	35434	30062	21678	37337	46570	46642	30442	49077	25898	34556	49870	28746	31763	22552	32649
77439	21.5108	23547	40063	34561	34341	47377	25691	25079	25235	29083	26505	36173	32658	52014	54981											25666	29442	29539	24687	28248	44697	36801	26978	38228	24817	29965	47478	25117	28746	17615	32480
79240	22.0111	21573	34607	29624	32316	39050	24851	25020	23868	32400	31282	36021	35194	51394	65106											23294	21155	39916	25383	31451	33831	34691	24134	34185	21720	27986	47127	26526	28193	19750	30691
81040	22.5111	22353	34949	23817	30438	43367	25282	21817	19573	27248	30126	32050	30721	38709	41515											21729	20792	26758	20568	24961	34033	31349	24674	28560	21556	29370	42498	22142	23282	18568	28210
82841	23.0114	22261	34122	29548	30003	50090	20974	23691	20796	26024	22007	29054	24282	33615	38688											20104	28362	18286	20176	19366	38561	34354	19944	33628	17455	23682	36877	19417	22893	18252	25522
84642	23.5117	20286	30109	25704	28012	43422	18834	20531	15193	23092	24758	27041	24775	36316	29645											21142	20653	24767	23459	21121	27839	29071	19514	32501	16864	21644	30383	19349	18248	14809	17868
86443	24.0119	17117	25130	25868	25775	34506	17480	20623	13037	20687	23366	24539	21159	26450	28299											14737	19353	22113	20543	17940	23125	26628	20324	28202	15092	19509	32539	15370	20695	12518	20400
88244	24.5122	13670	22910	17404	18214	30151	13965	15742	10666	17640	17442	20176	19927	22543	21505											11636	13602	15636	14067	12248	16594	21311	15332	17446	11446	17155	23332	12619	17210	9628	15687
90045	25.0125	13007	17881	13830	17239	22682	11480	13548	9911	14480	14780	16214	17661	19446	18113											9214	13341	11809	10227	10902	20408	16737	10750	17847	9940	11016	20750	10075	12252	9333	12041
91846	25.5128	8438	15130	13839	12459	18189	9400	11556	7147	11100	12164	12780	11851	15425	17678											6970	12986	10535	7261	9822	17400	14007	9349	14218	8759	10408	15598	8139	10227	7852	9050
93647	26.0131	7759	13071	11522	10062	15851	8130	10522	6911	9219	12286	11396	12151	14725	12991											5970	10138	10805	8324	8463	13383	12008	9611	14552	7071	8687	15885	7198	8206	6210	8573
95448	26.5133	6375	11430	8966	9143	12784	6480	8666	4734	8379	8755	10923	9628	11708	11868											4924	8240	7071	7012	6632	7873	11813	7400	10489	5978	8244	12155	6177	8328	5540	6350
97249	27.0136	6700	10995	7881	8088	11932	5852	7105	5417	7911	7742	9687	9084	10573	11552											4780	6603	8050	7772	7004	9282	10337	6898	9421	4877	8042	11607	5548	6480	4038	5426
99049	27.5136	5443	9274	7843	7219	10733	5514	7206	3582	7261	8539	7734	8295	8632	9404											4114	6936	6687	7371	6586	7088	8679	5772	9472	4519	6826	11164	4746	4970	4675	5008
100850	28.0139	5742	9738	7113	6713	10674	5713	7514	3822	7683	7164	8607	8282	7750	7653											3831	6700	6232	5021	5033	8700	7594	5755	8852	4514	7206	9383	4687	5641	4244	4865
102651	28.5142	4367	8708	7248	6502	8894	5898	6075	3679	6405	7021	7341	8387	7708	7101											3055	6037	5396	5059	5616	5603	7193	5000	9012	4434	5628	7978	4270	5375	4042	4692
104452	29.0144	6050	9096	7447	6919	9231	5759	6476	4350	6540	6299	7577	7278	8096	8223											3730	5978	6535	5341	5151	7164	7489	5502	8155	3886	5384	9619	4257	5000	3877	4152
106253	29.5147	4881	7780	6316	6552	9244	5459	6097	3253	7215	6198	8312	7371	7704	8413											3472	5008	6320	4468	5805	7885	6780	5759	7261	4067	6130	9603	3941	4776	4464	4350
108054	30.015	5649	9425	6375	6270	10316	5759	5974	4451	6016	7168	8670	7750	7653	7320											3709	6907	6143	5240	5303	6683	7966	5033	8451	4101	6696	10041	4358	4637	4654	4932
109855	30.5153	5502	8468	7434	7780	9995	5742	6734	4375	6826	7459	7430	8940	7417	7379											3409	5641	6620	5485	5708	6168	7358	5594	7944	5025	6227	9784	4945	4540	4017	5071
111656	31.0156	5864	8641	8079	7464	9531	6181	6966	4641	7118	6147	7961	8282	8354	8485											3730	5700	6653	5708	5409	8573	8409	5911	8552	5000	7497	10054	4282	4894	4460	5295
113457	31.5158	6991	9155	8139	8396	9552	6215	7472	5080	7712	7008	8712	8223	10455	8999											4029	6881	5915	6459	7645	7282	6974	7506	9358	5194	7219	11265	5468	5059	5409	5949
115258	32.0161	7206	10472	9198	8928	11286	6822	7915	5556	8455	7480	9506	8864	10160	8906											4852	7725	9303	7329	7590	10012	8653	7582	10261	5848	8316	12607	6080	6438	4881	7607
117059	32.5164	8383	11290	9274	9168	11826	7814	8801	6632	9320	8198	9130	10662	10750	11088											4903	8620	8814	7206	9025	11851	10286	8759	12737	6185	9560	13041	6949	6704	7025	7818
118860	33.0167	8953	13362	10354	11121	13088	8873	8801	6244	10906	8818	10425	9902	14687	12839											6670	10122	11527	10088	10147	11396	12716	11813	16286	7122	9712	14067	7092	7164	5147	8860
120660	33.5167	10138	13105	12290	11889	12628	10784	11459	7911	11936	10645	13016	10738	14893	14172											6438	9957	12126	8881	9826	12885	15429	11311	19294	8666	10408	16813	8430	8628	6582	11008
122461	34.0169	12130	16649	12978	12349	15936	10818	12273	7004	12307	9489	11927	13455	17079	15244											7645	12421	15126	12708	12451	12379	14404	14282	17341	9075	11619	16391	10586	12033	7400	11995
124262	34.5172	11282	14813	12290	11349	15193	12164	11050	7852	10894	8944	12029	11370	18151	19138											7514	11733	15661	10122	12370	14569	14269	12134	14978	10978	11860	16531	11674	10438	8058	13788
126063	35.0175	13843	14488	11683	10586	15682	14231	12754	8417	11109	10898	12708	11522	17125	19239											9324	10708	11375	10556	14936	13404	16898	13552	13269	12197	13577	14775	12691	9708	9843	12480
127864	35.5178	14050	14303	12214	11033	12075	13113	12206	6978	12206	11674	12143	10927	14033	20564											10417	15400	13408	14733	14965	15944	15472	15978	18961	13484	12235	12856	14455	13877	9510	14872
129665	36.0181	14839	18358	10944	12016	14396	16261	16029	8721	14210	11193	14210	9995	19286	22024											12223	16602	17425	17176	16379	15109	16277	17552	25180	13463	12944	17784	13666	15007	11067	16780
131466	36.5183	18362	17265	15446	18826	18670	18763	19003	12370	20649	13953	20653	22054	20708	20518											14729	19687	21889	18779	21307	24704	19514	18214	31084	15796	16826	27577	18488	17362	15839	19839
133267	37.0186	21353	21518	22231	23653	25024	26856	25801	16569	27978	16809	25953	30307	25062	31843											17396	24931	17438	17509	25995	27248	20978	20581	37299	20227	28429	35451	20155	23387	19083	21476
135068	37.5189	27586	29860	28105	27463	29058	26088	26716	15830	29404	25062	29425	28590	23438	34527											18100	25910	26463	21041	25041	28337	21083	27016	40895	20007	26560	33805	23172	22130	19260	25898
136869	38.0192	28337	37869	29396	30691	34607	30965	27349	16978	31565	29657	34510	31683	35037	35485											21573	28940	36839	31459	26818	23978	43604	29683	44638	18678	39472	43034	23653	22505	20957	31278
138670	38.5194	31480	45845	36561	36801	37084	29172	30843	15497	34164	28560	34417	33219	40819	35932											24163	34075	35063	31320	30721	41764	44068	38772	47857	28303	35337	46456	29543	16817	23016	35519
140471	39.0197	34345	49111	35759	34666	52588	32565	36599	20455	43452	31425	40675	37637	45110	43161											23058	33261	32818	31101	39591	55196	37152	33894	46026	25024	41789	51791	30451	26404	26358	33231
142271	39.5197	32548	41439	36552	38046	43363	32970	35354	23712	37924	35620	45494	35780	31700	41211											23830	36168	38316	28332	32763	52947	31341	35666	47174	28007	41582	50107	29991	32075	28045	39848
144072	40.02	33839	53449	39861	42270	39591	34776	38620	22737	49022	30906	41135	36046	56049	43578											26366	36962	44528	32430	38717	50119	49077	44650	52736	29982	38873	53445	35447	33556	27168	38249
145873	40.5203	33316	50238	41464	37219	45397	36776	39299	25438	45655	35729	42329	40017	51225	42405											24467	45494	44532	39599	44144	45001	50976	35168	50546	32349	47879	50546	28898	24518	27746	36506
147674	41.0206	36738	47123	42819	40021	52010	38553	35426	21100	45958	38316	43190	38050	62569	44827											19644	44756	37991	35856	34392	49575	51896	37523	55378	31645	37882	47423	32345	16299	35772	45845
149475	41.5208	34189	46245	47558	44397	59902	38582	40279	21801	43789	39903	44768	38257	65806	47220											26657	41498	41890	31649	42435	44583	53213	38958	59404	32940	44773	55053	30864	13758	28995	43338
151276	42.0211	37671	55783	43865	42410	51542	36211	40422	20058	38629	34215	46499	38017	76286	50706											22336	39700	37730	26383	38683	50634	50938	43768	53694	31776	42844	51774	32176	17239	33088	42194
153077	42.5214	35075	53015	45781	41312	61717	30649	41840	24442	43418	26923	44925	36658	69005	45423											23611	36649	43009	37616	43992	43612	49976	39738	57218	28218	41257	44410	30176	41637	29164	36156
154878	43.0217	40549	47604	42080	40511	54108	35286	44076	22843	47123	30641	43975	49643	67739	46980											19982	46305	37548	30860	40688	46634	50187	39970	57804	38953	44026	56783	34615	34383	28957	39173
156679	43.5219	33991	46604	40582	39287	60476	36675	38797	25391	44279	35523	44629	36400	68495	51394											23282	39131	46887	32252	36012	42519	50238	38194	55914	31923	43296	49402	29514	31468	28176	43549
158479	44.0219	36852	54192	41578	33409	57783	29898	36856	21653	38633	31577	42464	35198	72795	39388											23602	40570	50018	29982	36759	46507	50217	41447	51390	32206	36687	42426	30248	27332	31902	34151
160280	44.5222	37637	46655	43481	38527	54779	30666	35641	22130	41772	29868	43338	34548	58889	47237											21885	35240	40135	29839	39312	42869	51516	42410	55217	30311	50280	46381	30041	28151	28037	40274
162081	45.0225	27286	41840	36249	32345	46410	26387	31704	19442	31868	31447	38510	31037	59353	39662											19244	31029	37088	28349	31024	43815	45975	36801	48360	32299	33734	39460	27484	34046	28206	35700
163882	45.5228	27860	44503	36257	30868	49103	25256	30649	25349	33147	30438	32303	29780	55538	39671											22261	35653	32890	27277	39970	43827	44933	32147	42895	26868	38464	37025	23889	29282	23881	37464
165683	46.0231	26813	33489	34641	26961	47161	27383	27366	20653	28619	27982	30780	34341	46887	32210											16771	26277	35312	27910	29062	35480	40755	35206	43384	26548	39392	37350	22860	30244	22290	25986
167484	46.5233	22590	35586	31269	28607	41515	25016	29860	15898	25906	24636	33911	28143	41139	32198											18045	21260	31476	19429	25320	29143	33387	25286	37333	20294	27256	30446	23341	28788	17214	19674
169285	47.0236	17708	28206	27775	26784	28202	23016	25180	11624	26117	18117	26290	26007	30522	27784											14784	20176	26898	19640	22007	26358	31944	22590	32105	17801	22632	29147	18151	22396	14501	17261
171086	47.5239	16872	25185	21341	21450	29801	22332	25396	12096	20396	15480	22324	18387	22332	24763											13708	15337	16484	17412	19661	28704	29894	17872	28602	16307	24729	22244	13653	21290	14788	20615
172887	48.0242	19425	32231	18235	25640	30024	20590	23746	10611	14210	13847	18636	21990	24147	18109											11586	16666	17121	13737	20817	19543	21050	15349	24484	17341	22556	18450	14893	21459	13704	15164
174688	48.5244	11514	19391	16374	14839	22978	12261	12965	9134	14885	12282	15083	16391	22433	15286											11653	15180	15282	11607	12505	17126	19990	17915	23206	12341	14210	13450	10181	12370	10219	12763
176488	49.0244	9404	13927	11611	11075	14674	8928	10953	8324	10974	10991	12628	11172	16168	9826											8978	13417	14594	11311	12231	14299	16358	14408	17467	9569	11632	13016	8776	11691	8215	11273
178289	49.5247	8177	11763	11269	10607	13235	7447	9556	5852	9400	9573	11970	9299	13303	8088											6544	11902	12847	9240	10354	10223	13750	9666	14653	7712	10919	9915	7839	10058	7615	9780
180090	50.025	6653	10501	8885	9539	12847	7928	8409	4713	8193	7708	9704	8033	10138	6063											4873	9552	10008	7704	8333	9147	11012	7966	11991	7274	9455	9919	6518	8594	6729	7928
181891	50.5253	5793	11088	8341	8168	12121	6168	7721	4675	7282	6856	7447	6653	10252	6430											4046	6776	8721	6599	6890	8510	8725	6527	9079	6843	7978	7050	5544	5801	5122	6911
183692	51.0256	5181	9299	6810	6949	9409	6172	6548	3877	6784	5637	7337	6599	8455	4907											3396	7320	8227	5485	5362	8999	7244	5915	9463	5312	7071	6092	4519	5999	4721	6253
185493	51.5258	4573	7615	6248	7096	9185	4759	6345	3725	5173	4865	6379	6274	8244	5282											3337	5050	5991	5181	5983	6540	7506	5139	8560	4282	6278	5455	3962	5084	4358	5540
187294	52.0261	4046	6485	5683	6514	8290	4447	6101	3046	5189	4839	5649	6219	6291	3869											2650	3882	5624	3126	4055	5565	6067	4616	6852	3565	5919	4514	3649	4485	3455	4088
189095	52.5264	4130	5890	5565	5459	7303	4413	5679	2561	5206	4535	6012	5054	7008	3633											2388	4168	4708	3519	4215	5434	5911	4409	5599	3177	4793	4599	2852	4489	2742	3683
190896	53.0267	4076	6101	5320	5831	6341	4173	5223	3076	5350	4320	5784	5295	5974	4346											2080	3375	4666	3865	3616	4346	5485	4287	6143	3253	4033	4038	2671	3898	2894	3898
192697	53.5269	4029	6092	5189	5468	6666	4135	5772	2266	4721	4877	5139	4911	5953	3582											2177	3350	4768	3274	3628	5059	4468	3612	5848	3426	4670	4219	2738	3430	2877	3375
194498	54.0272	3544	5202	5232	5856	6603	3903	5367	2709	4886	4139	5632	4865	5928	3822											2131	3396	5206	3898	3185	4763	5084	3620	6160	3603	4502	4177	2439	3472	2544	4379
196299	54.5275	3747	5544	4915	5130	6923	3523	4772	2785	5088	4059	4839	4586	6113	3169											2042	2772	4198	3582	2763	4320	5388	4071	6092	3253	4168	3084	2274	2785	2329	3392
198099	55.0275	3430	5620	4936	5286	6244	4211	4540	2460	4936	4751	5248	5046	6274	3814											2283	3856	4620	3675	3498	4447	4873	3932	5540	2692	4793	3683	2704	3143	2658	3624
199900	55.5278	3915	5818	5384	5645	6291	4350	5455	2700	4987	4498	5451	5270	6755	4185											2607	4316	5092	3704	3489	4392	4806	3742	6021	3291	4447	4012	2683	3004	3055	3190
201701	56.0281	4865	5818	5911	6046	7518	5029	5987	2898	5991	4481	5337	5265	6772	4573											3055	4223	4797	4059	3839	4696	4717	4101	6957	3177	5227	3392	3076	3582	3329	4409
203502	56.5283	4198	6797	5261	6362	6864	4860	5594	3447	6194	4358	6113	5687	7869	4557											3358	4422	5261	4190	4434	5194	5738	5101	7134	3548	5481	4557	3607	3772	3704	4734
205303	57.0286	5519	7345	6510	7088	7409	5535	5594	4227	6814	4881	6257	6725	8518	5375											4333	5776	6801	5831	5430	7451	6164	6206	9788	4303	6109	5544	3603	4780	4384	5430
207104	57.5289	6050	8177	7535	6923	9476	6738	6670	3903	6510	5966	7447	7316	8560	6139											4206	5974	9240	8193	5396	8362	9594	6518	9784	5755	7590	5962	4249	5527	5223	6400
208905	58.0292	7421	9425	8839	7350	10341	7160	7759	5101	8189	6261	7982	7371	11248	7485											5734	7333	8607	8835	8215	9915	9725	7021	10906	7012	6611	8054	5232	7046	4797	7497
210706	58.5294	7784	10484	8358	7548	8835	8105	8430	4932	8029	6480	8033	7248	13796	8430											6097	8189	10168	8033	8451	9202	10345	7539	10556	6527	10687	6337	5729	7447	5324	8004
212507	59.0297	9181	11109	9046	8641	6953	8987	9413	5139	8539	7219	9974	8025	12619	11349											7088	10847	10214	8328	9299	11429	12674	8480	11176	7928	8518	7636	6611	7729	5864	9843
214308	59.53	8497	9683	8944	8569	11273	9940	10624	5358	7139	6552	8252	9527	12109	13965											8447	9328	7919	8982	7907	11345	12860	10130	14547	6881	7691	8333	7788	8767	6135	10172
216109	60.0303	7902	9657	11265	7434	10041	8539	10408	4915	6877	4966	10033	8181	9674	13320											9164	10615	11497	12480	10506	13218	10771	12256	15898	8468	9122	9012	8236	11826	8497	13387
217909	60.5303	9046	11750	9949	9619	13514	11261	13771	5455	11278	7712	12674	8215	14746	14598											12543	14649	14957	15092	11763	17843	12932	16670	19978	9193	11054	14172	10792	12598	12404	13885
219710	61.0306	13640	14020	15223	13944	16670	16847	18446	6810	15864	8662	17758	17758	18024	14180											11223	17341	23248	16518	16953	21666	16151	17159	20526	13902	19100	14784	15611	17062	13290	18602
221511	61.5308	16028	18581	20556	19952	18438	18358	18185	11269	22138	18227	20341	20547	25712	19826											11801	16678	18062	19282	17071	25353	21704	23602	22459	13645	20864	16737	14484	21277	16028	19695
223312	62.0311	19758	25927	22366	22940	29889	21784	21615	14472	20936	20024	24239	24514	21189	20003											13400	20733	19936	19223	17109	25353	23168	22450	32231	15138	27543	18387	15775	16315	16543	21632
225113	62.5314	18552	27223	29379	24269	33265	25543	24294	12851	25117	18556	22733	24206	27434	25442											17286	25163	23746	20687	20893	30725	24953	18775	33809	16463	26780	22256	15855	22235	19623	21151
226914	63.0317	19265	33902	24138	25531	31425	23463	20855	11729	25632	22307	25345	24771	38498	23898											15678	23104	22952	22442	17379	25691	22653	15847	29467	18657	24045	21425	16176	19172	18860	17379
228715	63.5319	20467	34383	30615	26830	39645	24227	25953	14391	30278	25501	29349	26885	37177	28813											19269	24269	25552	24763	23779	33708	25244	27138	28273	17919	29526	21602	18931	20796	18653	23396
230516	64.0322	20957	35894	31687	25071	35531	23434	27218	14159	26493	20509	29721	29712	36561	31944											18809	25041	28299	23341	20476	30640	32396	29754	34455	18320	24362	21974	17463	23889	19839	26699
232317	64.5325	25391	36679	27636	27598	42304	26767	26636	17864	27978	20539	32788	27202	38405	35860											17931	26180	32067	19218	21497	34080	28033	28417	35046	19307	31312	21619	16965	24379	20307	24653
234118	65.0328	18303	38354	34738	26999	37671	29235	27944	13771	27421	19687	31404	31560	46735	24805											17796	28003	28885	23691	22096	30075	31252	27071	31189	17151	27518	20396	17919	24657	19125	24168
235919	65.5331	20176	36000	33561	29801	39460	26493	29071	17121	28683	22037	30506	25877	53989	31290											18573	30814	31164	23969	24649	30746	29003	26742	33932	19277	30556	25088	19535	29510	19881	26902
237720	66.0333	20391	41274	31788	29531	42920	22877	27366	13602	28721	27552	31134	25320	47849	36637											16948	27328	26585	26716	27429	25931	32628	25872	31927	16666	27953	22767	18779	30189	20906	26678
239521	66.5336	21138	35552	29965	30771	35345	25796	26801	15071	26349	22476	33826	22902	44570	34801											18944	32780	22518	31003	19071	24691	33725	31915	33801	23619	25991	24877	19893	23134	21151	26501
241322	67.0339	21277	35198	28235	30121	43967	23383	29024	16303	31683	22320	30695	25729	39194	36320											17910	27611	29151	23126	23455	31598	33282	25417	35168	20758	29408	24704	20383	26999	17522	29674
243123	67.5342	24016	36375	32742	31619	43460	23125	27459	17729	24746	22864	34084	24501	23868	30683											27227	25092	35649	26383	22577	31755	32594	26581	33860	19109	24303	25923	15944	30358	16362	28029
244924	68.0344	18919	35337	29522	27273	40067	26649	27472	15058	27075	23366	30885	26400	41620	33611											20682	29105	32945	24028	23277	31506	33611	29155	31712	18290	28265	26007	15484	23417	18244	24767
246725	68.5347	18957	36282	27902	27974	36038	23830	26573	16767	27176	24109	31860	24978	36561	29493											18623	25906	29868	22239	22716	30126	31324	27227	27636	17817	31362	20488	18050	19408	18872	23999
248526	69.035	19826	33215	29518	27712	35383	22737	23526	16590	24543	22277	28248	28590	31636	30261											23176	26029	26189	22189	23147	29700	30020	26653	31746	18552	24661	24303	16075	21366	17083	24459
250327	69.5353	17788	30944	26104	25159	31311	19417	22298	13442	22737	23298	27484	20298	36481	27843											20450	26856	29008	20957	23779	23691	27041	24716	30645	15168	23526	20438	17493	25396	17830	22303
252128	70.0356	21687	27564	22206	26104	35354	21885	24974	16421	25286	21501	26771	22505	31425	27750											19505	22590	25826	23024	21054	24400	26683	24687	26185	17016	24746	17206	17640	23218	17573	16320
253929	70.5358	19784	25341	23109	22206	27197	20986	21898	11012	20096	18910	22893	19366	33020	23033											15645	19417	18948	22045	16269	26480	25400	20923	25611	16387	18826	17910	14176	21547	13227	13611
255730	71.0361	16092	22075	19374	20919	29109	16974	18931	11328	18265	16547	18775	15083	24273	22117											14463	16387	21805	14421	15261	14712	22117	14801	20189	16467	17450	15526	12548	21374	10235	10586
257531	71.5364	13889	20893	16974	15505	26007	19611	20429	9231	17535	15404	16488	17303	15277	16931											13670	11873	18948	13552	13197	15893	20585	16931	26775	13788	19256	11607	14109	13307	9518	13147
259332	72.0367	12391	21729	17471	19742	25594	16602	19628	12016	17193	14851	17999	15704	16636	18817											13725	15147	17134	14050	15138	16569	17066	20556	24632	12602	13729	12586	10569	12138	11092	15016
261133	72.5369	13189	19535	19016	16720	20623	15434	16851	9717	14054	16163	17328	16695	20775	16463											15459	14404	18463	12927	12569	18754	17484	17885	25290	12159	16121	14202	11771	17201	12100	12986
262934	73.0372	9780	16391	14704	13050	18459	12763	14623	9864	13813	14936	19125	12809	18324	13117											13678	13940	13910	12248	13113	13805	16054	15054	20096	11332	14674	12586	11016	15037	9666	12290
264735	73.5375	8788	18349	12834	15733	18657	12413	15497	7725	12678	12003	16062	12708	16307	11670											10847	12096	14763	14067	11168	14961	17151	14881	20269	10822	14404	13767	9586	12489	9649	13210
266536	74.0378	8835	14792	13539	15577	14809	10940	13282	7497	13915	11012	15754	13007	16425	11008											8096	10003	12033	11590	9712	13889	15088	13860	20919	9202	12328	11581	8755	8552	9662	10126
268336	74.5378	8417	14788	13885	11332	17547	11839	11590	8307	10851	10725	13834	12256	13864	10354											8164	10484	15374	13320	10581	12902	15623	12383	18552	9624	10337	10387	7890	11898	8172	9611
270137	75.0381	7919	12429	12261	11640	15421	9029	10974	7869	11202	9624	12889	9898	16180	8586											6552	9569	14763	9674	9687	14358	12830	9860	16201	8658	10548	10126	7063	10366	8286	8151
271938	75.5383	6413	12839	10906	10210	12809	8594	11936	5459	11138	8468	11337	9818	12341	8004											6928	8252	10999	8442	8556	11860	12185	11729	14315	7413	9915	7215	6388	8463	5801	6586
273739	76.0386	6742	13240	11543	11856	13518	8674	11961	6442	11054	8755	12332	9624	15822	7071											5742	8350	8683	7193	7506	10012	12379	9788	14438	8181	8151	8468	5426	8839	6523	8485
275540	76.5389	6590	13391	10856	10708	13488	8219	10265	5531	10176	8814	10738	9176	12712	6459											5126	7215	10868	7392	8316	11522	12130	9168	12569	6873	8721	6666	5856	8830	6717	6451
277341	77.0392	6050	11493	9252	10678	11725	6637	9501	6029	9970	7687	9771	10122	13746	6742											4147	6101	7485	6641	6995	12944	8531	7603	11455	5476	8392	7358	5021	7092	5493	6928
279142	77.5394	6561	11075	8974	9480	10864	8345	10451	5565	8248	7704	8974	8890	10434	5527											3607	5746	7599	6675	5270	12328	9063	7852	11472	5519	7042	6400	5076	7396	4776	6607
280943	78.0397	5468	10062	8177	8501	12404	6037	9349	4489	9172	5029	9244	8902	10092	6666											4831	5616	7075	6721	5915	7991	7506	6506	10636	6143	7333	6970	3962	6649	5185	6662
282744	78.54	5358	10425	8966	8649	12594	6434	9282	5337	8776	7923	8202	9354	14252	5177											4721	6421	6405	5894	6421	11189	10181	8189	11100	5721	8219	5818	4430	6029	6143	6826
284545	79.0403	4472	9084	7636	7383	10160	7088	9695	4455	8611	6367	9096	7134	9940	5097											4177	5936	5299	6991	5447	8392	7953	6978	9476	4460	6637	6350	4422	4919	4362	5645
286346	79.5406	5232	9459	8683	8008	9556	6873	8501	5071	8320	6299	9147	7531	9560	5143											3738	5776	7413	8008	3742	7603	8695	6206	11041	4506	6708	7717	4375	6223	5392	6755
288147	80.0408	4388	9185	8375	7869	9425	6658	7852	5417	7801	5510	8046	6409	8033	4860											3725	5421	7565	6126	4130	8514	9552	6966	9544	4616	8025	6649	3763	7506	4915	6080
289948	80.5411	4253	8594	7683	7683	10746	7535	7333	4561	7577	6624	7544	6907	8067	5164											4206	6021	7400	7679	5928	7907	10307	7134	11100	4941	8434	7641	4341	6379	5392	6160
291748	81.0411	5367	8957	7565	8269	11050	6666	7704	3856	8037	7206	8552	7641	9003	5616											3941	5708	8915	7160	5869	7210	6928	6848	12421	5253	8590	6772	5253	6151	5734	6071
293549	81.5414	5016	7763	9210	7084	10598	7620	9088	4742	9303	6810	8860	8396	10295	5721											5227	5464	10219	6772	5413	7269	7615	6822	12417	5603	8312	7628	5160	7636	6240	7092
295350	82.0417	4738	7025	7223	7172	10514	6253	8185	4346	6788	4865	8122	6295	10577	4928											5405	6738	8670	7160	5666	7080	6164	7767	9733	4983	6877	5573	4894	7873	7151	6151
297151	82.5419	5649	6784	8839	5632	9822	7788	8358	5784	7949	5253	9189	7514	10273	8434											6788	6814	8868	8286	6160	9552	8215	7261	9860	6080	7042	6075	5789	6337	5713	7531
298952	83.0422	6042	7206	8252	7826	7809	7801	8269	4978	6434	7379	7379	9333	9050	6675											7835	6122	11113	8480	5843	9856	9349	10172	12130	5679	9054	7261	6113	8805	6687	7375
300753	83.5425	5742	7210	9240	8025	10965	9033	9029	4544	7658	6392	9316	9704	7442	9155											8147	8198	10645	7307	6151	9409	8742	9641	11193	6961	9577	10054	5696	9679	7185	7594
302554	84.0428	6637	7042	6776	6071	8890	8497	8312	4384	7202	6312	7438	7788	9442	8987											9286	7940	10341	9725	6953	7586	9295	9037	13484	7489	9008	9594	5485	10134	7244	7953
304355	84.5431	6160	5316	7932	5742	8257	7843	9936	3346	7092	5670	7084	8877	7957	8084											9172	8809	10459	10598	7244	10463	10126	10700	12294	7734	7721	9016	6270	11413	7831	9421
306156	85.0433	6143	7261	6902	6628	5493	8636	10738	3417	6092	4257	7772	8978	9695	9012											9666	9105	11442	9805	8885	9109	8801	11932	15526	10455	8738	11383	7189	11780	9409	8902
307957	85.5436	6459	7037	8717	6240	6793	8919	11240	4287	9695	3945	9058	6843	10130	9649											9451	10029	13429	11341	10079	11261	11514	11729	15391	6734	10084	12117	7054	12750	8227	10337
309758	86.0439	9624	10556	9463	11716	13324	12113	10851	7033	10628	8316	9514	9244	12733	9155											8506	11721	14843	12737	9493	14337	17746	14556	13619	8067	13602	14079	8400	13197	8383	11615
311559	86.5442	10404	12337	11666	7793	15450	10446	12598	8155	10328	7071	10641	13548	12687	10662											8096	11729	13311	10691	10927	11864	12856	11948	11936	9054	13488	14619	7590	12510	10700	10552
313360	87.0444	10868	12763	15012	12948	13543	12029	12957	9725	13809	12311	12640	13294	20813	12442											8067	11759	14412	13750	11041	11379	13792	10020	18223	8396	14020	12417	8632	13438	10738	7982
315161	87.5447	12088	16594	13742	15893	15159	13953	13214	7822	13767	12898	19260	13438	15362	13737											9792	13096	17016	13822	12248	14307	19998	13632	13965	9476	13699	14180	10303	13636	12737	12501
316962	88.045	12708	15109	15227	13189	18024	12349	13759	8573	13455	12278	16096	15522	16931	14155											8843	12636	13429	15012	11143	17142	12839	15505	16421	12316	15834	13902	9514	13915	13522	15632
318763	88.5453	11430	15408	15307	15699	18805	14670	15083	7780	13649	14366	15223	15054	16699	15379											11294	12193	15206	13041	12514	14539	15294	14978	16307	10653	15792	15121	9700	13041	9974	14379
320563	89.0453	9577	16775	15931	14067	16189	14244	14142	7902	12510	13223	15126	12041	14434	14071											11054	15290	13721	14442	10923	14552	15526	14712	19050	8793	15066	15602	9480	11400	10767	15543
322364	89.5456	10046	15645	15758	13948	15113	13847	13358	8539	17682	11303	15982	12986	15915	15708											12472	12501	14493	14459	11185	14661	13370	16450	16505	10535	14020	15497	9337	17349	12526	14218
324165	90.0458	12223	18265	13965	14877	18961	13822	13923	7269	13037	12324	16096	15569	23547	17130											12708	12181	15265	15362	9771	14142	15151	15273	19813	11349	15324	16712	8008	15716	13341	15231
325966	90.5461	10366	15834	15016	15362	18180	12818	15033	8350	13341	13096	15185	13856	19619	12822											11662	12121	14674	15645	9206	14450	11868	18244	18455	10877	13535	16079	10611	13041	11088	19079
327767	91.0464	11649	16936	17012	15455	21442	13050	14261	8987	13391	12522	17075	14075	17163	16066											12033	12860	14180	15531	10539	13813	17138	15387	18877	12121	17075	13750	10868	12607	11227	15543
329568	91.5467	10856	18033	14792	14775	16138	14425	15889	7050	14328	11016	15708	15071	16585	20995											12151	12311	14526	17552	11510	17349	15231	14699	18868	10805	16915	15813	9063	15387	10818	14573
331369	92.0469	10400	18649	16531	14927	18016	13244	12805	6928	13197	12256	16007	11147	12252	17826											10366	11586	14450	16037	13531	15535	18851	14337	18628	10780	17256	14501	10944	15185	11429	15653
333170	92.5472	12970	16505	13193	15041	16763	13417	14096	7725	15358	14261	16358	13425	20826	16948											12666	14501	11898	13476	12476	14670	15581	14598	16273	11100	13742	14273	9746	14071	13261	13767
334971	93.0475	11425	18050	14805	13818	18408	11961	14670	8193	12970	11193	15066	14041	17754	18037											12218	13197	9438	14564	10645	17058	16919	13484	18214	11510	13775	12526	9282	13117	9451	11948
336772	93.5478	10953	16223	15033	13041	17075	12307	12531	9003	15400	11535	14299	15252	16417	17193											12020	11467	9514	11986	11185	13881	16543	14780	16374	12569	14455	13602	8936	14003	9151	13396
338573	94.0481	9944	17012	13906	16159	20037	12775	13564	7687	12113	11037	14569	13375	20687	15957											11079	10480	12830	13058	10552	14965	12775	12370	16020	10396	17573	12784	9472	11514	9860	12864
340374	94.5483	11442	15366	12733	13953	16999	13611	12197	9434	13801	12539	15045	11704	19573	17151											9337	11328	10843	12991	8788	14969	14294	8898	16138	9822	12029	11995	8514	13286	8020	12109
342175	95.0486	10202	16214	13860	10206	14265	12455	12493	8455	13472	11337	17974	14147	14531	16045											11134	9400	13434	10927	6881	12809	10776	7784	14417	13033	12809	11463	7067	9383	7295	11231
343976	95.5489	11927	14434	11839	12695	16408	11746	12628	8518	11573	10354	16218	13796	14029	14067											10657	11282	12944	10889	12248	13231	10062	11159	15265	9725	12164	12813	8345	9594	6974	12067
345777	96.0492	8565	12953	8873	13518	13758	13581	12746	7004	13071	10700	13375	13058	14290	13294											11248	9974	13117	10624	9704	12965	9172	11932	15138	8096	13805	9409	7738	10974	7299	11240
347578	96.5494	9982	14180	10628	14176	15577	10759	11674	6080	13953	10354	12577	11181	11645	12645											7923	14526	10058	12100	8333	10860	10265	10961	12894	11164	11261	10286	6472	7911	7510	9738
349379	97.0497	9822	16345	13577	14383	16197	11868	12645	5485	11219	10632	16261	10704	10463	11113											7957	11653	11421	10873	9957	13535	8725	12185	12535	8535	11341	11687	7426	6434	6160	10666
351180	97.55	7826	13721	10324	12923	11873	11024	10729	5265	11868	9366	11771	9923	7101	11577											5772	9290	8662	9847	9278	10624	8506	11029	14303	8295	10316	10290	6189	7902	6620	9717
352981	98.0503	8333	11138	10020	12033	13771	9953	11387	7493	9919	8012	11822	10885	11455	10278											6826	9864	9400	9193	7253	8974	9160	10193	10738	6510	10345	9898	6801	9109	5354	9274
354781	98.5503	7552	13602	11168	10590	13965	11961	10202	6767	12809	9615	11455	9607	13117	10244											6527	9067	10725	9003	7223	7835	8033	9991	9708	6345	10109	10712	6147	8746	4763	9371
356582	99.0506	7160	12366	9480	10986	12396	9430	10830	5725	11489	8784	11282	10716	12299	9733											6223	9425	11269	9417	7953	12801	8717	8358	11700	8274	9573	10164	5489	7831	5329	8645
358383	99.5508	7464	10978	9594	10455	12062	11957	10341	4928	10598	9641	10847	12185	12062	8632											5333	6822	6518	7987	7780	8286	9227	9168	10219	9274	9147	9155	4924	7856	5966	7907
360184	100.051	5379	10851	11235	12151	12020	9155	10835	5649	9075	8856	10569	9189	11387	8299											6046	6270	8493	7400	7480	9995	9176	8016	9274	6438	8801	7632	5548	6662	4725	9248
361985	100.551	7552	11235	9198	9295	10670	8501	9155	4978	9295	7991	9261	9619	10033	8966											4569	7071	8387	7447	6822	8160	6966	6430	9792	5641	8219	9341	7282	7982	5616	8210
363786	101.052	6544	9911	9797	9974	10868	8670	10189	4038	9670	6881	8890	7649	10556	9075											5995	6312	11037	8257	6527	9750	9451	4860	9164	8396	7911	7898	4865	7902	5358	8050
365587	101.552	7451	8345	8215	9624	11345	9683	8843	5168	8008	8738	8666	8375	12484	7561											4573	5662	8236	7552	6109	8371	8755	8050	10088	5265	7345	7105	4983	6080	4573	8345
367388	102.052	4675	8472	8231	8324	10704	7860	7999	5493	8198	5907	11598	8168	10151	6362											5143	7784	7029	7244	7143	8560	7674	8269	8885	5274	7780	7362	5025	5561	3704	7147
369189	102.552	4548	10383	9025	10641	9185	7350	9278	4894	7742	7109	9240	7725	9738	7885											5080	6940	6772	6949	6890	10122	7016	7653	10649	5556	8383	9219	4936	7404	4797	7885
370990	103.053	6902	8345	8223	8877	10991	8231	7670	4696	6860	6447	8004	8497	9822	7278											5223	6535	7649	6974	6569	7763	6687	7004	8227	6362	7729	8704	4244	7223	4658	8130
372791	103.553	6776	9278	8198	9383	9582	8826	9468	3957	7885	6750	7805	8071	10628	7561											5067	8084	9168	7426	5932	7531	7210	9518	8991	6451	6902	7552	5054	7746	5295	7404
374592	104.053	6615	9957	8109	9404	11438	7586	8105	4970	7839	5160	9695	7565	9101	7949											6548	7147	8738	6675	5329	8130	8219	7489	9396	6991	6236	7244	4818	8598	5843	8598
376392	104.553	6915	8531	8278	8164	12282	7118	9176	4405	7809	8050	9771	7080	9160	7371											5759	7122	10556	7438	6978	10172	8033	7919	9037	6067	6396	7949	4126	8219	5455	8387
378193	105.054	6966	8544	7561	7447	10906	6210	8345	4645	7565	5341	10991	8544	9759	7371											5957	6999	9729	7750	7480	7767	7164	8645	8695	5405	7991	8594	4734	8649	4894	8615
379994	105.554	7645	8759	6852	6472	10527	7548	8523	3097	7788	6687	8666	7696	10134	8341											6189	7080	7261	6502	8923	8999	7636	7894	8763	5362	8501	8058	4708	7350	4957	8451
381795	106.054	7569	7645	8936	3894	11016	7717	9231	5476	8906	6624	8037	6700	9582	7586											7708	8071	10273	8071	6016	7561	7708	8788	9484	6286	7472	8350	5126	9392	4873	8890
383596	106.554	6615	7738	8366	3772	10354	7025	8615	5046	6535	5843	8531	9033	8522	7923											6345	8387	8970	7552	4839	7978	7189	8447	9480	6784	7096	7982	5156	8480	4987	9776
385397	107.055	5907	8620	8303	4156	10894	7759	8582	5616	8556	7160	9274	6362	7539	8890											7767	7683	8122	7839	7016	8767	6687	6641	10316	7426	7679	10105	6704	8333	4894	8290
387198	107.555	7734	7396	8345	2877	8404	7974	8506	5101	5253	6430	7869	7784	6092	8966											7539	7814	11041	6860	7936	8987	7105	7687	10252	9649	8075	9733	5143	8721	5185	8662
388999	108.055	7712	9379	6405	5316	8953	6826	10219	3093	7447	4936	6932	5603	5565	7590											7767	7341	8784	9510	9506	10138	8177	7738	7704	7417	7590	9936	6147	9311	5713	8970
390800	108.556	6274	7172	4645	5945	8316	7615	9071	3202	5843	5945	10792	9881	6345	8885											8746	7253	7856	7096	6447	11459	9328	7518	8632	7991	8168	8890	7350	9978	6126	9430
392601	109.056	8480	6371	7464	6970	6320	7468	8375	2493	6442	5966	6506	8565	5278	7957											8413	7776	8067	7535	6915	9497	6818	7590	8577	7510	7966	9468	4936	9455	6565	7805
394402	109.556	9679	6168	8202	8894	6354	5278	10058	2409	4991	7683	8231	7742	9780	8455											6565	6151	7809	7649	9189	9560	9240	8236	8679	8995	8067	10219	6160	9252	6345	7485
396203	110.056	8539	7307	5493	10657	9881	9565	8961	4067	4983	6561	6506	5890	9341	8535											7400	7582	7337	6552	6729	11273	7826	7202	9687	7843	9590	8455	6206	9349	6852	9172
398004	110.557	8350	10619	9341	10649	12185	9797	10788	5270	12640	6894	8902	8012	9383	8134											8265	7303	8147	7409	6240	10041	9193	6455	10560	7987	8957	11919	5763	10050	6822	9430
399804	111.057	9117	10265	11425	8767	9358	9413	9911	6734	10358	9101	10598	11501	12396	7156											10383	5801	8400	8219	8489	9501	8717	9923	10071	8172	6679	11134	6561	9767	7573	8877
401605	111.557	8417	10016	9940	8995	9404	8130	9683	6729	9662	7717	11480	11392	12058	7797											9134	5620	6970	7320	8290	7451	8240	10029	10581	6286	8843	9590	5725	8409	7282	8468
403406	112.057	10016	12168	9434	10172	11383	8333	8282	6312	11438	8033	10565	10235	13607	8307											6603	7809	9126	8198	7805	10387	7670	8902	11404	6029	10531	10881	4751	8843	7358	8333
405207	112.558	8607	9455	10468	9455	11982	7037	8050	4708	11084	7320	10548	9328	11826	9944											7227	7624	8117	7632	7552	9894	9978	9227	9430	6143	9231	10598	5274	9598	6983	7708
407008	113.058	7767	10235	11176	9999	14003	7826	6514	4527	11695	6109	10805	8117	9721	7987											7130	9160	8598	7337	7455	10210	11522	9459	9354	7607	8826	9999	5789	11286	7046	10261
408809	113.558	7324	13763	8944	9624	11054	8046	9957	4915	10168	5295	8797	10025	8417	9274											8290	7468	9822	8645	6012	11354	8847	8075	8839	7674	9624	11712	5755	9514	6565	9101
410610	114.058	8755	11700	8282	7476	10387	6637	7860	5198	9978	6662	9565	8067	11134	8814											6240	6607	8717	7552	7556	9936	10100	5999	7177	6729	9598	10598	6189	8999	5215	9628
412411	114.559	8063	9632	8079	7501	12092	7763	8248	4582	9413	7966	8784	8548	11079	8286											5966	6750	7236	7286	6409	9754	11577	7274	9898	7468	8514	10919	6561	10666	5751	8295
414212	115.059	6172	9780	8109	9265	11463	6974	7409	5531	9126	8020	11383	8151	11750	9708											7704	7662	7383	7717	6869	10084	9362	8573	9721	7514	11012	7156	6012	9603	5696	7797
416013	115.559	6784	11341	8569	7923	10851	8400	7489	5135	9763	8025	8658	8970	10611	8303											7198	7244	9130	6653	6324	9176	7978	8236	7320	6278	6080	8392	5759	8649	6358	6455
417814	116.059	7890	9269	8371	9075	12003	8147	7763	4405	9670	7704	9130	8687	9404	9434											5291	6156	10046	6653	6818	8417	9063	7392	8885	7438	8244	7708	6008	8345	6843	6907
419615	116.56	6696	9164	8573	7940	9463	7303	8139	4405	10514	8198	9345	7253	8906	9413											5691	6949	8206	5476	5780	9776	6658	5818	8421	7004	8392	9063	5497	8105	6037	7430
421416	117.06	7936	10117	6793	8126	10548	7025	6653	3704	8691	7447	9455	8054	8679	6848											5164	5316	6464	4907	4949	11704	9695	6632	9598	5506	7050	7307	5831	8130	5632	7510
423216	117.56	7649	9075	7527	8902	10400	7590	8290	3932	9527	6544	9438	8139	12181	8248											7134	4422	7067	6628	4827	9383	6016	6772	10649	7375	8375	8873	5746	8476	5346	7316
425017	118.06	7291	8759	6447	7801	9657	7282	9122	4042	7995	5046	8708	7447	10459	6983											6189	4223	5388	5751	5843	7734	5392	6911	8653	6337	8539	9134	5008	7615	6434	7641
426818	118.561	8590	9446	7080	6970	11396	7632	8480	3506	7198	7227	9160	7772	10636	8594											6810	6455	6451	6400	8341	7417	7594	6860	6848	6603	7653	9873	4557	7552	7666	7987
428619	119.061	7118	8632	8396	9615	10172	7126	7725	3274	9244	7864	8181	7177	9181	7961											7012	5502	7995	6915	7063	7552	6704	8177	7366	5637	7987	9666	4312	7421	6409	7902
430420	119.561	5076	8185	8324	6337	9780	6729	7215	4713	8590	5708	7236	6717	10885	9328											5126	5198	6780	6278	5907	7122	6244	6518	9847	6210	6898	10349	4869	7075	5261	6548
432221	120.061	6151	8020	7134	7501	9582	8839	8531	4527	8434	6126	9442	6316	8109	7759											4793	5177	7717	5324	6725	7620	4945	6413	7493	5645	6502	8084	5151	6156	5253	6291

## Sheet: Ave 3
0-72 hours: 12-12 Light-Dark (LD)
72-120 hours: Constant Darkness (DD)
Period analysis: DD, 72-120 hours.
Time (hrs)	TD2/+; ptimTIMLUC/+	PsiRNAiKK/+; ptimTIMLUC/+	TD2/PsiRNAiKK; ptimTIMLUC/+
0	9837.75	11606.3	17368
0.5	19274.9	19337.9	22082.6
1.00028	22196.5	21113.9	23835.1
1.50056	23053.4	21577.9	23736
2.00083	22424	22284.8	25160.4
2.50111	23732.7	24283	27955.7
3.00139	24345.2	26535.7	29572.2
3.50167	26638.2	28141.8	31967.1
4.00167	28167.8	29312.8	33741.1
4.50194	29066.8	32931.4	34987
5.00222	30274.9	33724.3	36287.9
5.5025	30675.4	35540.2	37914.5
6.00278	30996.5	38892.1	38029.3
6.50306	33130.5	40220.2	40032
7.00333	34822.9	41180.6	41141.8
7.50361	36039.2	44013.4	42538.5
8.00389	35738.6	46178.3	42814
8.50417	35490.7	46732.5	43015.8
9.00444	37379.8	48853.5	45931.7
9.50472	37607.2	49122.8	44877.6
10.0047	37489.5	53851.8	45432
10.505	38162.2	54076.7	46082.2
11.0053	38535.5	54921.2	47353.1
11.5056	40300.4	54752.3	47502.8
12.0058	39095.2	58268.1	48674.9
12.5061	42592.2	60642.9	51132.4
13.0064	46639.8	63608.2	54764.8
13.5067	49647	67744.7	58319.5
14.0069	54441	74846.8	61004.8
14.5072	54592.9	72523.8	60833.8
15.0075	57468	75514.9	60460.9
15.5078	55182.1	71922.5	59408.5
16.0081	56510.9	75239.8	61155
16.5081	56753.3	75196.2	58767.8
17.0083	55838.2	70787	58151.7
17.5086	56718.3	73298.6	58625.2
18.0089	56823.3	74187.8	57953.5
18.5092	53927.5	72943	54866.8
19.0094	56305.7	71381.2	53953.7
19.5097	52215.4	66865.1	52220.5
20.01	50423.8	63002.9	48581
20.5103	48065.3	61471.5	49235.6
21.0106	47384.6	53944.1	46059.4
21.5108	44218.4	45208.7	41233
22.0108	41463.2	37779.3	38534.5
22.5111	41595.9	33019.2	35959
23.0114	38451.4	34401.3	32786.2
23.5117	34597.2	34324.5	32367.1
24.0119	33193.8	32148.2	25973.7
24.5122	25769.4	25962.8	21193.8
25.0125	21947.6	23077.4	19206.8
25.5128	18177.2	19281.6	16510.3
26.0131	16860.3	17122	14359.5
26.5133	14332.1	14798.4	12551.5
27.0136	13643.1	12751.5	11146.8
27.5136	12285.8	11533.4	10618.5
28.0139	11708.7	10275.5	10055.9
28.5142	10651	10083.6	9811.17
29.0144	11060.8	9586.08	9348.83
29.5147	10613.9	9083.58	9601.12
30.015	10681.7	9024.58	9664
30.5153	10618.3	8738.75	9869.83
31.0156	11076.8	9047.25	10615.4
31.5158	11223	9269.67	11135.1
32.0161	12641.2	10030.6	12742.2
32.5164	13225.2	11036.4	13677.7
33.0164	14987.2	11506.2	15712.4
33.5167	15843.5	13359.6	16318
34.0169	16588.7	14412.8	16621.6
34.5172	16251.9	15496	16891.6
35.0175	15979.8	15352.2	16149.9
35.5178	16227.9	15567.8	18749.2
36.0181	16902.3	16579.9	23672.5
36.5183	21827.6	21235.2	30896.9
37.0186	31118.4	27473.2	37845.2
37.5189	36860.8	30134.9	42007.9
38.0192	42877.8	36691.3	49505.4
38.5192	44249.2	38094.1	51021.6
39.0194	48248	43090.5	52636.3
39.5197	51200	44578.2	53250.3
40.02	54628.7	47615.5	55644
40.5203	53586.8	47965.5	57532.4
41.0206	55741.2	52148	57335
41.5208	54534	52150	58672.7
42.0211	55909.5	53873.3	58382.5
42.5214	54729.2	54344.7	57172.5
43.0217	53217.7	52486.8	56505.1
43.5219	52636	52758	55769.4
44.0219	50933.8	49462.8	53886.8
44.5222	48228.2	49456	53213.9
45.0225	45441.6	47893.6	48604.6
45.5228	45577.2	45210.6	48937.5
46.0231	41423.1	37668.2	42868.2
46.5233	36655.7	30088.2	35699.6
47.0236	33042.4	24524.7	30733.3
47.5239	26464.4	20642.7	26988.2
48.0242	26235.3	16293.2	20658.8
48.5244	18201.3	14714.7	18736.7
49.0247	15081.7	14510.7	15342
49.5247	11914.3	13070.2	12796.7
50.025	10945.1	11349	11168.4
50.5253	9494.58	9512.75	9399.21
51.0256	8860.5	8134.33	8281.46
51.5258	8013.83	7078.5	7122.33
52.0261	7460.67	6485	6502.92
52.5264	7112.92	5436.92	5991
53.0267	6658.92	5019.33	5670.88
53.5269	6554.17	4848.25	5671.21
54.0272	6445.25	4761.17	5474.58
54.5275	6746.58	4630.42	5550.12
55.0278	6666	4614.25	6044.75
55.5281	6951.58	4513.42	6190.92
56.0281	7359.08	4594.75	6909.46
56.5283	8012.25	5038.75	7786.75
57.0286	8625.58	5546.17	8855.75
57.5289	9513.83	6279.25	9923.38
58.0292	11019.2	7558.75	11598.7
58.5294	12462.6	9120.67	12109.2
59.0297	12472.7	9664.25	12847.6
59.53	12821.5	10648.6	13674.6
60.0303	12888.6	11852	17784.2
60.5306	16318.7	14254.2	23408.1
61.0308	19551.3	16433.5	25541
61.5311	26688.8	19795.4	29695
62.0314	31757.8	21387.8	32587.5
62.5317	32981.8	22818.1	33722.4
63.0319	35709.8	26939.6	36531.8
63.5322	35649.8	27374.4	36429.2
64.0325	37401.7	29040.4	37036.5
64.5328	39831.4	31943.2	38416.9
65.0331	37543.3	30374.4	40066.2
65.5331	39140.4	33121.4	40857
66.0333	39040.8	33737.7	38838.9
66.5336	37792.9	32854.8	38893.6
67.0339	38898.7	34524.4	40194.9
67.5342	38460.8	34465.4	38884.9
68.0344	35735.2	33162.9	39278.7
68.5347	37018.2	34195.8	38658.7
69.035	33067.2	33175.6	35353.2
69.5353	32144.3	31065	32660.9
70.0356	30703.9	26545.6	32159.7
70.5358	28836.8	23406.8	27180.8
71.0361	25159.7	19975	24169
71.5364	25281.3	16783	23990.1
72.0367	23506.3	16800.8	23862.8
72.5369	21216.2	17664.6	23112.5
73.0372	18469	16874.2	20305
73.5375	17603.4	16227.7	18674
74.0378	16697.2	14567.5	16430.9
74.5381	15607.2	13601.4	15554.6
75.0383	14635.4	12568	13336.6
75.5386	14016.8	11743.5	12631.8
76.0389	13530	10183.4	11670.9
76.5392	12843.7	9305.33	11086.5
77.0394	11929.4	8823.75	10210.5
77.5397	11732.6	7485.92	9831.92
78.04	10971.1	7202	9263.79
78.5403	11346.2	6537	9092.83
79.0403	10789.3	6262.25	8985.46
79.5406	9965.42	5902.83	8670.17
80.0408	10751.3	6015.08	8813.46
80.5411	10784.7	5806.83	9147.08
81.0414	10696.7	5908.33	9384.83
81.5417	11038.2	6202.58	9792.62
82.0419	11209.1	6380.08	10253.4
82.5422	11734.1	7300.75	11046.4
83.0425	12039.2	7778.25	11401
83.5428	11780.4	8255	11941.8
84.0431	12023.1	7972.92	12624.8
84.5433	11287.8	8873.75	13954.1
85.0436	10235.9	9265.75	14409.3
85.5439	11957.4	10516.8	15591.6
86.0442	15046.9	10746.1	16564.5
86.5444	17013	11464	17016.6
87.0447	18611.1	12056.4	16621.3
87.545	19825.3	12416.4	17484.6
88.0453	19448.2	13467.8	17993
88.5456	19478.8	14153	18203.7
89.0458	19592.8	14722.6	18323.3
89.5461	19470.8	15192.4	18168.6
90.0461	19321.7	16058.8	18985.8
90.5464	18503.3	15278.6	18705.6
91.0467	18364.3	15740.5	18712
91.5469	18519.4	16141.3	18538.2
92.0472	18334	16472.2	19247.8
92.5475	17149.8	15766.8	18671.7
93.0478	18124.1	16241.2	19100.5
93.5481	16542.8	16671.5	18003.9
94.0483	17255.5	16184.6	17046
94.5486	16587.2	15513.8	15739.3
95.0489	16614.3	14613.2	15532.3
95.5492	16621.2	13590.1	14694
96.0494	16248.8	13079.7	14770.2
96.5497	15096.3	13251.1	15047.7
97.05	14748	12378.2	13727.9
97.5503	14349.9	12384.7	13162
98.0506	13270.8	11539.8	12606.2
98.5508	13589.8	10917.8	11861.8
99.0511	12578.5	10311.2	11092.9
99.5514	12186.2	9498.5	10966.1
100.052	11619.4	9177.67	10484.5
100.552	11108.5	8587.25	9896.54
101.052	11403.2	8164.92	10063.4
101.552	10503.4	8741.58	9723.83
102.052	10606.1	7828.83	10094.2
102.553	10541.3	8083	10090
103.053	10600.8	7263.17	9850.75
103.553	10614.8	7524.67	10295
104.054	10339.8	7357.42	10194.5
104.554	10489.7	7637.92	10526.5
105.054	11171	7996.92	10943.4
105.554	10623.3	8514.42	11699.6
106.055	11597.7	8627.58	11597
106.555	11481.7	8269.08	11580.3
107.055	11734.7	8882.25	11751.7
107.556	11485.3	8124.58	12189.5
108.056	12009	7926.33	12106.5
108.556	11183.4	8097.08	12365.3
109.056	11101.1	8221.42	12026.9
109.557	10625	8677.5	11733.2
110.057	11386.5	8790	12145.5
110.557	13289.9	8969.25	12018.4
111.057	13500	9298.5	12069.5
111.557	13109	9207.17	11798.9
112.058	13858.1	9818.92	11776.9
112.558	12722.1	10096.7	12114.8
113.058	12948.7	10292.4	12567.3
113.559	12301.2	9733.42	12428.8
114.059	11898.2	10056.9	12003.7
114.559	12087.7	9944.67	11788
115.059	11258.9	9770.33	11250.8
115.56	11019.9	9509.42	11003.9
116.06	11142.2	9946.5	10711.3
116.56	10614.9	10710.5	10957
117.061	10162.8	10432.1	11247.4
117.561	10177.4	10095.9	10209.9
118.061	10176.8	9338.25	10035
118.561	9605.5	8598.42	9565.21
119.062	9868.42	8771.83	9813.25
119.562	9817.08	8336	9613.88
120.062	9351.83	9017.83	9911.54

## Sheet: Wells 3
		TD2/+; ptimTIMLUC/+ Wells												PsiRNAiKK/+; ptimTIMLUC/+ Wells												TD2/PsiRNAiKK; ptimTIMLUC/+ Wells
Time (hr:min:sec - from reader)	Time (hrs)	A01	A02	A03	A04	A05	A06	A07	A08	A09	A10	A11	A12	C01	C02	C03	C04	C05	C06	C07	C08	C09	C10	C11	C12	G01	G02	G03	G04	G05	G06	G07	G08	G09	G10	G11	G12	H01	H02	H03	H04	H05	H06	H07	H08	H09	H10	H11	H12
00:00:00	0	11527	7210	7489	13345	8261	7649	9320	9759	12526	8961	9885	12121	10290	14628	14299	8560	9944	9400	10982	10902	11413	16990	11611	10257	28775	17450	20214	16889	15029	17644	14758	12851	29645	18336	14189	18147	13590	15872	14455	15446	15860	23923	18362	19594	19628	14050	12307	9818
00:30:00	0.5	18362	14408	15712	22404	18948	18632	18463	19210	24016	20940	17931	22273	17653	19644	22666	18463	14885	16526	18923	18746	22649	25514	20982	15404	35185	20391	24792	19855	18868	21282	19370	17978	36620	20649	20450	21653	16109	21096	16412	20429	19750	28784	20590	24817	27400	17421	20796	19286
01:00:01	1.00028	19408	16910	19560	21695	29362	20948	22822	21265	26843	20763	20526	26256	20712	24969	25704	20294	18050	18657	19965	22843	20113	26518	18944	16598	36147	21286	30320	19678	22758	23282	20598	19505	43460	20159	20796	23315	15801	22054	17623	25315	23851	30480	22045	29497	28248	16556	20615	18653
01:30:02	1.50056	18969	14269	19505	26805	31054	27088	22425	21801	29311	20315	19433	25666	20231	25062	26826	21024	15341	16674	19796	28328	20990	28645	17104	18914	35510	21218	24931	21235	29269	20383	20066	19408	36084	22450	20649	24919	16256	19666	19628	22839	22653	33611	22223	25505	30484	18438	21062	21176
02:00:03	2.00083	18450	13809	18379	24463	35282	24320	21792	18830	30256	18433	21147	23927	20733	23560	27341	22168	16628	18868	18543	24535	20699	31404	22585	20353	34417	21560	29375	21763	26286	27754	20784	20446	33341	22121	22872	25033	18881	22598	24653	23822	23737	33793	24028	29522	36029	19387	20830	20817
02:30:04	2.50111	19480	18543	20235	25931	33497	26725	23016	17691	31286	20336	23294	24758	21670	26189	31902	22476	19615	19218	21125	29982	25130	31501	20813	21775	39190	24050	34054	24168	26674	27067	23611	22640	39667	23952	24805	26927	20602	25231	23526	32054	25408	38118	27763	29590	39012	22640	23763	26425
03:00:05	3.00139	21007	19349	20678	28645	35974	26590	25851	19830	24096	21408	22197	26518	23843	26860	32240	24033	22834	20704	23066	31041	25881	33649	31721	22556	41603	25434	34080	27050	27151	28826	23556	25699	41460	27210	28784	27370	21096	25910	25362	28936	25467	40987	27902	36531	42878	23737	26261	26442
03:30:06	3.50167	23577	27480	22429	26969	34780	25412	28214	20058	30531	22303	23864	34042	25421	27961	29970	27100	24471	24948	27936	31615	29923	35565	25328	27463	43165	26218	38236	30214	29957	31729	24910	27788	45081	25058	29818	29016	23893	28223	26459	39742	27982	43713	30759	37578	43675	25467	29391	29138
04:00:06	4.00167	26345	28775	23024	27581	34316	28594	27670	21083	33658	25336	24623	37008	29252	32020	30864	28413	23919	21294	27581	34586	28307	36983	31122	27412	44249	29649	37734	29176	34265	30320	30687	28590	44169	26704	29248	31666	23636	31333	27923	38607	32185	46752	33434	36810	56298	29906	28408	28037
04:30:07	4.50194	26239	29375	25037	31890	40895	33928	30088	21746	27535	24881	25438	31750	29307	37257	35206	32383	27210	25843	30543	34130	30666	40215	36067	36350	45047	28910	45123	30539	31953	35134	29451	30514	46520	31134	34329	33852	26201	33911	29227	34649	32847	47473	33577	36995	49824	29358	32805	30316
05:00:08	5.00222	27872	32244	27341	30227	42338	29058	29932	24125	32164	25501	28510	33987	32750	41945	35738	31337	29438	31012	32067	36607	33290	37472	33223	29813	48786	32219	41063	31632	33451	42469	31683	30358	47389	28999	33067	33189	25282	34227	32067	34983	34328	50512	35092	38996	51854	33096	33333	32835
05:30:09	5.5025	30100	32172	28261	32991	38177	28615	31586	24615	29792	24480	30299	37017	33544	36666	40118	33649	29501	28986	31164	38493	35940	42308	41734	34379	53162	32628	43785	34101	37303	41135	34683	32645	47988	36046	33590	35666	27210	33413	32105	34683	37105	49773	35118	44034	51993	33721	33966	34096
06:00:10	6.00278	33274	32607	27413	34122	37772	25948	30987	25121	33046	26239	29712	35717	32742	46887	43735	35198	32607	29016	37920	40696	32489	45663	45030	44722	50381	33409	44165	34518	32227	38515	32041	33269	49630	35995	35831	41232	29100	33320	32130	36451	36776	53863	38071	40447	53947	34058	32877	30451
06:30:11	6.50306	32527	37021	29438	35054	41928	33535	31143	27155	30999	30624	30442	37700	37206	44638	41836	38122	33447	33088	39738	43486	37565	48921	41241	43355	54348	34518	48967	37544	39266	38920	36746	30986	44692	38565	37156	42190	29670	39342	32556	36421	40700	55804	37109	42359	54217	37114	37303	34274
07:00:12	7.00333	35915	39232	28729	34603	41709	32392	35054	29953	32919	32345	34746	40278	40857	48301	42249	38122	35147	36949	39510	44503	39249	45832	43549	39899	54639	37388	44646	36088	39641	41654	40464	31396	47895	37915	38873	40088	31219	39721	35679	41291	39979	55188	43177	39434	57809	36476	39806	36936
07:30:13	7.50361	38080	37582	28577	39979	41384	33624	36101	31581	34231	32573	37181	41578	42443	46174	47528	40164	34514	40101	39886	50246	39591	51883	49402	46229	53939	35561	54040	43916	39008	43397	41798	33493	51027	35468	37232	45726	32003	40430	36227	39342	44093	60813	41806	41561	57758	41831	37168	33286
08:00:14	8.00389	36569	41519	29290	37400	42068	35637	36147	29750	34750	30126	34134	41473	45591	47326	53664	46254	37168	39932	40127	48478	40717	57969	46537	50377	55217	38599	48967	40350	40557	42502	37464	34902	55352	41194	37839	42173	32860	38958	38949	41646	44600	58956	42971	43114	58104	36941	39434	35886
08:30:15	8.50417	37476	35953	28716	45397	40489	34037	35109	27898	36599	29915	32801	41498	46258	51284	56606	46836	38839	37814	47254	46039	41325	56846	43747	47942	54010	37059	49166	36945	41561	43848	39202	37671	50596	38725	39633	40468	31771	41430	36890	41523	45701	58564	42338	43431	57264	37354	45043	42186
09:00:16	9.00444	35793	37384	30100	43279	45178	36734	40148	30674	36371	32438	38168	42291	47992	48436	51309	50710	37190	42502	46731	48782	45317	59100	54036	54137	57205	40468	51491	43591	43148	44815	40633	34995	53584	45047	44334	46794	34902	40481	42013	55352	48811	63337	45292	41063	62101	37751	45866	39287
09:30:17	9.50472	40089	41203	31636	43448	44735	41059	38688	28417	31915	28944	37147	44005	47959	51609	49119	53508	42574	45486	45477	44633	44743	64270	47524	52571	52875	42882	53711	43692	44313	43266	41270	37460	48528	38042	40363	41089	34577	45992	44460	45891	45460	60425	44958	44477	62691	39181	42013	39447
10:00:17	10.0047	40865	40966	29826	43249	45536	40878	37882	28944	32556	29383	34480	45309	53896	58471	57564	52208	41219	45186	46942	49558	48997	69537	62392	60252	55087	42498	47030	45701	42507	44338	38164	33611	53871	46026	43946	42933	35291	50588	44460	43933	47461	62949	48174	43735	57804	39527	41295	39439
10:30:18	10.505	38498	38228	28767	41312	45199	41675	39793	32928	37164	32607	39004	42772	50883	61054	59974	49216	41950	49039	51348	49900	44633	68406	63759	58758	53888	44443	53289	41544	47001	50132	40612	37620	54259	49862	48098	41836	38443	41350	40700	47503	47073	64219	44465	36519	59433	40903	43435	39346
11:00:19	11.0053	40793	41203	30231	44811	43718	44195	35835	31708	36308	32248	40384	40992	54099	61978	53601	47212	37637	52601	54264	48376	51795	82710	58691	56091	55078	46136	47997	45368	46418	50314	40949	43097	55960	50896	47068	43798	37949	46587	43950	46456	46562	64202	49794	40848	62388	40329	46250	38080
11:30:20	11.5056	40004	38561	33236	48782	54956	37194	41279	29678	40118	31598	38029	50170	55661	55504	59159	53728	41080	50917	53234	51023	51989	73758	52694	58281	55382	44469	55884	45418	45832	53196	43988	41760	55627	45781	46321	44169	36730	46034	46212	47857	51706	53580	49723	40802	62485	42059	45967	39084
12:00:21	12.0058	40823	35514	30480	40979	52394	40835	39878	31666	40578	30029	38810	47157	54226	62941	62345	61079	40515	62012	49178	50989	56500	77130	65236	57066	56319	47794	53445	46845	48976	48322	46077	37181	56884	51407	43540	43300	38346	48085	45697	57948	53031	57796	49672	42034	62033	42173	50508	40785
12:30:22	12.5061	44967	37835	32463	50288	52888	46296	37882	32839	43832	35924	44730	51162	60197	69499	69900	57809	42684	55336	47246	53504	58357	77894	74606	60683	56188	48735	59176	48625	49309	54310	47507	44933	58079	50845	47220	48807	43021	50330	47887	52542	54753	61396	49562	42253	71930	45093	50322	44355
13:00:23	13.0064	49740	47431	38033	53681	60413	47596	40734	36544	45482	43794	44102	52128	64772	71183	75218	55200	44427	66013	58876	63768	61379	74150	64371	63941	64126	54416	57771	52474	55196	58146	53744	54538	71158	54698	47790	52795	43659	50541	52938	51744	58745	67355	50415	36865	73044	52360	56395	43443
13:30:24	13.5067	55639	41612	42912	58252	59054	49199	49444	34603	57201	43697	48292	55859	69461	74496	79532	64599	49900	58906	63392	59577	66296	83377	75927	67473	66992	63320	56855	50571	58467	67355	58872	50056	78173	56770	49495	57112	44823	62860	57948	53479	60868	65865	55686	45963	79755	55504	56175	46705
14:00:25	14.0069	55589	48988	50516	62367	65798	57180	53128	42536	51740	51179	54150	60121	75054	83411	88514	61176	57961	65481	71736	58737	74792	96403	92131	72766	72107	67081	67824	67490	59492	65566	55639	57728	67537	57045	54816	61117	47562	53753	54167	67997	63350	68001	55289	50655	83461	55074	62012	49351
14:30:26	14.5072	58488	52267	49668	60514	63595	53787	47554	40620	57079	53871	56424	61248	76615	80004	76619	67022	48993	66557	65380	65924	80482	89286	74108	79295	66811	58087	62907	62164	54137	59805	61594	61544	77476	58602	54791	61822	48786	53133	57720	69871	60223	69651	60991	53432	86859	53061	56867	49676
15:00:27	15.0075	64565	56572	47503	65211	76999	54863	49575	39890	55770	55112	56741	66815	76885	84622	75543	77806	51035	68655	58822	66874	67191	109042	93199	76505	71715	68541	68761	58319	60535	62797	57737	56479	80671	56336	50959	63312	46937	50516	53154	53905	58024	73386	59585	53322	80443	48617	57897	59113
15:30:28	15.5078	62443	51052	47161	61565	63249	50406	54006	38371	54019	53310	59784	66819	80026	70626	79861	63869	54226	70533	65975	58340	70900	94335	80005	74374	73437	59189	68587	58446	68014	62962	57648	56855	74728	57564	53352	59130	45591	52618	52348	56281	53533	71479	55327	46857	84888	51457	57876	47638
16:00:29	16.0081	63607	60961	51588	67912	64278	51588	46406	44975	57935	54888	51259	62734	79088	81300	78590	62814	55998	75303	79021	70010	76995	93549	71711	78498	72863	65827	76607	58269	58568	63164	50533	55382	77388	51774	54989	65726	45199	56648	60375	55568	58931	66363	60801	51423	87775	58678	66650	48220
16:30:29	16.5081	58387	54985	47119	63029	67245	53930	55859	41785	56589	55597	54019	72496	73293	78316	78945	59214	53609	73804	74530	69984	80237	94774	89514	76134	67448	55015	62793	55922	61033	57986	48499	58361	79603	57872	51791	58661	45009	50377	54635	70120	61451	68187	55146	55964	75661	52483	59092	47317
17:00:30	17.0083	63856	53934	49596	63962	63920	49748	54479	42097	60624	52419	52394	63029	72943	68018	75387	62320	60231	74636	72479	63198	71445	83394	76071	69322	70204	61197	68634	51153	61995	64574	56800	59408	72255	58653	53985	62620	48452	52242	58353	45794	59062	63438	52913	39785	81102	48934	57758	46330
17:30:31	17.5086	62375	56597	52740	64464	60197	57454	54141	47237	53027	56606	50520	65262	70466	71479	72876	64582	67191	85027	77898	67891	75091	85732	70310	71040	72681	56720	60653	56542	58475	69453	55471	55622	74648	54340	51748	55711	42806	52141	53268	55200	59505	68566	52390	50904	83111	57332	61455	48263
18:00:32	18.0089	58999	56754	50845	59902	68174	51394	53415	43908	59028	56420	57446	65595	76830	77670	73602	62911	62303	67997	72576	63050	73842	90751	85842	82879	65422	51428	56087	53141	59750	58859	49735	53770	82140	57775	49621	63742	45899	55217	52141	66431	57838	68490	54082	49056	78295	58859	60898	42207
18:30:33	18.5092	58155	53635	51622	59560	58129	51267	50849	43380	56526	53901	48955	61151	75189	65701	76670	61860	62881	77295	65490	67241	79046	80882	88463	74598	73125	52263	55044	52787	53179	57040	50398	48980	65819	53905	49512	50373	40797	53474	51972	63717	60666	61864	45963	45009	88341	50022	51596	40958
19:00:34	19.0094	65768	53601	51297	65832	70635	53550	56783	38523	55926	57741	48419	57593	76062	81490	73927	64709	61544	67857	61869	61810	67621	84500	69339	85846	71213	55293	59547	54483	56002	64224	46524	47672	64481	55513	47575	54783	42190	56260	46275	50014	61341	63823	51149	44418	70039	45380	46904	39785
19:30:35	19.5097	57433	47334	44431	58370	60117	54407	46224	37877	54023	58450	47186	60733	75476	77873	69237	52879	61649	61041	63591	68191	60548	80773	69871	61252	66629	56475	56171	57163	49499	62873	48022	54989	61632	46288	46651	48474	37257	51761	47170	53559	55829	59201	54416	41971	70698	44275	47246	35042
20:00:36	20.01	57859	47655	42827	59218	57674	52976	46900	35480	50567	51833	51850	50246	67558	71474	67904	57669	62295	53812	46469	62054	62189	62696	76535	65380	59341	50162	52048	47583	48001	57408	42127	44005	57543	51926	46604	48444	35864	47706	45136	47284	51550	50736	42688	42477	71483	42975	50267	32586
20:30:37	20.5103	46423	43688	42578	54150	54200	49824	50503	35873	51913	53386	41232	53014	71875	66220	68638	57572	56787	57239	57568	61096	57074	71107	59936	52546	60227	48267	54517	60691	51850	60645	46397	50318	56745	46908	48541	44958	37772	49204	52900	47381	47461	50980	42684	43097	61248	42063	45338	31463
21:00:38	21.0106	51588	52702	39738	47516	58074	44258	48014	33172	49740	50280	45254	48279	67714	65426	65519	40523	49541	50904	44950	55433	44275	57315	51482	54247	52993	43536	47195	48486	46642	55454	50246	49617	54905	43452	39363	47035	35109	40460	41270	53154	41582	51959	46372	42604	67051	34734	42869	29337
21:30:39	21.5108	43629	44081	42443	50879	50503	40848	49373	31830	43578	42954	43042	47461	52787	55838	59780	37012	45794	40397	29185	43958	43152	46153	42186	46262	52673	38401	36472	39468	44735	57327	40325	33658	52685	42950	34535	41110	35708	41553	37848	44887	39055	45946	37607	40624	54846	35232	39574	22374
22:00:39	22.0108	41034	35215	39772	43920	48225	38430	36932	30830	47182	45541	42718	47760	49048	47596	42768	25805	39865	33767	35341	40861	34535	35075	33666	35025	49187	36654	40932	25366	38772	51499	34750	42068	49934	39067	38405	41511	33755	33404	35071	33345	40473	39814	37557	44975	52069	28944	31953	25324
22:30:40	22.5111	48672	46954	35582	45461	47161	33987	42009	28843	45646	40616	42106	42114	42705	30505	47174	27666	34198	29548	22969	34198	39451	32362	31236	24218	45030	36569	39236	35320	38337	44633	37801	31949	50816	35738	40481	34451	25197	33231	24206	27155	36308	39544	34337	33223	51955	23767	40717	23016
23:00:41	23.0114	45414	39021	34291	40802	44650	30248	36991	26771	43313	35181	42992	41743	36160	33801	37071	28273	36586	45933	24547	34776	36088	26763	41300	31518	43570	29117	30818	31105	35405	39877	29725	28353	43958	33392	41511	33881	24201	30514	25442	20564	32362	40831	35109	30455	50449	24906	32003	19320
23:30:42	23.5117	36080	33084	31712	40131	36919	29948	39190	24522	32974	34911	35911	39785	38742	20560	39396	31442	35468	33147	34303	32978	35050	38974	39147	32687	42169	28657	32999	35548	33953	39135	30868	25590	36101	36708	39569	31750	25986	30062	29240	32257	34552	35084	29835	29349	43152	28269	26130	19847
24:00:43	24.0119	34421	33219	27189	39160	38274	27560	36109	23303	34936	35518	29894	38742	30729	37839	28974	28370	29273	33847	30062	26834	32662	38447	40359	28383	32050	25353	27248	28193	25704	29737	24822	21699	31219	25088	26750	26062	21180	22910	21767	29429	29611	32176	23147	22012	34265	20902	23387	18657
24:30:44	24.5122	25531	26438	24590	28117	29683	21362	28514	20180	27134	24927	22914	29843	30316	32666	23358	22332	23218	24147	21231	23488	22725	32978	30235	24860	26826	20704	20577	20003	23125	22716	20484	19771	27514	19577	22252	19598	15742	21767	21725	16775	23712	29172	19792	16252	27725	18341	20750	13750
25:00:45	25.0125	19471	22855	22193	20826	26261	18822	23476	14864	24315	23020	21505	25763	22147	23256	21974	21851	26239	24910	22560	19185	20995	27746	25957	20109	25708	18391	18940	20197	20058	25640	16678	15716	21687	20201	20640	20944	12341	17712	18729	21239	24180	19345	17121	12940	27699	13910	18590	12358
25:30:46	25.5128	18640	19197	18239	17872	19058	13349	21244	12172	20801	18349	16788	22417	18708	19104	19193	16990	19121	18704	18041	15877	19142	22016	24725	19758	22484	18990	14054	18767	16923	20012	14674	13252	21096	15210	16775	15940	12303	14720	13244	18914	19531	21661	16383	10982	23623	11953	14640	10117
26:00:47	26.0131	18016	17716	17028	16767	18223	12214	20830	11657	17611	16699	15843	19720	18649	19358	19142	15560	16712	18193	15864	13830	13602	20847	18569	15138	20754	13894	13176	16877	16514	16746	14417	11240	17214	12847	14446	13391	10851	11868	12636	14202	16526	16788	15193	10455	20606	12240	12240	9506
26:30:48	26.5133	12387	17168	13737	15092	16598	9759	16788	9759	14341	15653	13434	17269	13349	14235	18303	11982	14657	15113	14210	10501	11155	19083	19568	15425	16733	12834	11999	14446	12050	15999	11514	10109	15328	10784	12725	13020	9409	10851	10370	10320	12974	15999	13822	11219	19311	10425	11197	7797
27:00:49	27.0136	11518	14910	14016	15619	16569	9016	15746	8037	14488	15450	12649	15699	12067	11429	16746	10906	12489	13037	13805	9531	11560	14404	14889	12155	14636	12455	10830	12885	13277	13294	10539	9518	14704	10046	10345	10016	8130	10712	8328	9615	11569	13636	11518	8126	15898	9231	11324	6890
27:30:49	27.5136	11548	13463	12105	11784	13645	9619	13940	7489	13134	14573	11362	14767	11565	10476	12839	10742	11257	10417	11303	10181	8658	17332	12349	11282	13387	12020	9695	12223	11396	11210	10712	9126	13383	9316	9425	9050	8008	10117	9767	10733	10953	12712	10666	8075	17619	8025	10712	6514
28:00:50	28.0139	10269	10974	11889	11813	13991	8738	14041	8320	13586	13615	10311	12957	11358	10493	11299	8936	9889	10695	8240	8742	8058	14868	11311	9417	14324	11248	9290	10670	10590	11147	9421	7641	12383	10316	10122	9708	6991	11590	7489	9392	10919	12155	10354	7434	12307	7911	10940	6999
28:30:51	28.5142	10906	10117	10535	9991	11041	8383	12915	7826	10666	11986	10624	12822	10219	8151	11029	8936	9282	9902	9636	9746	8033	14438	10480	11151	13168	12590	9333	11645	10716	9873	9577	7873	11894	10518	9539	8244	7185	10678	7177	10126	10206	11902	9282	6966	12543	8004	10037	6392
29:00:52	29.0144	10375	11543	10991	10358	11501	8067	12742	8658	12273	12948	10375	12898	8793	8303	10438	8662	8480	10649	9126	9814	8839	12927	9826	9176	12463	11383	8898	11451	10130	8628	9438	7198	11527	8717	10400	8687	7189	9008	7257	9088	9531	12008	8923	7987	11079	8244	8852	6286
29:30:53	29.5147	10295	10231	10257	10265	11168	8016	12860	8168	12438	10953	10278	12438	8759	7759	9987	8117	8674	9522	7417	8379	8999	11708	9577	10105	11763	11940	9358	10425	10223	9982	9915	9016	11522	10181	9210	8695	7320	10505	6113	10029	8729	11982	8949	8050	12535	9244	8919	5822
30:00:54	30.015	9522	10003	11687	9949	12678	8565	11932	8425	12299	10999	9430	12691	7662	8556	9489	7514	7877	7864	9932	7712	7620	13054	12176	8839	11324	11425	9586	10641	9856	9721	10079	8472	11269	9181	10054	8881	7307	10295	7143	10181	10417	12214	9383	7725	12337	9248	8687	6510
30:30:55	30.5153	9636	10337	10324	9324	10248	9299	12809	7839	10885	11607	11868	13244	8704	8303	9396	8759	8333	8455	7729	8506	6691	11965	9160	8864	11071	11851	9632	11721	10413	10683	10075	8299	12096	10826	10147	9771	6729	9105	7932	9729	9927	12278	9337	8430	13556	8944	7375	6949
31:00:56	31.0156	10020	10362	11750	11143	10451	9539	11906	9210	12598	11261	10539	14142	8143	8582	9759	8130	7679	9788	7599	9101	7248	13472	9615	9451	10598	12746	10754	12995	11813	10096	10210	9569	13615	9670	10210	9556	8957	10320	7573	10759	10396	14450	10451	8320	14628	9455	10295	7333
31:30:57	31.5158	11640	11370	11573	9695	12341	8898	12151	8476	12210	12438	9552	14332	9189	9003	10438	7506	8012	7805	9088	8645	7590	14455	10700	8805	11328	12328	11898	12894	12801	10700	10522	10155	10894	11923	9746	11611	7978	10733	8868	12434	12548	14704	10333	9877	13784	9632	11143	8409
32:00:58	32.0161	11809	12788	13067	10915	14223	9586	14370	9202	14277	13742	11438	16277	9290	7776	11358	7991	8189	9911	9472	9328	9261	16877	11539	9375	12480	15003	13763	15657	14370	12265	10691	11282	13421	15016	13071	12683	7501	11712	10451	14256	14628	17277	11746	11299	15501	9691	12797	9252
32:30:59	32.5164	13493	13105	14117	10328	13695	10316	14463	10742	16176	14548	12176	15543	10881	10248	11451	10657	9227	10476	9147	11657	9383	17581	13299	8430	14699	16505	13834	15256	13256	15007	13138	12062	14611	16041	13269	12978	11126	14446	10898	11653	17387	17349	12645	13712	14957	11539	12320	9577
33:00:59	33.0164	14400	15223	15569	14029	16412	10151	16438	12278	19096	14223	13007	19020	10906	8455	11168	10387	9286	12079	10235	13193	11463	18374	11294	11235	19455	17244	15526	18083	16446	15704	13337	14594	14619	17708	14754	17547	12746	13750	12636	19248	14573	20505	14353	13923	20822	13185	13953	12387
33:31:00	33.5167	14121	18260	16429	14531	16691	11497	17877	12986	18024	16189	15265	18252	13142	10008	13151	13704	11856	13805	14535	12341	11729	21244	12818	11982	15666	22083	19071	17282	16054	14100	14758	15805	16172	20311	17788	17007	12624	15944	12932	14695	18185	21526	15404	13408	16682	15885	16286	11965
34:01:01	34.0169	17066	21189	19054	14716	17037	12083	15818	14497	16434	19543	14113	17514	14851	11725	14412	13856	12970	12417	14619	13290	13560	19729	18606	12919	12252	20155	18092	18252	16931	16332	16210	16328	16792	21539	17906	14725	13543	14640	13480	19180	16957	17054	12919	13716	21079	18775	16666	15396
34:31:02	34.5172	16239	18628	17543	14961	14290	13923	15531	17358	17569	20109	13396	15476	16096	13429	16699	12497	14602	15079	17695	15615	14168	19851	16834	13387	13299	18995	17391	18134	13151	15877	12830	19012	18552	20910	20362	20417	13548	14535	16619	17754	12839	19919	13345	14400	19488	19965	17974	16083
35:01:03	35.0175	16071	19944	15231	12316	14088	14510	13974	17754	16041	17231	18936	15661	16151	13775	13256	10522	15661	15990	19079	14429	16138	19320	17978	11927	18083	15910	16801	16159	15037	19066	17151	17214	15581	19391	16754	20058	13003	18121	12526	15885	14636	16324	16062	10455	14974	15518	17117	15771
35:31:04	35.5178	13868	22210	14261	10843	16231	15746	12337	18948	12674	20353	18307	18957	16999	11181	11113	15564	17885	18758	18387	10847	16750	19552	16813	12965	17328	22961	17779	21315	14704	19037	16915	21050	19210	22628	21391	21358	13830	19501	16349	18147	11881	20661	19324	19395	16214	21488	19644	17872
36:01:05	36.0181	15927	21813	12518	11294	11607	19311	15134	23552	13206	18455	18033	21978	16341	19092	11565	12750	16379	19488	21273	12210	14978	20349	20311	14223	16227	23986	25699	24691	20294	21083	22016	22944	25092	28615	30974	26003	18113	24775	18767	27535	27539	19653	23809	25134	24408	25725	25514	19543
36:31:06	36.5183	24682	21999	22860	12522	16028	22109	23239	23674	20180	26818	18471	29349	19965	21176	13674	17851	22518	24754	22915	14805	25037	26223	25429	20476	27003	35025	29564	35957	25944	28902	26425	29978	33750	38865	32278	30176	23919	29649	30033	34586	37160	19134	32392	36907	33750	33058	32379	24691
37:01:07	37.0186	31999	32742	31160	20847	24526	28628	36835	30957	30100	35071	31577	38979	28978	26742	26126	20252	28029	27193	26927	15180	26923	37713	38460	27155	36666	42232	42557	42929	37991	40954	35852	36696	41447	42971	36434	39249	29915	34539	28746	39780	39451	32430	42355	30573	48182	35822	42996	27518
37:31:08	37.5189	39823	46144	37645	29809	30046	25573	44258	31008	42599	40338	36324	38763	28379	27088	31717	27623	33641	26902	30843	28172	26585	40291	32451	27927	46693	47587	47528	42224	44165	36025	40671	41262	51656	41392	41743	43988	33881	39827	31143	46191	50638	47022	43275	36194	52280	36818	36974	29012
38:01:09	38.0192	46545	47836	42743	41148	44752	25328	49803	33506	43557	45634	47317	46364	31354	34320	44891	35059	35417	28834	35476	32122	32577	48697	47820	33729	57446	52668	52998	49440	47663	51660	46549	48098	58729	54838	55281	49140	36198	49444	37578	43557	53715	52166	54627	49301	67929	41219	42798	35088
38:31:09	38.5192	48153	56986	44038	48360	47220	26628	52192	29843	50926	43232	38742	44671	37244	37759	39316	41418	34510	34160	36730	31316	36865	51609	39148	37054	57285	58159	54542	49119	54842	53192	45899	49790	59763	49111	53605	46068	38261	48739	39063	57412	53466	64186	53449	50731	60434	45726	49723	31953
39:01:10	39.0194	51293	55652	47262	48993	58184	29054	51651	35514	56091	45195	43992	56095	41506	46600	50525	42604	40793	36751	44684	36253	39650	54880	47241	35599	62295	61316	58973	56986	49191	59037	47739	49461	61801	47068	55411	60391	41063	52909	41017	46237	57463	63451	52242	44308	69478	44443	48119	32873
39:31:11	39.5197	54985	56690	49748	49765	59881	30316	56838	39236	55340	53339	51504	56758	44346	48001	44313	40249	44030	41924	36898	42557	44325	63970	44642	39683	61328	57948	69444	64747	47929	59855	48625	51807	55264	55547	61388	53711	38936	51335	46477	50887	51364	59463	47043	45380	64747	46081	51634	37067
40:01:12	40.02	58665	61037	53365	56150	59915	33873	60738	40439	66119	49263	54614	61366	50465	51204	44654	52470	42435	41219	41013	43481	45798	65211	50001	43435	66186	58990	60792	54437	53812	63776	48094	58247	67891	57931	49090	58243	42658	56306	46144	52487	61700	69845	50149	50415	71238	51829	48195	37000
40:31:13	40.5203	62101	53989	52065	47372	62426	36552	55310	41249	63869	49191	52365	66553	48647	48963	49811	41359	49372	41979	45790	39523	43502	69647	49233	47760	63274	63422	62497	62417	58370	67089	60598	51436	61041	56488	55610	60244	43566	53230	45469	50816	62118	68575	63380	51706	73458	53116	51242	41616
41:01:14	41.0206	64190	60425	51968	56264	60113	33636	56711	42654	66287	57336	60978	58332	52322	58020	57935	54825	44650	44064	50879	42228	44705	70419	56614	49115	69448	64426	64346	56040	54935	60636	50651	54749	56943	60531	65207	56813	45313	60788	54044	49402	65055	62780	51909	56559	72973	48457	50600	43435
41:31:15	41.5208	60873	62004	51162	46925	61624	28227	52934	43937	61923	57091	65080	62628	54445	54998	65697	49799	43536	50326	40055	35814	53732	71736	48056	57606	79983	62544	63329	61463	53441	65718	52436	55276	65173	61455	62983	56053	44532	53850	45882	59206	66135	70419	53985	51090	77848	51001	54449	39894
42:01:16	42.0211	68204	56948	51200	52107	67313	35742	58560	41274	59856	58138	61041	60531	53474	53006	54686	56906	51048	52601	46093	50905	51858	61995	63054	50854	71441	63671	57678	58146	61278	62822	54766	52981	66456	59915	56319	57370	47157	67262	45275	51664	58269	68431	55741	47148	83086	52284	60151	41869
42:31:17	42.5214	58551	58058	50149	47385	65401	33535	51398	39827	63464	53905	64118	70960	51141	55428	50423	55167	46714	63004	54580	41338	51668	65616	60092	56965	70314	60915	72049	60771	59168	71588	53306	51613	62177	56602	57699	52816	48604	52462	52301	53019	60130	66730	54264	52500	67174	47554	50550	37835
43:01:18	43.0217	57788	59277	48102	47815	65519	30868	58999	38173	58294	51757	57353	64667	57838	49524	50465	49596	44043	52576	51892	41532	48689	77603	51221	54863	70453	61628	59058	55551	62573	63384	43051	52951	64249	58707	56863	60754	46621	52078	47030	52753	58564	66389	54559	53217	80106	47393	52432	35759
43:31:19	43.5219	59754	54728	46908	56137	57395	28451	59805	38873	56931	48647	61143	62860	51335	48296	59611	49959	48663	46992	51191	45536	48410	70837	58513	53753	68934	61822	61856	65819	55192	60058	44043	53635	59898	53740	60898	57522	41143	50803	47743	47874	61054	62903	56910	51664	78346	46802	52331	37476
44:01:19	44.0219	60826	53280	43570	46148	62658	28037	55703	42013	59476	45735	53588	60172	51086	50613	57868	44887	51187	43372	41477	39658	46216	70554	49533	47102	62033	59560	62839	51352	51385	60835	50153	54884	62645	51225	58049	54951	45477	49351	46587	46359	61991	61109	46207	54175	67334	46781	53187	34814
44:31:20	44.5222	59290	48132	45414	49752	54563	28126	54124	37375	51284	50368	48030	52280	48849	47566	54044	32915	49634	53124	51238	46385	44895	67718	50466	46638	64477	55243	63265	59830	58661	60759	44422	53466	59855	50719	47191	56775	39439	54968	46376	45169	58746	63114	50786	41966	74260	44051	49537	34058
45:01:21	45.0225	52622	48448	42384	41295	55103	28856	50394	35738	49309	46988	44785	49377	45055	36270	46777	46233	50512	52875	42595	48102	48090	65739	56830	35645	58087	52145	51516	50225	46629	53647	43595	46608	57998	50816	53052	51744	42587	43671	42127	46562	48963	53213	46224	46119	63789	41371	46077	29746
45:31:22	45.5228	53171	49440	43557	45887	57817	25438	46929	34392	46672	45127	47364	51132	54909	40759	53238	43908	44861	48056	43393	40409	35738	58505	46431	32320	59965	53993	50723	57412	45861	62067	44587	51263	55065	48288	47153	48191	37451	43528	41308	42515	49718	49807	49275	44224	64717	43612	50858	32919
46:01:23	46.0231	49440	39667	33611	38924	50398	27007	42464	34172	48098	42498	44916	45882	41371	43562	42291	30290	39924	39991	32413	31763	33835	47123	42464	26991	49790	41371	46553	39240	43177	46663	34603	45237	47431	41143	37468	41937	39299	53833	40363	36599	45566	42553	38059	38510	68963	37320	43047	30113
46:31:24	46.5233	41160	41696	35797	35244	38696	22201	40063	29273	46714	36388	33860	38776	33075	26733	34831	23370	34438	23965	24130	30704	28577	36118	40215	24902	46807	32818	39067	34953	30535	39160	28940	33544	41093	43435	32354	35940	33945	41038	32244	31295	29210	36067	34755	36919	50293	33915	34122	24341
47:01:25	47.0236	37346	36865	38861	31459	39523	20455	27535	26889	33793	33674	32181	37928	33438	19632	27902	27733	26623	20501	13442	23581	22982	26995	34451	17016	39675	30008	40506	28843	24446	42431	24602	27109	35919	32953	39451	29408	28573	30210	20577	26126	20666	31434	29628	26539	43979	34253	33088	17176
47:31:26	47.5239	30894	25552	27906	20370	34936	18037	25126	25223	27400	33257	21493	27379	31269	16505	25771	16147	25889	19087	18138	18079	17712	17480	28121	13514	34008	20307	29147	26733	31295	27400	19619	23484	36801	31046	28269	26434	24252	28531	16172	25661	26185	26560	21412	25488	41380	27940	28602	20990
48:01:27	48.0242	30193	33611	31012	25948	29218	15725	19341	25931	28033	29801	22269	23742	23476	11991	20294	12273	17598	18788	12121	15674	14712	14708	18075	15809	25168	18138	24142	18037	23653	27239	14678	19446	23366	23294	20383	22142	16033	19201	17644	18898	26488	16244	21362	18805	28590	17944	23066	11851
48:31:28	48.5244	22298	18919	18944	18480	19695	14277	17007	12624	20467	16362	18699	20644	17505	12391	16126	11244	16569	15666	17396	11898	16839	16720	15379	8843	20568	18779	20349	16016	17674	24906	15649	18678	18244	20138	19822	17986	14518	19033	18087	17720	22636	19923	16484	16269	27088	17484	19471	12159
49:01:29	49.0247	14885	15463	15231	14016	18400	10501	17425	10898	15092	15362	16944	16763	15632	11674	16522	13067	15467	14147	18552	9607	15940	18269	16210	9041	17210	14670	16467	16193	16729	19201	13037	14126	17699	18455	14202	14493	12037	14978	13632	16526	15893	14784	17674	12797	21851	12877	13628	9050
49:31:29	49.5247	12429	13805	11826	10986	14358	7780	12083	8219	13919	11961	12016	13590	14045	11856	12683	10594	12581	16012	16501	8392	12881	16742	13737	10818	15425	13071	14121	14771	12691	16763	9746	12100	14792	13927	13446	12661	8835	11586	12489	11653	14400	10742	13024	10940	19138	10754	12168	7877
50:01:30	50.025	10480	12944	11223	9995	13759	6527	11510	7636	12590	11889	9894	12894	10822	11362	12168	9898	9792	10927	10430	9223	10919	14801	14910	10936	12649	11459	11619	10712	11974	13974	9522	9168	12438	12522	12598	11851	8012	11299	9560	9835	12636	11619	10662	9198	18092	9033	10691	6919
50:31:31	50.5253	9560	10434	9885	7590	10995	6059	10176	6991	11455	10214	9248	11328	8544	8219	8704	8949	10311	8679	7949	6181	12514	15155	9404	9544	11978	8987	11320	7852	9029	12244	7932	7434	9991	10358	10577	8333	6442	9063	8847	10425	9889	8712	9430	8556	16332	7303	8636	5911
51:01:32	51.0256	8544	9641	9717	7434	9877	5670	10333	6489	9750	9075	9282	10514	8670	9636	7691	6451	7392	6814	6810	6033	8257	12834	8160	8864	8987	7776	10012	7738	8425	11632	6303	6949	9957	8387	8607	8143	5864	8020	8139	7746	10408	8147	8396	7738	11999	6704	7670	5008
51:31:33	51.5258	7480	8539	9016	5848	9565	4873	9181	5924	8691	8565	8143	10341	6472	7974	6843	5324	7071	5814	6725	4848	7105	11493	8328	6945	8687	6742	7793	6885	7392	11235	5481	5624	8510	7075	6670	6645	4865	6544	6451	7970	8387	7067	7080	6084	11257	5590	6649	4253
52:01:34	52.0261	8084	8320	8075	5523	8139	4384	8206	5696	9003	7442	7615	9041	6700	7193	6383	4890	5168	6172	5350	5084	7219	10978	6540	6143	7915	5793	7755	5738	6974	8518	5379	5763	7704	6658	6480	6248	4514	6375	5286	5586	7603	6848	6818	5628	11358	5472	5565	4092
52:31:35	52.5264	7307	7691	8290	5004	8151	4244	7873	5502	8122	7088	7046	9037	5468	6362	5523	4249	5535	4548	4654	4371	5548	8902	4670	5413	7358	5489	6388	4987	6075	8788	4746	5000	6502	5902	6434	5962	3810	6582	5873	5324	6831	6198	5654	6367	9679	5105	5059	3671
53:01:36	53.0267	6983	6793	7025	4586	7869	4240	7835	4886	7725	6945	6801	8219	6270	5721	5249	3877	4523	4156	4308	3489	5426	8286	4299	4628	6493	5194	6750	4873	5902	7371	4649	4552	6670	6029	7480	5101	4160	4768	4818	5586	6687	5392	5759	5662	9366	4620	5295	2924
53:31:37	53.5269	6421	6278	7037	4734	6932	4004	7666	5531	7923	7189	6784	8151	5265	5042	4835	3586	4455	4548	3810	3755	5468	7653	4957	4805	6915	5329	7198	6097	5270	7607	4443	4405	7050	5582	5970	5362	3983	5126	4966	4595	6734	5751	5443	6126	8560	4590	5341	3666
54:01:38	54.0272	6118	6831	7054	4708	7417	3751	6375	5291	8189	7615	5940	8054	4679	5050	4476	3493	4278	3827	4139	3375	5502	8839	4569	4907	6594	5270	6037	5375	5257	7164	4388	4097	6046	5738	7518	5080	3662	5118	4438	4565	6405	5421	5822	5717	8759	4325	4831	3763
54:31:39	54.5275	7371	6869	6455	4527	6932	3704	7704	6476	7556	6725	7362	9278	4818	4919	4974	4017	3734	3671	3476	3502	6274	7717	3822	4641	6742	4877	6210	5114	5953	7527	4447	4797	6822	5645	6109	5729	3831	4768	5185	5388	5915	5367	5552	5696	8847	4362	4649	3671
55:01:40	55.0278	6852	6666	6666	4780	7940	4590	6708	5704	7244	7105	7105	8632	4805	5493	4291	3759	3696	4160	3869	3519	5438	7679	4232	4430	7379	5312	7177	5025	5814	7860	4514	5177	7101	6518	6620	5105	3970	6476	4928	5945	6831	6413	6198	6278	10379	4886	5409	3759
55:31:41	55.5281	7388	6531	7286	5481	7282	4919	7147	5894	7923	6831	8075	8662	4810	5384	4713	3536	3789	3827	3742	4071	4746	7645	3713	4185	6881	5375	7442	5396	6333	7898	5295	5464	7118	6143	6362	5805	4941	5852	4818	5827	7312	6109	6721	5729	10463	4822	6046	4430
56:01:41	56.0281	7421	6995	8223	6223	8628	4687	7940	6253	8092	8008	7506	8333	4358	4987	4742	3886	4017	3839	4392	3995	4552	7784	3957	4628	7063	6738	7181	6198	7033	7809	5151	6105	8501	7569	7337	6632	5303	7333	6037	5599	8430	6750	7328	7480	11062	5991	6282	4915
56:31:42	56.5283	8223	8577	8797	7223	8750	5759	7847	6890	7742	8615	8337	9387	5080	5502	5742	4278	4097	4814	4181	4502	4557	8299	4586	4827	8632	8079	9236	5506	6974	9476	5687	6227	8164	8830	8231	7472	6544	8257	7307	6535	8818	7826	7847	7928	12940	7189	7696	5481
57:01:43	57.0286	9843	8025	9071	7687	8392	6181	9645	7012	9126	9598	9341	9586	5666	5957	5932	4919	4219	4763	4675	4763	6194	8830	5088	5548	9560	9046	9468	7172	9805	9598	7426	8067	9219	10695	9020	9349	7139	8603	7670	8269	11020	7809	8058	8560	14729	7620	8105	6531
57:31:44	57.5289	10763	9333	10860	7620	10067	7160	10029	6945	10290	11210	9236	10653	6004	7809	6894	6278	4763	5257	5637	5109	6788	8248	5434	7130	10476	9501	10160	8383	10016	10400	7915	8628	11581	11700	10729	8544	8020	9915	9282	11121	10839	10273	7628	11429	14189	9717	10273	7442
58:01:45	58.0292	11860	11147	11290	10472	11978	7624	11687	9084	11012	12231	11345	12501	7556	7991	8206	6856	5687	6455	6624	6983	6831	12159	7472	7885	12636	11598	11539	11662	11662	12666	9404	11999	11847	13024	11733	12121	9451	9788	9413	13733	12083	12459	9552	12425	16531	10712	11311	9020
58:31:46	58.5294	14467	12370	13214	12505	12843	9214	12834	10210	14450	12944	12294	12206	8485	8442	9801	8944	6974	7485	8337	9641	9337	12451	9927	9624	12455	11337	13020	11598	12121	12885	8839	12391	14303	13666	13324	12105	10261	11974	9767	10489	13079	11835	9003	11522	17421	12062	14864	10299
59:01:47	59.0297	13303	11818	12957	11953	11737	8573	13218	12134	14695	14324	12235	12725	9409	9354	10974	9020	7603	8877	9860	8510	8759	13273	10147	10185	13353	11763	13687	12674	12940	14421	9421	12771	11645	13965	13763	14556	11261	13256	10383	12716	14142	13185	10311	12231	17623	12548	15885	9843
59:31:48	59.53	16016	10911	12851	12252	11328	11214	11636	13109	16261	13526	9430	15324	10518	11801	10303	8497	9392	10704	11273	9522	11046	12244	11978	10505	12695	10020	15071	11932	13029	16134	8620	14079	16269	16493	17467	14425	13674	15978	11657	12805	15353	13961	12661	13780	17125	11159	12885	10919
60:01:49	60.0303	13307	11944	10493	9383	10134	12197	14176	11725	14197	17611	10387	19109	10670	11944	11062	10084	10484	12438	12218	10763	11543	15767	14231	11020	15822	14412	18746	15501	17231	19598	12320	16965	22801	22438	21459	17041	14792	16442	16957	16189	17096	22109	16725	16159	27206	15569	17556	15687
60:31:50	60.5306	14358	15396	12573	14282	14577	14598	16598	17653	18083	22092	14261	21353	13805	14830	15695	13362	13488	14383	15509	9911	14425	15404	15100	15138	23463	20746	22649	20172	22927	27695	19995	26598	25535	26337	24117	24218	19244	23024	21661	27058	20374	25476	21539	22176	34451	22252	19784	20303
61:01:51	61.0308	23619	14349	17429	19358	17809	18636	20341	19670	20307	22526	16223	24349	15062	18210	17450	14953	15868	13611	18990	11910	15628	19379	19682	16459	28172	21801	27315	20324	24919	28678	19142	22931	32354	25109	25742	24471	24792	26092	23788	27721	22927	28792	27083	23552	39418	21687	24476	21699
61:31:52	61.5311	24826	23746	30484	20754	29843	21505	27256	23577	30868	29927	24657	32822	19033	21168	20547	20366	17594	17088	18552	12607	19045	27881	23682	19982	33050	24088	35037	25543	24526	32206	25594	29476	38582	31387	33400	30733	28290	30822	28843	22948	30603	33143	29408	28704	39937	24374	27767	24218
62:01:53	62.0314	28417	31835	35037	30430	33324	21244	36514	23379	36835	35033	34801	34244	20716	22180	23303	19931	21459	19455	19839	14906	24619	27066	20868	22311	37350	30130	35856	32387	31468	38371	28370	30649	40599	31354	36624	32033	24501	30750	28607	33687	37325	33219	30970	30155	45984	25801	30413	25497
62:31:54	62.5317	36772	33396	33434	31940	36911	20471	34316	27240	33683	35295	36215	36109	22155	23830	26261	19471	22298	20471	20168	19104	20628	30531	23142	25758	36025	31628	38295	29020	33666	41874	28961	29598	46380	31902	34126	35147	27953	31117	34067	30548	30429	39856	37645	31581	44055	27332	34455	23678
63:01:55	63.0319	39329	36194	36105	38679	40008	21007	36396	29750	38645	35025	37367	40013	25058	30603	31822	25104	25223	22716	23754	22336	26569	33286	28459	28345	39806	38206	42236	31134	39696	46351	30687	38278	45984	38772	38363	32565	29767	33780	30003	37270	44186	36713	34286	34299	41911	28130	36654	27687
63:31:56	63.5322	38941	37789	35793	32501	38139	21805	37962	30404	40565	39591	35016	39291	27796	31965	29345	25307	24311	23079	20037	22307	30100	38835	29062	26349	42680	32746	39329	32873	32818	42393	27915	37822	49845	37493	38105	35341	30181	48208	36037	32894	38219	38017	36291	32282	44207	28868	32645	27092
64:01:57	64.0325	38666	40249	40890	40101	40895	21936	36991	30527	38603	37611	42279	40072	30121	30130	30902	25906	23050	24885	29560	25003	29737	39873	29581	29737	47524	36050	39131	32535	36565	41460	29970	34928	55897	34810	31746	34396	31088	38228	36970	34898	34025	40882	43460	32657	50676	28965	35206	26809
64:31:58	64.5328	40443	36561	41650	42464	45802	21045	41367	38160	43363	37953	43460	45709	32155	26818	35924	33130	25577	30898	26379	28822	28244	46418	33523	35430	43232	37645	42009	36641	35371	44684	34649	36523	43540	41734	36388	35928	31852	38067	36118	38266	43372	43203	37413	38582	53432	29716	38190	25450
65:01:59	65.0331	39135	37232	36535	34712	43224	20307	43971	32809	38759	37920	41177	44739	31712	22822	33641	29712	32383	27721	24720	25758	27223	43680	36708	28413	44996	38194	41287	33734	34961	49124	36409	37059	51786	44536	40283	36206	33122	44346	30548	44747	46364	39072	44313	37434	55095	29088	39578	29307
65:31:59	65.5331	42498	35653	39337	37303	42557	21269	39696	30387	43004	48195	42317	47469	33219	34746	36949	30691	32746	30362	29400	26569	30822	47832	31126	32995	48769	37595	42717	40890	38974	43249	41409	39080	49828	39886	34966	41806	31147	41388	41249	44194	45148	45418	40409	36468	56154	28075	39489	32261
66:02:00	66.0333	44996	37987	39768	42393	46853	23189	39088	33873	40055	37054	37924	45309	35827	43722	29564	38409	24906	29569	26362	29624	37173	45423	28742	35531	44895	34831	41819	32202	36316	40186	35704	36822	50402	45646	38658	42777	29733	40169	39316	35168	40721	37886	42485	33341	51715	33565	39380	28396
66:32:01	66.5336	41553	39185	36413	35531	43051	25699	40219	36278	38042	36641	36506	44397	33750	33400	31100	33265	26286	27666	26813	32755	32695	52377	30995	33155	46342	38645	37447	39177	33923	46009	38059	39388	47452	37329	36911	42608	31510	37911	37097	35978	39502	41464	45000	31847	53390	32636	35329	28493
67:02:02	67.0339	45397	37502	36367	36898	48043	24172	40785	33506	37949	41844	39375	44946	32911	36607	33881	44633	27645	30100	30763	25311	35151	42912	38202	36177	55205	45705	46600	35400	39785	42874	35388	36814	46064	38350	40958	39515	29653	42620	37405	35265	43992	43764	45093	38510	54226	28341	36337	26813
67:32:03	67.5342	45503	38223	36886	35253	47452	23020	38915	32814	39531	35911	42350	45671	42439	33603	35299	31240	27307	31725	30856	28830	33573	40283	39561	38869	44410	41852	40456	33603	39595	38721	32894	37438	48427	42207	38704	34704	27721	46224	38114	44342	42658	40928	37152	33434	49174	35649	35801	29029
68:02:04	68.0344	43064	32733	33409	36253	43080	24138	38477	29269	37274	35658	32223	43245	36282	28404	42051	30767	31805	28974	26809	27307	32565	34160	40034	38797	46769	36071	64165	42798	35548	41418	34206	40692	45195	34810	40987	38076	28337	37270	33603	37455	39612	44119	44946	34392	51854	28695	35156	26514
68:32:05	68.5347	40388	35282	35481	33261	42013	25450	37434	31712	39865	40814	39274	43245	38114	33109	34071	28328	34945	29822	28628	26138	42017	40768	39768	34641	42346	37261	41578	41249	35822	46089	38114	36476	49816	33303	33911	38768	26539	38519	37173	46558	39367	40654	47537	31193	50525	25370	39169	30472
69:02:06	69.035	32463	28548	29379	32252	39029	21298	37468	30202	37109	34198	35552	39308	34544	35067	39903	27560	28463	32303	29518	24159	32666	46393	33624	33907	41295	31383	36358	31835	30535	48123	30358	37772	45562	32755	33763	34067	26526	38789	35042	39287	39114	37898	32354	30919	50360	27172	31725	25484
69:32:07	69.5353	33594	27552	29970	29759	37287	20033	36080	29704	33122	33109	34898	40624	37156	27704	36211	31712	29982	25674	26501	22678	31953	42312	38122	22775	40042	30265	31860	34624	31062	35957	24944	35987	36004	27754	32835	34582	24037	31155	33582	32290	33923	37168	37354	28860	45241	28113	33248	22974
70:02:08	70.0356	31286	29856	31105	25687	38177	17678	33219	28155	30522	32598	32063	38101	31396	29742	33738	26307	26898	21408	22024	20071	21252	35316	33974	16421	33890	35350	37671	29062	26345	28856	26299	31008	42730	30721	33324	29012	27581	34485	28193	33611	33012	32919	35962	26412	50254	23408	35527	26201
70:32:09	70.5358	34257	24336	30889	27341	31645	18910	29121	25370	29750	29910	30767	33746	29662	27607	32164	22729	20252	18075	19260	21239	19758	26463	28033	15640	29159	30906	25590	26556	26303	27442	20644	27708	33269	24805	27961	22940	23577	32843	26311	23311	24889	26569	28771	23851	43009	21197	27332	27396
71:02:10	71.0361	30518	18379	27961	23134	28003	17843	26358	21535	29391	27864	25138	25792	23134	20003	23708	13020	19716	18467	17758	17404	20509	17484	33772	14725	29341	24109	25058	25535	26497	20277	13687	25978	29210	26121	28657	20214	20244	28248	18910	20185	23564	25062	26450	19282	36607	24695	24982	17142
71:32:11	71.5364	28767	24185	27446	23092	32105	17505	24349	22560	25834	29126	24687	23720	22881	16442	25915	13872	19834	15408	13459	15480	15353	13834	20813	8105	33915	21775	26028	25661	25172	24847	20298	22619	25780	21602	21619	24999	18877	24028	20615	22889	19075	21936	26024	20982	40937	22509	25691	17885
72:02:12	72.0367	26670	20079	22636	22113	26834	19033	21914	18885	26455	26999	26366	24092	20206	14315	21556	18159	19417	16619	13991	13894	12708	16936	22324	11484	26636	22695	21809	21552	24417	26526	18628	27813	28915	21400	27872	20142	18653	34442	26505	24277	22218	20644	23159	22256	32417	18957	23725	17050
72:32:13	72.5369	26645	18598	21425	21817	23632	13640	18826	17569	24075	19741	24560	24066	20345	16189	21771	13324	19914	21113	10738	12265	18239	24024	20147	13906	27463	25193	22552	17223	19746	33075	18362	24054	27007	21134	24244	22341	16704	22282	26299	23303	23349	23780	25649	17509	32881	16906	27379	16265
73:02:14	73.0372	17784	16429	17670	17079	23931	12868	20699	15252	19218	20704	18362	21632	16020	18320	18628	12332	18661	19214	17303	13965	17455	17303	18796	14493	24125	18050	18404	18952	17746	27349	16180	20746	22763	16083	20336	18345	16391	19691	22957	22349	21573	19079	23860	17484	31632	15704	22611	14910
73:32:15	73.5375	18227	15817	17315	14691	20910	9949	18590	14640	20345	18151	20016	22590	18644	16931	18961	14117	16277	18433	15185	11805	15113	19602	15682	13982	19450	17750	17898	21872	15552	24809	16640	18442	24163	16256	17581	19674	13978	21704	18788	16889	20134	17750	21948	16535	24505	13109	19024	13725
74:02:16	74.0378	16881	16893	20725	13936	17695	11176	17775	11970	18784	16239	18670	19623	15602	17117	16607	13733	13126	13096	13927	9075	15037	17408	16961	13121	18657	13889	16569	17028	13910	18843	13830	17210	19885	15472	16957	16623	12539	15999	17176	14893	16864	17193	20066	14016	23708	13940	18320	10754
74:32:17	74.5381	16488	13379	17598	14809	16050	10206	18096	13366	17834	14851	15556	19054	12839	17358	15581	11645	11058	12366	12379	8493	14809	17547	14379	14763	19007	13969	13632	13379	12699	21421	13037	13834	19395	14379	16341	14750	11674	15028	15864	17725	15488	15877	19522	11898	27598	12581	14467	9746
75:02:18	75.0383	14358	13311	16404	13079	17290	9328	14716	12438	17801	14299	14851	17750	11543	14265	13645	10227	10417	12210	12927	8324	12957	17864	12826	13611	14421	11556	14092	11235	12016	15995	10873	13054	16480	13632	13725	14877	9944	14944	12919	12109	14180	13961	14324	10649	19746	10193	14556	10598
75:32:19	75.5386	14294	11759	14944	13311	15577	11657	17088	11636	14881	13834	12775	16446	10995	11459	13400	10075	10691	11514	11041	7831	11813	16746	13286	12071	16066	11269	14033	12092	10493	17957	10894	11105	14948	11683	13581	13113	8463	13248	14180	9927	12421	11700	14788	11493	20881	8345	12569	7915
76:02:20	76.0389	14780	11835	14353	11328	15742	9240	14404	10231	14830	16151	13315	16151	11535	11016	11577	8645	8776	9155	8978	6713	9839	13754	13307	8906	14020	11552	12548	9476	9915	14412	10898	9957	14531	10206	11451	11645	8830	11733	12109	10333	11830	11716	16206	10813	16383	8198	13020	8320
76:32:21	76.5392	14159	11214	13417	10864	14286	7826	13109	11915	14940	13400	13421	15573	10759	9679	9839	6915	7316	8755	7835	6409	10480	13282	11467	8928	13235	12083	11505	10881	9227	16286	9126	9970	12543	9830	10771	11033	8278	10915	11894	11370	11539	10733	12932	9375	17265	8008	10738	6540
77:02:22	77.0394	13539	11788	13269	11303	11307	7316	12113	10818	13332	11349	12071	14948	8712	8704	8117	7156	7312	8425	8303	5189	9771	15564	10607	8025	12965	9902	9522	9067	9126	11737	8071	8354	12965	8307	11299	9911	7624	11164	10307	9632	10472	12337	11181	9497	16986	7172	10877	6578
77:32:23	77.5397	12708	9189	13518	9738	14830	7784	12834	10695	13164	11590	11700	13041	7708	8750	8919	5670	5459	6502	7037	5038	8025	13142	6780	6801	12809	8337	8919	8434	9657	11721	7594	9101	12704	8215	10653	10763	7510	8991	10505	9164	10641	10273	11307	7907	16839	7624	10176	6122
78:02:24	78.04	11995	9442	11130	9058	12244	7535	10695	8987	12742	11991	11459	14375	8366	7493	7847	5527	5291	7409	5856	5620	8400	10316	7392	6907	10050	8476	9679	7523	9012	11134	7691	8269	11290	7518	9535	9463	6776	8362	9413	11307	10071	9328	10265	8497	16784	7400	8780	5708
78:32:25	78.5403	12526	9181	12358	8493	12472	8379	12763	9818	13611	11159	12092	13303	6379	7991	6894	4843	5232	7755	5421	4957	6810	9619	6320	6223	10096	9037	9649	7712	7932	11206	7396	7472	11181	7573	9041	8409	7286	9248	9037	10210	10333	9189	11067	8856	12953	6949	9582	6814
79:02:25	79.0403	11240	9839	12919	9468	9231	7755	10965	10012	11894	12079	10742	13328	6683	6299	8029	4628	5249	6122	4886	4751	5907	11202	5459	5932	10569	8531	8624	7240	7012	13045	6961	7607	10809	7788	11071	7869	6793	12223	8117	8063	9822	9354	10932	8350	14210	6759	8835	5067
79:32:26	79.5406	10278	8063	10172	9096	10155	6721	10160	8847	11725	11147	9830	13391	5535	5696	6151	4654	4776	5801	6405	4797	6442	9721	5586	5270	10518	9075	8978	7320	8354	11712	6966	8447	10889	7307	9362	7860	5696	11514	8839	8729	8101	10733	8822	7303	10691	6869	8873	5126
80:02:27	80.0408	11624	8054	10193	9586	10949	9987	11303	9231	11835	11826	11927	12501	5827	5936	6983	4776	4400	6122	5438	4696	6177	9611	5270	6945	9544	8674	8088	7544	7333	8999	7358	6696	13235	8413	9303	8548	6907	10214	9071	9839	9539	8885	9607	7552	14725	7075	8459	5915
80:32:28	80.5411	12151	9185	12691	9455	10742	6649	11560	9552	12054	12206	11172	11999	5654	5257	6531	5594	4329	5751	5303	4911	6320	9366	5396	5270	9847	9138	8358	7712	7683	11598	7248	9176	10776	8240	9987	9717	7438	8607	9160	10632	9518	11463	8708	9193	12961	6860	9797	5713
81:02:29	81.0414	12244	8645	11560	9387	10328	8172	11071	10130	12459	10594	11328	12442	6130	5417	6780	5303	4742	6075	5156	4856	6029	8666	6168	5578	10362	11197	9105	8101	8434	10683	8312	8590	12062	8261	8691	9582	7468	10265	8999	9822	10041	10257	10362	9371	13450	7531	7869	6421
81:32:30	81.5417	11847	8839	11328	11257	11729	8814	12252	9670	12602	10797	10046	13278	6265	5632	7809	5071	5582	6662	5805	6126	5704	8299	5641	5835	9750	8961	10037	8358	9299	11476	8362	9122	13227	8877	10425	9822	8898	12008	8877	9852	10923	10387	10864	8742	12041	9206	8683	6826
82:02:31	82.0419	12856	9586	13286	10784	11197	7388	10527	10210	12235	11856	11602	12982	6059	6143	6236	6156	5375	5396	6485	6215	6172	9337	6447	6540	11008	10261	9333	9122	8645	14421	8957	9940	12294	10067	12797	9991	8143	8953	9776	10147	11008	10603	10366	9535	13969	8949	10636	7160
82:32:32	82.5422	12974	11493	13501	10050	11725	8624	11467	11130	12029	13725	10164	13927	7902	6261	7350	6894	5814	7303	7480	6881	6371	10286	8160	6907	12037	10476	10552	12299	9704	15813	10666	10556	13552	11278	11552	10489	8839	12328	10320	9923	8966	11088	9666	10421	14856	10219	10392	9122
83:02:33	83.0425	14172	9063	12763	12256	12775	8202	13058	10666	12332	13396	12982	12805	7320	7299	8404	6966	6514	6004	8510	6105	7645	12151	8354	8067	12602	10999	12223	11033	10138	13826	10978	10792	14893	11197	13353	10244	10244	11054	10248	13041	11915	10548	8552	8641	14999	12354	10333	9417
83:32:34	83.5428	11721	9181	12543	10025	9577	8729	11286	10843	14273	14062	13611	15514	8586	7548	8025	6662	6485	7518	8425	6869	8704	11788	9780	8670	11408	11054	11885	11307	8860	14256	11826	14088	14847	10641	15320	11868	11244	10653	13467	11653	9856	11746	8430	9514	17332	11611	12552	11185
84:02:35	84.0431	13164	13083	11754	9754	11345	8885	12273	11851	14771	12792	12083	12522	8982	7772	7227	6025	6392	7729	8704	6556	6869	11940	10286	7193	11493	10160	12649	11974	11480	15653	11805	12185	14775	11505	16079	13130	11476	11670	11809	12894	11505	13666	10923	12957	16290	12472	12092	12353
84:32:36	84.5433	13303	9214	10514	10168	8818	10725	11674	13771	13197	12240	10016	11813	9586	8898	9594	6966	7046	7704	9982	7379	8695	11484	11282	7869	14438	13075	14446	13151	12569	17906	11096	13067	18412	12970	17666	13294	12995	15223	14569	16830	11193	13303	13105	13117	15206	13695	11839	11733
85:02:37	85.0436	10750	10417	8303	9535	8476	7658	8312	12164	14121	12261	9531	11303	9147	8109	10100	7763	8058	8776	11413	6966	10138	12214	10649	7856	15839	13607	15425	13623	13366	16303	11231	12991	19792	14607	15704	13278	12522	19079	13425	15623	11408	12159	13117	14636	18931	13476	14045	11636
85:32:38	85.5439	16058	14683	6945	7590	12581	7168	6282	14126	14590	15653	12624	15189	9003	9560	12210	9683	9160	8569	11008	8717	10451	14096	14307	9438	16801	16231	14277	14758	13337	21239	13290	13294	19602	17071	14615	14602	12290	17906	13742	16113	13801	13117	16936	17695	19556	14290	16687	12948
86:02:39	86.0442	16961	15134	18400	10396	10539	11894	14628	15054	16434	18526	16564	16033	9446	10025	13767	10181	9063	8442	10168	8324	11847	16518	12548	8624	19817	15092	17155	16007	12497	20906	15569	13750	24944	18590	16252	15104	11227	20885	13611	20218	16505	16708	15982	15780	21674	13501	13636	12138
86:32:40	86.5444	19387	15484	19467	13189	16611	12729	17497	15332	19915	18969	17539	18037	9409	10012	12054	10911	9396	9771	10843	10809	11117	16771	16206	10269	21071	17041	13927	14691	14708	22923	14012	16661	21294	16518	16780	15079	11619	18813	15054	20750	16666	16480	15552	19075	26889	15552	14396	12847
87:02:41	87.0447	19784	17834	20687	15012	21349	11429	17817	18012	22362	19024	18826	21197	10873	11155	14556	11864	10801	10543	13906	10565	10569	16948	12666	10231	18218	16159	15636	15923	15155	18961	15526	15923	21189	17505	16986	16142	11894	18674	15037	18830	16303	18425	16016	17265	20940	13767	15159	13278
87:32:42	87.545	22657	18547	24864	17332	19543	13910	20522	17121	19408	20910	22408	20682	11999	9830	15442	11206	11404	9079	11797	12151	12045	16607	14535	12902	21324	19860	16826	16687	14391	18598	13969	19223	21914	16834	13868	14780	11121	21197	16514	18062	14142	18514	20771	18163	27792	13721	15678	15682
88:02:43	88.0453	20442	18206	19906	19362	20476	14467	22277	16788	22484	18569	20142	20260	12092	14142	14197	11455	11754	10143	10252	11780	14488	22012	15438	13860	20366	16830	18189	19944	16147	20940	12442	17172	25514	15290	18273	14915	12978	19054	14834	18687	16130	18362	19210	19505	31362	14100	15817	15771
88:32:44	88.5456	22113	18682	20885	20433	22590	11214	19033	17438	20893	19809	18657	21999	13214	12231	17801	12716	12134	11868	11902	12413	14345	20311	16885	14016	21682	17682	22704	20682	16218	21720	16754	16412	21716	17244	17518	15336	12088	19914	15324	15206	17054	19788	16779	21096	29181	15024	14569	15197
89:02:45	89.0458	18560	19476	21463	20429	21657	14615	18210	16391	22345	19720	21594	20653	15206	13024	18948	14391	11708	13936	13978	10961	14615	19442	15467	14995	21083	16742	18438	17750	16320	18480	18315	17682	28484	16497	20636	15037	13729	20767	14252	20737	18687	17050	17961	17893	26974	16961	14792	14493
89:32:46	89.5461	22417	19315	21653	19028	18493	11257	20349	19471	19168	18801	20467	23231	14062	11624	18514	12754	14109	13577	14467	12657	13611	19522	19455	17957	23404	17902	19471	17421	18134	17843	17020	18260	21666	19113	19708	16488	13864	17463	12628	17923	18893	17244	17125	17704	26484	16286	19037	14965
90:02:46	90.0461	20952	19978	23121	19834	20387	10695	18012	16556	20189	19450	20248	22438	15927	11539	18877	16666	14168	14012	17687	12442	13839	20016	22623	14910	21543	20151	20341	18100	17847	21547	16539	18083	26446	21387	21986	16328	14434	18526	18640	17666	17404	18927	18746	17872	26965	16505	14653	15024
90:32:47	90.5464	20256	17311	19505	20442	18501	9805	20851	18180	19805	17640	16986	22758	15615	16434	15484	16223	12548	14349	13674	13176	13307	16463	20404	15666	21830	16666	19868	17155	14547	21919	13969	18054	25488	22391	19754	14425	14636	18501	17050	22594	16370	17201	20822	20303	31543	15813	14058	13978
91:02:48	91.0467	22197	16910	20670	20075	18632	11113	20113	19374	16784	18282	15687	20535	15940	16501	12910	16826	15581	16763	15041	14788	10143	18041	20577	15775	21130	18737	20763	17758	19585	20066	15239	17712	25843	19442	19476	16151	14303	19497	14370	18442	21104	19054	16615	18265	27607	14948	17952	15028
91:32:49	91.5469	21581	16480	20248	19543	19729	12400	18206	16611	15780	19079	18750	23826	14868	13450	17889	15248	16531	15552	19176	14092	17294	19699	17754	12143	21623	17585	17995	18231	18425	19767	16716	19737	22311	18476	19505	19598	15615	22168	15754	16623	18784	18096	16450	15366	27493	16391	17602	14607
92:02:50	92.0472	20362	17282	20526	19868	22809	11645	18079	15176	16332	18210	17788	21931	17206	13379	18075	15421	14341	16020	17590	14269	17602	19260	20058	14446	23142	19087	21788	18509	18050	23678	16269	19290	22902	19488	20214	17261	14277	18505	18109	19366	16450	18079	18893	21927	28282	14560	16455	17366
92:32:51	92.5475	21421	15872	17885	17872	15666	11611	19311	14581	18594	16193	16872	19919	16438	11640	18058	12581	16311	16573	17125	14594	18336	16446	15607	15493	20459	17526	19568	19628	16012	21476	15809	18311	22442	18864	19750	16872	14784	19336	18176	17674	19358	17526	19417	16990	27661	17429	17189	15864
93:02:52	93.0478	22138	15573	16999	19206	20455	11628	17779	16893	18518	16615	21408	20277	17383	13636	16775	14906	16666	14746	15016	15172	16649	22328	14062	17556	21864	18531	21324	24223	18142	22661	16484	18649	23433	18809	19539	16598	15155	22277	17902	15282	18446	17033	16923	17214	28286	16261	16927	16450
93:32:53	93.5481	19792	15847	17286	16644	15598	10210	16408	17273	18109	15362	16927	19058	17952	14282	19028	16666	14716	16855	13704	14733	15126	19737	21851	15408	18957	15244	19163	17847	18450	17725	17902	16771	24282	16915	17952	16037	13661	21484	19045	18602	17843	16206	18180	15585	27969	14083	16336	15855
94:02:54	94.0483	15990	17336	18834	16531	18581	12197	17801	14805	18877	17450	17931	20733	18990	14387	21817	13742	14687	15893	16138	14771	13594	18552	19552	12092	18889	15370	18666	16767	15206	17712	15320	16737	21130	17796	16138	14796	15244	15235	16463	17227	14889	19678	15839	16885	28695	13315	17007	14100
94:32:55	94.5486	20277	14417	16771	16742	17433	11784	18463	15142	18881	15408	15484	18244	17598	15590	19598	11877	13332	13387	13632	16450	14126	18712	19370	12493	16990	13902	16725	16936	17839	18931	10442	15472	19125	17851	16872	15383	14159	16109	14172	14400	10493	14088	16168	13915	25792	14214	14649	13117
95:02:56	95.0489	19902	16172	16020	16847	17649	9970	16817	15185	18433	15256	19244	17877	15497	15868	20408	13780	12311	15012	14678	13083	13564	13155	17450	10552	19062	13067	14995	17083	16644	21877	8358	14497	27577	16691	17822	12974	12278	15509	12767	13067	14345	14687	14029	11269	20497	12881	17210	13590
95:32:57	95.5492	19185	12674	16391	16083	19227	10598	17277	14847	19075	16805	18990	18303	14953	11429	14573	14480	13269	14598	12885	13514	12961	13501	17674	9244	18957	9468	11653	13695	13645	20737	11324	15919	18362	16877	14704	13623	12978	17341	15421	13024	14855	13619	14514	10527	23058	11915	14522	11919
96:02:58	96.0494	20433	15467	14948	18138	16218	11556	18142	14307	18235	16054	15307	16180	12767	10864	16792	14240	11721	14037	14210	11881	14632	12290	15210	8312	16623	6569	14843	15041	14632	19062	13366	14661	18716	14450	16547	12168	11467	16396	16320	14691	17400	14691	14235	14172	19400	14387	13071	11577
96:32:59	96.5497	18180	14248	14615	15771	16944	10210	14927	12759	16999	13510	16370	16623	13919	9674	14602	14197	12438	13147	12742	11425	14792	15214	15771	11092	17383	12543	16227	13379	14446	21535	15104	15058	18860	14885	17459	11636	11320	14847	15974	15425	14796	12712	15695	15083	17328	11919	14729	12801
97:03:00	97.05	17079	14505	14742	14758	16050	9864	15708	11936	17020	12514	15396	17404	12358	6957	14016	12029	11358	12729	12197	10328	15632	14012	15261	11662	15607	16919	13792	14425	10624	15817	12590	15847	17113	11843	13670	13370	11387	13075	14569	13117	14767	11467	13552	12248	18830	9852	12910	12079
97:33:01	97.5503	13493	14889	13915	14927	15547	10248	15902	12894	14147	15349	15906	14982	11552	9801	13991	9889	11387	13083	12733	9223	15543	13889	13383	14142	16982	13265	12096	12716	10847	16628	10160	14822	14239	11927	15826	12024	11750	15450	12307	11674	14653	12763	13666	11100	17881	9535	12345	11231
98:03:02	98.0506	13683	13758	13628	13007	15699	9349	12932	11548	13822	13771	13936	14117	12674	11273	13683	11096	9168	11408	9826	9987	10653	13623	14623	10463	16400	11999	12577	13476	11480	13299	10046	12379	15590	10906	12417	10961	9940	15315	11223	13126	13594	12379	12265	11286	21978	9134	10463	10316
98:33:03	98.5508	15007	14282	12683	12202	15197	8611	15299	12484	14991	13860	14978	13484	11716	9459	11404	10919	9050	9455	9349	8839	12539	15142	11965	11176	12164	10683	11632	12826	12573	12661	9725	11556	13649	11147	13269	9754	8539	12969	10889	12763	13033	11273	13227	10033	22016	8835	10813	8653
99:03:04	99.0511	14830	11775	11134	11611	14227	8523	13771	10742	13796	12590	13176	14767	11138	9683	12016	8189	8898	9792	10265	7206	11332	15193	10889	9134	13948	11704	10721	9539	11227	12780	8548	11868	13923	9877	12522	8695	8501	11434	11219	10877	12037	11392	12535	10738	16353	8126	9497	8168
99:33:05	99.5514	13683	11408	10497	12552	14598	9991	13695	9919	12387	12105	10961	14438	11548	7864	9767	8814	9421	10054	7877	7501	10290	12497	9126	9223	13830	11328	10809	10792	13936	11733	8902	10552	13096	10632	10430	8350	7624	11936	11050	10687	11147	11008	12408	10619	15746	8168	9522	8881
100:03:06	100.052	12273	9493	11046	10033	13712	8552	11877	10058	13147	12649	12957	13636	10430	7615	10628	7763	7852	8413	8042	7126	11349	11164	11147	8603	13915	11733	12577	12172	9780	12358	8451	10134	14754	11067	9746	8147	7501	11552	9248	8949	10738	10392	11383	9160	14585	8244	8379	6662
100:33:07	100.552	11164	11092	9776	9835	12792	9210	10569	9742	12218	11889	11611	13404	9181	6438	9198	7088	8231	7755	8767	6983	8193	12721	10197	8295	12218	9776	8847	8835	8594	13058	7160	9476	11134	9864	9598	10265	7759	11953	8691	10742	10168	11054	10240	8991	13940	8282	9252	7620
101:03:08	101.052	13826	11556	10898	10295	12767	7679	13185	9552	13197	11548	10560	11775	9181	6662	10265	7860	7582	8662	6497	6417	9037	10151	8400	7265	13818	10100	9033	9944	8649	10379	8932	9560	13062	10100	10299	8594	8164	8303	10527	9826	10965	10510	10383	9868	14446	9290	9733	7037
101:33:08	101.552	12864	10438	9645	9295	13079	7269	11674	9008	11678	9801	9894	11396	11569	7050	8620	8029	8054	9501	8088	6548	8624	12780	8480	7556	11543	10649	8742	9704	8826	10455	8476	9915	11484	8915	12016	8168	7881	10721	10227	9138	9944	9856	10392	9096	11978	8577	9155	7514
102:03:09	102.052	13830	9754	9126	8497	12286	8231	9970	9759	11873	11189	10493	12265	9033	6607	8957	6902	6822	7248	6523	6417	7725	11548	9316	6848	12839	10345	11944	9767	9299	11088	8160	10662	10362	8598	12206	8020	7624	10742	9274	9805	9320	11476	9303	10489	15931	8569	8632	7805
102:33:10	102.553	12113	11252	9518	8130	11219	7160	9480	9265	13265	10805	12016	12273	10560	6717	9607	6620	7257	8252	6940	6755	8704	11775	7248	6561	12353	10666	11594	8451	10615	12543	8607	10413	12560	9919	10240	8603	8084	9033	9717	9244	8451	10404	10016	10370	15248	7603	10143	7282
103:03:11	103.053	14792	9198	9691	8923	12438	6826	9556	9168	12569	9780	10911	13358	8042	6578	8434	7261	7523	6379	6780	5797	6936	10915	6172	6341	12151	11168	11231	9535	8227	10704	9058	10493	12117	10037	9506	7784	8134	11923	8071	10058	9320	10573	11383	9286	13062	6426	8539	7632
103:33:12	103.553	12100	8755	9286	9750	12130	7915	10273	8771	12670	11970	11556	12202	9151	7738	8822	6523	6696	6071	6455	5375	8961	10573	7126	6805	11906	11653	10126	9172	9923	13151	8409	9463	12164	8485	11451	9679	7674	10590	9919	9236	12763	8691	9902	8396	17294	8092	10721	8219
104:03:13	104.054	12391	7421	9569	7991	12775	8358	10130	7641	12396	12986	10366	12054	8898	6147	9514	7303	6582	5983	6810	5586	7658	10092	6417	7299	10468	12438	9138	9227	9307	12868	9712	8961	11413	11172	10868	8966	8759	9063	9982	11467	9282	9531	10615	9063	16792	9164	8590	7822
104:33:14	104.554	12957	8666	9649	8974	12185	7877	10678	9210	13657	10375	9974	11674	9531	6282	9611	6746	7058	6337	7586	6135	7510	9662	7894	7303	13687	12214	9856	8877	11197	12889	8856	10016	11640	9982	10700	9679	8290	10257	9590	9814	11130	10873	9544	10552	16952	8822	8641	8577
105:03:15	105.054	14210	11117	11877	8396	11484	7712	10392	9020	14024	10518	12535	12767	10143	7455	10961	7666	7704	5552	7607	6708	6434	10493	7734	7506	12117	11257	10898	10383	11244	13936	9822	10822	12105	11602	10801	10404	10020	10041	9873	11577	11429	11759	11729	9459	16273	7919	9721	7451
105:33:16	105.554	13400	10345	9674	9181	10316	7902	8932	8451	12071	11923	12067	13218	10113	6594	10974	8063	6434	7666	8307	5772	7742	12105	9632	8771	12674	13872	10396	11033	11678	16429	11467	12041	12294	10662	11505	9830	9050	13012	9586	12526	11455	12771	11695	10358	15556	8295	12244	10362
106:03:17	106.055	15239	10932	13240	10915	13105	8725	10708	8261	11121	12366	11839	12721	10678	7894	10691	6750	7058	6514	8818	6063	8890	11864	9548	8763	11809	12404	11248	11092	12235	14927	11813	12029	12733	10687	13286	12113	8729	11543	11510	10425	11113	10514	11037	11480	14088	9548	12383	9581
106:33:18	106.555	13404	11640	13223	10320	14168	6518	12721	7345	12742	11257	12126	12316	9198	6324	10075	6725	7080	7156	8974	7206	7599	12185	9252	7455	12050	14134	11054	10826	13535	13699	11092	12526	13645	9792	12476	11003	10738	10126	10413	10792	9510	11581	11670	9864	16459	9970	12581	8392
107:03:19	107.055	15590	11046	12252	9214	12944	8012	10636	9193	12936	12341	11645	15007	10965	7202	9143	6687	6776	8012	8923	8067	10020	13341	10295	7156	12868	10392	11223	11455	10636	14197	10113	12788	15695	10489	14442	9927	9079	10164	9666	13640	11041	12463	12872	9679	18910	8523	12704	9075
107:33:20	107.556	12961	11619	12729	8122	13463	8290	11012	8944	12134	13721	10919	13910	9295	5945	8991	5983	6721	5991	8885	7712	9607	10480	10729	7156	13463	11750	12636	10337	14847	13666	10615	13704	14792	9809	12995	11193	10067	13438	10307	10645	9750	13311	10573	11565	17366	9295	15117	11307
108:03:21	108.056	15484	8295	9894	10476	13142	8307	12910	9371	15822	16501	11624	12282	8451	6679	9522	5291	7426	7130	9463	6329	8679	9822	10430	5894	14720	14961	11805	11079	10645	15864	9341	12497	13218	12771	11780	10041	10379	12712	11548	12510	10223	12590	11079	12164	15581	10923	12674	9451
108:33:22	108.556	15830	6734	10603	8898	12189	8248	11050	9822	14712	13404	10058	12653	8670	6337	9683	5860	7316	6392	10244	6679	7493	9999	12400	6092	16147	13569	11396	11434	11839	15754	11109	12927	15383	11556	11366	9683	9894	13252	11041	10037	9717	13218	12750	13164	18602	10611	11252	11067
109:03:23	109.056	14986	10797	10299	7286	12936	6911	12999	11636	13640	13628	7957	10138	8172	6818	11539	7624	8088	5641	8058	6189	7269	12231	10556	6472	15552	14121	11919	12328	10607	13518	9624	12560	15007	11501	13729	10442	9206	13311	10012	13062	10016	12472	10375	12366	15936	9544	11573	9864
109:33:24	109.557	12999	11134	9387	8181	12564	6603	8042	9484	14045	12611	9826	12624	7265	7223	13383	6890	7501	5540	9708	7320	8050	10885	11670	8695	14067	11919	10860	11362	11147	12472	9451	12953	14185	10510	11328	11602	9556	15619	10062	10489	11067	11898	11670	13003	14379	10282	12164	9552
110:03:25	110.057	16328	8240	12877	7599	10911	7898	10742	10759	13375	14936	9231	13742	8278	7421	11375	6582	7210	6358	8290	7898	9261	13294	11514	7999	14176	13560	13370	12020	10894	12775	10889	11881	14556	10767	12602	12446	8873	11940	9894	11573	11885	12864	12560	11944	16763	10573	13560	9126
110:33:25	110.557	16864	15434	12704	10189	13712	10261	10995	10510	14214	15033	13446	16117	7923	7438	9847	8383	8307	7185	8282	8607	9704	11624	10522	9809	13995	12008	12003	11780	11121	16493	9856	9657	12328	10662	15147	9619	8594	12636	12459	11113	14640	14256	11100	11147	17910	8805	11628	9484
111:03:26	111.057	16328	13041	14497	12455	14796	8582	12083	10729	16239	14725	14758	13767	9248	7312	13366	7822	8227	8147	9025	8472	8544	12910	9628	8881	13315	11278	13961	12522	16822	14687	10923	12851	15505	11084	14117	9278	7982	13007	9210	11678	9362	15223	10801	11349	15978	8793	11117	8826
111:33:27	111.557	15923	14653	14311	11602	14577	9181	12442	9915	12214	15130	13391	13969	8970	8333	9236	7970	8978	6253	10362	8265	7244	12948	13590	8337	13400	14100	13126	11261	14353	12624	10050	11117	14003	12607	10598	9430	8818	14185	9455	10619	9695	15792	11358	12299	15421	8695	10949	9219
112:03:28	112.058	15645	12797	13438	13362	17168	9531	13910	9539	15801	14214	13615	17277	9101	10451	11725	8472	8518	6459	9923	10738	9092	13227	13341	6780	13877	15003	12400	11425	10358	11522	10392	10801	14472	11986	12164	12261	9514	11991	9387	12902	12657	14277	10746	11839	14771	8307	11231	8362
112:33:29	112.558	13991	14007	12100	13413	13953	7835	13953	10919	16311	10565	10716	14902	9911	7029	11463	10003	9029	7160	10008	9594	11733	14252	13320	7658	14927	12012	12181	12480	13484	12033	11569	11927	14780	12400	11944	9881	9868	14147	10231	13906	11856	14412	11531	11759	15079	9603	11400	7345
113:03:30	113.058	15345	11594	12218	13733	14526	7649	15138	9792	13877	13024	14092	14396	9721	6780	14079	9522	9063	8451	10695	10463	8033	12725	14307	9670	15843	11324	14210	13041	11813	17944	13408	12864	14299	12109	14345	8877	9286	11535	9134	13476	11670	13687	10295	10100	19839	8759	15632	8126
113:33:31	113.559	14991	14510	12404	12037	15927	6869	13092	9839	13674	12227	10176	11868	10324	7911	11543	10008	8776	6746	9430	10151	9822	11493	11024	9573	15003	11181	12974	11109	10986	13623	11763	11463	17463	13708	10375	9721	10991	12501	13366	13240	10809	13375	9632	12100	19817	8303	13796	10991
114:03:32	114.059	14809	12438	9750	14438	12425	7480	12366	10873	12615	11383	10227	13974	9814	8223	11497	7687	9185	7012	10729	10202	9016	12666	14957	9695	12320	12256	11932	11181	11012	15957	11792	11185	12898	11219	11602	10860	9763	14024	9881	11463	10269	15560	12282	9957	18130	11434	12556	8556
114:33:33	114.559	16649	12003	9965	13645	14636	5459	14425	9771	9898	12999	11320	14282	9003	8147	8978	8261	9843	8079	12927	8831	9852	15113	11050	9252	14450	15387	13020	10316	11662	13463	9852	14484	15813	13206	10999	9345	9155	10860	8746	12067	9603	12045	12147	9995	16788	9544	11775	8189
115:03:34	115.059	12248	11172	11910	11354	13185	6033	13155	9784	10463	10906	11569	13328	9092	7788	7970	8603	10417	7265	11294	8831	10826	16632	10531	7995	12640	11121	11839	12176	12375	13995	11957	12467	11847	11164	10999	9354	8565	9738	9826	10953	9392	13096	9771	9759	17391	9409	12143	8042
115:33:35	115.56	13885	11653	11147	10054	12379	5911	12092	9307	12446	10257	9860	13248	7814	7932	11906	8565	9624	7417	9830	9198	9999	14003	9632	8193	13121	11100	11923	12953	11497	12303	9868	9978	13315	11197	10003	8544	7649	14197	8489	12548	8514	12649	9923	9548	19286	7624	10662	7202
116:03:36	116.06	13193	12197	10704	10729	14767	5725	12484	9041	11687	10252	8071	14856	9641	9489	14269	8700	9269	8915	9742	8092	8687	13847	8666	10041	11151	10273	11970	11016	10560	13733	8459	11809	11750	11552	9143	10792	8632	12514	8552	9902	8890	13231	9455	9058	16501	7978	11864	8286
116:33:37	116.56	14197	12151	9877	8679	11982	5637	11986	10881	10484	8198	9371	13936	9641	8763	12387	11257	8839	8151	11375	11062	12218	13784	9248	11801	11835	10404	10341	10763	9662	12130	11830	10932	13227	11467	10176	8999	8480	10020	12493	11805	11455	12168	11438	8067	17687	8113	11168	8307
117:03:38	117.061	11493	11569	9143	9206	13843	4945	12033	9814	10117	7615	9839	12337	9417	8598	12733	9700	10868	7797	12037	8168	8679	13683	12105	11400	11839	10670	11265	12636	11379	11856	9105	11219	15746	11640	11168	10210	8776	11666	9176	10510	9965	13623	11602	10493	18109	8430	10480	8375
117:33:39	117.561	12113	9868	9619	8784	13265	5620	10830	8607	11413	9286	9717	13007	10725	7957	11088	9544	8328	8729	10965	7776	9552	12071	12729	11687	11995	9493	9852	10176	9409	12910	9278	11590	16391	9544	10649	8219	7944	11598	8404	8489	9463	11332	9425	9404	14218	7742	9885	7628
118:03:40	118.061	11822	9970	8847	8425	12265	6506	9687	9915	8982	9974	11552	14176	10189	6097	10408	9155	7835	8852	10881	8409	7535	11185	10932	10581	11155	8932	11965	10961	9590	13311	9459	9468	13729	10472	9219	9252	7641	9974	7261	8974	8717	10451	12628	9645	13463	7476	10046	7050
118:33:41	118.561	10172	11046	7966	8704	10683	5451	10151	9016	8911	8717	10404	14045	9223	5611	7615	7253	7860	9138	8961	7607	9995	10839	10970	8109	12189	7561	10375	10096	9198	9522	8033	8936	11396	11113	11683	8151	7700	8531	8544	8404	9354	9295	9029	8750	15699	7404	9911	8691
119:03:42	119.062	10463	10885	7928	7772	13775	5447	10375	8877	9168	9214	12003	12514	9181	6527	9645	7944	8801	8265	10349	8219	10185	9029	11231	5886	11877	11514	8185	9877	9999	11889	8683	10995	11202	11818	10733	7826	7700	8071	7253	10029	9873	10497	9636	9113	15501	8223	8392	6632
119:33:43	119.562	11797	10733	8139	8459	10999	5198	9446	9282	10421	8700	10577	14054	8674	7586	8615	7497	8463	8691	7366	7544	9674	7261	10138	8523	10143	8548	9067	10480	11721	11640	9493	12299	11012	9577	9193	8582	7970	11408	6826	9877	8177	10349	7788	8898	15674	7291	8404	6316
120:03:44	120.062	12210	11172	8961	9008	11020	4919	9109	8641	8687	7320	11366	9809	7139	6759	10750	8181	7873	9569	8729	7847	11484	9691	11556	8636	11155	8797	11324	10949	10075	10548	10666	11185	11210	10501	8995	7869	7539	8864	8172	11181	7860	10092	9164	9721	15813	6945	11556	7696

## Sheet: Ave 4
0-72 hours: 12-12 Light-Dark (LD)
72-120 hours: Constant Darkness (DD)
Period analysis: DD, 72-120 hours.
Time (hrs)	TD2/+; ptimTIMLUC/+	PsiRNAiKK/+; ptimTIMLUC/+	TD2/PsiRNAiKK; ptimTIMLUC/+
0	71288.8	96193.3	54909.2
0.546389	75513.7	96873.4	66260.7
1.09333	75645.5	83158.3	65689.6
1.64	69536.2	70493.8	63179.7
2.18667	74343	74784.3	67730
2.73333	78803	83875	72250.7
3.28028	83858.5	93813.8	74704.7
3.82694	87884.1	101202	80319.3
4.37361	92104.5	106316	81273.8
4.92028	97341.1	111788	85452.9
5.46722	99629.7	120893	88589.5
6.01389	103479	124674	90037
6.56056	101450	125737	92509.3
7.10722	108307	136529	96911
7.65417	107542	141458	98599.8
8.20083	107902	147319	102105
8.7475	106980	152798	101531
9.29417	106672	150983	105692
9.84111	110783	164462	107516
10.3878	108904	157009	109231
10.9344	108785	167413	109011
11.4811	116268	166661	114939
12.0281	111912	170746	110956
12.5747	126706	182883	122474
13.1214	139125	194559	129397
13.6683	144961	197781	129849
14.215	158799	205888	138576
14.7617	149028	190730	130949
15.3083	158074	199791	136293
15.8553	147958	197063	132545
16.4019	155752	195621	133229
16.9486	149697	196261	130833
17.4953	146564	196306	129884
18.0422	148568	187765	134236
18.5889	140192	188178	130894
19.1356	128118	175057	125235
19.6822	122516	163810	115308
20.2292	119124	153153	117972
20.7758	110938	141954	108405
21.3225	110252	132713	105814
21.8692	102159	122846	100825
22.4161	97246.2	107678	93993.9
22.9628	94303	102320	87658.8
23.5094	87556.3	90971.9	82022.7
24.0561	62801.2	66742	75464.2
24.6031	51726.6	57825.4	52410.6
25.1497	47520.2	47202.2	46184.9
25.6964	41158.7	39213.4	39602.8
26.2431	35346.2	33648.8	34426.2
26.79	35176.8	32049.7	31163.3
27.3367	29293.4	29270.2	27998
27.8833	29442.8	28387.7	26555
28.43	29642	26080.4	25860.2
28.9769	27312.6	24195.9	24078.8
29.5236	30040.1	25238.3	24791.8
30.0703	27962.8	25122.8	24682.7
30.6169	29219.2	26359.8	25375.3
31.1639	31996.7	27463.8	26909.6
31.7106	32748.2	30028.5	29621.1
32.2572	37107.6	37166.1	32722.9
32.8039	39513.2	40246.2	35789.8
33.3508	44210.9	44227.1	41175.1
33.8975	42230.1	44365.8	42152.3
34.4442	40595.1	42258	45190.7
34.9908	43372.7	43546	48804.8
35.5378	50789.8	46479.8	52086
36.0844	63417.1	60227.2	62158.4
36.6311	80218.2	81767.1	78204.8
37.1778	91765.2	102654	90365.9
37.7247	106826	115313	104604
38.2714	111389	125108	107158
38.8181	123884	130369	111684
39.3647	124259	144494	118420
39.9117	123861	146543	121613
40.4583	131597	144352	124644
41.005	138547	155772	127321
41.5517	131254	150208	131297
42.0986	131867	158411	125958
42.6453	134222	165182	131909
43.1919	133281	150814	133017
43.7386	126467	147867	125529
44.2856	118008	143931	117813
44.8322	113944	141479	120995
45.3789	104762	123308	113128
45.9258	100897	94258.8	104945
46.4725	92567.6	74237.2	88577.2
47.0192	87681.5	66274.9	74590
47.5658	83451.7	67169	74931.2
48.1128	44292.7	58729	66433.9
48.6594	41230.8	53097.6	48700.9
49.2061	35279	43911.2	39813.5
49.7528	31013	36013	32670
50.2997	26391.6	30684.6	28064.5
50.8464	23625.8	27637.1	24836.2
51.3931	21661.4	24875.2	22524.8
51.9397	20000.6	21971.7	18675.6
52.4867	18142.2	19799.1	17666.1
53.0333	18164.2	18381.8	16484.7
53.58	18161.4	17539	15360
54.1267	17931.1	17564.1	15628.7
54.6736	18479.4	17845.5	15183.2
55.2203	19123.8	17985.9	16330.5
55.7669	20738.6	19891.7	17522.7
56.3136	22105.5	20686.5	19086.4
56.8606	25289.3	23854.9	20824.1
57.4072	25888.7	26880.2	23859.7
57.9539	28037	33202.8	26358.5
58.5006	27851.3	32549.8	29937.8
59.0475	28073.8	32199.8	32033.2
59.5942	30933.8	31355.8	35014.8
60.1408	39488.1	38177.9	37828.4
60.6875	49067.5	49350.8	48462.5
61.2344	63609.8	68794.2	56404.5
61.7811	70271.2	76890.5	64721
62.3278	80564	86761.3	73763.6
62.8744	84676.4	96071.8	74260
63.4214	87793.5	99008.8	83264.2
63.9681	97125.2	114067	83620.5
64.5147	91056.8	107755	87765.2
65.0614	96444	111536	85698.2
65.6083	100587	120216	86856.7
66.155	94011.8	116389	86668.4
66.7017	97524.8	121638	89141.1
67.2483	95592.1	119120	88338.3
67.7953	93186	114393	86233.9
68.3419	88836.7	115654	82745
68.8886	87450.4	109949	82843.7
69.4353	83350.7	97423.9	79750.4
69.9822	76345.9	70914	70979.3
70.5289	75432.6	57896.5	63555.6
71.0756	69651.7	56014.1	56301
71.6225	63084.8	52504.2	51822
72.1692	56850	57741.3	51569.7
72.7158	52425.1	60392.9	50124
73.2625	48008.7	54122.7	43936.5
73.8094	46118.4	48616.6	41129.4
74.3561	43278.3	46721.5	38022.8
74.9028	39904.3	42743.5	33312.7
75.4494	36764.6	38989.8	30521.3
75.9964	35895.5	38178.8	29596
76.5431	33337.7	32272.1	27754.7
77.0897	33137.2	31331.9	25468.8
77.6364	31771.2	29018.8	24473
78.1833	31549.6	27779.8	23757.4
78.73	28057.2	25570.8	22537.3
79.2767	28179.8	23742.3	21445.7
79.8233	28743.2	25334.8	20824.8
80.3703	26754.8	23542.9	20689.4
80.9169	29308.6	23827.9	21532.2
81.4636	29047.7	25844.5	22750.4
82.0103	27687.3	26682.4	22286.3
82.5572	28963.8	28276.2	24336.9
83.1039	28203.8	27331.8	26535.2
83.6506	28649.8	24333.8	27174.3
84.1972	29755.8	26304	30538.9
84.7442	31121.9	31355.8	30780.8
85.2908	32515.1	35169.2	32572.1
85.8375	36013.1	36381.2	34795
86.3842	39422.5	39917.9	37845.9
86.9311	40781	42766.3	37306.4
87.4778	43600.1	45794.7	38276.6
88.0244	45336.1	47117.3	40908.5
88.5711	45046	48163.6	41861.6
89.1181	48264.7	46154	40877.1
89.6647	47943.2	49124.4	42870.2
90.2114	44749.3	45974.8	40806.3
90.7581	47794.8	50395.1	43190
91.305	46380.2	52810.3	42706
91.8517	45975.9	56098.5	41701.4
92.3983	46991.4	59349.3	43981
92.945	48649.2	56847.2	41706.2
93.4919	46446.8	50632	39145.2
94.0386	46327.4	45439.2	39567.6
94.5853	47243.7	43669.4	36948.2
95.1319	45504.6	44970	36440
95.6789	41361.1	45382.4	35205.8
96.2256	38690.4	43953.6	33455.1
96.7722	38907	41457.4	33284.9
97.3189	37314.6	43116.2	30165.1
97.8658	35567.2	37704.8	27978.1
98.4125	34432.1	39157.6	27244.8
98.9592	33187.3	34445.6	26574.4
99.5061	32936.8	33232.7	25341
100.053	29826	30376.2	22690.4
100.599	27299.1	30388.7	23238.3
101.146	27847.2	28031.4	22578.6
101.693	26829.1	28189.2	22328.7
102.24	26562.1	26092.9	22016.6
102.786	27074.8	27296.2	22581
103.333	28516.9	27519.7	22373.4
103.88	27360.8	27900.2	22572.5
104.427	27346.2	28990	21727
104.973	26767.4	30147.9	22879.7
105.52	27073.8	30058.1	23379.6
106.067	27438.9	29160.4	24454.9
106.614	29445.4	27114.1	26588.6
107.16	28193.1	23279.9	26197.1
107.707	26876.2	26070.8	27378
108.254	24935	26063.2	26687.6
108.801	26343.4	25971.7	26548.4
109.347	29056.4	26696	26298
109.894	30027.3	28173.9	26326
110.441	28728.8	28733.8	26634.2
110.987	29484.9	28805	25053.7
111.534	27150.8	27930.1	24857.2
112.081	28766.4	29755.8	25762.1
112.628	28134.3	29847.3	25955.5
113.174	28233.7	29591	24479
113.721	25758.6	30576.7	22774.7
114.268	25289.5	31785.7	22839
114.815	26543.8	34721.2	23008.6
115.361	25169.2	34782.7	21914.8
115.908	23696.2	36744.4	21763.9
116.455	24252.8	31923.3	21319.1
117.002	24416.6	30356.9	21531
117.548	25110.3	31330.8	20579.2
118.095	24097.8	29365.4	19699.6
118.642	25242.2	32428.2	19649.5
119.189	23230.7	29962.9	18522.1
119.735	23718.2	28482.1	18947
120.282	23959.1	28414.7	18125.8

## Sheet: Wells 4
		TD2/+; ptimTIMLUC/+ Wells												PsiRNAiKK/+; ptimTIMLUC/+ Wells												TD2/PsiRNAiKK; ptimTIMLUC/+ Wells
Time (sec - from reader)	Time (hrs)	H01	H02	H03	H04	H05	H06	H07	H08	H09	H10	H11	H12	F01	F02	F03	F04	F05	F06	F07	F08	F09	F10	F11	F12	A01	A02	A03	A04	A05	A06	A07	A08	A09	A10	A11	A12	B01	B02	B03	B04	B05	B06	B07	B08	B09
0	0	49110	66302	62914	47457	76175	95958	83402	80719	79898	74083	88327	51121	56000	101890	70464	67319	105035	176936	84581	129016	100768	86338	65955	110018	51041	56948	61110	48451	45572	71100	62509	52890	52382	44439	49098	66325	45688	70984	61839	75863	50092	47734	53388	44855	40786
1967	0.546389	62810	62382	63481	77574	74245	86246	92073	83552	78962	78210	93588	53041	62960	126704	70036	83298	101705	153288	72649	121396	114724	97207	68938	89576	63469	75829	89194	69470	68984	85922	75667	67967	58775	47341	63747	61596	46774	83471	86997	94166	48324	60405	52960	43919	46497
3936	1.09333	61723	68695	58613	74984	74117	87321	89772	91738	80592	73875	87483	58833	57954	90466	64614	60532	100294	129687	63538	121778	81251	82280	64313	81193	57769	74083	95091	71366	70556	75794	72984	62694	73643	41699	54428	59885	58336	88743	82881	95137	44277	63735	47052	46104	43225
5904	1.64	57931	70695	56532	72025	52879	70186	76904	91472	80453	66487	86419	52451	48670	81089	58104	54729	82095	100144	60463	88570	70510	74383	58879	68290	58948	77726	87217	67250	78754	74707	72765	54486	73181	42763	53341	59399	46277	70892	75632	84026	43826	65122	49711	44693	46058
7872	2.18667	61018	75435	55838	72753	57249	88165	74441	99774	88570	67446	98479	52948	58694	82500	56960	63978	91530	101161	67724	88755	74094	74210	59873	77933	67805	76395	94571	75401	79575	79644	92177	56659	69782	51110	50671	62891	52393	77366	87205	94432	39965	65527	44936	51202	52624
9840	2.73333	62232	91784	59873	78152	55862	91888	85263	96837	96559	75320	98097	53769	59492	96224	70464	66995	108885	125269	73782	95600	70406	88674	68915	81794	75586	82985	97311	73759	81956	92027	82176	60671	69123	52717	56497	90281	50717	94212	85622	95576	46983	70811	51410	50913	55931
11809	3.28028	69631	81205	62937	84257	69701	93530	93264	104711	99774	83945	99751	63596	70371	110411	82823	73320	118124	128808	73828	95114	95808	107602	70441	99115	79043	79598	110920	80708	87136	98606	91333	61365	73227	51838	62845	82754	48775	78696	89553	105879	46774	66117	48532	64128	60972
13777	3.82694	72684	96756	76869	96860	67481	81228	105867	97785	100537	84280	111579	62683	69782	117175	81008	77308	113868	151275	91518	101115	114400	100941	89992	106041	74164	93900	108839	85645	84558	101878	99716	64660	80199	60764	69007	83991	58683	89090	95334	113868	54359	75320	62891	64174	65666
15745	4.37361	67735	101497	71504	93357	71447	98421	100780	121535	111024	95634	110932	61388	83841	123154	90362	81806	124911	156548	91807	108850	107521	104341	85552	117095	80869	90674	113417	83355	95264	96536	105532	68891	83945	64729	75875	87263	61689	83795	90316	99230	52451	82858	65989	57850	66221
17713	4.92028	74430	104919	69747	104306	80083	101092	103485	127235	114123	93160	124136	71377	84546	129305	90582	82985	134763	164423	97843	130380	101658	116493	95253	113221	82477	85922	114389	82615	97265	100780	120668	68695	91298	58590	68764	83170	62093	95981	98976	127247	62822	83529	68163	69308	71759
19682	5.46722	79043	103902	74649	108284	73817	90154	120286	126553	117048	103959	125131	72730	104364	139249	111695	97993	152247	162631	100629	123396	131988	97785	103312	125431	88801	100514	123558	93750	96999	104005	110296	66995	102109	58683	75366	86974	65053	96895	105254	124217	61342	88628	68082	69527	73331
21650	6.01389	83957	120945	73805	113337	77378	96016	122067	120609	122807	102202	126738	81887	109613	133491	105104	109232	140880	169245	108226	147471	119743	128045	100699	124344	96224	102653	118968	87009	97218	111984	123951	72325	89275	67400	76742	92478	63839	86119	107775	120378	64660	85818	81413	74372	70175
23618	6.56056	84859	96351	82430	107498	76742	92802	134393	119950	113429	101635	129293	78014	108769	120852	108180	108272	151090	177329	112446	130820	123373	123697	103647	140371	94351	107856	115996	99913	107428	101046	104086	76707	90293	75852	106324	99658	70464	92640	102190	133687	69261	84037	71423	72811	66672
25586	7.10722	88639	117811	80314	121118	77505	91749	136035	130137	120251	97877	141990	96259	115291	151634	122321	117603	162492	179457	120829	141608	137919	116100	105520	167569	104296	102421	139099	103000	109058	107093	112643	79517	89934	72510	87078	102606	71828	88073	124472	138833	72163	107948	66417	76753	79390
27555	7.65417	86234	124044	79239	111741	78210	106110	125813	128276	123489	107370	138544	81436	122321	167661	131733	124240	157855	184372	135653	157485	129178	138197	98930	149865	94964	106364	128045	101705	105740	119673	121535	74152	93542	70568	92975	97415	80187	105821	115210	150940	70105	95102	83772	77586	85194
29523	8.20083	79794	122726	77886	117788	78661	114053	130751	128993	118216	113845	125663	86442	119291	147691	125061	130103	172067	209339	136509	149275	159197	146962	129479	142857	98860	114077	136948	103717	107394	121350	122968	77043	102375	69354	91587	125131	96767	97716	113337	139955	77297	90801	75909	99959	81656
31491	8.7475	84616	122691	76464	110585	85194	96270	134243	127767	117499	109359	133306	85760	138983	149205	133098	128785	190698	188199	137168	163544	182290	148951	122957	149703	109162	112943	139781	112307	107023	101335	127975	82592	86338	82685	95241	110978	78892	104561	116089	136185	83852	97345	79470	85760	81633
33459	9.29417	81737	118713	80962	110238	83702	100803	139284	140325	105370	108977	129502	80453	151021	165996	133225	139042	168621	192582	140845	156121	159312	121928	134948	148153	108700	115476	136231	94987	123223	114574	123893	91102	93993	91241	90027	126729	98178	107972	113244	143932	82951	108191	78869	85968	90061
35428	9.84111	77123	130461	80523	119719	93553	134080	127073	137006	101774	111891	125269	90929	157138	183180	135376	151923	189125	209548	145043	166632	187170	138082	147367	162966	106145	115626	141608	113140	131363	112562	121535	85078	86766	91576	105381	109394	95773	105058	127536	145262	93206	97322	85090	87240	101184
37396	10.3878	80731	121361	94316	103428	92524	107162	124899	143840	92998	115510	136382	93692	133965	174889	143852	138475	208970	186545	145794	138082	186165	134566	124657	168147	116089	107590	137711	124992	121442	119754	122714	84673	90501	108503	89136	107231	98652	105983	118216	161775	80234	105798	98583	100201	94073
39364	10.9344	73713	116262	93530	101566	111614	116632	110076	133086	105566	111995	132797	98583	156652	171408	136578	146488	189818	204598	176960	161844	175490	154062	172669	162388	109347	111486	128519	119546	117534	111972	128831	93299	81864	87379	102329	119187	87853	109914	122367	170830	80812	105116	88604	113753	98687
41332	11.4811	97623	125304	109660	101127	122587	116840	132045	136994	108526	113533	127420	103555	153264	148697	153785	137966	190061	212196	167626	162573	174160	168852	156016	174739	113591	125316	133063	132901	124865	103000	154502	98872	87529	102317	107104	138533	91252	100988	125986	150211	80719	107671	105381	129721	100201
43301	12.0281	96895	131710	96270	100306	93900	107532	125246	132704	99797	126495	127420	104665	158075	176172	145887	143644	195728	235373	160989	177352	169130	157924	169234	159439	109613	109128	120679	139168	120667	123246	135410	102167	89934	93507	107081	119153	98791	96478	115499	126218	100398	118841	106919	113695	83494
45269	12.5747	96606	129825	103497	129051	120205	121777	123338	160445	139724	147055	144060	104884	178601	181966	156144	170483	206958	247922	178023	167985	198156	163371	161278	183712	120332	110249	132855	136324	130091	134601	151391	105405	102930	106260	125547	152767	123327	121777	141886	128056	102699	131294	106989	105139	102040
47237	13.1214	116181	141007	128519	112539	132334	135098	146453	168286	162261	153218	166782	106827	180659	195786	159277	163845	237687	244336	182394	170760	202031	200516	179422	217991	132901	130716	147864	143828	131779	136578	142464	111776	108238	112943	144118	130774	121292	137804	150385	159219	102421	123315	119442	110931	118551
49206	13.6683	135896	134798	135225	115614	125651	135607	163498	159971	163753	173189	163198	133133	179410	189333	159936	169766	227405	257545	188558	176600	229405	190177	178000	227242	143273	129490	142256	139619	151241	125026	115233	109047	95368	117025	143528	118378	123974	136301	152177	159266	100514	145725	134115	128091	117175
51174	14.215	144730	146673	149795	123281	144268	161128	191322	172136	177341	194827	157566	142522	162110	190478	197914	189275	239028	260459	217135	214255	242370	176496	191426	189714	144129	143828	163695	157786	136358	166112	143944	122922	126865	116794	147991	161949	120216	138960	145239	168239	96155	132161	119083	140834	116840
53142	14.7617	131814	150165	140036	112492	132068	151749	179526	164863	159520	159890	166794	139423	184163	166065	181295	177537	236206	229636	179145	183724	206564	175895	185343	183192	135896	125686	138926	143158	137746	146430	139504	114319	119789	118008	138440	129259	112654	145679	161243	162180	97947	121870	116297	119939	124957
55110	15.3083	138683	157474	153472	116066	146812	174183	164539	183666	181700	182278	167361	130658	204575	161266	176901	187448	235258	244001	188488	196514	222570	195786	200342	184348	146025	130785	153091	139353	135098	134057	154617	124529	119927	133213	135133	153149	114238	135711	163382	182036	112042	111660	126079	125639	132381
57079	15.8553	135676	143019	140706	136035	147112	151992	150315	170564	149309	181931	141585	127258	197220	179087	177202	186395	225658	232771	179121	199694	211583	187054	203719	185250	141851	129976	150743	144534	132600	148859	151564	124761	109891	105497	149067	140244	108977	132069	146361	166308	106017	120783	116377	134427	122529
59047	16.4019	120170	156363	160318	151796	169130	157173	167488	164180	153322	173050	159093	136937	180463	209247	190293	177410	206356	232273	209166	203569	193866	180486	178161	186164	123258	142244	137596	143505	130554	128530	169639	104456	127790	123963	134428	155011	110665	145713	158040	175825	108954	124460	114447	118725	120008
61015	16.9486	135572	152443	149760	121142	143817	162827	143574	156768	145308	185644	158838	140672	183446	186106	163637	184140	199938	258586	185054	193195	225925	206043	185886	183180	137388	133248	145147	121974	140394	141319	144013	114377	128565	113579	122101	133040	118332	125062	153854	165568	105289	129536	133133	124761	116805
62983	17.4953	104676	154791	150558	114701	140648	154340	150535	149668	154513	178231	170645	135468	173362	181469	184684	167569	207038	279579	201153	208831	220060	195057	158884	177988	132496	149286	140140	146650	126333	123153	161417	103277	106064	109648	138694	114678	106954	134139	167418	196190	104005	121592	111255	115464	118702
64952	18.0422	105798	152709	137353	106087	154363	144522	178925	200169	156953	159405	158965	127570	171165	184360	197173	160619	190339	242116	181318	202990	204575	165776	169176	183574	130912	132254	146823	137550	121199	136567	167280	120425	132763	110920	141227	140059	113996	139226	163047	179619	96675	146269	120297	133653	108203
66920	18.5889	124726	128519	131976	108816	140093	178659	143828	148303	147390	157046	154513	118436	180382	184904	171211	163475	178670	248176	176519	190755	203476	189679	173929	196966	127594	126310	134670	111406	119534	134011	167095	121269	114689	119673	130577	145760	109070	146176	145551	193750	90547	142510	111614	137191	119777
68888	19.1356	106272	132624	120760	88847	127802	129779	120182	143944	143493	164932	141377	117407	167916	181561	194571	142984	187482	224594	172310	154351	181480	184024	151611	157797	121292	131329	145796	129351	133086	126958	169153	105370	110296	104526	121384	150397	111741	119835	149229	173432	87518	111868	114308	102745	110330
70856	19.6822	97715	129906	116620	104908	117962	127154	133699	136913	128750	144256	134092	98213	167106	174727	160885	120841	159925	196699	154062	165684	178555	151703	167037	168494	106399	124553	120922	131490	109775	114643	151784	89136	112886	84500	109463	139724	94131	131201	138185	146904	83309	118251	108897	99959	105347
72825	20.2292	106376	130230	116886	81864	135954	114273	122922	125408	127015	142464	128912	97184	156213	164516	139203	124715	144684	218534	142985	135468	156571	157693	126888	170367	120980	118297	119060	124356	119210	132149	122564	100953	100675	91437	115869	119789	94987	121720	126634	201210	79135	128785	114100	127339	98155
74793	20.7758	90246	128842	115753	101150	110203	108804	93761	116273	103809	133641	128750	100028	137330	148292	127247	130577	139099	186245	136035	137769	142140	151784	134763	132161	103555	100444	118956	109914	101635	115869	126252	88951	100040	102722	124830	117083	93738	109532	135549	139908	75771	109960	109012	105925	86859
76761	21.3225	103982	114817	120505	77759	107890	112701	96536	118031	124148	120031	122332	104295	118933	140648	95496	102456	155369	176461	127478	139943	126368	127871	131005	150524	95334	109613	97739	100976	101022	107312	118713	98999	122009	82558	104688	115742	91680	107613	118944	148558	76175	119777	96316	110619	97704
78729	21.8692	92987	100248	89506	69967	97380	103520	107208	119476	113730	119442	117383	95056	114736	135133	82072	107879	150200	169812	90686	128912	128808	126426	121407	118077	87772	100433	92096	108538	100074	97681	121743	88605	106249	93877	94906	118540	89506	102803	107058	120459	82615	113903	109082	97692	83702
80698	22.4161	102352	101890	109879	81609	89425	89136	102780	97715	91437	103705	107601	89425	95727	130033	86755	105486	112203	146858	92478	111625	112701	95970	102630	99670	86049	97415	84142	100479	105069	92212	102306	70048	90651	85980	107313	103254	79667	111163	94212	116805	71574	99647	101450	90848	83587
82666	22.9628	80153	99947	92825	79471	94848	93519	98259	108214	118956	97785	93877	73782	79285	109937	90790	107659	107960	138220	87425	103832	108654	91194	97207	105682	68198	105243	85367	96953	79228	89980	111313	69527	74788	55006	84049	84407	78441	99276	99334	132820	72048	83679	97253	82303	91622
84634	23.5094	82731	99889	78592	71620	89819	90570	86130	97473	97114	100086	85055	71597	78118	90824	82326	75146	95137	117476	90316	90015	96305	91507	93380	91113	71273	92408	70152	86373	78742	82245	107255	66255	86304	61561	79575	76129	70545	88882	86223	121433	67215	88038	93900	75042	72926
86602	24.0561	57191	73828	62116	48740	64764	51884	64960	63735	64174	74638	67897	59688	64024	56925	65712	58405	69828	91298	55168	88581	63978	68718	57099	61168	61978	82188	75250	82685	79216	82500	97866	69793	70475	58937	71643	80638	66602	78592	76291	98236	60186	78430	74187	77540	61515
88571	24.6031	47341	60475	50832	45665	55480	49295	52590	53619	48682	59631	48647	48462	50948	54139	41942	50694	58232	87113	54671	61030	54405	54255	64903	61573	42254	60498	52463	55203	47977	55110	68845	41549	54474	37098	60792	56139	39167	55203	58000	68256	38450	49503	54659	54486	50497
90539	25.1497	44081	44728	52763	41167	51249	47480	46416	41965	48497	50913	52324	48659	38566	41826	39803	35479	47907	75551	41560	58613	46104	43861	53561	43595	37352	55064	45063	45965	45260	50266	60359	39838	38393	34300	54139	46682	36080	46555	46162	63330	39595	51965	45202	48948	39364
92507	25.6964	36416	47665	42901	36739	44670	34716	38890	44393	41757	44740	47179	33838	42242	38219	28543	30589	45526	61804	31248	48150	37826	33005	38878	34531	35815	42497	36601	46497	41445	36982	55792	32693	40162	25930	38358	46451	26797	44219	43873	41849	31907	44451	45826	39098	34416
94475	26.2431	32820	36543	37040	34948	35872	29606	33549	39976	35248	40959	36531	31063	35976	29260	26312	28288	36543	50127	24543	39479	37768	29734	32092	33664	30034	35456	37838	36797	34219	37040	47329	28358	32242	27803	34924	32705	27560	35745	33595	51515	27618	30936	32913	35560	32763
96444	26.79	26566	41688	29317	33086	36150	31595	34716	42335	37271	45676	32867	30855	36242	31017	23780	24404	38300	44913	22728	35167	34936	30832	34497	27780	25895	34751	37098	29930	30635	35028	37144	25838	33572	24624	37595	29572	24231	29687	34774	39260	28832	29271	31260	28450	26982
98412	27.3367	22000	29248	32566	23861	30208	25410	28127	34011	29999	36254	31664	28173	39075	28115	19930	23491	32867	42693	23398	30046	30323	26092	28427	26786	25572	31653	32913	28635	27803	33757	33664	24427	26994	22000	34474	24647	21745	27468	30208	32774	21861	28138	26508	27225	25491
100380	27.8833	25156	32901	26485	25179	29364	25028	26427	31445	35387	38416	32624	24901	34994	26473	20034	21456	32092	43745	21479	27630	26231	25502	36427	24589	24682	26150	27745	24832	25341	27791	32624	26728	23791	22763	28739	26069	19075	28381	33456	34174	22635	28485	26138	24936	23121
102348	28.43	21884	33849	27063	28670	30820	29109	24947	30173	29398	36578	30208	33005	28439	27132	19005	22566	29387	40404	22080	28231	25040	21433	25699	23549	23999	29549	29942	27722	25618	29329	32265	19711	22890	21595	28011	22924	20670	29352	31364	28971	21942	28369	24242	26184	18416
104317	28.9769	20127	31849	25352	26150	25225	22959	28150	30115	27861	33317	27514	29132	27352	25479	17826	19849	30069	31641	17676	25213	22404	21826	25595	25421	20982	28982	29861	23687	26462	24104	24104	21329	23595	21745	25005	23028	18901	26936	26127	26439	18370	26473	23595	25919	20011
106285	29.5236	22578	29699	26843	29838	26335	21768	28254	36913	33803	47399	30901	26150	24531	23502	20092	21109	30774	38150	22393	28647	22901	20589	23872	26300	22277	21965	30127	28092	26543	28011	32265	20913	23537	23838	23849	25202	19942	27156	25942	27549	21225	26751	21179	23040	21225
108253	30.0703	23849	26080	25433	26219	25028	28473	26335	29965	33040	31190	32034	27907	32855	23618	18404	22705	29121	33953	19063	30231	22543	22046	23710	23225	24034	26358	28716	26138	24057	29630	27549	19017	22658	25618	25075	25560	20520	25803	26578	24739	21722	25722	21445	25144	22254
110221	30.6169	25606	34000	25572	27040	28693	24531	26173	38231	30427	31699	30936	27722	30705	25676	21121	21479	28751	34855	20531	29364	29572	25190	23132	25942	24520	24104	33213	27121	24543	27653	26601	21687	27861	24289	25179	26427	19317	26046	28023	27144	23421	26462	22901	25063	21306
112190	31.1639	27283	32786	28011	31988	34878	24774	30762	37225	34508	33364	39942	28439	27803	22277	20381	25190	36312	37329	21861	28485	26751	29283	26288	27606	26080	22809	34867	28867	26635	29075	28924	24312	22427	26011	27121	23063	20971	26901	29734	27514	25676	30693	23653	38485	21283
114158	31.7106	32462	37780	29953	30173	33942	28346	32786	33745	28023	36913	38844	30011	36023	29017	23722	28011	33202	39375	26531	32208	30485	26959	28104	26705	27745	26994	37352	28820	27202	29710	30462	28774	24265	29502	30658	31421	25086	33179	32751	36901	26647	31132	29421	29988	24034
116126	32.2572	35202	41098	36716	31965	34462	26508	33930	44948	43653	41237	43838	31734	48948	32485	32624	35132	39028	48936	36820	38289	37190	33976	29525	33040	32184	31375	40011	31838	37687	30404	27364	33953	27618	36462	30531	34000	27271	34578	38913	36485	29040	34705	32589	30277	29895
118094	32.8039	40751	40543	34971	37225	36104	31098	37144	46312	43156	39919	44890	42046	46936	41271	35086	37595	42809	50035	36901	46324	39861	37803	35965	32369	34601	39757	38820	39479	33098	38786	28508	30219	30208	40115	28832	38335	33710	39179	38693	36867	31179	42716	32404	44659	31421
120063	33.3508	43653	44381	40289	43584	45399	31757	50486	53364	41526	44393	49630	42069	47260	38173	42566	45040	51965	61076	36092	46173	43849	39179	41110	38242	43029	38601	50960	43919	39109	38786	27988	40474	33907	43930	39745	43052	39468	42219	45688	49180	37213	53364	47052	33491	33502
122031	33.8975	44208	45965	41768	37445	42624	34589	45792	50752	32959	43769	49249	37641	48069	37410	41063	37687	44196	62845	38693	48948	49803	42797	39410	41468	49734	40358	52197	46925	51896	44902	34763	41768	34323	42046	39237	48301	39722	37884	38011	53746	34231	38705	41468	44162	30820
123999	34.4442	49376	40682	33583	38000	36150	35306	46890	51260	27456	38115	48312	42011	43954	39884	36774	36404	51214	61550	32797	46670	43699	46243	30647	37260	44428	37225	58764	42046	50231	41919	40948	48011	43630	43306	36138	58544	42867	39792	44139	58232	39445	44462	48370	44000	42508
125967	34.9908	54983	45133	34843	40069	46324	39977	41098	54474	37237	40543	48705	37086	51850	37213	43607	34901	56185	57654	28416	52312	36404	51445	32982	39583	49827	33456	61087	45537	57492	46636	47607	55099	44728	49919	40659	57931	44404	55122	51792	48416	52497	50277	42300	49676	40439
127936	35.5378	56555	49746	50913	46728	54497	44150	51202	67203	38265	54231	46832	49156	55619	39202	45098	44832	59238	66995	30959	47029	42624	51676	36069	38416	48659	40416	64105	38485	58486	41907	50104	66833	34693	62093	61226	61654	51734	54463	46300	49723	50277	57318	56706	46416	52208
129904	36.0844	73690	72071	66024	46335	55850	56255	65435	80904	44982	60613	72406	66440	74418	48659	62463	65319	66799	88396	43954	56625	56093	65099	47341	47561	47514	54185	85275	39098	53122	58648	68845	74141	49121	78996	67042	65065	61793	56983	67284	70337	56486	57226	66105	66267	61793
131872	36.6311	91749	93322	80985	62972	72799	74036	85598	83506	50717	83193	106515	77227	87321	71400	82627	101543	98814	130380	38508	80361	82026	87391	62972	57862	80303	62139	76464	68683	68475	80361	76222	74846	60451	85078	74649	82361	70498	90882	89310	83933	68244	96976	101392	79679	71354
133840	37.1778	103289	100907	111001	75482	101150	72637	103196	109058	67146	86223	90917	80176	92270	107359	93622	111463	127536	138822	59677	103011	118100	103289	81124	95576	89194	100051	96155	101554	86697	74661	83922	81193	68221	88755	80210	110515	85911	93888	105590	97415	74695	84199	97010	100248	97600
135809	37.7247	102144	130935	94073	90073	110157	67920	130600	123755	80846	117800	126414	107197	111024	122159	109093	101126	135873	160573	79286	103982	126645	118771	94374	120852	110862	111984	114874	105289	88790	110330	102121	92732	95287	108284	119650	102849	94975	112308	111961	134520	76071	116065	107463	91056	89206
137777	38.2714	109463	127513	106075	99103	97704	99022	134774	132161	102213	111903	122286	94455	117291	142256	125570	114030	167222	155276	101288	131294	118574	113117	92015	123361	106700	113036	113880	98386	96525	108538	103381	102352	92859	118656	93981	118124	92813	120251	116574	156467	89553	113487	96501	107579	90674
139745	38.8181	108943	139781	126599	122078	138821	103416	123466	128056	115175	125246	144499	110527	117719	130600	131063	119060	159046	178231	98490	133283	130750	116354	118945	130889	114944	110689	141839	127744	96721	110920	111556	104318	97137	132624	88258	116297	109752	114319	113267	131062	88304	115198	123662	110134	86616
141713	39.3647	107150	157092	115002	124287	117892	101335	121211	130288	131329	133213	150500	101809	138266	162989	139619	130380	174542	177248	128484	141770	139411	142938	110469	147818	123523	149599	125582	111348	102225	117407	114157	104826	98768	109290	133260	129930	109787	149552	127085	129513	103566	135676	103023	117453	91252
143682	39.9117	116643	139897	111452	109185	124668	114273	134740	149691	119303	135861	125096	105520	133583	152605	142950	135179	157635	197312	125466	145389	161660	134289	123223	149229	121257	139561	124599	125848	109186	120795	131768	105023	100144	123477	116274	124703	121488	155693	132901	138833	112192	111984	109729	126218	102190
145650	40.4583	124102	146927	125825	119118	118239	118748	130091	135271	132866	151194	148569	128218	117858	154791	132427	147170	177930	194964	118355	138706	134797	161626	105647	147956	123362	127258	145043	104815	105000	134982	154259	108064	89610	126148	182367	129640	105751	131594	131791	162250	105936	113892	123096	112377	100294
147618	41.005	116285	148951	145389	128808	124552	109914	135642	142938	146060	146881	190281	126865	132577	161336	145956	128912	189784	211895	138347	168794	151749	164562	135711	139642	124853	143944	146049	135017	123003	105671	121003	132462	121570	113452	94062	158144	114793	133872	142013	142915	101150	154768	129143	133364	102502
149586	41.5517	105428	147402	125154	125200	140903	122413	139527	125767	136196	153114	142764	111174	133005	160468	146141	142741	179526	192582	131363	148419	148546	138405	124437	156860	132589	138463	138174	151206	146199	140972	139932	112076	114262	115591	124460	119696	124240	158017	140822	170784	105971	126900	125131	130218	101543
151555	42.0986	105497	166829	132439	115268	136879	121026	144441	133248	134381	138729	142499	111163	137075	167788	151645	145505	198850	211606	145609	162446	156571	136671	140764	146407	135167	146604	145748	110377	113406	118043	140036	116748	98190	124703	136717	123315	109787	129536	144222	134971	115661	125975	114551	143829	117534
153523	42.6453	114400	138232	128125	119731	139550	135642	145621	130299	131201	153553	152640	121673	144245	171975	150316	148350	181931	221656	141944	178347	190443	146835	134624	171512	145875	159277	155230	134971	122887	105451	117418	125397	113348	135977	134370	144094	112620	148223	143192	141469	102491	147344	114354	145748	120344
155491	43.1919	108075	152721	120159	136394	126484	136509	141782	132716	131340	140486	147020	125686	131340	160885	147297	145713	138613	230238	148234	165337	139781	130253	138278	133803	133364	146430	143979	146939	117129	124599	135306	124599	124194	134659	115973	156896	116609	158827	151391	164597	98016	139677	119731	129640	110793
157459	43.7386	106885	144811	105717	124067	122564	123963	133456	118019	135954	145170	145239	111764	140995	128588	151645	136879	156560	154305	144765	137434	149344	151877	172044	149969	127628	151171	132404	133144	117083	114932	133976	97958	115395	125628	97727	155265	119095	122090	151402	132936	108214	147587	153322	116852	82292
159428	44.2856	111880	116377	109567	93588	107890	103104	135896	121084	129582	142510	133040	111579	129629	135676	136081	134127	192189	169754	136913	130716	136902	135422	136740	153021	127998	124726	120147	117765	102930	110457	137214	109324	93021	146326	137573	119245	89553	111290	139515	118274	87957	105509	143678	129860	101716
161396	44.8322	104433	118274	100363	104699	113163	122922	110041	101751	124391	130484	127409	109394	126021	145401	129027	134242	136023	199718	142163	137943	128819	136012	127859	154525	122645	116447	104792	115210	129131	129848	114990	110064	95889	137896	99427	129687	97831	142117	127455	151877	88697	125813	161128	130369	109590
163364	45.3789	101971	109186	98930	93692	118956	92177	106017	112284	109509	110030	118320	86072	101415	121292	97982	105809	125385	180717	93241	127547	156849	123431	108261	137769	112943	124923	113059	113961	121118	109845	116204	104214	96675	105682	90767	117650	106734	136150	115429	131710	83020	127686	120251	113834	113834
165333	45.9258	89206	109579	85853	91865	114146	95831	107047	106989	99855	110203	118239	81956	83540	84812	69863	82685	122876	133202	65747	89102	103774	100733	83332	111440	104815	110272	107636	102664	96421	115961	122714	99970	86477	107486	95449	117950	95415	101485	112654	125281	84084	111995	122251	96444	86419
167301	46.4725	87714	90350	102005	93831	89830	86327	72302	94120	99843	94790	117037	82662	66070	71551	62047	67492	93183	111521	35711	61099	76996	105324	48416	91437	87645	101624	97091	104306	95970	90246	89263	75274	70441	100421	84373	81737	59561	98849	96259	110735	75575	95103	73770	79598	92281
169269	47.0192	71736	97877	83956	72244	85240	84870	95842	89287	97554	94594	103820	75158	60590	48058	67296	64752	74406	95577	38000	85217	46774	76973	54312	83344	69759	86951	86373	70071	64810	67527	53688	64602	66753	95715	64105	78014	53584	114065	100363	98479	52162	65989	60879	77297	75204
171237	47.5658	77447	96132	72626	74626	90928	79089	86072	90177	82534	87691	84396	79702	66244	50543	48000	79933	78106	86720	39468	68209	60417	85760	58359	84269	76071	89275	72094	74857	66972	78025	80430	78731	61515	81459	57931	93264	76094	85830	93149	99635	46150	72522	53989	70545	65018
173206	48.1128	39364	49861	38335	43306	44370	45063	43699	47214	49329	46370	48555	36046	47618	56440	39144	54497	73493	84639	43503	62856	65319	60243	47769	69227	66868	70996	69470	68533	69446	58405	70325	66614	48925	76962	59827	85818	56694	67111	72418	78973	50671	71088	71215	55480	59272
175174	48.6594	38867	44751	34208	36878	42589	39930	38647	44439	46543	45930	48081	33907	41826	48717	46115	46509	52590	82592	43375	54729	54440	54740	51757	59781	43225	54659	44543	53364	47468	51156	57896	48104	37040	46555	37306	53422	42266	54856	46127	72813	32728	51156	53526	46983	47526
177142	49.2061	28393	42832	27768	31202	39676	31942	33618	38971	37641	38913	42716	29676	31572	40300	42774	40046	41202	56128	38485	44913	54451	48670	41653	46740	39410	48890	41294	43283	34150	38219	48913	35653	24693	46150	38612	46670	36531	42971	39711	52948	28612	44404	38023	36936	30011
179110	49.7528	24242	37225	28104	24878	35213	29687	26994	35630	35699	33121	34531	26832	29745	33884	31098	31664	36901	49156	34184	40069	36913	37653	30670	40219	37063	40809	34612	35965	23826	37664	41190	30069	22589	32416	28497	34046	29745	38370	32138	39144	22335	35352	31167	29502	29572
181079	50.2997	19803	32150	22000	23919	29190	27433	24369	27895	29040	29040	30011	21849	23549	25641	27098	26485	31098	41676	24427	34127	34994	33514	27710	37896	28127	38924	28624	30739	24427	27445	34427	21329	17976	33109	23410	29965	25630	29456	28277	34809	20439	34763	32705	24797	19976
183047	50.8464	17953	32474	18797	19606	22184	23815	21676	26150	25849	24647	29699	20659	25814	24196	23317	21757	34184	42000	22184	28254	29421	29421	21144	29953	27283	30393	24589	31005	19641	26508	32080	19641	18855	25849	24693	26786	19653	27456	24450	30658	17757	24867	27329	24635	17433
185015	51.3931	15248	26508	16948	18450	22832	21167	18023	26439	24485	24011	27352	18474	21190	25271	18716	21676	27387	34485	22242	24647	28936	23526	20439	29988	24242	29144	20728	22335	16555	23942	25861	18890	13953	24196	25583	24543	19317	23953	21433	36393	15664	25098	20890	21641	18659
186983	51.9397	15919	21121	14404	19479	20404	18705	19988	22763	20751	21549	28404	16520	20173	20578	17075	18936	23121	28277	21618	23687	24150	19121	20751	26173	18069	24947	17896	21791	14589	19872	24855	13526	12508	16127	18092	22439	14300	19202	19988	29791	14358	20578	19433	17745	12081
188952	52.4867	14115	19248	14196	18023	17872	16555	18751	21514	20809	18878	22578	15167	17248	19872	15872	15988	22069	26797	17052	25294	22543	16150	15514	23190	18127	23930	16497	18069	14138	18624	22323	13503	14878	19528	21306	18046	14705	18450	16994	23040	11919	17791	18531	18242	12347
190920	53.0333	14578	20843	13560	16011	16647	18011	16844	23572	21375	18901	23144	14485	16242	17768	15676	18265	19202	25294	17583	19502	18520	18381	14670	19479	16659	19826	17213	19722	14566	16647	21445	12589	11653	13861	18312	16936	14150	17607	16682	25757	11722	16948	16023	16092	11768
192888	53.58	15086	20786	12740	17976	18080	20277	19526	19063	19341	19583	20578	14901	14011	15745	12728	17271	18693	25086	16439	20797	17884	16867	16312	18635	16185	22034	16566	13930	11942	16057	19028	11006	11399	13294	14624	17445	12844	16716	14566	21502	9815	16416	14289	18462	14439
194856	54.1267	13179	19699	14901	17815	19618	17734	15803	20346	18716	22843	20034	14485	18381	17618	14578	14266	17815	25953	14346	18635	18855	14774	16485	19063	16011	18485	15410	15734	12150	18659	18612	11341	13422	17283	15052	17352	12844	16705	15237	20219	12115	16913	17364	16520	10774
196825	54.6736	13352	21815	13653	18994	17052	17965	16231	22820	18231	22092	24751	14797	16266	17514	13664	16416	19456	24439	15144	19271	21849	16948	15838	17341	15190	20947	16474	16994	11838	15549	21202	13583	12011	13618	13202	15884	13399	15433	13503	19052	10323	16497	16543	13953	13653
198793	55.2203	15630	20739	15318	18404	17687	17907	15387	22624	21664	19040	29156	15930	17271	17849	12878	15583	20485	24439	17028	19965	19757	18219	15456	16901	16797	20867	16624	17133	14959	17907	23306	12751	13792	14115	14173	21317	12890	15641	15549	21410	10254	16763	16832	18254	11607
200761	55.7669	18138	22104	14601	20936	20774	22832	18150	24335	22682	21514	23803	18994	16867	21572	15075	18231	21190	27872	17676	22080	24300	18763	15664	19410	18277	22832	19375	18127	14242	21687	19375	14231	15109	17213	16115	18982	14358	17791	17664	24693	10474	15537	18138	17237	16520
202729	56.3136	20739	24913	19537	18959	22624	25167	20474	25005	19907	23387	25872	18682	19745	25445	15965	19988	21861	27722	19179	19780	19641	21745	15780	21387	19156	23583	21098	18659	15456	20011	22497	16381	12497	16427	18543	22521	15861	18670	17190	29052	14335	20820	22127	20115	15815
204698	56.8606	22739	26728	18404	27121	25132	23710	22196	30936	31294	24682	30369	20161	21791	28485	18647	23352	24069	29687	23803	26115	23930	24138	19838	22404	19167	25884	23086	19826	19341	22381	25121	21595	18277	19641	19791	26786	20208	18716	19722	24635	14774	18751	20843	20254	18508
206666	57.4072	25156	25653	21583	28473	20843	27757	26416	33132	24011	26728	30566	20346	24797	30867	22786	26959	30242	35537	26786	24242	26601	24786	22254	26705	20416	25121	25502	27225	21676	26936	25907	22219	18462	20346	20312	27572	20843	24462	22543	30797	16659	23144	28786	28716	23410
208634	57.9539	25884	34219	23502	27930	29976	27410	30277	34277	24323	24473	31098	23075	24878	33456	27109	28566	34890	51422	29190	35664	31317	37988	32867	31086	26959	30774	28786	29595	23699	29144	21537	20982	18335	25884	22000	33202	25398	27248	27109	32924	20994	31190	27595	27283	22890
210602	58.5006	32786	30670	24023	25942	25757	31653	31745	31063	22289	28589	29653	20046	28497	34404	29965	28878	37179	42462	25156	36659	33132	30647	28127	35491	32635	32508	35468	30658	23514	30462	25306	27144	25826	25537	27341	38890	26034	32485	28196	35606	26138	31317	34196	34531	24901
212571	59.0475	33098	24265	27109	27364	19780	30439	34104	32763	23132	27514	28115	29202	29225	36485	27803	25121	36797	34601	24612	36265	34901	38855	26843	34890	32023	28716	39052	30682	25410	32485	28705	34751	22393	28057	32924	38312	27468	32034	30161	38127	26011	38647	43341	35664	27734
214539	59.5942	36404	33317	29063	23514	22173	34242	34936	37005	23132	33375	33803	30242	32346	29710	27826	26450	29086	42809	16659	30982	40485	37213	32092	30612	32763	32832	41271	31815	25121	36231	34832	34982	24982	31063	35653	47907	30693	43006	33549	38185	26404	41479	43641	36948	31953
216507	60.1408	44982	43653	33271	26913	37225	42948	43295	52971	42069	36739	34069	35722	40254	36208	34705	38635	39699	48116	21526	37768	41896	46300	33375	39653	35468	41445	45618	30393	23005	39364	38127	34774	31248	38173	45075	43248	38057	40612	41306	37641	30046	40844	40982	43965	35005
218475	60.6875	53283	47156	47965	36659	43133	55064	60995	62937	41711	50925	43190	45792	55862	48670	50613	56185	57596	59862	28277	50035	47584	51306	42716	43503	47168	47410	55561	43086	36612	49144	53711	42162	30404	46590	48775	62255	44462	54983	51341	60810	38208	51827	58209	58521	36474
220444	61.2344	64960	68753	54301	49931	71134	61908	67354	78569	50289	73528	65689	56902	75412	83910	76973	73158	85078	73065	44543	73747	51202	63145	57411	67886	56682	72406	71192	57642	37052	64406	44555	50058	41953	62012	60613	60648	51884	69724	64926	67851	39664	60197	50139	56393	44497
222412	61.7811	71793	82789	55711	63874	77031	54925	80719	98883	54312	76719	58625	67874	67192	88119	72464	80303	95565	101277	58024	71250	66752	70441	68637	82662	81979	64787	83575	63249	54266	65134	70811	56521	37317	68995	61469	66325	67354	84049	66891	79540	41815	58162	63723	58509	64671
224380	62.3278	73470	84650	64937	86708	87911	86431	80129	83725	78176	79609	88581	72441	78291	95738	94998	100329	89622	110920	71100	82592	75620	82349	73192	86385	71481	86512	84188	64325	49121	72857	83286	75632	60937	59793	88639	82407	65203	88154	80881	115291	48728	66313	66602	80916	57769
226348	62.8744	73655	84812	75817	69250	87957	81101	100965	102953	86130	75181	101092	77204	82002	108607	87703	86338	102641	120887	87945	95033	106908	99461	79979	95357	74904	84280	84407	70290	55399	81748	88454	67331	43699	68522	81482	85598	74314	78210	75909	98583	54532	75354	72406	76511	67527
228317	63.4214	63874	104607	78661	80835	84535	110296	81251	100791	99785	87934	85841	75112	92223	100849	96074	95461	109706	125755	88616	108376	92848	102572	85945	89680	81066	90605	99681	91333	68706	94548	112735	70314	51468	80765	84246	79991	73377	101080	80673	110007	47491	81112	100028	80153	69169
230285	63.9681	74048	113279	85899	81031	89183	91356	100248	106515	103913	116898	116308	86824	100329	108006	104433	109856	119754	133375	111359	115649	112550	125177	111567	116747	83644	90015	100040	80708	64683	83367	103659	76245	54243	90998	83852	95785	68521	91958	82881	124009	55746	80442	88177	91634	65423
232253	64.5147	70117	97681	74302	77875	97010	97588	89275	103427	110770	91009	106700	76927	92223	125582	108191	100999	106804	145783	98236	101970	102525	100537	99635	110573	89784	90027	94767	87217	88951	96247	103474	67192	54382	100722	84801	86003	84789	104272	102017	108827	48451	92767	73377	107890	77112
234221	65.0614	79713	96178	76673	92432	95565	101115	106434	99022	107798	112331	100040	90027	104445	114412	105682	103057	117811	139481	109960	109151	120297	113845	97588	102699	83193	91819	113949	82292	58266	102954	86280	77227	67712	88408	81875	72903	76592	106630	88720	114296	54116	90397	100490	80442	81101
236190	65.6083	75435	115638	86708	93877	89032	108677	108099	109486	109475	113221	110758	86639	98606	114134	111521	106017	117060	167592	113441	144788	120956	119546	105844	123084	99057	99797	110966	79598	62914	96571	82199	79794	65319	85610	91183	107451	82615	87182	95287	112423	50093	85830	98698	72499	78904
238158	66.155	71585	101069	85078	96952	85910	97473	99392	91969	97450	104688	103069	93507	95415	115302	119430	113313	112897	148731	115002	118725	117476	103670	118505	118204	92617	98143	94177	72591	75204	121974	93287	68926	48485	85217	94790	94120	83910	93091	99785	115730	54382	78164	92883	97669	64891
240126	66.7017	84488	116863	87055	91611	81633	107127	102144	97276	102421	110654	101404	87622	98617	107983	117060	107393	132878	138532	142649	121141	140417	132774	103913	116297	93333	87969	94409	90963	61550	103497	98698	74372	78835	81517	83147	101288	77170	97820	89576	136486	54393	86223	100710	91622	88385
242094	67.2483	67816	106653	85356	98085	90813	112689	88917	96814	105439	99207	108457	86859	93657	116609	107902	118181	136197	147910	117545	126784	123130	123269	105670	112585	97114	101092	100803	82754	62671	98444	99693	73400	61596	100120	97392	94177	75713	107787	100028	100988	50636	87818	100676	94929	67273
244063	67.7953	92004	99415	74823	86292	99022	101531	92848	92385	89992	107208	98756	83956	95692	108746	114007	112007	125986	151125	111903	95588	118910	113556	112620	112573	89102	95264	94790	86616	65828	93322	96640	68441	59561	89819	75065	100849	75447	89587	93518	114158	54451	86153	89957	95357	96987
246031	68.3419	68094	100849	74961	85413	90928	87032	96328	86835	101681	114134	89321	70464	95253	103612	117129	127096	121535	126194	107012	109174	140949	106723	111718	121454	93125	84754	90165	86234	70279	91634	100861	69585	51341	76915	105428	84026	76673	96640	94085	101878	52474	81355	90085	80719	59388
247999	68.8886	65388	122275	73574	96814	80881	80881	88431	101288	86905	86766	95241	70961	90952	104283	101219	112573	108816	144326	105555	97762	118066	118505	96652	120679	81216	86408	93842	80627	70129	95253	95403	73088	42994	75181	77482	94201	74476	102780	86916	119927	50405	84986	103069	78650	72684
249967	69.4353	62001	96490	80442	81078	90431	86107	74684	84303	84442	94097	88142	77991	67319	108422	82615	88500	94929	130866	79910	92142	91703	104029	88165	140487	80453	94548	85575	83251	65816	89853	72765	84847	51156	90882	79355	99554	74429	85957	75019	104988	42439	85032	93472	72730	62637
251936	69.9822	65816	74187	67273	72637	84650	77875	78904	88616	82488	76372	82511	64822	58104	74927	62290	59157	84442	95021	45491	63203	81228	81170	62348	83587	78603	80523	79020	66660	49803	79945	81598	59920	45456	78488	84546	79609	68498	77239	81297	91056	42196	74904	66093	70036	55075
253904	70.5289	70001	90189	66556	72788	84581	75019	71747	83332	74927	79621	72626	63804	43873	68244	46532	40057	59712	82927	37849	54081	68128	72267	53226	67862	68995	67331	65724	60960	56821	65955	76464	60532	41896	81991	61087	64510	48694	80927	67724	76175	40589	64348	64024	60521	59399
255872	71.0756	57596	85887	52728	57411	68290	53942	73597	66371	83887	77713	92073	66325	34924	63377	47191	46613	71793	72695	32786	59642	54208	79956	35653	73331	61966	52127	65319	54890	46913	54324	66579	47017	36173	63908	62012	69967	42670	59746	51353	87737	30635	73563	59839	46150	49434
257841	71.6225	51977	67909	60972	68221	61053	61342	64059	73886	61076	61954	74487	50081	38196	52289	38358	40867	65828	68140	32670	53122	59746	78939	42797	59099	51607	50104	65943	58810	41179	54833	52567	40786	31248	66429	56301	66267	52197	53364	46127	78002	29630	48011	47665	53769	43422
259809	72.1692	48925	62498	58509	54127	56717	52913	50185	60879	57758	71504	59029	49156	48231	61677	38913	52809	81609	65908	40081	61168	60024	67492	56787	58197	45491	52694	56393	50647	38393	58139	55307	50717	48867	62706	47272	62255	48775	56706	52162	69446	32011	50173	46613	52486	45711
261777	72.7158	40624	53700	45688	53665	54463	52636	57665	56983	56694	57422	56613	42948	46000	58243	48694	58093	59607	94328	47734	54648	67701	61087	62163	66417	47572	50116	50925	45144	41965	53677	56243	45907	42612	62348	51087	59735	48370	50301	43456	71701	29248	56995	43410	54474	47318
263745	73.2625	34497	50775	42277	51861	55769	44786	49850	52867	53330	51780	46983	41329	45988	53145	43422	60821	53838	72707	42347	57920	51156	54266	51977	61885	48081	46347	49364	43029	32878	44520	38867	48763	24335	52613	42520	57665	48104	47283	41514	59492	27884	49040	39583	43803	36982
265714	73.8094	32624	59203	34797	50058	54717	42520	44485	49850	49295	49491	44555	41826	37121	45191	42266	58047	57896	51965	47376	50451	52567	47063	45988	47468	39063	43422	44717	31849	29838	40728	52416	34971	31329	47248	39792	52359	46127	48994	41098	53075	23583	44532	32092	53364	33121
267682	74.3561	30705	52833	34705	45098	43341	42786	40000	50994	48139	48335	46670	35734	33456	48936	38982	45977	49630	60532	48335	52775	49214	44150	39503	49168	36265	46497	39780	37583	28566	42855	35919	33225	20971	37121	42948	48035	40312	41780	35722	50058	22462	51214	32115	44277	30774
269650	74.9028	27213	42948	36231	41364	39445	41167	41029	42023	45815	44462	43595	33560	38393	44323	38890	44508	45260	47665	40046	40601	58058	34069	36450	44659	35410	43110	38104	25017	23930	30173	37711	28439	21456	38936	31988	40127	31618	43399	29340	41063	21190	43873	26578	38659	29445
271618	75.4494	24751	47318	33260	38185	37422	34531	31005	41248	42763	37953	38924	33815	28577	39537	39017	40844	43121	49306	37560	36913	38323	40531	34878	39271	31028	34855	36485	24046	23421	33710	38023	25976	16173	29502	32774	35549	29294	37167	30196	43711	19456	32277	26890	33190	27225
273587	75.9964	23410	45237	27988	25606	40982	34150	41156	40508	38855	42242	38867	31745	28173	36231	33803	38786	35641	48277	37144	40485	49618	29907	35144	44936	30971	38416	33884	31653	20219	29156	29479	26219	18659	23456	37699	32508	31595	36161	27398	35872	23260	32578	28161	30046	24127
275555	76.5431	24011	32057	26670	37791	42578	31791	31329	35468	36647	36578	34867	30265	25583	29583	27364	35884	31664	38543	29306	33167	34335	32554	32011	37271	31075	31433	32138	28069	17803	23075	25606	19595	15306	22682	32982	32913	27595	35711	24312	32508	19075	38104	29306	32994	30566
277523	77.0897	23179	40057	23560	31780	33017	29375	29005	41699	41190	37005	38543	29236	24277	31375	29109	32578	30809	40138	24716	31225	37942	25618	29225	38971	26277	27976	29780	21572	17491	25421	26635	18023	19479	22450	33225	32115	24184	27098	24971	34393	17271	26658	18797	32312	28716
279491	77.6364	20462	33156	27618	28473	38959	34416	28612	33687	36404	38959	34092	26416	23398	33930	23491	30982	30878	35063	25757	34231	33606	25907	25098	25884	27387	25572	28277	19757	18427	25734	32497	18890	15017	25606	33005	24508	23537	29791	21872	30231	17213	25306	19965	27179	24161
281460	78.1833	22265	42000	25260	39468	35560	28427	25051	31838	33098	34959	33502	27167	22751	24046	21375	29352	28485	37445	23317	31595	32612	24739	25352	32289	23109	28716	32763	18381	14104	25364	26312	21630	20092	21398	21965	27710	23710	26809	22982	31387	13919	25052	26682	24092	22728
283428	78.73	20462	28878	23329	24369	28878	28323	26982	30358	32971	33144	34046	24947	22404	25572	22924	27121	25468	37144	23826	26427	26462	23040	22254	24208	26161	26601	27687	19109	16948	25456	19526	17387	14115	24057	25826	28658	21861	24323	20034	27942	14057	23595	25052	22913	21976
285396	79.2767	19872	34497	25803	23803	29734	26508	26416	28046	36289	31630	31433	24127	19965	24393	19213	25283	23398	31387	20358	25942	27895	21387	19364	26323	21005	27838	25953	16092	17514	24566	22751	18485	13757	19433	25919	24774	20843	24589	19144	30473	13780	20913	19283	24138	19109
287364	79.8233	18971	38809	22335	26624	33283	30982	29664	30809	32947	30335	30103	20057	21595	24797	19907	24011	26658	39953	21202	25722	24693	27549	18948	28982	19664	20185	22936	16266	18034	23179	22057	16150	17919	22300	22947	26242	18728	27583	20508	26947	13607	19502	17283	25838	19445
289333	80.3703	22520	38023	20554	21445	25306	28092	25525	25745	29491	30959	31398	22000	21410	24335	20508	23826	23445	30762	20497	23676	27861	22184	19526	24485	20670	22369	28127	17156	13341	22381	23560	19225	13630	21213	22497	24855	20578	26543	17248	24520	14127	23317	16786	22947	19387
291301	80.9169	22843	37213	24832	28485	31387	28427	27121	31329	38427	32473	28947	20219	20404	23190	20716	28554	26208	29202	21375	23121	24901	21294	20589	26381	19780	22196	24890	20208	16081	23618	18786	17919	14462	17884	21849	29583	22820	22335	18728	29098	16809	25167	22716	20647	26601
293269	81.4636	23699	36728	25479	27664	27144	29780	27872	30473	38474	35341	28913	17005	23884	33179	19653	29410	26820	34265	24046	23572	24705	22104	18566	29930	20474	22531	22277	19838	20809	22670	20739	20138	18497	23630	20057	32381	23167	22670	24485	29340	18346	23317	25549	29468	17375
295237	82.0103	25976	33803	27040	24716	27075	24289	27710	32797	28647	32381	29260	18554	23687	30739	21895	32809	28219	34982	23364	24670	25710	22878	23502	27734	20601	19167	22161	22543	19190	23861	22947	20439	17248	21711	21341	28080	19375	21988	22658	30531	17641	21630	24693	26346	23861
297206	82.5572	26624	31953	27757	21965	27306	29791	30462	34161	31248	32242	29017	25040	27410	28658	24601	32774	28011	34948	20000	30034	33260	25445	26023	28150	21884	25768	27537	19433	18774	24705	29421	22080	20924	29849	26184	34104	21664	22936	19410	28416	15953	26843	28797	23283	23109
299174	83.1039	29225	37063	24462	21121	21387	30635	31387	34947	37711	27895	17745	24867	26080	29098	22508	27710	30543	29606	18289	30554	29953	26497	25283	31861	25976	26393	27722	21526	22104	24751	23861	24959	23907	27907	27526	34739	24473	24104	23421	31156	21514	27306	32254	34531	27109
301142	83.6506	31410	31341	28208	27999	22693	29676	31017	29502	34994	28393	24138	24427	26196	26959	23132	22000	29895	26589	17422	26485	26843	22601	20531	23352	25017	21179	26751	22312	23930	28982	24624	28473	21329	34601	25976	38300	24104	22173	24115	33965	22878	29421	31606	34624	26300
303110	84.1972	35618	34208	27341	25491	19306	32069	32994	34520	30658	27745	28161	28959	24971	29306	21745	23329	26473	31884	15364	32277	33283	28404	26150	22462	27953	25583	32982	27606	23479	37387	27167	28947	25734	33999	31028	41052	29005	32658	27734	33225	26104	28554	37976	34450	28693
305079	84.7442	34011	25132	28867	31468	24924	36624	29260	37156	28069	43086	29144	25722	32450	34265	24867	34658	38242	41699	20716	32416	33838	29213	25664	28242	31815	27583	33502	29549	25572	28404	26566	29965	22589	31653	33271	38439	27976	31560	29086	41422	27572	33063	40971	27734	28104
307047	85.2908	39156	32300	28716	32786	26971	36682	31965	36948	37352	36936	26381	23988	37630	44300	33872	38971	36335	39133	20346	32774	42474	31387	32612	32196	31791	34127	31271	25179	28901	36763	34543	30462	25167	34358	38659	36659	34971	30832	35294	37537	26011	30161	39179	34265	27884
309015	85.8375	40497	35213	36127	38023	37387	41757	39167	37919	31190	39768	30994	24115	38994	36994	35052	46196	41387	38011	27132	37075	36797	31468	31630	35838	32578	43907	33086	25040	24138	36832	31283	30936	28624	37422	39294	43318	31236	38797	35572	47595	33306	35294	37040	41456	23942
310983	86.3842	44624	46162	36612	41884	38809	40462	38439	42057	40312	35606	42277	25826	40971	43341	36393	46601	42497	43098	34890	38185	42959	34624	34335	41121	36959	45930	35502	30404	27664	42081	40797	31375	28277	46034	39190	36589	36566	46948	35872	42057	40115	36832	40901	43329	31341
312952	86.9311	42011	59157	35028	37237	33999	39977	44000	40682	40439	43745	46485	26612	40219	46589	44474	49884	46751	45572	39005	37583	43468	34034	40242	45375	34809	44150	36450	28728	26982	42011	39156	28554	27086	36427	41930	47087	35803	37167	39503	53445	33063	42034	41283	35768	31999
314920	87.4778	42289	51838	41214	46162	32416	53526	41838	44185	43029	50971	42242	33491	45595	51919	46913	45884	55226	46578	38994	45006	43826	43954	38589	47052	33988	45029	42844	28820	26774	43942	44520	38254	29075	35433	37699	39341	42474	40347	34404	55584	35202	38531	38208	37028	36312
316888	88.0244	46555	51156	46994	44682	48786	49584	44774	42740	45422	42890	42705	37745	42716	52890	49191	57445	49688	52994	39410	47977	42485	39237	42543	48832	39884	45468	49156	31803	32023	38427	45167	30265	27213	41479	40716	49861	36855	46069	39063	50786	34959	47283	53191	46104	33306
318856	88.5711	36369	48832	43803	45260	37329	46404	50231	52486	46751	46902	47792	38393	40878	53179	49977	47803	50994	53376	51075	44011	55677	43341	39167	48485	35676	50752	47445	31398	28173	40531	52174	30589	29537	45919	42855	46670	36705	47098	40150	57792	37086	46139	46462	48821	37121
320825	89.1181	40774	60613	38462	43757	45861	53572	51780	47919	46786	58000	51884	39768	42716	48335	51896	52000	49977	51873	36647	45260	45792	39213	43110	47029	38185	44277	48162	30624	28231	41919	45537	40959	29583	38566	41537	47954	39872	50601	41768	43433	31768	39965	44855	52347	38277
322793	89.6647	38786	53260	50000	45376	45110	50486	50162	43896	53769	51676	54116	38682	41526	48069	54694	60313	49052	56902	35942	47769	47445	43526	46509	57746	43098	49642	48844	35595	33861	50428	47734	36913	34601	43133	41398	42162	40520	50821	40913	48139	42821	44890	47480	39953	37329
324761	90.2114	33086	50960	46462	43688	40115	49965	40069	42312	47653	50751	55249	36682	39988	39896	46185	54624	50277	49873	32034	42127	46381	52902	47318	50092	38138	47445	42451	35294	30971	42289	39086	38208	31884	42254	36948	52266	38069	55862	39491	45572	39896	42497	36878	42555	38878
326729	90.7581	38705	60232	47087	41098	42427	51133	44705	46983	61700	49873	51225	38370	55538	49642	58128	50208	46774	53619	43537	44370	43873	47884	59538	51630	39607	50301	46786	33086	37653	44994	45549	38566	33942	38104	39468	50451	37861	53295	38739	59203	38751	48000	44092	52174	36369
328698	91.305	40786	54335	39537	45977	46219	46959	44196	45040	48786	54162	52104	38462	49676	53989	50393	52070	53087	68845	46277	51098	51202	59631	48011	49445	35630	53792	40555	37780	41526	50532	41849	36046	30300	35699	44878	52474	41479	47063	36208	47988	40612	49653	46162	53792	32809
330666	91.8517	38728	50590	45445	41688	42936	48879	46370	47607	43988	52798	50520	42162	41942	53145	64486	57388	64278	64197	51121	52335	54150	57596	54324	58220	39664	46659	41260	36809	31699	54382	40844	34150	25630	46809	39849	50081	37780	49144	43110	48728	38901	45826	38589	50347	35468
332634	92.3983	32231	56393	37572	41237	46509	48428	49480	54174	57469	55954	43803	40647	53723	60509	58081	67250	60278	72360	56995	59411	58983	45942	58694	59966	35907	47341	39017	33086	36242	48809	58185	47098	30693	48231	35179	45988	39942	45572	40497	63573	38739	62856	51734	45121	29791
334602	92.945	45803	58359	35780	45803	46786	49514	50000	46196	48925	64463	53237	38924	48139	62405	42797	57723	56058	65689	62903	47133	54197	63827	64914	56382	38543	45907	36485	32277	29421	49422	41942	43352	34890	50728	42612	45699	41930	43780	42231	53353	32057	52775	42925	39861	35641
336571	93.4919	42485	53630	52139	42347	45826	44196	51098	44069	45017	54451	42751	39352	49699	52150	32069	52046	46890	68764	40057	45225	60498	50844	56810	52532	37780	52844	37942	32797	25745	40716	46774	36393	24635	41664	41815	45803	36948	39919	38936	56278	33132	42277	37468	42023	30161
338539	94.0386	43283	57596	43849	42034	51931	46347	46485	44104	47688	51330	42982	38300	47144	50775	30312	41838	47931	63943	32728	34543	45271	54532	44659	51595	37965	51434	44312	31930	33757	51364	45306	30855	23271	38046	38138	40913	32867	42520	37930	55399	28774	51515	36323	42763	35537
340507	94.5853	45364	65469	44728	40659	45537	47399	51827	40531	44508	55145	44254	41503	40890	48428	35895	39398	49422	68510	25560	34682	40705	53989	43861	42693	34624	44693	41156	30393	32647	35618	43271	37491	25375	41653	40693	39017	32323	50590	33283	43630	29144	38635	39688	38682	23306
342475	95.1319	40115	50682	47006	44647	45156	43676	46613	44959	52624	59885	41664	29028	41237	49931	37468	44231	52104	60220	34057	35757	46878	44381	43873	49503	29213	39803	40161	28739	31676	32728	47376	31630	22069	46324	34127	48994	32462	53549	34184	41884	27017	39687	33606	43584	26427
344444	95.6789	37687	55758	31572	41098	46254	40809	42901	37572	39792	47734	50451	24705	39133	51572	38751	48902	46878	58162	44266	42046	39341	44636	45896	45006	26901	45387	41595	31340	31017	38289	39803	37445	20601	36312	39514	37815	32971	37549	36242	38370	23040	43491	38265	37676	25699
346412	96.2256	31387	45560	31040	35248	38994	38335	35248	38300	38474	53260	45179	33260	36115	50012	37965	45653	44844	50832	36751	43780	46659	44717	47179	42936	27930	38462	32554	24543	25734	34150	37907	32647	17549	47954	36127	40404	29942	40693	32161	38439	28138	39029	42173	36843	19179
348380	96.7722	35606	52266	34057	33236	36693	38844	41294	41838	39664	46451	37352	29583	36635	43792	41433	41017	41318	54463	37017	38809	40069	39653	45850	37433	26369	36439	28705	31028	28393	35641	38046	37618	26774	32843	31884	37849	30531	37063	35676	43514	25861	39028	37028	34057	24635
350348	97.3189	29421	43318	28936	36635	41352	36219	40601	35352	38844	45549	39213	32335	34369	41815	44647	40011	51584	53815	40913	49064	41572	38346	40982	40277	26196	33999	30127	24439	22855	28658	38161	31745	16057	39849	26947	30797	25768	35896	31872	32820	21745	37607	41873	35306	20751
352317	97.8658	28797	45318	30705	33780	35306	32589	33098	40185	40185	39341	37826	29676	30057	36994	37468	37791	42728	42150	34000	37896	42786	30716	41121	38751	23317	32786	30208	21271	22161	29537	38959	28069	23109	29156	32497	33560	23919	30300	28982	36335	16994	32797	29618	27838	16127
354285	98.4125	29040	41098	30104	30797	35953	37734	35907	37976	31803	37364	37872	27537	31525	41306	35676	46624	40370	42936	30023	38612	44959	35202	38809	43849	23260	31768	30358	26242	19271	24913	30208	30127	23942	24774	23525	31410	20971	29387	29745	37109	18566	33375	29895	30150	23144
356253	98.9592	20855	40011	29976	29618	43988	30658	41063	32254	31271	34231	36878	27445	28774	36508	34150	31734	34312	45688	34947	29849	38878	31803	31225	35479	21410	33734	32138	25433	19075	22693	28867	24982	15768	23283	24959	33641	20728	33653	27052	43792	19364	32462	29491	26404	19133
358222	99.5061	26601	38335	27699	34439	29664	33502	36809	33791	34554	35537	38254	26057	28057	37653	31872	35734	34682	34450	27826	35063	39572	31953	31630	30300	25306	27791	27953	20150	16751	22520	30150	23052	18612	25005	25699	29051	21803	30705	26901	34971	19884	34080	24658	25999	21121
360190	100.053	25884	48069	25317	29953	31826	29479	23803	32277	28439	30878	28346	23641	25618	28739	27225	34751	35375	36520	28242	34924	33352	25202	27387	27179	23456	25583	27745	19387	22242	22867	24658	21895	15260	24462	17780	23838	20543	31953	22682	32497	16959	21456	22000	20508	18728
362158	100.599	24878	26369	23641	26497	28855	25086	23537	31433	31225	31618	27722	26728	26473	29445	27687	27965	32161	40254	30774	30658	33953	30312	24867	30115	22127	27953	26497	19502	24682	22416	22289	23364	15514	21768	19283	26959	21167	27630	24531	39919	14948	26624	23040	19502	18289
364126	101.146	18508	39560	23248	29653	27549	25225	28080	26728	31849	34219	28994	20554	22959	27942	23803	31468	37653	35075	27757	27907	30589	22635	25040	23549	20705	24890	26265	24462	24034	21606	23283	24104	13768	19005	21710	27294	18693	27421	20601	31017	15283	26728	26843	22011	14427
366095	101.693	19341	35607	26774	29976	27248	25410	21884	26011	26150	30150	31398	22000	26254	30323	25479	28427	29063	36901	23132	24809	32289	28797	24855	27942	17133	24346	28115	19791	20404	18034	27953	21965	13919	26485	22913	28809	18635	25907	20682	33803	18323	27768	19826	21063	13029
368063	102.24	19271	31167	23341	23202	26797	23849	23005	27329	33364	29791	34878	22751	22774	27260	23190	26913	38381	31260	22554	23028	28300	22843	24913	21699	18936	20531	28462	21098	18959	21884	21965	28739	12797	20763	22693	26809	20462	22913	23040	31260	12485	23202	27583	22323	15445
370031	102.786	21734	30947	26994	27387	29560	26231	23156	27479	32971	27387	27942	23109	25028	29225	22069	27525	33225	32381	22335	24416	27537	28369	25965	29479	18844	20011	27260	22393	18346	21722	26520	21803	16612	20069	22092	32497	19965	23734	20323	35757	14497	26878	24069	20335	20474
371999	103.333	25780	33410	31768	22092	24647	24901	22277	28994	38948	32312	36034	21040	23317	33317	26127	31213	31537	33583	23722	27676	25560	24312	22439	27433	18705	25364	27086	17687	21237	24994	27063	19711	14150	18647	21595	24416	19144	28543	22450	31861	16612	23502	28335	21514	17225
373968	103.88	22647	36161	36150	20092	22612	24046	27005	29040	27375	32300	28127	22774	25051	26855	27861	34924	33572	33364	22716	26011	30936	21965	25236	26312	16844	30161	27791	17618	23421	19398	21294	22358	16266	27664	22520	28589	18855	25028	18982	29999	16601	26069	26716	24057	13792
375936	104.427	26173	29479	29236	23190	23595	27121	22000	30184	32739	30890	30531	23017	21734	35803	25306	26693	32809	31468	39988	24023	29456	28554	22520	29526	19075	21872	26092	18219	22739	20219	20658	19618	22335	21179	21653	32254	17375	21895	19537	26878	17294	21098	26739	25757	13780
377904	104.973	26739	39445	27433	22277	19965	26427	29895	27630	31468	23179	27734	19017	27872	36416	25040	35283	37653	36485	26277	22959	31884	26543	26150	29213	17271	23976	24705	16936	22104	20716	24716	23144	17179	28508	21364	29606	17086	19583	25514	33445	19537	23387	24820	25895	20982
379872	105.52	24890	36046	35121	29468	21780	25549	21641	29537	28589	19237	26554	26473	24531	30809	28693	29791	33364	38936	37502	23109	26716	28369	28219	30658	17791	26601	28219	19398	20716	24554	28346	20289	15965	24000	23317	32080	19294	21699	20867	31965	18393	28728	26739	23491	18520
381841	106.067	26161	30219	30497	21895	26624	28497	26947	34289	26809	22289	32578	22462	19919	32115	29445	25098	31988	36242	32127	30716	28739	25630	27398	30508	15930	27895	27387	21976	22231	25167	24786	23491	18185	30335	21942	30289	20497	29919	21872	27687	18971	30901	27838	26635	19618
383809	106.614	33236	41052	35502	22161	23780	28762	30462	30196	27687	28543	30531	21433	21387	30184	27630	21849	33595	33271	23630	25641	26057	26057	26369	29699	18901	32947	31942	17630	24485	34693	25456	27445	16705	28034	16601	35826	22670	27456	24242	32404	25387	33595	31306	31329	19306
385777	107.16	29838	34786	25514	30439	22034	20161	25953	37595	30739	31132	29491	20635	18739	31202	24520	18855	26173	26774	17468	21965	21283	26173	23190	23017	17271	29190	29965	18231	27525	32277	25144	29676	21618	32670	20982	28774	25618	28358	25988	31098	18069	30971	28797	30265	17653
387745	107.707	32323	30127	28497	22219	19606	17699	24670	36589	28774	24208	34843	22959	21930	30254	26381	26080	29375	28867	16890	22578	26855	26173	33086	24381	19237	27710	34416	23745	23456	29653	25294	26890	23052	30820	24901	38393	26161	28959	26497	32046	24612	29294	32612	29722	17468
389714	108.254	32173	27745	24069	22797	21722	18809	22763	33086	27271	24832	25445	18508	18601	29630	25445	32092	31491	26647	20763	25861	30843	22416	25410	23560	22485	25433	26705	20369	22462	31213	26184	21745	18416	34531	31491	30728	26196	28820	22335	35803	23410	33734	30716	31040	16624
391682	108.801	32971	26358	28994	23028	26728	20913	26184	34982	26288	32046	22369	15260	22104	31988	25329	26346	29514	35075	17526	27283	25861	23236	18994	28404	21618	32358	30566	23884	21872	23872	25190	29098	22346	27375	27306	33468	27352	31329	22566	34000	23468	31005	27225	26786	14832
393650	109.347	29445	39179	34971	25942	23699	25641	27791	33780	29618	30658	32716	15237	23549	30612	26971	32901	34381	32658	15156	24739	26080	24635	22104	26566	21676	27421	28924	24520	21109	31445	29572	19711	21202	27306	29179	28647	25641	31572	28658	27549	23271	27560	28127	28913	20254
395618	109.894	36219	44485	31167	26693	23826	29664	24138	37803	31329	27456	31768	15780	24439	28832	32208	39283	32173	27121	15861	31953	27849	28450	20485	29433	20728	26797	29179	20705	19895	29907	32115	23791	15919	34358	32416	29630	26705	31838	24184	27375	28231	27930	31028	23826	16289
397587	110.441	30439	35861	34277	25387	23895	24242	24797	30450	29745	35329	29919	20404	24393	29491	30994	34231	32693	32312	15468	37329	31803	28624	21190	26277	17815	31144	27329	24497	23260	23144	27560	29491	18531	33953	28658	30820	24346	30670	22092	32543	25999	28936	31653	29861	17017
399555	110.987	28786	32797	30450	31872	18786	26473	34092	31063	33745	31849	32115	21791	26416	32612	32520	36000	30231	34913	16266	27329	31803	26381	21213	29976	18612	36185	30462	22219	26439	25098	24381	23190	14844	23317	31040	25734	23895	27225	23017	36057	23526	23895	25109	22531	19352
401523	111.534	25919	31988	29421	27421	18346	24323	23757	30462	27341	35098	29549	22184	21213	30959	34936	28416	37803	33549	16057	26762	29861	24161	25433	26011	18774	29630	36612	22323	20369	25017	24265	23213	17156	23572	30127	25768	23260	33121	21641	30855	24497	22497	27271	23757	18277
403492	112.081	23213	28890	33445	32774	17942	26797	31202	32115	34705	30739	30231	23144	28369	35595	37896	26104	33121	27745	18104	26046	34485	29445	29606	30554	17815	28682	29028	23722	19040	25306	27745	27028	20635	24878	26531	34832	22057	33653	21398	30369	21606	33341	28670	23895	20774
405460	112.628	21768	34369	27791	29109	18647	26023	25352	29560	32393	36000	33202	23398	26855	30277	30057	33121	33491	27202	28242	26890	30566	31861	28647	30959	19086	27988	27895	23167	21237	29815	29063	22346	25988	25445	25699	30300	20647	27040	21433	33930	24462	29907	30878	33572	15167
407428	113.174	24543	31317	26508	25907	23583	23595	29768	37526	30647	31260	29838	24312	26346	30866	36023	30543	34208	28254	21468	27051	32820	24797	32682	30034	18081	30855	31930	19028	18138	26832	27722	20092	16936	28890	25976	29341	18901	28416	23225	28762	24092	23757	24855	30057	18173
409396	113.721	23248	27491	25017	24393	23225	25375	22693	28820	31791	32404	24196	20450	24982	30335	31341	33179	42208	34751	21815	27179	32080	27872	32913	28265	17156	27445	24312	17896	17965	24647	26612	22901	17491	24728	21502	27502	19086	31884	23965	25190	19583	25953	22358	23156	16936
411365	114.268	24381	36000	23225	27930	20000	25502	22578	26462	28011	25398	25479	18508	29364	32682	30485	31040	38485	35410	25479	28947	31803	28820	36705	32208	15306	27502	24994	19491	19317	23965	24208	23144	21190	29687	25375	23156	18127	27017	25063	28901	19271	22289	21872	24358	15387
413333	114.815	21109	36855	23988	27317	24762	24265	25005	26936	29653	30023	26069	22543	27236	38219	38624	35988	32231	48266	33491	31271	28878	31757	34855	35838	16520	28473	24890	20381	20023	25872	23479	21433	13433	25341	25190	26138	20867	20994	22485	31976	22878	22404	31375	24138	14890
415301	115.361	24462	23780	23549	26578	34566	23017	22763	24936	26809	26971	23502	21098	26439	42023	38820	36508	35618	39040	30508	30231	34728	31421	36658	35398	17121	26855	23317	15884	22647	21202	24774	21780	15086	25202	20948	20763	21606	26682	22624	25502	21121	25676	22138	24843	14439
417269	115.908	21572	26358	26774	22474	22312	22150	20890	27895	25815	26439	23248	18427	30520	39942	40451	44081	44358	38624	28127	30855	37942	27537	39965	38531	13583	26578	24658	20404	17549	18901	24057	19653	14115	21583	21132	24381	17965	19676	22196	37075	22624	26878	20462	23433	20138
419238	116.455	21329	26739	25271	23618	26716	26069	18011	25942	24173	27433	26774	18959	24843	37734	36046	32647	35075	39687	25525	27364	32369	27144	31109	33537	16231	25930	22046	17329	16982	19271	23641	19468	19572	20890	19398	25791	16092	22554	23491	28520	20867	20300	22034	26878	20416
421206	117.002	21780	25132	21664	24231	26115	21861	23664	25641	25445	27525	29479	20462	29271	28208	29583	34381	29572	36023	20462	25930	36011	33063	32358	29421	14508	23999	22289	19838	18705	24069	23098	21248	12659	27086	20161	23641	16659	23375	22647	32369	22832	22531	18138	24300	18000
423174	117.548	23329	32959	19121	22520	24520	26890	22832	29849	27734	26254	25236	20080	25156	32786	25132	31190	33884	47572	22554	25895	43618	27271	33317	27595	15560	24901	19156	18751	21329	17988	26566	16185	11329	24554	18150	23653	17387	22728	18878	25040	21895	22242	17468	25375	23028
425142	118.095	22300	31525	21063	23294	24219	25734	23121	26046	24589	27271	22693	17318	30635	33005	28219	30497	30947	35190	15641	26427	32046	26739	34369	28670	15040	22624	20739	18335	19352	19271	23895	14786	16728	19260	17364	26705	13907	20393	18508	31109	16936	18763	18393	24774	16809
427111	118.642	22994	28300	22924	22971	28473	23306	27907	27375	25144	29421	24219	19872	28173	33121	26323	43849	39098	38589	22728	29421	30358	27849	35225	34404	14381	25572	21468	18115	21156	19433	19456	20208	17375	26011	16104	19190	16023	19156	18589	27595	20000	20797	14404	25479	12127
429079	119.189	22381	24936	20289	21687	23005	23075	26300	25086	22173	28288	24751	16797	26219	29479	27907	30219	34647	33468	23595	28971	32924	30497	32369	29260	14647	23040	18832	16682	15341	21618	23687	16393	14081	18994	18081	19375	18127	17745	20312	24693	18289	21572	16959	18647	11849
431047	119.735	22184	23098	27098	21711	21421	18647	27352	33757	21618	26427	25213	16092	26450	28439	29306	29884	25445	31502	20786	31352	31872	27664	28901	30184	13110	21745	19664	14312	18508	18589	25583	15052	11526	18982	15572	26346	15144	19687	19849	34739	15537	21526	18069	19930	14416
433015	120.282	23468	25121	22994	22635	28728	24323	21132	27202	22335	30104	20670	18797	24913	25132	26080	33433	28439	32427	26936	25838	29375	33595	27121	27687	12347	20289	19826	16323	21098	15167	18104	14104	12578	18508	15133	22289	14647	20890	20462	26867	19965	19641	20057	20219	12127

## Sheet: Ave 5
0-72 hours: 12-12 Light-Dark (LD)
72-120 hours: Constant Darkness (DD)
Period analysis: DD, 72-120 hours.
Time (hrs)	TD2/+; ptimTIMLUC/+	PsiRNAiKK/+; ptimTIMLUC/+	TD2/PsiRNAiKK; ptimTIMLUC/+
0	19357.2	19683.6	28072.2
0.500278	24546.8	21594.8	26182.1
1.00056	24352.2	19561.2	21681.7
1.50111	25755.8	16481.2	21586.9
2.00167	29008.2	16003.3	22933.2
2.50222	31216.4	16330.2	25580
3.0025	36834.1	20308.8	31672.5
3.50306	40733	24019.8	35560.3
4.00361	47752.3	29260.7	41838.1
4.50417	52671.8	34302.9	46574.1
5.00472	58157.8	37228	50530.2
5.505	62766.9	40333	53479.1
6.00556	68042.9	44100.2	58798.6
6.50611	79238.6	47021.2	64643.4
7.00667	78714.3	53420.5	68621.8
7.50722	83409.4	54180.7	70288.5
8.00778	83375.8	55428.4	71099.4
8.50806	90689.8	61987.7	77400.1
9.00861	90652.2	61483.6	81743.1
9.50917	90524.2	68156.8	84516.6
10.0097	98939.8	71682.2	86789.2
10.5103	96170.2	76761.6	89667
11.0108	95542.2	83785.8	91654.6
11.5111	97005.8	77601.8	92198.4
12.0117	100539	84963	96809
12.5122	111717	95126.5	106046
13.0128	120779	100103	116626
13.5133	132914	107654	127225
14.0139	133679	112127	137483
14.5142	141934	114155	139985
15.0147	139502	118522	146791
15.5153	149377	124404	147440
16.0158	148163	121203	148738
16.5164	151420	127516	151453
17.0169	150261	119566	152136
17.5172	145836	132899	151164
18.0178	153018	121657	149316
18.5183	143996	119436	147322
19.0189	144266	119452	146832
19.5194	143635	117177	142685
20.0197	131270	112766	140885
20.5203	126216	103458	136190
21.0208	123551	93212.9	124413
21.5214	127109	82744.8	119927
22.0219	115250	70848.5	107439
22.5225	103585	64745.8	94160.1
23.0228	96691.7	51693	91851.3
23.5233	93737.1	55734.7	81911.6
24.0239	68420.5	56575.7	81148.1
24.5244	58310.7	44747.6	61328.8
25.025	50331.4	36014.2	49580.4
25.5256	43736.8	31193.3	43219.6
26.0258	40326.3	29952.6	39299.3
26.5264	36869.4	23781.8	37493.3
27.0269	30851.9	20904.2	31749.3
27.5275	29514	19252.2	29031.9
28.0281	30199.9	17291.4	28175.8
28.5283	26789.6	15834.8	26810.5
29.0289	26360.7	15548.8	25729
29.5294	27053.4	15717.4	26127.3
30.03	27553.5	15679	25960.8
30.5306	27970.6	15300.2	25546.3
31.0308	29453.2	16418.9	27856.8
31.5314	30982.2	17718.2	28120.3
32.0319	33124.7	19264.5	30966.7
32.5325	36235.6	20381.2	33002.9
33.0331	41710.8	24101.7	35856.2
33.5333	43927.6	28717.2	40245.4
34.0339	44032.7	31425.5	43464.7
34.5344	41442.8	32221.2	42910.8
35.035	39399.5	31733.6	44453.6
35.5356	37473.6	30867.5	46097.8
36.0361	42246.5	35093.1	49466.6
36.5364	64450.2	43854.3	61305.5
37.0369	92421.2	52134.4	78727
37.5375	112807	62995.6	93865.3
38.0381	115076	68356.3	97501.3
38.5386	126832	72516.5	104673
39.0392	140383	80643.2	111158
39.5394	142140	82962.1	120555
40.04	144596	88359.7	123489
40.5406	141278	93723.5	124378
41.0411	144768	95330.6	124343
41.5417	143624	98715.9	124112
42.0422	139432	96695	116800
42.5425	145735	101942	122034
43.0431	139643	93748.6	125679
43.5436	147122	91984.2	125362
44.0442	129279	94169.1	115929
44.5447	127986	92376.4	112370
45.0453	118573	85122.1	111502
45.5456	116097	76985.2	106205
46.0461	118500	68719.6	103030
46.5467	105671	62202.3	94781.6
47.0472	89830.2	49165	81176.9
47.5478	78503.2	40883.2	72139.4
48.0483	58038	39234.9	66404.9
48.5486	49577.1	33543.1	50611.8
49.0492	40190.3	28430.2	44587.2
49.5497	34193.3	25437	37305.6
50.0503	30379	21960.9	33389.8
50.5508	28625.8	19451.4	29811.7
51.0511	26301	17457.2	26426.8
51.5517	23506.2	14777	24441.2
52.0522	23253	13524.7	21761.5
52.5528	21868.5	13430.2	20175.3
53.0533	21144.1	12073	18994.4
53.5536	20376.3	11650.1	17583.5
54.0542	20419.5	11650	17093.7
54.5547	20549.7	10974.8	17433.8
55.0553	20529.5	11497.8	18459
55.5556	23277	11986.2	18295.5
56.0561	24278.8	13341.8	19420.4
56.5567	24929.1	14642.3	20704.2
57.0572	25898.3	16582.4	22271.2
57.5578	29025.6	19362.9	24641.8
58.0581	29143.9	22362.8	27947.4
58.5586	30685.4	22804	30511.2
59.0592	29922.4	26150.8	32396.6
59.5597	26478.3	28242.2	35448.1
60.0603	32960.2	33667.3	36639.5
60.5608	39731.9	38335.8	46913.2
61.0611	58444	40249.5	53623.5
61.5617	68444.4	51072.5	56671.2
62.0622	77663.1	48076.4	62954.2
62.5628	85453.1	52532.3	71196.1
63.0633	93874.1	56876.6	72182.3
63.5639	91640.7	61106.1	75740.4
64.0642	100386	62789.2	79410.7
64.5647	97982.6	67645.2	80994.8
65.0653	99255.5	69703.2	78524.6
65.5658	103879	65014.1	85064.1
66.0664	104751	69825.9	79702.2
66.5669	100998	62010.8	81234.1
67.0672	99103.2	64660.6	82369.5
67.5678	91164.8	59659.9	76830.1
68.0683	93338.3	61676.6	76743.6
68.5689	86174.6	59410.5	76069.4
69.0694	89553.8	58449.1	74114.4
69.57	80651.8	54173.5	72497.9
70.0703	78018.5	51921.6	72645.9
70.5708	76899.8	46532.7	63209.8
71.0714	65865.3	32396.5	54801.6
71.5719	65407.7	34690.4	49127.8
72.0725	63034.7	31688.4	51571.5
72.5275	53869.2	30833.9	47122.1
73.0278	47511.5	28832.8	46343.4
73.5283	45044.2	28630.5	45688.3
74.0289	44590.3	26299.2	42107.6
74.5294	44049.8	24276.1	38840.8
75.03	40771.2	23671.1	35676.5
75.5306	37436.1	21622.9	31911.7
76.0308	34387.9	20736.5	29270.5
76.5314	32610.1	18667.2	26049.2
77.0319	30172.1	18262.6	25970.1
77.5325	30446.7	16312.6	23460.8
78.0331	29974.4	15104.7	23704.2
78.5333	27974.4	14804.1	22718
79.0339	30090.1	14471.6	21318.7
79.5344	27241.3	14480.4	22559.1
80.035	29173	14920.8	22495.1
80.5356	30978.2	15529.4	22592.6
81.0358	28780.8	16708.7	24403.7
81.5364	29743.2	17050.7	24429.5
82.0369	29390.7	18698	25007.7
82.5375	27851	19385.9	26599
83.0381	29151.8	21238.4	27263.7
83.5383	26521.7	19616.2	26978.8
84.0389	27346.4	20286.7	28761.4
84.5394	23480.2	24142.2	30456.8
85.04	26174.9	24693.2	30512.4
85.5406	30913.8	26604.4	32318.7
86.0411	34845.3	28210.6	33437.2
86.5414	41872.6	30514.2	36058.1
87.0419	46100.1	32200.9	35369.6
87.5425	49672.6	33905.3	42353.1
88.0431	47366.1	34349.4	41405.6
88.5436	48141.7	33025.8	41475.4
89.0442	45006.6	35598.9	38316.9
89.5444	46211.8	37130.7	39477.2
90.045	45907.3	35784.8	41180.8
90.5456	44290.7	34125.8	41892.9
91.0461	43387.2	37121.8	40526.3
91.5467	47903.6	35526.6	42305.7
92.0469	46684	33026.6	45451.9
92.5475	42061.4	35656.6	43271.5
93.0481	44936.2	38426.6	42997
93.5486	43189.6	33028.4	40774.3
94.0492	44861.1	31625.8	37721.2
94.5497	45549.9	31841.5	37460.9
95.05	42535.2	30655.7	35867.8
95.5506	42788.9	28233.5	34530.2
96.0511	39709.6	27838.8	35490.3
96.5517	39778.1	27848.2	35292.7
97.0522	38841.5	25143.1	32687.6
97.5528	37441.8	23256.8	31998.9
98.0531	33686.3	21852.2	29428.5
98.5536	32583.4	22253.8	29949.4
99.0542	33411.9	19409	26738.2
99.5547	30944.7	19940.8	25769.5
100.055	28685.4	18015	25344
100.556	28400.2	18485	24988
101.056	25377.2	16399.5	22054.5
101.557	26625.6	16795.5	22929.7
102.057	21738.4	15219.4	22526.7
102.558	27241.2	16289.5	22537.7
103.058	27015.8	16238.5	22177.6
103.559	28036	16055.5	22838.9
104.059	27151.7	16391.8	23825
104.56	26833.7	19437.8	25157.3
105.06	27106.4	17733.6	25579.9
105.561	28360.6	19389.9	25950.3
106.061	27833.8	19638.3	26498.9
106.562	27703.8	18753	26524.2
107.062	27292.2	19994.8	24535.9
107.563	29405.1	18048.8	26061.5
108.063	29373.2	17405.2	25433.2
108.564	24554.2	18462	25485.7
109.064	23669.1	17959.2	24541.2
109.565	24336.8	20363.7	24954
110.065	28384	20082.3	24049.8
110.566	29900.3	20795.3	23866
111.066	30269.3	21489	23945.2
111.567	29474.5	24104.6	26204.8
112.067	29329	25803.1	25726.1
112.568	28319.2	23214.3	26068.8
113.068	26463.9	23527.5	25135.3
113.569	27154.7	22839.7	23174.2
114.069	28313.6	21806	24539.5
114.57	25706.6	24391.6	23290.2
115.07	24314.3	22113.2	23694.9
115.571	25038	20891.7	22325.5
116.071	23195.1	23044.9	22742.3
116.572	23030.2	23393.6	22512.2
117.072	22729.8	24617	21539.4
117.573	22988.9	25600.8	22650.3
118.073	22686.4	23823.2	21093.2
118.574	22412.9	22850.2	21842.8
119.074	22653.8	22228.8	21356.8
119.575	22955.4	21500.5	20194.5
120.075	21135.2	21113.2	19588

## Sheet: Wells 5
		TD2/+; ptimTIMLUC/+ Wells												PsiRNAiKK/+; ptimTIMLUC/+ Wells												TD2/PsiRNAiKK; ptimTIMLUC/+ Wells
Time (sec - from reader)	Time (hrs)	H01	H02	H03	H04	H05	H06	H07	H08	H09	H10	H11	H12	F01	F02	F03	F04	F05	F06	F07	F08	F09	F10	F11	F12	A01	A02	A03	A04	A05	A06	A07	A08	A09	A10	A11	A12	B01	B02	B03	B04	B05	B06	B07	B08
0	0	41745	15422	15225	14081	14081	18647	15121	14474	36185	16936	12162	18208	14404	15237	18208	22971	25722	11341	33144	20138	12890	20693	20612	20843	14266	13930	20959	17294	14682	10185	56891	20797	14254	17052	14705	11121	19988	37653	26913	39167	10670	11503	27468	161945
1801	0.500278	42011	19190	20080	16578	19109	18589	24578	21618	52116	19109	13445	28138	23699	19098	20381	24843	27329	16450	27421	22208	19560	24601	15618	17930	25005	26554	25895	28340	22080	11630	24913	32046	17919	20716	11191	18092	19422	45144	48590	46925	10485	27838	38404	22453
3602	1.00056	38647	19803	23630	18034	18705	16901	24485	19491	48555	22289	18046	23641	21144	12948	17213	18705	23930	17722	23583	21572	19780	20843	17896	19398	19514	25653	27999	23168	19930	13514	22658	20763	12173	14589	8693	14046	16300	38624	37826	56960	7745	21052	17225	15202
5404	1.50111	37791	21248	23768	19040	20658	20624	27560	21098	54093	20601	17722	24867	19514	11029	13953	17676	19537	16138	19560	17780	12162	22335	14612	13479	19953	27734	27456	21479	16578	9849	21630	19398	12462	15040	7757	11965	16150	48312	52925	40081	7387	21872	18173	15537
7206	2.00167	45017	26404	27791	19849	26231	21375	30115	22878	57804	24520	20843	25271	17687	12913	12855	16023	19410	18323	17502	16034	12439	23109	14312	11433	20485	30924	26601	25156	20462	12254	21722	18635	14115	15422	9838	15549	19398	45156	48890	44971	7722	26080	22046	13237
9008	2.50222	42589	28080	25630	24335	30739	20728	32971	24982	63897	25803	22751	32092	16289	12208	12844	13688	22358	16393	20959	17352	11584	25260	14797	12231	23421	31317	25040	27317	23121	17341	24427	20289	15329	23144	11375	17052	22439	45341	48405	53307	9098	28161	27815	17861
10809	3.0025	51330	32289	30843	26716	38913	27086	37734	31109	69423	30254	26971	39341	21121	14196	15826	17780	32312	18948	26994	19317	16069	28369	18289	14485	29919	38543	38543	36300	25445	17479	27479	30312	24265	25745	15352	28485	27803	49295	53607	60209	10196	34658	35121	24693
12611	3.50306	56856	41063	37144	30416	37757	28023	43711	37433	68764	35676	29364	42589	26138	16982	17167	20196	34878	19468	32358	22242	20474	37757	23872	16705	36728	40913	44670	32751	37086	19815	41248	30809	27225	29398	15445	30994	33768	54925	63804	58463	12242	36601	36820	27502
14413	4.00361	65596	45399	35583	40427	48936	35895	55330	42948	76094	37838	39699	49283	29595	24450	24670	22439	45954	25005	40416	28439	21260	43676	26947	18277	49040	46994	46462	45491	42705	26543	37526	37341	28577	39086	21780	33364	36335	60845	76823	65677	16081	51306	39190	35595
16215	4.50417	73747	49780	45688	43688	57758	40370	63319	44092	75655	46335	40555	51075	32450	32924	28473	33144	49607	26612	41121	31398	31791	53434	28508	22173	48485	53272	57457	49410	44844	28728	48728	36751	36312	45063	25549	40740	50497	67966	79378	74106	15572	47584	48971	32069
18017	5.00472	76927	59168	53307	49341	61527	45017	69574	53422	76037	51422	45792	56359	40612	27225	29341	33583	53804	26404	50601	32323	32393	58486	33849	28115	55734	59342	58128	49133	48000	26427	55075	43803	39398	51306	26473	46566	53619	72788	78465	79031	19930	59353	48994	39040
19818	5.505	83205	64348	56867	55758	72753	47168	68013	57411	92420	49584	46092	59584	45988	36820	34173	33190	56960	29988	49399	36820	35826	61585	35953	27294	61168	57284	66198	60810	50382	30335	60486	48150	41040	53908	32069	46682	52463	75990	76730	77644	17387	59503	57388	43965
21620	6.00556	85992	79390	66394	61874	73805	45896	82569	61480	84454	57677	49283	67701	46902	44323	33572	44323	71516	32797	49884	41653	34786	65897	35815	27734	68672	60521	58139	66823	61504	32474	70753	55850	47803	58602	36855	56486	60902	79551	74094	87414	19433	73007	63608	43480
23422	6.50611	109267	76684	75736	65261	99739	57469	83991	72129	106665	64047	69238	70637	55526	35976	35109	43688	75401	39005	60706	42358	32450	65839	45295	32901	74430	70776	72533	73100	68961	32705	67307	58417	54243	69319	43225	50462	65700	82130	99774	84616	23213	68741	65712	67504
25224	7.00667	95461	73505	78557	66348	92732	58081	92547	75008	97785	63134	67018	84396	54775	42936	38520	53168	86916	41734	65874	52000	43179	80904	46532	34508	76638	75227	78280	77852	75123	34289	75794	64475	61411	67735	43190	61827	66198	96224	89703	92038	26115	82789	68533	58995
27026	7.50722	102791	85922	80476	63931	100167	59573	99219	84361	105035	70845	71863	76730	53619	53815	39318	45826	86419	45364	59700	48231	43433	95241	43399	35803	77517	77621	75470	81043	79933	40462	80523	63654	56775	82315	41792	53977	68498	94848	109105	84939	31537	79216	70845	55700
28828	8.00778	112816	82407	89460	65515	85506	59573	95507	85783	113568	57584	71608	81182	62637	57284	43780	45410	92096	40370	63735	54405	38150	87414	39479	40381	79702	74383	80950	74661	69377	38543	74684	76256	63434	80395	38728	54185	70279	97565	93842	89680	28508	89923	75320	71574
30629	8.50806	116505	92131	84303	73377	106515	68117	104942	92489	113799	66984	76615	92501	65550	67250	44532	53792	99462	50000	69146	53746	53526	92293	52833	41722	92096	82962	92200	84003	78522	44404	89899	83390	60833	80615	45491	67597	76892	106202	113233	97565	27017	87390	76453	61238
32431	9.00861	107682	101508	80118	81216	98583	74302	107648	89738	103289	66475	84789	92478	61966	52254	50139	53549	93622	48590	76938	60359	42751	95762	60775	41098	96976	84234	94952	125502	82338	45480	83980	76592	78892	90397	46959	64822	75378	119002	98028	100595	31514	86107	81517	71597
34233	9.50917	109706	96791	78569	78800	102098	65030	111995	85483	124738	68475	78349	86257	76707	56694	57966	51237	110307	52116	78626	66637	52000	110585	57700	47306	87703	87252	106133	87841	80222	52116	85240	90443	84130	107232	48243	71065	77227	106145	114482	98629	29306	98120	87818	90986
36035	10.0097	138752	98051	86153	80257	129779	66151	110099	96883	122668	74892	70452	113140	74164	58613	68996	57931	122055	53006	78083	72672	56891	111822	56752	49202	92790	96374	109417	88512	84662	56775	94467	81320	74892	91056	48855	77817	99936	119916	118540	108596	24439	100421	93634	73366
37837	10.5103	126564	99716	70683	88685	105474	81297	101739	100063	112724	75250	77898	113949	78152	71389	64579	52624	113868	65770	99739	82881	53156	120679	67088	51214	108353	95866	103913	85344	92131	54278	103485	87379	71447	92906	58798	85980	83459	110712	116019	113799	26242	100305	108758	94166
39639	11.0108	127478	99589	80950	78719	111325	70799	98779	98675	119222	83159	71828	105983	82766	101277	74418	74719	122483	61446	102352	84257	54000	127316	72152	48243	115129	90975	115799	79320	102387	55515	95738	90212	86489	93680	63053	66926	104896	118031	114019	105451	37260	107625	112643	77944
41440	11.5111	118655	94813	82176	81852	119615	91553	104503	99265	121211	79540	64926	105960	85991	73990	78060	59064	116273	68013	85413	84662	44890	116956	71539	46370	105809	95981	139897	82638	93865	53861	87448	90570	89749	88674	59319	74013	99334	124691	117188	107971	41190	102838	100005	88928
43242	12.0117	120610	108261	85413	87205	113464	80465	115106	103092	119511	105520	72707	95114	96085	117337	65515	61053	110642	68799	108908	86049	54544	130265	68209	52150	120748	102190	110966	85691	98860	66753	111197	96236	77632	96062	58209	84951	105428	118031	126588	123385	43954	101600	116678	91021
45044	12.5122	130808	116875	100699	91414	154860	82407	125061	116551	125697	107648	80303	108284	101242	92085	75563	67307	117511	69550	140209	112493	59954	152166	92316	61122	121211	113522	110700	98363	112377	59769	113868	120621	116944	110307	71493	81910	97276	144187	141238	125570	39445	138891	98432	104803
46846	13.0128	146650	149448	109949	103450	144488	91518	126807	126854	134266	100930	88639	126345	102375	94721	107740	78950	133248	72614	121107	102248	61203	170945	84546	71539	145089	134566	105809	118158	126541	67192	125339	112030	118864	120147	70001	121997	127143	139885	147714	145863	37213	139261	121639	108075
48648	13.5133	151275	160515	115268	106850	208126	114077	136613	137526	133329	106214	108249	116921	111914	104734	96455	84327	154085	84361	147055	111533	63215	158653	102572	72950	140995	138116	143377	130635	142660	62405	133398	148327	116054	135711	88200	110030	130704	158711	141250	137885	54740	157392	138463	135445
50450	14.0139	166956	153149	118944	121465	158676	103370	139272	134716	153912	113256	97403	143030	128114	100375	112909	77713	162457	89379	147760	122726	65354	180786	90038	67909	159069	163128	163128	140151	157208	78049	138324	118019	135330	133155	84176	135434	152674	167592	161891	184765	47572	156005	133040	140950
52251	14.5142	173952	142568	142290	122113	170448	116933	153345	149182	145274	124784	105844	156479	127085	101762	109313	77135	183504	93021	151692	119280	71967	176438	95681	62983	159347	153033	190616	125801	146684	70695	146766	139458	119257	157439	91599	137850	145829	161579	187980	171373	50636	155045	132045	156664
54053	15.0147	165117	147748	121893	124402	147401	106873	140718	148003	156502	136775	113151	165441	122020	111140	97288	88951	176138	94212	156375	133202	65862	189691	114030	73354	148616	155485	208126	123685	143146	93831	155669	166297	150304	158630	97450	135711	159809	168621	172726	181018	47144	179757	145736	144060
55855	15.5153	191854	163105	157231	130808	174484	115614	142984	159116	168228	124171	109671	155253	130438	114111	110122	90165	175478	112978	158780	130195	62671	205789	118309	83818	166667	161983	196734	148847	158884	81621	151275	153160	124391	170217	93796	131999	157369	154733	191623	183284	60035	163186	145413	153577
57657	16.0158	153958	168413	140602	134138	164921	115476	150350	169130	159208	126958	126507	168297	148535	103508	126391	91900	162018	106711	164574	116435	68232	183770	98652	83714	169084	154143	208334	136763	162007	81343	142603	164932	125836	167037	100803	124287	158560	178636	172275	190986	45930	195994	149148	146060
59459	16.5164	174554	175814	135653	147055	161475	114655	143308	161787	147043	142175	139435	174091	140036	143320	110585	88327	158387	108284	182984	131722	64995	188835	120957	91761	154999	144083	199833	142048	168193	93253	157069	171420	132115	169049	107255	121754	154432	170124	172749	194398	44693	195983	156259	179353
61261	17.0169	210335	151079	168182	132785	163441	107948	142406	161937	157277	124784	127304	155658	149934	109486	111290	93276	144094	104607	167326	106075	63955	189761	105012	89980	166285	158248	217875	157508	171859	82696	162226	174276	129744	174866	89564	130392	168367	184753	181608	180509	53445	175363	140035	143111
63062	17.5172	182070	154004	147795	146627	166135	93264	143805	168170	139700	124830	124818	158815	140151	161567	123986	80812	155080	120818	223797	105902	59168	236924	111972	74614	169442	170009	206587	153010	148165	90952	151067	158167	136694	160295	103636	131826	156965	179006	183435	171651	54867	171200	168066	158248
64864	18.0178	147344	186661	139550	147644	206483	103705	152131	159243	142753	135711	137619	177375	154421	128449	107440	84546	144742	116990	198920	97461	62336	172021	113360	79193	166181	177664	197405	152328	167569	79852	144372	157023	132022	160538	117742	135584	126761	177965	162515	179318	60648	198955	159104	132774
66666	18.5183	187147	142684	121789	139816	192929	92166	126137	157531	128715	138879	139781	160376	138925	110596	107890	92628	151426	97473	178289	111729	58498	191923	105578	88281	171928	149217	195184	157242	150951	83471	172738	155554	125963	164631	104295	120263	131988	159208	194664	176600	48405	178127	147852	158167
68468	19.0189	142325	163614	121315	149171	166377	121835	132936	152825	121292	163753	144025	151726	144002	108110	94016	73632	151761	94767	195948	118563	61978	190293	117071	83286	166412	149899	198943	178278	138451	82997	160989	141331	124737	144326	98467	128461	148107	155577	210298	165938	50925	181827	152975	157693
70270	19.5194	142267	136451	148477	171096	173408	121280	134219	146847	130380	124853	133722	160619	151692	119893	120367	78939	141516	84477	168806	104931	64186	186025	98837	86454	150246	164239	180266	145343	163614	78349	154849	143158	142291	151692	109961	118170	138047	151379	181714	166054	45491	167638	156861	144337
72071	20.0197	139793	148408	123963	140914	142302	91680	119673	140972	118898	120552	137584	150500	141793	101439	98918	79066	138220	87737	180220	113140	59053	164493	106168	82939	153322	168413	195878	148246	148939	76383	138000	137827	115510	163302	101728	129259	158896	152524	164284	176242	53445	146997	136104	152408
73873	20.5203	130427	145621	127605	140880	138706	101543	114296	138394	111683	116424	124402	124610	106676	105254	100722	74661	131363	91090	150512	124703	52393	143065	83806	77251	140915	151692	219563	140244	157254	87067	123720	125154	100051	146419	93218	119361	148882	156340	173108	177132	48127	159937	134069	121546
75675	21.0208	134832	134636	127651	113845	140429	101080	115441	142672	98964	107093	134208	131756	120610	79262	82766	63353	113649	82847	135202	100028	45653	140880	72753	81552	121847	149992	182093	120401	133155	77840	126958	135283	87414	150917	74984	93276	139805	140857	161382	147980	41595	137989	128056	136428
77477	21.5214	173385	134728	123998	118679	128276	109949	100745	124645	114238	132554	135017	129097	88315	72684	83563	60139	99808	68706	114250	76638	49110	132612	71412	75701	122899	131421	150466	111799	138417	88616	115626	136636	96097	130137	89275	88928	130346	145239	157893	150847	54937	127339	120910	110712
79279	22.0219	121373	134127	113672	122980	120089	111510	104711	117869	101508	111695	108180	115291	65619	77343	52000	44404	87691	51827	95877	75123	40936	110203	78869	70290	111012	129016	142950	111972	125223	78407	109983	96860	91021	102953	62856	81760	108989	128426	139376	137411	39872	135295	122795	92605
81081	22.5225	114551	93750	111117	114354	101994	83506	104248	105636	106098	102757	102699	102306	64856	49538	53156	41526	92385	65874	92755	79632	40971	79551	56070	60636	110018	124102	116227	94478	85645	70418	88292	90628	78349	94987	57376	80870	92570	117858	123292	119118	33583	110006	110076	85309
82882	23.0228	120899	72869	93345	100074	110585	74268	106353	85795	91472	98086	113787	92767	49318	54231	43399	30890	82164	46983	77771	42485	33595	58232	54289	46959	84130	140868	110955	95276	80430	58139	101439	105139	72036	82199	51723	77332	91888	113175	98074	132126	37063	121327	108607	75100
84684	23.5233	107740	83482	103242	96698	98698	89414	93414	96409	94559	72233	81424	107532	54971	42855	43063	50844	60579	48844	91541	73759	28647	71123	54370	48220	89148	100560	78002	88766	81644	49457	83459	90050	72661	81748	58775	62833	81101	108584	109290	108688	37028	91715	101138	63585
86486	24.0239	64336	62671	83841	71967	61527	64128	65238	66591	69655	63747	69435	77910	60001	72510	40901	36774	68995	52439	79251	64961	27976	86072	52971	36057	87101	109174	124217	89506	69365	49341	93530	81621	63978	70094	50081	63307	79020	83795	115950	104630	27745	97762	92015	70730
88288	24.5244	58428	56301	52925	62798	64984	48081	57156	59365	59087	48959	67689	63955	50913	47688	40312	28288	55434	35630	62579	54266	18705	74753	39375	29028	63226	74198	92270	60660	60186	43769	64406	65932	51434	62625	41907	46035	60151	79933	67065	75944	25653	71169	59769	60243
90090	25.025	50150	46011	59954	53006	50590	46046	53156	57157	46266	44508	45399	51734	40682	39884	33236	18589	50405	27364	56763	39144	17283	55885	30173	22762	54925	60602	69597	48196	50705	29965	48670	53503	37398	51295	33017	38231	45017	61770	61457	64521	20843	57480	50844	53572
91892	25.5256	55203	35086	45387	45006	42636	38901	49688	45456	42312	36994	44150	44023	34208	30312	24589	15861	36867	23583	54220	33167	14242	59503	28682	19086	46011	48127	62498	47260	40740	28115	45272	44821	34855	45653	27271	33052	39745	52324	51515	53677	19028	50983	46115	47329
93693	26.0258	40844	35953	39109	44532	51434	32335	41780	44589	37329	32277	37468	46266	29595	40069	20786	12797	35421	17826	63377	35884	13815	44763	29734	15364	43907	46821	55087	36196	37537	21942	41815	44636	33375	36809	23364	28358	36543	49665	40925	51237	15884	47665	46740	47480
95495	26.5264	48636	35641	37352	40774	37653	32947	34913	38242	30774	30820	37722	36959	23317	21861	18150	12936	26832	14566	47318	30046	10878	43537	22242	13699	33433	43618	53630	34254	33872	20693	42046	41433	32543	37630	25745	28751	33572	46058	40578	47722	16439	54601	41341	41907
97297	27.0269	37976	27144	28936	34531	30473	24947	31664	34578	28924	26439	30820	33791	19630	22196	13942	10312	24924	12659	42844	21722	9410	36843	24277	12092	34416	34335	40508	32277	29895	16277	37237	33849	23757	30786	21861	26809	27514	46798	35976	38046	12127	41942	36971	33606
99099	27.5275	33398	30762	27664	28971	40913	23491	31734	29213	27780	23329	25468	31445	23549	26219	12058	9237	27919	11214	33167	20763	7838	29317	18497	11248	32716	33583	38335	32682	25606	14196	29398	30011	24473	33445	16046	23884	23306	44428	29618	37387	12844	36554	31132	30994
100901	28.0281	30601	31248	28658	32612	46139	23942	27445	34427	27213	23283	28901	27930	20485	26693	12901	8462	21560	11792	27976	16439	6092	26797	18300	10000	29745	28439	35086	26878	24404	13375	28208	31722	26658	29341	16404	24786	23364	41005	28612	33699	12578	34994	34971	39248
102702	28.5283	27202	27260	33849	24971	33676	20358	26254	24982	26867	24092	26080	25884	17896	19884	12647	8104	19005	11190	26254	16231	6069	28161	14462	10115	29549	29433	33052	25664	22947	11630	29202	27468	22358	26855	15190	22543	23271	36404	26843	34242	11341	39745	29676	38797
104504	29.0289	27826	25895	23560	29271	29375	23641	27734	30115	25086	20705	27514	25606	15352	15815	10832	9352	21526	10162	28439	17734	6011	27953	13040	10370	29098	26288	30115	27179	21838	14670	25398	26369	22173	25260	15433	23109	21063	37364	30242	32323	11711	33583	28809	32554
106306	29.5294	30901	23803	23433	29814	43295	21317	24982	25549	27306	21803	26820	25618	16462	18196	12242	8462	18959	9757	26208	16439	7491	29699	13399	11295	31329	26208	31502	30289	22462	14277	27838	27849	22705	24023	13641	21225	20751	34427	26971	33306	11676	33502	30497	38069
108108	30.03	30335	24670	26797	25618	38404	23942	26381	26277	27445	19907	32971	27895	14416	16705	12439	8659	17896	10092	31017	17352	9029	27572	13017	9954	26578	27757	33583	27537	20150	13375	30855	31410	23734	24508	13017	17838	20485	36705	28520	36138	9988	33248	28901	34890
109910	30.5306	35826	26786	27618	25456	28797	24797	25861	29907	27317	24358	31156	27768	13653	15722	12867	9792	18554	10289	27040	12370	9271	29572	13722	10751	25791	27433	27514	27791	24127	13953	26728	29583	20566	23942	11849	18682	22774	35179	30473	31190	11919	32219	30138	39075
111711	31.0308	34578	24843	27653	34924	35132	22820	27560	33653	29641	24982	30254	27398	16000	14000	18231	10543	19919	11769	26358	17502	8763	28728	14474	10740	27803	32809	32554	27595	23745	12081	29445	32913	25086	27965	14138	22832	25664	36219	30104	32531	12023	35526	32046	44058
113513	31.5314	35341	24867	26184	34624	39387	24658	32635	32658	34867	25144	34682	26739	16150	11942	15768	11156	22381	11433	29930	19040	10069	36427	17699	10624	30959	29687	36023	31341	27745	16566	32531	33780	24369	24947	13202	20289	24566	36150	32890	33017	11930	38219	30612	33583
115315	32.0319	38566	30809	35895	34647	34693	25722	34878	35063	38219	27942	33641	27421	20092	13248	19202	11618	25768	13930	29815	20323	8647	36127	17930	14474	35606	35179	40254	35803	29526	14693	33687	37086	27676	29630	16705	24843	29075	41179	34937	34138	12150	38774	29514	38878
117117	32.5325	52093	36578	38450	32751	43503	33895	33826	37271	34404	29664	31872	30520	18578	13988	25549	14797	24416	15977	27202	22439	12728	35907	18046	14948	33606	38115	40635	37167	29294	20739	36254	37422	31895	31017	18913	29884	28901	42751	39248	34439	17225	41040	34358	37156
118919	33.0331	49457	37583	44104	36890	43688	37456	43826	38601	43110	37028	45549	43237	21317	17560	31098	20624	27641	17017	33849	26358	12578	40277	25919	14982	36959	39537	39237	43341	40196	21826	36265	40751	35826	28693	19849	30647	36080	48289	37953	37861	16520	44150	37167	45977
120720	33.5333	51214	48994	46751	38497	46613	38173	41514	46844	45029	37734	46855	38913	28890	29017	31502	24462	37919	19884	35098	31236	15872	39803	32057	18867	44000	49827	52798	43884	41479	26971	44243	43248	39711	32335	23421	35456	37387	54081	47468	38728	17352	46231	43930	42358
122522	34.0339	43953	38786	53353	41503	56382	36948	45306	44058	46150	42266	48451	31236	34127	30104	36358	24693	42925	22624	37896	32543	17953	42994	32485	22404	47618	48786	52960	49457	37641	22924	48046	49584	42948	46266	24867	35861	36277	52439	48717	48370	19075	49607	39826	68024
124324	34.5344	42832	41699	45110	37086	49619	41375	43040	43560	51052	34658	35132	32150	34820	25306	37005	27271	42058	27815	38624	28346	23387	46751	31907	23364	38011	47399	52359	49942	39803	28936	44219	50301	38254	35468	21583	38161	50960	51121	49595	55515	21005	51075	37664	56844
126126	35.035	37202	34578	42173	36820	39398	37722	40046	46139	49896	40023	38208	30589	25167	26751	42034	30959	33988	28046	38624	26508	18901	53098	29317	27410	42219	48220	62960	41468	40404	32265	47457	53376	37826	36728	28924	36011	39167	55480	53850	54416	22867	43595	50902	60937
127928	35.5356	40682	28288	45410	39861	24670	33526	32485	49144	47087	39849	34751	33930	19572	31976	37040	35953	26069	28312	37317	25144	21676	44751	37560	25040	42474	47191	73574	48335	36832	29572	47364	55469	31780	48566	37017	41537	44693	67192	48347	56093	21271	36208	52775	55665
129730	36.0361	42589	22369	55885	54405	28173	41560	31421	53515	58417	42451	44555	31618	20624	41283	44196	32057	31687	33699	43052	31190	23757	53260	38844	27468	51665	59781	52844	37387	52127	29306	43456	45029	43665	54093	38635	37838	46404	68996	53838	64706	21456	79239	57873	50994
131531	36.5364	63770	24497	79020	79355	73921	57665	54752	69285	82072	58937	79632	50497	26416	50775	55653	47595	38739	40104	65180	32716	34219	58717	39699	36439	69805	73979	73724	57018	48358	34346	68452	48936	52497	59480	40901	48185	54532	67053	78892	73678	23560	83737	76060	92917
133333	37.0369	77621	69319	107532	94339	107012	104954	79910	114759	105150	77863	94721	75875	43214	46670	57399	40751	66672	39167	79309	35341	34786	82812	57284	42208	92408	92478	94652	49098	86361	45468	92270	79158	74048	75748	43283	68522	64799	104179	101566	82407	34612	109313	89819	94351
135135	37.5375	84477	122101	127027	107440	127582	115603	97542	138660	101994	96525	136208	98525	60128	50936	59087	56486	77066	47792	97762	44532	36751	116123	64209	45075	108238	114435	126738	92906	107694	43711	103196	98051	73007	86893	66995	100965	75239	116112	104988	115117	37537	115314	111382	78788
136937	38.0381	135630	96120	118089	104017	118124	136035	116169	124518	105659	110908	131907	83737	81575	58370	83621	51908	79320	46566	94131	54590	30682	112978	80870	45665	108446	143771	112030	100942	99496	53896	107925	83332	83598	81228	57642	94860	97357	134786	130218	109139	33572	134832	93912	89044
138739	38.5386	147633	128021	127779	109081	135931	117441	105532	137145	117083	127201	144117	125026	76476	77181	67099	58833	90408	56867	98687	49526	37433	118413	86500	52775	98132	140718	104734	95264	113417	46647	111359	97218	101901	100248	67643	90732	95565	146234	129420	108075	46798	149275	127270	122818
140541	39.0392	154051	139700	167708	115221	164296	122251	128056	155670	146546	129305	123084	138706	94351	102017	103266	56960	67319	56937	101994	51272	34578	148026	93946	57052	115048	141689	149599	124055	121604	66140	99820	98606	85598	97392	64741	96906	106827	169188	113417	127351	55468	153102	109775	126842
142342	39.5394	186025	141608	173131	120320	144245	135468	139793	157936	123315	117048	139353	127443	83667	77840	103439	63261	68903	58151	109613	58949	48682	148246	107336	67458	121396	140637	176161	131502	137688	76141	127883	109475	88235	124240	54948	92721	102803	176265	149460	123176	53399	158988	152224	113753
144144	40.04	163082	169049	134115	128114	154051	119268	144568	139665	147401	125674	166667	143493	122679	74314	93495	69389	94501	58798	105312	51283	55850	161001	97218	76476	121905	147517	170599	116008	128183	72580	147818	107521	101612	116042	61469	105647	117915	182891	165580	124980	49873	152154	157555	121939
145946	40.5406	133468	154027	137353	147656	152455	124148	165904	155022	129744	129062	134219	132277	100259	106052	84754	82003	102260	52624	122656	92906	45133	153565	103150	79320	121014	147170	162758	129687	128669	79228	138185	117395	101358	121697	65388	104110	96374	187274	152917	144245	53977	162585	155855	117673
147748	41.0411	173490	150339	144291	124818	152108	119985	157242	140267	131467	136278	152490	154444	115291	79401	97218	76904	129131	60209	113915	112400	45537	135734	96525	81702	126056	125801	165649	129259	124067	76684	136289	110481	119060	104815	67620	99392	128576	182776	167939	134277	45896	166493	148939	126796
149550	41.5417	152836	150385	181029	126403	144048	134763	154294	142244	136405	122032	146465	132589	118147	68336	130982	80927	122772	52567	147332	92351	41121	144881	97299	87876	130635	136139	163972	119280	137318	81575	120899	123396	114019	126981	67469	100375	119604	198827	171581	122552	54821	145470	134416	112920
151352	42.0422	159312	139480	125743	124818	143909	125281	128773	172935	144777	128507	148119	131525	119927	63134	92825	74811	118424	58532	142892	103254	56798	146418	102236	81089	129409	123778	123373	121373	138914	75297	136497	92848	113707	121095	60012	110897	122425	149159	157797	114851	50312	152304	131074	110874
153153	42.5425	148222	153357	161498	135491	199151	120714	141666	153669	136208	118413	140937	139492	111741	102144	103115	76938	111440	63689	144268	85252	49526	192548	103878	78765	132230	131698	142487	120899	134150	75725	144465	122749	105023	123211	68602	92004	97114	184996	165591	130253	49376	161208	156225	102676
154955	43.0431	163116	157369	133248	128068	151657	124032	150524	123361	140972	125720	152513	125131	115187	95033	122402	71273	78499	51156	126842	75019	47457	149321	96767	96027	128345	149298	169639	141967	148003	60972	105185	119765	147841	125744	79066	91923	132335	166933	157196	131363	41630	142961	146708	126715
156757	43.5436	185516	145991	141041	159682	183793	120378	146928	149471	131872	117326	147633	135827	129351	77042	106873	60359	109914	55133	107879	83228	40901	140105	108214	84812	119257	154802	148315	135803	148847	64856	135075	118979	132797	119615	70822	78199	112388	187483	140278	153299	50994	166042	152328	117071
158559	44.0442	145528	123847	131120	112365	129085	123419	138521	146083	131305	102895	132126	135052	109532	124842	128495	64764	122853	55492	121882	58764	39699	133734	102780	67192	118008	143123	144985	134370	141180	64440	112955	107844	139458	120818	90443	97762	116586	146627	97970	123165	50197	142857	131248	94547
160361	44.5447	136694	143192	153565	122980	140024	104514	132277	126484	127559	109139	122887	116516	111695	85841	98525	80789	120494	54104	125489	65018	60983	143886	89275	72418	112585	151310	139943	141296	140579	72915	100410	96051	117129	118760	78407	100109	101219	168240	75297	114909	39237	136324	148778	93900
162163	45.0453	119708	122679	130658	108353	126229	105520	122598	128438	119430	114111	109567	115580	87610	79239	111660	74476	103323	54925	116192	53376	37711	137041	84511	81401	129432	138463	137145	131514	117534	71088	73447	105081	106457	113453	74164	93160	96571	167638	157277	110851	45341	141180	139654	80580
163964	45.5456	136359	106815	109174	101392	138741	103104	120980	132901	113302	94987	113972	121442	78256	69886	100271	66648	97716	56047	88096	51780	32115	120922	84743	77343	112388	129848	138914	117337	120910	58128	109486	104214	101092	112770	65492	92015	98606	151611	141920	96698	50439	122749	113649	85841
165766	46.0461	131525	109209	138891	125825	115938	102421	116886	131479	106041	101681	132797	109301	68360	53711	108839	58324	95149	44081	83182	51006	37306	90894	72545	61238	107567	128484	134994	114782	117418	58868	94073	95553	108885	99126	58151	72591	91738	147853	139388	122610	39780	123315	117754	87668
167568	46.5467	123824	94524	139064	114932	105127	98883	95877	106422	103555	96316	91946	97577	49387	45618	92062	43295	90720	45919	67180	52648	42196	80846	79898	56659	99450	122575	101069	104468	113568	61180	90755	109162	73065	92096	55850	91576	83066	136671	117973	92975	33410	113140	114504	89079
169370	47.0472	103948	82141	106445	85922	89622	86211	83864	90651	102017	87148	87102	72892	49630	32947	69516	44081	77320	36589	48636	42763	25687	64267	54671	43873	91194	105798	88489	90327	96606	53769	79551	99739	75528	82453	56902	78719	55411	116169	109567	86385	21595	83876	87853	63608
171172	47.5478	70059	71377	91171	60128	93403	81725	89784	77216	93715	67319	82627	63515	33791	37757	45757	24647	54185	38716	45665	32924	28589	53249	59723	35595	64799	82881	85332	74499	77806	67608	73146	60313	68452	76846	45237	65504	52451	97103	99184	76649	27999	104283	74406	68290
172974	48.0483	64348	58255	64856	54162	61030	61134	50347	61411	61850	48728	55526	54809	46185	40462	43480	30381	44289	26323	49006	19005	19306	69030	49549	33803	53515	103809	62914	70834	58347	49387	76823	67146	63654	69377	42659	54324	69458	87992	88396	72464	21803	89506	82315	43375
174775	48.5486	50601	45110	61342	50058	48705	48370	48601	53237	48347	49468	42936	48150	42416	33237	40716	27884	43861	19919	44219	14462	17976	55885	39341	22601	56359	71793	60752	58440	59596	30913	46728	37468	51919	44601	32289	38138	57318	67076	57954	51607	18716	69759	66787	34023
176577	49.0492	44994	39826	43098	37225	35641	45225	42173	43283	33630	40404	38196	38589	40115	20150	29121	21606	31294	16913	34023	15398	15052	55850	39503	22138	45630	53919	57665	51272	51515	31606	40531	40994	40023	40462	31086	29572	49341	59076	47006	44555	23202	57284	57896	39109
178379	49.5497	36000	35953	36127	29179	36312	38855	33491	34763	30994	30439	36739	31468	32069	23606	30115	18728	30104	14242	30231	17121	14370	40867	33734	20057	43052	53468	43734	40497	40763	27919	35872	30231	34462	28312	20277	36474	39780	51318	36369	44428	12844	46185	50902	29225
180181	50.0503	31953	29757	34520	28635	31075	31375	30936	31687	30427	26369	28450	29364	29028	14531	23156	17167	25502	13479	26335	14901	10994	35086	34150	19202	38335	40566	39456	36312	36739	19306	38948	27491	38450	33075	21445	28023	33260	45329	33965	29965	11144	44890	42647	28450
181983	50.5508	30254	26982	29583	28208	32450	26867	28404	34104	25722	25768	27595	27572	25121	11907	19722	17121	21699	13676	25953	14104	10150	30150	27248	16566	35572	31352	38485	31236	32647	19826	29849	30554	26589	27942	19306	19445	31190	41792	34832	28994	12427	43364	32369	28462
183784	51.0511	26254	24439	32924	27098	27895	24601	25121	24982	24843	27884	23907	25664	19988	11479	15641	14046	21086	12266	24612	13110	10913	29317	22254	14774	30323	28462	30763	26797	30092	13237	28728	31653	22763	23144	15965	20069	25052	38589	30843	25456	8763	31965	34982	30890
185586	51.5517	22508	21734	27028	22300	27526	22242	22797	23479	21121	23942	23630	23768	18774	10300	15965	11560	16982	9237	18161	10959	8277	25907	17387	13815	28670	32289	28971	23803	26057	14427	26242	26508	25699	20173	13121	16809	20647	39468	28393	19976	11768	32023	33040	20739
187388	52.0522	24855	21260	24901	20069	30046	20104	27028	24578	22127	19745	21722	22601	16173	9156	14150	9560	17017	10612	18647	10219	6624	21630	15896	12612	22474	24924	26462	20531	23156	13110	25653	24578	20196	19098	14740	13826	21861	34023	21953	18832	7919	34161	26127	21606
189190	52.5528	20774	19722	29907	20335	22647	21225	25745	18936	24069	17560	19791	21711	17121	9653	11375	11075	14011	8959	17607	10034	7491	23028	17872	12936	23075	23260	22080	22069	19722	10520	24219	23410	17549	16462	12173	12497	18682	32855	22161	20427	8786	28138	23491	21930
190992	53.0533	20497	18659	20265	24462	22034	19687	19549	21942	21237	19953	26797	18647	14231	10219	9191	8312	12474	8705	19202	11237	7410	20023	13953	9919	22138	20485	24739	22393	20219	12370	19618	21410	18809	16959	10358	12462	18231	26369	19202	18416	6844	28150	21341	19375
192793	53.5536	21156	16578	22520	18843	25225	20393	21433	18890	20774	18635	21572	18497	14416	7815	8994	8266	12693	8878	17422	10497	6127	19942	15156	9595	21364	20242	21780	21109	18994	9734	18578	19734	16462	15341	11017	11734	15745	23734	18161	17052	7873	26543	18959	17514
194595	54.0542	20173	18138	18624	19063	26855	21445	22080	19687	19352	18034	21965	19618	13086	8589	9214	8081	13271	8185	17838	12497	7641	18982	13526	8890	17248	18728	19768	20658	17803	9063	22508	19676	12069	13271	12150	11537	17121	24173	17791	19213	6925	23560	17329	21283
196397	54.5547	19930	20346	22289	17075	26589	20404	20936	21329	20797	17468	20994	18439	14370	8763	9052	7480	12254	7537	15294	11653	5676	18000	12682	8936	17930	19479	19606	21433	17838	9919	22335	16046	15965	15329	12335	10508	16809	24832	17607	19826	7665	21803	19052	22358
198199	55.0553	23052	18196	20369	17815	21618	18971	21514	18289	22381	19803	24046	20300	12543	6636	10289	8335	13965	7930	16427	13583	6867	18370	12127	10901	21144	22300	23433	20855	18820	9075	20578	19872	15329	14335	11329	14855	17248	30312	16913	18774	7722	23109	20265	22913
200000	55.5556	28242	24774	24705	21028	23260	21445	21630	23144	23410	22508	24936	20242	12763	7665	10370	8566	14959	8185	16277	14358	7202	17907	14820	10763	17595	23005	23572	18936	20046	9445	18948	19930	18346	13433	11988	14162	17109	26797	18450	20867	9075	23965	21132	19109
201802	56.0561	26890	20554	28924	21745	25803	29306	22184	22612	24150	21491	24404	23283	16450	9665	11884	10624	14393	9410	19387	16312	7329	19630	13098	11919	21988	21306	25618	23583	21803	8971	20913	23907	17757	15479	11052	13849	18890	25965	18924	19433	9607	27260	20670	21433
203604	56.5567	27410	28531	22231	22832	24450	24589	25687	25722	25329	24832	24184	23352	15711	11491	14254	9711	15549	11757	17098	15676	8277	25352	17422	13410	26127	21456	24890	26346	21780	11618	21306	24265	16543	15052	12982	15306	20994	27999	20485	20462	10416	29213	23630	23213
205406	57.0572	31572	21514	23872	28936	26624	25849	24393	28242	30080	20728	24820	24150	19040	11006	20867	11537	18843	11341	22589	16161	7988	26670	17780	15167	27098	19630	28138	25676	25595	13595	23202	27976	19572	15977	16774	17237	23098	29005	23167	24127	11676	28080	23109	22693
207208	57.5578	40266	28485	28913	24913	31630	28462	27514	26404	30947	22531	30485	27757	19884	13017	20474	15711	17283	13896	24346	21329	11792	35098	21364	18161	25075	21884	29017	28635	25965	14370	24762	25884	24358	25271	17294	22104	24797	34554	23861	25271	13318	31572	26393	28450
209009	58.0581	32901	24184	36150	23075	25676	26265	31375	31664	31560	28693	33583	24601	20393	13849	29017	17988	22335	16635	27121	22601	10925	41734	26138	19618	29710	27861	32508	34023	29421	18358	29710	28901	27456	26138	17988	19699	28508	34543	26219	26739	14774	37560	29017	39815
210811	58.5586	40531	24242	37526	29421	25722	29341	25144	36046	33329	28300	27479	31144	22000	16011	28265	18081	19375	16450	29410	28138	12370	34000	28427	21121	32601	32069	37248	39514	34658	20312	28739	34092	28277	26751	23572	22104	28335	37167	26751	30219	15607	41040	39029	32138
212613	59.0592	30566	26658	36462	27086	21976	30104	24890	45711	30947	27803	33699	23167	28450	15630	27653	24023	21907	20369	36173	27479	21075	40878	30936	19237	35815	37768	44266	35063	35699	22612	31895	34832	28046	26716	26080	34092	31075	37306	26265	35687	14635	37537	40451	32092
214415	59.5597	26867	18774	31780	21699	15433	27953	30497	34277	31710	32115	20346	26289	31572	24115	27375	25895	23329	19676	31872	39364	20693	44555	30219	20242	42208	49248	41283	34358	38763	24184	35317	44428	28554	29398	24335	34265	31849	48751	34092	37017	17167	37653	39398	36693
216217	60.0603	25630	19422	54867	28867	23572	35919	29583	40011	41618	36913	27780	31341	34000	25202	39699	28971	28173	21734	38011	39641	24323	54948	37572	31734	42994	45769	34543	43907	33780	25341	40832	44878	27942	34843	26901	34901	34104	38728	36369	38774	19271	40809	53538	34566
218019	60.5608	25341	21421	62590	43849	27514	40740	31352	36739	55619	49040	34023	48555	37248	30485	41757	31664	26658	28566	41109	52058	30127	52925	51503	35930	54416	53954	52509	55018	41225	29641	48485	56278	37156	44046	32716	37572	43965	50740	46601	52185	27086	73493	52393	48786
219820	61.0611	37965	35260	71805	58105	61307	60833	41029	61654	61874	72487	70603	68406	32416	26023	46011	33653	22601	25734	49156	58440	26450	68787	55469	38254	55850	71285	63631	70498	55318	29468	63122	50925	38335	55145	33156	47063	48647	58972	45815	66857	26057	76487	62660	53179
221622	61.5617	44000	64729	79124	64544	84280	73354	62648	87356	61006	69030	66302	64960	37306	57839	68325	39225	43537	32520	61191	52971	39826	83367	56243	40520	67284	71412	92281	70649	59053	32300	55758	54035	35248	49387	32485	40404	52717	63781	37398	79320	30231	84246	73158	52278
223424	62.0622	74256	63515	93842	78985	79262	72846	64868	92038	85980	67458	102479	56428	35976	33063	58498	31965	36971	28312	52960	58324	35861	84477	68556	51954	64463	73678	72418	86350	58486	36000	54474	50590	53399	65434	35167	55075	74360	76094	58232	83991	30774	91264	82072	56763
225226	62.5628	119846	70776	95947	66232	83448	75898	85390	77193	97068	69816	102734	81089	39445	34277	62174	38254	33734	38265	50358	64510	39144	114666	62359	53202	90293	80546	82662	93206	79413	36612	72545	57180	67203	70580	36786	54162	67492	104306	53376	88003	42971	108584	72880	65122
227028	63.0633	123292	112967	89356	88732	93842	82014	82419	95946	99010	78823	86824	93264	59284	37271	63515	40104	38069	40624	51619	61538	40046	113730	75898	60821	78823	82823	98190	85263	69550	53272	70001	73146	66186	59966	39664	52012	62186	114250	58706	95461	33075	98086	80499	72487
228830	63.5639	92524	88928	86870	85760	134219	68464	104040	97611	100595	85147	75389	80141	56694	66672	75909	51283	33468	42208	55769	57515	59642	116794	56289	61030	87333	80372	97172	89576	86095	47931	56729	97669	74557	68880	49884	55399	78164	105879	49214	91495	35294	83448	93461	86257
230631	64.0642	133213	89541	103855	78395	106977	85367	99496	101577	107590	96663	104780	97184	49549	57492	85101	52809	24057	47803	55260	74383	57052	105428	56116	88420	92143	87795	96397	106711	70764	57376	88061	80927	70464	78118	62059	68533	77863	101346	41040	89992	42347	109706	90269	76303
232433	64.5647	99207	91218	90558	85228	131109	74580	112030	102722	98814	90986	94952	104387	61573	52821	75863	59018	39040	44948	49769	92975	48705	123523	80164	83344	97334	97750	118482	89136	92374	43468	84766	78407	76996	75435	46416	66949	85598	122425	53723	84431	49908	103716	83852	68730
234235	65.0653	115799	105983	99716	86593	130288	64498	97785	104121	98999	95946	101809	89529	53041	47352	92859	60209	49433	49179	58000	100572	51896	122009	62613	89275	92698	105347	98155	90836	85067	42335	85957	75123	68117	72476	54890	62741	79216	104110	60694	84604	41456	102317	80742	83610
236037	65.5658	127732	106295	124506	83772	104653	81043	116146	111648	94964	92038	118979	84777	56509	41618	111105	53422	55538	40948	43930	96802	46312	114978	51399	67608	96952	101959	74279	123107	99288	42474	91368	92119	92790	93623	56567	58833	89113	122610	70129	93310	48393	89842	82430	82095
237839	66.0664	129293	101196	110284	88408	132647	81529	106804	108850	101126	99970	117962	78939	66024	45769	108365	42693	52162	35676	39341	107093	75077	125847	57873	81991	92143	97762	88998	100398	90940	52624	94374	86662	69354	67805	46324	57145	84708	107786	67053	88674	33630	105023	86674	75967
239641	66.5669	114146	91946	103693	96351	124437	80973	102572	100063	116008	85749	102641	93391	65504	38416	91564	38508	49306	51156	39341	74545	54312	109983	54729	76765	86327	108781	100340	92674	96293	54844	87749	99739	66475	71689	53133	57399	76210	119685	63064	90836	31236	113186	83240	71782
241442	67.0672	101913	123096	86489	79864	113233	84870	97114	100444	104757	97322	96409	103728	51780	37919	111648	67446	51249	57341	31560	81898	54416	131814	36023	62833	90697	100826	94998	97646	85818	52266	89587	83506	103416	79644	65793	54336	77285	114192	64290	92559	33445	106908	75909	84269
243244	67.5678	110122	85043	107382	85298	121199	60671	83020	93091	84986	87229	88130	87807	51804	40786	73759	61746	43711	46878	35375	65076	71423	119210	54382	51769	80869	105486	96848	82014	82245	46231	83563	77378	74869	63931	65226	62613	54220	110261	55596	85356	29398	101843	97496	81158
245046	68.0683	100097	96212	110631	82465	118632	77863	94883	88339	86119	88246	96975	79598	47942	37826	100525	60775	31930	52867	36242	86072	64914	119789	57295	43942	84569	126761	101531	92813	72129	54255	61504	91877	63851	83899	44196	61214	46959	116551	58902	88894	33942	99623	91229	60174
246848	68.5689	97415	80037	85656	80338	123963	78650	80418	88130	82904	80129	78303	78152	38774	38474	81898	58232	41387	48081	39422	80338	62787	102757	49595	71181	88003	97288	71169	99739	81205	47353	61515	98167	51919	70024	42636	60266	70429	105659	68984	87599	54786	105786	86038	72823
248650	69.0694	84766	90362	87194	98005	110388	75378	93993	95426	79147	76222	88408	95357	48358	49110	101913	72337	53330	41156	29063	69735	33791	103370	35156	64070	84812	108295	52902	94177	82939	50752	73007	84731	79633	70672	50960	57376	74245	104040	53353	84569	27306	106642	86916	54960
250452	69.57	103370	72314	85390	82257	90535	79656	75678	76094	78580	72314	73042	78592	52174	37306	85379	59931	54786	32832	27248	52439	33919	131120	24913	58035	71192	103797	107058	79875	79205	39225	76707	96825	79366	66637	41595	56960	70024	104988	44196	80719	37387	81575	74707	57920
252253	70.0703	99253	65053	71712	81922	93322	67677	71840	84269	70279	75458	75250	80187	45422	26693	63319	44728	41803	57249	26670	65920	46173	111926	39942	53214	80130	110978	92709	75886	83980	47133	71111	75967	54971	59191	56532	60428	60787	96513	59862	89437	31271	87101	89784	69146
254055	70.5708	100282	82985	76060	84014	83008	75216	70429	66174	83193	70637	60798	70001	38971	40566	54335	35132	38242	42890	30115	76742	45676	65643	37722	52358	64533	79794	75065	86882	62348	46902	65469	80950	59642	60752	36728	44982	55966	80141	56047	73065	25433	79783	74603	55110
255857	71.0714	80199	71435	71551	43167	90790	68799	60093	56058	55688	60486	71285	60833	28543	16890	41618	24982	29040	36647	22878	46208	31329	58370	26485	25768	52601	64232	61943	67493	50578	44913	68036	58047	54393	48624	38589	45156	52046	86153	43214	71007	23838	60810	60382	43977
257659	71.5719	69897	60833	79101	67423	83066	52775	59943	59480	64799	53989	81216	52370	24832	29294	47942	45329	29236	28265	16682	49538	26393	64914	31005	22855	47341	68152	38057	54902	59399	25780	65273	45745	62533	45271	32913	43341	55249	59688	47329	46428	27722	60775	51202	45456
259461	72.0725	81216	54671	71146	62359	75274	64718	51757	48855	55758	69828	65076	55758	28647	24739	38150	25271	30161	19248	15387	46890	19537	61966	36081	34184	49619	66348	56047	68348	52937	36127	53330	49584	48474	57307	48035	35965	48717	65273	43190	61295	20867	64949	64024	40994
261099	72.5275	63273	47006	62452	50451	60186	49480	53711	54416	48971	53156	47017	56312	16832	21537	40901	27156	37734	26011	11803	30751	21433	60301	39676	35872	49931	58648	70984	51145	51364	41040	49896	45514	39942	39861	33838	35421	49295	60741	36312	49075	28358	61839	57885	31352
262900	73.0278	54370	48139	52798	41017	56810	51630	47468	45202	42347	43734	40057	46566	11699	19838	46115	20554	27086	25595	15930	34161	25132	53711	32890	33283	55700	68579	63226	50150	43029	27017	48324	54532	49873	35826	40381	33965	43792	75632	30104	37098	19479	59642	54705	35815
264702	73.5283	41988	38948	49769	45757	61006	39029	41734	46081	44162	48069	41098	42890	27606	17491	42196	28682	22138	23618	15410	35861	16971	49803	29710	34080	45260	61827	72984	47387	49225	28092	45572	51572	60648	44508	33502	36635	45167	56509	29838	44728	19988	57723	46347	36254
266504	74.0289	45480	38289	51468	42300	52150	39040	39711	56555	35410	41479	48682	44520	27387	16901	37133	30508	20589	21167	15190	25433	17098	47769	20427	35988	42335	63377	69816	41526	43422	26150	37237	57249	43873	37526	26312	27803	41248	53596	33398	40751	17699	63041	47064	28728
268306	74.5294	48532	41248	50555	45653	53769	42323	40508	45722	42844	39861	38115	39468	32578	16335	28635	28219	22901	19121	15086	21144	17422	52370	12092	25410	39803	47642	49341	34820	38161	31803	32971	51214	47873	34265	30427	24693	36682	55284	23999	41271	28682	53630	46185	28069
270108	75.03	41826	39942	42636	37907	52000	37317	36369	39526	36739	46104	41144	37745	30127	25283	36335	25780	25248	14728	13872	15260	19687	39560	15179	22994	37861	44185	52890	43445	33236	23132	40289	36878	41526	31583	26647	26034	36034	48358	21653	35248	14312	53307	37884	29028
271910	75.5306	43491	31502	35063	32624	48301	46532	34138	35953	33468	39583	32393	36185	24242	16046	27364	21121	22184	15237	13248	22358	18601	37537	22092	19445	35595	37618	43630	34034	34150	15699	29780	33410	31734	30450	21687	21398	29745	42647	30196	31572	15607	46728	42520	30034
273711	76.0308	36786	30601	29630	31999	40300	41237	37364	32520	33410	34554	31942	32312	25213	15930	24843	22254	20219	14508	15815	19306	19144	39202	16393	16011	35317	34196	41352	30277	27745	18531	25167	32843	29017	27017	20890	19549	31156	43040	18508	31317	13514	42092	34901	28982
275513	76.5314	33687	27549	28843	25028	48347	31999	34924	28473	31456	32450	37040	31525	18971	13803	23549	18924	20046	12948	12566	23421	13988	29213	15595	20982	24208	32416	31676	28184	26011	15595	15572	29999	20739	22959	20416	16323	23641	38185	18566	38416	11537	42728	28705	35109
277315	77.0319	33260	28462	28104	25109	42508	29040	31491	28867	27225	29179	29722	29098	18312	14589	20404	18081	21502	12971	11526	21757	13618	31433	14300	20658	17676	32462	32069	27965	26208	15641	34196	26381	32473	22023	19734	19838	26589	33271	24797	28531	10786	35815	32057	20890
279117	77.5325	38231	28358	24924	28994	42393	28693	28323	27572	27341	27653	31942	30936	19248	12485	21826	11896	17838	10959	9283	16635	16011	30057	13560	15953	24289	29560	23653	29364	24982	14346	21421	34924	22023	20705	19699	16520	20797	33063	18566	22589	10717	31965	29352	20682
280919	78.0331	36115	25618	28208	27213	42034	24728	25560	29445	27537	31121	30843	31271	16138	10497	20554	14647	19549	11167	6821	13988	13225	27757	12832	14081	24913	26601	31271	27352	22416	14890	21017	28057	21618	22751	20439	12520	19005	36034	16844	22335	12092	44659	27606	21664
282720	78.5333	29329	25595	31456	24323	31699	25190	32751	26936	26254	24323	26774	31063	16890	11514	18566	14901	15063	11399	9514	11711	10971	27317	15815	13988	22184	24913	26578	23213	19919	14578	24173	27456	23999	23930	20635	11711	21225	39479	14774	22000	15052	32762	24416	21364
284522	79.0339	31410	32173	24589	27999	42705	33745	32786	28716	27132	30208	28312	21306	15167	12231	18936	12404	16138	9699	10832	14578	10589	27421	13040	12624	24612	24231	28577	26254	20843	12323	24670	24867	26416	21988	15318	14531	16994	28277	14497	19456	10277	29283	22867	20092
286324	79.5344	27791	24127	29606	23664	27884	23526	26462	31306	26624	33352	23768	28786	12612	9283	21098	9560	15630	9387	9653	17017	14046	27826	13653	14000	25086	27121	28335	21526	18739	11399	22369	23479	25271	25618	13884	12670	18739	33653	20127	20023	16300	33988	28751	24104
288126	80.035	35341	28624	28231	27479	28578	32057	30393	31248	31479	25919	24635	26092	14358	9665	16890	13214	14659	11422	12531	13133	13607	30173	15930	13468	22335	26115	28219	24763	19479	12185	25387	27919	24404	20474	14266	14844	20670	35294	17422	19271	11110	33942	30890	20913
289928	80.5356	38682	27375	30462	26601	32277	35583	28786	32751	32924	29028	31051	26219	13583	11260	19271	14046	15433	14624	15953	12358	12127	28173	15722	13803	23179	27479	31895	30416	20231	13872	21375	26115	22878	21387	12786	20358	20774	29260	20254	18508	10416	31040	22994	26635
291729	81.0358	34011	33884	27976	22924	27710	28138	26104	26069	31086	25329	36185	25953	13768	12959	19884	10589	23341	13387	12670	16208	11953	32578	19156	14011	28635	28890	30728	29988	23757	14312	27364	24682	26520	18057	16635	18254	23630	35040	22358	20855	13780	32277	27410	24901
293531	81.5364	35965	32820	27965	27849	36739	25364	28462	29630	29109	27109	29410	26497	13688	9584	27213	12913	21861	13225	13907	13884	13052	29826	20346	15109	22312	28277	31641	31745	22289	17213	25213	25872	26924	25398	14994	14555	24208	32867	24947	26046	12797	29236	26046	26011
295333	82.0369	32739	31734	29017	26716	32809	24150	31063	35653	27965	27583	26450	26809	15017	12347	27271	15387	22069	12150	15676	15005	14820	32855	24427	17352	33341	28184	30404	24867	23144	18381	27468	29549	29595	22820	15017	16069	24543	31132	23167	24520	22624	27722	26508	21098
297135	82.5375	30138	24635	32265	27283	24982	24473	31329	32855	27387	28115	27063	23687	15144	18936	21017	15086	20554	15977	14439	18647	14624	37329	23225	17653	26335	32150	32196	27364	22208	22289	33190	33144	30369	21907	18474	22335	24265	33687	23653	22913	16555	33745	31710	23491
298937	83.0381	34867	34601	27988	28820	23549	24890	28104	34046	25514	26184	28936	32323	15237	16219	25953	15479	18150	15664	15341	23456	17144	36843	31537	23838	33225	33387	36855	32832	24843	17930	29745	36427	28797	19988	18844	17711	22300	32971	26635	28104	17318	29791	29109	28462
300738	83.5383	28080	26335	31618	22335	28520	19352	18485	30878	31271	30023	25872	25491	15630	11040	21942	21768	18370	16878	14531	21167	15641	30497	28497	19433	23491	31202	42740	27676	19352	20393	28092	29595	30936	21063	17237	23005	25514	32485	27583	24959	19156	30289	33560	31248
302540	84.0389	29445	23445	33502	27710	22809	17075	26531	28404	29514	27630	33630	28462	16878	11271	20046	22670	17144	18416	18370	25040	12520	31942	27976	21167	35063	35121	44855	26393	22763	25861	28670	29121	30034	21121	23872	23121	30196	32832	25895	27063	20196	36520	29734	26797
304342	84.5394	23063	17572	25930	30635	16404	24427	26346	27028	19144	23815	26208	21190	19179	18901	20786	31907	20150	19549	16023	27248	16023	30728	43179	26034	37907	32150	48775	29225	24242	21919	27040	29387	36393	24115	31202	23803	27572	36046	31364	27919	18589	39502	37722	24265
306144	85.04	30115	21225	32000	30809	18381	25456	23109	27780	32786	25364	27398	19676	18774	14451	25213	23549	21641	25306	19653	30497	22924	26427	39318	28566	38890	39329	47468	33745	20439	21121	33040	23341	31456	18543	19433	28439	26497	44798	30208	30196	26497	30890	32716	33202
307946	85.5406	29179	29144	37803	28138	25734	29005	29352	32901	34104	40913	36161	18531	18381	13699	24901	26381	22554	24959	20219	29780	23236	42173	42439	30531	36659	43063	48023	38150	24312	20890	34254	31745	25630	26439	21676	23907	32184	39896	27664	32612	20982	47607	39838	30843
309748	86.0411	38774	25583	48994	27549	37676	25398	35549	40508	39687	37109	32127	29190	17942	16185	27445	23156	26843	25745	26820	34358	25514	43757	40023	30739	36104	45052	49480	41271	31687	27734	27965	31919	21884	25583	24404	19907	26647	49468	45803	36809	22797	40346	25040	38844
311549	86.5414	53734	31780	60082	33710	38485	34092	33838	40682	44832	48786	49445	33005	20497	18242	39098	21630	25676	26023	22820	26601	26554	49017	57677	32335	42531	43676	46971	43237	33306	32647	37306	30867	44358	26393	30358	18924	44104	44335	33410	32855	29549	46497	22138	37699
313351	87.0419	53584	46844	48196	45052	47191	38092	46196	49965	47480	48520	50058	32023	25028	17225	40971	21283	33722	27329	22682	30462	29132	56971	41410	40196	42612	48208	51376	37745	39896	23572	38647	31676	37375	33711	27236	23086	33248	42266	30739	27260	24762	43815	31329	38832
315153	87.5425	54590	50613	52000	39861	62232	38138	37306	56717	49746	39977	61353	53538	23156	17213	44069	40046	29179	27583	20913	32693	33791	67146	35075	36000	53018	64417	58197	47618	36936	25132	39942	51804	31213	31641	38485	48000	28832	50382	41953	29040	39029	50879	41306	39237
316955	88.0431	56509	46058	47098	46740	55341	35583	46162	48636	45688	41329	44705	54544	24971	16693	45919	38115	30300	32647	22439	36150	30809	55284	43063	35803	50358	52058	65643	45630	35063	30335	43653	39838	36936	28312	29213	34693	33456	49815	56463	35260	23999	63423	36797	37167
318757	88.5436	58763	44717	43445	39526	64405	38381	45110	47746	48497	51249	44277	51584	25445	16948	41919	33387	32057	31919	21121	40867	35583	43526	39815	33722	44797	47988	53561	52729	44231	27895	42081	43514	44589	35734	30878	33895	36289	54289	49676	37167	23445	50578	41919	34254
320559	89.0442	45329	50462	44347	44855	44416	48532	47283	46613	47029	37237	44381	39595	34508	21514	46867	32242	33861	31815	20948	45514	32231	46347	44127	37213	39745	56370	55584	41526	36381	31641	35641	35757	30947	28450	26439	29017	30635	58116	44046	35780	23271	47965	40485	38543
322360	89.5444	50994	46219	44728	44046	50486	43352	46185	51746	46878	39075	41237	49595	24913	18404	48647	41641	32046	27549	34450	33063	35179	54197	47572	47907	37849	63573	53307	43861	36369	27884	33063	45237	29468	33687	33005	38693	27630	51491	35560	26971	30728	41965	59712	39491
324162	90.045	47722	46439	62394	37294	50220	33248	46659	48590	47318	41514	39872	49618	36184	15375	39526	44728	32705	26635	26843	34890	33630	51364	43549	43988	48462	64533	54590	47734	35919	24069	46416	52994	32011	31421	27387	31872	33572	51387	51746	22208	25225	49723	51468	40878
325964	90.5456	48809	48809	44809	35710	45745	39861	44115	50289	43653	44266	37075	48347	33999	14404	41503	40844	35433	31144	23398	28242	31329	50220	39595	39398	44925	57526	41225	51075	35167	33699	45491	46925	48694	37896	24023	25306	35815	55734	46335	43179	25572	55284	43156	40832
327766	91.0461	46266	46277	39919	26080	53168	38127	46520	47792	47214	44578	36994	47711	28601	38161	44115	38705	35618	46705	28427	41618	32034	44763	31710	35005	38670	47734	61249	48000	34647	25583	39641	49954	43676	46381	23213	36404	31965	59538	35526	39792	20982	38439	44219	44913
329568	91.5467	42925	49329	58683	47283	60440	45780	40716	55075	43341	39838	41341	50092	26358	23005	43514	31051	32867	37352	29676	52382	34566	34161	41595	39792	39676	59087	76881	45306	37375	25572	38289	51572	33433	43930	30959	42023	23456	49087	39572	46890	26682	36901	45907	53515
331369	92.0469	53977	42231	51399	40104	44254	41063	46266	68568	44497	41514	39433	46902	29630	20346	40878	25028	32901	32809	26809	39341	25005	37838	40913	44821	41676	73713	77389	49699	41190	33109	41445	58209	27109	38161	29213	27745	39491	62035	55075	44682	39583	49665	37456	42393
333171	92.5475	44821	40901	46139	36554	49861	42474	41653	45214	42751	36300	36289	41780	34554	15976	52497	23248	29294	25236	24381	45352	22913	66186	45052	43190	51202	67238	61504	55700	44300	31872	41884	44982	41641	33341	31849	28589	40601	62509	46393	44659	21028	41630	43283	31225
334973	93.0481	50636	39757	41202	40173	67816	36173	43306	43792	43572	47341	38161	47306	35283	24959	46636	46485	27283	30219	20300	53041	21132	72973	37352	45456	47376	56763	62567	53272	41780	25780	43387	41214	39711	33699	35387	38682	37849	58417	36601	38635	23537	51121	55041	39121
336775	93.5486	54971	41699	41399	36705	46393	39849	40023	52000	42289	37630	37664	47653	34612	24959	50867	44763	24554	34323	17248	32739	17884	51260	24196	38936	43884	60613	67862	41641	37664	34000	40520	56428	38312	35884	30265	31757	33179	51503	28046	38497	22242	40705	45029	37456
338577	94.0492	45040	39907	43260	39618	56451	40948	42150	59284	45595	47075	33329	45676	31317	16774	38705	42427	20924	36878	25352	28682	23514	43873	30497	40566	40370	49410	54775	48613	40959	28127	34809	47156	35052	32300	26497	30531	29317	61018	35387	30855	16104	40185	38416	34543
340379	94.5497	50902	46670	50578	40312	62983	36543	42508	51538	39907	34867	46913	42878	27895	10312	37583	37884	27051	38196	29063	38254	22115	39202	33387	41156	50405	52543	56428	49237	33375	29722	40578	46751	44011	30554	25028	24023	27583	40890	42855	23907	18739	39179	46150	27260
342180	95.05	51630	44277	52069	33317	47410	41988	38265	52890	36000	32971	37976	41630	20069	12971	29028	36184	27653	40323	25838	41653	18416	41584	32693	41456	39699	53850	55630	40670	33491	21745	34763	49491	33248	29537	25202	33803	28878	39919	38439	35664	20867	38809	37387	26265
343982	95.5506	43052	35942	40254	40994	56243	40081	41133	52289	44474	34000	42959	42046	15676	15849	36219	36878	28497	28219	16346	39641	22184	29710	34728	34855	39306	47595	43445	35086	36948	28774	35953	41260	34982	34219	27271	29329	23537	42555	29456	40346	19028	41063	32254	28196
345784	96.0511	44323	38080	45560	36219	48682	31375	38682	42104	40925	38635	30462	41468	18381	26578	32635	28867	25919	23121	24046	38231	16427	35953	29780	34127	41977	52278	48162	31768	33398	25768	42716	26936	31479	33641	19329	34115	31410	49410	26612	41468	19445	43641	39133	37121
347586	96.5517	51827	32369	35630	36728	55873	35618	42104	41653	35213	36716	35502	38104	24242	23838	31872	24924	26300	23618	19988	38393	24219	30427	27132	39225	37572	46474	50948	34936	33942	32959	38092	18242	30161	30855	25768	27121	28947	50208	37398	35445	17618	43537	51191	34439
349388	97.0522	40011	39976	45329	31745	56694	31826	38046	40901	33895	30450	40578	36647	23236	11445	36924	18635	24080	24104	18104	28971	22728	34832	28231	30427	34312	41190	45341	36080	36682	24531	27676	40289	24786	24127	23364	26867	30023	46613	29710	36381	15572	42971	31815	35422
351190	97.5528	45248	30624	42138	44289	57677	31606	32809	40150	29121	31398	29121	35121	22057	12231	33028	15468	22416	25445	13653	23999	18924	28080	32890	30890	31294	38601	44058	34520	34924	20820	28820	47387	20670	35595	18843	30716	32566	44243	26797	28080	17225	41248	31479	32092
352991	98.0531	35768	28924	28393	38115	49364	34219	32531	32543	29144	30693	33017	31525	17711	14069	28011	22658	20173	18439	13202	22092	18358	27271	25468	34774	33976	41040	47480	29745	31063	15445	29965	28682	19375	25999	22404	20705	29040	36161	24254	22277	23618	41433	35225	30682
354793	98.5536	44439	32624	35028	29283	40601	25098	33988	29953	26416	33028	28150	32393	19537	9468	30890	25109	19861	22635	12820	24219	20138	33375	16578	32416	28670	33942	38185	36208	26531	19133	30023	34057	34670	24323	20867	30497	23179	36763	21711	28797	14543	49040	36670	31179
356595	99.0542	39341	32057	42046	32658	43838	24601	30855	34763	29919	28242	28069	34554	19734	7965	27572	18566	19953	17618	12451	21144	16728	25132	19768	26277	26196	36219	32473	32219	25132	15341	24936	26462	27710	25803	16150	22508	19491	38011	21294	31156	14531	31317	33225	34589
358397	99.5547	39618	28936	31815	25468	42717	29930	27664	33583	26427	29491	26242	29445	17572	8982	27190	20369	22104	18809	12092	19537	14994	26612	22867	28161	26601	34335	37687	27676	24335	15029	26913	33052	23722	25606	19398	19237	25630	35167	24901	19294	13433	28208	28358	26809
360199	100.055	39144	29768	23109	25653	42427	23919	25653	31352	25768	23479	25942	28011	19687	7480	25121	17791	17410	16774	18231	17607	11595	22947	19052	22485	28682	31167	34855	32023	23791	16716	23722	28508	26508	21121	14543	24589	20601	36982	24011	22416	18578	32543	22115	23410
362000	100.556	35028	25167	29583	24843	43595	21341	24069	28994	24890	24277	25710	33306	15976	9075	25560	15583	15953	19352	14173	25075	12416	25225	17271	26161	27838	31317	30832	24901	18485	16624	29757	27537	27999	19075	15988	23849	22716	35075	21329	17318	14705	30693	28739	34982
363802	101.056	34647	24439	23075	21919	30901	21433	25826	25075	27236	20312	21872	27791	16185	8312	22242	14104	16173	13653	14913	16901	13260	24601	17491	18959	27710	28208	27641	22716	20659	16127	21803	28080	29653	14913	13792	20254	16797	29040	18601	16959	12647	27583	23606	24300
365604	101.557	30231	29687	29364	21294	38404	23098	25606	25999	29849	20843	20069	25063	13803	8335	22867	19653	18797	19063	11688	15896	14185	22335	16185	18739	23757	33260	29734	24913	19283	15271	27687	26601	20138	22011	14716	25699	18728	27225	21421	22254	9954	28450	24127	23364
367406	102.057	24034	24913	25537	20046	25352	16832	20901	25017	21017	25294	15768	16150	13919	5676	21260	14335	13630	15318	15514	14289	10508	22554	19896	15734	24705	34034	28219	19375	16659	12208	22658	27329	16161	27710	15688	25098	22820	29745	21583	21260	10208	31930	20739	22404
369208	102.558	31895	29942	25028	26242	39803	18982	25352	25664	23063	22959	30439	27525	15190	9075	21583	15306	16485	18890	12231	15560	11849	23364	17352	18589	26913	34057	30566	26092	21329	13930	21132	30034	21167	19133	17179	18705	22890	34739	17722	17468	12289	25525	19976	19907
371009	103.058	33248	25815	29734	22080	27930	19167	25525	26046	31306	29352	25664	28323	13953	6982	23052	17005	16994	15976	12809	14451	10763	21583	24820	16474	23017	29942	39583	27838	20161	14948	17283	21445	17976	23734	19144	16254	21768	30959	17965	19699	10196	24901	22763	23976
372811	103.559	33421	34878	25676	21294	42901	22254	27028	24242	22705	29479	24982	27572	14809	5930	23387	13225	19907	15861	11861	18011	9826	20670	20786	18393	25849	30890	29768	28578	20786	14451	22346	28069	17595	19768	15306	19075	21583	33213	20485	22138	12081	26381	25260	23156
374613	104.059	35456	26797	22820	21549	28289	24716	24184	28231	26138	31283	29872	26485	13977	6393	24208	14335	18323	18485	11722	18185	9919	23005	19630	18520	29572	30543	36161	24531	21953	13156	23317	29410	17387	22219	16728	22682	21583	35121	19491	23491	11052	30462	25653	21988
376415	104.56	28520	27028	28393	21132	32057	20265	22369	36728	21942	25895	28080	29595	16138	7075	26797	15098	21791	19630	11965	22774	13549	40346	21005	17086	25722	33965	30300	27017	20878	12000	28323	31872	21063	22728	18774	26809	27757	35803	24739	19953	10936	32161	25884	26462
378217	105.06	36716	27953	28497	21075	26034	21618	27375	28936	27387	24554	26936	28196	14462	6798	23791	13930	17595	17988	17167	19445	13086	29895	19826	18820	29329	30485	34023	33202	20786	14693	22115	32011	30057	20369	14335	30092	23988	29156	20739	27075	13699	30393	24138	30913
380018	105.561	35745	26473	31456	25086	26728	26508	27167	32716	29757	24265	25236	29190	16624	6428	27468	13653	20867	16867	20208	19942	15086	29491	26115	19930	26346	36346	32762	28057	20832	11734	22820	34531	30335	23121	13849	22578	25479	29248	24751	23687	26404	30208	27260	28658
381820	106.061	34184	32682	23456	31156	29861	23653	28612	31907	23109	24947	22450	27988	11815	6011	23595	14404	18739	20092	20786	23549	16647	28705	28508	22809	28312	32843	40612	26127	22520	20219	27699	31040	29040	23005	18393	28739	23768	26774	26936	22450	19734	30670	29005	22092
383622	106.562	24936	23653	30219	26346	31757	29306	24219	35329	18705	19502	32427	36046	15109	6994	20774	13167	16913	21872	22439	17433	11792	28601	26023	23919	26184	35537	42612	26624	21421	15294	25468	35641	32219	18497	13583	23583	25375	27144	23445	25826	24034	29976	27791	30231
385424	107.062	36080	26682	23294	23132	20000	21549	27699	40138	27606	18670	30184	32473	12774	6636	20173	20659	18855	20890	25653	19086	15977	29560	29225	20450	28196	35768	32855	27421	20497	15687	22184	25156	28277	16913	13202	25329	21109	27641	23260	20578	16924	30705	31144	27872
387226	107.563	34820	36439	26265	22011	34046	26080	23734	37468	36832	21479	27098	26589	13873	5630	17976	16901	18173	21063	18867	19988	11734	18809	31942	21630	25710	29167	39029	30034	18474	11098	22150	34231	31791	17179	19109	31965	23179	35144	23653	25456	15630	33121	35387	19722
389028	108.063	38786	27156	29213	28531	30393	29768	20774	38300	29005	21549	28184	30820	12728	7445	16011	16427	21052	19757	16612	19849	13214	17098	25352	23317	19907	31040	40578	28277	22219	14185	23514	38196	27491	20046	14081	27456	23341	35341	20069	25156	14624	38161	21398	23583
390829	108.564	31826	22080	22612	26612	24612	17375	21075	33606	23861	22843	26254	21895	12890	9792	18381	16497	20300	18450	18404	19514	17745	14069	28716	26786	30173	36543	45144	29815	23872	13387	25676	24820	28393	16427	14162	21641	24936	35699	20312	20080	22416	30011	28647	17560
392631	109.064	34820	29294	24092	27653	14335	21884	23606	24809	18023	27479	21190	16844	11468	6855	17144	15017	16335	17248	17422	17815	12890	29260	30786	23271	26716	32670	43641	22612	21618	17433	21757	30774	19572	22358	11329	20520	26057	38381	22127	23144	16809	27248	25849	20208
394433	109.565	26439	23179	28820	33526	25919	21202	31560	25028	16127	20104	16693	23445	14000	6092	24797	18867	17791	21641	23699	18820	11907	26809	34335	25606	28578	33572	35815	22404	23572	17780	26739	32647	19930	26393	17133	22323	23861	30092	21109	24705	17607	31560	21560	21699
396235	110.065	31514	28046	29260	26971	34635	22832	18208	31965	29502	29352	19595	38728	11560	8647	23017	15676	19606	22843	25780	15930	14867	28947	26127	27988	24832	30416	34404	22554	24404	14057	24485	32254	21086	17988	14994	28046	18416	37595	18219	20867	20497	33364	22924	19595
398037	110.566	44670	24566	35294	23919	26855	24138	22277	29248	33919	22601	36971	34346	12462	8994	24393	21907	18971	25364	24404	15537	17953	26358	25132	28069	26057	34982	27109	30057	20809	13514	22034	28011	18208	16867	14566	29849	16335	35826	21861	31953	21803	26231	23514	17734
399838	111.066	35491	23098	30023	23040	25861	21815	29907	41618	28219	29791	40485	33884	12682	8312	25167	17572	18150	24115	28774	18115	21826	26381	31098	25676	28358	35260	22393	20138	18797	14543	25329	27953	23618	20265	12693	23710	28404	30554	21075	18300	22728	27468	31468	25849
401640	111.567	34196	22115	31803	25075	36161	20254	30797	40959	26751	29341	29618	26624	16023	8717	24994	21017	22716	27202	29294	24566	24797	29618	31560	28751	33433	36346	37052	21618	18138	15942	23815	38081	28913	19213	15410	22543	31271	40427	29098	22196	14196	27583	28138	20682
403442	112.067	29421	33664	30092	26173	29803	22208	29236	37942	26670	24543	28832	33364	18231	7861	38716	21919	18924	24127	32381	24127	18069	30034	43318	31930	27421	42208	41121	17757	20797	20069	23468	27780	29329	17768	13422	31560	22635	35341	26312	18739	21583	27930	22901	26381
405244	112.568	35341	24196	25063	29398	27456	20427	30046	36369	25132	23502	31930	30971	18196	6693	32647	17699	19745	26797	29329	19410	21005	28254	28393	30404	31976	40982	42081	32057	20369	20242	22485	25641	28774	18624	16462	25364	21734	30682	23630	25953	16450	30277	27167	20427
407046	113.068	33294	23156	22705	26774	27375	18416	30971	31618	28901	23121	24196	27040	20739	6647	30080	23468	23572	25294	26508	21098	19919	24127	28277	32601	31167	41399	46474	19907	18948	11618	30404	21086	17988	23294	23710	20289	20635	33236	17676	24497	15676	32716	30485	21502
408847	113.569	30832	25283	24589	21352	35202	26219	34219	29976	26462	21942	21179	28601	18809	6717	28104	31306	21988	25999	24219	17560	22578	23537	26670	26589	27329	30104	37156	20427	24820	11029	23549	23225	16959	23861	12682	20034	31306	32774	14404	22774	15179	26728	26543	22601
410649	114.069	31630	27260	28450	21583	35641	18069	31491	31236	25063	27930	33052	28358	20104	7214	28416	19976	21005	22624	23456	18127	18612	18890	33838	29410	22820	28971	44740	19248	22497	15005	28462	35156	27028	14531	14162	25364	23445	33479	10474	23768	17422	34971	25549	23699
412451	114.57	32751	23872	20820	23375	27375	18670	27757	32208	26612	20566	27144	27329	18115	9410	30809	23872	22404	28242	30543	27306	17329	17225	31202	36242	27421	31514	30508	26543	19398	15352	26346	26208	21514	15433	13664	22774	24705	34543	25375	21421	12855	29260	23167	17803
414253	115.07	30173	20832	22161	22473	22820	20878	26473	24184	26427	26242	24728	24381	14057	6300	31722	21271	21063	27144	26578	27075	12982	14427	28427	34312	28369	34011	38751	27236	16589	13537	24971	25398	24381	20104	12011	20670	23410	27572	26612	26855	14150	28335	24127	16809
416055	115.571	25653	22080	24971	24184	27757	19687	30971	23722	25202	23895	26115	26219	21711	5526	23526	22369	21537	25525	24658	21630	12925	13641	23098	34554	26531	31907	37202	19942	16323	10774	21132	23734	22809	23618	17595	19341	21606	26127	24173	20427	15503	27676	20404	19687
417856	116.071	28867	24323	22716	20485	23699	21040	25213	25641	21965	20890	21572	21930	22208	11479	22127	27942	20832	27236	23630	23098	14566	28161	20763	34497	28867	29907	32196	21063	21549	11306	19306	25410	31595	20786	12925	23132	22543	28739	24670	21676	16716	23699	23768	14994
419658	116.572	24739	23583	23849	19248	26508	19953	27710	22716	20809	21757	23028	22462	20901	6994	19815	27953	22728	23421	25699	19711	18277	36624	23375	35225	25861	27676	35017	21549	17953	13792	22716	33306	22069	14913	13560	24300	28346	29167	22416	23710	12335	25687	20543	15329
421460	117.072	26289	21630	28369	20994	30196	16069	21098	22462	18878	23329	21653	21791	21468	6936	24728	23271	19791	24531	24924	29121	18404	30277	36138	35815	27849	30184	31410	19930	21676	15445	25768	27514	16948	16647	10092	23456	21722	23445	22601	21456	14057	25121	21329	14138
423262	117.573	24381	21965	25803	21098	29525	16439	25121	25017	20115	18312	23421	24670	23479	6058	35526	29826	20323	27884	27156	25595	17144	33815	25826	34578	28323	32705	31456	21005	18867	14612	22728	20416	24647	20404	15398	18774	27132	27803	19687	26809	17167	31942	21479	11653
425064	118.073	24508	20057	19630	20867	29005	20069	22474	26473	20369	24497	23167	21121	20358	7306	26843	21965	25167	30647	33387	22115	15849	27999	25861	28381	23028	29930	26242	23260	20369	10821	22635	21699	27121	16913	12786	21676	27861	27005	20208	19364	14057	23213	19976	13699
426865	118.574	24335	25456	24381	21109	24416	19433	26323	21098	18196	19237	23815	21156	20901	7526	24416	26693	28762	23387	25583	19052	12323	26312	27849	31398	29213	29757	32184	20485	18832	12173	19965	24913	27895	17849	17583	20393	24797	31179	17768	25040	11491	21433	18358	15549
428667	119.074	25999	23156	25572	23618	23942	23526	23514	19202	15618	17583	27121	22994	18820	9399	26670	27537	21537	21872	22080	20127	17294	26231	21167	34011	24231	27468	28971	19653	18474	16774	19606	34300	22647	24473	10971	16485	20289	25445	21491	18335	15734	27895	17514	16381
430469	119.575	29260	22254	25075	20312	27722	18971	24497	19179	17595	18161	27098	25341	15190	7214	24497	22196	21237	24982	21248	25849	13202	20184	32450	29757	23121	25976	31849	19237	13560	18370	16462	21988	21421	20786	13792	22138	20982	22994	19699	23468	12844	22358	17052	15792
432271	120.075	25479	18786	23699	14358	21109	16901	20127	18057	17294	19375	33213	25225	14925	7087	20161	25953	30080	20381	26184	20080	11711	20462	30416	25919	22832	31479	29132	16219	18936	17653	21352	20404	16890	17318	13468	21190	16543	26786	15375	17826	14104	23560	17364	13329

[truncated: 3 more sheets: Ave 6, Wells 6, Quantification]
