# Supplementary material for: Drosophila PSI controls circadian period and the phase of circadian behavior under temperature cycle via tim splicing
Source: eLife journal article supplement (doi:10.7554/elife.50063), 2019-11-08
Supplement: supp [file elife-50063-supp-v1.zip › elife_poa_e50063_Figure_2_figure_supplement_2_source_data_2.xlsx]

## Sheet: Averages 1
0-72 hours: 12-12 Light-Dark (LD)
72-120 hours: Constant Darkness (DD)
Period analysis: DD, 72-120 hours.
Time (hrs)	TD2/+; BGLUC/+	PsiRNAiKK/+; BGLUC/+	TD2/PsiRNAiKK; BGLUC/+
0	20980.4	19670.3	18632.6
0.501667	21584	24971.5	20174.1
1.00361	23921.6	21966.2	18678.1
1.50556	22883.5	18941.1	15807.9
2.0075	23685.3	16093.9	14959.2
2.50944	23454.9	15177.2	13203.4
3.01139	22836.2	13187.2	12367
3.51306	21272.3	12418.5	11709.8
4.015	19349.2	11774.4	11443.8
4.51694	18545.1	10242.6	11537.5
5.01889	16014.5	10437	11010.3
5.52083	16293.9	9519.67	9963.42
6.02278	14375.7	8871.33	10072.8
6.52472	14902.3	8630.25	9600.5
7.02639	14746.8	8497.83	9277.62
7.52833	12913.5	7856.83	8810.33
8.03028	12988.5	7414.83	8711.25
8.53222	12768.5	8198.75	9642.38
9.03417	11949.9	8368.42	8969.67
9.53611	10703.9	7848.67	8510.88
10.0381	10382.1	7791	8308.42
10.54	10627.9	7719	8128.5
11.0417	11341.1	7372.42	8369.08
11.5436	10271	7301.25	8175.29
12.0456	10027.9	7270.83	7665.46
12.5475	10546.8	7669.5	8601.17
13.0494	10351.2	7695.25	7858.33
13.5514	10845.7	7627.08	7461.12
14.0533	9139.33	6978.92	8079.38
14.5553	8582.33	7215.83	8618.38
15.0569	9030.33	7306.08	8267.5
15.5589	9348.75	7582.33	8482.92
16.0608	9890.25	8157.75	8792.54
16.5628	10039.2	7540.42	7877.5
17.0647	10532	7548.58	8423.33
17.5667	9732.92	8037.17	8673.08
18.0686	10172.6	8579.92	8291.92
18.5706	10187.2	7905.17	8047.75
19.0722	10303.6	7795.33	8545.21
19.5742	9567.5	7096.33	6989.92
20.0761	8903.58	7396.08	7850.92
20.5781	9291.25	6981.08	7375.58
21.08	9430.58	6872.17	7119.17
21.5819	9960.67	7247.58	6808.96
22.0839	8395.67	6574.25	6117.17
22.5858	8794.17	5842.58	6324.38
23.0875	8290.75	5618.58	5807.62
23.5894	8013.92	5560.42	5867.38
24.0914	7089.75	5369.92	5859.58
24.5933	7819.5	5681.08	5317
25.0953	7181.67	5529.67	5189.83
25.5972	7632.58	5336.25	4882.21
26.0992	6850.92	5492.08	5095.21
26.6011	6105.92	5421.67	4402.21
27.1028	6336	5463.25	4525.96
27.6047	6067.33	4691.58	4067.5
28.1067	6031.75	4434.83	4038.71
28.6086	5784.58	4092.33	4011.62
29.1106	5943.33	4078.5	4117.75
29.6125	4682.42	3954.42	3665.83
30.1144	4979	3881.33	3592.96
30.6164	4924.67	3788.75	3728.33
31.1181	4995.17	3678	3988.12
31.62	5378.25	3730.25	4050
32.1219	5835.67	3923.25	3967.21
32.6239	5452.83	3757.83	3839.83
33.1258	5110	3948.67	4046.04
33.6278	5346.42	4173.75	3924.58
34.1297	5506.83	4213.75	4017.62
34.6317	5945.92	4268.67	4196.46
35.1333	5304.92	4523.33	4593.75
35.6353	5672.58	4361	4589.38
36.1372	7163.92	4891	5300.67
36.6392	7532.75	5213.75	5113.71
37.1411	7723.92	6232.25	5548.17
37.6431	8512.75	6660.17	6277.88
38.145	8804.5	6673.08	6601.88
38.6467	8485.92	6777.33	6225.04
39.1486	9458.33	7437.17	6421.58
39.6506	9948.92	7285.33	6820.96
40.1525	9551.42	7753.83	7074.33
40.6544	9616.92	7910.75	6797.58
41.1564	9198.33	7511.42	6752.46
41.6583	9082.92	7343.42	6333.25
42.1603	10454.4	7500.17	6180.08
42.6619	9009.08	7778.58	6583.25
43.1639	9482	7242.08	6239.46
43.6658	8944.83	7009.17	6008.04
44.1678	8975.33	6689	5660.04
44.6697	8489.25	6683.42	5264.67
45.1717	8429.83	6842.33	5671.42
45.6736	8603.58	5878.25	5788.17
46.1756	7048.5	6221.92	5169.17
46.6772	5852.92	5548.92	5021.62
47.1792	5025.92	4446.58	3930
47.6811	5690.5	3817.08	3802.96
48.1831	6332.67	3480.58	3658.92
48.685	6301.25	3404.5	3715.46
49.1869	6407.67	3319.58	3215.54
49.6889	6211	3507.75	3099.33
50.1906	6644.33	3668	3139.5
50.6925	6110.83	3104.42	2936
51.1944	5396.33	4206.58	2853
51.6964	5526	3762.75	2581.38
52.1983	5283.75	3638	2497.71
52.7003	4776.58	3557.5	2431.42
53.2022	4179.17	3510.25	2383.67
53.7042	3882	3011.17	2190.12
54.2058	4148.08	3090.83	2182.04
54.7078	3809.25	3129.42	2223.79
55.2097	3343.75	2900.92	2298.38
55.7117	3240.75	2784.25	2355.12
56.2136	3788.42	2714.08	2294.5
56.7156	3575.08	2930.17	2363.46
57.2175	3563.17	3053.25	2596.58
57.7194	4252.08	2883.67	2507.46
58.2211	4157.83	2941.67	2578.12
58.7231	4117.75	2898.75	2799.67
59.225	3477.42	2890.17	2913.67
59.7269	3897.17	2903.83	3067
60.2289	4294.67	2842.58	3434.92
60.7308	4736.5	3401.67	3587.04
61.2328	5812.5	4308.17	3847.46
61.7344	5897.25	4357.17	4056.83
62.2364	6580.58	4380.25	4459.04
62.7383	6494.42	5044.25	4866.17
63.2403	6576.92	5012.75	4826.83
63.7422	6664.92	5054.08	4829.38
64.2442	6748.08	5366.58	5168.42
64.7461	7333	5799.42	5511.62
65.2481	6891.58	5716.33	4978.17
65.7497	7067.08	5940.25	5201.25
66.2517	7224.17	5860.25	5273.83
66.7536	7216	6234.33	5611.12
67.2556	5954.5	5769.42	5032.75
67.7575	6305.67	5500.25	5007.04
68.2594	6722.08	5691.92	5020.04
68.7614	6372.75	5280	5054.83
69.2633	6667	5205.67	4984.88
69.765	6726.58	5528.83	4877.38
70.2669	5868.58	5022.92	4479.33
70.7689	5326.83	4748.58	4137.79
71.2708	4955.33	4193.83	3991.92
71.7728	4883.5	3993.58	3990.25
72.2747	4647	3598.58	3982.83
72.7767	5026.17	3240.42	3716.62
73.2786	4745.92	3536.75	3483.46
73.7803	4852.75	3883.92	3373.88
74.2822	4740.5	3876.42	3037.67
74.7842	4308.17	3648.5	2954
75.2861	4059	3623	3079.21
75.7881	3717.92	3244.67	2901.75
76.29	3884.5	3108.92	2859.88
76.7919	3897.08	3144.58	2385.33
77.2939	3709.67	2738.92	2492.83
77.7956	2946.92	2358.83	2452.12
78.2975	3061.42	2563	2543.75
78.7994	3428.58	2705.33	2449.25
79.3014	3494.25	2562.75	2532.62
79.8033	3130.5	2673.58	2269.96
80.3053	2808.17	2554.17	2417.33
80.8072	3154.5	2327.83	2381.46
81.3092	2970.5	2322.5	2696.33
81.8108	2985.58	2246.17	2611.25
82.3128	3115.83	2176.42	2785.12
82.8147	3387.25	2192.17	2855.5
83.3167	3002.75	2425.58	2653.88
83.8186	3504.83	2299.17	2610.96
84.3206	3188.83	2594	2870.88
84.8225	2848.58	2549.42	2917.38
85.3242	3391.58	2380.83	2812.58
85.8261	3066.33	2201.25	3100.79
86.3281	3634.58	2602.5	3110.17
86.83	4050.75	2756.5	3121.25
87.3319	3875.25	3298.75	3375.04
87.8339	4860.5	3024.42	3200.12
88.3358	4356.58	3085.08	3392.33
88.8378	4685.42	3509.75	3636.5
89.3394	4513.92	3191.67	3304.54
89.8414	4582.5	3345.83	3440.5
90.3433	4078.58	3595	3365.75
90.8453	4311.5	3258.08	3363.96
91.3472	4926.58	3539.92	3222.88
91.8492	4619.92	3353.17	3261.33
92.3511	4658.25	3298.83	3237.29
92.8531	4353.92	3530.25	3512.04
93.3547	4103.25	3292.5	3398.17
93.8567	4366	3539.08	3102.17
94.3586	4485.67	3365.75	3018.88
94.8606	4088.08	3121.92	3174.17
95.3625	4219.67	3180.92	3019.92
95.8644	4094.5	3620.5	2931.83
96.3664	3947.25	3252.42	2795.29
96.8681	3861.08	2989.67	2642.79
97.37	3897.83	3123.83	2556.92
97.8719	3755.5	3015.42	2579.96
98.3739	3668.67	2918.58	2605.17
98.8758	3623.17	2747	2525.83
99.3778	3577.08	2817.5	2340
99.8797	3538.75	2810.25	2325.04
100.382	3821.08	2640.92	2315.25
100.883	3459.58	2621.25	2246.79
101.385	3540.08	2626.5	2230.5
101.887	3543.42	2544.33	2151.71
102.389	3122.58	2400.17	2280.04
102.891	2986.75	2361	2371.25
103.393	2895.17	2279.33	2304.29
103.895	3011	2171.67	2168.96
104.397	3084.5	2250.92	2254.5
104.899	2717.33	2147.75	2356.58
105.401	2750.58	1966.67	2229.33
105.903	3297.5	2385.08	2507.46
106.404	3193.42	2139.75	2521.79
106.906	3127.83	2159.5	2566.71
107.408	3170.75	2231.75	2631.25
107.91	2846.92	2382.17	2676.46
108.412	3178.08	2341.08	2603.67
108.914	3417.92	2350.83	2698.17
109.416	3081.58	2627.92	2593.5
109.918	2729.58	2284.25	2664.83
110.42	3182.67	2252.5	2567.38
110.922	3704.75	2213.83	2481.83
111.424	3665.92	2390.75	2566.25
111.925	3720.17	2700.92	2543.67
112.427	3943.58	2620.25	2617.29
112.929	3677.67	2421.33	2582.08
113.431	4001.83	2550.42	2611.88
113.933	4123.33	2550.42	2550.71
114.435	4085.25	2712	2440.46
114.937	3873.17	2656.92	2431.54
115.439	3867.08	2468.92	2612.38
115.941	3345.25	2542.5	2459.25
116.443	3595.08	2750	2374.21
116.944	3406.67	2752.75	2342.5
117.446	3405.92	2544.08	2267.96
117.948	3660.58	2544.75	2193.88
118.45	3469.42	2515.5	2218.54
118.952	3373.42	2665.83	2142.38
119.454	3738.25	2551.08	2210.29
119.956	3064.67	2301.33	2188.25

## Sheet: Wells 1
		TD2/+; BGLUC/+ Wells												PsiRNAiKK/+; BGLUC/+ Wells												TD2/PsiRNAiKK; BGLUC/+ Wells
Time (hr:min:sec - from reader)	Time (hrs)	A01	A02	A03	A04	A05	A06	A07	A08	A09	A10	A11	A12	C01	C02	C03	C04	C05	C06	C07	C08	C09	C10	C11	C12	G01	G02	G03	G04	G05	G06	G07	G08	G09	G10	G11	G12	H01	H02	H03	H04	H05	H06	H07	H08	H09	H10	H11	H12
00:00:00	0	30144	16799	18371	33190	12410	19176	12667	16939	19463	28568	27760	16278	11892	21547	52360	12794	17963	41673	10923	13167	21116	7861	13347	11401	28537	20561	13394	20242	9156	16330	15781	13917	20888	22971	10171	17263	11957	14985	14146	22254	27234	21214	32475	13303	7207	15900	38254	19042
00:30:06	0.501667	17282	22850	21180	36854	11094	28076	15899	10355	22866	27953	25576	19023	32760	26930	33495	21705	21986	44777	4911	27549	21949	21734	23137	18725	34108	22912	25652	20818	5751	18276	19508	19196	23163	20293	10867	15696	29740	17315	21982	15496	15302	19085	29334	11805	22562	14397	29370	21550
01:00:13	1.00361	25922	21837	17211	32721	21504	35153	18946	22489	25248	29756	21477	14795	28054	26483	20777	25446	20938	25577	17145	18155	20251	19680	25088	16000	25463	21540	18961	16765	5960	24295	19741	18290	19396	13440	9910	17587	17061	18533	29798	13138	27499	13043	30639	16452	14519	13539	23606	19100
01:30:20	1.50556	31208	26279	20434	23466	27342	26532	20861	18614	16580	31564	15354	16368	20097	19620	21882	22997	16535	17304	15579	19575	21003	23884	14918	13899	22859	17739	14858	11722	6264	18333	21377	15020	18263	10057	10163	16773	12152	15352	21127	12483	26711	16807	25309	14195	16377	9686	15776	9987
02:00:27	2.0075	27423	25869	19314	40244	26851	22637	20565	22106	16111	27281	14653	21170	13744	14690	24678	19777	10734	13397	24178	11976	17306	17755	12209	12683	26062	12407	19780	12087	4037	13521	19046	11882	16764	10314	10671	14353	18916	12592	20747	12108	20899	14389	15574	17729	22282	10195	12875	9792
02:30:34	2.50944	31634	22993	24014	33330	31899	30196	13844	18728	12949	27656	12075	22141	15030	17984	19706	16735	9268	13248	24579	11956	16538	13867	11911	11305	20876	8434	12262	10824	5920	13571	14189	10301	18582	11051	8211	13042	14079	30062	17371	10024	17238	8503	14928	12127	17993	8885	9804	8604
03:00:41	3.01139	27209	22577	26168	36685	32441	20960	14145	20039	12603	29403	11851	19953	13892	13474	19436	17772	9321	12114	14910	7942	13184	12525	11230	12446	18075	11365	13909	8544	4554	12168	13637	10058	15846	10890	6354	11990	10013	25347	16747	11108	10106	11737	20615	9913	15117	7546	10987	10181
03:30:47	3.51306	26977	18796	16740	34783	33589	19665	13387	19025	11263	27281	10011	23751	12662	13241	20897	12341	8734	12407	11850	7634	14897	9642	12401	12316	18573	10371	11873	9997	5630	12002	13459	10753	12350	8622	5650	13312	11775	14741	17536	8962	16574	11843	12915	11075	14000	7829	11388	9805
04:00:54	4.015	24529	21082	17716	33680	22459	15855	11301	15630	11833	25012	7252	25841	11286	12039	18176	8441	13072	9086	12473	9343	17216	8297	10354	11510	17255	9683	13691	10513	4377	9418	12050	8847	15326	10164	6347	11267	12250	19043	12435	8312	11028	11161	12788	9760	19001	8460	10137	11337
04:31:01	4.51694	20372	17289	17132	32166	26860	15985	11528	15034	11936	22037	7993	24209	10314	8533	13781	6598	10793	11721	13355	8324	14339	7841	7765	9547	15583	11467	12546	9529	3838	15929	12043	9812	10953	9301	5856	12306	11273	25092	17996	7189	11838	10930	13291	10382	14310	8759	8126	8550
05:01:08	5.01889	19557	19166	13585	19493	23062	14703	10744	12119	9975	18544	6446	24780	8834	11740	17143	6949	9323	9234	13398	7883	11632	11465	8407	9236	13795	10581	12023	10775	4426	9609	14297	8270	11232	9777	5213	10142	10840	11798	11425	8634	16112	10373	13942	8595	13302	12062	18832	8192
05:31:15	5.52083	15916	18411	16451	24142	27812	14505	9472	11760	10327	15636	6769	24326	8980	10589	16171	7132	10437	7285	8520	6826	11567	9234	8880	8615	13473	10159	10941	9399	4021	7512	11713	8308	11327	6593	6561	10175	10936	14890	14243	7878	11424	9588	8460	9665	16997	7855	8427	8577
06:01:22	6.02278	13298	16087	13478	20447	23788	14946	9990	10995	8594	16463	5870	18552	11568	8258	12440	7058	8379	7596	8017	7709	12494	8433	7545	6959	13254	10216	10856	10472	5354	9085	9909	6685	9965	8564	5181	10280	10318	21365	15568	6063	12580	9240	9874	7746	12656	7497	8654	10366
06:31:29	6.52472	14676	18981	14982	23167	21351	14326	8759	10654	10071	13154	7108	21599	11946	9982	11166	8265	7485	7783	7572	5522	10869	8629	6794	7550	13562	8778	11458	9221	3548	9473	8177	9025	10656	7330	4256	9206	10168	11718	11842	7157	9543	8130	9079	8500	13418	7901	17491	10775
07:01:35	7.02639	15066	18860	13384	20349	27998	11781	8890	10726	9745	14078	6122	19963	7520	9678	13857	6398	7072	6648	6870	5728	10522	9253	8841	9587	12194	8045	9028	8473	4370	8517	11002	6825	9743	7179	5499	9232	8052	9617	13853	6629	9032	7894	10042	8603	14618	7346	18762	8108
07:31:42	7.52833	12589	17838	13521	20977	21183	11108	8427	8698	9571	8901	5725	16424	7427	9427	11758	8268	6783	6862	7981	5981	8054	7992	6993	6756	12496	9365	9615	8534	4617	6675	8565	6650	7797	10361	4427	7837	9147	8503	11992	7010	7718	9570	13351	7904	13682	6338	9879	9415
08:01:49	8.03028	13796	20387	11158	20972	20096	9895	7784	9230	8264	11471	5992	16817	8147	7552	10393	6328	7279	7508	6491	5975	8809	6997	7807	5692	12452	9412	7728	6976	4854	8617	8795	7884	8669	8085	4042	9669	7774	16957	11283	6453	7989	7551	9508	8240	10850	7541	7841	9900
08:31:56	8.53222	12427	19164	10742	28300	17862	12013	7890	7020	9662	8875	5456	13811	10308	8840	10697	6672	7805	6642	7302	6960	8394	8500	7477	8788	12812	9173	10869	6611	6293	8704	8047	11827	10828	7136	4541	8817	8765	16037	12912	7622	14176	7056	10667	7235	19346	6262	7063	8618
09:02:03	9.03417	11826	17536	12067	16607	16454	10551	8776	7158	10249	15099	5487	11589	9749	8007	10049	7926	8187	6320	7818	6322	9349	8907	8451	9336	8524	9634	7669	5806	4331	10544	9812	12088	8146	7872	4641	8019	8833	15972	11592	7680	6887	8096	10391	6779	10861	7514	15454	8127
09:32:10	9.53611	12898	16312	10368	15428	10905	8467	7575	8560	8931	10188	6922	11893	9582	10273	9636	5984	6468	6920	7085	4981	10234	7632	7187	8202	10993	8324	7124	7837	5209	11000	7343	9326	9093	5429	4653	9667	7135	8226	12208	8357	8602	7638	9888	6860	10425	7059	15042	6823
10:02:17	10.0381	9570	17138	9695	15272	17046	8717	8130	6968	7787	7030	5040	12192	10896	8688	9897	5290	6952	5315	6497	4257	9911	9946	7597	8246	10939	8319	6700	7998	4938	9269	9773	8113	7787	6515	4716	8190	7218	8746	9750	5661	13572	7151	9832	7549	8995	6390	13499	7782
10:32:24	10.54	10139	19083	8113	15195	16785	9355	8066	7779	7225	8058	4673	13064	10619	7026	9786	6055	6814	5460	7437	5096	9755	8502	7964	8114	11909	8018	7312	7018	4878	9053	9748	7971	6531	7824	4561	8156	8052	8584	9652	6871	7120	9336	10147	7561	10154	6669	10262	7697
11:02:30	11.0417	10186	16130	10213	21952	16680	9715	7910	7093	8281	10094	6129	11710	11303	7460	8853	6311	6147	5298	6408	4147	10035	7791	6721	7995	10613	9240	7090	6948	5983	9598	8821	6906	9104	8073	3825	9322	7586	9952	10997	7326	8889	7405	9314	6873	8540	6700	13970	7783
11:32:37	11.5436	10689	17878	10845	17190	13432	8944	7528	5775	5991	9853	5222	9905	10868	6926	9563	6327	6645	5264	6922	4637	7224	7114	8376	7749	10902	5031	7845	7753	4052	11543	9183	8173	7139	6558	4496	9071	7167	10425	10727	5747	7098	6297	8067	8363	9545	7015	17917	6093
12:02:44	12.0456	12626	14508	9492	12159	18915	9834	7380	6290	7484	8948	4497	8202	8837	8502	11270	5954	5540	5715	6981	5191	7865	7797	7866	5732	10076	6838	8617	7280	5284	6964	10773	7451	6494	6340	3785	9219	7889	9137	10017	7697	7779	8666	8974	8053	9680	6287	5896	4775
12:32:51	12.5475	13418	16997	8392	17621	13465	8372	8020	6949	7319	12024	4029	9955	12195	8123	10957	7972	7331	5887	6114	4703	8444	8925	6023	5360	9660	7257	8460	7262	5395	8366	10005	8531	7033	7017	4894	9270	7723	13252	10640	6576	14023	9731	8483	7719	14584	7200	6320	7027
13:02:58	13.0494	10353	16204	9588	19616	14286	7851	7097	7654	6601	10083	4450	10432	9092	9080	12126	4954	6721	7060	5762	5579	11268	6515	8439	5747	10522	6202	6805	7213	4689	7725	9283	8093	9448	7543	3977	6050	7404	18642	10623	5658	10258	7501	7530	6438	7744	8366	6392	4494
13:33:05	13.5514	12349	17205	8857	13577	17147	8946	7289	9471	7898	12858	5568	8983	8655	9808	11174	6371	7979	7640	6635	5500	8076	7188	6406	6093	10005	7016	6428	7353	5927	8873	7916	7533	9162	5662	3337	8470	6687	9838	13535	6077	7117	7908	7465	7155	9051	6328	7082	3142
14:03:12	14.0533	12767	13592	8154	9890	9542	8101	6653	8305	6139	9424	5587	11518	8066	7666	9859	7239	6681	5617	6285	6264	9554	6816	5492	4208	9323	7773	7740	7710	6138	8219	9990	7440	8238	6452	3819	10385	6492	19860	10034	6431	5383	7672	7185	7717	8104	5518	7780	8502
14:33:19	14.5553	12291	12097	9036	7861	10384	8820	6514	7948	7453	8006	3934	8644	9637	7566	10576	7819	5226	5895	6945	5416	7206	8257	5515	6532	8786	9738	7490	8882	6754	6767	9799	7325	9856	6729	3460	10307	7716	11913	11635	6590	18258	8410	7471	6400	7682	7583	10394	6896
15:03:25	15.0569	10848	15640	8182	10521	11256	8067	6524	7609	8149	8289	4884	8395	8579	6162	10179	7413	5990	6266	7467	5811	7656	7443	7012	7695	9095	9506	7904	8012	5429	6492	8995	7444	7534	9336	4511	9886	8461	9051	10590	6384	11290	7908	8067	6487	7504	5811	14589	8134
15:33:32	15.5589	13701	10987	10368	11981	9129	9256	7709	7736	7081	10088	5738	8411	13064	7464	9361	7878	7302	6205	7959	4266	6960	7454	6355	6720	9466	8853	9908	7386	6075	8125	11061	9399	8473	6215	4803	9352	7682	10785	10478	6781	9830	5557	7753	7434	8481	6138	16138	7417
16:03:39	16.0608	16357	12737	8749	13691	11461	11867	7154	5971	8961	8455	5220	8060	9402	12357	10513	9644	6738	7076	7538	5855	7002	7864	6931	6973	7321	9639	7502	8204	4514	8344	9804	8577	7048	7787	3843	9462	8091	19453	12144	6907	8315	9441	8109	8567	8716	7561	13811	7861
16:33:46	16.5628	14951	14121	8620	11913	12094	9980	7651	8000	8130	9363	4520	11128	9597	8207	8636	6765	7228	5903	6656	5651	9674	9005	6654	6509	6771	8712	6875	7884	5959	8005	7479	8352	6491	7609	4631	9136	8458	10020	10989	6011	8312	7843	8276	8101	9150	5249	10475	8272
17:03:53	17.0647	15272	13529	7719	13286	12148	11148	8651	10351	8898	10255	4299	10828	10806	7139	9772	7316	8104	5971	6626	5996	7306	9440	6882	5225	8060	7821	7198	9060	7805	9677	7838	8655	6680	7302	4662	10134	8509	9537	11899	6401	10834	8754	8563	8510	8545	7131	13529	5056
17:34:00	17.5667	13023	9685	10109	12336	12341	8936	7405	8682	7920	11091	5303	9964	10152	7875	11637	7414	8599	6300	7134	7532	8026	8329	7151	6297	8281	9503	8624	8373	6032	8755	8671	9254	7020	7604	4817	10509	7043	10287	11502	5694	14395	8928	7814	8301	8326	7682	10357	10382
18:04:07	18.0686	16367	14587	8666	10620	11522	10557	7980	10291	6702	11248	4939	8592	9006	9550	11446	8044	9881	7789	7858	7875	7474	8380	7753	7903	8783	7745	7811	6014	4775	8089	8684	8621	8936	6606	4612	8037	9255	14255	9726	5098	11050	7546	8455	7406	8001	8208	13787	7506
18:34:14	18.5706	14919	13916	9416	9822	13976	9591	6426	10253	7033	12175	4997	9723	9737	7716	10432	7316	6225	8420	7623	5458	6687	8775	9310	7163	7709	6859	7146	7228	9250	8974	9760	13597	6529	6542	6425	6786	7743	8840	8995	5904	8278	7773	7094	6235	7025	5358	14390	8706
19:04:20	19.0722	12494	13648	8658	17534	10456	13001	5975	10046	6542	11396	4807	9086	7490	7461	9212	8837	9098	9120	7893	4293	6932	8346	6826	8036	7363	8259	8077	8689	6324	6115	7512	9183	8085	7606	5156	7794	7327	10429	18711	6307	4911	7777	8023	8057	13429	7780	14679	7492
19:34:27	19.5742	10913	11001	9567	14990	10243	10359	6882	9529	5645	9311	5809	10561	5937	6509	8458	6768	7626	6478	6686	5910	7208	7891	7528	8157	7385	7654	7625	7662	6136	3489	6810	8774	7060	6901	5136	6646	6317	8824	8253	5829	4324	7588	7302	8181	7440	5251	9916	7255
20:04:34	20.0761	14713	9011	7923	11202	9190	8626	7888	4936	8588	8229	6841	9696	8731	6986	9876	8385	7893	7090	6904	5973	7213	7626	6365	5711	8132	9236	6912	8054	6439	6868	8082	9003	8549	6271	5616	8277	7333	14744	9093	6679	3434	7238	7547	6583	6945	6852	15566	4969
20:34:41	20.5781	11345	12429	9962	11803	8067	9439	7059	7940	7723	9264	6440	10024	6798	6793	9760	6385	7729	6773	4832	5359	8670	7133	6901	6640	7982	8335	8012	9324	7209	7251	10286	8655	5740	7439	5256	7285	6561	10260	12450	5099	1977	5685	6805	6485	7341	5959	12914	2704
21:04:48	21.08	15116	13389	8322	10697	9081	10340	7662	7972	6384	9668	5543	8993	5492	6573	7962	6438	6145	7391	6406	5740	6438	7679	9109	7093	8005	8538	6118	6771	5279	7226	7225	8071	7114	7207	4904	6398	8169	10170	9309	6129	11145	6620	6556	4017	4361	6123	13555	1850
21:34:55	21.5819	13206	11263	8042	19847	8353	9831	8763	7651	7285	8571	6434	10282	7713	7132	7035	6442	7616	9106	7434	6401	6779	6993	8035	6285	7046	6869	5617	7446	6732	7205	7593	7529	7346	5528	4277	5242	7423	8913	8655	5613	11222	6112	5172	7385	2930	7709	12553	1298
22:05:02	22.0839	12511	8450	7499	16255	8374	8493	5993	7272	4931	7403	5490	8077	7759	6890	8802	6176	5774	7096	4763	3987	6090	6200	7637	7717	6636	6123	6775	7145	4381	4168	3951	5457	5703	6454	4743	7665	6038	5162	6911	4001	18435	6663	6752	6850	3442	5991	6667	699
22:35:09	22.5858	12352	8714	10536	8692	9984	10029	7166	8027	6969	7523	5313	10225	6147	4319	8651	4378	4396	5608	5206	4833	6780	6495	7552	5746	5462	7229	5640	6346	4315	8954	2645	3921	6510	3143	3180	5766	3859	13891	9067	2850	13982	4215	5742	4906	6507	4349	11391	7915
23:05:15	23.0875	10952	12497	7483	11114	7000	8654	6925	5958	7567	6769	5022	9548	5082	4338	7352	5467	3913	6639	5641	4302	5923	5957	6441	6368	5234	5459	5611	5277	3500	7547	6640	7777	5636	6056	4412	6898	6583	10729	3235	6502	9495	2621	5523	5444	4091	2543	5794	6776
23:35:22	23.5894	12384	11672	5742	10558	7158	10180	5426	6125	7219	5350	5277	9076	4535	5496	6222	4914	4612	6760	4101	4623	5588	5716	5991	8167	5451	6413	6220	6950	5449	6047	7504	5189	5085	4915	3979	6843	6115	5819	6669	4487	11017	6834	3187	6646	4750	6747	3777	4724
24:05:29	24.0914	8722	9081	6160	6382	10950	9192	4697	6467	4949	6034	4535	7908	6148	4288	5816	5346	3309	6129	5357	4174	4612	6660	5382	7218	4822	4996	5645	5974	4274	5355	6388	5365	4850	6506	3406	5306	4972	12124	6410	4134	9893	5897	5311	6677	3935	5615	5227	7548
24:35:36	24.5933	8660	10696	7154	14338	7279	7420	6453	6225	8569	4295	3981	8764	5932	5403	6319	4250	4176	6264	5453	3948	8059	6889	4301	7179	4820	6063	5547	5402	4012	4941	5341	5748	4297	4993	3499	5957	4523	6031	7676	4321	7171	5990	5022	4343	4746	5953	4882	6330
25:05:43	25.0953	9321	10402	6625	13362	5915	7936	4141	5792	6807	4824	3833	7222	6724	4880	5718	7407	3978	5469	5642	5200	5660	6210	5802	3666	4810	4048	4876	4057	5064	6097	6347	6734	4000	5397	4561	4863	5809	5606	6123	3241	4949	5956	5425	5049	4586	5658	4677	6623
25:35:50	25.5972	7114	13707	5730	11000	10030	6641	10886	6825	4243	4365	2969	8081	6828	5099	5542	5071	4113	5479	5505	4770	4319	6947	5032	5330	4692	4713	4360	4867	3002	4735	7298	4555	3512	5658	3623	3986	5964	6334	5214	4371	7412	4430	4968	4424	4149	4585	5223	5098
26:05:57	26.0992	6940	8653	6935	12900	7602	8340	4651	6828	6046	3847	2780	6689	5128	6516	5939	4412	6377	4779	5597	4694	5717	6291	5506	4949	4623	4898	3842	4361	3796	3601	6391	5974	3591	5375	2500	4549	5594	5438	7523	5257	7463	4575	6986	4979	3963	6687	4578	5741
26:36:04	26.6011	7556	7549	5250	7814	5950	7370	5707	6199	5218	3933	3004	7721	5865	5276	5448	4289	5618	4498	6381	3739	7440	6747	4390	5369	4636	4631	3912	4619	2619	4210	4838	4879	3361	4978	2763	3052	4669	5475	6410	4089	6551	5313	3975	3942	2215	4891	3951	5674
27:06:10	27.1028	6220	6481	7574	9583	7965	5733	5971	6763	6250	3014	3129	7349	4520	6062	5144	5095	7142	4747	5840	4884	5347	6689	5627	4462	3704	4053	4311	3461	2810	3920	4879	4793	3230	5040	2845	5419	4540	9732	6077	3407	6559	4272	4275	3814	3816	4819	4444	4403
27:36:17	27.6047	5913	10374	6821	5973	6642	8292	5948	5113	5776	2737	3150	6069	6657	5328	5225	3383	4370	4669	5296	2361	5109	5606	5123	3172	4197	4686	4588	3894	2295	3803	4870	5715	3281	4029	2756	5161	4341	5302	5087	3750	3499	4423	4143	4429	2797	3580	2863	4131
28:06:24	28.1067	5383	6821	7152	12040	7527	6690	6101	5251	3758	2570	3545	5543	4858	5503	4255	3941	3472	4343	5136	2817	4366	5631	4292	4604	6058	5103	3753	5523	2862	3783	4484	4158	2697	4578	2988	2884	3845	3371	6422	3324	4937	2658	4177	3970	2137	4212	4395	4610
28:36:31	28.6086	7010	8122	5631	7423	6821	9064	6556	5052	5428	1970	3357	2981	4579	3324	4628	3544	3872	4518	3682	2810	3901	5693	4867	3690	4303	4362	3872	5161	2853	1983	4256	5738	3337	4056	2823	4428	3220	5199	4956	2847	4082	3899	5033	3482	3614	3526	6762	2487
29:06:38	29.1106	6144	8037	5554	11649	6189	7140	6942	5471	4352	1651	3000	5191	4641	4172	4759	2835	3926	3975	4349	2890	4706	4185	4513	3991	4118	3709	3783	3408	2252	3267	4738	4654	4079	3153	2455	5122	4801	7820	4994	4176	4972	4003	4104	3267	3607	4053	3551	4740
29:36:45	29.6125	6011	7148	5726	6636	4777	6414	5465	3681	3669	1060	2470	3132	3810	4740	4776	3595	3292	4045	5557	3039	4114	4471	3128	2886	3521	3885	3761	4135	2938	3643	6314	4521	1991	4058	2005	2617	4438	4262	4633	2826	2709	4218	3925	4104	3222	2674	4104	3476
30:06:52	30.1144	6152	7820	5363	8573	4253	7416	4585	4728	2544	900	2369	5045	3747	3546	4311	3555	2826	4484	5042	3285	3812	4234	2995	4739	4134	4381	3543	3701	2600	3583	3898	4759	2377	4219	2630	2029	4201	4235	3916	2348	5120	3326	4013	3309	3169	3623	3865	3252
30:36:59	30.6164	3915	5659	5640	8254	8194	7183	5264	4649	2440	694	2597	4607	4783	5019	4418	2759	2749	3531	4348	2703	4169	4193	3405	3388	4134	3965	4152	3427	2914	2803	4255	3186	3024	4061	1943	1956	4812	7902	3433	3083	4916	3667	3701	3605	3379	2995	4636	3531
31:07:05	31.1181	5501	7837	3307	6546	4563	7464	5226	5215	4357	2457	2634	4835	4439	4307	3983	3506	2611	3730	3965	2538	4148	3684	3314	3911	5176	3438	4499	3704	2778	3083	5513	5410	2036	4306	1705	4088	4699	7073	5318	3715	4444	3733	3973	3741	2864	3031	4259	3129
31:37:12	31.62	4709	5977	6744	7516	8049	7148	5101	5429	2940	2460	2638	5828	3681	3053	5051	3116	3441	4488	4504	1994	3677	4558	3763	3437	4144	3381	4340	4184	2970	4882	4933	5277	2555	3748	2664	2937	3959	6762	5080	3805	4784	4270	4255	3496	3022	3329	4736	3687
32:07:19	32.1219	5599	8147	5711	11219	5140	7464	5933	5301	4544	2907	2425	5638	3832	5271	4441	3142	3152	3503	4423	2500	4321	3942	4842	3710	3758	4098	4222	3765	2630	3766	3798	3864	2651	4704	2189	3285	3499	8998	5378	3760	4871	4317	3480	4165	3960	3429	3145	3481
32:37:26	32.6239	5587	7068	5870	7195	7595	6197	4841	4952	5046	2179	2914	5990	4296	3925	3424	3491	3539	3722	4147	2460	3180	4336	4073	4501	4067	3554	4750	3272	3088	4087	4556	4677	2558	3878	1867	2373	4386	4633	4749	4050	4982	3685	4447	4134	4178	3184	4433	2568
33:07:33	33.1258	6149	6668	3748	9097	6961	4801	6452	3640	3637	2059	3334	4774	5614	4042	3802	3525	3606	4107	3964	2705	3553	4620	4130	3716	3623	4292	5322	4491	3575	3762	4906	5647	2097	4250	2240	2277	3856	6725	5702	5473	3993	3618	4958	4010	2142	3350	4310	2486
33:37:40	33.6278	7243	6442	7783	5310	5276	4448	5636	4467	6522	2079	3522	5429	5748	4002	4447	4497	4085	4030	4279	2591	4356	4285	3563	4202	4117	4013	3401	3848	3018	4098	6306	4393	2291	3133	2086	2938	4928	4263	5184	3763	3255	3702	4837	3639	3183	3310	4964	5520
34:07:47	34.1297	7413	8164	3962	9722	3861	5626	6096	4281	5840	1955	3415	5747	5030	4096	4112	3579	3262	5047	3981	2862	4185	6714	3516	4181	4299	3394	4985	3091	2998	5112	4698	4414	2198	4225	2198	2453	2398	4679	4907	3926	5774	4937	3722	3846	3206	3452	8084	3427
34:37:54	34.6317	7635	5728	4072	11823	9038	7592	7304	3514	4113	2069	3183	5280	4354	4514	4948	3623	3169	4903	4165	2755	4706	5401	3859	4827	3591	3593	5500	4562	3388	5177	4933	5221	1655	4096	1874	4004	4781	7008	5333	3899	5471	3018	6035	4540	2532	3075	5071	2358
35:08:00	35.1333	5488	7195	4574	7531	6459	6494	6121	5083	3998	2177	3089	5450	4541	5464	5875	4284	4801	4507	3919	2914	4329	3843	5933	3870	3740	4506	5426	3425	3198	4848	5534	4151	2036	4155	2242	2430	2295	8163	5876	4817	10310	3840	6825	4038	3355	5067	6146	3827
35:38:07	35.6353	4621	7968	7736	9170	5220	4965	6248	5380	6208	1597	2942	6016	3297	3754	5079	3284	4427	4733	2849	3887	4945	6150	4195	5732	4084	5134	5608	5385	3008	4931	5751	5705	2351	4510	2990	2333	4040	7002	5406	3917	4918	5150	4795	4451	4918	3846	5428	4484
36:08:14	36.1372	5671	8307	8302	9805	9229	9399	7193	6116	7602	2147	3438	8758	5493	5350	5140	3806	4523	4807	4197	5173	4381	4098	6662	5062	3778	5627	6304	4424	3331	5605	6440	5648	2822	4487	3363	4576	5383	9129	6939	4290	4460	6864	5568	6216	4076	4246	6720	6920
36:38:21	36.6392	6952	11174	12380	9499	9934	8298	6400	5373	6820	2786	3328	7449	5611	7297	6076	3933	5180	5529	4068	6449	4293	6461	4272	3396	3932	5341	5575	6327	3276	6656	6519	5724	2577	4687	2873	3916	4582	9987	6256	5027	2728	5471	4699	5591	5154	4636	6790	4405
37:08:28	37.1411	8988	7931	11888	10588	9016	6538	6963	7400	7940	2834	3667	8934	6953	7438	7574	4804	5718	5537	5898	4861	7454	6838	6370	5342	4488	5011	6010	4414	3224	6374	7714	4659	2795	5567	3814	4522	6613	10370	6732	5436	4959	7087	4070	4767	5447	6372	7780	4931
37:38:35	37.6431	10777	10005	10333	8993	11488	8966	7984	7677	8912	4125	4383	8510	7086	7191	7782	5269	6680	6404	6764	6941	6999	7296	5829	5681	4248	5661	6279	4079	5983	8245	7483	8406	3391	5131	3499	5846	6313	5714	6415	4763	6927	7352	4898	6798	6528	7829	13603	5278
38:08:42	38.145	10936	11095	11118	11630	12330	7639	8121	7727	7021	4060	3997	9980	6897	6818	7315	7064	4409	6185	6674	5086	7810	7881	6701	7237	4629	5989	8040	5567	5678	7690	6976	8225	3175	5829	3637	4911	5896	6751	6670	4790	12166	7010	10916	7483	5648	5155	12199	3415
38:38:48	38.6467	12758	9587	10854	8970	11233	7864	8694	6926	7341	2999	4251	10354	6664	6869	9422	5702	5999	6065	6141	5576	6535	8271	6690	7394	5271	6152	6668	6348	5014	6165	8039	4938	4661	6420	2763	4148	4571	6899	7018	6593	7878	7958	5513	8392	4822	5842	11502	5826
39:08:55	39.1486	13411	12111	8254	15099	11216	7296	9470	7862	8496	3496	4907	11882	7173	9162	10026	4682	5847	7647	7601	7261	7146	8614	6552	7535	5207	6150	6775	7352	5984	6847	7269	9115	3386	6602	3420	6102	4323	8142	6792	5400	8552	6986	5477	7063	6671	6596	7691	6216
39:39:02	39.6506	11051	13762	12769	14151	12347	7016	8969	8838	9425	3744	5200	12115	6876	7731	9314	5395	6997	8420	7005	6196	7129	7875	6073	8413	6110	6391	7274	7590	5404	6096	6793	9097	3689	6576	4188	4160	6594	7945	7448	5227	8210	8836	6081	6836	5373	5803	16230	5752
40:09:09	40.1525	12460	12105	9567	13554	10741	8679	9344	9888	9370	3739	5422	9748	5478	10926	11605	4675	7286	7538	7501	5471	8504	7995	8536	7531	4651	7323	6698	9005	5947	7371	6341	8909	4366	6567	5315	4496	5756	14787	7878	5579	6779	8272	6022	8266	5267	6734	12145	5310
40:39:16	40.6544	13767	13324	8860	11714	9740	8615	10981	8815	8177	3609	5280	12521	9285	9041	10400	5280	8693	6186	6229	6778	7726	9538	6684	9089	4528	5953	7568	9700	5832	7656	7560	9751	4171	6680	3688	4523	5177	9002	7161	5604	8803	8301	6206	6616	4242	6563	11453	6404
41:09:23	41.1564	10085	12366	10114	14365	10356	9246	8761	8893	8104	4249	4676	9165	8258	8127	10161	4920	7124	6321	6833	7021	7202	7912	8001	8257	3932	7291	9549	5207	5680	6000	7490	8850	4891	6707	3748	4608	5584	14277	6939	5055	7768	6899	6643	6700	6833	6527	10427	4454
41:39:30	41.6583	10970	10424	8934	9668	12072	7624	9550	8229	10358	3299	7086	10781	8153	7940	9075	5241	4811	7946	6638	5761	6878	10378	7467	7833	3381	7827	7138	7514	5849	3593	5240	9195	4581	4104	5198	6674	5214	9401	7861	5553	7726	7568	3797	5841	5553	8005	8732	6453
42:09:37	42.1603	13330	11379	11515	18087	14477	9791	8384	7363	9190	4653	6221	11063	8127	8378	10436	5024	4077	7763	6522	6172	7231	10254	7572	8446	2985	6041	7968	6664	5903	2237	8979	9247	3849	6465	3823	5682	8690	8470	7615	6807	6515	7373	3392	6909	5335	6733	5954	4686
42:39:43	42.6619	12296	12964	10730	10947	10539	8742	8020	7153	8400	3929	4323	10066	6049	9510	10282	6779	8390	7262	5705	6258	7296	11467	6885	7460	3057	8011	10234	6380	5347	5928	6529	6182	3247	7693	3242	4974	6993	13509	6333	6963	7343	6740	3586	9401	4504	6322	11467	4013
43:09:50	43.1639	10678	11068	9113	13216	13774	10320	8094	8426	10125	3608	6909	8453	7913	11142	9913	4420	5217	6972	4839	6300	6836	10506	5604	7243	2884	6475	7566	5870	6794	8578	7235	8327	3703	6389	3901	3993	5173	7259	11757	5062	7034	4122	8479	7699	4319	7214	7646	2268
43:39:57	43.6658	9410	11465	12127	11078	10450	8702	9865	6993	7992	3269	5658	10329	5765	7092	9972	4188	4717	8756	4595	5916	7059	11455	6289	8306	2614	6914	8321	6404	4643	7288	9274	5035	4584	4541	4094	6606	5847	5046	8528	7080	8630	7692	5131	5937	3445	4007	6165	6367
44:10:04	44.1678	10812	11464	9060	14456	11631	10704	8796	5686	7571	3417	4390	9717	5832	5994	9362	4072	7635	5564	3777	4836	6966	9227	9479	7524	3499	6926	6381	5505	5994	7550	5396	2188	3320	7178	4659	4758	6671	5092	6630	5604	6972	8204	5476	8966	3882	5411	3889	5690
44:40:11	44.6697	9903	9720	9715	12552	8591	8712	9768	6529	9343	3442	5008	8588	5498	7807	9732	5609	5039	5659	5536	5883	6331	10133	6741	6233	3398	7123	6780	4729	5658	8147	6700	1938	3371	4343	4400	4030	5109	5794	8338	3565	3828	7869	5342	8538	4095	6996	2268	3993
45:10:18	45.1717	10401	13670	11975	6372	10192	10297	9728	5415	6936	3085	5148	7939	7548	6236	10099	4413	4571	7088	5651	3977	6077	11013	7262	8173	3132	3796	5728	6199	4015	7443	5890	7427	3741	7496	2958	3788	5930	12381	8813	5041	2537	8289	5415	6810	4309	5203	7026	2747
45:40:25	45.6736	7965	11331	9327	11427	12927	9134	8678	5837	7681	2421	6142	10373	5066	7246	8738	3832	4232	5597	4678	4655	6868	6925	6762	5940	2400	5341	6053	5431	4888	5708	5971	9674	3133	5965	3090	3391	7842	14170	5287	3801	7236	7124	5397	6044	3401	4913	6552	6104
46:10:32	46.1756	7080	9559	10818	6559	10388	5970	7605	5913	5302	3095	5125	7168	7124	5699	8643	4281	2956	7363	5936	5054	6759	9361	6300	5187	2313	6166	6195	4481	3801	5849	5423	8657	2436	3925	3814	3964	4602	5264	7020	4121	8766	7057	6591	4679	3606	4935	4921	5474
46:40:38	46.6772	7300	10904	6739	4706	7289	4498	7367	4450	4749	2761	4346	5126	4557	4424	8079	4220	2142	8350	7490	3785	6452	7204	5719	4165	2508	4592	4168	3260	3466	8958	4968	7417	3055	3805	2581	3896	3475	10509	5592	4208	5955	6329	5762	6259	3654	4308	8498	3296
47:10:45	47.1792	4894	8575	5829	6600	6604	3644	5785	5811	2596	2224	4462	3287	5395	5325	4679	4602	1277	6318	4908	3671	4288	3855	4405	4636	2063	4389	5469	3966	3042	4157	3689	5426	3048	2589	3064	3835	3401	6679	3725	5314	3943	4965	4055	2797	3398	3284	5354	2668
47:40:52	47.6811	7469	8465	5009	4175	7477	4797	5387	7787	6087	2170	4454	5009	3327	3359	6822	3075	1096	5041	2860	3354	5095	3378	4471	3927	1831	5094	5284	3311	2812	3194	3918	5838	2470	2390	2665	3270	2898	5489	4118	2590	4006	5120	3601	2393	3293	2880	8500	4306
48:10:59	48.1831	5839	8328	9374	5886	7113	7820	6792	7087	5826	2448	3469	6010	2635	3388	6093	2343	1779	5644	3658	2185	2621	2884	4960	3577	1266	3972	4239	2901	2363	5294	3792	3862	2460	4672	2138	3183	2459	5577	2843	2627	5394	4727	2601	3638	2980	3539	8423	2864
48:41:06	48.685	4959	9542	8039	8837	5395	6406	6480	6934	7655	2124	3932	5312	3104	2689	8055	1878	1957	5083	2977	2668	3351	2324	3341	3427	1395	4514	5191	2940	2265	4450	4303	3715	1918	5179	1705	2455	2364	5839	3508	5987	4922	4062	4629	4908	2485	3457	4536	2444
49:11:13	49.1869	4866	6247	7151	6046	7023	9658	9725	5487	7343	1915	4107	7324	2523	4176	5490	2477	1483	4397	2598	1976	4276	3593	3750	3096	1195	3841	3892	2337	2620	3652	4187	3428	2707	3966	1808	3485	2172	4410	4652	2201	3569	3649	2938	3924	1888	2687	5653	2312
49:41:20	49.6889	5998	9934	8202	9644	4225	7039	8001	5292	3153	1423	3650	7971	2682	4973	4854	3146	1344	6471	2336	1823	3152	4540	3163	3609	1188	3865	2927	2184	1833	5154	4485	5624	1440	3350	1863	2147	1919	6365	3717	1653	5043	4160	2408	3534	1706	2390	3103	2326
50:11:26	50.1906	4707	8624	8426	9552	7985	7757	6355	7519	7326	1420	3613	6448	3757	4877	6979	2282	1897	4965	2356	2860	3832	3573	2615	4023	1062	3567	4017	2453	1933	3980	3539	3395	2339	2181	2105	2161	2500	4440	4946	2024	5733	6165	2139	3554	1878	2255	3441	3541
50:41:33	50.6925	4441	8288	8093	11641	5637	8281	5544	4686	4607	1198	3110	7804	2615	4397	4508	2270	1601	3880	1969	3596	3072	3465	3450	2430	940	3647	3707	1634	2039	3267	3525	2614	1727	2324	1848	3627	4986	2850	3240	1909	7716	2692	1509	3344	1474	3336	3330	3179
51:11:40	51.1944	3832	7716	6003	7324	6636	7346	5412	5045	4742	1552	3045	6103	5315	6798	4141	2524	4384	5972	3579	2293	3973	6826	2336	2338	914	3879	2882	1878	1756	3987	3052	3582	1713	5290	2003	3415	2396	4163	4018	1786	2717	2853	2772	2928	2292	2112	3195	2889
51:41:47	51.6964	4373	8012	7228	8598	3828	5355	6169	4265	5237	1759	3033	8455	2501	4914	5052	1983	4115	4276	2660	4803	3324	6304	3075	2146	927	3803	2805	1634	1815	3556	3012	3477	1416	3960	1465	1858	1842	2544	2890	2581	2663	3529	1912	2913	1495	2649	3912	3295
52:11:54	52.1983	3139	10129	5936	8618	5621	5432	5223	4255	5126	1478	2603	5845	3738	5487	3195	3089	4524	4414	2618	3198	2721	4914	3325	2433	1338	3746	2568	1504	1670	3331	3046	2908	1260	2406	2102	2254	1548	3202	3550	1337	4020	3216	1801	2666	1617	2164	3986	2705
52:42:01	52.7003	2666	6368	5695	9429	6392	4690	5900	2487	5015	1317	2352	5008	3040	3393	2568	3034	3630	4015	3376	3062	3442	6509	4559	2062	1114	2553	2931	1492	1539	3216	3155	3116	1259	3089	1301	3042	3964	4430	2274	1288	3278	3039	1761	2709	1431	1583	3499	1291
53:12:08	53.2022	2699	6025	4469	6847	4891	6122	4534	2337	3286	1495	2114	5331	3487	5499	4273	1848	3364	2515	2587	3676	3385	5617	3714	2158	1236	2895	1897	1504	1872	1863	2222	2894	1458	2266	1902	2255	2052	6737	2084	1641	5722	3319	1567	2638	1605	2166	2146	1267
53:42:15	53.7042	2033	5235	6660	4131	4993	4328	4099	2769	4860	1519	2843	3114	2847	4446	3173	1788	2962	4413	2328	1881	2847	4719	2690	2040	1112	3095	2773	1265	1915	3048	2877	3222	1331	2683	1667	1578	1646	4162	2893	1592	2172	2011	1421	2575	1838	1592	2768	1327
54:12:21	54.2058	1682	7307	6206	8729	3567	4139	4531	2155	3274	1096	2654	4437	3342	4709	2262	1882	3418	3080	2590	2852	3095	4979	3140	1741	981	2779	2984	2139	1619	2571	1772	1983	1376	3183	1905	1899	3022	3062	2053	1247	2033	2721	1541	2660	2134	1864	3067	1774
54:42:28	54.7078	2531	5480	2892	9634	7005	3090	2462	2612	2853	1271	2163	3718	1951	3529	3078	1959	4239	3828	3352	2120	2748	6417	2817	1515	952	2236	1975	1918	1564	2050	2424	2078	1706	3037	1809	1791	2633	4548	2308	1926	3136	2040	2128	2149	1706	1720	3563	1974
55:12:35	55.2097	2347	4495	3556	3611	4654	4446	4973	1651	2104	1649	2369	4270	3694	5029	2080	1842	3486	2922	2840	2040	2129	4580	2310	1859	834	3153	2463	1468	1440	3923	2317	3232	2323	2490	1250	2103	1871	3791	2810	1823	1578	2512	2777	1593	2193	2644	2840	1733
55:42:42	55.7117	2563	4054	4042	2336	6369	5167	4040	2226	2117	1143	1289	3543	2249	4844	2742	1800	3167	2841	1820	2285	2490	4521	2824	1828	956	2825	2406	1349	1515	4086	2508	2258	2026	2809	1918	1853	1458	2985	3017	1924	2827	3026	2212	2545	2084	2494	3604	1838
56:12:49	56.2136	3423	5160	4783	6848	3242	2978	5493	1514	3673	1043	1994	5310	2789	4084	2205	1921	2923	3546	2066	1512	2606	4440	2524	1953	1097	2033	1723	1354	1438	2679	2764	2301	1418	2911	1546	2380	2709	4504	2239	1413	3195	2594	2628	3052	1922	2114	3707	1347
56:42:56	56.7156	3584	5158	4652	3822	5500	5050	4309	802	3767	1378	1537	3342	2639	4356	3357	1869	3095	2967	1980	1852	3980	5246	2289	1532	961	1683	2068	1287	1750	2960	2315	2726	1598	3020	1527	2036	2699	2632	2346	1421	3821	2097	3173	3082	2208	2839	4286	2188
57:13:03	57.2175	3176	5236	3801	3018	4156	5618	4811	2143	3367	1663	1627	4142	3355	3791	2870	2447	3415	3245	2832	1784	3506	4386	2798	2210	1123	2735	1829	1657	2344	2986	2967	3319	1593	2683	1480	2141	1839	6320	3379	2212	2776	2818	3043	2346	3099	2608	3227	1794
57:43:10	57.7194	5138	7148	4918	3224	5216	6178	5948	3327	2440	1220	1996	4272	3131	4336	2160	2991	2779	2734	2898	1707	2996	4160	2644	2068	1180	2881	2410	1801	2198	3914	3093	2396	2081	2143	1542	2561	2544	4673	2578	2300	3202	2376	1936	2376	2418	2183	3716	1677
58:13:16	58.2211	3731	9002	2885	8621	2974	4402	4611	3754	3567	1307	2151	2889	2497	4456	2974	2122	1908	2374	3358	2040	2725	5401	3371	2074	1292	1779	1711	1836	1856	2608	3876	2204	2117	2522	1621	2394	5813	3567	3250	2507	3680	2022	2822	2328	2066	2231	3911	1862
58:43:23	58.7231	3868	4995	2579	8028	5633	3173	5948	4084	4054	1425	2007	3619	4003	3717	2179	2016	2393	3109	2827	1902	2670	4108	3448	2413	1495	2873	2228	1979	1942	5425	3104	2780	3114	2724	1985	2063	2877	3653	2881	1972	4552	2271	2633	2278	4168	2615	3842	1738
59:13:30	59.225	2844	6965	2496	5274	4079	3721	3694	2511	2610	1424	1740	4371	2590	3156	2672	3304	2228	3355	3507	1885	2835	4460	2772	1918	1849	2549	2564	2199	2016	3529	3085	2753	2510	2571	2025	2320	3247	8297	3388	1659	2341	1904	1951	1864	2641	3448	6519	2699
59:43:37	59.7269	3088	5105	4261	9226	2813	5801	4189	2604	2294	1624	2132	3629	2680	3341	2574	2373	2181	3684	3329	1838	3132	3364	3617	2733	1954	3558	2628	3691	2804	4528	3537	3615	2978	4114	2511	3242	3650	2722	3201	3134	1770	2535	2776	2734	2638	2495	5012	1781
60:13:44	60.2289	3723	4895	3959	6768	5178	5461	5483	2439	5239	1841	1774	4776	2771	3601	3308	2836	1347	2881	2597	2720	2417	4139	3008	2486	1869	3502	3337	2984	2768	3769	4576	4211	3836	4304	1535	3603	4711	2772	4072	2786	2862	3321	3333	4824	2618	2891	5678	2276
60:43:51	60.7308	4513	6212	4804	5046	7074	5626	5126	3026	5438	3101	1801	5071	4117	4571	3255	2936	2041	3115	2987	2948	4188	4570	3590	2502	1458	4386	3015	2561	2443	4343	3601	3855	3976	3871	2493	3707	3696	4054	4899	3274	2132	4773	3010	3679	4196	3634	5402	3631
61:13:58	61.2328	3718	7745	7844	11217	6644	6403	5934	3203	6765	2494	2055	5728	3929	6653	3488	5607	3220	3568	4390	3648	5176	4931	3790	3298	3238	4130	2649	2763	2819	4922	4296	3862	3704	5237	3329	4403	3737	7227	5019	2769	2638	4353	2601	3689	3334	2983	5543	3094
61:44:04	61.7344	4088	7181	6300	8693	9477	7450	5802	3405	5865	2525	2310	7671	4541	6738	4129	3205	3510	4948	4276	3694	4054	5809	3433	3949	2866	3641	3793	3388	2668	4720	4987	3478	3705	4070	3269	4570	5458	6145	5362	3602	1872	4658	3442	4393	4259	2655	5671	4692
62:14:11	62.2364	4790	11034	7009	9996	11313	6398	7113	3953	4760	2499	2376	7726	5147	6144	3842	3480	4112	3546	4378	3919	3926	6417	3606	4046	1985	5197	4212	2904	3155	5346	5376	5759	3889	4780	3400	4998	5107	4978	5401	3882	1181	5529	4049	4873	4225	4550	7861	4380
62:44:18	62.7383	3855	10488	6267	12955	8118	6924	6849	3867	5033	2843	3378	7356	5661	6953	5920	4680	4691	6055	3767	3792	4030	6626	3875	4481	3255	4714	4542	3587	4592	4777	4701	4898	4157	4618	3545	5795	5354	5177	6231	4285	4835	4606	4385	4844	5094	5365	9724	3707
63:14:25	63.2403	5398	10788	6954	9196	9246	7209	7172	4258	4663	2877	2618	8544	5523	6280	5158	4885	3970	4906	5079	4089	4554	7586	3933	4190	2702	5021	3559	2699	4508	6253	4000	5964	4106	5221	3680	4918	3845	4781	5730	3627	4915	5563	4925	5839	4640	3986	10562	4800
63:44:32	63.7422	5630	11445	7225	9943	6950	7740	8274	2668	4991	3198	2937	8978	6192	6061	4255	4975	3906	5223	5430	3965	4597	6444	4981	4620	2404	4847	4688	3791	4293	5938	5629	5471	4933	4981	3309	5867	3263	5587	6982	3149	4714	4374	4817	5510	5017	5146	6082	5113
64:14:39	64.2442	5511	10487	6787	11426	9029	7615	8208	3164	5537	2699	2788	7726	7259	6265	4963	5196	5474	4703	4835	4388	4708	7453	4212	4943	2402	5451	4586	4173	4985	5831	5847	5555	5225	5347	4278	5056	7026	5227	5938	4299	5840	5511	5449	5844	5696	3935	6027	4514
64:44:46	64.7461	5409	14207	6374	13146	8050	8457	8004	4484	5325	3141	3317	8082	5793	9128	5698	7997	5070	4729	5738	4208	4514	7713	4524	4481	3302	5699	4768	5313	3830	5160	5112	6344	5452	4829	4197	6243	6821	9033	7410	4111	5770	6296	5662	4349	5571	3955	8645	4407
65:14:53	65.2481	4768	12146	5328	10245	9252	7398	7101	3339	8464	4030	4079	6549	6652	8032	6080	5579	5960	5899	5351	4374	4884	6566	4346	4873	3023	5101	4066	3852	4868	6733	4588	6670	4457	5215	3388	4518	5166	5412	6062	3697	5354	5789	5262	5244	5301	3173	7584	4953
65:44:59	65.7497	4961	11548	6774	16397	8145	6902	7145	4277	4972	4472	3007	6205	6367	7481	6317	5525	4762	6738	5591	4739	5310	7683	6393	4377	2525	5584	3575	4599	4529	6362	5580	6498	5392	5503	4481	6149	6546	5773	5746	4141	4548	5288	6088	5843	5243	5181	6339	3317
66:15:06	66.2517	6683	11051	6576	14350	8393	7026	6472	5314	6018	4201	4299	6307	7480	8868	5225	5816	5386	4868	7053	4409	4814	5715	6583	4106	2544	5177	6495	3432	4322	5026	5555	5477	4832	4484	4423	5334	6034	6805	6085	4162	6954	4958	5979	4988	6434	5818	6700	4554
66:45:13	66.7536	5959	12405	6963	10846	7546	7693	7196	4386	9051	4498	3499	6550	9590	5375	6922	5696	6895	5811	6236	6784	4502	7487	4783	4731	1967	5109	4606	4413	4871	7016	4981	4858	4767	5674	3912	5590	6240	7309	5845	4276	7058	5194	6830	5600	5877	4560	12266	5848
67:15:20	67.2556	5525	9900	5178	5587	5189	8178	7510	3372	4710	4672	4025	7608	7126	6455	5640	5206	4715	5026	7153	3764	4860	7791	6556	4941	2225	5578	4936	3139	4399	6422	5899	6240	5698	4890	3602	4822	5157	3154	6802	4513	6795	4638	6528	4774	5548	5091	4895	5041
67:45:27	67.7575	6098	9767	6238	10119	6198	7368	6286	4073	4871	4081	3926	6643	6495	6484	4757	5868	5959	5369	5788	4201	4509	7053	4172	5348	2075	5146	4252	3620	4338	6006	5261	6248	5279	3677	4245	4154	6505	5199	7101	3738	6312	4657	4891	3923	5175	5761	7732	4874
68:15:34	68.2594	5234	9539	5945	10249	9438	6953	7104	3448	8342	3431	3855	7127	6523	7399	5859	4986	6633	5375	5918	3972	4110	7145	5354	5029	2556	4178	4956	4328	4085	4392	4173	7736	5631	5604	3851	4961	6075	5244	6838	3529	4903	5210	5223	5350	4897	4418	6781	5562
68:45:41	68.7614	5964	8945	7195	10772	7866	8224	6075	2844	4721	3560	3378	6929	6171	6311	5450	5114	5871	4296	6315	4290	4372	5669	4810	4691	2386	5093	4131	4205	4095	5309	5446	7542	4179	5448	3689	4457	5586	10267	6532	3549	5811	4171	5167	5484	4894	4146	5775	3954
69:15:48	69.2633	5812	9339	6347	10179	9306	8096	8224	3844	4908	3596	2880	7473	5573	5019	5602	4215	4780	5345	5720	4606	3311	7020	6377	4900	2319	5183	3912	4834	4561	6882	5501	7096	4620	4921	2779	3636	5735	8371	5325	3772	7052	4315	4360	5785	4210	5085	5059	4324
69:45:54	69.765	5244	13127	5305	11158	7734	5932	5947	4111	7773	3236	3381	7771	6104	5814	5598	4837	6719	5992	5222	3850	4888	6413	6021	4888	2157	4194	4148	4766	3654	4797	4963	5946	5003	5372	3202	4555	6092	6284	6095	3806	8367	5036	4576	5691	5011	5115	4819	3408
70:16:01	70.2669	3990	9529	5508	8819	8100	5577	6367	3701	7608	3196	3356	4672	5112	4130	5041	6381	4036	5798	4830	3805	4406	6565	5750	4421	2056	4894	4294	2850	3401	5751	4985	5426	5560	4820	2386	5113	5009	4177	5867	3650	4615	4097	3998	5039	4925	5007	5288	4296
70:46:08	70.7689	4931	9635	4601	3807	7208	5457	6163	5663	2988	2874	4117	6478	5476	3554	4114	6172	4970	5185	4466	3324	3807	6923	4706	4286	1969	5094	3668	2930	3799	4221	4303	4521	3865	3727	2517	3939	4969	2916	5193	3814	3094	3785	3778	4832	5116	4370	8131	4756
71:16:15	71.2708	5313	10461	3988	2867	6809	5423	5269	3949	2991	3188	3280	5926	4132	4166	3802	4590	3596	5204	5140	2584	3728	5069	4420	3895	1498	4643	4092	3923	2509	4077	3518	5611	4912	3526	2913	3974	6099	4832	5220	3815	1910	3555	3760	3378	5198	3537	5615	3691
71:46:22	71.7728	3773	8838	4195	8574	6885	4487	6377	3925	3245	2225	2734	3344	3261	4476	4392	4390	3213	4114	5371	3048	3865	4114	4145	3534	1546	4456	3129	4407	2690	4209	4513	5782	3330	2682	2413	3852	4729	9175	3925	3347	4849	3628	4972	3415	4245	3727	3512	3233
72:16:29	72.2747	4057	7325	3976	4262	5523	5824	5628	2887	5533	2742	3099	4908	3115	3014	4939	3354	2873	3955	5626	2541	3347	2968	3808	3643	1907	4679	3603	3326	2698	3388	3965	6105	3791	2379	2402	4518	4091	8956	4670	2777	4518	3169	4706	3290	4474	3806	4313	4057
72:46:36	72.7767	3774	6445	4364	7846	6011	5949	6768	2487	6092	2447	3798	4333	4109	3226	3776	3171	1885	4882	4245	2201	2814	2002	3916	2658	2022	4010	3087	3979	3359	2954	3580	4525	3305	3228	2289	3937	5120	4447	5029	2733	4336	3527	5934	3024	5487	2910	3874	2503
73:16:43	73.2786	4602	7357	3833	8897	5327	5336	5487	2701	3643	1998	2833	4937	4206	3666	3583	3469	1377	3697	3136	3606	3909	3915	4693	3184	1988	4257	3007	3584	1949	3160	3639	4586	3607	3718	3092	4077	3455	4074	4578	2792	2712	3455	3211	3137	3986	3901	4388	3250
73:46:49	73.7803	4753	6910	4465	6364	6875	6310	5628	2048	4401	2274	2921	5284	4030	4377	3008	5194	2615	4380	4380	1961	3674	4935	4309	3744	1950	4044	3313	3268	1848	3717	3105	4608	2746	3922	2124	3563	3758	4620	4733	2735	4595	2998	3438	2504	4025	2792	3484	3083
74:16:56	74.2822	3631	6723	3915	7910	5392	5376	5037	3222	3860	2588	3639	5593	4332	5483	2677	4777	2948	3428	5071	1981	2900	5365	4092	3463	2047	3883	2922	3960	2028	2235	3352	3838	2689	3430	2677	2685	3263	2847	3938	2537	4443	3028	3516	2379	2625	2038	3333	3211
74:47:03	74.7842	4181	5210	4434	7996	6418	4631	4171	2153	3287	2400	2521	4296	4205	4713	3440	3830	2807	3203	4230	2541	2915	5111	3395	3392	1927	3539	3843	2322	1976	4440	2946	4138	2399	3121	2332	3403	3210	3126	3635	2406	4208	2183	3498	2592	2487	1532	3015	2618
75:17:10	75.2861	3337	5046	5130	6163	4449	4341	3888	2478	4105	2216	2335	5220	4350	4918	2695	3846	3280	2517	2983	2843	3507	5354	3819	3364	1741	3373	2207	2878	2424	3532	3622	4006	2816	3414	1934	5560	2613	6364	3979	2082	2518	2010	3489	3060	3283	1030	3267	2699
75:47:17	75.7881	2437	4571	4057	7060	5469	4635	4031	1725	2571	1996	2073	3990	2942	6267	2766	3254	2651	2237	3440	2273	3038	3855	3409	2804	2565	3393	2668	2759	2852	2029	2790	4121	3754	3746	1965	3523	3581	2429	4741	2208	2181	2354	2930	2497	2882	1207	3294	3173
76:17:24	76.29	3596	5150	4019	7318	5556	6086	3344	1566	3193	1619	1750	3417	4726	4403	2486	3018	2596	2028	2636	2277	2208	4398	3457	3074	2968	3899	2938	3533	1794	2757	2982	4062	2603	3213	1643	3092	3332	2931	3292	2221	2134	2185	2822	2678	2860	3647	2684	2367
76:47:31	76.7919	3368	5232	3866	8544	6107	4522	2763	1953	2793	1200	1919	4498	3533	4020	2507	3210	2876	2169	3691	1897	2595	4091	3755	3391	1931	3011	1880	2704	1774	2424	2148	2699	2208	2914	2699	2925	2417	2004	3321	1539	2853	1484	2459	2561	2373	3210	1610	2100
77:17:38	77.2939	3321	6226	4300	6397	5748	3815	2813	1959	2553	920	2306	4158	2968	4084	2537	2736	2572	1919	2475	1835	2158	3926	2968	2689	1754	1975	3923	2789	1331	2910	2602	4026	1862	2070	2076	2719	3374	1742	3745	2429	2850	1769	2654	1744	2557	2357	2568	2002
77:47:44	77.7956	2184	5159	3946	5111	3941	2733	2946	1564	1544	712	1772	3751	2751	3803	1968	2281	2274	1838	2215	1621	1673	2793	2976	2113	1903	2168	3022	2497	1141	2483	2713	2625	1414	1881	1828	2966	2435	4337	3153	2370	2759	2235	2654	2342	2726	1790	3052	2357
78:17:51	78.2975	2496	5161	4272	7060	4128	1679	3075	1730	1490	564	1650	3432	3318	2958	2199	2787	2520	2339	3813	2233	2289	1936	2200	2164	1818	3177	2695	2426	1131	2480	2771	3151	2763	2363	1925	2099	1905	3369	3725	1801	4592	2513	2732	2087	2784	1104	3515	2124
78:47:58	78.7994	3126	5343	3704	6115	4364	3761	3852	1941	2275	1497	1576	3589	3926	3674	2103	3823	2659	2202	2706	1394	2497	2760	2763	1957	1919	2138	2494	2497	1930	2601	2364	3515	2756	2091	2213	2685	2723	1899	2654	1333	4061	1876	3075	1497	2647	939	4553	2322
79:18:05	79.3014	3035	4889	3262	7833	6554	2527	3298	1905	1551	1863	1986	3228	2735	3409	2191	3956	2319	1993	1907	1428	1981	4568	1984	2282	1772	1663	3138	2322	1740	2445	2210	3049	3259	2534	1922	2668	2660	3183	3467	1913	2941	3546	2870	2312	2321	2376	2717	1755
79:48:12	79.8033	3002	4526	3001	6288	3532	2957	3454	2592	2260	1792	1399	2763	2841	3505	2202	2843	2601	1936	3243	1662	1628	4524	3072	2026	1331	1375	2416	1475	1800	2709	1987	3150	2410	2500	2009	2574	2361	3466	3034	1860	1327	2067	2617	2326	2919	2464	2130	2172
80:18:19	80.3053	3448	4984	5072	3536	2213	1805	2827	2124	1681	2073	2218	1717	2712	3146	1927	3223	3157	2030	2565	1520	1777	3109	3340	2144	2178	1801	2853	2179	1571	1936	2041	2802	2672	1784	2324	2755	2473	3391	4039	1624	1700	2009	2714	2212	2516	2468	3339	2635
80:48:26	80.8072	2854	5127	2934	3643	4235	2773	3347	1199	4323	2862	1985	2572	2799	3192	1885	1941	2469	1928	2709	1408	1999	2744	2914	1946	2702	2421	2346	2247	1816	2057	2421	3123	2245	2305	2188	2360	1966	3106	3144	1444	2498	1811	2596	1920	2371	2179	3466	2423
81:18:33	81.3092	2909	2993	2621	4131	4433	2974	4070	2349	2218	2030	1623	3295	2616	4445	2117	2131	2064	1414	2326	1442	1371	3482	2264	2198	1895	2262	2794	2455	1738	2508	2595	3357	3988	2265	1889	2350	5434	4858	2917	1771	2731	2332	2339	1690	3018	2018	3317	2191
81:48:39	81.8108	2480	4255	3211	5249	3126	2840	2813	2411	2315	2234	1742	3151	2575	3109	2519	2147	1670	1474	2485	1562	1376	3826	1743	2468	2356	2040	2128	2073	2301	2065	1875	3597	2633	2927	2066	2732	2139	6672	3475	2172	2661	2251	2393	2031	2519	2459	2537	2568
82:18:46	82.3128	3385	5837	3647	3775	3690	3249	3090	2320	1921	1790	2159	2527	2675	3407	1815	2466	1857	1894	1749	1632	1661	2927	2525	1509	2469	2615	2405	2479	1820	2954	2055	3297	2740	2304	1961	2902	2305	5038	2920	3674	3102	1890	2702	2120	5477	1832	3772	2010
82:48:53	82.8147	2332	7961	3096	4979	3141	2701	3273	2696	2762	2325	1898	3483	2444	3042	1485	1414	1936	2046	2332	1607	2154	4302	1899	1645	1989	2476	2736	2193	1803	3512	2110	4107	2840	2060	2263	2648	4488	4927	2568	1673	5937	2319	2885	2125	2925	2966	2709	2273
83:19:00	83.3167	2759	4866	4104	2493	4052	2389	3179	1536	3670	1672	1942	3371	2716	2773	2285	2123	2044	2748	2529	1579	1984	4142	1778	2406	2986	2171	2999	2601	1653	2225	2256	2758	2618	2289	2193	2614	1971	6293	2623	1833	3485	2132	4185	2194	1940	2013	3137	2524
83:49:07	83.8186	2469	5657	3036	5546	2998	1514	4347	3354	3583	1815	2475	5264	3061	2894	1524	1651	1747	1889	3015	1850	2041	3527	2240	2151	2883	2144	2463	2645	1699	3084	2112	3079	4037	2551	2188	1591	2041	2988	3124	1865	4408	1838	3066	1749	2363	1970	4555	2220
84:19:14	84.3206	2088	6637	3223	4944	4964	1399	2961	1963	3496	2170	1552	2869	2514	2572	1855	2179	3597	2107	3258	1822	1912	4286	2801	2225	3806	2144	2889	2790	2048	3106	2967	4931	2678	2434	1808	2958	3111	3845	3111	1837	3148	2168	3799	1812	2908	2660	3681	2262
84:49:21	84.8225	2013	4403	4380	2463	4282	2243	2686	1706	2406	2043	1821	3737	2530	2327	2349	2946	2152	2212	3134	1952	2086	4291	2524	2090	2619	2936	2231	2846	1580	2477	3694	3684	4119	2460	2840	2722	2642	3783	3231	2084	2406	2361	3314	2149	4611	3603	3307	2318
85:19:27	85.3242	1774	4823	2907	4296	4453	3084	3639	2395	3352	2970	2395	4611	2322	2826	2404	1822	2003	1845	2740	1797	2235	3641	2736	2199	2907	2561	2746	2374	2009	2654	2493	3582	3304	2476	2413	2436	2560	2058	3376	2376	2741	2645	3640	2671	3143	2226	5224	2887
85:49:34	85.8261	2390	4911	3611	3041	4353	1794	3853	2507	1946	2075	2416	3899	2281	3003	2295	1965	1309	1858	2320	1486	2225	2854	2037	2782	3183	2558	3088	2753	2477	3276	3084	3456	3892	3217	2301	2450	2403	5187	4177	2112	2853	2833	3670	2596	3139	2329	4629	2756
86:19:41	86.3281	2197	5594	5352	5755	4306	4060	3509	2178	2988	2370	2867	2439	3061	4540	2572	2542	2184	2369	2510	2232	2218	1814	2507	2681	2947	2894	2732	3172	2923	2820	2698	3747	3575	2692	2929	2386	2702	2745	4508	2205	3263	3734	3671	2517	3082	2429	6011	2262
86:49:48	86.83	2623	5145	4790	8470	3777	3668	4769	3559	3106	2353	2487	3862	3246	3111	2567	2656	2316	3244	2569	2145	3047	3449	2450	2278	2697	2444	2562	3863	1990	2875	3246	4022	3323	2802	2010	2679	3095	6088	5196	2036	2147	3223	3721	2336	3556	2830	3908	2261
87:19:55	87.3319	2443	4867	5794	7090	5510	2913	4508	2050	2500	2506	2537	3785	3149	5596	2796	2981	3223	2979	3839	2305	3855	4062	2508	2292	2746	2916	2677	3518	2649	3675	2958	3721	3309	3017	3109	2880	2951	3519	5163	2717	3072	3326	3904	2235	5594	3065	5985	2295
87:50:02	87.8339	2315	7154	4914	9943	6069	5144	4305	3150	4629	2480	2286	5937	3107	4704	2346	2248	2203	2900	3952	2088	2867	4286	3004	2588	3186	3403	2606	4007	2289	3042	2974	4208	3183	2803	2714	3001	2535	3486	4337	2099	3237	3169	3818	2745	3732	2752	4726	2751
88:20:09	88.3358	2946	5974	4875	6302	5880	3966	4370	3907	5332	2284	2110	4333	3486	3717	3165	3116	2350	2471	3409	2126	2581	4382	3352	2866	3208	3045	3308	4072	2254	3809	2993	3926	3637	2467	2467	2974	2815	2543	4768	2348	3522	3393	4236	2489	5247	3081	6213	2601
88:50:16	88.8378	2950	6956	5577	7096	6485	5335	4915	3709	4784	2233	2545	3640	4272	3994	3500	3395	3416	2833	3754	2781	3442	4409	2870	3451	4020	3263	3055	5747	2789	3842	3790	4400	4451	2219	2325	3100	3076	3796	5412	2742	3485	3355	3720	2203	3956	2883	6494	3153
89:20:22	89.3394	3304	8361	4989	5265	7319	4650	4848	2073	3565	2595	2815	4383	3812	4347	3479	2463	2453	2584	3506	2050	3220	4242	2941	3203	3347	2717	2462	3679	2875	3358	2884	4767	4276	2524	2527	2847	3034	3940	4829	2696	2801	4005	5349	1898	3181	2205	3807	3301
89:50:29	89.8414	2916	4852	7719	7006	7331	5188	4421	2381	2716	2467	3042	4951	3385	4125	3459	3018	2649	2554	4128	2393	3049	5356	3167	2867	3512	2921	3877	3679	2315	5180	3416	4639	3374	3596	2251	3955	3088	2524	5409	2679	2031	4273	3721	2617	3492	3000	4099	2924
90:20:36	90.3433	3539	6801	5258	5284	5953	3842	4346	1899	2827	2440	3484	3270	3704	5199	5234	2820	3142	3415	3570	2664	2997	3821	3197	3377	3430	2985	2924	3266	2238	2934	3188	4324	3203	3483	2970	3497	3929	3600	5617	3110	1492	3235	4256	2893	4626	2065	4387	3126
90:50:43	90.8453	3190	6488	5554	4428	6798	5715	3929	2216	2971	2521	3178	4750	3105	4723	2542	2918	2826	3161	3788	2736	3141	3970	2672	3515	3962	2762	3430	3707	2823	3331	3811	4036	4007	3102	2712	2894	3139	6506	4659	2390	1213	2640	4189	2818	3436	2292	3748	3128
91:20:50	91.3472	3213	9947	4531	7961	7405	4541	4003	4339	3016	2534	3385	4244	4992	4687	2693	4049	3497	2402	4084	3719	2256	3363	3459	3278	3259	3206	3654	3445	2547	3838	3088	3763	3455	3076	3071	2762	3275	3400	4212	4148	1025	2249	3915	2551	3235	3317	3943	2915
91:50:57	91.8492	3547	8315	4646	5886	5854	3493	4789	2461	5064	2595	4598	4191	3922	6626	3204	2363	2449	2545	3216	2628	2616	4494	3085	3090	3543	2245	3035	2598	2388	2803	3054	3508	3220	2797	3050	2851	3014	3346	3818	2965	3823	3393	3963	2613	5769	2352	5026	3098
92:21:04	92.3511	3561	5311	4367	7777	8019	6660	5194	2401	2718	2732	3294	3865	3640	4133	4885	2734	2070	2614	4034	2661	2544	4155	2982	3134	3426	2526	3251	3397	2410	2969	3033	3515	3406	2944	2595	2359	3296	3327	4443	2882	4164	3972	3370	2628	2682	3029	5128	2943
92:51:11	92.8531	2796	5300	4853	6338	8138	6605	4119	2029	2977	2274	3065	3753	4202	5079	4585	2953	2975	2636	4154	2642	2662	3732	3264	3479	3466	3875	3434	3741	3022	2981	3133	3722	4052	3349	2339	2473	3833	3369	3514	2762	8221	4077	3404	2678	3018	2568	3794	3464
93:21:17	93.3547	3048	5482	5950	5050	5235	5596	3750	2090	3365	2695	2842	4136	3721	3842	3569	2929	3128	3820	2533	2586	2668	4382	3359	2973	3333	2853	2401	3597	2305	3405	3069	3917	3358	2890	2010	2850	2840	3261	3981	2797	7921	3596	3300	2446	3122	3353	6283	2668
93:51:24	93.8567	3141	5316	5879	7145	5999	4669	4196	2163	2962	2002	4749	4171	3535	4086	3548	3545	2814	2401	4294	2773	2888	4639	4433	3513	3861	3279	3657	3687	1975	2797	2796	3871	2902	2898	2033	2789	2947	2884	4068	2782	4262	2969	3317	2329	3240	2638	3980	2491
94:21:31	94.3586	3132	5426	5782	8769	5628	5378	4007	2297	4658	2109	2705	3937	3778	4144	2653	2880	4121	2746	3290	2521	2889	4414	3725	3228	2705	3372	2975	3694	1814	3574	2542	3398	3553	2443	2559	3170	2970	1967	4055	2612	3981	3613	2098	2191	3541	3132	3273	3221
94:51:38	94.8606	3290	5546	5806	5905	5776	4370	4042	2262	2938	2050	2764	4308	3108	4667	3270	3187	2481	2867	2174	2193	2982	4397	2689	3448	2897	3062	2551	3783	1886	3005	2835	4561	2978	3101	2547	2813	3231	3185	3871	2380	4595	3317	3157	2736	3468	3622	3547	3052
95:21:45	95.3625	3311	6350	4473	5894	6732	4454	4331	2319	3216	2218	3015	4323	1952	4473	3938	3038	1854	2254	4098	2342	3136	3787	4361	2938	2611	2247	2174	3237	1394	3468	2560	4054	3599	2916	2258	2311	3282	5866	4077	2051	3626	2992	3128	2707	3392	2648	3314	2566
95:51:52	95.8644	2855	5284	5261	6187	4872	3843	3988	2967	2354	2269	3842	5412	3198	4468	2823	3213	3551	3015	3539	3182	2936	5416	4548	3557	2831	2755	4989	3021	1100	3164	2468	3573	2516	2231	2806	2355	2779	2046	4129	1917	3458	2858	2587	2491	3361	1863	6737	2329
96:21:59	96.3664	3213	4598	4921	5242	5140	3356	4128	2621	5553	2079	3091	3425	3747	4860	2793	3092	2100	3323	2992	2174	2817	4209	3385	3537	2806	2611	3371	3045	1794	3279	2472	3273	2268	2949	2359	2639	2780	2717	4025	2180	2850	2120	2936	2275	2492	2938	4193	2715
96:52:05	96.8681	2633	4453	4785	5959	7052	4181	4370	2159	2528	1927	2922	3364	3000	4904	2468	3018	2457	2744	3144	1954	2409	3838	3250	2690	2906	2820	3109	3102	2428	2947	2566	3250	2907	2626	2047	2036	2696	2020	3896	2323	2323	2569	2544	2218	1961	2301	3250	2582
97:22:12	97.37	2475	4639	3476	6738	5656	4426	4150	1949	3037	1945	2985	5298	3622	3779	2918	2340	3119	2918	3778	2194	2388	4495	3472	2463	2773	2736	2208	2844	1780	2776	2816	2313	2916	2830	2090	2070	3090	2386	3664	1794	1539	2451	2913	2565	3347	1710	2972	2783
97:52:19	97.8719	2596	4752	4899	5977	5692	5380	3664	1798	2769	1946	2788	2805	3990	3990	3377	2071	2455	3398	2726	1833	2703	4182	2779	2681	2940	2490	1753	3126	1758	2435	2575	1630	4206	3577	1925	2797	2615	2584	3366	1772	1305	2393	2884	2317	2800	3121	2769	2781
98:22:26	98.3739	3077	5354	4313	5808	4450	3884	3462	2263	2718	1784	4159	2752	3299	3406	2517	2184	2302	2979	2834	1960	2477	4630	3460	2975	2779	2964	2850	2874	1892	2872	2483	2882	2362	2720	1766	2326	2985	2862	3303	1989	3015	2096	2642	2081	2975	2663	2555	2588
98:52:33	98.8758	3433	5164	4667	6034	4540	4621	3273	1959	3655	1673	2960	1499	3585	3675	2622	2647	2070	2349	2635	2335	2723	3840	2104	2379	2676	2264	3369	2570	1778	2612	2363	3506	2672	2699	1786	2648	2621	2713	2773	2070	3104	1711	2281	2706	2692	2334	2884	1788
99:22:40	99.3778	2216	5647	4674	6379	4463	3368	3142	1973	3238	1660	2626	3539	3155	3289	2313	2900	2621	2637	2469	1993	3269	3751	2916	2497	2544	2044	2472	2170	1609	2645	2471	3284	1986	2921	1540	2309	2733	2531	2995	1606	2842	2157	2699	2108	2166	1758	2537	2033
99:52:47	99.8797	2312	5059	4118	5648	4689	3781	3411	2073	3190	1869	2569	3746	2921	3530	2326	2738	2334	3219	3244	1669	2266	4248	2710	2518	3269	1559	2156	2650	1558	2123	2253	3172	2168	2632	2009	1838	2279	1926	3119	1471	4351	1999	2615	1892	2841	1394	2675	1852
100:22:54	100.382	2292	5530	3331	7898	5209	3705	3417	2238	2636	1818	3577	4202	3331	3324	2929	2768	2534	2086	2514	1497	2416	3692	2743	1857	2514	1764	2732	2689	1620	1958	2229	3011	3045	2306	1856	2225	1982	2359	3032	2149	3029	1503	2318	1759	2775	2726	1989	1996
100:53:00	100.883	2198	5395	4960	6811	4755	3641	3241	1831	1715	1636	2689	2643	3042	3092	2034	3119	2739	2618	2917	1907	2026	2851	2969	2141	1930	2457	2412	2268	1465	2350	2315	2631	2211	2327	1982	2043	1959	2555	2629	1657	3016	2137	2477	2066	2576	2084	2453	1923
101:23:07	101.385	2332	5226	3679	6307	4615	3783	2726	2292	2734	1591	3703	3493	2743	3170	2679	2141	2853	2235	2633	1622	1936	4272	2719	2515	2934	2282	2071	2338	1539	2645	2611	1952	2114	2421	1574	2073	1646	3321	3044	1540	1770	2016	2439	2356	2469	1579	2883	1915
101:53:14	101.887	1780	6131	4470	6204	3922	3638	2039	2352	4583	1313	2202	3887	2897	3482	2071	2397	3187	2642	2065	1584	2404	3480	2349	1974	2966	2296	2472	2268	1546	2618	2412	1929	2451	1936	1621	2273	2030	2373	2804	2159	1751	2391	1935	2148	2230	1136	2142	1754
102:23:21	102.389	1496	3414	3466	6993	2843	3197	2991	1893	3584	1552	2604	3438	2963	3974	2140	1697	2021	2326	1591	1467	1896	3450	3011	2266	2574	2182	2742	1977	1199	2642	1876	2635	2384	1778	1943	2269	2297	5119	3080	1645	2843	1854	2566	1916	1915	2312	1589	1384
102:53:28	102.891	1609	3415	3875	3738	4863	2484	2807	1519	2410	1713	2954	4454	2914	2517	2773	1408	2475	1966	3001	1313	2082	3414	2500	1969	2489	3424	1875	3109	1517	2626	3836	3118	2101	1558	1963	2241	2373	2803	2917	2751	2629	1972	2527	1811	1223	2359	2215	1473
103:23:35	103.393	1640	2980	3203	5819	3371	1119	2979	1993	3052	1621	3364	3601	2936	2911	1488	1652	3344	1966	2047	1755	2215	3128	2166	1744	2773	1635	1845	2356	1394	2608	2360	3040	3066	2414	1492	2537	1453	2396	3012	2056	2380	2215	3149	1896	2011	1858	3133	2224
103:53:42	103.895	2016	4461	3162	4054	4488	2295	3013	1593	2964	1606	2672	3808	2562	2910	2208	1267	2122	1546	2022	1677	1694	3817	2346	1889	2962	1727	2139	1962	916	1977	2023	2773	2231	2305	2221	2400	1944	2726	2962	1769	2266	1902	2728	1354	3166	1744	2381	1477
104:23:49	104.397	1701	3699	3682	4155	4780	3062	3296	1838	2224	1777	2876	3924	3216	3394	1747	1442	1908	2155	1995	1618	2054	3206	2326	1950	2433	2219	2149	2272	1408	1753	2413	2772	2929	2321	1768	1918	2178	2501	2331	2266	2309	1672	2718	1567	2488	2773	3006	1944
104:53:55	104.899	1950	3888	2488	2672	4293	3351	2978	1519	2156	1728	2032	3553	2618	2719	1496	1579	2367	2281	1788	1452	1630	3326	2464	2053	2475	2309	1754	2156	1245	2281	1873	3519	2507	2029	1831	2220	3255	2370	2756	1359	2734	2104	2677	2037	2721	2026	4186	2134
105:24:02	105.401	2249	4199	2674	5814	3617	1494	3621	940	2302	1653	1990	2454	2457	2103	1637	2194	2159	1857	1768	1236	2149	2694	1669	1677	2159	2344	1670	1863	1858	2346	2068	2414	2921	2257	2327	1772	2175	2058	2894	1791	2777	2414	2409	1780	2218	1892	3578	1519
105:54:09	105.903	2248	4652	4140	6157	4837	1270	3963	1509	2857	1486	3080	3371	2791	3131	2915	1583	2741	1613	2144	1572	2207	3788	2244	1892	2661	2651	1788	2317	1511	2624	2082	2972	3303	1910	2533	1937	3268	4186	3294	1582	2787	2655	2682	1784	2722	2185	3734	1011
106:24:16	106.404	1848	4399	3557	4440	4558	739	3350	2620	4719	1957	2263	3871	2583	2611	1607	1556	2503	1667	2303	1819	1969	3176	2106	1777	2440	1996	1896	2427	1347	1840	2400	3402	2651	2934	2237	1993	2265	3910	2685	1762	2560	2242	2262	1742	4186	2280	4774	2292
106:54:23	106.906	2472	3627	4106	4761	3791	861	4105	2907	4185	1797	2179	2743	2964	2663	1704	1499	1705	2221	2201	1862	2101	3231	1731	2032	2644	2447	1743	2096	1285	2939	3176	2534	4077	2907	2353	2114	2247	2694	2764	1813	2244	2239	3876	1613	3577	1705	4034	2480
107:24:30	107.408	2360	4758	3099	6033	3247	931	2954	3637	3855	1543	1982	3650	2292	3454	1592	2258	2615	2030	2257	1752	1939	3007	1982	1603	2844	2588	2452	1937	1405	2339	2350	2490	2406	2663	2110	2578	1955	3960	2579	1751	4639	3008	3243	1378	4465	1750	3267	2993
107:54:37	107.91	2265	3790	3994	2647	4303	841	3901	3651	2701	1540	2652	1878	2991	3472	2337	1567	2777	1606	1862	2015	2477	2840	2355	2287	2534	2911	2839	3811	1271	2337	2245	3364	4982	2706	2282	3114	2079	2438	2231	1374	4655	2553	2850	1571	2739	2191	2453	2705
108:24:43	108.412	2097	4037	3798	5291	3341	3549	3232	1475	3608	1463	3570	2676	2840	3825	1689	1923	1650	2100	1983	1878	2055	3351	2477	2322	3391	2317	2321	2490	1328	2984	3029	2850	2593	2613	1894	2194	2341	4249	2914	1835	2130	2284	3849	1498	3661	1969	2896	2858
108:54:50	108.914	2198	3802	5500	5032	3929	4235	2569	2742	3855	1603	2039	3511	2878	2934	1905	1340	2062	1996	2517	1587	2554	3011	3178	2248	3451	2278	2115	2627	1519	2791	2396	2412	2558	2545	2188	2594	2205	5029	3469	2145	2284	2026	4953	1932	3006	2070	3817	2346
109:24:57	109.416	2335	4477	2944	4354	3348	4057	2243	1139	4595	1710	2322	3455	2675	2889	3717	2020	2779	2148	2797	1396	2543	3804	2884	1883	2751	2278	1986	2508	1661	2352	3385	2948	2662	2161	2056	1968	2679	2561	3524	1944	2379	2664	4774	2410	2832	2219	3186	2356
109:55:04	109.918	2264	3109	2998	5939	4548	2663	1402	1462	2383	1625	2307	2055	2319	2210	2272	1662	2051	2201	2588	1316	1877	2975	3623	2317	2631	2587	1899	3066	1597	2454	2200	3877	2427	2494	1969	2268	2315	2573	3184	1539	2525	2757	2900	2537	2825	2369	6690	2273
110:25:11	110.42	1882	4571	3146	5390	4699	3509	2797	761	4320	2245	2306	2566	2548	2170	2508	2182	1634	2370	2547	2727	2033	2065	2076	2170	2927	2352	1846	2285	1203	2235	2533	3095	3877	2372	1965	2643	2834	2213	3179	1872	2171	2908	3210	1852	4020	1654	4223	2148
110:55:18	110.922	2011	5930	4239	3784	6316	4417	3489	1958	2826	1850	2921	4716	2864	2687	2824	1811	1189	1814	2312	2003	2486	1734	2685	2157	2691	2333	2435	2394	1780	2179	2171	2776	2904	2482	1786	1949	2156	3015	3523	1522	2631	2862	3600	1715	2377	1761	3899	2623
111:25:25	111.424	2137	5447	3556	4224	3917	4356	4688	2651	4541	1651	2447	4376	3375	3103	2052	2746	2557	2207	1737	2164	1909	1996	3002	1841	3251	2035	1878	1997	1535	2256	2186	3123	2690	2552	2090	2175	2860	2609	4447	1718	2460	2877	2825	2136	2553	3207	4269	1861
111:55:31	111.925	2100	4817	4349	6746	4491	4676	4212	1875	3889	1630	2161	3696	3118	4172	2047	3356	3018	2670	2436	2489	2006	2826	2197	2076	3001	2578	1870	2043	1416	2297	2499	3045	2779	2557	2090	2289	2877	2653	3668	1762	2276	3080	3028	2477	2547	2163	3812	2241
112:25:38	112.427	2121	4512	5267	8597	5298	3484	4146	3846	2087	1581	2238	4146	2948	3886	1949	2655	2198	2601	2312	2380	2263	3647	2684	1920	2617	2805	2292	2664	1799	2315	1892	3363	2702	2060	2092	2554	2847	2652	3877	2154	2535	2675	3300	1569	2429	2918	4939	1765
112:55:45	112.929	1892	5486	5326	4892	4054	4239	3790	1779	4692	1616	2732	3634	3034	3112	2189	1858	2215	2339	2134	1741	2154	4436	1882	1962	2712	2492	2475	2648	1806	1938	2598	3034	2970	2212	2299	2101	2815	2604	3475	1852	2521	2506	3415	2198	2902	1891	4283	2223
113:25:52	113.431	1975	5816	4828	6348	5174	4378	3644	2615	4810	1977	2749	3708	2744	3662	1969	1973	2097	2215	2479	2247	2439	3477	2818	2485	3383	2322	2068	2665	1947	2534	2275	3152	2824	2422	1634	1902	2979	2542	3616	1932	2603	2365	3318	1556	3699	2826	4091	2030
113:55:59	113.933	1971	4338	5217	8009	5073	5622	3910	3297	3992	1286	2197	4568	3167	3516	2101	1835	2157	2844	2643	1840	2861	3405	1941	2295	2757	1970	2314	2517	1864	2293	3532	2742	4587	2096	1942	1821	2627	2564	3677	2084	2598	2436	2852	1647	2659	1879	3794	1965
114:26:06	114.435	2236	5284	5071	4840	5089	5878	3767	1558	4712	2736	2305	5547	3617	3408	1862	2961	2194	1785	2890	2107	3058	3744	2737	2181	3169	1942	2201	2638	1586	2166	2163	2958	2390	2110	2057	1752	2890	2533	3338	1832	2733	3390	2797	2360	2222	1610	3405	2329
114:56:13	114.937	1949	6242	4034	6662	6085	3735	3829	2917	2786	1976	2263	4000	3495	3771	2278	1707	2201	1666	2830	1892	2406	4772	2495	2370	2591	1935	2050	2752	1641	2586	3807	3022	2353	2336	1321	1951	2285	2981	3790	1712	2329	2323	3188	2017	1861	1680	3414	2432
115:26:20	115.439	2408	7016	3853	5051	5564	4193	4036	2964	2698	2159	2322	4141	3053	3518	2531	2369	1979	2310	2134	1553	2097	3293	2451	2339	2599	1889	2181	2733	1962	2679	2598	2567	2285	2754	1838	1788	2729	4177	3432	2903	1872	2625	4946	1554	2015	2110	4572	1889
115:56:26	115.941	2067	5361	4511	5192	4017	3115	3655	1863	2879	2154	2136	3193	2413	3450	2538	2077	2110	1819	3221	2352	2175	3206	2523	2626	2611	2107	2010	2531	1798	2560	2332	2752	2421	2170	1747	1818	2677	2596	3458	2151	1633	2441	2789	2272	2598	2425	5025	2100
116:26:33	116.443	1808	4353	4804	5535	5054	3223	5974	1336	2793	1840	2782	3639	3304	4055	2075	4097	2273	1720	1773	2250	2160	3455	3378	2460	2845	2125	1751	1879	1982	2224	2950	3432	3008	2151	1882	1734	2793	2125	3476	1690	1324	2486	2947	1976	2863	1862	3171	2305
116:56:40	116.944	1971	4652	5524	4746	4750	2700	3322	1539	3594	1756	2577	3749	3042	5293	2568	2953	2536	1695	2346	2456	2016	3178	2670	2280	2718	2108	1798	2504	1975	2183	2091	3257	2409	2076	1764	1482	2487	2477	3362	1472	951	2726	2735	1910	5284	1527	3203	1721
117:26:47	117.446	2144	4370	3509	5042	6150	2503	3297	1567	2644	1767	3639	4239	3491	4132	2166	2339	2432	1748	2578	2286	2160	2585	2309	2303	2431	1585	1915	2587	2136	2242	2277	3231	1869	2215	2032	2037	2131	2317	2776	1862	854	3204	2322	1969	2474	2594	2991	2380
117:56:54	117.948	1905	4635	5489	5520	4565	2957	3600	3933	2924	1728	2545	4126	3536	4187	2037	2641	2637	1290	2821	1968	2024	2684	2708	2004	2686	2151	1904	2645	1874	1646	2410	3069	1828	2181	1435	2256	2701	2094	2323	1649	629	2653	1914	2089	2156	2894	2845	2621
118:27:01	118.45	1994	5078	4033	7882	4381	3522	3362	1844	2952	1721	2014	2850	3087	3437	2117	2212	1937	2755	3095	2016	2190	2834	2151	2355	2762	1960	3682	2572	1886	2225	1979	3378	2128	2330	1660	1799	2144	1442	2829	1378	548	2403	2124	1930	2626	2570	2738	2152
118:57:08	118.952	1835	3930	3268	7975	4297	3258	2945	1603	2576	1932	2775	4087	2543	4258	2370	3454	1573	1892	3463	1883	2365	3151	2583	2455	2978	1567	2005	2099	1687	2450	2239	3454	1909	2112	1946	2344	1920	2703	3051	1287	473	2197	2305	1905	2077	2271	2347	2091
119:27:15	119.454	1806	7182	3530	6811	4443	3223	2966	3770	2275	2753	2410	3690	3061	4166	2097	2040	2234	1903	2071	1905	2008	3015	3361	2752	2735	2105	1852	2366	1757	2419	2386	3136	2351	2251	1546	2080	2025	2037	2708	1294	2773	2460	2913	2086	1733	1512	2200	2322
119:57:21	119.956	1291	4222	3703	4976	3422	2985	3279	2706	2455	1717	2348	3672	2726	4032	2057	1928	2252	1588	2166	1764	1841	2836	2043	2383	2605	2188	1485	1897	1542	2384	2310	3122	2044	2239	1357	2067	2074	2524	3059	1545	2272	2444	2628	1944	2312	1615	2384	2477

## Sheet: Ave 2
0-72 hours: 12-12 Light-Dark (LD)
72-120 hours: Constant Darkness (DD)
Period analysis: DD, 72-120 hours.
Time (hrs)	TD2/+; BGLUC/+	PsiRNAiKK/+; BGLUC/+	TD2/PsiRNAiKK; BGLUC/+
0	83696.5	97465.7	65951.6
0.5	110048	92170.9	91597
1.00028	97046.5	84000.5	87382
1.50056	101855	80992.2	90704.6
2.00083	99858.2	68127.9	84660.8
2.50111	92607.8	65378.2	82310.2
3.00139	92777.9	59698.4	70861.4
3.50167	80933.8	59606.7	67807
4.00194	74228.8	53962.8	63327
4.50222	69590	49829.3	55683.9
5.00222	65518	48916.2	54859.8
5.5025	66438.2	46448.2	51332.9
6.00278	58181.9	43530.2	48581.7
6.50306	53507.4	42053.1	46450.7
7.00333	51698.5	40716.3	43927.9
7.50361	53786.5	41954.8	44001.3
8.00389	51794.7	40663.7	41870.1
8.50417	48933.8	39390.7	42182.9
9.00444	44195.5	40692.9	39064.8
9.50472	41845.4	41898.2	40624.1
10.005	45356.1	38692.7	39793.3
10.5053	40802.2	39279.9	39507.3
11.0053	39942	38664.8	40462.5
11.5056	39442.3	38991.5	38905
12.0058	40328.1	41286.1	37512
12.5061	39269.6	37057.1	36921
13.0064	39213.5	37992.5	38742.2
13.5067	41610.1	39186	37732
14.0069	37951.8	39077.3	38917
14.5072	40594.5	40800.7	39483.5
15.0075	42744.7	42180.8	39726.6
15.5078	40691.9	42537	38517.4
16.0081	43927.1	45065.9	40053.2
16.5083	41056.2	45709.5	42542.7
17.0083	41403.7	44456.4	41314.1
17.5086	46266.7	43366.6	42700.7
18.0089	43185.1	42216.7	40960.4
18.5092	45766	43187.5	41239.8
19.0094	44496.8	41101.8	44315.6
19.5097	49355.5	44794.2	38316.5
20.01	44071.4	43932.2	39628.4
20.5103	43614.3	39964.7	39993.9
21.0106	44266.6	41888.2	36755.2
21.5108	42137.4	37272.3	37548.3
22.0108	41233.2	33507.2	34815.4
22.5111	37670.2	34833.4	33558.3
23.0114	36474.2	33170.5	31702.3
23.5117	30931.1	35654	27673.2
24.0119	34600.4	28026.2	30095.5
24.5122	27051.3	27308.7	34043.4
25.0125	25927	27924.3	29556
25.5128	27457.6	30973.1	28109.4
26.0131	27687.9	26629.1	27221.9
26.5133	22821.8	24542.6	24146.2
27.0136	21423.7	22982.8	23359.6
27.5136	23098.9	22994.9	24599.5
28.0139	22920.8	20641.4	23140.5
28.5142	18288.6	18883.7	22262.3
29.0144	19821.8	19097.4	22215.3
29.5147	18079.9	17189.8	22491.1
30.015	20497.2	15919.2	22278.3
30.5153	19620.8	15811.2	20195.3
31.0156	20634.6	15438.1	21148.8
31.5158	18901.9	16708.6	20318.9
32.0161	16022.2	16054.2	22167.6
32.5164	19545	16420.8	21885.6
33.0164	17656.5	15544.3	21424.7
33.5167	18948.2	17736.7	22446.7
34.0169	17583.3	17783.8	22304.1
34.5172	15921.9	19325.8	21730.9
35.0175	17072.8	20494.2	25305.5
35.5178	21422.4	20646	25446.9
36.0181	22015.6	19643.5	26146.4
36.5183	26789.8	23443.1	26508.5
37.0186	28959.6	28958.4	26892
37.5189	32999.8	30295.3	30657.9
38.0192	30748.8	28201.1	33034.8
38.5192	35218.8	29709	32768.2
39.0194	35263.6	33177.2	34749.8
39.5197	38768.9	33182	36343.6
40.02	37809	35117	36632.9
40.5203	37417	38035.4	37004.3
41.0206	36586.9	37694	38708.6
41.5208	39219.8	37223.2	38573.1
42.0211	38083.5	39350.2	36799.6
42.5214	39743.5	38921.4	36852.4
43.0217	38057	37887.1	37355.1
43.5219	40198.1	38351.2	36225.8
44.0222	36558.4	36381.8	34360
44.5225	40924.1	35224.4	34188.8
45.0225	34945.8	35972.2	31284
45.5228	33217.2	31217.5	32076.9
46.0231	30651.5	31026.8	31948.8
46.5233	26763.7	28003.8	28852
47.0236	26160.8	29803.8	26516.2
47.5239	24291.2	28273.4	23248.8
48.0242	21096.7	21923.8	22930.3
48.5244	19589.8	19342.5	23202.7
49.0247	23002.8	18904.2	21548.5
49.525	19651.7	19048.6	21305.3
50.0253	22058.8	17435.8	19196.1
50.5253	23262.3	18049.7	20192.2
51.0256	20184	15597.2	18551.6
51.5258	19391.8	14283.2	18667.4
52.0261	17264	12682.4	17033.2
52.5264	16218.2	13589.9	17160
53.0267	15654.8	11772.3	16039.5
53.5269	17160.9	11746.2	14776.8
54.0272	13288.6	11036.8	14960.5
54.5275	13008.4	10740.2	14858.3
55.0278	11452.8	10124.2	14487.5
55.5281	11653.1	11242	13639
56.0283	11191.8	9464.83	14704.1
56.5286	12673.7	10639.6	13066.8
57.0289	12963.8	10788.8	12684.6
57.5292	15354.8	11277.3	12430.5
58.0294	15841.5	13202.3	14577.4
58.5297	13733.8	13752	15327.8
59.03	13563.6	13863.5	14188.6
59.5303	15476.5	14282.8	14570.5
60.0306	16501.3	14708.4	14408.2
60.5306	20447.2	16624.8	16240
61.0308	21810.1	19719.4	18845.4
61.5311	24374.6	21421.5	19406.8
62.0314	25918.2	21080.5	20989.2
62.5317	29805.6	23591	21578.4
63.0319	28458.7	24926.5	24214.8
63.5322	29832	25092.5	25146.5
64.0325	32849.3	26931.9	24525.8
64.5328	30467.6	28153.2	25169.1
65.0331	29476.5	29569.5	26464.5
65.5333	28451.4	30397.3	29565.5
66.0336	30584.9	30168.4	27248.7
66.5339	30403.4	31963.5	28516.3
67.0342	28935	32641.4	25458.8
67.5344	33399.3	32543.1	27731.9
68.0347	31016.8	30618.8	27810.4
68.535	32610.8	31205.7	29750.2
69.0353	32013.1	30179.6	25159.2
69.5356	29797.8	29754.5	26722.8
70.0358	27920.8	26400.5	25246
70.5361	27743.2	25514.5	25911.6
71.0364	22667.8	26090.5	24794.1
71.5367	26028.2	24638.2	21453
72.0369	25776.1	24459.2	20764.9
72.5372	25987.8	24323.1	19854.7
73.0375	24372.4	22786.5	20109.1
73.5375	21286.7	22524.8	20607.4
74.0378	20784.4	20140.2	19473.5
74.5381	22080.3	18399.2	18979
75.0383	22159.1	17677.2	17885.1
75.5386	19564	17145.9	16470.6
76.0389	18153.1	15285.4	15000.9
76.5392	16607.5	15324.2	13489.7
77.0394	15665.4	13100.5	12694.5
77.5397	14476.6	12896.1	12651.2
78.04	14086.4	12794.7	12962.1
78.5403	12956.8	13166.3	13044.7
79.0406	13423.5	11790.5	12417.3
79.5408	13014	10976.7	13049
80.0411	11879.2	10737.4	12374.6
80.5414	12748	10855.5	14292.5
81.0417	12298.2	11023.5	13540
81.5419	11578.2	11062	13616.1
82.0422	11640.5	10493.9	14270.1
82.5425	11530.2	10827.8	13542.9
83.0428	12679.6	11582.1	12970.8
83.5431	11984	11702.1	13918.9
84.0433	13147.4	11771.9	14381.7
84.5433	13275.2	13109.5	13845.6
85.0436	13979.3	13275.4	15170.8
85.5439	14723.3	12842.6	14492.8
86.0442	16210.4	13124.2	15755.1
86.5444	16938.6	14654.1	16890.8
87.0447	16979.8	15467.7	16566.6
87.545	19333.8	16103.5	16090.9
88.0453	18488.3	16640.6	16883.6
88.5456	18009.2	15551.2	18160.2
89.0458	18119.4	15529.5	17198.9
89.5461	19798.6	15696.8	18495.2
90.0464	17826.7	17216.3	18190.7
90.5467	18231.7	17581.2	17945.2
91.0469	19567	17053.9	18322.6
91.5472	18870.7	17322.4	17483.7
92.0475	19037	18009.7	17235.9
92.5478	18714.6	17871.7	18400.6
93.0481	17567.6	18007.8	16845.7
93.5483	17719.4	16913.9	16709.6
94.0486	17673.2	15698.7	16440.1
94.5489	20206.1	17595.9	16477.6
95.0492	18751.6	18028.8	17084.9
95.5494	18945.4	17702.6	17935.1
96.0497	19703.4	15898.5	16911.3
96.55	16446.6	18081.7	16279.7
97.05	16402.9	15413.2	15480.9
97.5503	16733.6	16445.8	16903.5
98.0506	16211	15229.9	16206.1
98.5508	16902.2	14454.9	15629.6
99.0511	14644.3	13936	14222.7
99.5514	15896	12588.1	14546.8
100.052	15129.5	13775.1	14906.7
100.552	13384.9	13453.7	13621
101.052	11771.2	12463.9	12937.4
101.552	10232.1	12302.8	12191.4
102.053	11796.2	10799.5	12404.4
102.553	12755.1	11826.5	12732.4
103.053	13583.8	11312.8	12523.7
103.554	12756.1	10024.8	11685.1
104.054	11879	10446.8	12679.4
104.554	13069.2	11823.5	12701.7
105.054	10116.1	10606.8	13070.1
105.555	12077.5	10742.5	14188.9
106.055	10129.3	11282.2	13903.7
106.555	11946.7	10598.4	13463.2
107.055	11970.2	10535.3	14118.2
107.556	12274.5	10919.8	13132.8
108.056	13029.7	12891.4	13732.1
108.556	11875	12835.3	12757.8
109.056	13739.7	11116.3	13601.2
109.557	12020.6	13445.3	14365.9
110.057	12415.5	11110	14067.1
110.557	12929	11908.8	14506.2
111.058	13748.3	12228.4	13140.9
111.558	15218.4	14487.1	13532
112.058	14010	13301.8	13452.9
112.558	13925.9	12333.7	12609.5
113.059	14893.9	11736.3	13741.8
113.559	14639	11788.2	14046.2
114.059	14530.6	11569.9	13833.2
114.559	14492.4	12541.8	12928.8
115.06	13058.6	12749	14480.9
115.56	13935.4	12140.3	13387.1
116.06	13971.2	12819.3	13144.1
116.56	13384.2	12822.9	12586
117.061	13858.2	11991.7	11952.8
117.561	13602	13396.3	11679.2
118.061	14126.3	12280.6	11765.9
118.561	13181.2	11938.2	11027.4
119.062	12289.5	12390.3	11422.2
119.562	12988.9	13072.9	12433.5
120.062	15148.2	11471.8	11932.4

## Sheet: Wells 2
		TD2/+; BGLUC/+ Wells												PsiRNAiKK/+; BGLUC/+ Wells												TD2/PsiRNAiKK; BGLUC/+ Wells
Time (hr:min:sec - from reader)	Time (hrs)	H01	H02	H03	H04	H05	H06	H07	H08	H09	H10	H11	H12	F01	F02	F03	F04	F05	F06	F07	F08	F09	F10	F11	F12	A01	A02	A03	A04	A05	A06	A07	A08	A09	A10	A11	A12	B01	B02	B03	B04	B05	B06	B07	B08	B09	B10	B11	B12
00:00:00	0	114715	106142	66515	140150	70820	69905	127693	41051	60189	82195	78607	46376	109000	108543	73298	50145	107602	93507	84099	113837	102520	107531	137286	82220	112622	55125	115019	48052	73728	47533	95487	59598	9337	31767	1080	75835	78168	57019	105073	79561	63312	84344	64603	73488	71040	90646	43958	51377
00:30:00	0.5	140976	98328	127509	235071	72272	188511	84639	67279	79743	105729	75539	44979	89941	75518	50436	95512	79755	70748	70719	158109	102093	77637	166746	68837	104685	76024	188937	99617	90777	41747	100455	64827	28392	72183	2316	146905	141674	87058	105082	73006	119002	105926	70888	128238	68693	137066	83360	75623
01:00:01	1.00028	96842	117033	95952	124109	69465	110498	87112	60970	124958	91599	126574	59446	87695	67144	52474	85154	111334	67900	63059	108008	90882	83968	135449	54939	116354	83035	151883	89248	62004	32514	85850	38291	58906	130367	1962	104048	101612	159258	84668	49001	96826	113082	124898	88649	87146	121533	96475	65346
01:30:02	1.50056	94195	153053	91295	139756	130456	100776	71972	76100	103558	90987	127517	42591	76641	68196	48731	98433	90489	65127	69744	100971	74154	74083	152957	52381	97640	86467	146668	79025	75374	28999	82634	48604	106712	84213	2367	138629	108198	109776	51529	130540	87087	134427	141487	103098	85200	118422	120884	57572
02:00:03	2.00083	88125	136835	73800	134005	82444	158588	72529	85470	97049	105892	103487	60075	54255	67933	49204	77202	71369	60885	62738	99514	63456	68216	99231	43532	75273	65633	128842	71669	57796	22433	81938	77831	160544	75877	1932	103428	94858	101739	41380	113246	84525	134213	141950	78202	62573	103281	108046	57163
02:30:04	2.50111	80372	127364	80021	110270	125663	129264	66038	75775	93495	77620	108075	37337	52424	66891	47047	56686	62345	52698	63354	91629	74218	65503	110021	41722	78945	57374	144384	62071	55255	20193	55336	95589	141732	69753	1975	91634	85965	113479	23172	76312	66705	121753	141459	86049	100739	115993	116874	55251
03:00:05	3.00139	85964	118271	80835	129783	134047	135923	59303	47503	82111	82237	104006	53352	49010	67541	39616	68047	63561	55715	53745	77350	56521	53382	99582	32311	65372	50875	99278	52668	41295	17708	47026	96222	105906	58860	1747	79954	81731	95821	21471	90105	56323	115949	146446	77856	51867	75805	111605	45102
03:30:06	3.50167	85990	90494	66671	135019	105948	109481	55449	47115	79823	54876	107632	32708	41734	66672	39110	74669	58936	47609	54757	84686	69959	55580	86172	35396	62962	53863	112179	56597	42160	15180	49242	89725	110211	52875	1519	71618	61856	102435	16957	96784	50968	105188	125376	78903	51293	78751	91528	48047
04:00:07	4.00194	67925	82655	68372	88750	104719	124827	52373	50031	74923	56678	90325	29168	46735	57062	32303	51529	56247	51622	52719	66718	58838	51926	86062	35793	59548	46976	91144	56652	37721	14303	44663	71504	99692	46575	1401	81195	61869	86209	81541	92542	42388	98911	115354	75809	45857	68136	79574	39418
04:30:08	4.50222	57969	70390	50010	106839	95166	118254	45866	40675	72251	53458	91667	32535	40928	45785	28661	57459	36687	44026	42540	78050	59066	50465	73568	40717	53500	47959	80182	53179	37894	12029	34978	63641	91743	42161	1321	78144	64587	70639	48609	78084	38325	83576	101187	63514	41270	58940	60615	39198
05:00:08	5.00222	65312	62565	51609	97192	88429	95209	41392	38654	70787	60594	82757	31716	48178	45271	38059	54167	48381	47301	37860	73201	49242	40557	72838	31940	53145	39894	92891	50436	36730	12953	35793	57940	87645	45629	1333	64739	61674	65460	59758	70508	38633	74923	94454	60510	37443	61941	98987	32784
05:30:09	5.5025	59281	90507	50613	93622	84681	92866	44819	47748	67338	43473	87383	34928	42397	35113	37818	58986	39156	43114	42308	49529	49558	53175	71150	35075	52242	41574	104597	47022	32919	10771	32890	50715	68052	37434	1249	63532	59429	71939	52960	57311	36527	64329	72657	53428	32619	62329	91165	36181
06:00:10	6.00278	56403	46241	41608	88552	71619	82588	37569	44013	70820	45722	84939	28109	40519	36350	28193	54593	39519	46182	41477	49600	48313	39266	64055	34295	52652	44498	74948	43346	33067	10763	39278	45216	57699	45942	1228	71567	55589	51630	43519	69520	38751	57771	66368	54352	36206	71120	72977	33337
06:30:11	6.50306	56986	60847	42063	67123	89388	53559	37455	42507	65127	37536	69550	19948	49073	36780	25273	45283	39320	49048	42009	48018	40768	41789	57762	29514	46309	42452	84386	46254	32695	13759	36953	43224	62578	42486	1139	58016	55011	50613	35902	76168	37156	53078	55517	48144	44503	49221	72644	40325
07:00:12	7.00333	52841	47385	41671	65464	65781	73851	39696	44646	53158	47511	58978	29400	40511	31632	25581	52613	37696	43659	39802	52736	35649	37924	62705	28088	38958	34084	83770	44123	32362	11084	35139	39983	56505	37008	1207	58737	54918	52103	38979	64916	39164	51791	50238	42844	40287	47761	62565	37607
07:30:13	7.50361	59640	63337	42439	73006	59560	63000	46072	37135	62245	37388	67524	34092	41165	33915	25223	41857	42511	38012	42975	57505	48415	44465	52369	35046	48588	37367	79279	48081	37966	12341	34480	37295	55559	37333	1169	52377	55813	48313	33050	58898	38953	56669	50905	46895	36270	56172	64021	31324
08:00:14	8.00389	46364	46494	50529	71139	60965	70487	43979	36354	44971	47465	65186	37603	47938	39987	30358	44650	29754	37519	45389	50525	35181	31961	53930	40772	49301	42545	75598	39595	29328	13088	36046	37244	56302	38721	1063	56699	40143	48195	20395	54188	33603	46925	51398	56171	31219	57163	52660	34831
08:30:15	8.50417	56146	47246	46600	55724	72167	63325	39991	43967	45528	33523	54825	28164	43114	30927	20661	53090	30936	49026	41924	50723	33679	39717	52825	26066	45106	40038	75260	46195	30050	10607	35620	36932	50419	37595	1122	53209	49676	55247	13632	56399	40901	43034	56036	52774	32400	61038	58421	33227
09:00:16	9.00444	41194	48980	41359	59813	48604	62894	30143	38443	44211	31847	58150	24708	39392	33248	24995	45553	42334	48786	42709	55956	32075	38384	54183	30700	48879	34932	80566	45857	31096	11683	30991	35898	43161	40519	1067	50419	40608	41317	8970	56176	33860	43638	44249	38742	31852	46857	45283	37894
09:30:17	9.50472	51044	36443	44224	60991	51170	43076	23493	30100	46874	39966	51795	22969	50406	37721	23459	37544	32130	52706	45714	59978	36616	35472	59670	31362	48123	37768	65418	39561	34067	11345	36806	33624	36400	42182	949	54209	48491	38915	36751	47359	35594	44710	44764	48820	25155	48630	46946	47212
10:00:18	10.005	47195	48790	38540	55264	52985	54914	42798	33236	38354	40059	66498	25640	47790	33299	22336	49917	33109	51419	36455	47984	31012	33974	49934	27083	48010	35451	65718	41405	34535	8641	35413	36839	38570	45486	890	41532	43515	36662	32257	45739	32071	40616	40072	54399	32231	51394	54846	45047
10:30:19	10.5053	38422	36928	40236	60835	33797	55644	39899	32484	40823	39147	53880	17531	49571	32328	20725	33725	46980	47144	36531	54158	35088	36451	46726	31932	41333	34269	74648	38304	35033	11788	34932	36768	34544	41473	907	30780	41025	34852	35907	49592	38059	42165	44317	52065	29742	52167	46558	48140
11:00:19	11.0053	48123	54087	34518	56842	36519	49229	25045	27134	39629	38515	50727	18936	44325	26547	22079	46971	34767	50254	35248	51575	31012	44646	45406	31147	41992	33556	62388	42988	34974	15552	41553	34793	35983	43600	983	43080	45283	42426	35649	56484	37194	40734	35037	54264	31333	68554	47773	40726
11:30:20	11.5056	43469	37312	34244	61615	28619	48457	30995	28877	40629	50356	51010	17725	47186	26552	28366	41291	33746	48077	35084	50157	33949	43279	48246	31965	42253	36620	63932	42000	34181	13539	41684	34624	33244	34295	970	36620	35101	43350	35012	45574	37266	40422	43579	57468	36050	45553	40249	35046
12:00:21	12.0058	42485	25695	31155	62430	36198	40215	36957	31830	41329	52913	46338	36392	52495	23628	31915	49820	38852	41650	41485	49735	31109	52651	49457	32636	42878	33451	54930	44110	36253	10362	35881	37346	36337	33527	899	33101	36557	54213	32919	41599	29282	37451	44853	49043	33253	37894	50508	31700
12:30:22	12.5061	22712	55973	30708	64038	33708	42376	35244	29775	45933	46929	43287	20552	53707	26066	31522	40439	40118	41068	39477	39878	31514	38970	36632	25294	38388	35038	68457	40333	29181	13708	34552	32046	35151	39067	907	48558	36692	40139	35316	52208	38903	38367	49791	28256	24282	51094	39342	29526
13:00:23	13.0064	40692	34071	31826	52310	39633	39553	24311	28746	46600	54770	46722	31328	51934	28792	26623	38679	39582	59750	35843	40721	29269	40992	38806	24919	42599	30978	81102	49723	33316	12126	23674	35519	39093	35291	920	38536	37358	60257	20590	48714	47381	42507	42633	57062	26472	48389	54053	29088
13:30:24	13.5067	34472	46191	26041	59649	42076	45271	42333	37869	52056	41418	50043	21902	42300	27328	37194	41405	35919	54124	39992	40443	36898	38126	53179	23324	41544	32101	58189	37814	30451	7021	30885	38945	38591	37025	970	42983	29442	49343	36890	44562	44165	41431	35725	44477	29830	38810	38299	45153
14:00:25	14.0069	29105	33193	33286	50558	45017	39021	47444	30657	48891	32451	47651	18147	53420	28995	29303	39911	40692	40831	38468	51630	38253	34008	44680	28737	36662	38780	53563	57244	27607	14261	38434	39067	31885	34852	958	40203	30843	51449	35877	58818	36877	39080	38312	62510	31252	50347	42857	35438
14:30:26	14.5072	52500	37662	29256	53036	38223	40000	45452	22383	53398	41979	52605	20640	54124	30586	33847	41608	42464	52457	36611	46334	37379	35493	45022	33683	41131	54399	64806	52947	30860	15497	33472	33366	35046	36362	987	39295	41156	54648	24834	45747	36527	39667	22104	45119	29801	57041	58370	31029
15:00:27	15.0075	37599	59083	33295	55914	36291	50039	39768	31231	55644	36367	49592	28113	51052	35793	29151	50115	29370	49845	38367	49309	33333	41173	64388	34274	47858	47980	65802	46551	29906	11467	37004	46292	35919	32130	865	33666	38548	52753	38924	50018	54331	49187	16801	42503	34025	55336	53504	37894
15:30:28	15.5078	50740	45798	26434	58151	42068	46786	32447	30750	57074	39173	44815	14067	46271	31392	33687	42688	35345	45279	40080	60573	31704	47136	59509	36780	43253	38764	60573	39688	31387	14522	34662	37536	48157	35721	1063	33746	29763	36784	34864	44895	41152	51652	12965	53593	35860	56446	49773	34404
16:00:29	16.0081	36877	88164	39122	74433	35514	45781	23514	31198	55306	46549	42296	8371	59049	27349	36434	46486	33885	46195	36641	53529	30700	51111	73686	45726	50086	39582	83082	41966	32442	22261	38063	32079	37763	31273	873	34991	45933	46743	30354	40059	39983	47891	48360	51158	32282	42836	36413	33771
16:30:30	16.5083	43908	51575	35227	72411	36063	52656	9050	27813	64553	42760	48022	8636	60830	30716	25547	43076	33176	59957	43448	54116	38198	59058	65321	35071	49275	59134	66115	62629	33371	14805	23758	31493	36198	36143	996	41287	41135	62983	36953	45043	52702	45431	46651	49389	31366	67588	48651	34096
17:00:30	17.0083	46229	73125	34632	70191	38274	46883	6725	26455	62937	33877	50938	6578	54175	34548	27328	40346	41004	57737	47676	53217	35257	54698	52998	34493	50010	48090	78557	47528	31185	16083	36101	35063	43777	35763	937	29910	47579	40122	33911	43659	40873	49415	42135	40401	36341	49174	47862	29218
17:30:31	17.5086	48786	46030	29058	64257	32252	46448	74547	20231	58277	45549	45731	44034	42751	32674	26429	40920	35413	54133	44806	66895	35198	49697	50926	40557	42464	49862	72711	55610	31286	21003	37979	38312	30088	36122	979	35118	53247	49752	34177	49769	36012	47309	58518	59290	22421	58053	37996	40388
18:00:32	18.0089	45372	57095	34818	70195	38637	51917	58973	11750	46055	47904	32354	23151	48178	26408	31742	28535	39287	52795	44819	52175	49444	51909	43072	38236	50727	49402	75662	43946	30252	22396	35915	37612	35333	35278	1021	32434	43026	49529	39439	49731	38034	49495	46689	51229	16159	49457	50318	41004
18:30:33	18.5092	40709	59936	41063	74977	31949	43161	54289	11780	57500	45996	53411	34421	38329	32687	37278	62540	45895	46102	51639	44654	37666	48980	35388	37092	55209	47562	71255	41004	32771	25345	50018	35046	41646	39730	911	39797	41764	47950	35843	46676	59966	46372	36843	43178	52985	39548	29134	37042
19:00:34	19.0094	42853	49989	34468	78084	32847	53719	38899	47136	54770	38076	41823	21298	40603	30417	26792	39164	43612	46929	50449	48275	40734	53567	41511	31168	49225	42000	65452	51706	34130	19931	40692	41895	34320	42089	987	39350	51090	39996	37384	47089	54369	45385	34957	60467	44621	70977	44591	36683
19:30:35	19.5097	53728	81073	31514	69478	31615	52208	57403	36810	59294	37485	41367	40291	44418	37303	29113	54968	35940	57252	44477	56602	40945	49567	48415	38531	41810	42439	57357	56902	32522	19547	27885	38283	29839	39848	928	28915	46748	48389	24632	44211	47102	34594	35502	39612	46537	59776	44996	26674
20:00:36	20.01	39034	58914	48279	61096	30109	54513	45317	28581	56564	35147	43401	27902	53968	32999	33961	41992	38607	62050	49313	58353	35881	44414	40650	34999	45207	46858	57902	49512	34383	20623	19763	36443	30387	43967	975	26071	46781	52727	25345	43405	45697	18484	44376	64173	42334	52267	50685	33658
20:30:37	20.5103	37548	48655	42321	65675	32434	51457	50043	31020	50651	36759	40700	36109	50352	29678	29932	24682	40489	46330	41574	51411	42275	53044	33214	36595	52529	51242	61468	37979	28050	19311	46629	40490	31130	38131	873	31995	42106	62683	19535	47262	46908	16560	57897	44346	46988	52082	36624	39953
21:00:38	21.0106	47026	67110	32788	69997	32788	46085	45520	28813	53567	40295	43730	23480	47583	47089	30168	49343	29223	44891	44908	47959	41274	54028	35983	30210	45845	42304	61303	47727	31944	17653	30332	33539	29518	39105	924	32295	31126	45030	30560	47495	33717	57019	43190	32337	33527	48279	28172	37185
21:30:39	21.5108	47402	61987	36531	56876	35717	50757	48119	20619	57555	37409	30476	22201	44882	27598	26969	40181	34628	46916	36860	44958	34117	42789	41869	25501	45929	47469	59657	43832	33286	17881	24400	35780	32193	35624	802	32383	31417	40262	29366	55880	50330	51174	58033	48199	41220	41051	25931	34088
22:00:39	22.0108	47655	41620	35565	59893	25657	44334	37173	22396	57961	47423	43735	31387	44443	23547	24362	36915	28231	45022	35118	46338	30138	29134	36261	22577	38608	38928	49841	41123	33383	19543	21071	31881	24915	45621	869	31189	29729	44979	19417	42245	29244	52643	26391	40759	26463	55251	41570	26328
22:30:40	22.5111	44659	49136	37270	52153	27636	41692	23716	31160	49761	35417	41190	18252	39118	22121	23948	28214	33877	42983	26345	57522	33957	49951	39700	20265	37481	40561	51643	34489	31590	19670	37536	40321	24294	34307	755	21252	24484	42667	14906	62447	19087	51048	43709	34151	38409	45216	31915	33839
23:00:41	23.0114	42422	47862	37299	56218	28902	37029	11332	22961	50149	39569	40548	23400	42473	21822	26822	32096	24847	32649	38612	45963	28223	51259	24754	28526	39840	40253	62017	34240	28391	17488	25982	34628	28873	32565	945	44777	23699	32645	10362	35227	11607	46326	37915	28746	21594	48140	31771	32843
23:30:42	23.5117	35324	34451	36434	58809	26948	37700	5751	16050	40435	31712	34134	13425	55099	27885	27172	21391	37028	51474	38831	43553	38236	36928	26729	23522	35852	35780	44338	40899	30008	16948	16611	18227	21472	33565	751	22066	29978	26948	8345	33058	8797	56720	33869	40181	19590	34248	25982	26818
24:00:43	24.0119	25374	61873	29299	38426	26007	34379	52981	19455	42177	33607	35658	15969	33172	21180	20653	26872	19290	27075	32573	46144	21417	35784	24788	27366	34679	45005	51592	32400	21412	14189	14851	24598	21691	26210	721	39414	32497	34198	6354	39823	7236	42967	41308	39515	21809	45423	30303	26303
24:30:44	24.5122	18919	24442	28923	43832	25269	31695	24573	17223	40384	31577	21493	16286	36772	18379	16345	26421	18792	30552	21256	45279	13986	43034	29611	27277	35092	37354	38257	41139	29721	14940	44448	33691	16999	37126	751	41692	30311	29417	42338	35118	53994	47558	36401	39135	23227	37856	26007	36755
25:00:45	25.0125	30337	16037	20640	39038	22227	32636	34624	13657	26374	29885	26598	19071	36350	20505	22636	32434	15915	31316	31472	41785	17775	29569	29328	26007	32780	32101	35658	37012	29518	13953	41857	33206	15746	27826	683	29033	21569	39523	18851	30446	32670	36742	37949	38814	28180	37700	40055	27898
25:30:46	25.5128	28311	35400	27978	30484	22577	22522	35033	28472	29244	25974	28126	15370	47638	31299	20362	36890	30991	31582	30700	38527	20974	29176	25619	27919	31451	31763	33261	37186	23640	15704	27615	35417	14505	28256	688	23412	28429	31594	14104	36675	45984	47474	32451	26307	16514	37004	29653	22438
26:00:47	26.0131	35143	34869	32830	29476	17619	33312	15851	28332	26695	29835	29535	18758	28526	20560	22720	41730	33253	29218	24239	33978	25353	20417	21691	17864	28868	26227	31657	38405	20919	16493	27754	24750	14126	28750	641	27991	27906	32611	9316	27396	46469	36704	41393	35489	26999	37979	19421	23130
26:30:48	26.5133	25691	19269	22931	29856	22552	29999	13623	24130	26362	21805	25307	12337	29092	14754	14742	25336	19927	41747	31611	31603	24817	22412	19450	19020	34362	34679	28653	36485	22303	12518	21429	23923	9712	25138	616	26889	17269	23117	5805	23147	29029	34210	30434	31396	23277	34497	30476	32151
27:00:49	27.0136	33801	27792	24113	26484	18041	20851	8700	19661	24940	18767	23429	10505	30214	16383	12957	24602	23345	26066	26602	29041	29493	24083	18877	14130	27083	26505	32421	33067	16231	13316	30560	20978	8413	25341	536	23775	18193	38278	4645	20535	30949	29839	33839	22227	16543	32202	20328	15889
27:30:49	27.5136	25661	37308	19910	25809	15400	23526	7738	19311	38776	32088	21872	9788	30856	23050	12619	20163	17657	24388	28299	25172	35966	26054	13564	18151	26556	24476	33012	32746	16307	14763	29577	25193	8717	27197	633	28316	17834	24678	23830	22138	28455	30898	32404	31776	21210	28915	24518	25742
28:00:50	28.0139	25391	36101	24915	28396	17282	21678	5531	28210	29737	21117	25742	10949	23611	15138	13037	15493	16792	28244	22602	26113	35130	19615	18505	13417	23926	30421	33712	30122	14332	18408	24889	24948	9442	26231	548	24442	16948	27628	22079	19463	31299	29290	32227	24505	11640	33548	21332	19990
28:30:51	28.5142	18417	19860	20400	21282	11573	26780	5957	18223	23176	20358	20012	13425	26126	10809	14940	19442	10691	27218	17442	20324	24885	24062	17594	13071	22948	32139	35118	29733	12455	10712	28007	22290	6270	21661	536	16990	19484	27813	19087	21269	32185	29750	31223	29316	13079	25750	27704	19733
29:00:52	29.0144	24142	30505	15531	25075	14995	25594	2261	17969	28919	20307	22547	10016	24552	13586	13742	20117	15404	20509	22412	17877	21986	19657	16037	23290	25780	24113	38675	31911	13856	14379	27653	18501	7826	22855	519	16417	20493	23130	25341	22889	34624	30168	27970	26788	18623	21307	17746	22332
29:30:53	29.5147	13231	31830	17619	24817	12721	20661	5253	18484	20649	19763	21155	10776	18526	10687	10754	18298	18906	22737	21142	19404	20957	17159	15113	12594	22142	29936	37190	30084	17062	13054	21282	21155	6054	21569	591	26505	17974	24463	21260	21231	23493	30438	26455	24455	18779	25885	27413	18598
30:00:54	30.015	11615	20054	19121	15986	13113	25336	43920	11117	23560	17433	28526	16185	22927	11986	10548	16391	8755	18113	15615	19539	15750	21581	15488	14337	20265	22510	29231	31333	14995	14366	26033	21919	6603	20628	536	25775	23374	22471	26311	25940	34886	25130	30763	23961	15974	23957	24750	17248
30:30:55	30.5153	25303	29088	19518	20830	12434	18138	20826	19733	21999	21130	14172	12278	19147	12391	9003	15269	8653	21750	18556	23881	18260	13982	15944	12898	17193	27459	37873	34042	14277	12316	21855	19636	6379	19902	435	20138	24425	27324	12919	23796	23851	28674	22412	17324	14185	17822	15400	16185
31:00:56	31.0156	17349	23092	19847	23168	17497	24417	34215	13531	28396	16906	20729	8468	20999	13273	13130	13455	11117	20716	17775	22003	15750	14619	11514	10906	26919	33599	31400	29754	12404	10025	23682	18969	5493	22931	527	20374	17484	17860	10991	20952	28678	26813	32945	30940	12497	24336	28244	20459
31:30:57	31.5158	10240	25796	25666	15206	13193	19547	23923	19682	23535	19763	19256	11016	21826	21092	11805	20501	14864	19197	17708	17442	17965	12813	12358	12932	21653	29143	27872	29632	10873	13155	22661	20898	6177	22467	456	22130	20113	24488	9223	23206	32438	27683	31396	27104	8025	22556	13796	19628
32:00:58	32.0161	15864	16965	16594	9231	12016	19788	16476	16801	20265	15130	19881	13256	19282	10792	13252	18779	8531	19919	19501	20311	13522	21349	17801	9611	23134	23210	30189	32919	12054	12742	31632	19746	6413	25345	498	22666	20054	23041	18615	28489	31641	35223	20729	15311	18606	22796	27514	17750
32:30:59	32.5164	24024	13721	23687	15488	16957	21543	26957	19130	27425	18121	16117	11370	19442	9902	13379	15754	12189	17931	22054	22058	19180	15320	16104	13737	21227	28742	32847	26387	11265	13337	27936	22438	6362	22611	527	23623	22130	25585	16189	18936	24889	28970	27590	26404	13978	25315	23893	23117
33:00:59	33.0164	20535	30421	13674	10075	13737	17248	16113	17543	25661	18054	20573	8244	20303	10598	11501	18543	9063	17779	21547	19109	16130	14607	17100	10252	26822	29100	30400	25396	11117	8046	28425	20024	5637	22421	527	20653	17910	23151	19130	25856	28121	30476	27303	31075	8556	28986	17531	15543
33:31:00	33.5167	29413	31084	12008	20995	15315	19075	12113	10067	23256	19501	22379	12172	21125	13931	13079	20151	8915	23628	20421	24020	19957	15201	17261	15151	25902	29565	30902	33637	13016	13834	26619	26176	7139	18758	532	21244	23695	20687	17771	31987	29037	29581	31801	22501	20712	32923	27488	16720
34:01:01	34.0169	17969	21556	18476	22235	17860	19678	5991	18336	23906	12354	18602	14037	23488	14054	13598	16839	9746	22075	23526	27126	14581	19501	16391	12480	21860	38641	34324	28484	14868	9645	22277	21653	7295	21602	494	18109	24463	30759	12645	25809	25332	32063	28877	33607	15349	29159	24269	23666
34:31:02	34.5172	17471	17396	23163	21391	16501	19568	5974	11759	21265	14290	13193	9092	22125	12818	17294	19383	9274	25594	22581	28662	21214	18501	22801	11662	23016	40067	30552	28539	15856	10708	19480	21370	7700	22214	498	15518	26535	22682	9771	25894	23134	29742	28860	26944	20965	29109	28370	18682
35:01:03	35.0175	18784	15370	16130	13999	17012	17083	4244	21872	23877	13611	29231	13661	30219	18893	16615	22687	12742	26168	21847	29240	12387	21286	21763	12083	25408	29700	49251	28214	14484	12117	26138	26725	6822	24446	586	25936	26872	29497	8733	29860	30632	31176	39333	35430	19379	31864	25936	23581
35:31:04	35.5178	30181	17155	18771	13325	20990	25661	34303	18163	21455	17535	27708	11822	29662	17594	15180	19995	12269	26531	27488	28940	15746	22636	17201	14510	28860	27404	44199	33392	14594	10636	21796	23210	9438	23556	624	32991	31544	31172	6151	27235	34953	28206	29020	35240	18653	30126	38443	26320
36:01:05	36.0181	24509	17387	21395	14337	22425	28472	23531	22024	33215	14805	27185	14902	16294	10079	20509	22062	11683	24311	22767	30185	17206	25341	19809	15476	36244	24484	37000	27505	13387	10949	27349	23657	10025	23239	586	26763	30472	32122	24961	28986	36240	28404	31206	33497	13737	39557	27881	23168
36:31:06	36.5183	28548	17952	29206	23193	22784	33143	21075	18640	35244	37903	41165	12624	25412	17282	23902	33269	11067	21788	24809	32763	24948	25142	23404	17531	26995	22417	51677	31666	16906	12531	23974	24995	8168	26307	637	24936	31527	27552	30121	22391	30273	35700	25113	34404	29683	35438	33075	20370
37:01:07	37.0186	39620	32079	21130	21708	29324	38042	25965	18353	42874	26695	41587	10138	31168	19476	33067	27919	20298	31425	29763	41675	41346	28079	21632	21653	30670	14965	46136	35734	17277	14088	22919	26653	10109	29079	688	19396	32611	40135	33742	26185	24050	36025	33847	28320	36206	26834	32231	34708
37:31:08	37.5189	28488	25927	34189	23138	27231	39059	40650	21611	47195	41730	46098	20682	49444	26535	22349	34843	12564	29889	37240	37341	28535	37882	26117	20805	44574	40371	54956	33046	16104	14033	24636	30109	7995	23830	650	17657	29147	41241	25784	31818	36970	41675	31472	41802	34869	29691	33164	21547
38:01:09	38.0192	19130	49237	30392	26818	30894	41553	32193	17923	30569	27961	46380	15936	42388	24311	20999	26341	13501	32143	33582	36388	32894	29337	27003	19526	52090	38561	56344	39321	17336	25130	21311	31860	12594	29231	650	23109	30493	37987	32240	47908	40355	36434	35194	37709	33058	43883	30468	34058
38:31:09	38.5192	45697	38759	31902	30683	34683	46216	37898	21864	27518	41460	49423	16522	30425	27763	21391	32328	21940	38856	30434	44498	30117	31020	28269	19467	59429	39308	51419	35206	20687	24889	18147	39468	10362	24915	768	28923	30877	36692	31143	38181	28526	44688	55104	46157	29202	45718	40688	27830
39:01:10	39.0194	44119	38962	34472	29341	28822	44646	35329	21193	45106	38240	47018	15915	48225	22041	20843	33831	20307	37434	46591	45452	30577	35160	30202	27463	67664	30830	50752	59058	20640	29902	17779	20775	12370	29974	873	24666	30780	32548	31484	43536	32151	39308	36227	41874	25079	46182	39451	31666
39:31:11	39.5197	43325	44169	41945	25754	33649	42899	48934	28628	46933	43511	44228	21252	46064	21180	20902	37856	20433	51858	50533	36594	35122	34328	22239	21075	46853	46153	57534	47288	16088	30100	17298	15366	14438	34848	810	40591	36101	37818	30299	39548	49246	44827	59282	46988	33818	49217	23286	33611
40:01:12	40.02	46009	43709	29775	29278	31455	44832	43232	29261	42135	44106	52934	16982	60185	27126	21969	32982	18851	44562	42224	47706	34485	39654	22636	29024	60240	39700	68170	45389	17379	23396	39456	11640	11725	35966	835	31818	33696	35670	39207	56467	33687	41506	48009	46710	33383	39050	32936	36742
40:31:13	40.5203	32067	54774	20488	30594	33354	50719	39232	34949	45452	32160	45807	29408	55458	24851	30784	42599	30459	47828	39354	44085	35590	41148	35337	28932	69774	22476	66304	48782	21699	27045	29375	20805	12476	32569	793	37645	37025	46731	34362	41346	36683	51875	39633	60468	27661	36751	40160	33691
41:01:14	41.0206	41861	42110	15944	31417	36632	59176	50495	14522	54285	22256	44076	26269	57370	35502	25349	39789	21353	45895	44684	40658	40089	39645	31349	30645	63321	45482	69153	32206	20868	34789	26079	47507	19075	31198	890	27400	34860	45102	27742	44443	44967	39620	39363	45553	50799	42144	42566	44984
41:31:15	41.5208	47706	49238	12159	25349	37709	50086	43161	8514	55665	50508	43389	47153	36995	32050	29531	40865	21206	52930	45271	45747	37966	40418	34890	28809	76544	42937	72314	37076	21467	22594	27467	38557	17965	38245	810	25269	28906	41852	24151	45401	45406	41768	36696	56272	34607	54906	39506	31721
42:01:16	42.0211	36434	53225	8278	31383	38882	45397	41654	22488	53230	45186	56399	24446	61176	33831	34788	38299	22632	54462	35957	42983	41608	45705	30130	30632	83880	31299	69119	28898	21096	27940	25438	28683	12919	48073	764	21505	35578	34700	19986	48828	45958	42667	42958	43853	32582	37312	45900	29657
42:31:17	42.5214	42962	37654	21691	30079	35607	52297	41084	42646	51934	53601	48267	19100	57994	26636	28176	47524	18121	49993	50449	50778	38831	43021	30645	24889	71648	32928	65533	58024	20488	15556	32354	29442	16607	42764	1059	29324	29999	52905	27953	45895	45490	34417	36371	42528	23543	43663	37367	40852
43:01:18	43.0217	38531	33843	20725	24746	42355	54812	34907	32915	53272	48178	37848	34552	56450	33864	25695	42068	20767	49343	41253	48009	35286	42089	26467	33354	72040	41789	60058	52234	20096	30611	30489	44034	13396	41718	873	31168	25282	45034	32919	42055	31413	30058	49803	43697	26725	45444	34345	34147
43:31:19	43.5219	35675	51457	28894	30860	33459	65122	25881	20383	58256	50065	48697	33628	60261	29037	27366	36561	20674	45558	42739	50917	41987	49284	25071	30759	65865	48858	71289	38721	16265	25189	38059	33582	17746	35459	865	27636	29927	39380	34620	46933	26012	34430	36768	31122	25915	50711	40316	41114
44:01:20	44.0222	37611	38924	31387	29286	30387	48959	45275	33193	37464	35620	48178	22417	43000	20493	28526	40730	22016	43237	42507	53888	38025	44114	37519	22526	73716	45554	58045	50609	21792	28472	36029	42743	11392	43823	823	20024	29438	44937	34734	39236	22581	31970	34949	24699	33552	38797	34746	24193
44:31:21	44.5225	44600	48111	35122	26396	29999	51056	53280	21666	43545	54918	65950	16446	56066	29687	31750	41637	22539	40983	34987	39050	35527	41169	25953	23345	55289	40430	99987	25539	27214	20066	25577	29809	14231	32122	865	39768	27379	42363	28045	42034	28324	30944	25957	58294	29282	29860	21277	27269
45:01:21	45.0225	41726	38582	19012	21282	35291	50723	40262	32598	43422	37392	42393	16666	43308	27965	43291	36194	20944	50111	43139	48786	33307	37797	18687	28138	61641	29940	62443	33788	31468	17881	26218	40338	11915	30556	738	29961	22923	43291	25653	63696	23121	32029	17172	59564	19712	29442	27315	16906
45:31:22	45.5228	30328	35548	19653	27645	22796	26400	42304	38190	37506	35497	47448	35291	38595	22982	30915	26168	16611	37194	36413	47262	35780	36367	19273	27050	67562	43262	62591	60324	20463	23957	19505	31020	10320	25463	814	33312	33755	36164	19843	40084	50267	36105	21607	30771	19552	39738	54559	23839
46:01:23	46.0231	32615	29096	18016	25045	30341	40181	41460	15674	37151	34898	38996	24345	43152	26607	32636	18948	18619	43849	37738	39717	31780	38861	18682	21733	58239	41304	56804	28653	22990	13556	19754	29826	13290	31510	844	30387	33793	38721	17104	45629	39502	32147	52200	23569	23282	33653	51744	27315
46:31:24	46.5233	32746	31548	17535	21978	27155	41245	25374	17147	28797	31679	27168	18792	39747	21733	30442	26134	15569	36067	33193	37059	25041	34734	16362	19965	61801	29953	49946	39882	18315	20522	37894	18235	9852	24290	764	29611	24358	33438	13632	35856	31987	26788	32598	22742	20779	34523	28746	21716
47:01:25	47.0236	23995	19674	16138	25012	21990	39333	16020	32919	32721	34244	30463	21421	37654	18142	35312	32231	21265	34358	29138	40506	30058	33831	16045	29105	48731	22109	47241	29978	18881	15277	20324	29062	7755	26366	599	27932	23522	29645	10016	32539	34831	25438	28054	50385	23324	31383	19598	14526
47:31:26	47.5239	35974	23982	11775	19125	23628	35738	13628	23767	24978	30240	31792	16868	39329	23644	30678	25189	18990	40532	19071	36586	32139	28986	22978	21159	54061	28788	37527	21248	20877	18763	19307	24450	6603	21910	544	22720	20497	22277	5324	45250	21417	32198	23628	39059	18784	25337	13653	13843
48:01:27	48.0242	19345	12725	15564	16180	21826	26611	27856	14927	27944	28117	20484	21581	34932	18206	22425	25083	17303	26965	15961	28573	18822	24062	17282	13472	42819	23484	39046	39675	15096	16066	17020	18590	6489	26185	553	21497	23712	29839	33316	34455	17071	21965	28784	21649	16286	26328	13851	25569
48:31:28	48.5244	20535	16404	15720	11602	24311	33206	16396	8919	29548	23206	21509	13721	26282	11252	26902	24142	16383	20109	19855	27332	11451	23433	12476	12493	45680	35856	44174	19104	19860	14585	27662	18640	14573	26240	548	27354	26239	20568	24927	26147	15239	19999	27083	36991	17585	30379	20729	16252
49:01:29	49.0247	15218	20767	11683	10771	19054	35510	40000	23168	24147	38730	26640	10345	27071	10543	14704	22678	18488	17050	20379	28729	10341	31982	13088	11797	37164	26054	34780	15353	16602	11674	32885	22328	16864	18315	451	21581	19163	30868	9548	29957	27898	16872	13640	39899	17307	23927	15370	14400
49:31:30	49.525	15155	29628	12467	10476	14045	34788	22666	21564	20767	22303	22223	9738	23218	11632	13590	26028	11193	20180	25277	32409	6961	33586	12168	12341	33987	43891	36624	36704	10995	15729	25590	12822	11003	16168	418	23560	24442	25206	6974	25028	24691	20948	28961	33594	12965	19476	18185	14024
50:01:31	50.0253	25607	40135	14577	14564	13910	32657	12712	22151	24649	20003	30054	13687	16775	12164	19978	19235	10202	24050	20775	23383	13446	28227	8421	12573	33350	27126	35455	22050	18847	13008	17197	11261	10446	15872	397	28754	20180	19792	4966	25370	34202	24493	22720	30792	13801	11725	18606	11750
50:31:31	50.5253	25421	40029	11543	13083	14269	29206	35708	27607	22033	22758	24239	13252	22455	11404	24320	22531	15657	19189	23902	19779	13067	20872	8105	15315	31679	27147	30054	33084	14687	11505	23446	22277	6324	19020	460	23442	19050	24007	4055	22421	24277	17758	30489	27210	17324	15218	25075	14894
51:01:32	51.0256	22509	28548	9759	16915	11219	26404	21336	25898	17134	19779	28548	14159	16978	11982	21978	15619	9324	29523	14674	18480	10776	19218	7354	11261	25742	29527	33628	17931	16252	10590	14843	28008	7759	17792	494	18661	13560	22788	4329	25716	22463	15185	30970	24847	15273	12227	24699	18775
51:31:33	51.5258	23020	28252	9919	13303	14117	26379	26180	19851	21358	14193	22670	13459	16210	11455	17543	15733	6459	21813	21408	20092	8181	15104	6371	11029	24446	24387	25037	17919	7603	8717	26294	17615	7231	17716	426	17290	11138	22784	28071	24353	36122	16446	24830	23096	15172	10476	15885	28472
52:01:34	52.0261	19438	23813	8598	12944	11324	22425	21353	18952	17872	17324	24674	8451	13796	13796	10999	19223	7223	24324	12278	12320	8274	14252	5658	10046	24341	22598	28341	23320	13193	9506	14387	21978	7928	12514	338	13763	8615	21556	23619	21531	22379	18678	16235	25780	14029	10594	12252	21345
52:31:35	52.5264	16674	18839	9961	13240	11100	22754	13130	18952	15763	26185	21442	6578	20244	12202	16552	24619	5924	19252	12894	11193	8780	11889	7109	12421	24155	26864	27830	24256	9894	6367	18957	25780	7307	16176	401	16885	9400	23767	16463	19012	26151	15109	26691	13273	10543	10058	12067	11856
53:01:36	53.0267	22033	22307	9210	9868	10619	19729	18961	17037	17746	13957	20868	5523	10362	8814	12864	14362	6594	18615	16813	14434	7561	12425	7362	11062	21847	24240	27560	20180	11100	10235	14501	16982	6472	15113	329	13265	9881	18463	12193	21324	16978	16948	18661	22480	9560	9303	9636	15927
53:31:37	53.5269	17725	21539	11303	7164	11185	19995	29978	20687	16923	25417	19644	4371	14311	11383	10843	11328	6206	16100	16969	12721	8868	12877	7539	11809	19104	19902	19003	18775	7409	4970	16691	23982	6493	13944	392	15893	9581	18767	20484	19227	17007	19231	17902	13556	10020	9539	13910	15969
54:01:38	54.0272	16965	20113	8409	11037	11991	19244	14434	13767	14501	14155	11290	3557	14100	8058	11147	13100	4717	14611	12598	13691	10569	13995	5443	10413	21817	17020	20649	14805	9400	10598	12337	15666	5860	13484	316	11999	9455	18923	16261	21121	29025	25168	10759	19817	11168	9501	21758	11480
54:31:39	54.5275	10919	13678	6455	9754	11147	16657	18817	15121	15784	10750	18653	8366	12206	9632	9923	13193	5071	14661	12256	11033	13210	12725	5362	9611	20877	20206	20826	19088	5687	6101	21058	29953	5468	15138	308	8172	11767	18125	12699	17725	22231	19712	21674	16847	7434	8539	13864	13729
55:01:40	55.0278	8902	12805	6949	13164	11835	9324	15028	7383	13898	11754	14286	12105	11885	7738	9278	11771	5907	16239	7767	14927	11079	10754	5645	8501	19927	18142	24547	22615	5156	7050	10915	15455	6253	9134	371	10489	10383	19087	9189	24054	17075	17792	18033	14695	7198	10387	17539	15282
55:31:41	55.5281	17298	14391	9101	8860	12590	14370	6388	3485	16096	12176	15699	9383	14050	11269	11362	12674	9484	16096	12138	10096	8383	11906	7215	10231	26961	15096	23223	15569	7219	3561	14290	19282	4666	13531	333	9497	12151	15282	13931	15037	19455	19277	18682	12273	7375	15493	12560	8168
56:01:42	56.0283	16104	15400	6172	6409	14438	10729	3700	10020	15104	13522	16324	6379	11978	7383	8763	9058	5738	13965	11459	9759	8894	11974	6405	8202	16872	19944	19172	20864	5189	6788	18438	11636	7054	9978	354	8776	12003	18564	14636	12096	15834	21906	20341	19509	8354	12700	20868	13510
56:31:43	56.5286	17442	15746	12126	11940	13088	15434	4038	7438	16898	12404	19387	6143	11358	7911	11645	12349	7088	16687	9856	9809	8738	15809	5721	10704	15332	14113	19497	8451	7527	8809	18172	15695	6080	12446	325	8687	11197	18514	11640	17860	9404	19062	14531	19539	10143	8704	13666	10932
57:01:44	57.0289	14585	18809	15615	10889	14564	15531	2548	16986	19062	13261	9754	3962	11383	9362	9577	11088	10712	20606	8560	10641	8582	12898	6885	9172	20556	11868	20957	15164	5173	6890	8168	13286	6578	12699	283	9657	11754	15822	8185	16750	20560	20501	10653	13214	10164	12982	11282	8312
57:31:45	57.5292	16505	26902	12062	6839	15480	21632	12826	17007	18661	13164	16868	6312	13240	8928	12729	11560	7961	18366	9138	9733	11645	14438	9641	7949	23374	16809	22716	12746	6544	6725	9476	13273	6088	9446	278	12126	13712	20480	6556	16687	13311	15227	8202	8366	14033	12543	7755	16024
58:01:46	58.0294	15826	18649	12560	12261	17594	12742	22729	13130	18155	16193	20526	9733	13029	10046	10501	16412	8911	16784	14277	10932	11581	19577	14573	11805	17986	28100	20159	12033	8046	9801	16767	12075	7725	11396	325	9641	11168	18602	3941	17054	15763	24581	20606	11906	13088	8387	21117	12953
58:31:47	58.5297	11303	12067	16792	12839	20054	15092	16826	6831	16556	14130	13155	9160	18290	18320	9628	16033	9501	14826	12628	12168	11746	19417	11299	11168	31691	16450	21780	10885	11569	6586	8514	11957	8164	8586	270	10096	11294	16332	16079	23788	27965	18720	24957	26885	12611	11784	12725	11311
59:01:48	59.03	11531	9003	17505	13712	17927	17197	9214	13594	15518	11543	12543	13476	19661	15218	13872	12577	9767	17168	11543	12898	14277	19180	9987	10214	30944	21733	14223	15674	9324	8177	13303	11995	8307	9995	304	9375	14332	18940	18315	21733	18290	16324	14493	23758	10197	14615	14480	8101
59:31:49	59.5303	15999	6907	12303	11552	18218	22923	26729	19868	13657	14796	14805	7961	13953	13278	13231	13497	9619	24915	12193	16193	11552	17075	13522	12366	24978	18472	19974	10712	10278	7805	10674	14075	7746	13332	266	10012	18163	21370	15227	22699	16408	18796	13088	22775	12265	9995	14265	7527
60:01:50	60.0306	19569	17396	21644	13294	16353	17277	23180	14117	18113	8822	15733	12518	14986	13733	13602	16948	13636	16564	12058	18940	9970	19066	15982	11016	23294	19125	22704	14501	11067	7607	8949	11813	11008	10235	270	7295	18569	19839	12531	18590	17535	14923	14311	21092	8117	10940	15117	10590
60:31:50	60.5306	24286	34303	24438	13142	19488	21134	20033	16037	21180	16201	25961	9164	14058	16037	12294	18805	10126	30408	13231	16868	14024	20007	16704	16936	27396	20864	21248	16560	9898	8535	10560	16678	7586	9619	384	12999	17602	30949	14138	17214	32185	22767	13438	23564	20488	7459	11522	9185
61:01:51	61.0308	24345	32784	22320	18851	23332	22695	26564	15336	23066	15649	30109	6670	23408	16978	18442	19615	13834	20387	18412	25856	18661	23434	15358	22248	21501	18007	25062	18109	10780	12864	12501	19552	10257	16408	401	16332	17822	22290	20914	26708	22906	27273	22611	23691	17471	15045	13822	11552
61:31:52	61.5311	28843	33092	22024	25518	21577	26809	32303	18147	25138	19387	33371	6286	28936	19910	20965	20649	14016	30847	15201	23484	21712	19868	19750	21720	32949	16830	26758	26699	10303	10957	12535	23341	7253	17147	548	14585	17315	19585	23353	23514	19547	24547	20201	26425	17092	15666	23109	21699
62:01:53	62.0314	34641	34134	24737	20539	19974	29716	41249	20037	26522	21079	31919	6472	27159	19805	16341	22564	13472	27847	13273	23294	26227	20522	20180	22282	34907	24927	27493	35725	12628	10543	11792	24889	9324	14801	519	12830	19518	16442	22767	19986	15953	26826	22598	28695	18290	20041	27999	23269
62:31:54	62.5317	30624	43232	27079	20940	25383	30413	39135	23328	30316	29396	35746	22075	25594	22796	15889	33949	20349	29214	16176	21260	23775	29501	22341	22248	25109	17412	27202	30337	14185	12075	17261	14256	13771	16480	506	14218	18936	29206	22792	27598	18239	29088	26510	33674	20560	18716	26012	14248
63:01:55	63.0319	34337	35455	16632	25003	27581	37628	18509	24446	29974	29147	40515	22277	35599	23058	23345	27168	19429	27412	21948	24750	26235	28632	17138	24404	20872	16370	28991	35447	17906	12999	19834	23480	14881	21573	523	14450	21720	30594	28695	26391	23505	29636	26180	34936	22817	18948	26687	17602
63:31:56	63.5322	34143	43612	23792	26071	27636	33468	22725	19463	43431	31024	31953	20666	41409	23851	27109	23661	17248	32636	16556	25602	23704	23615	21885	23834	16720	36806	32480	42089	14332	12020	13244	22801	16391	20779	612	14847	25408	38325	26387	33497	18147	31514	24286	34565	14387	26151	19509	23345
64:01:57	64.0325	39131	67402	28202	25518	29961	34814	20902	32818	32506	27590	38071	17277	39029	27033	21539	29948	13142	32421	24012	31084	29012	26649	26450	22864	44477	34181	37135	49854	11396	10611	14218	14834	14763	20345	544	14083	26645	31489	23252	29193	18497	27054	22193	28860	26940	23573	19965	27531
64:31:58	64.5328	25353	45182	31847	39072	28003	36713	17256	30792	37409	21467	35624	16893	42405	26003	23185	36388	31721	29227	19328	34084	25666	27104	18425	24303	44351	27345	43912	24611	8358	17290	22007	10864	8944	21708	624	10826	26661	37785	29632	31278	16961	22885	25147	51694	21113	25463	25037	24488
65:01:59	65.0331	34704	43604	30400	24737	33944	40565	8252	16210	46123	16708	38274	20197	38266	27240	33299	30256	27839	32843	25906	31999	25425	31210	26991	23560	59628	25286	38717	36991	15780	11202	23294	13210	14197	25611	608	17408	31151	40587	23349	26931	33776	27117	21379	34717	17277	18404	35506	24239
65:32:00	65.5333	42232	42300	35379	27704	26910	38080	5265	9003	33966	14379	47533	18666	48208	33582	26923	31054	24750	32501	23117	30995	25142	32691	23396	32409	62899	39983	36160	38768	14615	11881	22754	27716	19235	30227	747	19480	24307	37202	21535	32949	57944	28712	32687	34953	31025	35797	29320	23535
66:02:01	66.0336	35738	44929	28995	29489	37130	35894	5303	23467	29417	35696	44059	16902	44511	30269	26050	34219	22041	35185	22172	38725	29307	33928	24151	21463	62726	40481	32535	45457	13957	12619	16535	21501	19733	28649	502	14548	23750	39810	17374	38169	34755	28594	24598	30780	23704	31805	23037	18944
66:32:02	66.5339	24028	52103	34016	26286	30134	39996	4873	34109	32265	30771	34763	21497	40996	28193	26138	39270	29737	38920	29218	36413	30075	41688	20632	22282	68440	33286	49272	39076	11594	19957	18754	43406	17370	24294	624	20640	20661	41084	15214	45739	39122	34151	25893	26088	24244	26421	16581	29290
67:02:03	67.0342	18767	48655	32695	21699	34535	40565	4957	22986	33582	34759	35215	18805	52951	27737	26708	32434	30392	30565	34573	38413	32953	35345	24602	25024	57999	31459	34113	35742	14556	14754	18779	24978	13526	27244	515	18889	29113	38747	15522	34426	33839	34932	30527	32130	15320	16695	11354	22535
67:32:04	67.5344	38852	36181	33907	25467	30033	44313	37911	25817	33122	31763	45102	18324	43899	28130	27476	40089	25045	26704	40321	29493	26362	33164	35687	34147	61312	27666	35367	31387	14058	14442	14459	27995	13919	25716	557	31349	24547	38161	10628	45153	43806	48128	36493	39502	27796	14750	10446	21535
68:02:05	68.0347	33679	51238	29763	25412	29729	39038	35088	14522	20531	40540	40928	11733	40506	30472	20543	37953	21708	39439	24121	34848	24526	32771	34700	25839	50710	34333	35805	41886	16691	17484	30333	25687	18725	20893	548	24602	25189	37000	10999	30008	31733	28915	27763	38810	26366	19746	18235	23083
68:32:06	68.535	34772	40042	30510	30345	29143	35139	41587	8805	39160	44186	38337	19303	43629	26223	20940	35071	26484	31957	26159	37173	30130	34890	32286	29526	53724	36076	35894	41000	20531	12299	27548	22885	21374	17379	789	19775	26366	33333	10598	33814	28307	37080	30645	42853	20834	47777	39173	33059
69:02:07	69.0353	37886	51584	34168	28792	35995	32822	19944	19758	37974	27881	37067	20286	49022	34371	13864	25910	28252	33683	29560	35814	29569	30539	29619	21952	34594	30117	38447	34168	16256	10581	20957	20725	11286	24645	667	24374	21910	32826	8168	33029	22290	27370	26299	39569	33776	21130	30632	17518
69:32:08	69.5356	36945	34084	30961	23033	24843	17400	29700	26193	37341	29218	41831	26024	40477	28151	26079	23130	23885	35586	22699	44110	29024	33552	26003	24358	51360	27366	35118	42161	20256	21813	16450	29151	16155	38962	743	21045	24501	28889	7987	36481	19012	27784	22784	26244	26058	22244	36974	28248
70:02:09	70.0358	30944	32902	30780	19130	28189	40173	19417	18028	33873	27974	35480	18159	31594	23864	20914	30894	18974	30636	22104	28683	32282	26720	24636	25505	47313	29324	24050	28695	21476	12784	15193	28932	14045	20041	646	17813	28632	31738	36789	34337	38341	28569	31164	38384	19294	18193	27775	18602
70:32:10	70.5361	27805	35257	29607	24012	29919	38278	32611	8978	30906	26130	33404	16012	37455	26020	21649	30822	11214	29687	18227	33721	24239	25995	22463	24682	47220	30611	27261	30316	15716	13868	26311	33118	11155	17763	506	12501	21222	33949	34063	26501	37173	28889	34826	29864	14256	19379	20889	28332
71:02:11	71.0364	18763	36000	21421	22265	25277	27834	12632	5822	34438	31472	20235	15855	50423	22328	19851	22552	23463	22644	22568	25957	22417	28396	26978	25509	53783	33582	30020	38557	10860	13586	16341	27607	14974	20256	713	25826	18801	29269	24117	28282	32869	31632	26872	21644	17463	18480	33573	15197
71:32:12	71.5367	17851	37523	28341	21366	18834	33189	33995	24594	34223	23796	30227	8400	33046	32687	14796	21455	17974	19961	19564	14037	27029	50398	23429	21282	48010	34780	26497	27476	6202	14332	16336	16885	9282	17674	532	21737	20142	21556	18598	24408	24742	25602	22696	32269	18185	16936	28851	12176
72:02:13	72.0369	22493	38869	24640	17594	18881	33282	23374	27117	27910	25248	27995	21910	38455	29678	13282	24636	21754	25231	20695	26383	26375	22969	21699	22353	37295	24619	23742	34742	16953	12872	11999	20252	21712	21282	473	15412	17547	26923	12868	28067	21374	28624	24256	30889	13159	17518	18087	14185
72:32:14	72.5372	30982	33176	22674	20590	19813	36337	31071	23083	25725	25041	29531	13830	29176	27231	11328	27932	26674	20906	19471	33058	18134	29581	22872	25514	28130	17818	22590	24374	18712	10349	15412	19725	8480	17142	502	13370	19636	27286	8278	53251	19834	31008	25058	28197	10155	15957	27062	18695
73:02:15	73.0375	36683	30189	20834	16910	15695	31421	24003	22784	31345	20421	28674	13510	25197	17514	20345	16543	23062	24130	17746	26750	27311	26564	27062	21214	37818	24746	20978	27324	14033	12459	11843	21455	13636	14332	468	17999	20214	26328	7662	24995	21737	25893	21699	23864	18860	12472	19889	28974
73:32:15	73.5375	24033	37139	22619	17058	12235	27294	9413	23391	20695	20881	27877	12805	36962	24632	17982	19893	30160	21147	18822	23484	18012	22906	19725	16573	30489	21083	23737	25535	18682	11278	18104	19957	18623	15906	591	19855	16581	19071	19421	37502	25151	29970	20995	23016	18218	14598	27218	17345
74:02:16	74.0378	19450	26585	22353	14269	12986	27661	21619	19147	21526	14358	35114	14345	26775	21931	17058	17100	15045	23041	16016	20438	20429	20547	18839	24463	24387	18298	25746	27223	11974	10632	20484	18387	16353	16505	540	14535	18569	23471	23260	32653	19944	20058	19121	22320	16269	12910	22286	20632
74:32:17	74.5381	22682	35839	19606	19455	11721	23636	51090	10678	21087	20058	19362	9750	26265	17611	12404	12362	18159	13885	19877	24864	20556	19168	19725	15915	31176	21045	21273	21708	9974	17788	21767	22535	10776	14400	540	16712	17830	25248	16476	22163	14463	21817	17539	22037	9527	12510	21868	19438
75:02:18	75.0383	24902	33193	25336	14594	12012	20455	42642	23682	17839	16657	21847	12750	25117	18505	12252	18012	13286	15889	12822	18902	25944	19037	15632	16729	27130	20830	18628	16678	9497	12645	17552	23493	16130	12809	430	12729	17147	18345	13733	27678	23417	25003	13476	22915	12805	11459	19007	22801
75:32:19	75.5386	19421	27969	12231	11543	11484	31155	40679	17590	20024	13227	17142	12303	23822	12366	17986	17463	11704	17138	13303	18986	19269	15501	20758	17455	22914	17033	17716	17024	8695	9236	19066	19931	10683	14290	443	14927	14716	20185	14062	23223	23189	24159	9101	20087	14843	12248	23830	9548
76:02:20	76.0389	18223	27159	17822	8012	10505	20201	41105	22594	14358	10126	17307	10425	20965	12273	17104	14273	13737	12400	15746	14353	14100	17725	15256	15493	18320	11425	16547	17737	12324	8290	13999	23248	7704	9927	443	13311	11801	23678	9160	15223	27687	29421	6080	18471	9771	11417	22459	6421
76:32:21	76.5392	21750	24716	15320	6168	11147	19826	37903	13569	11345	7885	20227	9434	19687	13362	13303	12088	11434	16007	14657	17923	18872	15218	16628	14712	12467	8987	13117	14341	9054	6814	20193	18944	8683	10978	409	10459	17417	18104	6805	10708	16999	21412	5202	10944	10835	12265	31181	5173
77:02:22	77.0394	19206	15408	15206	11522	10193	19134	36738	13560	19619	6270	13543	7586	21049	12577	11235	10678	9231	12737	12868	15037	12489	11725	15252	12328	8008	5050	17218	14742	6856	5628	14784	17311	7151	11320	397	12970	15514	20012	5076	17391	17239	12151	4527	13450	11050	17028	15379	19539
77:32:23	77.5397	11889	10134	13877	12375	10400	20910	31100	16248	16864	17560	7742	4620	13881	12805	9632	17737	11223	16189	10033	14455	11919	11746	12265	12868	21678	3772	14480	16965	4860	5447	13742	11581	6143	17982	418	11088	10020	15104	5459	19442	9906	10628	22729	19602	8991	11396	12649	20704
78:02:24	78.04	13619	6400	15071	9641	9733	21573	36194	15180	14864	17657	5384	3721	14995	9961	12923	16661	8679	12906	12311	15020	11366	15978	10999	11737	22741	15235	14818	19223	4004	10662	16864	16632	8809	9501	333	8459	14834	14661	4898	16024	7316	11244	17320	18678	6729	8607	6594	15189
78:32:25	78.5403	14265	21644	10801	8231	11556	14315	24379	12429	10362	11434	6489	9577	14898	9788	11624	12332	11657	13843	13661	14147	13282	11910	11944	18910	28505	23071	12678	12683	11155	10505	12366	14864	7016	9919	375	9396	16383	16476	5493	16539	5021	6679	17556	12265	5746	7075	16277	12797
79:02:26	79.0406	13961	23615	11227	11569	12518	17712	13067	7198	15142	10252	14725	10096	13467	10210	11421	8202	10227	14353	13328	13071	10366	14075	12598	10168	23927	17155	18088	14716	10134	7658	12451	13632	6198	8274	363	7253	14856	16915	3995	12332	3704	15961	11746	8560	6902	11999	18619	18210
79:32:27	79.5408	10813	14235	11822	10117	15206	18931	18033	8459	15387	9484	16758	6923	17564	8396	14109	5493	9092	12801	12400	6983	9497	9594	13923	11868	21746	15062	18332	13657	8556	12442	13847	14446	8058	12358	312	7852	14813	15290	19417	10763	16539	18763	7303	6248	7278	8518	19471	9071
80:02:28	80.0411	13282	12303	10535	13522	9413	13767	8982	12602	16446	10109	15771	5818	13569	7172	9088	14969	12273	12172	8788	11961	8999	9117	10792	9949	17497	14670	16758	10468	7193	8430	13877	9598	10396	10771	338	6961	10885	16978	14488	7442	24138	16860	14615	18488	7615	12902	16201	4658
80:32:29	80.5414	14256	29130	10923	9598	10653	7012	13455	10843	17446	9113	17092	3455	15577	7624	8071	17231	9911	10835	9117	12742	6485	10818	12442	9413	21990	12138	18121	26345	9425	9468	17109	21058	9881	10088	274	4797	13974	19286	12493	24488	22539	19147	18176	26265	5670	9539	14151	3620
81:02:30	81.0417	9210	15320	12788	9008	11527	16311	15746	12299	18590	7856	15552	3371	14450	8594	9358	12704	9957	10949	8818	15041	11489	10898	10092	9932	19910	13387	16547	21117	7303	13687	11653	21510	5573	6797	375	5818	10712	20455	9864	16695	15062	17809	20581	12126	7700	13105	19695	9501
81:32:31	81.5419	15910	9653	13096	10067	12252	16362	4033	11801	19062	6582	17442	2679	14552	7210	8054	12113	10257	12041	10176	12906	9712	10189	13932	11602	20007	11535	18606	14919	8586	8868	9911	17299	8978	15066	426	8535	12573	14400	9446	18387	15417	17725	21488	16362	5978	8966	21062	16792
82:02:32	82.0422	10712	17851	18269	12358	11096	10624	2742	11957	15235	5088	21581	2173	12012	7847	8261	10577	7333	13915	9223	13834	10662	8151	14155	9957	23952	15071	13311	16197	6611	16910	8641	16100	10151	13940	312	8894	10434	15180	7392	21885	16320	18286	19834	21261	11172	18531	16552	15501
82:32:33	82.5425	10126	15252	15244	8257	10282	6708	20763	9674	14543	3329	15265	8919	13636	10577	8628	15737	6742	10172	11868	12265	9333	10636	11294	9046	23176	11936	17594	13885	10944	14699	12839	12265	6637	12046	329	6582	13594	17940	6139	9303	18687	20117	12978	16598	11231	10240	17438	19855
83:02:34	83.0428	11092	19826	9961	8544	11404	14742	16079	11873	13678	9544	11611	13801	12704	8860	9522	13586	7636	12657	10366	12130	13733	10767	14282	12742	21336	16130	13691	13429	8404	16248	9193	17007	4953	10223	342	8451	14961	12282	5270	18868	17514	15868	21193	16054	8590	15906	18223	13214
83:32:35	83.5431	9185	12632	14299	10632	10695	8295	14801	10269	15889	9328	17303	10480	17362	7539	8603	13016	10978	14303	10354	11463	12261	10771	13721	10054	19391	14366	17729	15611	7793	12134	15674	11822	15893	9738	367	7670	12421	14775	4105	14742	24438	19598	13594	17733	5489	11906	22282	14020
84:02:36	84.0433	15636	25197	13885	7953	10122	13881	13598	5468	15547	9847	16277	10358	15712	10231	7388	13940	9134	13176	11645	11957	11172	11927	11649	13332	18303	12970	28852	16088	8409	11759	14256	17299	9459	10594	329	6198	18079	19185	13294	17252	23607	21471	16801	18569	7544	13889	15324	13311
84:32:36	84.5433	13577	14944	13434	6067	12699	27463	15151	3835	17493	14303	10379	9957	16877	9974	10835	13472	9358	16463	12278	12712	14893	10484	17349	12619	21860	14754	25940	21552	11581	13379	9965	10117	6493	12902	350	8079	14387	17957	14434	16775	16585	23096	19290	20387	8063	11535	14518	7577
85:02:37	85.0436	15640	10307	15986	7485	14079	21699	21328	11219	15805	14020	10219	9965	9708	12045	13100	14324	11387	13915	21071	12429	12261	11480	17366	10219	19526	13438	22683	22539	12640	14488	14100	17809	5324	11122	283	7054	16931	16817	14780	13286	22087	20796	17716	18729	8662	12510	12889	6202
85:32:38	85.5439	16484	24644	17387	8780	11223	10830	18223	14780	16488	12121	16168	9552	15016	11413	11362	14315	8219	11159	11771	16923	9337	14062	19771	10763	20742	15075	19779	17277	10809	12982	9041	13978	14661	14370	312	4915	13666	22206	14328	15088	17201	18763	18421	17341	7223	13965	8615	15412
86:02:39	86.0442	18885	15509	12999	6915	16526	27341	20611	10392	22130	15666	20358	7193	14126	10273	11299	17227	8366	12615	11404	15784	7814	13459	18214	16910	22695	12446	23109	19079	9590	11518	14261	23421	11248	12801	371	10138	15708	15484	13915	18632	18020	21801	20130	21421	8236	13282	9788	16872
86:32:40	86.5444	19071	17872	14227	7835	18007	22185	20429	14286	19636	15155	25206	9354	13915	10408	10919	18919	14691	14674	16400	18826	8746	18670	17505	12176	21543	11674	28872	19176	9965	9096	11560	23552	9240	15155	426	8797	16155	18969	17054	17619	21463	18682	29619	17054	11463	12383	19087	17244
87:02:41	87.0447	20147	24172	15953	11548	15915	22168	15197	14594	18526	18476	20514	6548	20320	11084	12602	15066	15033	15830	11940	15142	15151	16910	21480	15054	19412	18315	22729	17396	10105	12353	16754	22649	13826	13721	468	9189	15379	17746	14813	22585	20649	21239	19952	13581	11484	14041	23028	13058
87:32:42	87.545	22531	31058	15733	9708	19488	23370	23484	14176	20805	16130	22569	12953	25590	12345	12172	15113	15151	14936	12391	19687	16758	15670	17569	15860	19189	16239	24277	21033	12497	12501	19877	23788	10092	12193	460	8485	15974	27105	14214	17501	18636	20265	18497	9548	12417	15328	15020	12691
88:02:43	88.0453	28159	17893	17868	11835	17628	23847	18239	13045	19577	16071	28526	9172	21054	14666	12362	18239	16720	16387	15649	17640	13037	16045	18045	19843	23944	13083	23822	22054	8590	10729	13906	25104	12687	16805	451	10974	13843	20805	13497	21370	23725	20045	16290	7809	9624	14041	19505	18201
88:32:44	88.5456	20674	26501	14472	9915	19695	23522	11624	22919	18754	15885	26037	6113	21476	13353	12750	17914	13708	11868	15990	19585	12172	16412	15265	16121	25813	9417	28467	28522	12176	10337	12969	21919	12164	17180	494	12400	17822	20459	11071	37780	22999	23716	20332	21628	10455	11653	20185	17720
89:02:45	89.0458	19463	18623	16868	10210	18062	24290	20214	14547	17851	16151	25142	16012	23159	14100	11518	17893	13261	15075	14632	19058	15218	16037	8906	17497	29974	7164	28155	23708	14375	8877	9413	28480	12662	12214	481	8215	12965	21400	19159	18134	22201	21539	23092	24619	16227	14974	20286	15501
89:32:46	89.5461	19163	24796	19404	11594	20877	24615	30725	14324	16239	19573	25265	11008	20974	15957	15986	16117	16353	15336	15497	18948	14054	16189	7442	15509	26923	7413	35114	20332	14771	20623	9518	16518	21412	18096	481	7776	16674	19602	17940	17708	19476	21159	21020	28366	11767	18463	21712	15138
90:02:47	90.0464	24514	13894	15855	10463	19374	22999	23581	8847	18704	18100	26716	10873	22400	12661	15493	18771	13822	16012	18130	21201	15725	15666	20028	16687	32670	23147	45646	15961	13661	12564	10995	14379	10683	13636	523	16408	11961	19303	18750	20716	18881	21699	21142	23239	10514	16792	22801	13982
90:32:48	90.5467	21024	22927	8805	11054	21864	22514	27214	14488	17476	16083	20602	14729	19480	12965	15463	19978	15628	16720	14071	27708	15273	17374	21273	15041	24471	22585	33535	14168	15071	12079	24885	10261	14117	10826	485	11868	12813	17518	15155	26657	15180	23501	22155	23180	7763	15514	23273	15522
91:02:49	91.0469	20214	21087	6518	10982	22096	22754	31463	13687	19252	22623	29391	14737	21877	13535	13303	19130	18649	18328	15138	23577	15007	18193	12742	15168	17957	23455	31143	21927	11332	18286	18353	8185	13121	17379	494	20556	18016	19779	13488	20142	19142	19585	21611	24433	12126	19606	18488	15307
91:32:50	91.5472	22552	23425	5240	11016	20644	21666	27548	12459	20104	19720	28278	13796	19218	15889	13818	18121	13231	21581	18425	22231	13121	19531	16320	16383	23619	21071	29172	13050	9160	12868	16522	6029	15100	16332	548	14311	17092	17940	16817	18910	21168	20163	16505	21400	15813	16421	21805	18218
92:02:51	92.0475	24927	23919	16071	12699	22193	16927	25784	9029	25079	20767	20965	10084	25277	13851	15016	17231	13252	17855	16720	21087	13045	23442	23261	16079	43629	17573	30265	13978	12083	11657	9763	15746	9362	15193	489	12353	14100	19075	17358	15248	18282	29780	11539	22509	20822	13273	18885	16168
92:32:52	92.5478	20585	23518	16189	10067	22957	20235	24041	15463	21796	16054	27510	6160	20906	14104	13733	17303	16362	20071	14337	20632	15442	22290	21201	18079	30949	23476	30155	12240	17328	14560	21585	21564	7341	12092	485	19189	13733	24282	17712	16742	17396	24058	20741	24134	13142	11109	21438	17632
93:02:53	93.0481	15691	24412	19556	10227	18012	21459	23902	12408	20012	17708	22370	5054	23590	14096	14037	17438	14050	17737	18801	19497	14818	21125	21636	19269	26763	16353	27607	11712	11792	11387	14923	30864	10290	13299	603	20037	15370	21328	16066	9843	21054	21062	22961	20784	9729	13788	23611	11425
93:32:54	93.5483	18944	26986	21526	11278	20134	13121	19741	16497	20535	15619	23877	4375	21699	12746	17957	18518	14725	18033	13788	21438	13315	15109	20619	15020	18877	15370	24999	17986	8725	11826	10434	26995	14387	17117	565	17265	12775	19121	12185	16674	21999	22117	19560	22201	10767	15303	24514	15336
94:02:55	94.0486	19058	24742	18151	13096	19826	8143	24003	16480	20480	16134	23919	8046	21087	14109	15079	18552	12417	19581	10708	16678	7923	19341	17598	15311	18864	18467	21805	16028	5493	11214	8434	14767	14104	18185	456	13556	17277	15235	9400	22134	16931	19902	23058	23847	8447	15995	17674	17961
94:32:56	94.5489	22708	27805	22640	12729	17708	26666	24235	16598	19834	15999	23615	11936	20817	13552	14754	18594	15374	19577	16526	22307	14396	17750	20957	16547	17050	19349	21142	17450	4426	10172	8759	15400	9932	21362	578	18695	12311	26197	12189	23227	14716	20493	18666	21619	16328	15784	22222	14792
95:02:57	95.0492	19396	22518	21134	13244	15345	21885	24345	15708	19877	14324	24725	12518	22590	12303	14991	19374	14708	18969	18952	27661	12860	17847	18535	17556	23408	19100	19716	14927	19893	13505	10873	13383	6493	22299	494	16033	15990	19484	7468	19855	14421	27396	26885	17109	9265	21180	20729	11358
95:32:58	95.5494	18691	16733	19531	10716	18585	23809	24927	16501	22400	16543	23564	15345	19543	10780	17016	20611	12020	18881	18830	18045	13400	29729	18244	15332	31088	17725	22716	23813	13868	9409	9349	14877	4835	17041	523	15594	13134	20518	8409	24847	33430	20421	24742	24860	18100	15092	20674	17957
96:02:59	96.0497	22307	28830	20450	15855	17408	17007	30117	17767	21446	18163	16936	10155	17455	11986	13894	14227	12860	18336	16050	19273	15792	18185	15303	17421	30109	16104	19877	25784	11088	14315	18227	13408	10075	16758	489	16931	10489	19552	4725	14172	23286	21860	15678	24526	21919	13822	19822	10826
96:33:00	96.55	12396	19784	20227	11619	17716	24341	14159	16509	16780	12923	23944	6961	16839	12202	16455	17729	13294	29079	16834	20303	15476	20050	18927	19792	30543	16497	18623	27898	16509	11948	16615	11096	16176	20037	532	12775	10261	16915	3637	13742	22644	23003	13868	23189	13615	13273	20792	12429
97:03:00	97.05	15826	21467	23387	10915	16906	15986	18868	11733	16159	11105	20425	14058	16248	12370	13792	16695	12505	18805	14936	18640	13223	16590	16421	14733	23881	15725	16206	23396	16784	10244	13737	17877	8695	15007	426	11079	10273	16969	4320	13130	26358	20851	17176	20231	11016	12037	18210	12248
97:33:01	97.5503	16906	18307	20737	11792	14649	24374	16391	13391	16374	11100	22256	14526	15383	12560	17231	13851	16138	19125	16763	21328	14438	17531	17024	15978	25003	15737	27248	14020	12531	8999	16615	17969	12193	14252	418	15767	10754	24818	16670	23197	14923	24197	19936	18784	13476	12986	19353	17501
98:03:02	98.0506	12721	20163	15231	13729	14362	20269	14628	16294	16429	11349	25611	13746	15990	10455	11695	13408	13695	18054	15256	24695	13320	17784	15349	13058	23657	15855	15417	13923	12936	8261	18796	17598	10957	15396	489	16864	14999	15860	17682	23117	11940	21598	16940	18632	13197	9717	28472	20763
98:33:03	98.5508	18024	20944	18944	10088	19412	24003	17758	14784	16083	10417	19501	12868	15332	10062	12906	15438	13134	17016	12248	16644	10961	15855	19290	14573	23704	14126	16159	14940	13611	8995	16332	21965	10459	18628	574	13539	10497	15214	14434	21412	10278	16303	18484	16670	15130	9349	16653	14784
99:03:04	99.0511	18210	21801	14434	6662	14602	15417	15256	15016	13763	10328	18716	11527	15940	12480	12290	15780	12138	15484	13678	17805	13142	15514	10851	12130	17307	8885	17552	14872	9366	8257	18569	18012	7797	10214	367	17235	12121	15218	13742	20244	17615	18695	21750	18172	11429	11548	10792	9666
99:33:05	99.5514	14463	21214	17121	15180	12607	23066	22611	12514	8695	10025	19282	13974	14459	10337	12839	11214	11273	16969	12999	12805	11881	13645	11257	11379	21345	7358	13299	13155	9552	16805	18763	15024	5164	10657	430	12294	8877	17341	13683	18817	30269	17758	17298	12974	10442	8746	15256	11742
100:03:06	100.052	12172	18902	15400	12687	12155	22805	26206	14345	8822	9269	15695	13096	14573	12391	11759	18269	12290	17767	16172	14155	11657	13725	11843	10700	22640	17341	14742	11421	9657	8835	16767	15197	5999	8535	397	11894	10581	18948	13581	28362	25548	23518	18353	13488	9341	12147	15915	14206
100:33:07	100.552	15442	12029	16522	12839	10590	19910	11780	12683	14379	5506	17885	11054	16092	11252	13400	14142	10805	15509	13712	18847	11050	14628	11653	10354	20585	15328	16007	21168	8430	7632	12307	20737	11303	10324	422	11518	11404	16261	10885	21535	17666	15678	14337	15261	6915	6590	15699	14117
101:03:08	101.052	12383	8088	13661	11590	9763	15830	15075	11944	15990	3806	14408	8717	14974	10906	11847	13024	10160	16185	14822	14176	9919	12666	10442	10446	21045	14370	13007	10349	4502	5265	13299	14577	9138	14851	367	11316	9227	16336	10826	11809	20505	10780	20315	18320	14353	7565	15670	9940
101:33:09	101.552	10311	4941	11451	8400	11429	12130	17265	12628	16404	2852	8738	6236	12666	10324	12366	11877	10459	12944	12674	13244	11463	10704	18969	9944	15366	12809	16670	10527	2966	5966	11189	16446	8240	9189	278	9079	8151	15370	12337	19569	18729	7362	18505	14936	10619	7552	10451	6375
102:03:10	102.053	15725	16421	10370	10632	9126	13737	13737	12843	17324	2299	8042	11299	12282	11788	11856	7881	10354	12375	12666	12446	8607	9556	9864	9919	19514	11408	12868	11527	3337	7172	12088	14805	8662	9075	333	9172	14775	16881	12754	14320	22180	12754	16788	15341	7620	7995	10286	16822
102:33:11	102.553	14472	19522	12383	9151	10387	17277	17695	11594	15822	1789	12265	10704	11324	9666	12826	19577	8776	14539	11244	12881	9345	10282	11252	10206	20653	14400	10573	13628	2185	9362	10940	13396	12826	10446	333	13446	14556	13463	12927	23404	14425	17062	15649	14552	6223	6172	21484	14860
103:03:12	103.053	14788	18421	11206	8991	10716	17830	21362	11354	13649	10096	17817	6776	10759	12695	10058	16400	9885	14155	11982	11775	9316	8793	10155	9780	17619	11581	14383	12716	12560	6544	11489	11197	9679	8392	397	16931	10632	12096	12712	31143	13602	18809	12915	9826	8303	5704	17370	10927
103:33:13	103.554	12012	20239	8573	11476	9582	16298	19868	7974	14999	9383	11126	11543	11058	7843	8607	12573	9915	11476	9088	12586	8944	10020	9151	9037	12746	8447	12683	19847	11822	5856	11653	13029	6455	14100	405	11459	8092	15172	12109	14607	9801	15104	10535	15830	5805	7307	15889	15273
104:03:14	104.054	14497	20315	5864	9223	10130	18248	11860	4042	15227	9835	15126	8181	10455	8603	8674	10586	10628	12176	16332	8645	10974	8873	11522	7894	20509	10223	10691	16033	9231	7822	12687	15792	7345	10822	333	12172	12058	15725	13307	16809	7898	17121	7620	17847	10776	8936	13645	13754
104:33:15	104.554	13931	17699	10695	13332	10733	16661	11358	13704	15809	8991	15328	8590	10210	10451	10493	19640	8662	14915	11071	14033	11548	8514	11932	10413	22547	17619	19860	11020	8784	8632	12805	13645	16299	10012	295	10071	11105	12037	8679	11413	21906	14083	9185	14763	11522	8248	9776	13957
105:03:16	105.054	9016	9544	12265	9168	9421	13434	4903	10695	13721	6755	13813	8658	12978	7911	9067	18159	8514	11619	10299	9480	9261	9636	10008	10349	24054	14366	14839	21045	10586	7674	10096	10084	11185	11050	278	7805	15092	15518	12408	17805	17379	14366	22518	13898	9003	6658	9295	10653
105:33:17	105.555	6907	7151	12834	11932	10501	15024	16889	11155	15839	9873	16982	9843	12442	9641	10375	13294	8421	14126	8430	12484	8396	10560	11860	8881	25649	12640	14623	21408	9506	7873	13265	16244	7860	10113	367	11210	11480	16387	11624	16104	14872	18577	19754	13847	7253	8012	22712	14594
106:03:18	106.055	4557	6248	10514	9168	10362	17957	10632	6615	14248	10721	11438	9092	10370	9700	11012	11387	10383	14041	12413	12497	8569	10598	10674	13742	20332	12581	17168	14657	10518	7341	10889	15294	13927	11176	371	12185	9927	17535	10252	13514	13497	19366	23239	16767	9539	7320	13193	18088
106:33:18	106.555	11366	7156	13029	8923	10830	16311	20045	7784	14007	11164	15189	7556	9805	6687	9354	11716	10873	14206	12746	11278	7894	10033	13353	9236	19851	10978	16636	12240	7957	10759	9185	18927	10417	10054	316	8906	12797	16176	12307	16986	24075	22277	19522	15687	7696	7734	18986	8101
107:03:19	107.055	14809	5700	12843	10944	9780	14834	16923	11961	12113	14189	14172	5375	12244	10678	10746	11577	8375	13889	11269	10792	9911	10421	7869	8653	23910	10206	12649	24050	8345	14176	19383	12581	9510	10421	380	11303	13341	16168	10029	18244	19092	21142	21505	14012	14003	8189	19509	6164
107:33:20	107.556	12826	18839	10569	8826	8282	13894	16775	8590	16007	8881	14240	9565	13881	8944	10227	13535	10700	11877	9101	11050	11244	9295	10927	10257	20493	10615	16138	15919	10421	9691	10105	9379	10227	12868	342	10392	12497	13096	11683	19185	24855	15239	15695	14758	7299	8088	16298	16898
108:03:21	108.056	8902	17218	11113	11408	9881	16294	20708	12835	14893	9544	13683	9877	12041	9991	12792	17096	9311	20294	8160	13564	10666	8472	15332	16978	22843	10468	17277	12143	7809	11024	10172	23476	10164	11522	325	6341	7691	19594	13792	14231	18666	19771	19125	14813	6814	8852	20450	18476
108:33:22	108.556	14982	16408	11493	9299	9236	12041	14476	6185	12649	12839	13197	9695	13100	8928	13248	18704	9624	19691	11311	12961	9067	14805	11071	11514	17885	9822	17476	10569	9134	5088	10489	21121	10223	12999	346	6286	11235	16716	10624	10923	27324	18265	18484	9012	5126	6767	16488	14704
109:03:23	109.056	12716	22687	13113	8970	13193	27037	17560	3928	14083	10552	12856	8181	11240	9586	8350	12632	9615	13915	10269	14429	6177	10590	13683	12910	26775	15948	22117	13062	7151	8932	8425	20374	15417	13172	312	5864	10130	16944	9185	10337	24193	20383	14602	14337	8957	7679	13792	10721
109:33:24	109.557	8793	13725	15012	7383	10138	10750	17526	11168	15733	12088	13982	7949	14067	7345	6907	20320	16159	20594	12248	14315	10071	8514	17197	13607	22235	12598	18400	18974	9607	8936	9497	24936	14940	13151	392	12020	10641	17919	7362	8126	23227	18088	21640	17041	9742	8552	16176	13805
110:03:25	110.057	14104	9970	14446	15978	8814	7177	18805	8185	17556	9354	17197	7400	13337	6919	13050	12088	8139	11923	10358	12636	7961	12248	15054	9607	21003	10025	13324	11801	7312	7274	11898	33168	9906	10341	367	8328	12476	17442	7569	16273	19843	24421	14463	16231	13472	8463	13750	11134
110:33:26	110.557	17197	17501	12362	10788	9885	17509	14661	7008	15408	11392	13712	7725	10531	5261	12459	17885	9991	13771	10750	11839	11531	10543	14244	14100	26370	10797	12261	18695	8362	8075	8911	18695	9754	15446	405	12526	8539	19311	7080	15978	20552	21480	20045	22733	9012	8894	17573	12429
111:03:27	111.058	16885	13809	14138	9349	10839	16822	20779	10299	15164	13197	16590	7109	9484	9856	15813	13628	8430	9691	11847	13746	10873	12172	21940	9261	17256	12252	14408	12067	7506	8117	12286	22332	10109	12598	443	9683	11489	12670	5101	14683	14320	18408	15311	13590	7046	9257	19429	12016
111:33:28	111.558	18518	12704	14172	12809	10438	16581	25104	12995	18792	10771	17248	12489	15261	14425	11155	22125	14602	13151	10295	14235	8535	12261	24598	13202	21851	16497	12181	15033	8088	6059	9425	15505	12320	12354	380	9290	12227	18598	7898	18109	16750	18193	18328	18438	5983	8299	17982	9936
112:03:29	112.058	15315	21121	9122	9835	11738	16843	18699	11079	15261	10594	18455	10058	14543	13784	11851	14180	11041	14214	10700	15687	14586	9413	18864	10759	18910	10231	14231	12269	9020	8345	10062	22307	21092	11257	350	9459	10375	17611	3941	23526	12847	20581	15075	14117	6978	8784	15535	13623
112:33:30	112.558	15231	17345	8430	12062	9877	18332	22535	5852	17602	12784	16218	10843	11341	13923	12459	15809	10088	11704	11649	14202	12995	8316	10122	15396	16396	10092	11316	9236	11257	8096	7700	18615	8219	16784	418	9387	13623	16058	3721	15653	14265	16607	17349	15062	13088	8042	15784	12299
113:03:31	113.059	18273	23244	11826	13353	10999	16463	21556	10687	16054	9919	17552	8801	12003	11674	9619	13235	8826	13092	10894	12771	13505	10522	12860	11835	26176	14957	14687	12818	8573	6843	7864	22028	17552	14628	375	11527	10130	19244	3928	18358	17041	18320	15358	13176	11282	8371	15818	10877
113:33:32	113.559	12919	24391	12624	11889	10666	16725	17906	10451	17796	12362	15273	12666	13096	14104	9236	13324	8826	12282	10586	13328	9286	10046	15324	12020	22657	15366	16315	16007	9316	10864	8400	15830	10691	11809	375	8206	9763	17058	14227	19780	23396	16657	15484	17796	8590	7991	14379	14206
114:03:33	114.059	17336	19172	13050	14931	11531	18058	14273	10847	16826	11539	16978	9826	12269	14425	9025	13037	9493	11742	11784	19404	8793	10295	8552	10020	22877	12328	12851	13480	5021	7193	14088	17666	11843	18577	359	10240	10151	17813	11754	20733	18104	17058	16974	13611	6438	9248	13940	9885
114:33:34	114.559	16379	22670	10792	11590	10940	18223	6324	15792	21957	10408	18396	10438	12965	11067	16763	15265	10725	11548	12303	10354	10442	12860	14640	11569	25083	14716	16282	10830	8122	8708	9860	20248	15547	9641	354	13915	10961	14893	12130	13784	16674	15501	14818	11527	4557	8632	11586	8320
115:03:35	115.06	14404	24185	11864	12999	12754	19590	4109	4126	14375	13379	15893	9025	12586	11307	15155	13548	11640	13573	13640	16906	13138	11649	8826	11020	27585	9472	13910	11830	6037	14872	13936	19813	23062	12969	392	10704	9522	18965	13045	15379	18670	17412	15969	17071	5713	7780	18286	11404
115:33:36	115.56	12843	24931	13733	11008	13488	19147	2717	8434	16737	16564	15995	11628	12868	10776	11898	16936	10392	11569	12999	12472	11185	14493	9278	10818	18822	14320	21615	14244	8742	8430	11134	11640	8906	12083	413	11505	9556	18168	13894	21699	10864	18189	16341	13750	3540	11628	16210	13737
116:03:37	116.06	16066	24509	10320	10214	19332	16543	2160	12594	15096	11459	20328	9033	14889	11332	9607	17636	10054	17708	11075	11581	9472	12455	12092	15931	15307	13526	15742	13818	8468	7328	7877	12337	11978	18400	464	11332	9970	13062	12999	12429	9940	23780	16699	15370	12451	9333	17041	16923
116:33:37	116.56	18598	19408	10295	13965	10510	11805	11130	11839	16007	11624	16636	8793	12552	13577	15151	14607	10560	13569	12088	14484	10759	13834	11518	11176	12581	11940	12096	10446	7472	6696	14020	18695	8130	11290	384	9590	9020	11332	15902	14307	6329	17775	15868	19307	13640	8042	16370	9109
117:03:38	117.061	15374	30324	11839	9489	10442	6578	18463	8691	16699	12881	17206	8312	11864	8944	13168	13223	9632	13493	10628	13332	12716	13058	12480	11362	11459	11240	10961	12459	8274	4852	8523	17826	9695	7269	312	8603	8784	8501	11442	10733	23834	14716	15066	15636	14784	9839	16016	8079
117:33:39	117.561	15733	21552	9560	10788	11927	18349	17379	4936	17539	11294	16155	8012	13839	14716	13037	13278	12560	14455	12117	18028	13054	13155	11704	10813	22839	7725	8075	10649	7514	5738	12353	16197	8493	6814	363	6902	8185	22708	11088	12586	18050	10826	14467	12872	8801	10265	17425	10873
118:03:40	118.061	15868	20058	10472	9759	11320	19024	20602	10657	15126	12126	17952	6552	12889	8961	10041	16450	9700	13758	12442	15024	10113	12261	12750	12978	22640	13134	8286	9084	5054	6666	9155	14109	7400	8354	363	6291	10729	16244	10084	14818	16071	14986	21543	13180	12442	11531	15223	8928
118:33:41	118.561	16185	13307	12590	10193	12261	11455	17737	10641	13716	10476	17666	11948	13408	8814	10100	16062	8759	16045	12278	10923	10809	12683	11337	12041	20632	13573	6042	11662	3903	7206	7611	12526	6063	9619	338	6219	10915	14328	9122	17007	16248	15088	16130	12413	14404	11261	12742	8940
119:03:42	119.062	17767	6535	13012	11733	10927	13902	17066	6118	14733	11008	16214	8459	12214	10539	9033	15290	10172	14446	12974	14429	11096	13535	13227	11729	16400	14539	8396	10569	8054	6628	7430	20100	6983	9202	329	5662	10548	19071	9164	16792	22974	14915	13750	13185	8923	6877	13632	9991
119:33:43	119.562	15729	5156	14716	9809	11354	14687	18332	13708	18239	10430	15083	8624	16391	12830	16117	18185	8999	13645	13142	14826	8025	13712	10548	10455	11539	21248	8244	11235	9961	13269	6088	13147	7839	13674	325	8421	10075	16349	7193	25159	13607	13375	10269	19573	11645	8868	16214	7809
120:03:44	120.062	19636	38426	10349	10721	10375	16720	15965	11121	14450	10025	16290	7700	11425	8531	9413	14020	7523	12729	13505	14615	9569	12345	13362	10624	8092	11961	8759	10324	8088	9008	8404	20248	10328	15142	409	9830	9889	16176	13387	16358	13847	15619	7303	14045	10046	9269	16931	8328
[truncated: 6 more columns]

## Sheet: Ave 3
0-72 hours: 12-12 Light-Dark (LD)
72-120 hours: Constant Darkness (DD)
Period analysis: DD, 72-120 hours.
Time (hrs)	TD2/+; BGLUC/+	PsiRNAiKK/+; BGLUC/+	TD2/PsiRNAiKK; BGLUC/+
0	70671.8	71923.7	74075
0.5	72470.8	81905.2	72493.8
1.00028	72267.6	74680.1	68766.3
1.50056	70482	86125.1	58459.6
2.00083	66446.8	67650.3	55440.2
2.50111	67888.7	57989.5	46916.4
3.00139	63526.7	54547.4	44171.1
3.50167	57145.8	48726.6	38356.8
4.00194	49370.2	46944.6	34113.1
4.50222	49277	43336.8	32881.6
5.0025	46713.1	38079.9	31899
5.5025	43738.6	39737.3	31589.6
6.00278	44072.8	36948.2	31029.1
6.50306	46143.8	34466.2	29941.8
7.00333	41689.5	32056.7	30780.2
7.50361	38779.3	33365.3	31489
8.00389	36437.4	32432.8	29402.3
8.50417	39019.8	30173.5	26193.6
9.00444	33859.5	31168.3	27670.1
9.50472	36248.6	31996.1	28046
10.005	35250.8	27304.9	27151.4
10.5053	35759.9	27174	26348.4
11.0053	33683.6	26899.2	27180.6
11.5056	36498.2	29857.2	26245.3
12.0058	35064.6	30123.9	25548.2
12.5061	35005.9	30895.5	27923.1
13.0064	36071.6	26008.5	26896.7
13.5067	34360	29907.2	27888.8
14.0069	35763.2	28634.2	28800.3
14.5072	33754.6	29674.8	29848.8
15.0075	36107.8	32948.1	30182.1
15.5078	39626.1	34226.2	29546.8
16.0081	38835.4	33100.2	32333
16.5083	40187	38053.8	30786.2
17.0086	35890.6	37542.4	29686.2
17.5086	36700.7	35520.7	30486.6
18.0089	38231.2	33975.4	30873.8
18.5092	41080.9	37768.2	31953
19.0094	40323.1	33256.4	28861.2
19.5097	42051	37341.8	29679.5
20.01	39282.9	34785.8	29350.6
20.5103	36856.2	32038.8	29549.9
21.0106	35634.9	32919.1	28305.7
21.5108	31736.4	30073.7	26378.8
22.0111	35251.6	29772.8	26175.4
22.5114	32866.5	29531.8	25917.9
23.0114	32419.1	29868.8	24565.8
23.5117	32197.8	25914.1	23055
24.0119	31372.2	23184.3	21525.5
24.5122	26577.8	22995.7	21306.2
25.0125	26286.8	20788.6	21901.2
25.5128	26787.2	18979.4	19122.4
26.0131	27089.8	19618.6	17658.8
26.5133	26901.8	19486.6	17276
27.0136	23833.9	18829.6	16552.4
27.5139	24071.4	17784.6	16193.1
28.0139	22433.3	16982.8	14514
28.5142	21287.8	14706.2	14346.6
29.0144	20552.4	14491.8	13452
29.5147	20089.4	14502.7	14094.1
30.015	18934.8	14000.2	13075.6
30.5153	19782.1	14539.8	13037.3
31.0156	18474.2	13431.2	13091.8
31.5158	18857.7	13032.2	12704
32.0161	20084.2	13339.8	13086.8
32.5164	20359.5	14588.5	13648.3
33.0164	20164.9	14362.3	14442.5
33.5167	20003.9	13775.6	15313.5
34.0169	20228.8	14115.1	14794.7
34.5172	18868.2	15018.1	15167
35.0175	17727.2	15100.3	14979.1
35.5178	22564.7	14392.3	16207.3
36.0181	22918.5	14486.1	17188.2
36.5183	25702.5	14542	18401.9
37.0186	25424.2	17336.2	19474.9
37.5189	27745.8	18290.2	20367.5
38.0189	28555.2	20159.8	23154.1
38.5192	29189.9	23301.8	23139.6
39.0194	32801	23943.2	23584.1
39.5197	32727.9	24396.2	25172.1
40.02	35425.7	25148.5	27812.6
40.5203	35900.2	27428.2	27275.5
41.0206	34742.7	27916.7	26126.5
41.5208	35247.7	28871.8	27898.9
42.0211	35738.2	28000.7	29076.5
42.5214	36895.8	29742.8	26924.7
43.0217	33679.5	31907.4	27168.2
43.5219	37390.8	29985.8	27115
44.0219	34395.7	26084.6	25979
44.5222	35124.3	25621.6	25431.6
45.0225	33385.1	27847.8	23805
45.5228	32891.6	24507.9	24096.7
46.0231	30988.8	25684.3	22039.1
46.5233	28497.5	23787.1	20516.1
47.0236	23899.9	22156.2	18155.4
47.5239	28681.9	18977.8	17481.5
48.0242	26189	17001.1	16286.7
48.5244	24001.8	16242.3	16180.1
49.0244	24484.9	15629.5	14945.1
49.5247	21982.2	16874.9	14758.4
50.025	21070.6	15526.2	13519.1
50.5253	19441	14371.3	12169.9
51.0256	21490.6	12333.2	11074
51.5258	19870.3	13258.5	10989.9
52.0261	17685.6	11723.1	11115.9
52.5264	17291.5	11073.8	9934.46
53.0267	15516	10721.6	9355.83
53.5269	15484.2	10367	9244.83
54.0272	13124.3	10644.1	8995.29
54.5275	12761.4	9441.58	8868.25
55.0278	12205.6	8726.58	8593.58
55.5281	12507.2	8927.25	7769.62
56.0283	14004.6	9372.92	9084.62
56.5286	12350.4	9802.92	9310
57.0289	11756.7	9618.83	8691.58
57.5292	13069.4	10502.8	9428.04
58.0294	13580.8	10749.3	9621.04
58.5297	13664	12060.1	9562.79
59.03	14248.7	12092.5	9833.04
59.53	13686.2	12271.3	10321.8
60.0303	16283.8	13590.6	11925.3
60.5306	17583.7	14855.7	12942.5
61.0308	18937.1	16112	12738.4
61.5311	17907.2	18107.1	13533.8
62.0314	20912	18933.1	14650.7
62.5317	24326.1	20975.8	16295.7
63.0319	25378.2	26363.5	17715.4
63.5322	24211.8	22638.6	18832.4
64.0325	26545.5	23522.9	19010.5
64.5328	26601	27271.2	20651.7
65.0331	27894.4	26504.1	20437
65.5333	26944.7	28542.2	20561
66.0336	26541.5	31634	19550.2
66.5339	29083.1	30140.8	19742.3
67.0342	29823.6	29243.6	20423.5
67.5344	28889.8	29111.4	19354
68.0347	27153.8	33231.2	20049.8
68.535	25663	27531.8	18976.2
69.0353	26629.2	27599	17578.7
69.5356	27284.1	30607.6	17155.3
70.0358	24919.3	29738.9	17138.2
70.5361	23745.1	26884.8	16232.6
71.0364	20450.3	26244.8	14853.6
71.5367	20990.6	22843.8	15526.1
72.0369	20339.9	21597.7	15039.1
72.5372	22183.6	19379.2	14753.4
73.0375	21764.2	18715.8	13877.7
73.5378	19348.8	17260.4	15561.5
74.0381	18733	18526.8	12702
74.5383	19410.1	18314	12038.2
75.0386	17053.5	16849.2	12323.3
75.5389	16578	16922.4	10812.1
76.0389	15695.5	16526.2	10361.3
76.5392	14664.2	15215.9	10594.9
77.0394	13951.2	14875.8	10032.4
77.5397	13886.6	15042	9232.25
78.04	14051.1	13664.3	9473.12
78.5403	13569.8	12706.8	9630.46
79.0406	13680.2	13224.9	8352.88
79.5408	11147	12061.2	9231.29
80.0411	12509	12295.4	9574.04
80.5414	12300	11882	9942.92
81.0417	11554.8	11874.8	9770.12
81.5419	12875	11255.2	9216.42
82.0422	13215.8	11914.8	9079.79
82.5425	11762.4	12430.2	10695.8
83.0428	12023.7	12700.6	10084.3
83.5431	12828.2	13220.2	10579.7
84.0433	13226.3	12293.8	10995.6
84.5436	13027.2	14780.6	10992
85.0439	12134.7	12777.2	11904.1
85.5442	13574.1	14235.4	12293.8
86.0444	13546.1	14428.8	11849.3
86.5447	15075.9	15394.7	12035.8
87.045	16439.5	17476.8	13368.9
87.5453	17974.3	19033.4	12840.2
88.0456	17843.2	19225.6	13142.3
88.5458	19377	19039.1	13128.2
89.0458	18912.9	19104.5	12445.5
89.5461	19118.4	20041.9	12607.1
90.0464	19557.3	19261.9	14567.1
90.5467	18579.1	20908.8	14501.6
91.0469	19347.2	19411	14555
91.5472	18841.3	20267.4	13402.3
92.0475	18920.2	21062.2	14158.1
92.5478	18802.3	21671.6	14751.8
93.0481	19663.8	21048.6	14532.6
93.5483	18675.8	21471.4	13307.1
94.0486	17506	20305.6	13284.9
94.5489	18590.8	20440.2	13794.2
95.0492	18243	20679.8	13269.5
95.5494	16856.8	20545.2	13162.8
96.0497	16667.1	18992.1	13285.7
96.55	16705.7	18442	12717
97.0503	16758.8	16992.7	12200.8
97.5506	17199.2	17332.9	12325.6
98.0508	16140	16505.8	11966
98.5511	15962.8	16365.3	10977.5
99.0514	16187.8	15517.7	11176.2
99.5517	15514.5	15798.6	10597.2
100.052	14855.2	15597.8	10318.4
100.552	15557.5	14636.9	10198.8
101.052	14519	14639.8	9068.96
101.553	14390.7	14468	9001.75
102.053	15008.2	12764.2	9486.75
102.553	13632.7	12877.6	9259
103.054	12137.1	12480.8	10100.5
103.554	14129.2	12834.2	10490.2
104.054	12887.9	11617	10153.3
104.554	12111.4	11821.7	9828.79
105.054	11678.5	12074.8	9820.29
105.555	12650.7	13061.2	9954.58
106.055	13825.8	11471.1	10174.4
106.555	12462.2	11537.6	10260.7
107.056	13769.1	12027.6	10736.5
107.556	11805.3	12875.3	10442.6
108.056	12267	12640.2	10251.2
108.556	13805	11344.5	10393.6
109.057	12986.8	12519.6	10952.8
109.557	12471.5	12508.2	10804.6
110.057	12071.9	12456.6	10396.3
110.558	13082.1	13214.8	10674.9
111.058	14326.1	13259.1	11404.3
111.558	14238.9	12632.7	10873.4
112.058	15719.3	13888.3	11459.4
112.559	16635.9	14714.4	10331.6
113.059	15550.6	15714.3	10957.2
113.559	14861.9	15117	11075.4
114.059	17599.2	15378.6	11063.3
114.56	16052	14135.8	11064
115.06	14495.2	14830.3	10990.7
115.56	15440.6	15463.6	10556.1
116.061	15025.7	15652.7	10177.9
116.561	14743.1	15212.8	9711.96
117.061	15876	15477.3	10255.8
117.561	14631.2	14828.9	10514.9
118.061	15210	14729.4	9711.38
118.562	14903	16631.7	10019
119.062	14580.5	16281.7	10172.8
119.562	13561	15914.8	9944.04
120.062	13336.8	13993.7	10147.9

## Sheet: Wells 3
		TD2/+; BGLUC/+ Wells												PsiRNAiKK/+; BGLUC/+ Wells												TD2/PsiRNAiKK; BGLUC/+ Wells
Time (hr:min:sec - from reader)	Time (hrs)	A01	A02	A03	A04	A05	A06	A07	A08	A09	A10	A11	A12	C01	C02	C03	C04	C05	C06	C07	C08	C09	C10	C11	C12	G01	G02	G03	G04	G05	G06	G07	G08	G09	G10	G11	G12	H01	H02	H03	H04	H05	H06	H07	H08	H09	H10	H11	H12
00:00:00	0	43633	74514	150154	56682	63359	83914	81714	37291	77962	79866	45013	53960	87937	58121	52280	34924	38810	52327	70732	73230	64482	71914	77034	181293	58830	91895	57332	76809	48043	82750	55948	94546	61207	56674	62895	72614	114471	69824	82930	94272	53513	44578	58750	91470	140436	77071	60350	70592
00:30:00	0.5	42705	103298	148386	63899	63692	72408	65279	43190	62122	67723	70259	66689	78439	85479	67073	31670	43638	39970	95357	96142	81292	129508	94884	139411	52006	83065	39135	65330	38316	60852	44824	60404	53606	77105	49562	131560	151774	65097	72998	66870	74810	74678	66815	61683	69630	102916	106764	70052
01:00:01	1.00028	34054	99236	102444	83905	60400	69850	75810	39709	66017	74780	78511	82495	83551	80224	52420	14100	74252	31518	47600	86349	80562	118057	80707	146821	43173	65532	38949	77008	34653	88921	78596	71517	25206	66393	80359	71985	158885	43072	64507	65979	71792	74766	70993	60999	63287	91730	85019	57070
01:30:02	1.50056	51888	108848	80874	64794	51255	73489	93901	37552	40544	83276	103546	55817	74290	112716	38190	88978	120564	85669	29957	94010	92082	80237	85884	130924	34451	45912	38481	61181	31151	70986	66014	58121	21931	59205	74226	87105	95386	30476	46528	67262	52871	73120	56218	70685	67575	80000	67777	46368
02:00:03	2.00083	39895	121285	105476	53770	62852	51943	56501	32282	48676	67064	110047	47571	53107	69554	30113	87574	67115	100224	30126	66009	64321	79207	74357	90097	38295	47292	33118	55137	34510	59401	90976	41468	19446	48693	59252	97273	115168	29995	50457	58978	36725	56678	50541	61456	62451	74652	56808	51795
02:30:04	2.50111	79503	94639	112141	43747	93344	48592	55057	28130	36907	80057	94901	47646	46570	57041	27303	43967	63667	87370	31620	61362	51179	69791	55179	100825	34012	46693	26104	41945	27045	45422	43262	39561	18210	50668	52322	67376	146227	25780	43882	49178	51879	55555	43076	46144	19716	53048	43469	55420
03:00:05	3.00139	123839	83027	81938	37430	80385	52550	53994	25463	29775	77296	88413	28210	43709	60358	26138	37021	52614	96826	24244	65237	56687	68883	46566	76286	27113	39072	29079	42401	25054	44191	29957	38595	21383	46575	44249	105918	106821	25054	30700	43536	43815	48925	35134	38181	52145	44515	48879	48815
03:30:06	3.50167	77557	92833	76651	37519	86277	43325	46267	23446	36687	51086	77211	36890	44456	46440	20720	54753	44368	71757	24425	56927	50656	58455	40781	70981	23383	39903	22189	47009	27277	39042	29594	36388	19902	44169	44473	44701	73783	24003	33890	51246	32569	45735	31493	32666	46781	44671	49267	36430
04:00:07	4.00194	88371	45456	65267	32712	67335	37367	48166	21923	25307	56454	65591	38494	42755	55496	22459	36781	40768	68019	29214	53593	45638	51500	51651	65461	27142	42355	21471	44005	17573	36780	21598	32172	21661	39616	38861	57500	65688	17277	21471	38979	38135	37683	22450	32172	19421	46566	43401	34738
04:30:08	4.50222	74797	70133	65575	30763	91321	36995	38477	23328	31725	41435	60784	25991	44275	40089	24071	37443	43950	52171	32746	49060	41194	34050	27974	93018	25079	33750	21602	41819	25733	32358	22914	30164	20138	36135	44093	36122	43823	25050	29725	40654	36037	34620	24611	33383	26391	48980	35641	40337
05:00:09	5.0025	59004	86345	59809	36552	78718	33582	40152	24028	26953	38262	51090	26062	34447	41553	25383	38637	42540	40363	24396	48613	41363	42380	21830	55454	25784	30320	19180	35573	25514	30586	25189	26995	19332	30856	36071	26801	65903	20075	24661	43321	28957	34181	28590	46338	23855	45422	31839	40232
05:30:09	5.5025	65938	48326	52555	32050	59176	40346	37510	33455	31117	40401	55711	28278	27653	50542	27560	34442	36569	52694	28324	51187	35514	42848	18176	71339	25691	33210	23092	36662	23265	27906	19062	29100	14636	32598	37709	41751	48026	24185	27569	43967	23197	32818	24324	34539	43524	39316	32966	39038
06:00:10	6.00278	62228	56876	56860	27932	66187	36071	31755	29181	25843	48482	57408	30050	17164	42857	22172	32936	42642	37477	29130	45161	41578	44465	25349	62447	20931	30316	22746	36903	23071	22298	32164	28083	17509	29771	37371	42688	51580	21324	27079	26071	31101	32337	28851	29181	39671	44448	34649	34556
06:30:11	6.50306	74189	73445	47039	35464	69909	46689	31185	26134	26661	40924	52956	29130	26467	42030	24645	29784	33936	32096	28227	42173	38511	38840	13906	62979	23197	30640	24547	24311	19720	36941	23619	28244	19037	29320	33126	27117	43988	16704	26598	32442	33970	38375	23185	35797	32839	35772	36869	42245
07:00:12	7.00333	54935	75793	50423	37443	52306	28024	27434	27299	27649	39511	58281	21176	18033	36894	28088	35843	30235	25142	24847	30894	42815	38705	11206	61978	22189	30902	27016	35004	24471	23868	16619	31067	14193	28016	26619	36801	63886	21235	31759	30898	32164	37147	22569	21704	36016	42924	39987	41671
07:30:13	7.50361	52019	60159	49018	25421	55412	26801	26463	24902	27965	39958	54695	22539	27581	47161	26062	29143	26370	22155	21311	49866	35654	37050	22556	55475	24088	30864	25349	35021	22387	23227	26510	40861	20531	27813	38118	31873	72998	18915	22712	31759	22062	29037	23860	28889	36358	44022	41743	36738
08:00:14	8.00389	42266	38785	51593	29278	46229	36291	24459	28746	27826	41304	42705	27767	39325	48047	19944	29898	28375	27235	26421	38135	46072	38118	7894	39730	22826	29615	20619	38215	14590	21522	19501	29889	17944	29459	40886	30366	60236	16522	28180	34767	28919	33831	17990	25522	35734	37320	42861	28341
08:30:15	8.50417	44254	74104	40793	27961	42338	36641	23682	26788	25058	37962	58020	30636	36814	40291	20509	28391	31864	21227	23311	40017	43089	26290	3768	46511	19231	32577	22957	33864	22442	22872	21741	28383	13868	25818	28543	23509	41241	16775	24028	28657	23995	27227	24391	19940	18315	36628	32375	39270
09:00:16	9.00444	40633	51782	38646	29991	41258	31037	27320	29944	19881	33143	38283	24396	30999	40494	27615	24771	28400	20931	31679	40827	44115	24455	12864	46870	25320	29640	16471	31936	23218	24906	24320	22581	14349	24670	34118	25552	34822	14501	26126	28543	33354	33012	24995	24223	39219	44663	31527	32016
09:30:17	9.50472	45824	55973	47398	31548	41080	40084	32442	29763	21847	33763	37979	17282	44009	45195	21691	28062	33987	23007	25223	38869	32215	22109	7299	62287	23134	27383	17606	35611	27168	34903	29033	27265	15611	23033	36198	23277	50664	15058	29269	26463	26872	36341	19408	26315	30999	30430	34236	26826
10:00:18	10.005	48140	49090	36730	31894	37962	37034	28489	26467	27607	34818	37742	27037	33282	45094	15374	24497	22931	19923	20877	37168	32316	17526	11058	47613	23539	28902	11459	37911	21990	24775	24547	27016	14476	29379	40641	30176	38704	14324	21581	35008	27320	37755	24227	25189	15877	35396	32822	28619
10:30:19	10.5053	40405	39797	40173	30999	48837	40570	27345	36945	22666	36734	34375	30273	33468	41802	10624	20248	26493	25480	19830	35253	36624	18666	8932	48668	22885	20602	12282	27661	22421	25438	20923	30075	11809	24750	41068	26995	37856	14290	26421	29552	23058	34670	24585	18244	33982	34358	33003	35434
11:00:19	11.0053	45157	40637	43473	32704	38958	36704	31970	19358	29244	31113	25396	29489	29986	44899	11775	17585	28379	22915	26033	36958	33101	17020	4143	49997	22332	21733	15126	37966	23104	25396	23893	25218	14058	32181	35831	28653	42507	18822	32649	34531	18644	36637	21383	26851	19248	26923	36274	32375
11:30:20	11.5056	42680	45980	53985	37637	35000	25467	39397	20214	27088	38299	33084	39148	25239	37536	26560	16750	31607	23531	24805	46305	31425	19172	15990	59366	26299	32565	16408	30058	18147	30037	22839	27345	11932	26273	35210	28657	32029	16995	16877	29784	24518	33523	23041	20417	30868	29624	36358	30083
12:00:21	12.0058	43237	47799	43507	32890	43596	31476	35308	21598	20248	35337	32932	32847	17210	34194	28573	7696	30451	25864	23531	45794	35675	19248	30754	62497	21864	35514	17374	26463	14138	23446	38629	21450	8961	30780	39489	19163	35459	15931	20134	29763	23050	41473	21320	14239	24915	25830	33898	29873
12:30:22	12.5061	44469	49039	40173	33210	36249	35265	33881	21083	24784	32333	35362	34223	18741	37029	22248	9565	30539	27725	23168	49714	38966	25020	31868	56163	29269	28569	14256	32366	20666	30278	23501	24028	10556	23547	37004	24801	39021	16088	29611	37147	27240	40342	20826	28695	32868	31965	36097	31413
13:00:23	13.0064	41540	58948	34392	33172	41152	40684	34396	15189	29577	36253	31594	35962	21767	28429	24476	8215	16813	24661	22476	34915	36219	23818	16400	53913	23408	27130	20037	29446	19708	25206	19235	26569	11961	27058	45435	20771	33193	20248	20982	35088	24687	38295	18573	28704	33101	32809	31991	31885
13:30:24	13.5067	36333	40865	36489	33763	45119	30826	39907	23320	29417	35253	27818	33210	22898	54002	21632	8687	36400	26556	21037	47182	38059	18906	18096	45431	25505	28721	21514	30906	24104	27299	24509	25328	14202	24193	45359	28341	47833	20459	26919	36067	19151	26801	14463	21628	25239	38455	34345	37991
14:00:25	14.0069	33915	37806	31464	41266	49411	30708	35109	20746	27206	40156	46478	34894	26851	43751	21847	4611	31446	25893	24851	36928	30695	15801	32877	48060	28189	32472	24324	36400	20999	30155	26003	24176	18037	32615	40865	25400	36451	23704	21476	38481	16493	35641	20860	27721	25788	43207	27839	33911
14:30:26	14.5072	35865	35557	39312	38878	40853	37991	39751	19839	29750	30037	28160	29062	25505	56108	24286	6232	26303	25885	28607	49896	39409	14450	17843	41574	28269	30434	14252	31020	26569	27239	26113	27058	13569	26299	40375	23543	44925	23910	29716	34236	17024	43194	19855	24801	35860	38379	49406	40325
15:00:27	15.0075	34341	47520	33012	42351	43870	39312	38164	21708	26210	44604	28337	33864	23244	49854	25417	5864	38316	21362	22071	49369	45022	17450	50360	47048	24923	23763	28531	39489	23033	31075	27657	25223	14012	28050	44557	28320	40388	29113	32295	33421	22362	31088	19020	26784	24033	39358	42739	45136
15:30:28	15.5078	42329	40236	43271	54960	48453	48824	34156	26151	24906	32818	38692	40717	23687	60603	29510	3886	17425	25505	19231	57682	37958	25712	36594	72922	25185	31991	20585	31970	27362	28117	25155	24214	19872	21995	44650	26079	43507	16687	32860	38118	19307	32835	21670	31459	30286	45494	30134	39591
16:00:29	16.0081	45946	33527	44110	53812	54154	41853	46803	23396	22602	41097	29641	29084	27404	49077	31257	3396	22615	27240	22944	54479	43709	25611	27872	61598	29573	32607	19708	32265	23737	31366	26079	25117	20273	35447	65283	30054	40240	24788	31463	39840	18041	36890	26299	27185	40245	37578	46819	35096
16:30:30	16.5083	36514	39878	45651	42165	48643	49896	50689	26117	41929	39975	29417	31370	23003	54990	34442	3278	31143	22505	32409	56087	54205	20678	61404	62502	30906	33447	27421	26180	18826	27442	28932	26290	22016	25041	36156	39734	46157	30636	33527	36953	23910	31003	24003	32868	26201	44085	27628	39506
17:00:31	17.0086	37156	33590	46701	38489	41583	30176	42211	30138	30961	36840	30653	32189	17282	54610	32628	6738	27455	19273	39126	47073	52365	22708	72243	59008	30754	35210	17995	26999	28130	31383	26147	21028	19231	32506	40916	20417	48630	28324	42431	30889	23695	20244	23569	30286	26096	35075	32607	39907
17:30:31	17.5086	38464	36287	44980	36282	45013	37827	47824	17699	30565	49465	28872	27130	22404	51377	29548	21083	11780	10375	35704	54711	53715	27062	57825	50664	29965	31767	24007	38823	25780	27919	27391	26282	26543	24725	35303	32442	48267	34974	35514	29016	25864	25780	16995	23471	22788	34177	44612	39274
18:00:32	18.0089	49926	51069	40034	39633	45917	39190	42663	21877	37401	40367	27767	22931	23725	53120	40536	17547	11767	15020	31244	38295	49668	24252	48305	54226	32067	37152	18282	27818	15953	33438	26531	27054	14505	32468	39928	29687	49904	38890	43072	38692	19362	40886	19197	22235	24151	34814	41730	33155
18:30:33	18.5092	44241	51440	47132	44456	41287	50200	40245	21362	38147	48719	30759	34983	25775	67368	32708	28573	11324	18421	41342	48204	50056	19341	37282	72825	29404	34058	24585	35236	24704	31868	28716	29746	16704	29273	28628	39464	46878	31303	36004	37173	31290	46178	18543	29425	25269	45115	26725	40582
19:00:34	19.0094	42667	51056	42553	53188	41224	48735	44777	20126	40253	30062	28054	41182	18151	44861	33810	31569	32687	11632	24138	42131	48309	22370	37641	51778	23256	32020	21792	37354	15480	27543	29045	30986	11809	29645	43237	20535	34869	29619	28809	38118	25712	33105	20050	21417	37227	32885	42747	25408
19:30:35	19.5097	73387	45874	49453	44958	41781	42578	44553	21708	45532	39629	25012	30147	24298	50740	30645	29927	20366	25349	31949	47803	51053	24324	42384	69263	28421	41059	22657	34476	21560	31130	27121	29683	16117	30577	25193	34805	45313	32016	22379	35371	26417	35645	14720	27227	22045	32337	36063	39975
20:00:36	20.01	53939	48537	43317	39236	45300	30333	39025	22898	44414	43089	23657	37650	26497	51027	37152	29868	13197	21328	25607	41346	49284	21666	51229	49229	27269	33822	26847	40148	18640	30784	25607	29501	17628	27581	42013	38726	39477	32607	29586	23636	25341	32430	14649	19265	28100	30560	26720	43477
20:30:37	20.5103	59413	34928	47596	38489	41591	33071	33080	24872	31801	43081	26391	27961	28341	40646	32236	28147	8485	13413	34383	38379	45980	18699	39607	56150	29147	26737	23961	27480	21096	33548	25674	32324	20915	25775	42983	33712	43228	26121	25805	36755	24324	24737	17619	25138	35421	39185	29522	37991
21:00:38	21.0106	32143	39181	35962	47267	36303	39536	44942	20531	28379	42671	22147	38557	25978	49651	34607	24003	18830	16349	33742	38333	40751	25531	36865	50389	30320	30472	26839	38704	24480	27176	19784	27974	20817	20269	44705	25699	37835	25227	20163	31611	21598	33809	17948	28843	20277	31366	33818	39603
21:30:39	21.5108	38502	34670	37996	38169	35409	32147	35987	15337	27113	33923	21471	30113	12071	42709	27244	25678	17307	19138	24547	47853	44114	20957	36447	42819	24054	30586	22256	24050	11729	29742	17130	28320	18358	30978	42920	31729	32417	28353	21590	31809	17442	37941	8738	26872	20670	28261	33050	34096
22:00:40	22.0111	39460	34134	40097	42916	41882	42182	44916	15172	31430	47714	19050	24066	14780	50571	29387	21809	20362	23159	20012	30012	37059	18028	41941	50153	27986	30370	24767	25050	15569	29130	23054	29611	20277	22172	42781	22050	34476	23889	24501	26391	18564	28037	15712	32603	22037	20197	35797	33189
22:30:41	22.5114	32236	38266	40439	47550	37156	26906	35903	15290	31388	38101	19303	31860	14054	41418	33902	22666	24518	13750	38477	35354	37109	18919	40198	34016	27737	28699	19952	31320	15488	27763	19927	17898	18746	23661	44448	32257	34856	20324	27796	20476	19147	27830	16088	31054	21885	32071	29995	32611
23:00:41	23.0114	25311	25733	38434	49010	33772	36413	31050	22594	37063	42296	20282	27071	25185	36831	30126	14763	18497	22033	27362	36683	38080	18391	40253	50221	25488	37915	23054	30273	17877	31708	17653	11797	18404	23826	33303	28953	39418	22189	20050	22433	18720	28227	14699	21602	22914	28999	25847	24231
23:30:42	23.5117	45689	33826	28754	42460	34645	32489	37958	23860	27396	36519	16830	25948	22218	29923	23037	13096	17349	18750	21952	45085	46769	17995	24885	29910	26906	24978	19657	25839	16855	25303	19716	10092	17345	20906	42131	32358	33573	19303	20822	25223	17391	27438	12417	19391	12505	21252	31105	30813
24:00:43	24.0119	35493	32037	30662	37342	38713	34156	33459	22619	31544	35586	16923	27932	18054	26050	25632	16311	18927	15345	22936	35519	30269	16986	19952	32231	19125	26775	10408	23915	15581	23822	34561	5658	14417	21619	36852	20746	30219	18130	18564	28476	13071	15434	14197	29510	12872	28240	23986	30434
24:30:44	24.5122	25725	17265	30198	29776	40625	23653	33919	22974	25206	34265	15995	19332	13881	28126	27856	17915	18201	17003	25923	24510	31396	15358	21273	34506	19661	22075	13678	21556	23649	19417	27467	23893	12193	18919	25864	27155	31248	18784	20931	22729	17079	17666	15134	18653	13792	29159	22336	28311
25:00:45	25.0125	19214	20716	30463	31818	33308	38527	26341	16590	24598	30864	13978	29024	11071	22729	27168	17556	14332	12986	17471	34822	24104	19716	20931	26577	22547	24463	12556	23024	17969	21623	17910	23100	12636	23341	26813	28636	26607	17336	18602	25543	12792	28446	11906	19649	13370	18792	48761	29206
25:30:46	25.5128	20560	23332	34624	41346	34362	28801	19754	18337	21050	36472	14856	27953	9649	18455	21670	22514	15358	15872	14813	29645	26818	15261	16366	21332	19569	22210	15564	23864	14269	17256	15805	25944	10522	17779	29514	29218	22248	18480	13552	24223	16417	16151	10278	21573	13455	15130	22581	23336
26:00:47	26.0131	32282	25007	36886	31244	35489	29978	29176	15493	29075	26662	14277	19509	11712	28797	24210	16185	13678	17206	18779	21801	26476	15374	11290	29915	21737	17995	9003	17092	14936	18564	9012	19526	12670	19779	18396	24906	22218	15893	11712	22353	15543	18396	10421	21999	14661	18931	26695	21374
26:30:48	26.5133	32476	35991	29539	32080	26012	27235	25286	14708	24497	34438	14396	26164	12843	28037	28889	15661	17054	17374	16092	26737	23801	14269	10016	23066	16514	23341	14214	22417	16564	18893	12611	19990	10307	17957	14231	20282	19716	19476	14206	20822	12231	14923	8029	15788	12910	23644	24636	20923
27:00:49	27.0136	22315	23071	26801	33590	28088	25155	25712	11046	27337	25742	11303	25847	13105	29548	15712	11231	10733	18058	22969	35308	18974	16239	11704	22374	15818	21725	11877	16062	11033	16936	13834	17294	9725	11476	25404	23379	21746	13531	12725	21636	11835	17666	7890	18484	13307	17214	26628	20033
27:30:50	27.5139	30535	19020	34029	27105	26083	29522	22961	12839	23969	30421	13408	18965	11678	28286	19839	13999	14434	20151	20653	18324	20834	10771	8151	26295	14809	25691	11176	22898	12041	15712	11159	20480	8362	17294	24383	22277	17412	9138	13539	20433	10889	17180	6392	18345	15809	20079	16661	16476
28:00:50	28.0139	31366	16581	24645	29358	26320	23163	20653	12632	15083	32835	12742	23822	14746	29164	16218	8126	12062	17425	18345	25839	20125	9961	6025	25758	11261	22889	11619	18889	11670	15594	12332	13691	6767	18244	25142	16978	19185	9974	11708	18611	5780	13910	7080	12332	10446	15615	16999	21619
28:30:51	28.5142	22611	17033	20560	31016	28130	18299	20197	10839	21488	29742	11138	24400	14822	25674	19552	5902	9468	18535	10641	17429	19016	7860	6337	21239	13083	18623	15096	20826	10193	15109	11670	7894	6793	15172	19151	12826	15653	9754	13370	16320	10539	14290	6303	15868	14729	13172	28045	19839
29:00:52	29.0144	21151	26640	24809	25581	25151	22455	17953	10636	16459	24809	14674	16311	14358	33746	17585	3654	11046	13615	11379	12413	16661	11311	8999	19134	10839	16307	12721	18923	8906	7518	10197	14720	6063	17990	24463	12552	16990	9965	11953	18134	10476	13303	8155	12375	15758	14535	13868	16138
29:30:53	29.5147	17619	26514	26417	29379	23467	17155	18577	9987	15206	27290	9598	19864	14784	24746	17822	5451	7400	18505	11784	15531	19931	9780	9092	19206	13733	15071	10780	16332	11809	15117	11067	16809	5864	16185	18995	19514	19066	9894	13353	15788	12868	10797	7071	13826	12016	20087	18277	13940
30:00:54	30.015	19349	30928	23847	24796	26261	10155	16877	11552	16999	26940	10181	9333	8970	18767	13856	8472	12130	16855	9147	23311	17062	10451	8307	20674	10645	14995	6666	17332	12176	13265	7328	9792	5236	17138	19012	15826	18978	10084	11602	16780	11029	14796	6215	16801	10257	13615	17999	16248
30:30:55	30.5153	21649	20400	24387	26261	22493	15142	18809	9029	24552	23851	12940	17872	11830	17893	15649	16535	14940	14172	11818	14974	14505	10214	13396	18552	12564	16425	7632	21560	9307	13543	10725	8991	5476	14370	21024	20619	18269	9898	11763	16674	7080	12792	7016	12404	10767	8286	18206	17505
31:00:56	31.0156	16733	19290	21155	25007	24273	17948	18471	9987	14197	27531	9999	17100	9446	21358	16210	9560	11915	14687	10501	20130	16733	10501	5185	14948	12944	16227	10459	16982	13130	13636	10944	14155	6788	17636	21484	16657	14526	8463	10455	7632	7797	11223	6898	18923	7274	15889	19041	15041
31:30:57	31.5158	17978	13868	22906	26927	21843	18244	17780	11067	17961	32615	9729	15374	7253	18923	16569	7320	10067	13543	11257	21564	16990	8793	8636	15472	11940	15303	10240	15294	9430	11484	8312	14590	6653	13210	22471	17480	14834	8122	11016	16155	7970	13877	6464	15126	10961	15446	18003	10514
32:00:58	32.0161	27442	16248	26020	24543	24720	17100	19986	8172	15889	25003	16948	18940	9974	20830	15239	8215	10949	15708	12337	17699	14602	9902	7569	17054	14362	17429	8189	12927	12594	13522	6746	14547	9008	13328	22214	17417	15248	11029	7928	17066	7485	14138	5333	14071	5772	17868	17429	18433
32:30:59	32.5164	24484	21687	21915	23079	24763	18484	20218	9274	24560	17708	15379	22763	13649	27944	19066	14332	7966	11780	9358	14607	18535	11400	10468	15957	15581	20855	9497	16953	9674	13881	9020	14366	6999	13366	18484	19383	16003	9712	10657	16556	6307	16632	5312	16839	13033	12531	16670	19248
33:00:59	33.0164	17391	23290	29168	26889	19843	21214	21282	9927	17396	19092	12560	23927	8624	21877	17100	12991	8299	11847	14113	20847	17336	13075	11181	15058	14948	17362	8615	22147	9345	24299	14978	15725	7088	9577	14007	20877	16952	11877	10560	15822	11826	16472	6215	18231	10565	18345	16809	13978
33:31:00	33.5167	18214	28480	23936	23058	23058	23210	20201	13193	12569	25100	11261	17767	15345	18742	16172	12425	6835	6118	12379	12894	17716	13451	10518	22712	12105	21716	16315	19155	13615	18889	8404	17083	8375	16771	21438	21822	19868	11788	11919	18450	10484	14619	7788	15303	9442	15978	19649	16547
34:01:01	34.0169	27535	21607	21940	28058	28168	22628	18379	12147	13505	21037	12991	14750	11079	19881	17459	10008	12923	4768	13653	16117	18142	13020	13075	19256	15138	14218	11269	25877	14893	12345	12265	16134	8704	12151	16345	18750	21602	11130	12067	15412	7658	14510	8151	19788	13016	17488	17982	18180
34:31:02	34.5172	20628	19653	23239	24674	25472	16425	23839	13788	15843	12349	15645	14864	12687	19404	16864	16729	16307	4236	11527	22180	18379	15337	9404	17163	13058	21193	7843	12936	12261	22282	16872	10143	7877	18096	19163	21505	17476	9434	14113	15974	7628	16720	8831	18543	14180	18708	24995	14176
35:01:03	35.0175	17459	14404	31691	23396	19809	19767	19990	13180	15303	11927	14050	11750	15480	20003	16864	13923	15488	3987	15472	14450	18307	17674	5911	23645	17910	17619	11843	11290	12978	13653	21606	7404	9628	20130	21763	15488	21872	13147	13843	15855	14320	18104	8299	17421	9982	18189	14020	13134
35:31:04	35.5178	27472	18104	30227	31404	23505	26421	19695	16902	22476	16142	16775	21653	10185	29037	16062	8164	13016	5270	13750	12463	19674	15995	2979	26113	15265	20366	11683	11910	12539	20564	18223	19332	13337	19062	24433	21501	27809	11894	13535	13982	13375	17653	8603	15193	9784	17501	15366	16066
36:01:05	36.0181	27083	16974	25421	32117	25497	23261	21822	13780	22805	25307	15218	25737	14493	25796	19809	10797	9472	6953	15855	8970	18847	15459	3337	24045	20577	18130	12273	14535	13851	17805	12670	24598	7396	18531	27653	20653	25050	12480	12856	21594	11472	17623	7734	17425	10636	20298	24007	22670
36:31:06	36.5183	25586	25379	30733	36059	30101	29379	26075	12535	24788	20746	17058	29991	16628	19611	19868	7096	8130	7725	13269	10430	20817	15214	11493	24223	18480	23923	13834	21936	14805	15982	14130	15788	9455	21374	24277	26569	20535	14142	16134	17189	12497	24847	9619	19906	15472	20830	23944	25978
37:01:07	37.0186	27835	25066	32012	29434	31316	27379	25695	13480	25007	24180	17324	26362	15176	31079	18193	10252	6987	13446	14434	11349	22480	17978	19957	26704	25062	22265	11986	23379	14379	18488	12602	22358	10936	22969	30358	27341	9830	18691	18037	23433	7991	25235	8151	17716	16556	26851	24961	27822
37:31:08	37.5189	32063	22239	29109	35831	39013	33822	30126	12932	28105	23602	18362	27746	15370	30712	14944	11480	11556	16248	12497	13586	25548	23716	19265	24560	23151	24294	15877	26754	16784	20813	14117	20687	11046	16902	31075	23843	25476	16780	15383	21843	12227	23539	11071	15336	22704	19792	29113	30214
38:01:08	38.0189	32814	28826	30890	37928	33607	27961	29328	12607	30383	33936	18695	25687	23210	29083	15501	14404	7485	21298	12687	16083	26012	25037	20898	30219	26505	22298	13134	27472	17598	20315	17716	20788	9176	23286	37341	35426	37514	15948	16961	25906	16746	28109	11835	26995	21674	21860	26497	34599
38:31:09	38.5192	42093	25497	34991	34198	37924	29147	26788	13421	30708	24100	18421	32991	21598	44853	25569	15590	13522	22159	13573	20336	21075	21488	28341	31518	24244	26185	12029	24670	21016	27404	19180	25117	8793	28383	37578	33067	38498	16699	16096	25649	14573	24995	9763	18615	21138	22678	32780	26201
39:01:10	39.0194	39895	26856	39430	46043	40000	39414	32691	19877	32358	31468	20505	25075	16336	40506	27885	7582	19526	18615	18826	25206	30966	26075	26640	29155	27320	27598	13349	29282	23033	25138	14248	25134	13889	27632	27628	36936	44574	17391	18556	20231	13615	23855	11476	20733	27763	22168	24893	29577
39:31:11	39.5197	38894	33442	38093	40519	37337	37147	28716	18066	37325	36287	24045	22864	16088	34898	30611	12425	11358	16788	18408	18678	28176	41490	27362	36472	31484	30181	20716	36396	14062	25282	19370	23775	10046	20446	34510	35789	40633	20079	19197	22611	15860	30911	13577	22940	25404	29737	39894	21231
40:01:12	40.02	41768	28370	37759	41287	43034	45904	35202	20201	38852	31113	27809	33809	25704	38949	23391	18657	13349	18433	18223	16653	33776	29910	27261	37476	27109	31586	13012	31704	23075	31603	14666	27569	11033	24611	40342	48562	57138	25353	17320	35907	15801	29400	12902	28311	30607	23598	42620	23674
40:31:13	40.5203	30295	44764	41709	52053	35215	41068	33240	15041	38848	51643	23041	23885	25805	42777	38574	20328	22307	12653	21674	15539	29780	28012	36210	35480	30721	31316	17602	35126	21796	25256	18843	18446	9210	24666	38886	35054	45908	19370	27117	41308	18843	34316	13307	34856	16687	28666	42608	24704
41:01:14	41.0206	40312	31919	41393	44203	32400	49470	34172	20121	33358	42684	23801	23079	27379	38738	32185	21809	24459	19349	19573	15729	28662	37679	33046	36392	26590	31860	14265	33864	14151	27725	13780	14594	8881	22704	44604	37354	54420	19104	15995	28948	17792	30008	14505	25400	20978	33987	47668	27860
41:31:15	41.5208	39397	32029	39198	43980	33531	40650	38941	15678	36713	34670	32945	35240	25003	37924	31172	29556	20197	18543	25509	16041	28142	40620	33620	40135	31358	29514	10818	34683	18708	28636	22729	29240	8362	28248	35848	42654	59754	17438	17531	28691	21396	36620	14581	27839	25138	29510	41768	28510
42:01:16	42.0211	35995	42021	42608	44507	32092	52213	29455	22054	34957	42739	23788	26429	28370	43528	33797	20075	20493	25345	22463	13683	28185	33539	29446	37084	35008	31451	22404	34506	22408	23109	16239	29311	9877	31759	47862	37666	50039	19914	19674	30733	19573	40954	13223	26556	34501	27615	36261	37194
42:31:17	42.5214	40068	45005	40262	53276	33788	30147	37059	22733	37586	45326	29522	27978	25860	51398	36654	25362	20826	24881	23092	13834	29527	32413	25817	47250	29185	25488	16805	31197	15817	29408	16657	23940	10307	32421	35881	45629	65025	14054	19720	33894	18775	26235	12581	22130	25003	29995	25607	40439
43:01:18	43.0217	38540	32290	38223	44764	31632	46486	45381	20792	36168	26834	23775	19269	39198	44005	33607	24919	22012	18383	24729	27539	34793	38920	36687	38097	32345	19433	14539	25792	20505	30105	16054	33337	8518	31041	42848	41608	59108	19644	23024	26227	20712	36569	9868	15328	25349	26269	36215	37599
43:31:19	43.5219	44777	33607	41350	43072	34805	46545	39270	25851	34903	43161	28902	32447	33742	33679	37320	25767	17151	11615	24522	24341	30316	33198	42827	45351	31362	29147	10286	37523	15657	26885	21231	31999	13624	24788	35185	38477	54306	20720	21712	18518	23674	34316	14978	29965	17417	33442	29067	36481
44:01:19	44.0219	28594	44055	43195	44077	34603	29172	42840	21012	35122	35021	22834	32223	34198	39586	31619	16113	11771	14931	18185	20742	28164	33079	31404	33223	34755	27581	17969	27915	18341	24999	17417	22733	10168	17712	54572	41549	39038	20417	20033	27931	20674	33210	18125	29961	16446	26396	31075	24480
44:31:20	44.5222	43777	31489	47584	40743	37911	33493	39051	15505	34966	40574	21695	34704	39401	32936	34750	19476	11868	16320	23822	13674	17805	29079	31126	37202	34037	27193	11358	32459	12552	25581	12071	16117	11404	30476	40089	38624	48182	19421	18632	32839	16881	41249	12602	24640	12451	17467	37675	36358
45:01:21	45.0225	41625	30970	42072	43220	33312	22286	32147	15434	31978	45275	28235	34067	37945	47246	35143	24366	18687	19185	26311	15872	16134	36202	24619	32463	32539	27421	14223	22741	20092	28391	8134	13552	12780	35995	35392	25176	44165	15822	12771	32446	20374	19615	11311	19294	27033	29109	29197	33746
45:31:22	45.5228	45220	28953	37814	37168	33966	37734	28763	17670	30421	43275	23366	30349	32320	37481	32556	26391	15341	20741	21526	14843	15117	30953	11130	35696	29050	23881	12729	29231	12518	29375	11008	19594	8738	26088	41194	44055	41515	18733	17843	20682	14598	21780	13328	15801	31012	26805	32928	35835
46:01:23	46.0231	32708	37291	35937	39523	28615	29970	35780	18784	37278	29113	19471	27396	30375	29522	33265	26054	15425	16649	19990	24269	22438	30543	31143	28539	27033	25708	9548	25155	15750	18138	9510	33755	11873	26016	28168	40734	43768	14261	15818	16733	17218	21822	14067	13611	21121	24619	30202	24311
46:31:24	46.5233	26784	24054	34620	43393	29510	34181	21412	18383	29476	28581	19564	32012	25172	39000	29105	25602	13750	17687	19716	21531	13586	29957	22948	27391	26864	19885	11185	23801	8409	27417	8780	21914	12564	26151	31754	33105	40814	11341	16919	11404	17446	29999	9451	18425	13915	23125	23788	23931
47:01:25	47.0236	17965	25720	36025	35599	28885	27029	23864	15801	23817	20400	15269	16425	27915	31611	30518	23391	10949	18362	19885	23341	12050	21041	21729	25083	27307	22071	12438	15408	11982	14092	9843	16682	10788	29784	24050	27742	31619	17990	11261	9852	17412	17809	9615	18889	16834	13341	22817	26104
47:31:26	47.5239	31700	18923	34831	41161	26290	35865	32320	16860	37738	17788	21539	29168	25547	20995	28872	15995	12645	13948	18450	23003	6181	23986	15100	23012	23602	19277	8134	15041	12607	17353	9286	14514	9814	18936	25248	38620	36670	12189	15172	13185	16535	19581	10801	25172	13244	9978	17180	17417
48:01:27	48.0242	29725	19961	29982	47507	19657	31628	23130	17109	26737	26716	18320	23796	23007	18298	22784	14345	7282	9400	19138	19227	7666	17995	23092	21779	23383	20522	12716	20952	7818	16488	9198	9349	6274	25581	23864	26877	30404	11316	13708	9337	11489	10826	7691	19484	10607	24484	22817	15695
48:31:28	48.5244	20003	23201	35160	34599	21636	25830	23864	13767	26459	21307	15501	26695	18037	16374	25100	15412	5687	9970	14164	14071	6953	21822	25965	21353	21045	16231	7451	22256	10058	21632	8548	17872	6898	22543	24699	27931	29522	13075	12721	9071	12535	12678	7632	15670	7835	21341	18860	20218
49:01:28	49.0244	26050	26746	37717	33295	20682	25784	24906	13256	21678	21893	17978	23834	19952	24476	12472	15560	5333	12590	15577	19117	5392	20003	16560	20522	20556	18206	9594	15442	8881	13256	8805	13324	7358	20813	21358	28699	28636	10738	7320	18623	10328	16784	7025	13273	5864	16573	20054	17172
49:31:29	49.5247	15062	14379	31472	34101	22062	19864	30581	13619	29033	24704	13843	15066	23269	27826	24923	13016	9695	11138	12235	19185	7345	19704	19611	14552	12805	18712	7531	16214	10594	16906	8269	9227	4848	17054	18657	22784	27813	12438	7071	24024	13147	18729	6054	20564	5413	19543	18898	16906
50:01:30	50.025	13058	11725	35662	29919	23273	23147	20172	10316	23784	22514	12961	26316	19113	24543	18130	13071	9417	8615	19138	17450	7793	22560	11143	15341	14058	17294	10041	12476	7472	9071	6552	18290	4109	18298	15851	21822	28286	9674	6489	21206	11058	17678	5683	11856	7649	19767	15509	14269
50:31:31	50.5253	20290	12961	29873	31552	16201	18965	25446	9940	17632	24375	9923	16134	13699	20965	21273	11332	9970	11527	15708	16518	6303	17387	14096	13678	14370	13640	6307	13645	7130	11008	11392	12560	4924	16585	16522	15801	27189	7582	5683	16919	9299	18273	6181	10746	9860	11446	16598	8417
51:01:32	51.0256	23223	13488	27999	38443	24286	21948	17569	7269	20657	26792	13999	22214	15353	14881	18839	9371	8463	7236	11632	17092	5021	14767	11134	14210	10400	15581	7582	9615	6653	10400	7164	8700	4240	13919	15619	15045	22640	10189	5827	12290	7219	16881	4869	11370	8151	16948	18033	6442
51:31:33	51.5258	16328	13172	26041	31691	20670	18311	19033	11020	21463	31181	10624	18910	14518	20260	19509	11210	8636	11505	9590	16071	7590	14459	10683	15071	10923	12847	6063	13864	5295	10619	6594	8193	3936	14134	17311	14315	21514	7982	7788	9767	7497	14324	4384	12075	12231	15969	19598	6535
52:01:34	52.0261	20374	12256	24969	21986	20948	18585	14590	8864	18033	23062	10527	18033	9784	18294	19704	8767	10387	9050	9712	15931	6468	13206	9236	10138	9982	12564	4202	10632	3898	10206	5548	17290	4848	15611	18704	15332	20450	8033	7396	14826	7282	12577	6472	8700	9468	15678	18113	8970
52:31:35	52.5264	15324	11653	25543	21978	17902	18176	20066	8978	14847	22138	9295	21598	11016	15877	17265	9733	7586	9995	10425	14096	3898	11957	9088	11949	8459	13788	6835	7759	5392	9109	4611	15370	3936	11446	15472	14324	17995	7210	5160	13948	6113	11843	4641	12704	6392	14931	13353	7636
53:01:36	53.0267	11628	8835	22472	23725	24235	15539	11974	9016	15775	20965	11252	10776	7864	15463	14775	6088	8117	6936	10889	11400	4067	18003	11332	13725	10877	14155	6653	7320	4379	10527	4595	7666	4257	11961	16670	10725	22303	5898	4164	8139	4649	9333	3641	11919	6961	14923	16851	5974
53:31:37	53.5269	14033	9366	19598	23185	23134	15817	14556	10400	13894	16442	9666	15720	10168	16927	15210	7506	7316	7160	9771	8223	6759	11615	11273	12476	6527	11818	5004	13429	5443	8177	3936	10919	4303	11657	16830	11400	14927	5839	3907	12940	5869	10716	4476	9155	6864	14763	15902	7075
54:01:38	54.0272	9581	9852	22953	18442	21948	7911	11105	8244	12539	9349	8801	16767	8898	14455	16725	9662	6649	7974	9868	4911	6987	13847	12868	14885	9890	10160	3426	12349	3932	8155	3915	8046	2599	11763	17244	13834	18999	5860	3936	14239	5173	10008	3287	7278	3898	15881	14518	7497
54:31:39	54.5275	10628	7999	21231	7687	18189	13974	14801	9569	13290	14543	10286	10940	9020	13615	12467	7734	5974	6890	8835	3371	6333	11615	11349	16096	8611	11307	5881	9286	3464	9506	3789	7358	3860	9902	15033	13780	19265	7029	3249	10514	4135	10257	3426	8425	4645	16307	16649	7160
55:01:40	55.0278	8050	5983	15847	15999	17366	11708	10822	7894	14193	19185	10421	8999	6949	9539	15725	6206	6097	6329	9628	3983	4708	12552	10531	12472	7873	13834	7514	7080	6130	10493	5506	5907	3278	10164	17193	13670	21117	7215	3569	5974	3763	10733	4017	6928	4637	8366	14092	7193
55:31:41	55.5281	8472	7210	21438	17809	13476	11573	8299	6810	12041	19294	10569	13096	7809	13615	13425	7426	4877	6848	7430	3472	5746	14261	10991	11227	8835	10316	6130	12088	6350	9143	4590	6181	3717	10345	13307	12493	9894	6476	3831	6358	3633	14598	3548	4493	4476	7291	11476	6902
56:01:42	56.0283	9522	10594	25552	16467	18125	17682	9151	9210	12759	14303	8670	16020	8636	16366	16484	6940	4755	8054	8455	3485	7274	11235	8054	12737	9172	14615	6442	11678	3658	9877	4519	12839	3232	10046	15982	10641	19851	5181	3481	5915	4679	12889	3789	13307	5637	11915	11227	7459
56:31:43	56.5286	9383	10278	17100	18834	15442	13248	12894	6506	11058	15881	8215	9366	7894	11446	13767	10181	9615	7881	11235	2527	7721	14450	10387	10531	6135	15151	6198	8396	5400	9063	6240	14379	4257	9134	11193	13299	22623	7755	4105	12948	4177	8523	4400	9657	6160	7021	16822	10404
57:01:44	57.0289	7881	6084	18560	20742	18847	8350	10084	7759	9902	15421	7953	9497	8847	13978	18978	6637	8139	6189	10847	2434	6687	12936	8544	11210	7923	12105	5654	8746	4641	4675	6810	11974	3519	11746	14425	11497	20615	6649	5902	8455	4734	8902	3768	9468	3970	8603	13404	10413
57:31:45	57.5292	7476	9147	18826	17742	20185	13197	10459	9590	11058	15332	9569	14252	10227	12695	11771	6464	10320	7725	9274	8396	9493	13328	11181	15159	7869	13543	7286	8387	7632	5514	6552	13109	3519	11413	11514	12138	22079	6594	6409	9847	6472	13902	5417	14438	5616	10911	8560	7552
58:01:46	58.0294	19265	9063	25391	15480	13189	10345	14864	12219	10265	14510	10227	8151	11700	15185	14307	6286	10240	6489	15493	5565	8489	13510	11185	10543	10020	15729	6215	8210	4595	7430	6253	10780	4118	9860	13809	14062	23915	7329	5924	10974	6143	13265	5485	10953	7185	8611	12138	7902
58:31:47	58.5297	12898	10366	23252	21733	14974	11273	12379	12235	13227	14750	9936	6945	15607	12265	16425	7805	12628	8966	13379	3578	9522	15885	12586	16075	11522	14953	4831	8514	6881	8198	5586	5628	4012	11716	14337	15822	21256	7303	5147	9278	5590	12240	5025	10691	9198	9358	13143	9278
59:01:48	59.03	10020	9864	20940	17780	19256	10729	16982	13037	12649	16252	10712	12763	14121	13024	18695	7324	12451	9138	14218	4708	9126	15387	12826	14092	9409	14197	6037	10552	9868	8151	7645	10117	4582	11181	10649	17678	23488	6278	5708	6531	6071	10839	5624	9113	8147	9776	15239	9113
59:31:48	59.53	11999	7831	27586	13716	17695	8594	13438	10902	16294	11607	9666	14906	12759	11784	15041	8075	13860	9704	12375	6510	7974	17079	12839	19256	12729	16294	6919	7691	9265	10991	6350	9902	4126	12834	13079	15851	22421	6459	5189	12244	6177	10611	6118	9497	10029	8662	15223	9063
60:01:49	60.0303	10843	7974	30172	27704	18826	13653	19927	11940	18682	12244	9290	14151	11282	17526	12185	8202	15079	10016	11556	9252	7738	26666	12894	20691	10641	20298	7902	7544	8109	11341	8539	5827	5413	15134	20826	17619	24505	7286	7801	11168	7164	18286	5632	21180	7021	10210	16189	10573
60:31:50	60.5306	15142	15594	27598	20742	25168	15699	18931	13607	19028	13674	12227	13594	19206	15944	15775	9590	18543	15493	18214	8042	3599	18256	12320	23286	14164	23830	7750	10868	9189	11109	9468	12915	6168	16948	24978	15197	27379	7809	7620	11408	5827	13083	5607	13328	10181	15805	15164	14826
61:01:51	61.0308	17843	11497	21290	24763	31624	21484	20509	11235	18210	13214	14742	20834	17940	20282	17834	11387	14936	16484	18995	5966	7755	25974	17176	18615	15383	18248	9493	12974	8894	9307	7037	19408	6493	12712	21007	23012	20902	7961	5004	11126	7666	19058	5742	18750	9691	10231	12581	13041
61:31:52	61.5311	14543	10354	26569	27138	23881	12265	14826	16214	19450	19121	14788	15737	16324	32362	25265	10691	20336	11075	15016	5632	6472	23670	20974	29468	18033	22691	12181	10130	10075	12560	15066	14936	6105	14590	25370	18324	16037	8362	5240	17910	7008	14636	7274	15910	10666	11438	18104	12164
62:01:53	62.0314	14763	14619	27851	28071	28463	19569	17720	15239	23058	20990	15978	24623	17547	26121	23851	12261	28881	10328	15387	8240	7999	27585	23931	25066	15522	22902	9704	19087	10278	16362	7375	15649	6282	17366	23868	27716	10299	9029	6700	19860	9468	17493	8396	21201	13050	11957	20134	11919
62:31:54	62.5317	22644	16096	34632	34645	31333	25493	21657	16075	24185	24341	16881	23931	27931	24083	30894	16235	22695	13750	17421	12379	10248	28003	25210	22860	22817	19374	11548	26100	10421	14931	18370	13151	7025	17396	24855	15872	34750	10113	7202	17855	7160	16429	8906	24079	16476	13763	19872	12632
63:01:55	63.0319	24037	19746	36751	34451	36502	29109	15476	20767	25986	24172	18509	19033	29467	32067	29463	18644	21590	29932	26231	11294	7772	27218	35649	47035	15075	17147	12147	16239	10417	18509	22666	17168	8113	17965	18644	28699	41890	14661	10518	21227	9535	26163	10430	23172	12594	15100	22417	14674
63:31:56	63.5322	19813	19282	30261	33987	29986	20632	24995	19729	25645	28514	19855	17843	24256	24775	28877	16286	22965	15927	20889	14062	12590	23366	30467	37203	16995	24704	11666	18239	12784	15906	23695	19260	8607	19978	29822	34177	44802	14379	9202	21336	9497	18197	12037	21893	11100	14007	22117	17577
64:01:57	64.0325	29775	21003	35755	34856	30206	29088	24611	17054	23623	27269	21201	24105	29784	36037	23940	20952	25446	20471	25657	13750	6818	15704	29505	34211	15889	23142	14066	18792	9417	16446	18218	25906	10164	18159	27674	27602	47908	15509	8923	14510	15906	22851	12737	20995	11978	15944	25155	18362
64:31:58	64.5328	26598	17969	35856	29362	35869	19332	32835	19691	25771	30944	24155	20830	26961	32949	39063	16674	22881	26780	29067	12906	8527	27413	36320	47714	20653	27096	12978	16391	11695	14307	14754	24535	9852	24159	34577	32548	61071	12687	8911	24881	13408	19666	10455	21324	14522	18514	25868	20788
65:01:59	65.0331	26919	12527	42439	38544	40447	19109	27366	20370	28657	28497	24986	24872	29678	36240	35156	19028	31160	20969	24379	14754	10716	33489	28375	34105	18661	20754	14147	18020	12438	19459	15695	20948	6232	25657	29602	33252	53622	15054	12210	26986	15126	19151	9037	20075	17307	21324	21531	24201
65:32:00	65.5333	22311	12666	40941	31472	33961	21016	33210	23607	27096	24345	23716	28995	32193	37409	42055	18307	24978	26893	20750	15303	6818	40097	36607	41097	17923	26607	11425	22805	12463	17788	15834	18598	7071	23539	27721	40945	48419	20117	10092	23218	12797	22109	14033	21936	17412	21134	23771	15708
66:02:01	66.0336	22531	13126	27240	43878	28873	18391	32316	16261	30670	30501	27387	27324	32493	41380	38607	19720	28029	31033	28640	16763	5843	41422	42587	53091	20796	24872	13775	27796	10092	15493	11476	20640	8252	22801	13417	29822	58686	17801	7413	18704	10096	21248	12105	18522	16552	21598	24763	22484
66:32:02	66.5339	31181	10573	42389	27742	43135	29805	31459	21459	31003	25649	29164	25438	28488	37768	32282	25016	33966	24843	21573	15358	6345	32780	34911	68360	19640	24227	15041	17809	12653	12472	17817	19881	7113	19092	39017	30392	31560	14657	12978	27615	12708	26071	12083	23792	11332	21024	23952	20889
67:02:03	67.0342	33890	16877	42190	30923	35687	25421	26624	24839	31632	35135	27307	27358	33523	38945	40709	23286	29704	23400	24615	16282	3628	32033	35590	49208	26176	24349	10176	24581	8523	12480	12919	23210	11400	16678	38270	34282	50153	11024	11130	28687	13142	28834	11826	19180	10577	18387	18834	25345
67:32:04	67.5344	36181	16999	33012	31240	32337	21320	30577	21488	29349	41688	27155	25332	35696	44085	34084	23024	31877	25417	26881	13594	3911	29518	30438	50812	22370	22345	14493	18961	11231	8265	13214	20771	9269	22417	32134	32700	51482	12797	10358	19429	13341	29746	9717	17214	16822	17796	12164	25459
68:02:05	68.0347	27003	16315	41844	29075	35721	29636	24387	19885	23986	32417	28864	16712	40122	33945	39595	20180	32624	26733	21130	16615	41219	43380	36974	46258	21957	23535	13586	25974	12054	21159	22670	18779	10560	21467	28404	34881	45296	13159	9978	21185	12902	21349	6679	16286	11299	21446	21193	25396
68:32:06	68.535	28345	13716	41325	29459	29489	16801	23526	19923	24927	38671	24429	17345	32472	34734	34624	29328	27856	28995	20450	15623	16826	33674	26691	29109	15830	24028	11016	19872	9974	19763	10986	18628	7691	25725	38780	30868	48094	10522	8911	15695	13218	18902	9885	15442	13155	21206	28438	18801
69:02:07	69.0353	22020	13556	32253	35324	31071	21100	26982	23417	33835	27556	25531	26906	32219	31223	27037	19881	35362	28315	24050	14607	28079	24619	30809	34987	27594	19602	8265	18919	7620	14016	12552	26704	10868	20374	19923	28083	40928	9227	9978	9303	11830	24775	9155	12113	18400	17585	22282	21792
69:32:08	69.5356	41034	10349	32607	33767	36076	23298	28759	22556	23349	31434	20763	23417	38696	39574	35438	22590	31687	28640	23720	12543	23041	33193	33932	44237	16083	20674	11695	18906	8523	17754	10771	17817	8248	15400	28999	21147	43650	11046	9189	17054	10109	17147	10290	19855	23522	14708	26792	12349
70:02:09	70.0358	32261	12877	34654	22826	28590	28995	23455	19666	25695	20412	25910	23691	25552	39717	35286	20223	29278	20712	25974	12594	27813	31510	33303	54905	18792	22488	11041	17383	10586	14100	14585	16050	8164	17277	28488	25758	32890	9303	12396	18552	13442	26543	10016	16813	14159	12834	25109	14547
70:32:10	70.5361	20261	17737	34641	21172	29497	17176	24830	20336	24488	31531	21796	21476	27906	37671	33759	20969	29640	22387	21210	10776	27269	30227	30771	30033	15649	22282	9274	16273	6734	16037	12370	16839	8523	22750	18986	17180	41726	11590	8729	19830	9881	15058	13016	18780	17185	16834	18952	15104
71:02:11	71.0364	18602	13725	26294	17919	21594	22210	15218	19581	18547	22594	24754	24366	35687	34282	29995	15602	29480	24020	21349	16012	23763	25978	25965	32805	14830	18488	9210	16429	7366	10109	11501	14818	9185	14408	20113	20442	37227	9586	9522	27164	7426	19391	12265	11505	11674	13320	15640	14868
71:32:12	71.5367	18577	18020	35717	22514	25539	24826	18311	12695	18269	19058	20573	17788	20387	23328	28531	20763	19455	22239	18484	15463	28746	26834	24239	25657	17704	13796	5919	12881	8012	5054	16826	8366	9155	22923	12016	25235	38434	12628	8042	22670	11396	25552	13003	12699	11674	16982	23771	17889
72:02:13	72.0369	27105	19412	23159	24948	22995	13864	20446	17459	20543	20695	17484	15969	23818	17472	21104	18674	30383	21260	15940	16923	22990	27678	21518	21412	13590	15872	8590	15391	10025	15796	9978	7404	5966	18569	26889	18142	38076	10206	10518	20509	11708	12674	9687	12375	14910	16813	20543	16708
72:32:14	72.5372	24898	17758	30468	31223	23518	20227	22754	18450	21176	17619	20518	17594	14936	27354	20539	13345	20598	12923	16982	14944	20830	21514	23151	25434	14130	15678	8653	18206	6084	15493	16379	15138	6004	17121	18109	17860	35063	10181	9978	21860	10569	14683	7358	13670	12429	13155	17277	19003
73:02:15	73.0375	27197	18801	32898	27767	26269	18096	24615	12050	16611	21168	18387	17311	18071	20366	18986	20045	16041	15847	16062	9885	17632	22531	20433	28691	13421	20552	9776	14893	7949	10349	12206	16455	6413	18214	21779	19860	31092	12805	7312	16282	8712	14244	8974	8818	8042	17788	14396	12733
73:32:16	73.5378	26223	17020	19813	21640	22995	15674	19050	14235	18033	21674	16476	19353	16535	22834	25159	13961	21931	15223	16273	8480	13159	13758	14602	25210	12906	19864	8582	15472	5767	10349	24239	15518	5746	16817	26273	17535	32666	13628	8953	16796	8117	16868	10476	8046	9729	17809	38299	13020
74:02:17	74.0381	18493	23071	23176	20813	23298	17079	18142	12999	15374	20509	16788	15054	20193	30185	20708	16066	22028	16290	17919	8991	12813	23223	17138	16767	10763	18480	8632	13147	7607	9151	10915	15590	4535	11088	16729	13733	29581	9164	6611	15809	10240	13299	9539	13514	10290	14923	21024	10484
74:32:18	74.5383	17547	17362	25303	20543	25151	15054	23995	12662	19974	24197	15505	15628	16860	22906	22695	16126	18218	18045	17674	11518	15100	21442	20383	18801	11864	16733	8485	12130	5341	8594	9843	15121	5337	8885	13421	12231	30784	9936	6738	15408	6341	13910	8911	12864	12564	11986	21855	9636
75:02:19	75.0386	18552	10451	25134	19332	18653	11670	15142	12514	15003	28438	15104	14649	11151	20826	18535	15510	19121	17830	17307	8050	11733	18206	20307	23615	9691	12733	9434	13109	4388	11999	11172	14033	6324	15716	12792	25910	25218	9911	7071	16311	8957	12324	9252	10476	9269	17691	12029	9949
75:32:20	75.5389	13488	16239	23556	18602	22944	15826	13210	10092	16096	15636	21210	12037	16746	22564	19961	17130	17193	16915	14687	10771	11514	18809	19455	17324	8063	10265	9590	15792	7193	10784	12636	12164	5329	13822	8649	13037	17007	7750	4962	13809	7358	13484	7856	11337	9569	19817	8894	10324
76:02:20	76.0389	11539	13995	21488	18644	20919	15227	17733	10354	15564	18075	13303	11505	21087	19952	20024	13847	16020	15058	12231	12130	11143	17699	23623	15501	11784	13771	8421	13218	5206	13792	8847	12518	4717	9138	5215	10522	20185	7303	7898	11467	5291	14045	7721	11839	7721	12619	17898	7535
76:32:21	76.5392	17763	13623	20134	13560	16007	17336	13231	9489	13965	13223	15362	12278	15121	18552	19978	11573	11370	14771	13320	9788	11265	15066	17227	24560	10510	16028	8531	10543	4797	8607	10240	11632	4426	7573	22324	8379	26493	9185	6885	13109	5097	9265	6468	9873	6210	10792	21155	6156
77:02:22	77.0394	17919	12008	24699	15750	14645	12830	13708	8944	15623	8881	13535	8873	15054	16607	13746	12434	14029	13780	11429	11974	9379	17611	19830	22636	10455	13586	8987	12889	3962	11303	9468	9198	3637	6464	14484	11974	20062	9164	5248	12446	6261	14594	6987	7620	5721	15771	13910	6586
77:32:23	77.5397	14585	12404	20353	15712	20054	10611	10915	10417	12611	12586	15341	11050	27636	18256	15948	11489	13206	11126	10645	12598	9295	15535	15383	19387	11565	9708	7438	10750	5704	16028	6552	9974	5472	9480	17362	11569	12362	6291	7725	8666	7253	10046	7244	4194	5286	14252	10303	6350
78:02:24	78.04	15463	9944	21590	19839	15142	14872	10906	7354	15472	18083	9008	10940	17193	17180	18737	10261	13096	10016	11143	11687	8544	15197	12552	18366	7738	13923	5392	7324	4168	8139	7042	17041	5481	10573	23033	13978	8143	7767	6949	13991	7172	9982	6734	3223	5379	11164	15079	7940
78:32:25	78.5403	12611	11003	26235	16518	14362	11970	7156	9657	11219	16442	11159	14505	16324	15193	13408	12320	10235	12619	9889	13033	7046	16526	10712	15176	9371	18957	5527	9248	6270	7725	9417	13147	5384	11054	19151	8936	14083	8560	9906	10316	6725	8392	6902	2185	5299	13695	14683	6198
79:02:26	79.0406	19328	16412	18442	16379	12446	9274	13763	7814	10244	18843	11657	9560	14282	14826	12092	21813	10231	9923	9354	12961	6329	13067	16434	17387	8687	11704	7042	12906	5143	7202	8556	10923	2928	7877	9809	7552	22480	5793	7337	8885	4865	7742	5594	1970	6244	9134	12071	8025
79:32:27	79.5408	16653	8371	20134	15434	11210	5713	10826	6831	9818	7552	14383	6839	16644	13505	12143	9387	10889	9754	9037	13522	7134	14303	13687	14729	9489	14982	5772	10615	6814	9020	8695	7991	3890	6371	8674	7995	15147	11016	6442	10991	5991	11451	6054	13927	6615	15223	12467	5919
80:02:28	80.0411	9712	10961	22864	13029	12948	10303	13337	7286	8987	14898	13273	12510	15028	15754	13590	7991	14391	9522	8012	12261	6607	14986	11784	17619	9096	15315	5164	11759	5324	13138	5421	6312	4114	11678	14640	7881	17923	6658	7160	14615	5856	13370	7936	11716	5143	12235	10767	6556
80:32:29	80.5414	9164	8143	23552	15518	13586	16345	9160	8506	9160	15754	11219	7493	14729	16801	9484	8227	11138	14881	9286	10805	5700	14092	12197	15244	7831	18944	7738	10168	4409	8864	8117	8666	3882	10552	16252	8080	19674	7784	5523	11565	8400	10493	5388	13767	5725	16261	15459	5088
81:02:30	81.0417	11358	14134	11176	12721	9155	12957	13332	12278	8383	18012	10805	4346	13691	13404	12514	7772	10147	12185	12046	11775	6468	15607	13366	13522	7961	13273	7202	9501	3582	7535	9105	10223	3510	11370	13860	11489	18704	6240	9809	8902	6843	10573	4936	11332	3890	13189	18784	12670
81:32:31	81.5419	17370	12839	10750	16180	10379	11510	11932	9181	12915	14235	11261	15948	12932	12316	12075	8733	7628	8653	9455	12413	5603	14303	9645	21307	8535	15446	6632	13324	4578	9788	8058	7231	4388	9493	11105	9843	19324	6409	7160	10295	6253	9206	5223	9822	5379	10345	12801	10556
82:02:32	82.0422	13978	9231	19590	23877	17345	10636	12636	8590	8050	10354	13818	10484	13623	11024	13927	8919	11813	9480	10746	11590	5999	12687	13758	19412	8666	15007	8164	11480	5654	7793	6696	6898	4637	8105	6738	8750	20130	6966	8666	20248	6177	10586	5814	8704	8295	7172	8392	8177
82:32:33	82.5425	9611	7404	17657	13130	10269	11615	10257	7426	11370	11193	16408	14809	14269	12771	18104	9008	11792	12248	11105	11442	4852	9096	16847	17628	9033	13839	10404	9949	5822	9050	11552	9632	5346	12438	16940	12683	17104	9092	7607	11037	7691	12231	4400	11400	7160	16569	15083	10636
83:02:34	83.0428	18045	11771	17505	16826	10818	6552	8312	8345	10864	13851	11556	9839	11294	12940	17058	11341	11105	8375	11387	11628	5873	14674	15493	21239	7780	12839	9193	9868	6067	10822	7421	10780	4725	12923	14273	14045	17822	8033	7455	9940	6274	15375	5046	9434	5983	13202	13640	9084
83:32:35	83.5431	16936	10590	13379	17100	13560	11155	14231	11493	12185	12586	10982	9742	20927	13387	12881	10603	11944	13341	9809	11392	6105	14851	14412	18990	8733	13290	11299	14315	7101	10176	7809	8906	5527	14024	16657	10936	18130	5464	8447	11522	8012	10421	6337	10303	6270	15142	15134	9957
84:02:36	84.0433	10700	10678	19712	15742	12670	15683	15438	10691	12910	12088	9084	13320	13712	11716	11809	8885	11155	11725	11248	11700	5312	14771	13607	21885	9075	10864	9577	12273	7970	7388	7999	13712	5206	15497	20358	10965	16843	7750	13632	14830	8379	7501	7147	10818	5493	10210	20328	10079
84:32:37	84.5436	9219	12438	19670	12501	10206	14442	11366	8046	13602	17349	12552	14936	14277	16944	14189	15138	8847	16834	14387	13273	5308	16497	16130	25543	10463	14379	10700	13826	7282	9244	7628	10763	4185	9944	18552	11881	16252	6535	10556	11915	11172	8092	7033	13687	6333	16223	16687	10476
85:02:38	85.0439	10484	8902	19995	14303	11624	10278	11430	12168	13505	11181	11430	10316	17235	13619	13143	11096	11864	10581	12995	13096	6700	11662	14720	16615	12214	14387	8746	15096	8193	10615	17210	11835	4485	12733	13092	13235	18872	7873	12083	13450	8577	6278	6607	17189	7404	17100	13721	14704
85:32:39	85.5442	18754	13180	18653	17746	9814	9641	17476	10645	11885	10375	12442	12278	18809	13379	16235	9615	8953	15712	14012	19227	5966	17315	8101	23501	12425	17581	11455	13054	9459	11362	7907	7932	5738	14632	16986	13421	19737	6801	13476	21299	8742	5856	8894	12847	5042	18400	16961	15045
86:02:40	86.0444	13029	11560	22910	14012	11594	14294	10079	9978	13324	18248	12155	11370	16016	14054	14953	13830	8096	13661	15847	14248	6088	13003	13763	29586	10982	17429	11463	15050	8215	11653	7345	7620	5818	11143	21315	15370	20028	6691	11995	11754	10788	11771	7156	10434	10438	13311	12041	14573
86:32:41	86.5447	14117	11674	24455	19488	14265	14484	14488	9970	12653	18176	13581	13560	13240	16223	17438	15197	13581	11100	18168	15197	6421	12164	11923	34084	10615	17277	10003	10299	9721	13248	9185	8712	4257	14455	20201	10392	21712	5797	11577	14126	10666	16079	5784	11282	9636	13391	13577	16868
87:02:42	87.045	19573	12210	24986	16366	18163	19012	17623	9282	15822	15463	14619	14155	21429	13767	19927	12619	24623	7497	16725	17940	10759	17277	14813	32345	12269	20986	12754	11269	7202	10505	9598	11189	6088	14299	26851	12391	22948	7767	7122	17775	9788	16345	6683	15510	9425	17615	15303	19172
87:32:43	87.5453	22484	15531	23805	20374	18556	22881	16374	11024	15893	16687	15611	16472	20649	15147	20231	19522	19256	12868	23598	15480	10079	18547	18282	34742	11615	20130	9957	14830	7772	14729	8733	13185	4843	12860	24581	11805	19990	6814	9721	14792	9514	18003	5016	14560	11894	16826	10763	15231
88:02:44	88.0456	16573	19147	23767	16079	15434	18155	15505	10556	14678	22632	17733	23860	20109	18012	16113	15117	22164	16282	19864	16974	10497	21906	19003	34666	12581	18088	11860	14556	8071	12834	8999	13623	5708	13429	20045	11636	14885	7223	10763	17024	10337	23336	5198	20037	10155	13586	14151	17290
88:32:45	88.5458	19817	17455	27109	25231	17649	17982	16653	18780	14771	23476	18910	14691	17628	18467	22471	16235	22130	18531	18746	14282	9581	18796	18303	33299	10514	20775	12109	16121	5122	18830	11505	12113	5405	14843	24585	8822	11151	8603	11214	12645	12003	19493	7632	11434	8877	16851	17801	16628
89:02:45	89.0458	24463	17303	30350	19687	18927	15560	14632	9915	21818	20969	15982	17349	18298	15657	18670	15463	21062	18197	24594	15569	9198	17522	20366	34658	13847	24307	9413	13851	8620	12982	11522	13632	4987	12155	15088	12640	7856	7902	11645	17421	10117	19691	6063	12117	8906	16336	11548	16045
89:32:46	89.5461	20885	16826	21058	20050	20632	22678	20725	13737	16484	19623	18623	18100	21754	19982	18446	15670	19037	17573	18349	14780	12265	21260	19201	42186	11662	24526	13691	12978	8122	11299	9168	11231	5459	13716	18864	15733	6518	7231	9565	18535	11674	19839	6801	13792	5721	18311	10084	18050
90:02:47	90.0464	26341	17336	23860	21467	22261	22564	15801	11645	15826	21315	18012	18260	20644	16543	18606	16400	17366	17733	19552	15450	10117	22902	19847	35983	11489	21788	11944	17628	9514	13484	15185	9860	6240	12375	18231	12337	30033	8257	10176	24759	8274	17644	9371	19725	8995	14725	15155	22421
90:32:48	90.5467	18708	15944	25564	21741	17843	17860	17442	14185	18180	20142	16915	18425	23210	19606	22564	20644	21282	22429	18024	15484	10231	19290	22505	35637	13126	17315	11645	17362	8944	13632	10691	12294	5312	14092	18400	17978	41637	11290	13294	10750	10282	14860	7510	10290	13552	16881	19476	17425
91:02:49	91.0469	15104	24113	27733	20134	20484	24560	20033	13337	18341	10244	17147	20936	17349	18889	20349	17180	18893	16290	19990	17088	10214	21438	20307	34945	13020	21826	11657	17480	7742	14733	10902	13619	6839	14488	24518	14007	31801	7447	10181	11915	10223	21282	9413	18442	9999	13881	16940	16965
91:32:50	91.5472	20142	19387	27771	18016	18661	19294	14079	16780	16843	19269	18142	17712	16940	22071	21594	16737	18463	19687	16868	17130	11349	20763	21075	40532	12716	20864	13775	10902	6653	13531	12704	14315	4936	10792	24387	18163	27801	6092	12273	10138	13218	15320	7531	10164	7307	12805	17168	18100
92:02:51	92.0475	23965	21784	22543	21134	21088	12978	14299	14488	17379	22307	20467	14611	26007	19459	21948	17248	24923	16729	19522	17248	12366	22611	26033	28653	14189	18885	11826	16328	5291	14915	11708	13400	6320	16033	23303	20121	28240	6653	10936	10506	9278	18193	7016	11290	14218	21497	13075	16573
92:32:52	92.5478	21834	13375	30890	22374	16809	15294	18699	12408	16910	25754	19324	11957	24206	22332	21303	25193	25349	21311	23442	15927	11982	20349	18868	29797	14062	20801	8712	16467	12299	11830	12337	12771	7160	15210	28421	16535	21400	9387	9809	17218	11560	18771	7333	12143	15370	20733	17509	16206
93:02:53	93.0481	21282	19155	31649	22682	18809	15362	16564	12834	15547	22083	21062	18936	22805	23843	18522	18425	22602	18142	19147	18168	11847	21666	21239	36177	12598	20974	11527	14898	8282	9641	9071	13974	6506	16936	18113	14796	26349	6750	12974	18931	10100	27235	9750	11687	13885	19180	21104	13522
93:32:54	93.5483	25467	18446	24881	20518	19235	19012	9341	11586	14467	25037	19716	16404	29202	20151	20442	17885	21282	23400	20805	18020	12003	16269	15708	42490	14535	22944	8805	15969	6426	7759	10657	12290	6497	16180	20197	14889	28442	7801	8628	18560	7459	18788	9206	12206	10856	17611	11573	11092
94:02:55	94.0486	16581	15400	26240	19180	17408	14434	15303	14936	15358	23758	18277	13197	28041	23092	20176	14716	18286	18817	19404	15623	10995	16037	17079	41401	12860	22172	11130	11404	8063	12645	16172	12012	7215	14024	24839	16902	21649	7539	10518	19387	4025	9160	8961	11700	9463	14130	16425	16442
94:32:56	94.5489	29037	16425	29949	18611	15493	16872	19104	12881	13362	21860	18539	10957	18303	23493	23531	20585	18547	17653	20746	17125	12235	17066	21864	34134	10657	15218	7957	18332	8691	12341	18813	12628	5084	17585	27147	10615	18741	9809	11324	23450	9088	18404	11197	11219	7561	11953	14315	18931
95:02:57	95.0492	21670	18252	24632	19463	17476	16763	18716	13809	13602	24315	19459	10759	29666	16801	19315	18644	22877	20197	18636	16345	13531	21075	21425	29645	10873	11244	9995	17687	5303	15294	11383	14037	5670	17569	22391	10025	26974	7696	11404	17889	7641	16037	6354	11227	8982	22526	15075	15193
95:32:58	95.5494	17986	15750	18341	16948	16720	18687	14720	13767	12425	22881	17813	16244	24379	22117	20995	18016	18003	16915	24341	15201	11278	18632	22497	34168	8582	21518	8864	13649	6265	14733	11721	13767	6270	14062	23408	7624	27623	9362	10286	14847	9577	16256	6594	12860	7662	21282	15476	13619
96:02:59	96.0497	14514	18252	21298	15155	20252	18206	13721	10463	12391	25193	15780	14780	18855	17539	20632	19087	19028	18412	21222	13514	11906	15079	18374	34257	12261	13670	10603	13818	6135	12801	13552	11560	6459	15547	32172	9784	18569	7535	7746	16505	8822	25417	6426	12792	7265	22450	10982	15986
96:33:00	96.55	16168	17868	20235	18020	12784	18868	17784	15180	13611	18358	16796	14796	20712	25282	19843	15645	20585	17442	18083	16366	11742	12370	16467	26767	10075	17944	8805	14168	7636	12227	18902	7371	7936	17754	25805	9607	25585	5620	7185	14117	9409	16931	6316	10147	6793	18054	13244	13577
97:03:01	97.0503	19830	14948	16012	25332	13729	18691	15387	7717	14248	22189	16535	16488	22007	17919	16058	16771	16995	17362	16569	13653	12092	15712	19653	19121	10050	18657	9349	13071	8029	11556	8843	11413	7206	13969	24644	9902	24543	6324	10227	15113	8523	9307	7139	7725	9320	16758	18425	12725
97:33:02	97.5506	17417	17569	23893	17535	16607	25092	16780	11961	12767	13877	14417	18476	18851	13391	21784	16573	16640	13054	20834	16881	10767	16370	16353	26497	11290	20379	10522	12303	7734	10818	8510	10489	6012	17455	22585	12746	19577	7320	11054	12484	9628	14037	7286	11003	8050	19813	12535	12185
98:03:03	98.0508	22159	13822	15185	19400	13121	14581	15965	10278	13839	21307	14404	19619	17471	16855	16611	12096	11729	13286	16045	15906	12062	23577	15429	27003	9468	14653	8873	15505	6046	8274	7586	10936	7185	12687	20919	13535	21767	7050	8957	16463	8472	14134	7274	10805	8653	14716	21223	12003
98:33:04	98.5511	18754	12708	19999	16151	19923	12805	19109	11619	8185	21543	15210	15547	20463	14450	15180	17670	16501	12278	13822	13598	11159	15923	16729	28611	9295	15261	10670	16387	6379	9569	9172	11936	5476	13138	17142	12767	15670	6691	6696	13083	7459	12493	6455	8923	6611	16611	12809	12767
99:03:05	99.0514	17864	13792	24083	16666	19248	12286	15126	10565	12788	23028	13771	15037	14446	9269	17801	16952	20678	14307	13881	12746	10375	12839	16801	26117	8455	15919	7978	14104	6653	10117	12033	11489	4493	12919	15455	8881	22180	5050	9480	15940	10181	11923	7839	9949	6586	13915	13041	13649
99:33:06	99.5517	18358	14809	23193	18121	11033	14590	15071	9949	9712	21277	16577	13484	16531	14109	16564	18632	19412	16210	13231	14358	10704	15442	15720	18670	8012	17404	8400	12746	6177	9649	8953	9147	5156	10856	18708	13450	21801	6341	9147	11927	6641	13881	6375	6620	5493	14404	14649	8396
100:03:07	100.052	16197	15362	19012	13248	13991	14239	15957	9611	12463	18902	14349	14931	18320	13826	15404	14552	14425	15796	13628	14396	10100	14893	18201	23632	6485	17573	9784	12708	5223	9746	7632	9915	5063	10619	19805	12307	18763	4966	8434	10999	6350	18564	4451	3873	4400	11489	19003	9489
100:33:08	100.552	24796	15822	22607	15860	13252	14666	15497	9548	10341	20666	11244	12391	15999	15050	13096	20455	13636	14978	12501	11396	8767	12539	16012	21214	7712	16581	8687	12463	5021	9809	6341	8936	5759	11219	11084	9417	20763	5510	8607	8501	6738	16320	4797	12691	4886	16168	17387	9375
101:03:09	101.052	17488	14847	17269	15839	13581	10569	15375	10138	10231	23020	14965	10906	16214	12244	13450	13931	17670	14185	10548	11092	7615	13320	17223	28185	5945	19619	8438	10932	4299	7780	4890	8991	5147	9130	16396	8375	14645	6594	9020	7050	4763	6788	4460	9949	4122	12792	15185	12345
101:33:10	101.553	23134	16467	11155	14429	14577	14784	12008	8843	9868	23391	13265	10767	13607	11957	13560	12467	16547	13839	13083	12353	7620	14104	19206	25273	5856	18265	7147	11362	6037	10902	6755	9151	5198	9273	15552	7130	21016	5565	9434	5434	7750	4080	4932	7835	5729	10708	12459	8472
102:03:11	102.053	19425	15126	18341	16775	14294	19079	12556	6873	10455	20442	13657	13075	13704	10543	10851	9484	15915	14991	13273	8805	6902	13476	16147	19079	6615	15982	7058	12425	6565	10792	12358	9957	5143	10851	12856	7442	12691	3991	9548	4021	6928	14623	5409	11046	5780	13784	13328	8489
102:33:12	102.553	17197	13780	17358	12354	14180	13303	12227	7961	9193	19404	12598	14037	15632	9075	11193	7177	13045	15168	10632	10143	8160	12704	16223	25379	8569	15623	5957	11282	5873	8759	9518	10603	5046	11683	7915	5438	19839	2523	8210	10130	8096	8215	6135	11155	5185	15974	11383	9105
103:03:13	103.054	14569	13451	13459	12834	12539	9814	11383	9316	10991	16742	12379	8168	12362	8177	11611	18678	13294	14598	9877	8493	7350	12138	11948	21244	7772	16902	7113	14480	5519	10704	7366	8404	6611	12801	18518	9742	19585	3696	6097	16286	8257	6721	3953	7822	5911	14231	15480	8442
103:33:14	103.554	10198	27412	16037	16982	15379	11611	15113	12223	8831	14442	11345	9978	13037	6696	12649	22180	12535	12733	13045	9396	7999	11269	13645	18826	7611	15142	7725	14083	7316	8295	14324	7231	6358	11088	16450	14577	11953	4308	8966	15940	7447	15687	4928	10100	8202	12400	11826	9809
104:03:15	104.054	10965	16168	15459	12535	11581	17712	8687	9193	10252	17737	15573	8793	13539	4865	10611	11974	11856	13071	9712	9236	6923	14016	12100	21501	6299	19708	6329	16159	6101	10982	11932	9307	5308	10695	17358	10986	19855	5670	8316	14834	8042	11181	5544	5751	4346	10341	10020	8615
104:33:16	104.554	13126	14856	15273	11978	13337	9286	9582	16476	11164	7037	12425	10797	15965	6599	10932	14358	11109	11505	8240	7658	8236	14307	11792	21159	8679	20990	7333	11467	7366	7641	6708	9809	5189	9303	12792	11366	18298	6679	7012	9299	7712	16134	5050	11012	3907	10434	11176	10535
105:03:16	105.054	12649	13020	10598	12864	12856	8240	14172	9155	8755	12847	12548	12438	15682	5160	12438	11932	9852	14425	9607	9632	8350	11691	14442	21687	7734	15121	8286	12370	7008	9598	7160	7080	6227	10797	21914	11134	15716	6097	9468	6274	7582	9965	5367	10084	4936	13775	11240	10754
105:33:17	105.555	17138	14940	14805	8755	12615	18050	13252	6831	9181	11159	12543	12539	12864	4881	12366	15467	13332	17252	13214	8670	8767	11813	16556	21552	8809	14231	7742	12830	6666	9974	5818	6632	6025	8054	16163	12033	14370	4325	7565	24708	9974	10624	4780	9653	4236	12501	12767	8430
106:03:18	106.055	16826	13691	15138	16037	19640	13543	11489	8582	8227	17598	10662	14476	19269	4713	13142	11092	11581	9582	10451	8527	9316	10949	14581	14450	6818	17674	5447	11868	6814	12067	7375	8679	7181	11539	20666	10776	16560	4995	9371	13548	7662	11476	4670	7253	9493	10539	13062	8653
106:33:19	106.555	11586	14324	15573	16455	11868	12041	11598	9721	7784	16936	10075	11586	13877	4978	11586	14134	9236	8493	10666	9472	10366	12345	11400	21898	8902	16750	8371	12889	8079	10611	13151	7105	5852	10383	19855	9978	16071	4152	8316	10721	9054	8472	4713	9261	6345	15345	10624	11257
107:03:20	107.056	11784	13252	19096	14349	13442	23003	11307	8172	9050	13396	11645	16733	16720	4046	11569	11324	10328	11341	10657	9122	9084	13383	16522	20235	8497	18155	7814	12425	7147	10155	6624	11273	6818	10497	12725	19682	18598	5067	9261	14775	9847	13442	6940	8164	4337	12320	10598	12514
107:33:21	107.556	15315	12881	13995	12885	12657	12666	12708	8088	7164	13218	10012	10075	17737	3860	11084	14172	11257	12100	12218	10130	7894	11079	15379	27594	11636	17286	8063	12189	8016	8712	5168	6683	8881	9354	15585	12117	21218	7295	8354	13594	12856	8894	5257	8653	4936	12105	10164	13607
108:03:22	108.056	15598	15459	12932	12590	11294	12809	11307	11822	6147	14750	12218	10278	14315	4839	11565	12455	16805	11974	12235	10847	8759	10527	14978	22383	9012	13320	8126	10873	8788	8341	7033	7164	5852	10337	14476	14016	17826	4827	7734	14843	10594	9172	6569	12320	7354	13278	10117	14058
108:33:23	108.556	15750	14868	21472	13320	13214	15476	9636	10700	9168	16518	9299	16239	12577	4303	13105	13548	8295	11927	12809	13539	8527	7084	10965	19455	8890	14379	8793	8885	10273	8949	9982	8902	5038	11898	12847	14197	17210	5535	7531	18974	10202	8109	6139	8632	9750	13413	10193	10725
109:03:24	109.057	12121	14759	20168	13311	13117	11628	11594	11801	10404	15944	11957	9037	16349	3320	11227	10721	14033	12497	15408	11134	9358	8206	14029	23953	8649	11978	7181	13784	10476	8666	9987	7573	5962	13522	17931	9075	17210	4941	7219	17902	10835	13079	7101	10877	10750	12822	12155	13193
109:33:25	109.557	15256	13518	16986	14421	11155	10337	12391	10522	8771	15066	12780	8455	17349	4755	12484	15868	11269	13953	17429	9839	8320	11067	7898	19868	8409	17708	8105	9430	10632	8392	7801	7615	6438	12898	16607	13480	16906	6451	9354	12252	8721	11598	7898	12223	7459	12185	14999	11750
110:03:26	110.057	11434	13244	15214	13434	9936	8143	12446	9577	8417	15822	13294	13902	15775	4637	10944	14843	9189	12615	14337	13421	7653	7890	14193	23982	9923	13467	8324	11421	8008	6548	10008	6704	5801	12370	18016	12290	14425	5590	8860	8928	10965	14763	6434	11695	7970	12138	13413	11451
110:33:27	110.558	14269	11168	17121	11759	11991	13383	15636	8539	8489	17071	17695	9864	19261	3223	13362	18653	10636	12687	15054	11965	8430	9915	11700	23691	7215	12991	9582	10885	8092	8316	7105	7915	6658	11678	20206	13721	13953	4599	10400	11214	8683	14708	5738	8995	13155	14746	12079	13564
111:03:28	111.058	16180	11877	19657	13657	13645	15412	13991	10105	9970	17438	13463	16518	15269	2620	15311	13877	6468	16214	17725	14172	10417	7291	12012	27733	10025	11172	10168	13906	7510	11560	7008	8544	5679	12653	21758	13906	18155	4983	9497	12569	10219	20071	5350	9514	9940	14290	10657	14569
111:33:29	111.558	14155	14999	14902	14400	15172	14902	14463	10873	11898	19358	10936	14809	17349	4738	12910	11062	12995	11894	12058	13121	13674	5890	10197	25704	10227	16041	9274	14104	8050	10273	8611	7366	6767	12320	17889	12763	17446	4156	7750	13324	13024	9746	5632	7662	11020	12543	11552	13421
112:03:30	112.058	17003	15176	17940	13923	18670	15758	17539	10678	12602	17079	12278	19986	17016	5578	16442	12712	13379	14467	13240	11691	13594	6122	17433	24986	9189	15615	9176	13434	6590	9919	14505	7029	7016	11219	23370	16176	17889	2806	8299	11961	9784	16720	6746	11126	7215	15041	12383	11818
112:33:31	112.559	18467	19028	19758	19058	23560	19573	14699	9868	11986	16611	15712	11311	15590	5586	16417	12548	16303	15898	11624	15096	12733	14303	14358	26117	9615	19619	8185	10687	6421	12387	10303	8193	6649	11337	10569	11636	17877	5594	8164	8413	11294	10725	8046	8729	6400	13155	8974	14986
113:03:32	113.059	18421	16201	20083	11489	17408	15691	13155	7814	14142	22138	12556	17509	17961	4848	16986	13223	16636	21147	10822	16189	10982	21742	15974	22062	10079	18180	8480	12771	8286	9219	5303	9362	5852	11877	21345	11316	19100	5886	7704	7890	10847	10881	8168	11155	8873	15953	12379	12067
113:33:33	113.559	20353	13358	17303	13451	16712	14775	14396	9885	13362	15754	13147	15847	14801	6329	11986	9324	21501	17050	13231	18666	9970	18569	17619	22358	8506	25674	9240	15045	9050	9134	6033	8852	6345	11936	18522	12210	16834	4983	7151	8290	10324	8928	10425	8586	9522	13678	12577	13965
114:03:34	114.059	20902	15632	22193	21332	19809	19020	13683	11341	14261	23087	13324	16607	17307	6143	13349	16134	18953	13628	10826	21856	10282	17763	18269	20033	11227	23374	7067	11877	7337	10257	4177	9463	6890	10792	17400	16771	18155	5767	7687	14307	11535	10965	6822	10598	9932	10434	12442	10244
114:33:35	114.56	17311	15235	19058	16189	20855	20016	13421	9067	13003	19125	14400	14944	14923	5421	12691	11577	19092	14995	12611	16678	11020	19480	13130	18012	8101	17657	9421	12801	9480	12033	8206	10109	6480	12408	19210	11408	16708	6438	10109	15375	11062	11231	5945	8940	7620	13472	11750	9573
115:03:36	115.06	15969	12505	20784	11653	17033	12185	13223	9902	13510	19324	14585	13269	17784	5936	17518	11383	16476	14375	13472	18066	9738	16488	16193	20535	7700	19438	8451	11257	8535	11117	8852	9041	8653	10556	17050	12590	19632	6316	7067	14172	8755	12721	7139	8527	7995	15885	9303	13024
115:33:37	115.56	15585	18594	23168	11016	20130	11345	15585	9894	15737	20872	12535	10826	29134	3915	17725	14645	14923	11978	12940	16733	10341	13965	13708	25556	6923	24594	7919	11843	7856	10484	10995	7599	6957	8160	17332	8750	14978	3396	6940	10265	9189	14142	8012	10999	7738	11775	11379	15121
116:03:38	116.061	15581	14763	20488	21071	20644	8480	13096	8265	11965	16552	12889	16514	19121	4017	17197	14429	16088	15611	13695	13750	10560	14320	16294	32750	5945	20531	7269	14311	8856	11105	9788	9299	8658	7248	19438	5776	14058	3510	9518	8704	9320	9919	5666	10480	10130	8928	12358	13455
116:33:39	116.561	14851	15062	22201	13607	18978	14564	13358	8198	12467	18379	12164	13088	17986	4877	16615	15712	15176	14784	14016	13020	10636	16632	15197	27902	5472	16661	9092	11923	9396	9375	9358	8282	6130	9400	15594	3080	19142	6059	8413	6438	9041	7797	6438	11607	9041	11147	9725	14476
117:03:40	117.061	17931	16999	17763	16459	21535	16805	18218	7063	10535	19813	14497	12894	23379	6822	15235	12345	16611	12978	15602	16442	9552	14725	11278	30759	5346	18290	7772	10311	8708	10434	9404	9265	7852	11733	10733	16185	16172	5641	9375	5405	10168	6569	4261	11121	9839	15539	10468	15547
117:33:40	117.561	14666	16408	19556	17868	13007	13729	13763	12265	11105	17560	12370	13278	14079	7464	16640	12413	19860	11299	14598	15104	10548	16450	8830	30662	5438	20155	8067	11602	8400	10349	7510	7818	7118	9885	8400	16066	19471	5514	7544	14269	8670	10257	5936	10408	9071	15682	8835	15893
118:03:41	118.061	19940	16429	17514	16771	15691	14113	10843	11936	11286	19788	15277	12932	18649	6856	18349	15590	14261	14560	15687	14446	11143	14020	8455	24737	5350	17201	9400	11421	8130	9670	6156	6569	5970	13223	17037	13843	12476	3337	8523	12396	8818	10176	5021	7793	6679	13598	5928	14358
118:33:42	118.562	18931	16708	24708	11923	15041	15986	9792	11020	9278	20168	12624	12657	19564	9101	17712	15915	13788	13704	14619	15370	9598	13889	18130	38190	4624	22244	7160	14421	7130	9788	7088	7404	7472	11780	19282	10932	10628	4578	9278	10476	10915	13640	7088	4860	7130	13526	4860	14151
119:03:43	119.062	20400	18336	19758	12661	14071	18497	10324	9683	10100	18109	11024	12003	19518	11522	14915	10822	15383	13915	15349	20041	8286	14699	20370	30560	5506	21708	8645	12632	7734	8425	6172	8683	6835	10058	14037	14286	18104	6835	6919	13691	9349	7535	6552	8560	9932	13299	4578	14071
119:33:44	119.562	16581	15742	12965	17493	12531	13986	11657	7839	11261	18147	12636	11894	15518	14003	18606	12894	13822	15598	15547	15404	11400	14176	16598	27412	4232	14100	7139	14691	5734	6641	7362	10970	7940	9020	18071	13273	16716	6776	7966	14100	9999	4881	6738	8586	9649	10079	10392	13602
120:03:45	120.062	14666	14476	8565	16438	15349	14020	14531	6080	9126	21906	13016	11868	12775	8982	17024	9286	14332	13510	13552	12256	10269	16404	14265	25269	5139	16332	7328	14142	7480	7632	5902	7902	9873	9130	17944	12674	16720	6451	6464	12712	7809	7599	7400	7210	8392	16830	12759	11725

## Sheet: Ave 4
0-72 hours: 12-12 Light-Dark (LD)
72-120 hours: Constant Darkness (DD)
Period analysis: DD, 72-120 hours.
Time (hrs)	TD2/+; BGLUC/+	PsiRNAiKK/+; BGLUC/+	TD2/PsiRNAiKK; BGLUC/+
0	397615	310854	397248
0.500278	320312	384253	293957
1.00083	295363	365487	229461
1.50139	238643	334574	222056
2.00194	222568	290904	209675
2.50222	234202	257973	196676
3.00278	193983	247052	190628
3.50333	167860	218464	163012
4.00389	154366	203025	168626
4.50444	153345	191349	138899
5.005	140079	184765	139117
5.50528	125193	154234	127186
6.00583	120337	160902	124956
6.50639	132554	139217	121061
7.00694	115752	143492	112929
7.5075	114038	136027	120380
8.00806	106386	136470	113111
8.50861	107930	119336	110443
9.00889	109611	124800	105922
9.50944	102557	112701	106080
10.01	105966	131766	103862
10.5106	98517.6	122404	103438
11.0111	97931.8	119916	105302
11.5117	95245	119634	100464
12.0119	100486	126211	104262
12.5125	111340	137151	98977
13.0131	105093	125154	105889
13.5136	103034	122998	105003
14.0142	106779	127297	100535
14.5147	108430	121399	105692
15.0153	102143	114138	99750.3
15.5156	95776	123736	108146
16.0161	105201	129842	111355
16.5167	103868	125552	107279
17.0172	104250	121401	107883
17.5178	101207	126830	113474
18.0183	104377	131511	105984
18.5186	112677	131983	105054
19.0192	102138	130596	109726
19.5197	105120	124912	107112
20.0203	101705	128692	94594
20.5208	95894.1	112429	99481.7
21.0214	102703	113542	94350
21.5219	89870.7	99373.2	84584.6
22.0222	92180.3	98093.2	81475.5
22.5228	85552.4	93088.2	86880.1
23.0233	81961.2	87485.3	77914.3
23.5239	83730.9	92727.2	81354.9
24.0244	79379	83263.3	70817.8
24.525	75863.8	76583.3	70934
25.0256	69703.2	74880.7	70059
25.5258	71256.3	72384.4	64524.6
26.0264	70246.8	81501.1	61260.1
26.5269	67309.9	77806.9	56229.2
27.0275	60481.8	69109.6	54623.9
27.5281	62022.3	68694.3	51898.4
28.0286	59894.8	68229.8	53681.1
28.5292	60692.8	66763.5	50133.6
29.0294	52540.7	56655.7	47224
29.53	51572.4	56205.9	49758.5
30.0306	55093.1	56681.7	48644
30.5311	51484.1	60465.1	47947.4
31.0317	51639.1	53493.8	50028.1
31.5322	56521.8	53870.2	48557.6
32.0325	55802.1	53550.4	51301.4
32.5331	62963.6	57127	55109.9
33.0336	60981.8	58515.1	51656.6
33.5342	61017.2	62701.6	50997
34.0347	64119.7	60306.1	56838.4
34.5353	53391.6	57196.2	49898.7
35.0358	60264.1	61384.6	54934.3
35.5361	62585.9	61705.2	59604.3
36.0367	69665.6	65290.2	61779.3
36.5372	74748.8	83511.8	67109.1
37.0378	78535.3	91188	69154.1
37.5383	76078.7	96355.6	73311.2
38.0389	81356.6	100206	74143
38.5392	85770.5	100071	81756.1
39.0397	86194.1	107271	80025.1
39.5403	95340.7	112920	82278.6
40.0408	87245.9	112745	85276
40.5414	96976.8	120744	84562.2
41.0419	86708	116610	84172.9
41.5425	89288.6	120364	82248.1
42.0428	91770.6	119999	80750.9
42.5433	86285.2	109990	82854.5
43.0439	97082.8	115098	79347.2
43.5444	97970.3	109296	79672.7
44.045	91983.6	112290	81173.9
44.5456	96277.4	109753	76738.6
45.0461	87593.6	108428	72528.2
45.5464	86862.7	99988.2	70175.8
46.0469	82622.8	95965.3	66916.2
46.5475	73137.5	91402.2	60991.3
47.0481	68123.2	81143.6	60188.8
47.5486	68513.3	65541.9	56852
48.0492	66266.7	58944.9	52233.7
48.5494	67182.2	55489	52161.9
49.05	54402.6	58348.8	43783.1
49.5506	54647.1	54734.5	44317.5
50.0511	54713.6	58097.2	44466.2
50.5517	50339.5	57301.6	40997.8
51.0522	50709.6	61348.2	41716.2
51.5528	45591.8	52666.2	40504
52.0531	44182.1	56529.7	35526.2
52.5536	41095.2	47583.9	35811.5
53.0542	38759.8	46170.7	36350.8
53.5547	38325.2	43724.4	34820.5
54.0553	39917.8	42374.7	32736
54.5558	38233.9	41649.1	32084.2
55.0561	38665.5	36669.2	31551.9
55.5567	36547	38762.9	34293.3
56.0572	32356.2	38918.8	34654.2
56.5578	36911.2	38554.6	31589.8
57.0583	38086.5	40059.5	36660.4
57.5589	43649.5	39914.1	38387
58.0592	42897.9	40443.8	37385
58.5597	40639	44984.8	34165.5
59.0603	44930.9	41307.2	36373.3
59.5608	46344.3	46308.4	40274.2
60.0614	44018.8	45652.2	47313.9
60.5619	47557.4	47800.7	48584.4
61.0625	54824.8	60514.4	52262.6
61.5628	52720.2	66129.1	54411.4
62.0633	52384.1	71057.8	58966
62.5639	58336.4	74618.8	60894.8
63.0644	61058.2	80718	65523.1
63.565	64636.5	87989.4	65805.2
64.0656	69105.8	87380.7	69743.2
64.5658	69911.2	98348.3	73445.6
65.0664	74259.1	94248.4	66616.3
65.5669	71095.7	96240.2	66797.6
66.0675	66983.2	90105.2	70410
66.5681	75373	96731.8	65891
67.0686	69111.2	88076.8	67909.6
67.5692	74958.7	97997.3	65789.7
68.0694	69261	87299.2	59501.1
68.57	63570	95530.4	60427.4
69.0706	68779	78587.4	57756
69.5711	64709.9	82270.9	61014.8
70.0717	68645	78938.9	55516.3
70.5722	60228.8	74075.3	56901.4
71.0725	59728.8	72780.4	54935
71.5731	52835.9	70521.2	52711
72.0736	55791.7	66835.6	49424.3
72.5742	55465.1	67297.2	51278.1
73.0747	49943.7	63055.8	50655
73.5753	45430.8	60926.8	49393.4
74.0758	49998.7	60355.6	41843.8
74.5761	46294.2	52642.8	39911.7
75.0767	45447.1	53613	42299.4
75.5772	47630.2	58403.5	40892.8
76.0778	40772.5	47002.8	34106.4
76.5783	42936.3	51853.8	35795.8
77.0789	39062.4	43160.8	34025.4
77.5794	38864.9	47467.2	36032.3
78.0797	34387	41447.8	33157.7
78.5803	36759.8	44078.8	32603.4
79.0808	40404.4	41144.2	31567.1
79.5814	34906.2	39463.9	32636.5
80.0819	35100.8	37310	29237.5
80.5825	34974.5	37317.6	35586.6
81.0828	36447.8	36375.2	33324
81.5833	34610.3	39225.2	35345
82.0839	37620.2	34752	36690.9
82.5844	35998.8	41321.6	34414.8
83.085	39449.6	35984.3	37722.9
83.5856	38567.2	39157.8	38153.3
84.0861	38188.4	41554.8	39066.5
84.5864	42523.8	41448.7	38689.3
85.0869	39815.7	42190.8	40466.4
85.5875	43759.9	41056	40522.6
86.0881	46299.6	45036.6	40958.3
86.5886	47729.3	46212.9	42344.1
87.0892	45006.8	50517.6	43324.6
87.5897	48165.8	52167.1	46114.5
88.09	43825.5	54910.9	45050
88.5906	48459.7	58059.6	47562.8
89.0911	52148.7	56355.2	47181.3
89.5917	50981.8	55658.8	45816.5
90.0922	54884.1	59971.1	46366.8
90.5928	54674.7	56675.8	48432.6
91.0931	52509.3	64753.6	47796.3
91.5936	54862.8	61977	44777.3
92.0942	58588.5	59432.5	45662.7
92.5947	55913.8	59557.6	44646.9
93.0953	57598.1	63502.1	49784.8
93.5958	60926.4	61411.3	46332
94.0964	56095.2	57334.8	45381
94.5967	55524.8	58238.5	46755.9
95.0972	55752.1	60604.1	45461.9
95.5978	52360.7	59303.2	46617
96.0983	51580.3	53582.2	44035
96.5989	50667.8	54522.6	41242.5
97.0994	49471.4	53545.7	44149.7
97.5997	49736.3	46974	42657.8
98.1003	47088.6	52378	37630.3
98.6008	43564.4	51747.9	38286.2
99.1014	43388	47720.6	36474.1
99.6019	44698.5	45352.5	35043.8
100.103	41345.8	40159.6	34968.1
100.603	42762.9	44442	35452.1
101.103	39730.9	41291.8	34381.7
101.604	39726	43491.2	35640.3
102.104	40931.5	41198.2	33602.4
102.605	36745.4	36290.5	32703.3
103.106	37765.5	36386	33886
103.606	36140.3	33411	33174.5
104.106	34664.4	37595.1	36228.2
104.607	36662.5	35048.7	34137.9
105.108	34873.5	33675	34586
105.608	37935.2	35251.9	33933.9
106.109	38938.1	38168.3	32622.3
106.609	37636.6	35395.8	35244
107.109	37769.5	39365.8	35072.1
107.61	39759	36246.3	36006.6
108.111	36503.4	37382.2	35251.9
108.611	38149.2	36980.2	35746
109.112	35421.8	35695.2	37516.9
109.612	41344.8	34684.6	34772.6
110.113	35577.7	37861.9	36132.5
110.613	35827.1	35561.3	34630.7
111.114	40470	45360.5	33940.8
111.614	42643.4	44763.9	36705.7
112.115	40274.4	45263	34847.7
112.615	42266.9	45399.9	37681.8
113.116	41041.3	41547.1	37895.1
113.616	43247.3	43934.4	37522.5
114.117	43391	43857.2	35565.6
114.617	43350.6	45921.2	36430
115.118	43846.8	44773.4	37493.1
115.618	42535.6	45712.8	34047.9
116.119	43764.9	40337.1	37201.5
116.619	43947.9	44567.3	35523.5
117.12	44396.8	47925.9	34931.8
117.62	42676.1	44629	35558.2
118.121	40585.6	42996.9	37079.5
118.621	44627.2	50068.6	34816.3
119.122	42847.7	45685	34434.8
119.623	43645.1	42311	35301.8
120.123	45133.9	39644.2	35383.7

## Sheet: Wells 4
		TD2/+; BGLUC/+ Wells												PsiRNAiKK/+; BGLUC/+ Wells												TD2/PsiRNAiKK; BGLUC/+ Wells
Time (sec - from reader)	Time (hrs)	A01	A02	A03	A04	A05	A06	A07	A08	A09	A10	A11	A12	C01	C02	C03	C04	C05	C06	C07	C08	C09	C10	C11	C12	G01	G02	G03	G04	G05	G06	G07	G08	G09	G10	G11	G12	H01	H02	H03	H04	H05	H06	H07	H08	H09	H10
0	0	282703	634531	607712	332763	280495	252365	431640	560650	463066	375345	215390	334716	515705	338052	18208	418913	415175	467885	246641	24947	356925	308001	371171	248629	200574	473399	273830	311214	746772	562962	416107	490272	498633	405807	281233	402111	313169	544790	605940	383967	346763	255407	285860	271335	148303	521003
1801	0.500278	193959	479137	411384	401795	229002	109625	315277	446507	388247	376699	247578	244534	353832	426345	342204	519638	559108	663934	180131	246884	319131	293529	487428	218871	179471	283222	169211	304786	396012	406042	338573	452277	359802	386768	146407	300043	276109	343204	387994	99820	299173	248942	334953	153241	273275	327725
3603	1.00083	127848	350780	254356	312298	366384	90501	269332	424651	472531	277661	263923	334087	328717	347747	257812	669625	454064	261343	229455	521139	327174	307515	437059	244189	149472	269114	233480	220779	410933	330925	338561	246480	209929	322940	135803	202343	196307	262845	268810	45907	163209	239918	231465	100167	225057	243700
5405	1.50139	71308	255511	250340	251729	294063	89264	233999	374645	309297	173941	265910	293705	283790	357245	349812	310051	338354	192863	283815	487796	346861	319757	458163	286383	131606	224941	171860	166308	457340	227520	211780	147924	364244	259199	76268	185725	153229	358571	195878	234390	208449	215434	334134	115649	257718	187055
7207	2.00194	104318	194815	280092	244015	220674	80083	191705	412868	313893	157324	221010	250017	227903	319062	460623	242974	253198	146466	244733	365680	302739	274713	307098	345664	152664	231246	166031	174924	430681	225554	188280	159428	239606	468692	155542	164702	118042	262557	207825	175039	186731	238172	189671	112574	197994	166886
9008	2.50222	80754	167361	480777	254391	180775	76499	239560	370987	278506	145298	293764	241748	219922	186384	358106	231431	282462	104352	306733	229082	268365	303245	325101	280495	105636	225438	246780	156572	447604	285089	151842	131421	233719	225519	266775	161567	124125	265618	239456	151957	167349	205870	144374	88189	191565	110400
10810	3.00278	73250	173421	168518	239204	177838	64764	182465	369950	329772	136232	205236	207144	209421	197058	287157	228597	267634	90825	434200	213030	268604	187842	264465	315788	126114	223090	241726	168540	404470	201986	166678	105151	246314	191404	341736	136913	148546	221714	242372	163533	176635	196040	122980	78176	159903	129802
12612	3.50333	98918	162180	184222	190352	124611	55457	145055	332189	207109	117904	202564	193763	237886	143435	304242	213853	228215	82974	367984	196759	193220	182579	235548	234878	119951	180359	154815	130392	302851	174508	178011	93357	177722	248539	270722	100965	126946	244897	181538	165880	179399	125952	130797	80454	113082	105127
14414	4.00389	93403	146639	167754	174578	163256	54451	160654	218295	205328	106654	158769	202611	195023	169963	255559	196088	213458	76765	316226	182152	210626	213990	180741	225705	108480	201406	210845	123200	323892	225359	173385	76199	213422	259528	244430	139504	108815	193739	156930	181527	158202	165487	134474	70233	121558	119165
16216	4.50444	66891	154988	174323	208127	140765	50162	168056	254506	182003	96594	172531	171190	141389	144661	204820	212337	198725	84350	254982	168554	219208	156885	261434	248848	90188	158075	134579	127433	304325	183250	152790	82534	145251	207064	210127	123454	76892	147135	112677	128253	156872	138058	102653	66857	139157	68163
18018	5.005	66429	134254	132416	154757	135665	47433	146928	247449	179978	123258	156850	155531	177468	139354	180950	205944	150559	96988	327717	160342	184777	136347	212162	244569	108793	186441	135585	126125	265794	132288	194065	86026	149437	160654	216106	134452	82465	197416	146870	132427	135861	119893	131109	40439	79517	98802
19819	5.50528	72152	119269	109509	159776	123073	45318	134636	233143	141458	94883	134752	134347	164264	89946	164552	169998	177238	95600	258449	152409	155485	114528	161718	146616	109660	142580	109810	116563	213457	192421	117106	70718	152374	123304	176532	134589	87575	168355	122436	137723	145181	120135	96316	52694	123454	85101
21621	6.00583	60752	104098	97635	129016	133190	42705	135642	200783	129051	108816	168784	133572	171617	111186	126472	140036	159116	77517	328303	161188	156699	179758	165442	153485	110550	151934	90582	107393	185250	171038	125397	67366	145759	161058	162909	102086	89726	187702	115568	158283	132820	110920	108399	44289	122240	97762
23423	6.50639	68394	134844	113649	175966	131838	45156	158689	176381	144754	120298	184014	136660	113568	113580	123443	120760	123189	82824	234127	160562	135481	119095	162528	181447	90593	173894	108666	93264	213341	178647	143354	60440	140313	112157	177816	129721	90535	155380	85194	133618	136856	110064	104283	43260	96351	85598
25225	7.00694	56070	128496	98537	141748	130323	40705	95866	178035	124414	123443	149345	122044	103971	121431	120945	120922	127802	96409	284985	124402	147923	134752	164344	174022	110365	161359	113822	115187	208877	108758	92570	67724	148569	109417	140013	125269	74476	164874	87922	115927	130901	119881	76106	44520	100791	67111
27027	7.5075	60694	131398	114135	137389	126437	40451	91206	184662	155960	85529	97253	143344	151751	88524	107486	126820	132405	91357	253395	140557	141413	119546	106585	172484	91402	139157	100248	116401	161347	192802	115742	58359	117175	83563	150061	119488	90697	134751	115383	169280	124101	107729	208877	41861	127189	82754
28829	8.00806	47399	128403	128392	137724	121708	46150	117395	141666	127224	94073	71250	115245	112978	100444	119142	150733	155081	92570	234796	149796	143112	108827	117477	152686	89090	173871	89090	107625	204656	104503	138463	47445	117268	110654	139632	121928	87668	136289	92281	109983	147586	134925	103173	41560	98883	91865
30631	8.50861	72499	121639	117696	125559	122298	40462	121558	170819	140649	70614	78557	112816	127397	106769	114540	117106	111371	83043	170357	96686	133364	117060	120194	134139	84165	160249	84835	98883	174438	162677	97276	62440	119546	116377	154744	121847	94547	165603	120483	83078	162723	99808	69897	30543	79054	86523
32432	9.00889	72140	132693	133179	154306	109186	43387	107798	161671	116054	70268	101728	112920	128322	172969	90559	104896	133711	94305	159487	104873	104260	105763	123097	175363	111648	174195	76141	103219	168563	148188	144003	54717	113891	115846	106642	95785	81829	137156	88304	134497	117973	97357	74672	31341	60128	94189
34234	9.50944	82465	95207	125952	141632	115534	48613	96987	154340	97219	83783	85460	103497	118586	119002	79147	114378	144118	94721	152675	84188	108862	91333	119442	125963	98294	153600	74973	96501	171084	107671	148050	46185	121766	91194	147876	85471	98502	148571	90154	112839	122390	119557	82164	33190	101624	82095
36036	10.01	95715	118887	82303	155937	113175	47595	112458	153022	107174	78349	91172	115800	181181	128519	101832	116586	182511	106157	136520	84280	157764	120332	131352	134162	89217	137630	73343	82812	165406	109509	112007	62232	108908	107174	140487	82014	60879	161359	94686	103601	154455	88524	84488	29491	130566	106179
37838	10.5106	73505	105590	130173	140314	120263	41098	102769	139122	77401	52601	79216	120159	131224	105347	84119	144466	125097	112192	132948	129028	122934	103763	111094	166633	79702	161671	86916	97195	157173	98733	110446	64475	104815	102780	105590	104919	78199	160839	85737	144603	150466	118158	65041	30069	71736	96374
39640	11.0111	73747	122171	98733	122090	120772	51052	96745	164031	68313	69690	64937	122900	131491	163070	95218	124484	134567	88351	142788	112146	136510	92351	96687	121327	102087	127385	78650	115059	144233	107844	144765	57249	100282	147112	92547	120945	84049	151426	117083	129490	129837	85263	74626	34427	82477	89807
41442	11.5117	79864	125605	104445	133908	102271	47422	102537	121096	77401	51792	95600	100999	159498	132959	71377	121962	148339	87795	140846	103000	126808	88558	111071	143389	112018	141331	89680	65781	150408	91322	130056	55711	88304	116956	115198	115799	50751	126553	111117	102676	134531	105555	90848	34300	106052	75250
43243	12.0119	73297	125987	107093	128242	104942	55168	110365	156792	85379	58821	82673	117071	117800	115626	112667	201662	118482	83483	141505	94849	127871	117685	119547	163360	105636	140937	91900	91911	151819	125339	139457	51272	104237	115198	89437	99774	105497	122425	122887	107902	126229	76279	95149	35410	110989	84072
45045	12.5125	102456	150050	115464	123362	114146	47144	150398	158145	95484	61770	113776	103879	158341	152721	106584	151334	117974	131618	165975	153034	161649	104364	127606	114608	106249	113672	101393	78025	155762	144881	108110	47006	116181	127062	96513	128125	74638	129374	128241	73204	135029	75297	72938	29398	84546	51850
46847	13.0131	79043	121327	124391	123732	118609	48405	122599	166679	110608	37121	110169	98433	158341	103300	96953	145009	101821	142626	142916	118506	157602	86015	121975	126785	119650	170818	91668	74823	154189	136925	158838	56891	111036	115117	109290	112354	53098	162134	121697	58024	173085	100826	79748	42728	72718	53908
48649	13.5136	77840	92547	124888	119731	114204	42936	112504	154028	98595	42566	142464	114111	82488	132913	145633	118910	123709	157937	180545	99450	113731	92790	113314	114551	97161	166297	104179	89333	139746	158584	142603	53353	98617	104410	96131	123038	112111	157786	81829	132265	122934	96675	49341	48705	68290	66683
50451	14.0142	90223	120113	144153	149599	102549	35896	116921	145540	98167	50509	117569	110111	146547	112597	114459	158653	123050	132590	120922	126368	161904	94952	115638	119882	99646	154652	107070	71643	167130	111359	153553	70903	98825	105659	102502	116343	99091	119939	119962	94016	120205	73331	57422	49884	44982	73643
52253	14.5147	86084	117812	149518	116482	140880	41919	127629	185841	92640	52035	83864	106457	91472	129987	99265	145159	136023	163521	137053	108596	109741	96166	105960	133849	113822	182891	123234	83402	148176	90258	165834	75713	110758	120066	83702	108723	140128	121974	84639	106572	116817	110850	54555	58243	66140	58717
54055	15.0153	77736	123073	113233	109741	107787	41734	124784	168031	72811	55307	114412	117072	113186	100155	109568	125478	132162	124032	101531	113661	124669	96166	113291	115753	81170	158641	110157	59076	132624	99034	132994	64683	118274	99878	92802	144488	81910	111741	126819	111810	99577	87945	74314	67157	80927	58486
55856	15.5156	84616	92270	106480	106133	119118	49283	102711	123963	72915	49468	91865	150490	110365	104225	109834	171467	84835	148004	138464	115858	120980	118772	127537	134497	92327	119511	109336	73632	145772	95993	139272	87218	89888	158815	82997	148963	106341	139157	133156	114563	134393	89842	98502	62798	76522	80210
57658	16.0161	88755	128415	158260	119269	104133	48474	87726	186698	90686	54162	84199	111637	152651	132161	97114	145853	101589	144106	145979	120771	131965	109047	157302	119569	142071	161174	145274	65492	153728	113949	138567	80280	122818	82685	74880	118725	108966	112354	131537	114516	154097	128854	99912	70707	59596	69631
59460	16.5167	86836	103589	162758	144084	90281	46497	104596	173397	85182	53133	84119	111938	119107	152709	112435	122402	102977	137019	140973	112736	122703	120980	135827	126762	63041	161787	128241	78280	136879	136867	134381	101219	101762	131432	102028	125975	82927	143308	120010	102121	112758	103566	85853	71897	67816	67990
61262	17.0172	83818	132520	172034	123848	115673	62382	110296	129918	86338	43318	86489	104364	124958	96548	118540	148732	104665	111164	141088	93692	138950	126726	142187	109567	69076	123269	138070	67169	125373	124506	118910	78788	105543	108688	107116	138787	108295	141631	149668	87679	137122	103635	102988	74753	85136	77227
63064	17.5178	80500	130485	128508	126739	98005	58232	88165	184487	81078	43433	83089	111764	140996	109811	138845	151079	104885	130808	118783	114135	146823	105520	130774	129502	81621	168783	138232	73967	143389	124055	133283	99461	113105	124564	110203	138509	98282	117198	140741	83205	129397	134624	86176	97103	74476	86049
64866	18.0183	73470	133387	132913	139030	103404	56995	117788	157589	77794	51977	84292	123883	103647	131710	107937	155335	108677	143876	151334	140326	148813	120575	136440	129467	87171	148824	130843	105705	129582	112319	127270	87888	118598	104619	101924	100398	77551	120205	152630	85032	135271	123997	75505	83980	69909	52416
66667	18.5186	77667	143054	159255	189635	103404	61978	97172	175918	74383	64117	83436	122102	176936	95946	142037	129224	118690	141204	136393	119499	137411	105625	141135	139701	59330	161729	137364	82315	130843	128241	133745	82407	72371	148824	111071	132566	48220	116516	126336	64463	103115	133375	110827	91715	69053	66764
68469	19.0192	65354	138660	129039	133584	117580	54694	82465	167326	88894	58845	98491	90720	117730	111602	125409	165060	91507	150074	120598	126184	151462	147275	121674	138579	54752	176508	147621	123200	126194	117488	116378	109024	105196	119812	93183	104422	124714	120112	150640	88581	142071	130820	73135	83899	52913	53307
70271	19.5197	79182	128993	135873	136602	84893	55954	111383	197452	81309	58082	93796	97924	122391	108874	108053	137146	112307	166229	145471	109313	122472	125212	132011	109463	70048	142926	195567	107682	119395	122830	133028	79401	130438	105763	108735	133086	75609	124969	146916	88847	119580	85621	67978	94941	38231	64879
72073	20.0203	92270	114204	141262	137585	114666	49387	127213	148963	69539	66764	87865	70741	153057	117130	153889	192457	82650	109024	133051	104064	127744	94895	158262	118078	56486	131502	123315	81864	120748	88026	107058	80442	113972	97392	74221	109243	54763	145310	115799	86616	134763	109266	64163	79274	56844	50000
73875	20.5208	82962	95611	142406	92813	115858	61874	89819	192745	67261	53503	73366	82511	100988	87749	112551	132751	94756	129028	147715	97173	114979	94490	115060	121905	63192	158248	114470	75990	109139	85379	134971	89345	75794	121673	73481	100109	109105	95727	124772	145898	132901	79089	76869	95866	77586	48994
75677	21.0214	85887	124738	136856	121986	73262	79448	110412	201383	59966	43491	90998	104006	104307	127120	100248	119997	86188	161613	134300	99947	130647	97126	121790	79216	65515	156421	97068	97091	123558	68834	113706	96409	122321	113336	89032	120910	72013	66672	128912	71909	117834	76788	73077	94651	75933	33710
77479	21.5219	79690	98317	128739	85864	85078	75366	87529	176635	55365	45514	85043	75308	88142	70429	82188	126634	78626	105277	101496	75251	105740	111313	125525	121858	78730	142776	97947	52046	102930	67747	65157	79378	106942	99450	84407	107197	94143	108226	118517	81771	98733	78326	62174	62486	32716	39063
79280	22.0222	76580	131086	118424	102630	103127	67423	94166	166019	54312	50890	87992	53515	76973	55411	118332	109371	95184	102931	140221	87992	99994	90166	112065	88478	56995	134844	86604	68926	97056	114933	90304	78696	83425	69354	46613	96236	71412	103150	109278	106654	75805	72707	69874	79979	41294	38323
81082	22.5228	68660	129768	97496	77308	97311	53850	83910	161545	59134	39214	65099	93334	100491	82164	86986	103983	87576	117962	98987	55180	92362	65735	106353	119280	71643	140868	110376	67203	109486	98155	114111	85009	93935	79343	64382	85170	76973	83413	130033	106272	96594	63608	64371	85032	48173	37213
82884	23.0233	64880	100803	89576	92617	92108	48301	98606	145702	48636	47295	62244	92767	97207	88316	76037	94224	118817	90721	78869	66683	90594	57445	107660	83251	65816	112446	86327	72869	97415	91957	107081	69793	89009	62729	61504	121731	51075	69458	99693	81228	94571	60463	46682	75828	46324	50116
84686	23.5239	57237	114216	96189	93172	90882	62891	89796	140036	56798	44127	74395	85032	81517	117118	107914	86836	75540	86871	94929	93357	114147	76707	113384	64406	52948	118609	102260	89599	95102	95831	100479	82396	80534	77783	76152	57411	103080	75713	97230	77782	106306	61284	71666	72129	52925	42589
86488	24.0244	56578	76441	115545	98826	53700	70337	80361	152097	57815	43202	70834	76812	108411	96837	72106	80511	73956	75447	93819	66545	95970	77066	96965	61527	58914	118794	72996	49642	74325	75135	80557	81898	36231	64047	81528	73077	77725	72406	91692	79054	100571	62683	50994	68625	39595	47503
88290	24.525	45248	94027	108712	84546	94074	63492	90316	115094	48104	47665	57110	61978	63596	78996	76522	79575	97554	108666	100699	43560	64221	62521	69042	74048	46104	99045	66984	56278	87876	54613	95253	80291	44901	76383	93634	77875	92085	89969	77343	77875	94790	57353	63989	69042	25352	33514
90092	25.0256	50694	58405	103971	77066	74649	58613	65897	92790	59527	43040	61296	90490	62521	90269	67377	87402	62197	83945	105902	60012	76048	50474	84570	67851	47503	92223	119373	59110	91877	71597	97912	80338	62914	57272	50046	67712	53619	71389	71932	62267	75123	60636	90188	80927	48705	28635
91893	25.5258	52555	56948	68799	88258	93079	57087	91785	111348	43560	50370	65909	75378	62509	62405	64510	87911	77644	62856	89310	53873	100803	77864	81772	47156	43248	91865	61041	55110	81089	59538	116181	72672	55283	65677	65909	70949	47272	75655	65192	69053	78835	59388	55422	55261	42393	32508
93695	26.0264	45364	60035	112215	106249	81031	61330	86489	105104	48497	37884	55087	43676	67666	62163	85078	119466	85541	81922	100711	59758	72325	81286	85575	76522	46578	99461	93392	47653	71181	64475	81887	66914	40046	82361	40485	71389	60521	75204	73828	54601	70614	41364	43121	64371	30820	27456
95497	26.5269	42636	65145	85564	85448	65053	50890	73620	104121	50567	41399	54266	89010	84500	75470	81448	97404	83830	76511	79239	59226	72753	58856	102145	62301	43433	74626	62440	32913	65330	51503	80974	61249	50497	50740	29710	69585	53642	67331	103497	52798	61561	50312	38855	63481	48335	24231
97299	27.0275	42717	68256	71770	73366	79471	42439	76361	85032	39953	49341	52393	44682	62833	59943	54266	96248	72580	82928	67215	64741	57399	60949	93299	56914	32843	82604	76464	43167	76684	29861	95507	49445	50509	36971	62845	69805	42636	68776	64984	62683	36670	36751	38867	51064	62498	30092
99101	27.5281	44959	52971	75077	73424	82003	49249	70395	77170	64279	43792	51330	59619	72580	61735	58209	93750	97716	75112	61839	49769	58521	75863	68822	50416	40312	77089	53723	44543	57688	37433	74950	49954	62255	48347	73007	48011	65215	54694	68938	42370	58578	33676	36196	47075	43445	24265
100903	28.0286	52104	50208	70568	67735	88697	54255	84604	74083	43607	37849	47329	47699	58706	73285	70429	75216	88293	72649	65238	63250	64868	55006	71539	60278	59931	66776	91541	34335	64070	39133	64024	48775	67446	48474	49538	56555	37965	58070	98109	61665	53781	36728	31491	51249	39364	21965
102705	28.5292	47410	63712	66036	96606	69736	64070	76858	61423	51376	39179	44774	47133	73112	49815	63203	85980	80349	54035	86501	42000	61515	71805	75621	57226	52335	85991	60035	33502	68614	31976	75366	53630	46451	44069	55896	54451	53977	64752	58209	54416	28011	34786	57052	30647	27595	31179
104506	29.0294	41410	45722	61608	67077	57399	39988	63943	78950	40982	42196	43225	47988	52359	58024	63758	71805	48127	49561	51387	53202	55006	56174	72800	47665	32589	67435	47006	44925	56786	36323	58960	48636	56601	47642	44566	56243	41491	57133	70048	57087	52139	38936	32393	49145	18277	24566
106308	29.53	36138	48890	63874	56266	74834	46404	49642	62694	49642	30959	48809	50717	45653	36693	66071	81899	62186	49699	68371	35884	50324	49075	78315	50301	58960	84858	55388	38878	58162	47017	69712	60116	35479	44763	61608	52451	42427	68533	67412	33317	47306	32069	32982	53769	29294	20185
108110	30.0306	37595	42254	79158	52740	62128	50243	55943	74823	64406	43399	47318	51110	54035	34612	68186	77563	59538	59908	61180	52474	50474	48324	56810	57076	57052	84732	46381	46902	48243	31791	62151	54220	57758	46902	53064	47191	35849	68764	60556	36797	62856	41248	20023	54937	27525	25225
109912	30.5311	33445	48197	69539	51838	64799	51249	66232	54775	52174	29965	43341	52255	86651	65862	60810	68001	57503	46578	77690	54000	44381	52243	58891	52971	52382	61295	45017	43306	55249	26762	59330	45838	64567	38601	53977	47433	57272	57376	62151	50439	54301	38312	33768	52382	25190	29895
111714	31.0317	44728	40982	64903	62117	46821	49676	68094	49156	53688	27791	38127	73586	51006	46185	48694	71620	47225	52659	80234	45549	59365	48856	44578	45954	42162	63515	41329	41398	61226	27051	82777	59446	45850	50324	43052	76037	42774	72210	61943	38647	59700	46347	30658	53549	27965	32658
113516	31.5322	37283	61550	89414	71192	60914	43468	50567	81829	47491	41641	40878	52035	62151	51295	49757	63908	55943	62105	58382	31630	44959	51202	55179	59931	39005	70707	47098	36716	60740	42624	69042	47006	44566	44994	22473	58787	43664	62301	68186	49665	58463	44636	38404	65712	20416	33063
115317	32.0325	42601	49619	80904	66984	60209	35849	59538	82037	56139	35410	50497	49838	51607	50046	52544	75239	47017	54023	62140	47133	48335	50717	59781	44023	49607	74984	43757	30589	61758	31606	68637	56821	47549	48821	60509	67030	51549	72661	58694	41977	61712	35213	67227	52613	21086	24231
117119	32.5331	55029	44705	69920	80546	72059	56243	48890	70545	107024	37364	48925	64313	53619	51364	47260	72603	51307	63284	68788	56532	44728	46035	87530	42474	55445	68591	50197	38000	71655	25907	85517	80314	53549	54024	43780	65712	40820	63365	69192	54058	74985	44844	63111	50081	26173	33098
118921	33.0336	39294	43029	64070	56821	46266	48023	72071	102260	61966	44196	61307	92479	58625	57029	57330	59399	62903	49515	64706	48578	59191	49561	83124	52220	52971	56243	49780	34393	58289	35537	82985	70764	58949	50601	46821	55746	32716	76476	51306	59804	51850	43607	52879	59342	26820	28566
120723	33.5342	43757	57064	89553	64625	70256	45422	65365	65619	65261	51075	54046	60163	42451	48139	54717	66325	75008	71088	74245	36242	89726	62961	61874	69643	51353	43618	44104	40543	56821	30658	72406	71481	54786	53191	58394	55226	40659	64810	69654	58405	51676	45896	56324	50254	23121	28554
122525	34.0347	41792	78765	73932	69100	67689	68730	55341	56555	61689	42046	72430	81367	61885	57538	61145	57550	55145	51538	75482	52994	61642	62602	65851	60301	60012	58405	55769	47688	72811	34971	79482	62764	95265	65204	41630	68036	57445	60163	76302	56220	58983	42370	42416	42844	33595	38069
124327	34.5353	42485	39907	68996	77667	39595	46197	62325	62290	43803	37213	62660	57561	58162	59792	41167	49491	82824	48000	74638	39283	62140	51041	61666	58151	56682	59457	43410	36728	65909	28150	68394	77678	68152	43283	56081	54150	42208	45029	50173	47537	50994	43110	43942	49723	30219	36763
126129	35.0358	47457	44890	54359	80673	60105	57931	63030	95114	58370	32416	51931	76893	40636	56081	45769	61608	75239	85980	58336	44196	70002	62394	87102	49272	49040	67215	63758	45503	54081	31260	84095	69689	63076	53677	52601	57839	77343	58104	60879	47480	64174	41318	42150	49954	27734	47584
127930	35.5361	50937	64521	60949	68395	58394	46312	74245	88165	69793	35537	53480	80303	61665	45665	50867	71505	58856	62371	77413	45376	75436	64903	73597	52809	45734	65724	48231	46532	75667	29676	90408	61689	95623	65793	60556	61527	73493	65330	86940	49630	85552	52058	41075	49676	25271	35109
129732	36.0367	52255	56683	81690	72071	89518	59110	71424	86836	85252	35237	63816	82095	63249	60347	65990	65897	50370	68661	75690	41086	69250	77690	83448	61804	52486	87379	68672	51989	76904	37757	83829	70741	59087	66718	76175	75794	45792	59076	80615	49538	71088	55758	44728	67597	26855	50567
131534	36.5372	63862	53133	83113	66152	77794	67978	80685	92200	95068	53168	72348	91484	89703	82246	71481	78129	83009	82396	97462	63377	79170	100965	83414	90790	70186	82338	52173	42982	86442	45480	96282	79494	83748	58278	77991	95172	52520	64660	89564	51445	90859	50925	47699	65885	35329	56948
133336	37.0378	75493	43849	97831	61700	92478	91634	80396	83043	96213	58463	68626	92698	75528	99993	102792	98791	92293	79575	96039	67030	89796	92964	111221	88234	61608	95079	55029	47144	92085	37896	97739	76464	78811	61874	61700	83205	69354	94235	103370	60498	82338	58659	44208	79262	25803	55029
135138	37.5383	63527	55538	85749	46300	93068	106099	67296	97577	94501	49723	62475	91091	88744	83286	85437	107578	107417	85437	94305	111128	106469	91900	114806	79760	70163	110215	66024	52174	96340	41514	94316	80615	91761	69435	71134	82812	53665	98664	93831	61712	92721	68256	45526	78985	29329	63654
136940	38.0389	59134	58775	87552	71158	96189	88258	97693	102989	89287	50994	73482	100768	85055	95854	108608	93264	112794	108677	106503	103671	94733	87367	119916	86026	87680	115499	84026	44601	89206	44381	84246	72001	72741	47318	67758	92189	71053	113105	94571	77378	88026	61897	58151	72117	27445	65758
138741	38.5392	65203	65643	81147	79228	105625	83436	79413	111417	87148	40462	111382	119142	116991	73597	83263	96675	103370	95484	112701	109174	103543	100491	111268	94293	91611	108376	75193	56497	105139	44081	110781	73065	79667	72406	78499	89842	99461	120563	116354	71574	93160	73054	61423	80049	28115	69724
140543	39.0397	52451	69840	113996	84281	56162	89380	87472	140464	83656	39872	83656	133099	90073	103936	107914	118194	108435	83448	129502	85229	117130	109278	134162	99947	82777	88107	82766	51364	77782	44890	115788	76476	82338	89772	86523	87460	68614	146222	131837	89183	78800	60937	41780	73262	31410	72464
142345	39.5403	71967	61492	119628	118067	72106	73528	91969	163359	110816	66371	80257	114528	109394	92247	108561	124172	111672	79552	126993	116089	111695	117476	115869	141319	84188	101936	57145	60764	91622	47040	101323	66209	116782	91576	71447	102121	100167	121777	141342	81540	91206	56070	33872	78996	38855	74152
144147	40.0408	75678	49179	95022	75575	86743	74395	92732	159464	81459	49491	102271	104942	106168	76418	108608	96849	121928	110596	158145	98086	103150	109301	146824	116863	68845	108827	56417	62694	117719	43098	108781	68972	88709	92235	93877	116424	67955	149218	126564	56255	93137	69065	77343	99681	24069	86188
145949	40.5414	67412	85587	128253	82893	94282	61018	126415	158376	94386	50509	95623	118968	118991	113140	148306	130612	129178	131573	132693	77031	130994	115106	127166	94132	50486	89055	94617	56382	95553	48324	117106	86038	89287	82072	97045	110111	93276	113279	141284	81633	99808	75193	52058	95472	25086	67203
147751	41.0419	64325	68949	97588	73956	101982	64163	93126	147494	91946	56451	80777	99739	109059	120113	139308	107440	116366	75713	132462	125848	127352	99415	112400	133849	38173	61168	93646	58509	97080	49387	100074	77736	107070	103612	86465	126183	115071	115476	143262	60301	88986	67701	54532	112099	22312	72961
149553	41.5425	69632	48220	95993	89946	107636	75042	109232	145910	88154	43086	96178	102434	119963	107266	118748	113013	126958	92073	132948	114007	138198	111672	137238	132289	57469	69724	77609	60116	77019	44948	73019	94016	102791	97588	96733	98814	67701	129328	147089	89495	103474	67365	53549	90813	35445	75354
151354	42.0428	75829	78095	87044	98895	90952	72857	110886	151010	94143	43214	92004	106318	132381	118078	130520	109417	113557	92652	182141	93796	112158	104815	114574	135896	71689	83679	79447	62128	69111	47988	102340	73528	75378	87182	103786	89495	101022	150466	136197	58902	69053	66672	51619	90177	27630	79031
153156	42.5433	68186	68533	82789	91692	92212	91010	93102	154120	63203	55862	69817	104897	118587	117753	89738	111845	109544	101624	135261	94340	104596	101844	122253	112493	84303	80072	79956	60532	88304	38901	118493	71366	106225	86951	97322	85517	69874	134242	131675	64880	87020	85379	47167	108515	35491	60613
154958	43.0439	65007	57341	86870	111244	95912	86373	110793	163602	110885	53272	75274	148421	146789	106399	127328	131341	117118	82858	126299	91726	112701	104803	120737	113071	88535	68221	72395	54162	88616	39572	87402	59896	113799	79771	99369	120448	50243	118840	136497	43260	98930	83587	41953	94478	34612	71053
156760	43.5444	72557	64799	94224	127432	105995	72741	100271	158989	107313	64024	65516	141783	113522	107752	112736	89842	104122	84119	113233	114956	111429	128577	127941	103323	47780	58555	90836	45988	106052	40994	101439	60371	99577	95287	113013	87055	78453	148257	130635	85529	77193	85263	40185	83610	27560	49168
158562	44.045	69261	59342	93877	100213	104676	81910	124807	164204	87321	43792	69851	104549	111140	110631	112898	133503	124935	81482	128265	82303	115545	131733	130346	84697	67307	80372	69204	60359	70811	40242	105289	72753	101080	78025	76881	128311	64590	108029	129814	108584	72614	65215	105335	105601	20635	54775
160364	44.5456	77031	53052	111429	130670	98641	70129	128878	158318	83113	51075	70741	122252	99439	97577	117569	141679	132369	90490	123443	106098	108516	93796	123802	82257	81390	70441	50694	60116	82615	35236	106457	67990	85899	75401	59007	112781	130773	134231	121257	83182	58798	51353	38011	108041	23109	51468
162166	45.0461	60671	68776	97149	96155	111186	51445	111880	140244	103509	63203	75424	71481	102306	101057	115395	117199	115765	87541	97184	113695	118170	119824	133757	79239	77170	59318	71423	54844	48324	29560	103150	70579	62625	74360	80326	95958	106515	109914	117638	60925	83170	59873	32601	106595	20000	70753
163967	45.5464	60544	61770	90744	97392	84431	55688	111938	170529	84073	65585	66776	92882	101751	100733	96826	91183	129051	84836	97427	63989	102121	99034	138048	94860	56740	56706	65677	59839	77574	32300	91992	56035	69620	67573	89749	98086	61087	108133	113741	86361	85333	71574	45838	78569	20439	50902
165769	46.0469	63908	50312	88732	88905	77181	65585	115892	149888	80419	55399	63180	92073	108723	75516	123061	101150	99612	74557	108492	76488	97450	98837	126877	60821	44520	64614	63596	42497	105832	37699	97947	65458	40982	72221	70868	87495	52162	111521	124217	79921	61307	70603	34959	81448	17237	45052
167571	46.5475	52451	46983	83783	75366	71412	60116	102017	159428	54532	53804	47364	70394	113788	65319	100329	91518	102191	85784	101809	72233	89726	92594	119303	62232	63365	43780	65689	34751	91842	29306	64116	59873	29375	52636	52173	88593	41838	114331	119488	74961	64371	54208	51468	77332	19422	48890
169373	47.0481	51260	51549	74730	47549	66371	67065	80107	135237	68047	53480	45110	76973	74742	81887	91634	71990	73805	57353	108573	106781	83228	75956	101497	46277	78730	50948	67134	40867	64267	25317	96559	54544	65423	66244	54428	89010	22809	85853	106977	57018	61504	51619	40601	76707	19815	47780
171175	47.5486	35930	77413	86558	55977	77494	65909	84257	107359	72267	45503	42254	71239	70163	33849	71528	49480	64521	76442	86986	55584	86951	73296	85842	31861	53861	50058	76430	32982	60336	22531	59087	64267	78129	52960	51272	47757	89506	84419	98109	42185	63585	45803	33549	65330	31768	46821
172977	48.0492	45445	62267	57353	66024	61920	59191	74360	134717	66834	44798	52174	70117	74834	42104	58324	43283	40566	69100	90200	44231	72325	53630	79031	39711	32843	43306	51711	41641	32647	20589	69678	58914	69955	59538	72614	68857	49838	66556	96663	50705	68926	43896	30138	57850	23884	38393
174778	48.5494	34554	61446	85529	65030	64845	47688	74406	145599	63504	45121	44266	74198	67539	50370	56578	46393	54521	68510	67122	36809	61862	45110	77135	33919	49295	49179	56648	34346	28578	20739	60729	46404	71285	52289	60729	73678	85714	58313	109752	46705	66163	45792	20832	56948	19641	33803
176580	49.05	24265	52220	82315	46844	52809	40994	62510	110365	63180	41468	40266	35595	52613	58983	54047	67250	41514	62394	108458	31768	49318	70036	64325	39479	24069	55492	37618	33676	27618	14046	46566	40705	73424	38948	50370	65261	41630	57943	86061	44243	57110	37514	21398	52856	20427	36254
178382	49.5506	21884	60012	67620	51873	51226	49133	72349	83887	51861	45769	34404	65747	54104	46520	66764	66209	67597	60741	51619	37167	50462	53422	63770	38439	31919	28797	40185	40300	35132	18000	79343	48405	69331	39965	56578	53087	25144	55804	77112	39167	76915	30809	21468	50046	19017	38462
180184	50.0511	23144	45896	73204	54208	44508	51688	75632	86061	46335	36809	37988	81090	68822	39618	70302	50243	78373	55792	64625	35757	43318	78141	64487	47688	31826	27965	56162	30046	41537	15838	61249	50428	51410	40728	50335	68071	66117	51873	78372	37942	63562	32335	24855	45653	20138	31814
181986	50.5517	20485	55099	60798	38751	35803	61423	67874	82338	48532	37757	35965	59249	44358	37722	96282	54821	86038	48023	81055	26809	48555	60163	59296	44497	30901	21606	43098	27433	42439	14335	64197	45919	53700	34924	50844	56428	44150	50301	71632	44370	57145	27768	21838	49954	18612	30358
183788	51.0522	14797	46601	78511	37167	24959	47422	68580	64197	86003	54463	34867	50948	48012	45468	95392	62498	109671	74904	57550	38578	45884	43792	60371	54058	22150	21005	42670	29676	27456	16797	59908	42393	55099	28335	49549	53491	48809	46925	62371	71331	79401	34104	20034	40971	29086	36196
185590	51.5528	17803	47168	56162	30150	29398	40797	42982	60267	64036	40786	34069	83483	43838	60255	72730	60648	88986	43491	57654	27537	36520	40601	60567	39167	38127	37445	38474	30959	33433	26786	65111	44740	49110	24289	60255	70233	42763	55006	60925	33445	42219	26393	21375	42740	18959	28300
187391	52.0531	27341	36913	59584	33930	25260	43063	68325	59885	47191	40705	28612	59376	52335	42069	76176	42809	96745	37664	75597	32809	47896	61342	48127	64787	38566	25757	32658	29803	40335	21421	60556	42312	52220	28150	48370	46254	32254	34497	50994	27734	26924	20890	25514	39479	16531	40358
189193	52.5536	28797	36300	43722	27710	26867	36855	46196	68256	48821	35745	30404	63469	57735	35317	61920	70048	68001	32959	56370	26069	29930	48462	48509	35687	26820	19687	40589	38647	31907	15410	56682	39780	52902	28843	55029	51815	46994	30693	55619	45456	25676	25942	23722	36820	14809	24011
190995	53.0542	21583	38647	43387	33791	21757	47202	49838	56035	42867	47861	26855	35294	40127	31653	65990	44266	64186	32774	61319	25294	37294	53168	42936	55041	36462	23872	39988	30427	29491	16959	59307	44520	45040	25271	39029	47746	38624	35329	49006	40994	71759	23329	13607	48832	15942	24184
192797	53.5547	30971	32300	55260	21479	28751	44936	45179	61376	36693	49260	25352	28346	40289	31052	77725	47861	52069	44404	46855	25664	32439	50358	45110	30867	35005	24254	39052	25976	39352	17167	53653	38439	46335	24751	46300	42497	34265	37156	60949	26739	52266	28104	18774	35283	14844	24890
194599	54.0553	33052	27907	51098	36959	26127	27999	39248	57191	62012	40427	27803	49191	42728	28959	71412	46520	58047	37005	52335	24300	30462	45087	41445	30196	22820	25757	49769	31236	28254	17595	42104	37896	32971	20104	46139	46959	42913	35595	42670	28520	62417	19294	15052	32890	15318	23919
196401	54.5558	17768	34023	55734	29375	23179	31653	46254	52335	78199	32901	24936	32450	29884	34127	46300	50046	67412	35364	53387	30057	29849	56162	36265	30936	22184	20682	45491	23248	37537	13768	40208	39468	38150	30624	45584	34508	38150	31514	45271	22589	64163	24924	15803	35294	16370	20323
198202	55.0561	33826	42092	49179	32381	21537	30104	48196	32196	76696	36404	21676	39699	32797	32474	46913	33930	58001	42612	42034	20763	29236	39641	31144	30485	27179	20554	27630	29942	37248	15699	55018	22739	34034	31040	29398	40416	27398	40323	50948	43664	37144	24023	16924	41734	20832	20254
200004	55.5567	33803	37283	57168	29017	20277	39664	54289	29260	42104	44983	23572	27144	35734	32774	64891	44578	66348	32185	42034	17861	29676	35387	41190	22497	33398	34416	26300	28566	40508	12728	48254	34427	39225	25722	36982	30312	32161	41803	50682	47433	53919	21283	39826	29734	15930	30843
201806	56.0572	25075	43942	56301	22208	19005	36659	39075	25895	47977	32323	23202	16612	33260	31664	44624	57804	61862	30797	45757	28184	27930	33468	49156	22520	28393	26890	30242	27341	37711	24578	44555	30543	55908	18763	40520	42682	47272	35514	59723	31653	64834	17815	17676	31653	20635	27491
203608	56.5578	20670	43965	40393	37988	18323	38693	37711	74904	48717	15768	26890	38913	34265	28393	55249	33849	51457	44509	49491	28901	31398	39942	40612	24589	18543	27757	30809	29398	31433	18959	38023	44254	48451	22346	32138	48740	32184	25687	60752	31283	49884	18034	12358	30682	20763	22497
205410	57.0583	28231	39630	45341	29502	20046	33109	40300	58486	53746	38763	25445	44439	36069	26150	50301	54255	54925	43699	47572	19791	27317	44902	51861	23872	26797	31248	31167	28924	40439	18635	43688	48405	67273	22971	36277	42982	22589	45214	57434	33028	71620	22000	23387	40994	22254	29202
207212	57.5589	27606	39433	100167	20300	19005	53029	47954	59758	45549	31826	28589	50578	42624	21190	38346	53006	61342	35133	48855	37179	29156	32774	47006	32358	31051	28566	29676	27791	46589	16138	53885	51757	50671	23872	50058	38439	40323	50462	60486	58093	61307	20358	15664	40751	25630	22947
209013	58.0592	19907	48277	83494	31375	24254	43491	55896	74499	48809	32751	23468	28554	37109	30578	53018	42532	50185	43861	52601	25872	38508	39919	42485	28658	32497	31988	40520	26115	41676	19653	47075	45907	50046	23583	45225	32011	32092	44936	79054	30046	56729	25919	19780	40601	32369	24647
210815	58.5597	18705	37479	62741	27422	19040	30635	44971	68325	96837	21248	27803	32462	40057	24728	45584	44694	74464	57018	72950	24751	29387	34393	55573	36219	20774	35398	40531	17872	48890	22057	41584	31109	41294	22913	45514	37491	27872	34289	37988	38069	41630	29895	37722	49514	26323	22913
212617	59.0603	14370	33317	70846	40057	25341	36948	50486	75297	63677	36843	31202	60787	41595	36335	41711	32057	75551	58382	52729	29144	32346	26589	42335	26913	23780	37179	34231	27664	32289	21572	41109	55492	45075	22670	53526	30242	33445	50416	50971	32959	46878	20242	45410	48289	25549	21225
214419	59.5608	13017	52393	63596	33791	32427	30971	55515	68209	102271	35896	27121	40925	46046	37687	58856	39017	72441	47908	73782	27063	38335	32994	47272	34300	26497	42555	41607	35422	42150	25283	46335	70868	62706	22959	41456	40901	31699	51041	45006	31051	58463	30427	22150	54428	40393	22635
216221	60.0614	16231	57711	62556	22843	30913	41237	45584	101000	63585	18416	33606	34543	49318	33988	49526	32115	57850	70822	54047	29514	47549	40185	53457	29456	37896	51006	27364	46855	55550	32612	67666	51202	56000	19630	47237	63642	63007	49006	73204	36046	53480	29757	51503	60209	37017	31017
218023	60.5619	17271	38612	74002	25179	29375	45665	57735	97912	79066	41006	28277	36589	55087	40219	54729	27907	38161	51561	65469	30497	55064	57596	65284	32034	25745	57330	51075	43052	59353	35294	62706	63908	57758	23364	58359	53977	54451	51133	48844	40323	62937	38520	43745	62128	39896	34959
219825	61.0625	17734	56752	71805	33271	27791	55896	52416	120819	92351	38774	30762	59527	59561	46439	64706	68475	58787	85449	67319	38948	66892	52544	70464	46589	52740	67365	34023	33976	74233	42659	65932	62972	55630	24913	59249	70926	69967	63330	81112	43572	54914	31676	27075	56833	37329	39352
221626	61.5628	37479	71354	60324	39526	27884	51457	64845	88489	75251	36092	31005	48936	71089	34069	76881	69019	97566	51515	110250	35410	75598	61087	73805	37260	41873	46670	46740	39433	82396	58012	65989	37803	73389	24138	71585	77123	53226	70256	61989	42508	78222	44069	32589	65307	41514	42219
223428	62.0633	24057	66151	88755	41965	30011	42797	51306	101867	68337	31271	33965	48127	61908	49306	83749	86258	91727	65990	100202	51087	63677	63804	78095	56891	47433	60047	38612	35017	80661	42335	69342	51653	67354	27768	60324	66302	80731	81922	82176	69169	90269	40404	40566	58948	52150	54070
225230	62.5639	31109	62764	86581	35456	35803	45561	60544	107266	102225	45399	48277	39052	76245	57457	104272	84859	86766	69447	98791	48092	58151	66706	89298	55341	41364	69516	50324	35953	78071	61816	80800	71978	59376	27398	67377	73782	54382	78684	83957	59989	85749	49723	38196	74140	51237	45873
227032	63.0644	38566	74048	85783	37803	28809	53353	56128	119014	90270	49827	50266	48832	74961	53515	121095	112458	116262	60093	98803	70892	65643	58243	76199	60452	35317	89321	46994	45017	88558	61110	83274	64429	104006	34554	80777	73343	75112	69863	86570	53942	62613	65064	39052	79598	48670	54324
228834	63.565	33884	55492	98803	38589	33560	47491	68210	119893	151948	33248	38231	56289	71955	62799	98120	124715	102202	129941	95287	75655	75540	74996	91044	53619	33387	69897	54601	66637	93553	82118	58509	68591	74244	28601	77227	88986	70845	81667	99750	73528	69238	48601	33213	76418	49746	48358
230636	64.0656	27005	91056	86003	56336	37514	57758	73794	150270	116979	34982	45711	51861	78962	65793	94397	98953	122356	87761	115107	79043	86235	65296	101023	53642	29051	71400	48740	48243	90570	62660	97241	90593	81274	37641	55145	75979	64429	93680	98074	62960	94721	49387	103358	82141	49884	47179
232437	64.5658	48717	104919	97404	39653	34670	48971	88894	128080	111303	25699	47931	62694	86894	88663	94375	115280	119812	142383	112042	72048	93368	79586	101404	74325	49318	92258	41306	60625	120205	73863	79528	61434	87945	25375	83193	87159	88755	100467	106480	60139	81112	51399	84165	82500	48740	49838
234239	65.0664	43156	87136	97646	53885	41167	55943	99624	138741	81159	71632	44867	76153	103578	90362	80974	113730	123767	86732	125015	88698	85668	66151	88917	77389	42936	87714	63064	63041	112377	60752	63203	53364	91518	22947	64082	101288	76418	85610	83760	53353	74036	61457	27017	86200	56000	35421
236041	65.5669	44717	58706	114712	37225	46439	57688	90223	131375	89691	52763	60856	68753	89611	79991	145090	79285	113476	131260	111972	73828	88142	90952	88847	62429	48162	109359	67007	70209	106272	56486	72002	41075	68810	38196	60590	86859	63180	56382	97981	67157	71527	53480	42786	90616	50486	50925
237843	66.0675	42890	90478	91738	39687	47295	59145	78361	92004	81297	51942	49491	79471	87923	108180	87241	104168	101959	82592	90582	94860	84095	75112	111348	53202	42000	115742	39294	67770	121384	45861	82107	71100	69088	27549	48416	103161	50382	96975	120748	84916	67539	53041	35260	96397	52405	57885
239645	66.5681	37792	72915	90061	71088	51653	50289	91958	156607	95600	46220	48566	91727	73990	88662	84847	127803	114551	102793	129236	88397	96560	73008	109615	71319	57341	80222	45237	51977	102907	69990	82407	83737	77690	26739	90223	69481	49179	84789	85494	56821	79840	45063	36312	81829	48717	43607
241447	67.0686	35884	55295	105694	45607	45376	61423	93865	135734	87067	48532	52116	62741	87645	74603	113140	101173	92963	108250	101762	77285	66082	71481	101936	60602	26508	100236	54116	63134	79424	58220	87205	102872	68891	28161	58972	80615	92166	72198	96629	57977	72325	41792	72973	85506	41641	52451
243249	67.5692	55804	59134	93565	43283	46497	45121	100433	144420	76788	73447	60914	100098	79841	87032	92108	98652	116782	143169	106526	100711	77459	87576	102687	83425	64186	93912	56902	48902	99762	62255	77678	75620	72406	26635	61272	79598	73192	74129	109463	53515	72210	35445	33734	85483	49954	41121
245050	68.0694	44462	99369	92420	42404	52752	52601	84419	119789	84176	38161	56937	63642	89195	115753	81864	97889	98444	86292	97658	77690	80557	76985	81020	64244	39676	98247	52150	47063	92096	47965	73435	99681	72476	27583	52763	86292	53191	62579	87610	37768	61561	34115	25132	64093	49607	43942
246852	68.57	42821	64776	84477	40497	42069	44751	84303	126380	79020	42358	45977	65411	91403	109799	107255	131075	120807	139284	97635	60197	86963	58313	75563	68071	60220	98594	39468	57735	103682	61342	92825	83471	58047	25179	44243	76303	37445	61781	88107	45792	82164	35468	29722	52104	47907	47803
248654	69.0706	42370	84280	93010	43965	49295	35052	121455	130045	69435	28971	58463	69007	79043	91460	83668	95207	82396	81876	86188	75100	79714	52335	92155	43907	56833	97241	63238	41005	92235	49133	67527	69296	42254	27086	45410	66290	37028	70545	105139	43133	74938	39526	25734	69516	33768	53757
250456	69.5711	42370	74302	83332	37005	37872	35768	128738	116459	73840	30994	49237	66602	71574	84604	104283	84535	109221	79864	104468	71401	74834	52104	90871	59492	54197	88974	60324	49087	105740	61619	79170	56000	76164	22728	43942	76765	63989	79366	104757	36080	83078	35757	34080	61873	32115	36520
252258	70.0717	39133	78754	61041	47260	45144	49168	126195	137585	73019	45029	53226	68186	59376	78337	78546	79667	115291	119014	79944	76302	66117	56208	84234	54231	42173	93044	49399	49699	94987	66741	73921	50636	62706	21202	35734	67874	63215	57284	98097	39225	59457	47838	25560	62428	32196	27942
254060	70.5722	33630	60232	68522	35849	43283	42000	95427	113892	57966	55214	63111	53619	69655	79852	72071	82974	72025	98006	62984	72637	74025	58301	82951	63423	36670	84003	53052	39687	85691	68683	73551	49561	46381	19757	49087	84939	44670	54717	87159	48994	69689	44532	57758	70730	50428	32092
255861	71.0725	36647	97531	78233	31722	38867	38994	70880	127397	47468	44266	51411	53330	52879	88269	59053	66325	86142	64648	90131	88674	75956	68522	83887	48879	58810	86512	42751	47318	95265	57133	66602	63874	48000	24080	53052	59064	23664	41572	96293	75470	64706	30994	44208	55607	40751	32843
257663	71.5731	29098	56740	68996	35237	42219	38370	72233	104919	56798	29271	49595	50555	71204	66475	71077	62151	69828	103116	85391	77945	72013	43722	70129	53203	29306	81112	54347	43422	82245	51642	60937	64995	71793	15641	60567	61134	28601	66244	63353	44786	80268	30774	33202	58787	43179	33306
259465	72.0736	31687	72903	67782	35711	41537	40289	72036	94027	66648	41711	47723	57446	69377	74857	70684	63643	75470	66406	74476	59365	72337	46104	68024	61284	48185	76985	39190	41641	96964	57862	56162	62868	55549	17398	37237	62937	22658	51422	65619	37676	47364	36832	50636	57584	31618	32947
261267	72.5742	33861	77829	66417	43156	37919	35283	70949	80523	73817	37699	41896	66232	74430	67643	61874	60741	67863	90536	78476	62926	73019	45838	69446	54775	47133	70117	40589	42404	116437	50092	50324	59076	68198	19861	54821	44277	88709	65862	81089	29999	30312	32520	28531	43919	32404	31445
263069	73.0747	22982	53203	57804	37109	29734	38300	88119	70869	67250	32601	38844	62509	65053	61515	52127	86535	83725	53191	78372	54890	70927	41699	56405	52231	47850	68545	39768	45017	107082	41838	65458	41583	65145	17086	56440	48289	56971	37502	76730	38589	57850	31999	55665	41364	34427	39213
264871	73.5753	19271	46451	60290	32196	37965	33560	57746	87298	44844	33156	39930	52463	40901	57006	59584	70025	67574	51168	68718	51676	85264	52139	53966	73100	53480	70071	41029	50520	65238	54625	60394	57619	62856	13838	38936	47711	56035	48196	66625	74927	42081	28762	22335	57261	39468	34647
266673	74.0758	22462	67123	60949	38763	33248	33445	66105	94479	51757	36000	44971	50682	50937	47538	53018	68938	63076	67528	81459	43676	60706	47515	68348	71528	45734	60186	30150	36161	64486	39607	48081	37329	44543	14196	41052	54682	50150	36104	64706	45306	56555	30901	15445	42878	32682	29630
268474	74.5761	28196	58671	83772	31271	23976	36289	60313	87518	45040	33930	35722	30832	41294	57041	46578	53145	56578	47202	72695	34751	66209	47329	71886	37005	39283	65249	45052	34705	58810	35803	44636	42254	56081	15711	29410	39318	47306	34277	77401	49653	36474	25815	18763	27780	25999	28277
270276	75.0767	29722	56949	58105	39907	26115	28427	64822	65238	43121	49029	41676	42254	49029	55596	48277	48856	50069	57723	77343	34739	52231	53122	45549	70822	24115	73216	35895	31734	67192	64255	52382	49422	46589	14994	27063	48150	39930	34797	59642	61978	51052	30057	18450	39456	32716	27502
272078	75.5772	19803	53688	79517	39861	42971	24647	55896	64614	63989	35109	42208	49260	95600	52266	50809	75574	55168	71285	75759	49133	40000	36277	48659	50312	37341	60509	47873	20589	67770	40092	42855	53376	48809	14404	30023	90397	36693	20474	56786	39190	48058	30566	16682	43190	28566	25398
273880	76.0778	24242	56266	52081	35329	25144	32104	61851	57977	41907	25560	34763	42046	38751	40023	49711	55087	56590	62810	57977	42358	43410	26439	44289	46589	37364	65539	29641	24138	56902	34531	41526	39872	35364	15630	47341	42474	18728	27849	57700	23468	26473	26346	15803	26994	28762	27895
275682	76.5783	25965	39630	40682	32346	35988	38266	49595	57180	50451	46717	44358	54058	42474	51919	55550	59157	59191	59249	79725	53168	37664	41479	41849	40820	37722	56047	37329	37017	55214	25664	44277	43190	45006	13849	28913	38647	42647	28832	60636	18427	53619	23213	17329	24554	25884	29491
277484	77.0789	16982	56891	41075	36393	27167	25895	49850	59977	49249	38173	36265	30832	40578	50856	43086	44289	44948	36936	67365	36474	40358	32057	42543	38439	28589	53885	32566	37815	57237	28393	44000	45572	39583	12716	41086	32046	39768	35202	38693	14693	46670	19630	17572	37549	22184	23109
279286	77.5794	32242	55804	53422	40635	17942	25872	35676	61978	39341	36705	36069	30693	34173	42416	51653	46601	64325	44589	56266	58243	46960	31895	50231	42254	25167	60775	31514	40682	57815	27549	45087	45006	36208	11618	44971	40312	27676	30161	28184	61064	42682	20774	20323	38659	25826	30658
281087	78.0797	33387	48624	58475	19815	12404	29849	34150	42809	33433	34185	32034	33479	29919	34265	37283	38566	61989	35317	44462	32635	39792	28092	74673	40381	32543	58902	24670	30231	56497	26277	33699	37849	33942	13179	35953	34994	25930	35514	47815	39109	41607	16508	14508	37479	27051	25213
282889	78.5803	20786	50150	46000	35387	23930	26300	20404	63908	51873	40751	33606	28023	63550	47757	40555	43329	44728	38381	62001	39190	33791	36855	41618	37190	38265	34959	36497	39098	49249	33872	44809	32751	36358	12393	22566	45144	37456	21156	49029	32173	37884	17976	12138	27942	24473	31086
284691	79.0808	18416	43375	54705	68290	26092	30485	45040	52058	35907	34254	23075	53156	33075	45283	42751	45387	45965	37560	61515	36994	39711	27456	47225	30809	32092	37260	32994	41399	50647	23433	37687	20150	44532	13468	41075	33456	48740	22462	45352	27398	43121	15745	16520	19583	24173	23190
286493	79.5814	34184	52590	40335	29653	39005	29953	36612	30150	39121	30913	18763	37595	28161	42693	33572	45017	54451	48971	50971	29722	36092	36797	30450	36670	35167	53942	41029	35849	52012	38601	38624	21919	32635	9711	37225	35028	38809	22404	44323	46844	51630	15919	16381	11063	22254	16635
288295	80.0819	33549	35502	43110	24277	24381	32057	40994	32693	30381	37965	46115	40185	25919	34427	29803	47353	55665	30705	53330	40878	42693	28358	30578	28011	19005	48566	33075	24635	43433	26346	37745	13121	36728	12242	31491	41780	35271	24924	41930	29132	35040	15479	13225	36763	22971	20323
290097	80.5825	26959	47098	39341	26485	35687	25005	42832	33341	36763	19190	43271	43722	36578	40936	31352	40948	47329	26080	49144	42439	34312	28867	31040	38786	29606	48613	24184	35526	51422	29814	39433	42427	40971	11167	31156	57480	34716	18069	46370	78210	43375	24150	12485	36057	23005	24670
291898	81.0828	18566	37676	36924	39121	37699	23653	43387	32497	68441	21364	39387	38659	25618	43676	32843	42705	42936	37676	41387	47618	33872	24115	33144	30913	27098	61827	19341	41722	48324	25179	29329	57688	36728	10185	26300	43329	26312	16543	46902	28693	58949	22578	15549	39063	19953	31537
293700	81.5833	14797	31167	41387	27999	38589	23907	46104	57099	34312	29930	35687	34346	27757	30843	31988	36751	49653	60486	55885	31468	35919	30947	36682	42323	31202	50451	48266	39410	47884	22531	37572	67331	38589	13190	37768	44659	33630	22092	45376	24832	42959	26231	20555	42023	16531	24508
295502	82.0839	15884	45283	38219	42532	36358	33849	36404	46844	41399	44266	34173	36231	24069	40670	35133	36531	40913	28115	47711	31757	31861	26427	36138	37699	34023	38901	34358	38092	92594	18057	39838	48000	42335	15306	28219	50035	40809	29491	48821	20034	37294	28936	20971	43792	28254	29040
297304	82.5844	30289	35711	48139	36300	38185	36092	27722	32624	50682	35156	36138	24947	36520	40809	32312	51249	49017	68209	45017	33988	28543	32450	43734	34011	25491	39792	27872	54867	52301	36971	35526	39514	25583	17468	35341	44983	32323	28092	38485	19271	45191	26161	21248	47942	25641	37063
299106	83.085	34231	33179	32485	46566	35190	33965	45988	49977	46624	35896	39907	39387	30763	36254	35468	39896	31734	35387	45884	38601	45491	19722	36115	36497	34312	25757	27086	48231	64579	23919	38289	42300	30531	14162	34786	37283	45942	34832	59376	51561	36520	33248	47133	44959	25780	29317
300908	83.5856	35942	30023	44982	40763	27942	34323	33919	60290	36682	37560	35086	45295	30104	34080	32277	36601	39341	60914	53908	32497	35653	34393	36323	43803	34948	42636	29260	39745	66556	29699	38323	47364	46717	11838	38901	31341	23260	45214	51480	46786	45942	37237	24520	55700	25791	26115
302710	84.0861	24439	38161	52069	54104	25849	30161	35075	50451	43456	28219	28046	48231	29156	39514	41295	44069	52717	39792	51653	59608	36185	35375	37884	31410	36057	41005	24450	46809	63099	63423	32381	44763	54220	17133	37260	40763	42254	43191	48416	48035	37560	29965	21098	38080	24000	25502
304511	84.5864	30000	40751	54405	31826	34196	38300	34404	59087	49607	47803	42716	47191	31791	35028	40069	37491	37872	74314	41052	48208	43376	35005	39884	33294	37422	47283	29514	28855	64440	27398	36682	66070	51538	14208	37422	45769	31630	39653	49098	38485	27630	29063	57850	29051	31572	30531
306313	85.0869	35838	43503	45329	31109	35549	23895	49538	55977	46115	31826	34439	44670	33421	39595	26011	43561	44289	56047	68279	38231	41491	25988	55423	33953	49803	50613	31884	39676	72164	24289	41248	36948	48254	19098	45433	44763	44150	47803	47503	31514	37583	31572	29051	47977	37583	31352
308115	85.5875	39456	52474	53260	43341	37976	41017	34635	54706	53526	38497	29930	46301	41942	32867	32231	38994	48567	79320	55318	24855	37792	25156	40081	35549	43595	49272	38508	47133	62556	21606	44670	30404	61006	23710	32346	40081	27352	50775	50925	44763	57249	31109	24913	43595	31179	34751
309917	86.0881	42601	46312	47942	53549	33225	38300	46821	56902	39075	44474	40797	65597	38173	38011	38173	46740	42000	68187	44335	49607	42520	36381	50532	45780	43433	52913	31040	36913	75251	26219	35410	48601	36497	26612	34947	41780	37872	46104	47006	38659	53607	36219	25815	46971	34578	44636
311719	86.5886	46867	37318	70394	51734	34381	42219	51515	62729	56868	30809	46115	41803	38647	50335	42763	47179	39734	76846	56058	37237	48231	33514	53353	30658	37133	57873	32254	39768	87622	33780	42682	48439	57434	26023	42011	51815	28901	57873	53445	26046	41283	33895	16335	51468	29063	36427
313521	87.0892	46601	70938	44127	33826	37734	39711	31710	72303	44844	32774	40682	44832	54301	43965	42740	43965	45873	49873	69423	44196	53896	43295	73794	40890	47688	63353	37514	47063	63666	34786	44416	63411	48855	22173	43214	44173	27641	51931	49029	28682	46347	47179	21317	50763	31375	38566
315323	87.5897	52301	48659	52127	56197	30369	48382	56856	64128	51017	28554	41630	47769	40601	46913	51260	43884	57631	104005	67620	41445	41641	32023	46566	52416	52613	49064	42751	41560	67735	44034	39699	44023	60937	30184	57688	50266	43815	58925	56659	35017	46312	43237	29063	46428	33861	40647
317124	88.09	44659	44509	55180	32554	37456	46485	32635	61296	51769	35063	32473	51827	55353	51491	53341	49329	58775	91992	82488	44289	43873	31988	50162	45850	50705	62093	36809	43711	67643	45688	42901	52844	36601	28867	54729	49087	49919	58972	59492	17607	49977	36531	27179	50462	33676	35606
318926	88.5906	34069	55237	59018	30566	39503	48913	39965	70094	55919	40682	49503	58047	46428	48578	58058	53399	56925	100699	94328	48150	39375	47237	55099	48439	40774	65446	41641	37121	69932	51214	40451	59492	55399	29583	58347	49838	43098	57526	54266	55029	56174	37468	22289	49087	35109	37098
320728	89.0911	46728	56128	60405	38416	42867	64521	50254	86200	63411	32728	43803	40323	48775	52497	45376	46162	53122	83818	82315	53260	44300	47711	62891	56035	49191	45191	35132	52509	69828	42809	44277	50277	48971	32670	56891	57434	47133	58336	62209	43445	53630	41214	22855	54520	27953	41514
322530	89.5917	53642	51179	58336	39734	41745	51526	50740	71805	58162	34797	42300	57816	45722	45503	51561	57862	71308	80466	79656	48150	44613	35711	53075	54278	34994	52081	33572	49260	73944	41375	49584	51965	68071	38474	49942	47757	39190	66013	63296	34208	43190	32774	29606	40820	29710	38138
324332	90.0922	61296	61180	93461	36289	37491	44936	47907	76939	55989	41953	42520	58648	42994	46659	57897	64452	62926	76858	78522	52613	48405	54266	63377	70684	34959	73215	32046	47607	69805	40404	47433	61457	56440	31433	49341	55630	34589	61110	60648	33052	54139	39398	23514	57064	23745	33040
326134	90.5928	59665	51503	64012	45734	46254	50439	66221	81690	51538	37907	45653	55480	55688	50231	49341	52786	66822	62047	82893	50301	55781	35768	55156	63296	45225	66371	33005	46636	73054	32994	54567	66903	49757	36820	65342	49364	46670	57526	72649	41896	49514	35803	23595	44624	23630	49572
327935	91.0931	35907	55330	73898	34208	36439	50000	58995	94895	52590	41087	52231	44532	63677	59804	49040	59989	62891	105081	84118	57665	60475	57041	62822	54440	30427	93726	29109	46555	66961	41861	44508	56521	52590	38693	76337	56440	47214	63434	62151	31907	42786	35988	20936	41919	33502	37953
329737	91.5936	59180	43410	58787	42381	43549	49931	78962	79991	59469	40138	53538	49017	72060	55839	57272	69065	59955	66163	71921	52867	65863	51295	58290	63134	33722	58590	31768	49538	70799	56255	50821	41942	32682	29560	64880	49584	33098	56058	72106	30023	40173	37352	25156	47179	32774	41040
331539	92.0942	56324	45075	74499	43792	38797	51214	76916	91900	69689	51549	49399	53908	65666	40358	54509	60024	71898	68904	74927	46543	57793	41063	66857	64648	41190	68279	34566	53133	77031	29757	52463	55133	50509	36809	52000	50624	21942	60128	68128	19456	50613	36046	27271	41410	37052	41040
333341	92.5947	56428	43422	57503	57226	34254	51700	65007	71678	49850	79112	51225	53561	50705	51572	45607	54833	67608	54428	89703	65909	58058	59504	60382	56382	44266	53064	29641	52278	68279	38219	51133	64729	46219	29283	69354	49711	19398	40462	61400	33005	52648	28809	25317	51376	35468	38173
335143	93.0953	72603	58185	56659	50289	38774	46589	68984	109880	53561	44335	46370	44948	55052	54925	66232	74464	60105	98421	80118	57307	59550	39468	58521	57862	42497	61434	34404	46139	77054	49064	55815	68140	50127	36659	73713	52890	50104	49156	76545	55052	49295	25283	23988	46959	30450	40497
336945	93.5958	62926	61041	68857	47884	36312	53619	52717	145495	45098	65839	43664	47665	51087	69712	60625	72372	74707	84350	64105	47491	59261	42046	57989	53191	38115	66949	33664	54220	68834	42034	50832	56636	57630	33121	70822	52994	24820	50751	54463	36554	47838	37653	21630	44046	35433	40266
338747	94.0964	52960	56347	51723	62348	40185	44208	74349	103266	53989	44416	47711	41641	48855	58833	54636	65227	54070	59561	62995	66487	59076	57503	52046	48728	32878	65909	32947	55122	64429	40127	52416	55006	51399	33098	67469	65354	16924	57168	57862	48936	41179	20485	25849	46208	29514	38104
340548	94.5967	62787	48682	51838	40266	44636	46115	57630	113269	50439	48636	53619	48381	50358	74661	48462	69655	47272	62463	71042	50520	52324	45040	66140	60925	34682	76060	36959	50809	70915	34462	52567	57931	67042	30913	64359	58960	12451	49179	69227	36242	45295	24404	26589	49827	42716	37040
342350	95.0972	53272	54625	67631	44659	49561	55099	70210	86223	43271	48035	53364	43075	61481	58301	51919	65250	66013	99358	75366	52347	44254	43052	48000	61908	33884	72291	47029	47156	61769	38659	52497	59307	38705	27086	52948	45052	47642	55237	56798	48786	41977	27572	28034	48092	33595	36046
344152	95.5978	45006	45607	66036	53873	42115	49295	59573	83575	46959	38612	46139	51538	45942	68891	51353	66498	57561	75008	78973	56983	40173	46023	46763	77470	35907	68915	42705	45930	75262	39872	33132	49445	65677	32462	56682	56682	52093	54671	61978	52428	33005	23329	23190	53052	34578	34578
345954	96.0983	38994	55145	58509	34173	47387	43745	62995	88258	49087	43526	49931	47214	45329	52243	54174	56590	56440	61931	68441	54035	42000	40763	58012	53029	43873	61411	37456	34820	65099	28716	35676	52624	50751	29999	51827	52231	52393	45792	59237	47561	48983	39445	24647	42705	29225	34300
347756	96.5989	44034	36994	50092	33722	47954	46693	59261	77436	52728	61307	42659	55133	49387	42358	59665	66984	58579	63412	65851	55376	49468	43503	45861	53827	37537	53445	43468	43930	59573	32924	40277	46162	38589	25271	47272	42347	49376	60278	57700	48358	40797	25040	22069	39537	23213	30173
349558	97.0994	40277	56255	45272	38185	39757	40497	61608	70279	50405	50555	50139	50428	40381	64880	58683	59758	41815	66290	65666	46266	43202	47318	53549	54740	34566	59261	49803	42127	55006	37861	48740	53861	40416	27468	56047	58972	43607	51607	55538	45618	61191	29341	19237	40404	30277	30346
351359	97.5997	41422	35965	48301	33872	41676	72071	58417	73747	45711	48555	49353	47746	43653	50486	44289	48277	44717	42150	60278	42913	40104	44023	48104	54694	27803	61006	45121	39271	67111	34682	47387	49526	38982	25098	52370	63273	41711	44543	56370	34023	56740	26323	29167	42058	27329	28577
353161	98.1003	39283	48786	49144	45988	45746	39387	57700	64070	38867	45214	42393	48485	44844	62070	57342	47861	51179	88281	49272	50751	45214	36716	46925	48081	31445	50185	37676	35549	53168	21410	42057	40057	40335	24867	49225	53931	49341	40289	58185	23826	40832	24647	22763	35849	25676	26554
354963	98.6008	49780	22474	48624	38901	43641	41294	68522	51145	40786	39942	37468	40196	43179	45283	50798	57596	53411	58856	69100	49665	42971	38127	65307	46682	30104	48879	28497	32913	51642	33849	42011	54312	45526	28658	44428	41826	54740	40034	62995	44104	28127	28774	16208	27456	28901	28312
356765	99.1014	37872	42601	51156	30231	38612	48023	48000	51399	41179	36924	40763	53896	56683	52416	42335	49584	52231	45676	57665	50150	46428	38069	40439	40971	25421	53260	24485	33687	63041	22508	44705	42832	51410	21352	42878	39283	39075	46994	47988	44046	36589	25236	18081	23757	27063	28739
358567	99.6019	36300	42335	48925	31179	36370	37190	51052	69100	39364	41341	47029	56197	50705	65180	37815	30069	52185	47642	41468	44728	43468	44011	41260	45699	37063	48520	21468	34855	50867	27213	35063	46555	47665	34485	40346	35144	30658	51364	55411	30566	29364	24936	16335	18578	25421	29086
360369	100.103	39965	31676	42844	24624	30670	39352	58209	56185	35630	44844	46115	46035	37722	45086	33953	40173	44000	33526	58313	36231	38115	32820	40913	41063	34393	35595	24855	28716	54648	22924	40046	41884	48185	24901	43433	40034	37491	40393	47156	50763	27884	18751	25040	23815	28508	29884
362171	100.603	39896	39977	38254	26786	30832	45491	58035	48983	37976	55006	44185	47734	48462	43549	37387	44589	53838	40693	66394	45838	32705	26508	46486	46855	22184	47445	23953	25919	53249	31283	37156	46035	48150	30161	42046	41815	41768	45214	47306	27375	21352	16520	18774	37606	23040	51595
363972	101.103	28080	37976	41549	27294	34624	41329	41734	43029	44393	38393	39861	58509	40994	54278	34855	40162	46474	54856	55018	36497	30647	25618	38589	37514	21815	54197	25745	29468	51746	21132	39965	36716	39329	26346	38971	36346	47133	46878	53226	13653	36843	20878	18023	37711	17988	42289
365774	101.604	24947	44497	37109	31780	28612	35283	44173	53145	44913	39294	45144	47815	35248	46844	39583	49931	44462	39110	65862	41433	37861	29745	48359	43456	21884	58417	30150	25514	50139	28508	40323	38023	46347	28820	42774	30300	38601	48023	51272	37098	38393	20104	17410	28716	33791	29479
367576	102.104	30462	37780	46705	24335	27468	68267	46139	48971	38948	40370	36716	45017	45052	41584	38809	41052	42878	48601	65296	35502	29780	30265	42092	33468	28809	32774	32427	24982	55203	25687	38647	22011	51515	28092	36289	44058	38555	37294	47202	43433	36913	23398	19283	25641	23757	23283
369378	102.605	32023	44555	40589	22658	23306	38555	36774	43665	50428	25861	34843	47688	36081	36936	36982	29976	34439	27976	57977	39109	29225	30739	37734	38312	31260	22809	23017	31421	46139	29040	39780	43977	52578	24878	43930	33121	35341	43607	41873	33907	34948	26450	17687	17422	23005	23283
371180	103.106	28612	44335	45283	33421	33040	34566	41329	42624	41098	29919	35341	43618	34543	37849	34219	33294	39479	29341	61053	29387	37526	30462	35329	34150	27583	41988	22763	33317	45826	26878	35641	54867	33341	24346	31352	33479	41988	39491	44902	35606	42416	29849	15641	39861	24393	19965
372982	103.606	26566	38716	38670	26728	30820	23919	44821	43815	37861	32473	34104	55191	28901	34150	35468	24786	31502	24254	52463	38659	30300	27028	41815	31606	21537	59677	20578	35028	44173	24080	37294	41618	40728	22566	26416	31410	37456	39930	44381	44185	30161	27999	14104	33202	25433	27884
374783	104.106	31549	33052	38404	41769	30184	35815	35017	39792	25294	33988	36000	35109	29780	42150	38994	38335	37422	47861	57503	38670	32312	23225	30901	33988	30786	43248	26913	36312	48046	25537	35757	46358	28728	28161	37757	49700	37572	42832	47133	31502	40335	28924	37167	42578	25121	26554
376585	104.607	23063	39849	51017	23179	20982	53746	38982	42890	63307	27491	22115	33329	35202	35595	32554	37029	33780	32231	51387	30242	33052	28554	35213	35745	31999	37930	18682	30601	47642	22497	40023	48081	38057	24138	40266	23803	32855	41664	43861	32820	47665	26716	27734	32647	26855	34497
378387	105.108	20936	34901	59284	33213	16393	35098	52624	44092	41133	22809	21364	36635	29907	35248	27364	30855	27202	60741	53283	25479	32196	26138	25075	30612	22346	44404	29872	29687	45560	25768	29849	44763	31179	25826	42578	36959	35560	42266	32138	42046	52312	29202	20196	43133	28369	26878
380189	105.608	38497	38127	48520	33341	33294	41491	41884	45711	45087	28369	21780	39121	32612	36474	33606	34959	37907	33768	53468	28346	36497	29445	28624	37317	29225	36924	25213	24878	46983	22520	35572	39907	25317	25514	35919	34554	37468	51410	35687	42115	50081	23306	40705	31849	21884	29514
381991	106.109	30265	27676	40647	28057	37653	48786	62359	54914	37005	34647	32786	32462	30208	36612	54093	31618	33919	32531	61758	36370	36011	32196	29745	42959	32358	35121	20508	30104	57723	16924	30034	48127	45433	24323	27907	28497	24693	47480	40531	31225	45942	26716	21202	32369	25329	25144
383793	106.609	29606	25514	47087	23699	39803	47457	52625	43676	39260	25826	32416	44670	33537	33052	36994	38312	35422	31306	60660	33132	30994	30578	23421	37341	29341	33306	24554	21502	54601	21294	34855	40300	49989	27028	41514	27433	21976	39560	49306	71482	51700	25156	22231	28427	29976	29838
385594	107.109	27641	23190	53480	25098	30462	53700	41907	49908	38138	33757	32612	43341	37537	31930	35433	36786	44231	64695	57526	36173	36635	28531	31884	31028	29121	42566	20161	34358	54312	24231	36069	47642	43641	27421	32080	34520	27156	26924	36774	56671	46589	25271	21202	44150	31815	28913
387396	107.61	29595	38682	50833	24300	31236	46220	45179	56521	43364	36208	36774	38196	35190	29803	31040	28705	36289	33491	53110	46555	44000	27086	33283	36404	29294	26612	28034	26658	69042	22265	35213	52197	60244	58694	41607	33202	20682	23283	46613	36358	38150	29768	18520	32670	30612	32427
389198	108.111	31086	31167	34913	25248	38393	41271	35872	50832	46925	22381	38046	41907	36936	31387	34612	27861	42913	38728	46509	48162	34566	28578	36300	42034	34485	21953	28369	36948	45399	36566	32023	64533	42821	34254	29329	33306	30346	29202	33815	34520	37745	29745	55434	32924	27479	24346
391000	108.611	23595	38867	46636	18994	27953	31052	49387	57330	39445	28601	50809	45121	25791	33086	31849	35595	50370	41849	46705	39861	33456	34138	38208	32855	34774	12728	20416	34624	80731	23942	41260	49480	44913	30231	36670	48358	24335	28577	54393	29606	48821	23248	21329	37815	30982	29179
392802	109.112	29502	25387	58833	18127	19202	24716	30393	50486	50069	45352	36497	36497	40069	29063	31884	30497	30288	64579	57237	34439	38462	21791	25618	24416	34416	50428	17410	34647	64047	20034	35526	55041	44427	32578	36739	36878	32878	24173	37075	60880	53064	26913	20312	33236	45838	28832
394604	109.612	32023	35433	58532	26265	16150	40381	43826	75956	55619	38497	33953	39503	28959	35398	20219	25341	41133	47376	49861	28843	41584	25641	35213	36647	38450	48231	23121	31502	56151	26566	33976	44034	43595	31086	35121	34462	36624	24786	41896	45549	38462	23479	20809	34682	27583	24832
396406	110.113	26150	37930	40867	20416	35306	33606	40219	58579	41271	28809	33988	29791	33352	37526	30231	29722	39029	40982	63400	36057	37502	27826	38520	40196	28670	51572	22346	37976	62047	35040	35202	31491	30531	30658	45676	34323	25479	26300	40474	40520	41479	22219	50266	36728	36867	29052
398207	110.613	30948	22485	46994	26797	35745	21872	41560	50705	43861	42855	37884	28219	35040	41260	20185	38774	29352	45399	49457	39352	31641	23248	36809	36219	29271	38393	21711	35190	59584	18682	35248	46312	41086	31190	42740	39225	37630	25861	39930	30127	37398	23757	17849	36554	35410	38728
400009	111.114	28104	31398	53364	22150	39017	23745	50694	53145	60995	30867	46728	45433	37225	37607	53492	46277	42636	81864	60856	43665	28115	24693	44890	43006	24682	48509	21988	36601	52775	25167	35791	44000	44485	32716	43329	30635	28728	20832	44890	49676	25317	27445	22265	33063	26127	27676
401811	111.614	32867	37445	56925	37294	42693	26959	55018	55631	49815	34670	36369	46035	43329	38878	49468	38832	42543	41040	84801	51665	38370	31271	35537	41433	36323	41225	19156	35121	62671	26473	40901	34947	36520	31919	42254	43745	42034	34427	44358	34034	49757	28947	21687	39549	27976	33502
403613	112.115	27144	40670	73771	41873	31838	33687	34647	48902	48994	41063	33132	27572	41190	36531	39248	42011	41399	86697	59053	35294	41873	30924	38913	50023	28578	37884	21953	30057	61180	21953	37502	30728	39861	32531	57295	34323	34323	30647	48543	39526	39526	28219	24381	32739	26358	28543
405415	112.615	28046	31445	66441	23028	40034	38462	41364	76812	48971	33653	37491	41456	49145	29260	36739	39468	47329	49376	64903	50174	48659	29734	45665	54347	31699	42763	25537	35549	63353	35780	42531	43838	41098	44855	47376	38543	23179	29560	44786	41179	47907	35768	24427	26913	34786	27572
407217	113.116	26867	41121	44797	22127	40682	43341	43942	56694	36924	37572	37792	60637	35445	34346	38520	40855	52833	45202	55977	35283	50578	28254	34763	46509	39930	40046	24104	40161	55364	29086	38393	47769	40023	37606	46335	36936	20612	43214	51330	40404	43676	28589	25884	40150	29687	34393
409018	113.616	37352	39167	48069	26763	46254	60428	40948	52879	41040	37040	42751	46277	42682	39560	33317	46220	46254	38786	68626	38589	52856	34508	34705	51110	29329	44023	27653	37237	61030	28531	40531	51353	30011	33398	50092	34300	28508	34069	52555	45618	38277	29803	25630	39618	37456	26473
410820	114.117	33075	44578	50555	25583	42844	36127	47884	68383	51179	32531	42300	45653	48023	40531	37699	40647	45352	63515	54070	38624	48266	27341	38786	43433	22647	42034	20393	35745	57237	26913	46058	51503	37919	32647	49653	38705	29849	39318	44774	29040	35606	32184	19537	30820	30809	29052
412622	114.617	30115	49908	53653	41341	50578	36924	46717	59527	49318	27838	38531	35757	42508	45630	38081	41514	59319	62105	55203	37040	44347	24612	32254	68441	29121	47110	27040	40219	48705	32994	42994	51561	37942	39005	47410	34786	26797	44925	39722	29052	36104	30034	15086	34404	33583	32867
414424	115.118	32832	46832	54289	20867	44613	51006	42300	72649	51757	31468	37306	40242	51399	36693	43884	38543	50890	56301	58810	38531	40138	32416	35086	54590	26705	48798	29387	45422	53307	34046	37028	45075	30057	38578	49144	32323	37294	40046	52035	42624	35491	24913	18358	38612	32624	32982
416226	115.618	37792	46058	52613	28647	30289	39491	55954	65897	45607	29745	37976	40358	38751	37976	43676	43237	76372	45433	68637	31398	42393	24982	38635	57064	18300	43965	27826	30080	60475	35283	33560	41583	22624	35109	38890	36820	27167	40335	43826	22381	33052	29213	17213	44878	36150	30323
418028	116.119	27884	44589	51711	20705	46879	36127	47665	63041	62533	35479	39237	49329	30843	34289	36878	39364	46844	42532	60093	27919	49168	26427	33907	55781	33271	45838	24982	32924	50751	40046	40034	43664	39977	39364	51353	41618	20867	34034	52740	39318	39976	31306	22034	37052	27341	29942
419830	116.619	33953	44081	54694	27364	37294	36474	50358	69470	54278	37271	42786	39352	34300	39398	41329	45445	46474	53503	61319	35526	59943	33202	37479	46890	29098	48613	23086	27641	52335	27514	38381	53538	34335	41052	51723	37618	20092	37086	43792	29456	40011	33710	21479	37225	24601	29132
421631	117.12	35410	41722	46439	27156	43965	44127	61458	64348	52925	27710	42508	44994	50902	50104	39907	43815	48150	66360	73990	38959	42485	29988	43757	46694	26508	43503	25710	31722	52532	31953	35179	46150	38427	39618	45676	40219	13005	34589	48231	40300	34231	27248	21456	37803	28890	25549
423433	117.62	37641	43075	51595	27190	36971	43375	45156	65747	47283	30300	44439	39341	42867	52578	36578	46023	49052	44832	62717	35791	45549	28127	48613	42821	19930	49838	30080	32809	49618	34508	37167	47457	32635	43086	37722	38393	19953	38578	48532	38219	40358	25861	22543	36867	29063	29063
425235	118.121	34936	31167	49954	27387	37306	32589	50543	58359	54047	37491	41815	31433	29838	46220	41248	29814	43063	56671	51965	51468	49746	27549	36820	51561	27687	48647	17976	33167	47480	31213	38254	48312	45029	29468	39687	42277	32762	38231	46878	41491	63724	34705	16520	35815	23375	33052
427037	118.621	35549	34924	55943	44832	40913	40185	46277	65400	47156	44220	40705	39422	38208	45792	41190	58174	48636	74441	74545	46497	49364	28543	45526	49907	23190	51145	18913	26832	49977	29271	33271	45410	42601	30774	44069	35132	35734	47237	47214	36023	34312	23583	17699	25803	25514	42254
428839	119.122	37133	42844	55330	31271	38254	35734	44936	64024	45272	37664	38115	43595	45873	37849	36612	42046	46289	77540	61168	46925	41699	33225	35491	43503	25179	51584	17375	34543	52347	27768	31317	33734	37514	30196	40740	32520	29780	42601	47029	39792	39745	27965	17734	37433	29815	30855
430641	119.623	32774	36982	50809	32936	35953	49630	47988	63723	49676	33109	38716	51445	37791	38208	38740	38092	45295	54220	45896	39167	42728	33618	43815	50162	27780	45595	20427	24867	51688	30485	31618	42774	28069	41237	41954	34057	40716	48948	49884	43688	37965	25421	15537	33260	33387	27283
432442	120.123	32878	34023	47491	29052	45630	56659	49433	66429	48532	34416	45214	51850	35248	38427	32728	39433	38219	44208	57261	42612	36670	28971	37919	44034	27387	47387	19919	30335	47514	29375	33687	54000	50971	33433	40439	30832	29595	48185	44878	35121	39664	32184	16393	32924	28832	25387

## Sheet: Quantification
	Experiment 1		Experiment 2		Experiment 3		Experiment 4		Average
	2017-05-19		2017-07-21		2017-09-26		2017-10-03
Genotype	Period (hrs)	n	Period (hrs)	n	Period (hrs)	n	Period (hrs)	n	Period (hrs)	SEM
TD2/+; BGLUC/+	22.9424	12	23.0389	12	23.5746	12	25.9835	12	23.8848	0.713247
PsiRNAiKK/+; BGLUC/+	23.8625	12	23.3412	12	25.6846	12	24.3742	12	24.3156	0.502684
TD2/PsiRNAiKK; BGLUC/+	22.067	24	21.9482	30	22.9642	24	24.1844	22	22.7909	0.516889
