# Supplementary material for: Drosophila PSI controls circadian period and the phase of circadian behavior under temperature cycle via tim splicing
Source: eLife journal article supplement (doi:10.7554/elife.50063), 2019-11-08
Supplement: supp [file elife-50063-supp-v1.zip › elife_poa_e50063_Figure_2_figure_supplement_2_source_data_3.xlsx]

## Sheet: Figure 2-S2
Figure 2-S2A
	TD2/+;ptimTIMLUC/+	TD2/PsiRNAiKK;ptimTIMLUC/+	PsiRNAiKK/+;ptimTIMLUC/+
Mean	23.9	22.73	24.65
SEM	0.3559	0.1606	0.1945
Number of runs	6	6	6
One-way ANOVA followed by:
Tukey's multiple comparisons test	Mean Diff.	95.00% CI of diff.	Significant?	Summary	Adjusted P Value
TD2/+;ptimTIMLUC/+ vs. TD2/PsiRNAiKK;ptimTIMLUC/+	1.167	0.2415 to 2.092	Yes	*	0.0133
TD2/+;ptimTIMLUC/+ vs. PsiRNAiKK/+;ptimTIMLUC/+	-0.75	-1.675 to 0.1751	No	ns	0.1222
TD2/PsiRNAiKK;ptimTIMLUC/+ vs. PsiRNAiKK/+;ptimTIMLUC/+	-1.917	-2.842 to -0.9915	Yes	***	0.0002
Figure 2-S2C
	TD2/+;BGLUC/+	PsiRNAiKK/+;BGLUC/+	TD2/PsiRNAiKK;BGLUC/+
Mean	23.88	24.33	22.8
SEM	0.725	0.5105	0.5244
Number of runs	4	4	4
One-way ANOVA followed by:
Tukey's multiple comparisons test	Mean Diff.	95.00% CI of diff.	Significant?	Summary	Adjusted P Value
TD2/+;BGLUC/+ vs. PsiRNAiKK/+;BGLUC/+	-0.45	-2.798 to 1.898	No	ns	0.8564
TD2/+;BGLUC/+ vs. TD2/PsiRNAiKK;BGLUC/+	1.075	-1.273 to 3.423	No	ns	0.4412
PsiRNAiKK/+;BGLUC/+ vs. TD2/PsiRNAiKK;BGLUC/+	1.525	-0.8234 to 3.873	No	ns	0.2197
