# Supplementary material for: Drosophila PSI controls circadian period and the phase of circadian behavior under temperature cycle via tim splicing
Source: eLife journal article supplement (doi:10.7554/elife.50063), 2019-11-08
Supplement: supp [file elife-50063-supp-v1.zip › elife_poa_e50063_Figure_2_source_data_1.xlsx]

## Sheet: Figure 2
Each row represents an individual fly
Genotype	Rhythmic (R)/Arrhythmic (A)	Period	Power	Width
w1118 (25°C)	R	23.8	118.2	4
w1118 (25°C)	R	24.1	103	4.5
w1118 (25°C)	R	23.9	92.1	5
w1118 (25°C)	R	23.6	114.5	4.5
w1118 (25°C)	R	24.4	77.7	4
w1118 (25°C)	R	24.1	102.3	4.5
w1118 (25°C)	R	24.6	62.5	3.5
w1118 (25°C)	R	23.6	91.2	3.5
w1118 (25°C)	R	24	67	3
w1118 (25°C)	R	23.9	107.2	3
w1118 (25°C)	R	23.9	87.9	4
w1118 (25°C)	R	23.6	72.8	2.5
w1118 (25°C)	R	24.1	99	3.5
w1118 (25°C)	R	23.6	80.8	3.5
w1118 (25°C)	R	23.8	122.6	4
w1118 (25°C)	R	23.9	68.8	3
w1118 (25°C)	R	24.1	104.8	3.5
w1118 (25°C)	R	24	96.2	3.5
w1118 (25°C)	R	24.1	73.9	3.5
w1118 (25°C)	R	24.1	96.2	3.5
w1118 (25°C)	R	24	75.2	4
w1118 (25°C)	R	24.4	101.1	4
w1118 (25°C)	R	24.4	70.5	4
w1118 (25°C)	R	23.9	101.2	3
w1118 (25°C)	R	23.7	116.8	3.5
w1118 (25°C)	R	23.9	101.9	3
w1118 (25°C)	R	23.9	90	3
w1118 (25°C)	R	23.8	119.8	3
w1118 (25°C)	R	24	111.3	3.5
w1118 (25°C)	R	23.8	126.6	3
w1118 (25°C)	R	23.9	87.7	3
w1118 (25°C)	R	24.2	80.8	4.5
w1118 (25°C)	R	24.3	58.1	3
w1118 (25°C)	R	24.1	73.8	3.5
w1118 (25°C)	R	23.7	47.7	2.5
w1118 (25°C)	R	24.1	58.5	4.5
w1118 (25°C)	R	24.3	95.7	4
w1118 (25°C)	R	24.8	55.7	4
w1118 (25°C)	R	24.2	33.8	2.5
w1118 (25°C)	R	24.1	52.4	3.5
w1118 (25°C)	R	24.1	92	3.5
w1118 (25°C)	R	24.1	89.6	3.5
w1118 (25°C)	R	23.9	90.9	4
w1118 (25°C)	R	24.2	83.4	4.5
w1118 (25°C)	R	24.1	66	3.5
w1118 (25°C)	R	23.8	107.4	4
w1118 (25°C)	R	23.7	69.8	3.5
w1118 (25°C)	R	23.6	86.1	3.5
w1118 (25°C)	R	23.9	84	3
w1118 (25°C)	R	24.1	78.3	3.5
w1118 (25°C)	R	23.8	96.5	3
w1118 (25°C)	R	24.4	66	4
w1118 (25°C)	R	24.2	62.8	4.5
w1118 (25°C)	R	24.1	68.9	4.5
w1118 (25°C)	R	24	107.8	3.5
w1118 (25°C)	A	23	13.7	2
w1118 (25°C)	R	24.2	49.1	2.5
w1118 (25°C)	R	24.7	30.4	3.5
w1118 (25°C)	R	23.9	69.9	3
w1118 (25°C)	R	24.1	100.8	3.5
w1118 (25°C)	R	24.1	88.9	3.5
w1118 (25°C)	R	23.7	92.3	3.5
w1118 (25°C)	R	24.4	70	4
w1118 (25°C)	R	23.9	94.6	4
w1118 (25°C)	R	25	89.5	5.5
w1118 (25°C)	R	24.3	92.8	4
w1118 (25°C)	R	24.4	101	5
w1118 (25°C)	R	24.3	83.8	4
w1118 (25°C)	R	24.1	48.5	2.5
w1118 (25°C)	R	24.2	94.9	4.5
PsiRNAiGD/+ (25°C)	R	23.9	54.9	4
PsiRNAiGD/+ (25°C)	R	24.6	64.3	4.5
PsiRNAiGD/+ (25°C)	R	24	34.7	4
PsiRNAiGD/+ (25°C)	R	24.2	51.1	4.5
PsiRNAiGD/+ (25°C)	R	24.1	91.4	4.5
PsiRNAiGD/+ (25°C)	R	24.2	67.5	3.5
PsiRNAiGD/+ (25°C)	R	23.9	102	4
PsiRNAiGD/+ (25°C)	R	24.4	59.1	4
PsiRNAiGD/+ (25°C)	R	24.6	86.8	4.5
PsiRNAiGD/+ (25°C)	R	23.7	70.8	3.5
PsiRNAiGD/+ (25°C)	R	24	42.4	3
PsiRNAiGD/+ (25°C)	R	23.7	31.5	2.5
PsiRNAiGD/+ (25°C)	R	24.2	66.2	3.5
PsiRNAiGD/+ (25°C)	R	24.1	52.3	3.5
PsiRNAiGD/+ (25°C)	R	24.1	98.5	4.5
PsiRNAiGD/+ (25°C)	R	24.4	48.4	4
PsiRNAiGD/+ (25°C)	R	24.4	31.9	2
PsiRNAiGD/+ (25°C)	R	24.2	45	3.5
PsiRNAiGD/+ (25°C)	R	24	38.8	3
PsiRNAiGD/+ (25°C)	R	24.2	64.1	3.5
PsiRNAiGD/+ (25°C)	R	24.2	20.1	1.5
PsiRNAiGD/+ (25°C)	R	24.2	66	3.5
PsiRNAiGD/+ (25°C)	R	24.6	64.7	4.5
PsiRNAiGD/+ (25°C)	A	24.5	18	3
PsiRNAiGD/+ (25°C)	R	24.4	35.6	3
PsiRNAiGD/+ (25°C)	R	24.4	57.7	3
PsiRNAiGD/+ (25°C)	R	24.4	57.4	4
PsiRNAiGD/+ (25°C)	R	24.7	34.2	3.5
PsiRNAiGD/+ (25°C)	R	24.4	58.2	4
PsiRNAiGD/+ (25°C)	R	24.4	54.4	4
PsiRNAiGD/+ (25°C)	A	24.2	16.4	2.5
PsiRNAiGD/+ (25°C)	A	24.5	19.2	2
PsiRNAiGD/+ (25°C)	R	24	25	2
PsiRNAiGD/+ (25°C)	A	23.9	17.8	2
PsiRNAiGD/+ (25°C)	R	24.5	94.6	4.5
PsiRNAiGD/+ (25°C)	R	24.6	80.6	4.5
PsiRNAiGD/+ (25°C)	R	24.3	105.5	5
PsiRNAiGD/+ (25°C)	R	24	50.3	3
PsiRNAiGD/+ (25°C)	R	24.4	92.1	5
PsiRNAiGD/+ (25°C)	R	24.2	43.2	3.5
PsiRNAiGD/+ (25°C)	R	24.4	59.6	4
PsiRNAiGD/+ (25°C)	R	23.7	27.9	1.5
PsiRNAiGD/+ (25°C)	R	24.1	56.6	3.5
PsiRNAiGD/+ (25°C)	R	24	33.1	3
PsiRNAiGD/+ (25°C)	R	24.5	37.4	3
PsiRNAiGD/+ (25°C)	R	23.9	84.7	4
PsiRNAiGD/+ (25°C)	R	23.7	61.5	4.5
PsiRNAiGD/+ (25°C)	R	24.4	39	3
PsiRNAiGD/+ (25°C)	R	24.2	72.8	3.5
PsiRNAiGD/+ (25°C)	R	24.7	24.3	1.5
PsiRNAiGD/+ (25°C)	R	24.1	96.2	3.5
PsiRNAiGD/+ (25°C)	R	24.2	73.2	3.5
PsiRNAiGD/+ (25°C)	R	23.5	30.4	3
PsiRNAiGD/+ (25°C)	R	24.4	62.6	4
PsiRNAiGD/+ (25°C)	R	23.7	25.7	2.5
PsiRNAiGD/+ (25°C)	R	24.3	61.2	3
PsiRNAiGD/+ (25°C)	R	23.9	63	4
PsiRNAiGD/+ (25°C)	R	24.7	49.5	4.5
PsiRNAiGD/+ (25°C)	R	24.1	59.9	3.5
PsiRNAiGD/+ (25°C)	R	24.3	87.7	4
PsiRNAiGD/+ (25°C)	R	24.5	63.4	5
PsiRNAiGD/+ (25°C)	R	23.9	61.2	4
PsiRNAiGD/+ (25°C)	R	24.3	101.8	5
PsiRNAiKK/+ (25°C)	R	23.7	27.3	2.5
PsiRNAiKK/+ (25°C)	R	24.1	73.6	3.5
PsiRNAiKK/+ (25°C)	R	23.6	40.8	2.5
PsiRNAiKK/+ (25°C)	R	23.4	24.4	2
PsiRNAiKK/+ (25°C)	R	23.7	60.1	3.5
PsiRNAiKK/+ (25°C)	R	23.9	52.3	3
PsiRNAiKK/+ (25°C)	R	24.1	82.2	3.5
PsiRNAiKK/+ (25°C)	R	23.9	55.4	3
PsiRNAiKK/+ (25°C)	R	23.7	53.1	2.5
PsiRNAiKK/+ (25°C)	R	23.9	73.7	4
PsiRNAiKK/+ (25°C)	R	24.3	102.2	5
PsiRNAiKK/+ (25°C)	R	24	64.3	3
PsiRNAiKK/+ (25°C)	R	23.7	29.2	2.5
PsiRNAiKK/+ (25°C)	R	24.7	43.5	4.5
PsiRNAiKK/+ (25°C)	R	24.2	28.1	3.5
PsiRNAiKK/+ (25°C)	A	23.7	3.2	0.5
PsiRNAiKK/+ (25°C)	R	24.4	85.7	4
PsiRNAiKK/+ (25°C)	R	23.7	37.7	2.5
PsiRNAiKK/+ (25°C)	R	24	31.5	3
PsiRNAiKK/+ (25°C)	R	24.1	82.6	3.5
PsiRNAiKK/+ (25°C)	R	24.1	104.6	4.5
PsiRNAiKK/+ (25°C)	R	24	28.9	4
PsiRNAiKK/+ (25°C)	R	24	22.3	3
PsiRNAiKK/+ (25°C)	R	24.2	84.6	4.5
PsiRNAiKK/+ (25°C)	R	24.2	89.4	4.5
PsiRNAiKK/+ (25°C)	R	24.4	28.1	2
PsiRNAiKK/+ (25°C)	R	23.8	53.9	3.5
PsiRNAiKK/+ (25°C)	R	23.9	89.1	4
PsiRNAiKK/+ (25°C)	R	24.2	68.2	3.5
PsiRNAiKK/+ (25°C)	R	23.9	75.5	4
PsiRNAiKK/+ (25°C)	R	24.1	96.5	3.5
PsiRNAiKK/+ (25°C)	R	24.9	29.4	3
PsiRNAiKK/+ (25°C)	R	24.4	79.1	4
PsiRNAiKK/+ (25°C)	R	24.1	112.7	4.5
PsiRNAiKK/+ (25°C)	R	23.9	56.5	2
PsiRNAiKK/+ (25°C)	R	23.9	64.6	3
PsiRNAiKK/+ (25°C)	A	24.7	15	2.5
PsiRNAiKK/+ (25°C)	R	23.9	85.5	4
PsiRNAiKK/+ (25°C)	R	23.9	105.4	4
PsiRNAiKK/+ (25°C)	R	24.1	93.3	3.5
PsiRNAiKK/+ (25°C)	R	23.9	57.4	3
PsiRNAiKK/+ (25°C)	R	23.8	100.6	3
PsiRNAiKK/+ (25°C)	R	24.1	92	3.5
PsiRNAiKK/+ (25°C)	R	24	112.7	4
PsiRNAiKK/+ (25°C)	R	23.9	66.7	3
PsiRNAiKK/+ (25°C)	R	23.9	87.3	3
PsiRNAiKK/+ (25°C)	R	24.4	58.4	4
PsiRNAiKK/+ (25°C)	R	24.3	98	4
PsiRNAiKK/+ (25°C)	R	23.9	76.2	4
PsiRNAiKK/+ (25°C)	R	24.4	76	5
PsiRNAiKK/+ (25°C)	R	24.2	80.7	4.5
PsiRNAiKK/+ (25°C)	R	24.1	63.1	3.5
PsiRNAiKK/+ (25°C)	R	24	103.1	4.5
PsiRNAiKK/+ (25°C)	R	23.4	37.2	2
PsiRNAiKK/+ (25°C)	R	24	30.8	3
TD2/+ (25°C)	A	11	-4.8	0
TD2/+ (25°C)	R	25.1	40.7	4.5
TD2/+ (25°C)	R	25.1	45.4	4.5
TD2/+ (25°C)	R	24.7	31.1	2.5
TD2/+ (25°C)	R	24.7	20.3	2.5
TD2/+ (25°C)	R	24.9	33.5	3
TD2/+ (25°C)	A	23.5	-5.7	0
TD2/+ (25°C)	R	24.9	30.5	3
TD2/+ (25°C)	R	24.9	54.9	5
TD2/+ (25°C)	R	24.9	42.2	5
TD2/+ (25°C)	R	24.9	82.2	4
TD2/+ (25°C)	R	24.4	32.9	3
TD2/+ (25°C)	R	24.8	82.7	5
TD2/+ (25°C)	A	23.7	2.3	0.5
TD2/+ (25°C)	A	24.5	17.9	3
TD2/+ (25°C)	R	24.9	31.5	4
TD2/+ (25°C)	R	24.9	72	5
TD2/+ (25°C)	R	24.7	55.5	4.5
TD2/+ (25°C)	R	24.9	51.7	5
TD2/+ (25°C)	R	24	51.3	4
TD2/+ (25°C)	A	24.5	5.5	1
TD2/+ (25°C)	A	26.5	17	1
TD2/+ (25°C)	R	24.2	33.2	2.5
TD2/+ (25°C)	R	24.9	75.4	5
TD2/+ (25°C)	R	25	32.2	4
TD2/+ (25°C)	R	24.9	33.1	3
TD2/+ (25°C)	R	24.6	54.2	4.5
TD2/+ (25°C)	A	26.2	4.4	0.5
TD2/+ (25°C)	R	24.6	69.3	4.5
TD2/+ (25°C)	R	24.9	26.1	3
TD2/+ (25°C)	R	24.7	42	3.5
TD2/+ (25°C)	R	24.7	41.2	3.5
TD2/+ (25°C)	R	24.8	81.7	5
TD2/+ (25°C)	R	24.9	43.4	4
TD2/+ (25°C)	R	24.6	66.5	3.5
TD2/+ (25°C)	R	24.9	38.1	4
TD2/+ (25°C)	R	25.2	51.5	4.5
TD2/+ (25°C)	R	24.9	25.7	3
TD2/+ (25°C)	R	24.9	80.2	5
TD2/+ (25°C)	A	23.7	15.8	2.5
TD2/+ (25°C)	R	24.9	34.2	3
TD2/+ (25°C)	R	24.9	51.3	4
TD2/+ (25°C)	R	24.7	30.9	2.5
TD2/+ (25°C)	R	24.5	52.9	3
TD2/+ (25°C)	R	25.1	66.7	4.5
TD2/+ (25°C)	R	24.6	59.5	4.5
TD2/+ (25°C)	R	24.9	52.6	4
TD2/+ (25°C)	R	25.2	40.5	4.5
TD2/+ (25°C)	R	24.6	59.1	3.5
TD2/+ (25°C)	R	24.5	56.6	4
TD2/+ (25°C)	R	24.2	68.1	3.5
TD2/+ (25°C)	R	25.4	49.9	4
TD2/+ (25°C)	R	24.6	51.8	3.5
TD2/+ (25°C)	R	25	27.5	3
TD2/+ (25°C)	R	25.2	41.2	4.5
TD2/+ (25°C)	A	26	-8.4	0
TD2/+ (25°C)	R	24.7	59.3	4.5
TD2/+ (25°C)	R	24.5	21.3	2
TD2/+ (25°C)	R	25.2	43.9	3.5
TD2/+ (25°C)	A	24.2	9.2	1.5
TD2/+ (25°C)	R	24.7	22.7	3.5
TD2/+ (25°C)	R	24.5	57.3	4
TD2/+ (25°C)	A	25.5	20.3	1
TD2/+ (25°C)	R	24.5	63.4	4
TD2/+ (25°C)	A	24.7	10.7	2.5
TD2/+ (25°C)	R	24.7	79.6	5.5
TD2/+ (25°C)	R	24.6	32.2	3.5
TD2/+ (25°C)	A	24	-0.3	0
TD2/+ (25°C)	R	25.4	28.6	4
TD2/+ (25°C)	R	24.9	60.2	4
TD2/+ (25°C)	R	25	33.7	4
TD2/PsiRNAiGD (25°C)	A	22.8	13.6	2.5
TD2/PsiRNAiGD (25°C)	A	24.7	4.5	0.5
TD2/PsiRNAiGD (25°C)	R	23.4	55.6	3
TD2/PsiRNAiGD (25°C)	R	23.2	22.5	1.5
TD2/PsiRNAiGD (25°C)	R	24.2	79.9	4.5
TD2/PsiRNAiGD (25°C)	A	23.5	15.8	3
TD2/PsiRNAiGD (25°C)	R	22.9	36.2	2
TD2/PsiRNAiGD (25°C)	R	24.4	69.9	5
TD2/PsiRNAiGD (25°C)	A	23.5	17.5	2
TD2/PsiRNAiGD (25°C)	A	24	18.6	3
TD2/PsiRNAiGD (25°C)	R	23.5	30.1	3
TD2/PsiRNAiGD (25°C)	A	23.5	10.6	2
TD2/PsiRNAiGD (25°C)	R	23.2	36.6	2.5
TD2/PsiRNAiGD (25°C)	R	24	29.8	4
TD2/PsiRNAiGD (25°C)	A	24.7	15.9	3.5
TD2/PsiRNAiGD (25°C)	R	22.9	21.8	2
TD2/PsiRNAiGD (25°C)	R	24.2	56.7	4.5
TD2/PsiRNAiGD (25°C)	R	23.4	30.2	2
TD2/PsiRNAiGD (25°C)	R	23.5	83.2	5
TD2/PsiRNAiGD (25°C)	R	24.4	40.3	4
TD2/PsiRNAiGD (25°C)	R	24.3	86.9	5
TD2/PsiRNAiGD (25°C)	R	23.6	68	3.5
TD2/PsiRNAiGD (25°C)	R	24.4	62.2	4
TD2/PsiRNAiGD (25°C)	R	24.3	87.1	6
TD2/PsiRNAiGD (25°C)	R	23.5	32.5	4
TD2/PsiRNAiGD (25°C)	R	23.5	33.5	3
TD2/PsiRNAiGD (25°C)	R	23.9	35.4	2
TD2/PsiRNAiGD (25°C)	R	23.9	46.9	4
TD2/PsiRNAiGD (25°C)	R	24.1	65.3	4.5
TD2/PsiRNAiGD (25°C)	R	23.9	58.7	4
TD2/PsiRNAiGD (25°C)	R	23.2	22.1	1.5
TD2/PsiRNAiGD (25°C)	R	24.4	62.5	5
TD2/PsiRNAiGD (25°C)	R	23.4	49.6	3
TD2/PsiRNAiGD (25°C)	R	23.5	29.8	3
TD2/PsiRNAiGD (25°C)	A	23.2	14.3	2.5
TD2/PsiRNAiGD (25°C)	R	23.6	52.4	3.5
TD2/PsiRNAiGD (25°C)	R	23.4	34.6	2
TD2/PsiRNAiGD (25°C)	R	23.2	70.7	3.5
TD2/PsiRNAiGD (25°C)	R	23.6	60.4	3.5
TD2/PsiRNAiGD (25°C)	A	23	15.3	2
TD2/PsiRNAiGD (25°C)	R	23.7	47.7	3.5
TD2/PsiRNAiGD (25°C)	R	23.7	45.9	2.5
TD2/PsiRNAiGD (25°C)	R	23.5	33.9	3
TD2/PsiRNAiGD (25°C)	R	23.6	63.8	4.5
TD2/PsiRNAiGD (25°C)	R	24	39.3	4
TD2/PsiRNAiGD (25°C)	A	23.2	14.2	0.5
TD2/PsiRNAiGD (25°C)	R	23.9	58.8	5
TD2/PsiRNAiGD (25°C)	R	23.9	45.1	4
TD2/PsiRNAiKK (25°C)	R	23.2	63.4	3.5
TD2/PsiRNAiKK (25°C)	R	24.1	60.7	4.5
TD2/PsiRNAiKK (25°C)	A	23.7	14	0.5
TD2/PsiRNAiKK (25°C)	A	25.5	-3.2	0
TD2/PsiRNAiKK (25°C)	A	22.7	17.3	0.5
TD2/PsiRNAiKK (25°C)	A	23.2	13	1.5
TD2/PsiRNAiKK (25°C)	A	22.7	6.1	0.5
TD2/PsiRNAiKK (25°C)	A	23.2	6.6	0.5
TD2/PsiRNAiKK (25°C)	R	24.1	38.2	3.5
TD2/PsiRNAiKK (25°C)	R	23.7	47.6	3.5
TD2/PsiRNAiKK (25°C)	R	24.1	83.3	4.5
TD2/PsiRNAiKK (25°C)	R	24.1	86.1	4.5
TD2/PsiRNAiKK (25°C)	R	23.9	64.4	4
TD2/PsiRNAiKK (25°C)	R	23.5	64.2	4
TD2/PsiRNAiKK (25°C)	R	23.6	83.5	4.5
TD2/PsiRNAiKK (25°C)	R	23.2	50.7	4.5
TD2/PsiRNAiKK (25°C)	A	19.5	-3.4	0
TD2/PsiRNAiKK (25°C)	R	23.2	40.1	1.5
TD2/PsiRNAiKK (25°C)	R	22.8	28.1	1.5
TD2/PsiRNAiKK (25°C)	R	23.4	81	4
TD2/PsiRNAiKK (25°C)	R	23.6	76.7	4.5
TD2/PsiRNAiKK (25°C)	R	23.7	36.6	3.5
TD2/PsiRNAiKK (25°C)	R	23.8	39.2	3.5
TD2/PsiRNAiKK (25°C)	R	23.3	60	4.5
TD2/PsiRNAiKK (25°C)	R	23.9	38.7	3
TD2/PsiRNAiKK (25°C)	R	23.7	29	2.5
TD2/PsiRNAiKK (25°C)	R	23.7	71.3	3.5
TD2/PsiRNAiKK (25°C)	A	23.9	31.7	1
TD2/PsiRNAiKK (25°C)	R	24	95.4	3.5
TD2/PsiRNAiKK (25°C)	R	23.7	77.6	3.5
TD2/PsiRNAiKK (25°C)	R	23.7	72.5	3.5
TD2/PsiRNAiKK (25°C)	R	23.4	75.6	3
TD2/PsiRNAiKK (25°C)	R	23.7	80	3.5
TD2/PsiRNAiKK (25°C)	R	23.6	66.2	3.5
TD2/PsiRNAiKK (25°C)	R	23.8	62	3
TD2/+ (30°C)	A	23.9	16.7	2
TD2/+ (30°C)	A	23.7	21	0.5
TD2/+ (30°C)	R	22.8	26.2	3.5
TD2/+ (30°C)	R	23.7	38.8	2.5
TD2/+ (30°C)	R	23.1	24.1	5
TD2/+ (30°C)	R	23.4	53.3	3
TD2/+ (30°C)	A	25	-5.5	0
TD2/+ (30°C)	R	23.7	25.8	2.5
TD2/+ (30°C)	R	23.9	65	3
TD2/+ (30°C)	R	23.3	37.2	4.5
TD2/+ (30°C)	R	23.7	41.9	3.5
TD2/+ (30°C)	R	23.9	63.6	3
TD2/+ (30°C)	R	24.2	43	2.5
TD2/+ (30°C)	R	23.2	56.5	4.5
TD2/+ (30°C)	R	23.9	66.1	3
TD2/+ (30°C)	A	23.5	12.4	2
TD2/+ (30°C)	R	24.2	26.3	1.5
TD2/+ (30°C)	A	23.8	19.5	2.5
TD2/+ (30°C)	R	23.7	61.2	4.5
TD2/+ (30°C)	R	23.7	37.4	2.5
TD2/+ (30°C)	R	23.5	59.3	5
TD2/+ (30°C)	R	23.3	38.5	3.5
TD2/+ (30°C)	R	23.8	29.9	2.5
TD2/+ (30°C)	R	23.5	41.6	4
TD2/+ (30°C)	R	23	29.5	4
TD2/+ (30°C)	R	24	44.9	3
TD2/+ (30°C)	R	23.8	74.9	3.5
TD2/+ (30°C)	R	23.2	75.7	4.5
TD2/+ (30°C)	R	23.5	51.5	4
TD2/+ (30°C)	R	23.2	72.6	4.5
TD2/+ (30°C)	R	23.5	42.5	4
TD2/+ (30°C)	R	23.7	43.2	3.5
TD2/+ (30°C)	R	23.5	56.4	3
TD2/+ (30°C)	R	24.2	30.3	2.5
TD2/+ (30°C)	R	24	62.9	3
TD2/+ (30°C)	R	24.2	45	2.5
TD2/+ (30°C)	R	23.7	93.2	4.5
TD2/+ (30°C)	R	24.4	41.3	3
TD2/+ (30°C)	R	23.8	38.6	2.5
PsiRNAiGD/+ (30°C)	A	23.4	32.5	1
PsiRNAiGD/+ (30°C)	R	23.7	46.2	2.5
PsiRNAiGD/+ (30°C)	A	23.7	4.7	0.5
PsiRNAiGD/+ (30°C)	R	23.7	31.6	2.5
PsiRNAiGD/+ (30°C)	R	23.7	34.4	1.5
PsiRNAiGD/+ (30°C)	A	12.2	11.3	0.5
PsiRNAiGD/+ (30°C)	R	23.7	77.3	2.5
PsiRNAiGD/+ (30°C)	R	23.6	49.8	2.5
PsiRNAiGD/+ (30°C)	R	23.9	26.2	2
PsiRNAiGD/+ (30°C)	R	23.4	20.5	2
PsiRNAiGD/+ (30°C)	A	11.5	-0.1	0
PsiRNAiGD/+ (30°C)	R	23.5	26.5	2
PsiRNAiGD/+ (30°C)	A	23.2	3.8	0.5
PsiRNAiGD/+ (30°C)	R	23.5	38.4	2
PsiRNAiGD/+ (30°C)	A	23.4	16.2	2
PsiRNAiGD/+ (30°C)	R	23.2	69.1	2.5
PsiRNAiGD/+ (30°C)	R	23.4	37.1	2
PsiRNAiGD/+ (30°C)	R	23.6	54.5	2.5
PsiRNAiGD/+ (30°C)	R	23.7	38.7	1.5
PsiRNAiGD/+ (30°C)	R	23.7	36.1	1.5
PsiRNAiGD/+ (30°C)	R	23.7	41.2	2.5
PsiRNAiGD/+ (30°C)	R	23.7	34.7	1.5
PsiRNAiGD/+ (30°C)	R	23.2	30.6	1.5
PsiRNAiGD/+ (30°C)	R	23.6	42.2	2.5
PsiRNAiGD/+ (30°C)	R	23.7	29.3	1.5
PsiRNAiGD/+ (30°C)	R	24	32.3	2
PsiRNAiGD/+ (30°C)	A	12	-3	0
PsiRNAiGD/+ (30°C)	R	23.7	34.6	1.5
PsiRNAiGD/+ (30°C)	A	11.9	20.5	1
PsiRNAiGD/+ (30°C)	R	23.8	74.3	2
PsiRNAiGD/+ (30°C)	R	23.4	74.7	2
PsiRNAiGD/+ (30°C)	R	23.7	56.9	1.5
TD2/PsiRNAiGD (30°C)	R	22.8	42.4	2.5
TD2/PsiRNAiGD (30°C)	A	11.7	9.1	0.5
TD2/PsiRNAiGD (30°C)	R	21.9	46.2	4
TD2/PsiRNAiGD (30°C)	R	23.2	20.9	1.5
TD2/PsiRNAiGD (30°C)	R	22.5	28.2	3
TD2/PsiRNAiGD (30°C)	A	23.7	2.1	0.5
TD2/PsiRNAiGD (30°C)	R	22.2	44.8	3.5
TD2/PsiRNAiGD (30°C)	A	21	-9.9	0
TD2/PsiRNAiGD (30°C)	A	22.5	4.3	1
TD2/PsiRNAiGD (30°C)	A	11.5	-6.4	0
TD2/PsiRNAiGD (30°C)	A	22.7	16.3	1.5
TD2/PsiRNAiGD (30°C)	A	21.5	-15.1	0
TD2/PsiRNAiGD (30°C)	A	11.7	20	0.5
TD2/PsiRNAiGD (30°C)	R	22.7	39.4	2.5
TD2/PsiRNAiGD (30°C)	A	22.7	17.2	1.5
TD2/PsiRNAiGD (30°C)	R	23.2	43.1	1.5
TD2/PsiRNAiGD (30°C)	A	22.2	18.1	3.5
TD2/PsiRNAiGD (30°C)	A	22	-11.2	0
TD2/PsiRNAiGD (30°C)	A	21	-2.2	0
TD2/PsiRNAiGD (30°C)	A	23.2	10.3	1.5
TD2/PsiRNAiGD (30°C)	A	23.2	17.1	1.5
TD2/PsiRNAiGD (30°C)	R	22.8	21.5	2.5
TD2/PsiRNAiGD (30°C)	A	22.7	11.2	1.5
TD2/PsiRNAiGD (30°C)	A	22.5	7.1	1
TD2/PsiRNAiGD (30°C)	A	11.7	20.5	0.5
TD2/PsiRNAiGD (30°C)	A	20.5	-1.2	0
TD2/PsiRNAiGD (30°C)	A	11.9	7.4	1
TD2/PsiRNAiGD (30°C)	A	21	-6.5	0
TD2/PsiRNAiGD (30°C)	A	12	-20.5	0
TD2/PsiRNAiGD (30°C)	A	12	-7.3	0
TD2/PsiRNAiGD (30°C)	A	23.2	13.2	1.5
TD2/PsiRNAiGD (30°C)	R	23	40.5	2
TD2/PsiRNAiGD (30°C)	R	23.7	27.8	2.5
TD2/PsiRNAiGD (30°C)	A	22.2	2.5	0.5
TD2/PsiRNAiGD (30°C)	A	23.5	12.4	1
TD2/PsiRNAiGD (30°C)	R	22.9	58.4	3
TD2/PsiRNAiGD (30°C)	R	23.4	78.4	4
TD2/PsiRNAiGD (30°C)	R	23.2	50.1	2.5
TD2/PsiRNAiGD (30°C)	R	23.7	25.6	2.5
TD2/PsiRNAiGD (30°C)	R	23.7	20.8	1.5
TD2/PsiRNAiGD (30°C)	R	23.5	21.8	3
TD2/PsiRNAiGD (30°C)	R	23.6	41.7	3.5
PsiRNAiKK/+ (30°C)	R	23.4	68.6	2
PsiRNAiKK/+ (30°C)	R	23.7	43.8	1.5
PsiRNAiKK/+ (30°C)	R	23.4	40.4	2
PsiRNAiKK/+ (30°C)	R	23.7	41.9	2.5
PsiRNAiKK/+ (30°C)	R	23.7	50.5	2.5
PsiRNAiKK/+ (30°C)	R	23.3	62.7	2
PsiRNAiKK/+ (30°C)	R	23.6	74.3	2.5
PsiRNAiKK/+ (30°C)	R	23.4	97.8	3
PsiRNAiKK/+ (30°C)	R	23.6	70.3	2.5
PsiRNAiKK/+ (30°C)	R	23.4	77.2	3
PsiRNAiKK/+ (30°C)	R	23.2	90.6	2.5
PsiRNAiKK/+ (30°C)	R	23.4	31.6	2
PsiRNAiKK/+ (30°C)	A	23.2	20.4	0.5
PsiRNAiKK/+ (30°C)	R	23.6	96.6	2.5
PsiRNAiKK/+ (30°C)	R	23.4	36.3	2
PsiRNAiKK/+ (30°C)	R	23.4	65.7	2
PsiRNAiKK/+ (30°C)	R	24	60.2	1.5
PsiRNAiKK/+ (30°C)	A	11.8	71.3	1
PsiRNAiKK/+ (30°C)	R	23.4	78.8	2
PsiRNAiKK/+ (30°C)	R	23.5	51.7	2
PsiRNAiKK/+ (30°C)	R	23.4	51.9	2
PsiRNAiKK/+ (30°C)	A	23.5	50.8	1
PsiRNAiKK/+ (30°C)	R	23.6	34.7	1.5
PsiRNAiKK/+ (30°C)	R	23.7	43.1	2.5
PsiRNAiKK/+ (30°C)	R	23.6	67.1	2.5
PsiRNAiKK/+ (30°C)	R	23.5	47.2	2
PsiRNAiKK/+ (30°C)	R	23.6	57.9	2.5
PsiRNAiKK/+ (30°C)	R	23.5	68.6	3
PsiRNAiKK/+ (30°C)	R	23.4	88.2	2
PsiRNAiKK/+ (30°C)	R	23.7	84.2	2.5
PsiRNAiKK/+ (30°C)	R	23.6	80.9	1.5
TD2/PsiRNAiKK (30°C)	R	21.2	23.1	2.5
TD2/PsiRNAiKK (30°C)	A	21.5	12.1	3
TD2/PsiRNAiKK (30°C)	A	11.5	-3.4	0
TD2/PsiRNAiKK (30°C)	A	11.5	-1.4	0
TD2/PsiRNAiKK (30°C)	R	22.9	71.3	3
TD2/PsiRNAiKK (30°C)	A	22.4	21.8	1
TD2/PsiRNAiKK (30°C)	A	22.7	5.2	0.5
TD2/PsiRNAiKK (30°C)	A	24.2	5.2	0.5
TD2/PsiRNAiKK (30°C)	A	22	16.2	4
TD2/PsiRNAiKK (30°C)	R	23.2	22.4	1.5
TD2/PsiRNAiKK (30°C)	A	11.5	-2.3	0
TD2/PsiRNAiKK (30°C)	A	22.7	10.5	0.5
TD2/PsiRNAiKK (30°C)	R	23.4	31.2	3
TD2/PsiRNAiKK (30°C)	A	20.7	1.3	0.5
TD2/PsiRNAiKK (30°C)	A	20.7	12.6	0.5
TD2/PsiRNAiKK (30°C)	R	23.4	64.6	3
TD2/PsiRNAiKK (30°C)	A	11.9	1.9	1
TD2/PsiRNAiKK (30°C)	R	23.2	54.1	3.5
TD2/PsiRNAiKK (30°C)	A	21.2	16.7	2.5
TD2/PsiRNAiKK (30°C)	A	11.5	-2	0
TD2/PsiRNAiKK (30°C)	R	22.1	61	4.5
TD2/PsiRNAiKK (30°C)	A	11.2	1	0.5
TD2/PsiRNAiKK (30°C)	R	23	49.3	1.5
TD2/PsiRNAiKK (30°C)	A	21.7	7.1	1.5
TD2/PsiRNAiKK (30°C)	R	22.4	31.3	2
TD2/PsiRNAiKK (30°C)	A	22.5	-5.1	0
TD2/PsiRNAiKK (30°C)	A	22.7	6.1	0.5
TD2/PsiRNAiKK (30°C)	R	21.9	20	3
TD2/PsiRNAiKK (30°C)	A	22	10.9	3
TD2/PsiRNAiKK (30°C)	A	22	-7.3	0
TD2/PsiRNAiKK (30°C)	R	22.7	37.7	3.5
TD2/PsiRNAiKK (30°C)	R	23.2	57	3.5
TD2/PsiRNAiKK (30°C)	R	23	20.7	2
TD2/PsiRNAiKK (30°C)	A	22	5.9	1
TD2/PsiRNAiKK (30°C)	A	23.5	-1.5	0
TD2/PsiRNAiKK (30°C)	A	22.7	6.9	1.5
TD2/PsiRNAiKK (30°C)	R	23	30.9	4
TD2/PsiRNAiKK (30°C)	R	23.7	40.1	2.5
TD2/PsiRNAiKK (30°C)	A	11.5	-3.7	0
TD2/PsiRNAiKK (30°C)	R	23.2	55	3.5
TD2/PsiRNAiKK (30°C)	R	22.8	63.8	4.5
25°C to end
PD2/+	R	25.5	37.7	3
PD2/+	R	25.4	74.7	4
PD2/+	R	24.7	34.3	2.5
PD2/+	R	24.7	31.5	2.5
PD2/+	R	24.7	51.2	3.5
PD2/+	R	25.2	61.9	3.5
PD2/+	R	25.1	56.7	3.5
PD2/+	R	25	27.5	2
PD2/+	R	24.9	50	3
PD2/+	R	24.9	59.4	3
PD2/+	R	24.9	68.5	3
PD2/+	R	24.7	33.1	2.5
PD2/+	A	24.5	-5.4	0
PD2/+	R	25.2	42.8	3.5
PD2/+	R	24.9	57.2	3
PD2/+	R	24.9	44.5	3
PD2/+	R	24.6	63.7	3.5
PD2/+	R	24.7	29.7	2.5
PD2/+	R	24.8	42.7	2.5
PD2/+	R	24.3	40.8	3.5
PD2/+	A	25	-1.8	0
PD2/+	R	24.7	54.2	3.5
PD2/+	R	25.1	87.2	3.5
PD2/+	R	24.7	65.2	3.5
PD2/+	R	24.6	87.1	3.5
PD2/+	R	24.7	28.2	2.5
PD2/+	R	24.7	47.1	3.5
PD2/+	R	24.4	55.8	3
PD2/+	R	24.4	62.6	4
PD2/+	A	24.5	28.2	1
PD2/+	R	25	49.5	3
PD2/+	R	25.2	52.6	3.5
PD2/+	R	24.5	46.2	3
PD2/+	A	24.5	-6.7	0
PD2/+	R	26.2	31.4	4.5
PD2/+	R	24.7	42.2	2.5
PD2/+	R	25.1	42.2	2.5
PD2/+	R	24.9	40.1	3
PD2/+	R	24.7	42.1	2.5
PD2/+	R	24.6	30.9	2.5
PD2/+	R	25.4	57.6	3
PD2/+	R	24.8	49.8	3
PD2/+	R	25.2	62.6	4.5
PD2/+	R	24.9	60.8	3
PD2/+	R	24.6	54.3	3.5
PD2/+	A	13.5	-2.2	0
PD2/+	R	24.5	23.5	3
PD2/+	R	25.1	45.4	2.5
PD2/+	R	25.1	80.8	3.5
PD2/+	R	24.5	54.3	2
PD2/+	R	24.6	72.7	3.5
PD2/+	R	25.4	31.4	3
PD2/+	R	24.9	78.6	3
PD2/+	A	29	-6.1	0
PD2/+	R	24.6	36.5	2.5
PD2/+	A	25.2	10.1	2.5
PD2/+	R	24.7	27.4	2.5
PD2/+	R	24.7	20.3	1.5
PD2/+	A	24.7	6.7	1.5
PD2/+	R	25	34.6	4
PD2/+	R	25.2	62	3.5
PD2/+	R	24.6	73.8	3.5
PD2/+	A	25.7	4.6	0.5
PD2/+	A	24.7	10.9	1.5
PD2/+	A	25	12.8	2
PD2/+	A	25.5	19.9	2
PD2/+	R	24.6	86.9	3.5
PD2/+	R	24.6	77.5	3.5
PD2/+	R	24.5	34.2	2
PD2/+	A	25	16.4	1
PD2/+	R	24.9	50.6	3
PD2/+	R	24.9	46.2	3
PD2/+	R	24.7	50.8	2.5
PD2/+	R	24.9	36.4	2
PD2/+	R	24.4	54.7	3
PD2/+	R	24.8	68	3
PD2/+	R	25.1	23	2.5
PD2/PsiRNAiGD	A	24.7	13.4	1.5
PD2/PsiRNAiGD	A	12	19.5	1
PD2/PsiRNAiGD	R	23.7	25.6	2.5
PD2/PsiRNAiGD	R	23.9	31.7	3
PD2/PsiRNAiGD	R	24.2	32.6	2.5
PD2/PsiRNAiGD	A	24.3	14.7	2.5
PD2/PsiRNAiGD	R	24.2	26.3	2.5
PD2/PsiRNAiGD	R	24.9	40.4	4
PD2/PsiRNAiGD	R	24.3	63.4	3
PD2/PsiRNAiGD	R	24.1	78.2	3.5
PD2/PsiRNAiGD	R	24.2	39.5	2.5
PD2/PsiRNAiGD	R	23.9	64.3	3
PD2/PsiRNAiGD	R	24.2	64.2	3.5
PD2/PsiRNAiGD	R	24	90.5	3.5
PD2/PsiRNAiGD	A	23.7	17.7	0.5
PD2/PsiRNAiGD	A	10.5	-2.7	0
PD2/PsiRNAiGD	R	24.2	25.2	1.5
PD2/PsiRNAiGD	R	24.2	69.3	4.5
PD2/PsiRNAiGD	R	25.1	34.5	3.5
PD2/PsiRNAiGD	R	24.4	51.8	3
PD2/PsiRNAiGD	R	24.3	64.9	3
PD2/PsiRNAiGD	R	24.3	83.6	3
PD2/PsiRNAiGD	R	24.7	20.2	2.5
PD2/PsiRNAiGD	R	24.2	37.5	2.5
PD2/PsiRNAiGD	R	23.7	73.7	3.5
PD2/PsiRNAiGD	R	23.9	53	3
PD2/PsiRNAiGD	R	24.2	71.6	3.5
PD2/PsiRNAiGD	R	23.9	86.4	3
PD2/PsiRNAiGD	R	24	24.2	2
PD2/PsiRNAiGD	R	23.9	55.1	3
PD2/PsiRNAiGD	R	24.3	72.2	4
PD2/PsiRNAiGD	R	24.1	60.1	3.5
PD2/PsiRNAiKK	R	24.9	37.9	4
PD2/PsiRNAiKK	R	25.4	35.8	3
PD2/PsiRNAiKK	R	24.4	37.3	3
PD2/PsiRNAiKK	R	24.4	50.3	4
PD2/PsiRNAiKK	R	25.2	21.1	4.5
PD2/PsiRNAiKK	R	24.9	45.4	3
PD2/PsiRNAiKK	R	24.9	32	3
PD2/PsiRNAiKK	R	24.9	63.8	3
PD2/PsiRNAiKK	R	24	74.2	4
PD2/PsiRNAiKK	R	24.4	59.1	4
PD2/PsiRNAiKK	A	25	-1.3	0
PD2/PsiRNAiKK	A	23.7	19.4	2.5
PD2/PsiRNAiKK	R	24.9	26.8	3
PD2/PsiRNAiKK	R	24.6	67.9	4.5
PD2/PsiRNAiKK	R	24.9	31.9	2
PD2/PsiRNAiKK	R	24.5	88.5	3.5
PD2/PsiRNAiKK	R	24.4	82.9	4
PD2/PsiRNAiKK	R	24.4	84.6	4
PD2/PsiRNAiKK	R	25.1	70.1	4.5
PD2/PsiRNAiKK	R	24.2	107.2	4.5
PD2/PsiRNAiKK	R	24.3	92.5	5
PD2/PsiRNAiKK	R	24.6	87.9	3.5
PD2/PsiRNAiKK	R	24.6	70.2	3.5
PD2/PsiRNAiKK	R	24.9	78.9	5
PD2/PsiRNAiKK	R	24.6	63.2	3.5
PD2/PsiRNAiKK	R	25.1	58.2	4.5
PD2/PsiRNAiKK	R	24.6	56.2	2.5
PD2/PsiRNAiKK	R	24.8	80.7	3
PD2/PsiRNAiKK	R	24.9	37.3	3
PD2/PsiRNAiKK	R	23.9	34	3
PD2/PsiRNAiKK	R	24.4	46	4
PD2/PsiRNAiKK	R	24.6	68	3.5
PD2/PsiRNAiKK	R	24.8	87.7	4
PD2/PsiRNAiKK	R	24.7	32.2	2.5
PD2/PsiRNAiKK	R	24.9	55.1	5
PD2/PsiRNAiKK	R	25.1	57.7	4.5
PD2/PsiRNAiKK	A	12.4	6.4	1
PD2/PsiRNAiKK	A	24.4	15.7	2
PD2/PsiRNAiKK	R	24.5	43.2	3
PD2/PsiRNAiKK	R	25.2	47.3	3.5
PD2/PsiRNAiKK	R	24.3	71.8	4
PD2/PsiRNAiKK	R	25.2	23.8	2.5
PD2/PsiRNAiKK	R	24.8	46.3	2.5
PD2/PsiRNAiKK	R	24.7	20.1	2.5
PD2/PsiRNAiKK	A	24	19.6	1
PD2/PsiRNAiKK	R	24.2	59.4	3.5
PD2/PsiRNAiKK	R	23.6	31.7	3.5
TD2/+; PdfGAL80/+	R	24.9	53.9	4
TD2/+; PdfGAL80/+	R	23.9	21.6	2
TD2/+; PdfGAL80/+	R	24.4	52.7	3
TD2/+; PdfGAL80/+	R	24.1	88.2	3.5
TD2/+; PdfGAL80/+	R	24.5	45.8	3
TD2/+; PdfGAL80/+	R	24.2	44.3	3.5
TD2/+; PdfGAL80/+	R	24.4	44.9	3
TD2/+; PdfGAL80/+	R	24.4	43.9	3
TD2/+; PdfGAL80/+	R	24.9	79.5	4
TD2/+; PdfGAL80/+	R	24	35.3	2
TD2/+; PdfGAL80/+	R	24.6	43.7	3.5
TD2/+; PdfGAL80/+	A	25	-6.8	0
TD2/+; PdfGAL80/+	A	10	-1.8	0
TD2/+; PdfGAL80/+	R	24.7	46.8	3.5
TD2/+; PdfGAL80/+	A	24	17.5	2
TD2/+; PdfGAL80/+	A	24.2	17.7	1.5
TD2/+; PdfGAL80/+	R	24	37.7	3
TD2/+; PdfGAL80/+	A	24.5	11.1	1
TD2/+; PdfGAL80/+	R	24.9	39.9	3
TD2/+; PdfGAL80/+	R	25	58.2	4
TD2/+; PdfGAL80/+	R	24.6	50.8	3.5
TD2/+; PdfGAL80/+	R	24.5	74.7	3.5
TD2/+; PdfGAL80/+	R	24.4	51.9	3
TD2/+; PdfGAL80/+	R	25.2	63.2	4.5
TD2/+; PdfGAL80/+	R	24.6	43.5	3.5
TD2/+; PdfGAL80/+	R	24.9	54.4	4
TD2/+; PdfGAL80/+	A	24	-4.9	0
TD2/+; PdfGAL80/+	A	24	14.4	1
TD2/+; PdfGAL80/+	A	23.9	18.9	2
TD2/+; PdfGAL80/+	R	24.7	26.4	3.5
TD2/+; PdfGAL80/+	R	24	49.4	3
TD2/+; PdfGAL80/+	R	24.2	48.9	3.5
TD2/+; PdfGAL80/+	R	24.4	50.7	3
TD2/+; PdfGAL80/+	R	24.7	44.9	3.5
TD2/+; PdfGAL80/+	R	24	20.4	2
TD2/+; PdfGAL80/+	R	24.7	40.6	2.5
TD2/+; PdfGAL80/+	A	23.7	7.5	0.5
TD2/+; PdfGAL80/+	R	24.4	56.2	4
TD2/+; PdfGAL80/+	A	23.5	-3.8	0
TD2/+; PdfGAL80/+	R	23.7	71	3.5
TD2/PsiRNAiGD; PdfGAL80/+	R	24.6	49.4	3.5
TD2/PsiRNAiGD; PdfGAL80/+	R	24.2	57.7	3.5
TD2/PsiRNAiGD; PdfGAL80/+	R	24.1	89.5	4.5
TD2/PsiRNAiGD; PdfGAL80/+	R	22.9	51.7	4
TD2/PsiRNAiGD; PdfGAL80/+	A	23.7	14.6	1.5
TD2/PsiRNAiGD; PdfGAL80/+	R	23.9	45.4	3
TD2/PsiRNAiGD; PdfGAL80/+	A	24	18.2	2
TD2/PsiRNAiGD; PdfGAL80/+	A	40	-19.4	0
TD2/PsiRNAiGD; PdfGAL80/+	A	14	-2.7	0
TD2/PsiRNAiGD; PdfGAL80/+	A	24	-1.5	0
TD2/PsiRNAiGD; PdfGAL80/+	R	23.9	35.6	2
TD2/PsiRNAiGD; PdfGAL80/+	A	23	-6.8	0
TD2/PsiRNAiGD; PdfGAL80/+	R	22.8	20.2	2.5
TD2/PsiRNAiGD; PdfGAL80/+	A	23	-7	0
TD2/PsiRNAiGD; PdfGAL80/+	A	10.5	-14.9	0
TD2/PsiRNAiGD; PdfGAL80/+	R	23.6	45.7	2.5
TD2/PsiRNAiGD; PdfGAL80/+	A	24.5	-11.5	0
TD2/PsiRNAiGD; PdfGAL80/+	A	23.5	24.8	1
TD2/PsiRNAiGD; PdfGAL80/+	R	23.7	62.2	2.5
TD2/PsiRNAiGD; PdfGAL80/+	A	22.5	-11.4	0
TD2/PsiRNAiGD; PdfGAL80/+	R	23	39.9	3
TD2/PsiRNAiGD; PdfGAL80/+	R	24.4	24.2	3
TD2/PsiRNAiGD; PdfGAL80/+	R	24.3	27.7	3
TD2/PsiRNAiGD; PdfGAL80/+	A	23.2	17.3	0.5
TD2/PsiRNAiKK; PdfGAL80/+	A	25.2	12.3	0.5
TD2/PsiRNAiKK; PdfGAL80/+	R	24	35.4	3
TD2/PsiRNAiKK; PdfGAL80/+	R	24.2	52.1	4.5
TD2/PsiRNAiKK; PdfGAL80/+	R	24.3	83	5
TD2/PsiRNAiKK; PdfGAL80/+	A	23.5	17.4	1
TD2/PsiRNAiKK; PdfGAL80/+	R	23.9	73.3	4
TD2/PsiRNAiKK; PdfGAL80/+	R	23.4	29.4	2
TD2/PsiRNAiKK; PdfGAL80/+	R	24.1	91.4	3.5
TD2/PsiRNAiKK; PdfGAL80/+	R	24.5	60.8	4.5
TD2/PsiRNAiKK; PdfGAL80/+	R	24.2	56.8	4.5
TD2/PsiRNAiKK; PdfGAL80/+	R	23.4	26.1	2
TD2/PsiRNAiKK; PdfGAL80/+	R	23.8	112.1	5
TD2/PsiRNAiKK; PdfGAL80/+	R	24.1	67.7	3.5
TD2/PsiRNAiKK; PdfGAL80/+	R	24.5	77	4.5
TD2/PsiRNAiKK; PdfGAL80/+	R	23.7	110	4.5
TD2/PsiRNAiKK; PdfGAL80/+	R	23.9	88.4	4
TD2/PsiRNAiKK; PdfGAL80/+	R	23.9	56.5	3
TD2/PsiRNAiKK; PdfGAL80/+	R	23.6	79.6	3.5
TD2/PsiRNAiKK; PdfGAL80/+	R	23.9	29.9	3
TD2/PsiRNAiKK; PdfGAL80/+	R	24.1	62.7	3.5
TD2/PsiRNAiKK; PdfGAL80/+	R	23.4	82.8	4
TD2/PsiRNAiKK; PdfGAL80/+	R	23.9	102.2	5
TD2/PsiRNAiKK; PdfGAL80/+	R	23.7	78.1	3.5
TD2/PsiRNAiKK; PdfGAL80/+	R	24.1	101	4.5
TD2/PsiRNAiKK; PdfGAL80/+	R	24.3	104.7	4
TD2/PsiRNAiKK; PdfGAL80/+	R	24.4	45	4
TD2/PsiRNAiKK; PdfGAL80/+	R	24.3	79.7	5
TD2/PsiRNAiKK; PdfGAL80/+	R	24.3	88.5	4
TD2/PsiRNAiKK; PdfGAL80/+	R	24.4	64.2	4
TD2/PsiRNAiKK; PdfGAL80/+	R	24.8	79.9	4
TD2/PsiRNAiKK; PdfGAL80/+	R	23.9	88.4	4
TD2/PsiRNAiKK; PdfGAL80/+	R	24.3	81.4	5
TD2/PsiRNAiKK; PdfGAL80/+	R	23.8	92.4	5
TD2/PsiRNAiKK; PdfGAL80/+	R	23.7	63.6	3.5
TD2/PsiRNAiKK; PdfGAL80/+	R	23.9	79.7	3
TD2/PsiRNAiKK; PdfGAL80/+	R	23.8	98.5	4
TD2/PsiRNAiKK; PdfGAL80/+	R	23.9	39.4	3
TD2/PsiRNAiKK; PdfGAL80/+	R	23.9	22.9	2
TD2/PsiRNAiKK; PdfGAL80/+	R	23.9	74.4	4
UAS-Psi/+	R	24.4	31.5	2
UAS-Psi/+	A	24.7	1	0.5
UAS-Psi/+	R	23.7	58.4	2.5
UAS-Psi/+	R	24.9	47.5	5
UAS-Psi/+	R	24	35.7	3
UAS-Psi/+	R	24	33	3
UAS-Psi/+	A	24.2	15.1	1.5
UAS-Psi/+	A	24	8	2
UAS-Psi/+	R	24.2	33.1	2.5
UAS-Psi/+	R	24.6	34.1	3.5
UAS-Psi/+	R	23.9	50.3	3
UAS-Psi/+	A	23.7	6.7	0.5
UAS-Psi/+	R	24.2	32.4	2.5
UAS-Psi/+	R	23.9	45.5	3
UAS-Psi/+	R	24.4	57.7	3
UAS-Psi/+	R	24.6	36.4	3.5
UAS-Psi/+	A	24	6	1
UAS-Psi/+	A	24.2	16	2.5
UAS-Psi/+	A	23.5	-4.8	0
UAS-Psi/+	R	24.9	37.6	4
UAS-Psi/+	A	24.2	15.8	1.5
UAS-Psi/+	R	24.4	65	3
UAS-Psi/+	R	24.5	38	3
UAS-Psi/+	R	24.2	39	2.5
UAS-Psi/+	R	24.2	43.4	2.5
UAS-Psi/+	A	25.2	1.4	0.5
UAS-Psi/+	R	24.2	65	2.5
UAS-Psi/+	R	24.4	38	2
UAS-Psi/+	R	24.7	31.1	3.5
UAS-Psi/+	A	24.2	5.5	0.5
UAS-Psi/+	A	19	-2.3	0
UAS-Psi/+	R	24.5	37.9	2
UAS-Psi/+	R	24.3	73.5	3
UAS-Psi/+	R	24.4	32.2	3
UAS-Psi/+	R	23.9	43.9	2
UAS-Psi/+	R	24.6	62.8	3.5
UAS-Psi/+	R	24.2	76.1	3.5
UAS-Psi/+	R	24.3	76.8	3
UAS-Psi/+	R	24.2	43.1	3.5
UAS-Psi/+	R	23.7	37	2.5
UAS-Psi/+	R	24.2	32.2	3.5
UAS-Psi/+	R	24.2	36	2.5
UAS-Psi/+	A	22.5	-0.3	0
UAS-Psi/+	R	24.5	60.6	4
UAS-Psi/+	R	24.2	39.3	2.5
UAS-Psi/+	A	23.5	15.7	1
UAS-Psi/+	R	23.7	38.7	2.5
UAS-Psi/+	R	24.2	49.2	2.5
UAS-Psi/+	R	24.4	26.9	2
UAS-Psi/+	R	23.7	69.8	2.5
UAS-Psi/+	R	24.2	48	2.5
UAS-Psi/+	R	23.9	38.1	2
UAS-Psi/+	R	24.2	52.4	3.5
UAS-Psi/+	R	24.2	74.1	3.5
UAS-Psi/+	R	24.3	77.1	3
UAS-Psi/+	R	24.5	34.8	3
UAS-Psi/+	R	24.2	27.7	2.5
UAS-Psi/+	R	24.6	37.4	3.5
UAS-Psi/+	A	16.1	16.8	0.5
UAS-Psi/+	R	23.9	36.5	2
UAS-Psi/+	R	24.4	51.6	3
UAS-Psi/+	R	24.7	38.5	2.5
UAS-Psi/+	R	24.2	73.1	3.5
UAS-Psi/+	R	23.9	45.4	2
UAS-Psi/+	R	23.7	38.5	3.5
UAS-Psi/+	R	23.7	39.2	2.5
UAS-Psi/+	R	24.2	37.7	3.5
UAS-Psi/+	R	24.1	50.9	2.5
UAS-Psi/+	R	24.2	47	3.5
UAS-Psi/+	R	24.2	39.8	2.5
UAS-Psi/+	R	23.8	75.1	3
UAS-Psi/+	R	23.7	32.5	2.5
UAS-Psi/+	R	24.2	42.3	2.5
UAS-Psi/+	A	24.2	16.8	1.5
UAS-Psi/+	R	24	48.1	2
UAS-Psi/+	R	24.1	66.5	2.5
UAS-Psi/+	R	24.2	27.9	1.5
UAS-Psi/+	A	24	16	3
UAS-Psi/+	R	24.2	51.4	1.5
UAS-Psi/+	A	24.2	11.7	1.5
TG4/+	R	25.6	43.1	3.5
TG4/+	R	25.1	53	2.5
TG4/+	R	24.7	35.7	3.5
TG4/+	R	25.4	86.3	4
TG4/+	R	24.9	75.1	3
TG4/+	R	24.4	42.5	3
TG4/+	R	25.4	62.6	4
TG4/+	R	25.6	72	3.5
TG4/+	R	26.1	90.7	4.5
TG4/+	R	25.4	60.6	4
TG4/+	R	25.7	90.6	4.5
TG4/+	A	25	15	1
TG4/+	R	25.2	55.9	3.5
TG4/+	R	25.4	39	3
TG4/+	R	25.5	24.1	2
TG4/+	R	25.2	52	3.5
TG4/+	R	25.6	62.5	3.5
TG4/+	R	24.7	54.9	3.5
TG4/+	R	24.7	56.1	4.5
TG4/+	R	25.8	76.6	5
TG4/+	R	25.2	56.9	3.5
TG4/+	A	25.2	31.3	0.5
TG4/+	A	25.5	6.5	2
TG4/+	R	25.2	52.4	2.5
TG4/+	A	25.2	17.4	2.5
TG4/+	R	25	43.8	4
TG4/+	R	25.2	56.2	4.5
TG4/+	R	25	56.3	4
TG4/+	R	25.2	30.5	2.5
TG4/+	R	25.2	42.4	3.5
TG4/+	A	25	4.6	1
TG4/+	A	25	15.9	1
TG4/+	R	25.2	53.3	4.5
TG4/+	R	25.4	64.6	5
TG4/+	R	25.2	55.4	4.5
TG4/+	R	25.4	67.8	4
TG4/+	R	25.2	46.9	3.5
TG4/+	R	25.2	52.8	1
TG4/+	R	26.2	64.7	1
TG4/+	R	25.4	60.3	1
TG4/+	R	25.4	72.9	1
TG4/+	R	25.2	48.5	1
TG4/+	R	25.6	59.4	1
TG4/+	R	25.9	69.1	1
TG4/+	R	25.3	31.1	3.5
TG4/+	R	25.4	52.5	3
TG4/+	R	25.5	21.2	3
TG4/+	R	25.4	60	4
TG4/+	R	24.9	80.6	4
TG4/+	R	25.4	38.4	4
TG4/+	A	25	15.1	2
TG4/+	R	25.2	49.8	4.5
TG4/+	R	24.2	26.7	2.5
TG4/+	R	25	50.7	4
TG4/+	A	24.7	11.3	0.5
TG4/+	R	24.8	68.7	4
TG4/+	R	25	27.9	3
TG4/+	R	24.9	20.6	3
TG4/+	R	24.9	45.4	4
TG4/+	R	24.5	20	3
TG4/+	R	25.2	62.2	4.5
TG4/+	R	25	25.8	3
TG4/+	R	24.7	41.2	3.5
TG4/+	R	24.9	25.9	3
TG4/+	R	24.7	44	3.5
TG4/+	R	25.6	56.3	4.5
TG4/+	R	25.4	74.6	4
TG4/+	R	25.9	39.7	4
TG4/+; UAS-Psi/+	A	26.2	17.5	0.5
TG4/+; UAS-Psi/+	A	25.2	5	0.5
TG4/+; UAS-Psi/+	A	20	-6.4	0
TG4/+; UAS-Psi/+	A	26.2	16.5	2.5
TG4/+; UAS-Psi/+	A	25	-5.5	0
TG4/+; UAS-Psi/+	R	26	31.5	4
TG4/+; UAS-Psi/+	A	26.5	-3.2	0
TG4/+; UAS-Psi/+	R	26.4	33.7	3
TG4/+; UAS-Psi/+	A	26.3	16.3	2.5
TG4/+; UAS-Psi/+	A	25.2	17.6	0.5
TG4/+; UAS-Psi/+	R	25.9	43.3	4
TG4/+; UAS-Psi/+	A	25	4.1	1
TG4/+; UAS-Psi/+	A	26.7	13.3	0.5
TG4/+; UAS-Psi/+	A	25.7	13.1	0.5
TG4/+; UAS-Psi/+	A	25	-0.7	0
TG4/+; UAS-Psi/+	A	28.2	4.4	0.5
TG4/+; UAS-Psi/+	A	24.2	1.8	0.5
TG4/+; UAS-Psi/+	A	24.7	1.3	0.5
TG4/+; UAS-Psi/+	A	24.2	13.7	1.5
TG4/+; UAS-Psi/+	A	24.7	24.6	0.5
TG4/+; UAS-Psi/+	A	24.7	2.7	0.5
TG4/+; UAS-Psi/+	R	24.7	40	2.5
TG4/+; UAS-Psi/+	A	25.7	12.2	1.5
TG4/+; UAS-Psi/+	A	38.2	18.9	0.5
TG4/+; UAS-Psi/+	R	26	23.3	4
TG4/+; UAS-Psi/+	A	26	11.1	1
TG4/+; UAS-Psi/+	A	26.5	11.1	3
TG4/+; UAS-Psi/+	A	26.2	9.9	0.5
TG4/+; UAS-Psi/+	A	19.5	-7.2	0
TG4/+; UAS-Psi/+	A	26	-5.7	0
TG4/+; UAS-Psi/+	A	25	8.4	1
TG4/+; UAS-Psi/+	A	26.5	16	2
TG4/+; UAS-Psi/+	A	18.5	-8.9	0
TG4/+; UAS-Psi/+	A	27.7	4.9	0.5
TG4/+; UAS-Psi/+	A	28	-6.3	0
TG4/+; UAS-Psi/+	A	30	-9.5	0
TG4/+; UAS-Psi/+	A	25	-2.4	0
TG4/+; UAS-Psi/+	A	25.7	12.6	2.5
TG4/+; UAS-Psi/+	A	24.5	3.7	1
TG4/+; UAS-Psi/+	A	29.5	-9.8	0
TG4/+; UAS-Psi/+	A	24.5	12.8	1
TG4/+; UAS-Psi/+	A	26	-2.4	0
TG4/+; UAS-Psi/+	A	26.5	-4.5	0
TG4/+; UAS-Psi/+	A	28.5	-6	0
TG4/+; UAS-Psi/+	A	25	-1.9	0
TG4/+; UAS-Psi/+	A	24.7	4	0.5
TG4/+; UAS-Psi/+	A	26.2	2	0.5
TG4/+; UAS-Psi/+	A	24.2	9.1	0.5
TG4/+; UAS-Psi/+	A	26.7	1.1	0.5
TG4/+; UAS-Psi/+	A	25	-3.6	0
TG4/+; UAS-Psi/+	A	24.5	-8.6	0
TG4/+; UAS-Psi/+	A	26.7	10.2	0.5
TG4/+; UAS-Psi/+	A	20.5	-0.9	0
TG4/+; UAS-Psi/+	A	14.5	-2.3	0
TG4/+; UAS-Psi/+	A	36.7	12.9	0.5
TG4/+; UAS-Psi/+	A	26	8.2	3
TG4/+; UAS-Psi/+	A	27.2	0.9	0.5
TG4/+; UAS-Psi/+	A	17.2	12.7	0.5
TG4/+; UAS-Psi/+	A	26.7	0.4	0.5
TG4/+; UAS-Psi/+	A	26.5	-10.7	0
TG4/+; UAS-Psi/+	A	22.5	-7	0
TG4/+; UAS-Psi/+	A	24.2	12.1	0.5
TG4/+; UAS-Psi/+	A	25.9	16.2	1
TG4/+; UAS-Psi/+	A	12.5	-2	0
TG4/+; UAS-Psi/+	A	27.2	3.8	0.5
TG4/+; UAS-Psi/+	A	26.7	9.4	0.5
TG4/+; UAS-Psi/+	A	28.5	-4.9	0
TG4/+; UAS-Psi/+	A	26.7	1.6	0.5
TG4/+; UAS-Psi/+	R	26.5	31.8	2
TG4/+; UAS-Psi/+	A	25.2	16.4	1.5
TG4/+; UAS-Psi/+	A	27.2	2.2	0.5
TG4/+; UAS-Psi/+	A	26.2	1.9	0.5
TG4/+; UAS-Psi/+	A	26	22.5	1
TG4/+; UAS-Psi/+	A	30	-2.9	0
TG4/+; UAS-Psi/+	A	24.7	4.9	0.5
TG4/+; UAS-Psi/+	A	23.2	9.9	0.5
TG4/+; UAS-Psi/+	A	25.7	23.9	0.5
TG4/+; UAS-Psi/+	A	27	-8.3	0
TG4/+; UAS-Psi/+	A	23.7	4.5	0.5
TG4/+; UAS-Psi/+	A	16.5	-10.6	0
TG4/+; UAS-Psi/+	A	25.5	-4.6	0
TG4/+; UAS-Psi/+	A	25	10.6	3
TG4/+; UAS-Psi/+	A	27	8.2	1
TG4/+; UAS-Psi/+	A	18.5	-1.3	0
TG4/+; UAS-Psi/+	A	25.5	-3.2	0
TG4/+; UAS-Psi/+	A	23.5	-3.2	0
TG4/+; UAS-Psi/+	A	24.7	4.5	0.5
TG4/+; UAS-Psi/+	A	11.5	-8.2	0
TG4/+; UAS-Psi/+	A	25.5	13	1
TG4/+; UAS-Psi/+	A	26.2	1.6	0.5
TG4/+; UAS-Psi/+	R	25.2	41.5	1.5
TG4/+; UAS-Psi/+	A	27.2	4.8	0.5
TG4/+; UAS-Psi/+	A	17	-6.6	0
TG4/+; UAS-Psi/+	A	12	-10.2	0
TG4/+; UAS-Psi/+	A	26.2	6.5	0.5
TG4/+; UAS-Psi/+	A	25.7	1	0.5
TG4/+; UAS-Psi/+	R	26.2	31.1	3.5
TG4/+; UAS-Psi/+	R	25.7	29.6	2.5
TG4/+; UAS-Psi/+	A	26.2	2.7	0.5
TG4/+; UAS-Psi/+	A	26.7	15.9	2.5
TG4/+; UAS-Psi/+	A	26.7	7.9	1.5
TG4/+; UAS-Psi/+	A	25.9	15.3	2
TG4/+; UAS-Psi/+	A	26.7	1	0.5
TG4/+; UAS-Psi/+	A	26.5	9.4	1
TG4/+; UAS-Psi/+	R	25.4	26.5	2
TG4/+; UAS-Psi/+	A	23.4	17.2	1
TG4/+; UAS-Psi/+	A	15.5	-4.8	0
TG4/+; UAS-Psi/+	R	26.1	39.3	4
TG4/+; UAS-Psi/+	R	25.8	34.9	3.5
TG4/+; UAS-Psi/+	R	25.2	29.4	1.5
TG4/+; UAS-Psi/+	A	26.5	-0.4	0
TG4/+; UAS-Psi/+	A	25.7	4.8	0.5
TG4/+; UAS-Psi/+	A	24.5	-9.2	0
TG4/+; UAS-Psi/+	A	26	13.5	1
TG4/+; UAS-Psi/+	A	24.2	5.5	0.5
TG4/+; UAS-Psi/+	R	25.7	40.9	3.5
TG4/+; UAS-Psi/+	A	25.5	14.3	1
TG4/+; UAS-Psi/+	A	27	16.4	1
TG4/+; UAS-Psi/+	A	25.2	3.8	0.5
TG4/+; UAS-Psi/+	A	24	-0.4	0
TG4/+; UAS-Psi/+	A	24.5	-0.6	0
TG4/+; UAS-Psi/+	A	24.2	14.7	0.5
TG4/+; UAS-Psi/+	A	24.7	9.8	0.5
TG4/+; UAS-Psi/+	R	25.8	36.2	3.5
TG4/+; UAS-Psi/+	A	25.7	15.2	2.5
TG4/+; UAS-Psi/+	A	28.9	12.8	1
TG4/+; UAS-Psi/+	A	25.7	20.5	0.5
TG4/+; UAS-Psi/+	A	25.7	5.9	0.5
TG4/+; UAS-Psi/+	R	26	40.5	4
TG4/+; UAS-Psi/+	A	26.5	16.3	1
TG4/+; UAS-Psi/+	A	25.7	3	0.5
TG4/+; UAS-Psi/+	A	25.5	-8.1	0
TG4/+; UAS-Psi/+	R	26.5	40.9	5
TG4/+; UAS-Psi/+	A	25.2	10.2	0.5
TG4/+; UAS-Psi/+	A	27.2	7.8	1.5
TG4/+; UAS-Psi/+	A	26	17.1	2
TG4/+; UAS-Psi/+	R	26.2	31.1	2.5
TG4/+; UAS-Psi/+	R	26	39.1	4
TG4/+; UAS-Psi/+	A	25.7	2.3	0.5
TG4/+; UAS-Psi/+	A	24.2	0.8	0.5
TG4/+; UAS-Psi/+	A	26	-6.1	0
TG4/+; UAS-Psi/+	A	26	19.5	2
TG4/+; UAS-Psi/+	A	26.2	14.9	0.5
TG4/+; UAS-Psi/+	A	26	5.5	1
TG4/+; UAS-Psi/+	A	23.2	2.6	0.5
TG4/+; UAS-Psi/+	A	26	17.6	2
TG4/+; UAS-Psi/+	A	25.7	17.1	3.5
TG4/+; UAS-Psi/+	R	25.8	25.5	3.5
TG4/+; UAS-Psi/+	A	25.7	19.6	1.5
TG4/+; UAS-Psi/+	A	26.7	18.5	2.5
TG4/+; UAS-Psi/+	R	26.2	24.8	3.5
TG4/+; UAS-Psi/+	A	25.5	20.3	1
TG4/+; UAS-Psi/+	R	26.1	46.9	3.5
TG4/+; UAS-Psi/+	R	25.8	20.9	1.5
TG4/+; UAS-Psi/+	A	25	18.4	1
TG4/+; UAS-Psi/+	A	25.5	15.9	3
TG4/+; UAS-Psi/+	R	25.7	25.6	2.5
TG4/+; UAS-Psi/+	R	25.2	21.9	2.5
TG4/+; UAS-Psi/+	A	24.9	19	2
TG4/+; UAS-Psi/+	A	25.7	17.9	1.5
TG4/+; UAS-Psi/+	A	26.7	7.6	0.5
TG4/+; UAS-Psi/+	A	17.5	-3.5	0
TG4/+; UAS-Psi/+	A	24.2	14.6	0.5
TG4/+; UAS-Psi/+	R	25	31.5	3
TG4/+; UAS-Psi/+	A	25.7	4.6	0.5
TG4/+; UAS-Psi/+	A	16.2	10.1	0.5
TG4/+; UAS-Psi/+	A	25.5	-1.5	0
TG4/+; UAS-Psi/+	A	26.2	2	0.5
TG4/+; UAS-Psi/+	A	29.2	2.6	0.5
TG4/+; UAS-Psi/+	A	26.4	10.5	1
TG4/+; UAS-Psi/+	R	26.2	22.2	1.5
TG4/+; UAS-Psi/+	R	26	24.5	4
TG4/+; UAS-Psi/+	A	26.5	-8.8	0
TG4/+; UAS-Psi/+	A	26	16.1	5
TG4/+; UAS-Psi/+	A	26.2	10.5	1.5
TG4/+; UAS-Psi/+	A	25.5	12.3	1
TG4/+; UAS-Psi/+	R	25	22.4	3
TG4/+; UAS-Psi/+	A	25.5	16.6	2
TG4/+; UAS-Psi/+	R	26	29.1	4
TG4/+; UAS-Psi/+	A	26.2	0	0.5
TG4/+; UAS-Psi/+	A	25.7	13.3	2.5
TG4/+; UAS-Psi/+	A	25.7	18.6	1.5
TG4/+; UAS-Psi/+	R	26.2	58.4	4.5
TG4/+; UAS-Psi/+	A	25.7	13.8	2.5
TG4/+; UAS-Psi/+	A	12.2	2	0.5
TG4/+; UAS-Psi/+	A	27.7	0.1	0.5
TG4/+; UAS-Psi/+	A	26.2	4.3	0.5
TG4/+; UAS-Psi/+	R	26.2	22	2.5
TG4/+; UAS-Psi/+	A	27.7	3.6	0.5
TG4/+; UAS-Psi/+	A	24.2	0.4	0.5
TG4/+; UAS-Psi/+	A	24.2	7.3	0.5
TG4/+; UAS-Psi/+	A	26.5	14.5	2
TG4/+; UAS-Psi/+	A	31.7	5.1	0.5
TG4/+; UAS-Psi/+	A	26.7	18.9	2.5
TG4/+; UAS-Psi/+	A	26.5	16.2	2
TG4/+; UAS-Psi/+	A	30.7	1.2	0.5
TG4/+; UAS-Psi/+	R	25.6	31.6	4
TG4/+; UAS-Psi/+	A	26.5	-0.2	0
TG4/+; UAS-Psi/+	A	26.7	6.2	0.5
TG4/+; UAS-Psi/+	A	24.5	-1	0
TG4/+; UAS-Psi/+	A	27.4	9.5	1
TG4/+; UAS-Psi/+	A	25.5	9.2	1
TG4/+; UAS-Psi/+	A	25.5	-7.6	0
TG4/+; UAS-Psi/+	A	24.7	3.7	0.5
TG4/+; UAS-Psi/+	A	26.7	0.2	0.5
TG4/+; UAS-Psi/+	R	26	20.2	2
TG4/+; UAS-Psi/+	A	24.5	-4.5	0
TG4/+; UAS-Psi/+	A	10	0.3	0
TG4/+; UAS-Psi/+	A	26	3.4	1
TG4/+; UAS-Psi/+	R	25.7	34.8	2.5
TG4/+; UAS-Psi/+	A	23.2	2	0.5
TG4/+; UAS-Psi/+	A	24.9	19.4	1
TG4/+; UAS-Psi/+	A	26.7	12.7	0.5
TG4/+; UAS-Psi/+	A	24.5	-7.3	0
TG4/+; UAS-Psi/+	A	25	-8.4	0
TG4/+; UAS-Psi/+	A	26.7	1.6	0.5
TG4/+; UAS-Psi/+	A	26.9	5.1	1
TG4/+; UAS-Psi/+	A	25.5	0.1	1
TG4/+; UAS-Psi/+	A	26.5	-3	0
TG4/+; UAS-Psi/+	A	21	-4.1	0
TG4/+; UAS-Psi/+	A	26	-4.7	0
TG4/+; UAS-Psi/+	A	24.7	1	0.5
TG4/+; UAS-Psi/+	A	24.5	-4.2	0
TG4/+; UAS-Psi/+	A	27	-1.4	0
TG4/+; UAS-Psi/+	A	25.7	16.9	1.5
TG4/+; UAS-Psi/+	A	25.5	9.9	1
TG4/+; UAS-Psi/+	A	38	-5	0
TG4/+; UAS-Psi/+	A	27.2	2.1	0.5
TG4/+; UAS-Psi/+	A	24.5	-4.6	0
TG4/+; UAS-Psi/+	A	11	-13.6	0
TG4/+; UAS-Psi/+	A	28	-2	0
TG4/+; UAS-Psi/+	A	26.2	12.9	0.5
TG4/+; UAS-Psi/+	A	26.2	10.6	0.5
TG4/+; UAS-Psi/+	A	24	-1.4	0
TG4/+; UAS-Psi/+	A	12.2	8.5	0.5
TG4/+; UAS-Psi/+	A	24.2	1.8	0.5
TG4/+; UAS-Psi/+	R	26.5	21.4	2
TG4/+; UAS-Psi/+	A	26.7	1.6	0.5
TG4/+; UAS-Psi/+	A	24.7	1.4	0.5
TG4/+; UAS-Psi/+	A	25.7	2.9	0.5
TG4/+; UAS-Psi/+	A	26.7	14.7	0.5
TG4/+; UAS-Psi/+	A	25.7	3.2	0.5
TG4/+; UAS-Psi/+	A	25.5	16.4	2
TG4/+; UAS-Psi/+	R	26.9	24	3
TG4/+; UAS-Psi/+	A	27	10.9	2
TG4/+; UAS-Psi/+	A	26.7	0.1	0.5
TG4/+; UAS-Psi/+	A	25.9	15.1	1
TG4/+; UAS-Psi/+	A	27	-2	0
TG4/+; UAS-Psi/+	A	25.7	10.4	2.5
TG4/+; UAS-Psi/+	A	25	-4.2	0
TG4/+; UAS-Psi/+	R	26.4	41.7	4
TG4/+; UAS-Psi/+	A	25.5	19.4	2
TG4/+; UAS-Psi/+	A	26.2	8	0.5
TG4/+; UAS-Psi/+	A	26.2	14.1	0.5
TG4/+; UAS-Psi/+	A	27.5	-0.4	0
TG4/+; UAS-Psi/+	A	28.7	0	0.5
TG4/+; UAS-Psi/+	A	25.2	5.5	0.5
TG4/+; UAS-Psi/+	A	24.5	-8.9	0
TG4/+; UAS-Psi/+	A	25.7	7.9	0.5
TG4/+; UAS-Psi/+	A	25.7	19.9	1.5
TG4/+; UAS-Psi/+	A	25.7	1.4	0.5
TG4/+; UAS-Psi/+	R	25.7	26.7	1.5
TG4/+; UAS-Psi/+	R	27	22.4	4
TG4/+; UAS-Psi/+	A	27.2	2	0.5
TG4/+; UAS-Psi/+	A	26	-2.6	0
TG4/+; UAS-Psi/+	A	26.5	15.6	1
TG4/+; UAS-Psi/+	A	27	5.7	1
TG4/+; UAS-Psi/+	R	25.5	22.6	2
TG4/+; UAS-Psi/+	A	26.2	15.7	1.5
TG4/+; UAS-Psi/+	A	27.7	5.1	0.5
TG4/+; UAS-Psi/+	A	24.5	7.3	1
TG4/+; UAS-Psi/+	A	26.7	13.5	2.5
TG4/+; UAS-Psi/+	R	25.9	30.6	2
TG4/+; UAS-Psi/+	R	25.2	33.3	2.5
TG4/+; UAS-Psi/+	A	12	-0.7	0
TG4/+; UAS-Psi/+	A	24.7	7.3	0.5
TG4/+; UAS-Psi/+	A	24.2	9.3	0.5
TG4/+; UAS-Psi/+	R	26	20	3
TG4/+; UAS-Psi/+	A	25	-0.7	0
TG4/+; UAS-Psi/+	A	27	-0.9	0
TG4/+; UAS-Psi/+	R	25.3	33.2	2.5
TG4/+; UAS-Psi/+	A	25.5	10.7	1
TG4/+; UAS-Psi/+	A	25.5	-3.1	0
TG4/+; UAS-Psi/+	A	25.5	19.3	1
TG4/+; UAS-Psi/+	A	26.2	17.6	0.5
TG4/+; UAS-Psi/+	A	25.5	-5.9	0
TG4/+; UAS-Psi/+	A	25.5	13.4	1
TG4/+; UAS-Psi/+	A	23.7	3.1	1
TG4/+; UAS-Psi/+	R	25.9	40.3	1
TG4/+; UAS-Psi/+	A	25.5	21.9	1
TG4/+; UAS-Psi/+	R	26.2	34.8	1
TG4/+; UAS-Psi/+	R	26	31.2	1
TG4/+; UAS-Psi/+	A	25.2	1.4	1
TG4/+; UAS-Psi/+	A	26	1.5	1
TG4/+; UAS-Psi/+	A	27.2	1.7	1
TG4/+; UAS-Psi/+	A	23.7	13.2	1
TG4/+; UAS-Psi/+	A	24.2	17.7	1
TG4/+; UAS-Psi/+	A	26.2	8.1	1
TG4/+; UAS-Psi/+	A	26.2	17.7	1
TG4/+; UAS-Psi/+	A	26.2	13.9	1
TG4/+; UAS-Psi/+	R	25.2	22.5	1
TG4/+; UAS-Psi/+	A	26	5.8	1
PG4/+	R	25.1	80.5	3.5
PG4/+	R	25.1	60.7	3.5
PG4/+	R	25.1	50	3.5
PG4/+	R	24.7	62.4	3.5
PG4/+	R	24.9	56.2	3
PG4/+	R	25.3	24.3	2.5
PG4/+	R	24.9	78.5	4
PG4/+	R	25.3	76.2	4
PG4/+	R	24.5	32.5	3
PG4/+	R	25.2	54.3	3.5
PG4/+	R	24.3	82.9	3
PG4/+	R	24.6	79.3	4.5
PG4/+	R	25	65	4
PG4/+	R	25.1	66.8	3.5
PG4/+	R	25.1	66.4	3.5
PG4/+	R	24.9	86	4
PG4/+	A	25	-7.2	0
PG4/+	R	25.1	59.8	2.5
PG4/+	R	24.9	82.2	1
PG4/+	R	25.1	80.2	1
PG4/+	R	25.3	65.8	1
PG4/+	R	25.2	83.2	1
PG4/+	R	25.2	80.4	1
PG4/+	R	25.5	68.3	1
PG4/+	R	25.1	79.3	1
PG4/+	R	25.2	29	1
PG4/+; UAS-Psi/+	R	25.4	63.8	4
PG4/+; UAS-Psi/+	R	24.9	53.2	5
PG4/+; UAS-Psi/+	A	25.5	24.5	1
PG4/+; UAS-Psi/+	R	24.9	73	3
PG4/+; UAS-Psi/+	R	25.4	58.2	4
PG4/+; UAS-Psi/+	A	25.2	16.5	1.5
PG4/+; UAS-Psi/+	R	25.3	33.5	2.5
PG4/+; UAS-Psi/+	R	25.2	40.6	3.5
PG4/+; UAS-Psi/+	R	25.9	55.3	4
PG4/+; UAS-Psi/+	R	25.5	24	4
PG4/+; UAS-Psi/+	A	25.2	1.2	1.5
PG4/+; UAS-Psi/+	R	25.7	59.8	3.5
PG4/+; UAS-Psi/+	A	18.5	-5.3	0
PG4/+; UAS-Psi/+	R	26	36.2	4
PG4/+; UAS-Psi/+	R	25.2	41.4	3.5
PG4/+; UAS-Psi/+	R	24.9	23.6	2
PG4/+; UAS-Psi/+	A	25	16.4	4
PG4/+; UAS-Psi/+	R	24.5	31.3	3
PG4/+; UAS-Psi/+	A	24.5	19.5	3
PG4/+; UAS-Psi/+	R	24.9	56.9	4
PG4/+; UAS-Psi/+	R	24.5	29.3	2
PG4/+; UAS-Psi/+	R	24.9	68.8	4
PG4/+; UAS-Psi/+	R	25.4	67.5	4
PG4/+; UAS-Psi/+	R	24.7	41.2	3.5
PG4/+; UAS-Psi/+	R	25.4	65.8	4
PG4/+; UAS-Psi/+	A	25.2	17	1.5
PG4/+; UAS-Psi/+	R	25	21.8	2
PG4/+; UAS-Psi/+	R	24.9	41.4	3
PG4/+; UAS-Psi/+	R	25	59.1	3
PG4/+; UAS-Psi/+	A	25	-2.8	0
PG4/+; UAS-Psi/+	R	24.9	22	4
PG4/+; UAS-Psi/+	R	25.7	26.6	3.5
PG4/+; UAS-Psi/+	R	25.4	20.8	1
PG4/+; UAS-Psi/+	R	26.2	23.4	1
PG4/+; UAS-Psi/+	R	25.4	52.8	1
PG4/+; UAS-Psi/+	A	24.7	18.9	1
PG4/+; UAS-Psi/+	R	24.5	25.4	1
PG4/+; UAS-Psi/+	R	25.7	24.3	1
PG4/+; UAS-Psi/+	R	25.2	40.2	1
PG4/+; UAS-Psi/+	R	25.4	63.1	1
PG4/+; UAS-Psi/+	R	25	57.2	1
PG4/+; UAS-Psi/+	R	25.4	62.1	1
PG4/+; UAS-Psi/+	R	24.7	33.5	1
PG4/+; UAS-Psi/+	R	25.4	30.5	1
PG4/+; UAS-Psi/+	R	24.6	37.9	1
PG4/+; UAS-Psi/+	R	24.9	60.9	1
PG4/+; UAS-Psi/+	A	24.7	15.8	1
PG4/+; UAS-Psi/+	A	25.5	-1.4	0
TG4/+; PdfGAL80/+	R	24.6	53.6	3.5
TG4/+; PdfGAL80/+	A	21.5	6.3	1
TG4/+; PdfGAL80/+	R	24.9	35.8	3
TG4/+; PdfGAL80/+	R	24.6	73.3	3.5
TG4/+; PdfGAL80/+	R	24.8	23.9	2.5
TG4/+; PdfGAL80/+	R	24.4	58.3	3
TG4/+; PdfGAL80/+	R	24.9	44.4	5
TG4/+; PdfGAL80/+	R	24.8	53.4	3
TG4/+; PdfGAL80/+	R	24.6	47	3.5
TG4/+; PdfGAL80/+	R	24.1	51.5	2.5
TG4/+; PdfGAL80/+	R	24.9	71.6	3
TG4/+; PdfGAL80/+	R	24.5	55.8	5
TG4/+; PdfGAL80/+	R	24.4	35.9	2
TG4/+; PdfGAL80/+	R	24.2	36.4	2.5
TG4/+; PdfGAL80/+	A	25	15	3
TG4/+; PdfGAL80/+	R	24.4	32.3	2
TG4/+; PdfGAL80/+	R	24.7	34	3.5
TG4/+; PdfGAL80/+	R	24.9	21.2	2
TG4/+; PdfGAL80/+	R	24.6	33.7	3.5
TG4/+; PdfGAL80/+	R	24.4	34.3	2
TG4/+; PdfGAL80/+	R	24.5	29	3
TG4/+; PdfGAL80/+	R	25.1	37.1	3.5
TG4/+; PdfGAL80/+	R	24.4	56.9	3
TG4/+; PdfGAL80/+	R	25	33.5	4
TG4/+; PdfGAL80/+	R	24.6	55.8	3.5
TG4/+; PdfGAL80/+	R	23.3	23.8	2.5
TG4/+; PdfGAL80/+	R	25	22.2	4
TG4/+; PdfGAL80/+	A	26.5	-5.3	0
TG4/+; PdfGAL80/+	A	24.5	13.3	2
TG4/+; PdfGAL80/+	R	24.2	31.8	2.5
TG4/+; PdfGAL80/+	R	24.2	32.7	2.5
TG4/+; PdfGAL80/+	R	24.2	72.5	3.5
TG4/+; PdfGAL80/+	R	24.7	50.8	3.5
TG4/+; PdfGAL80/+	R	24.7	22.9	2.5
TG4/+; PdfGAL80/+	R	24.6	62.7	4.5
TG4/+; PdfGAL80/+	A	24.5	19.6	2
TG4/+; PdfGAL80/+	A	24	8	1
TG4/+; PdfGAL80/UAS-Psi	A	26.2	13.2	2.5
TG4/+; PdfGAL80/UAS-Psi	A	25.5	18.2	1
TG4/+; PdfGAL80/UAS-Psi	R	26.7	21.2	1.5
TG4/+; PdfGAL80/UAS-Psi	A	24.5	16.5	2
TG4/+; PdfGAL80/UAS-Psi	A	24.7	14	1.5
TG4/+; PdfGAL80/UAS-Psi	A	24.2	5.4	0.5
TG4/+; PdfGAL80/UAS-Psi	A	30.5	-9	0
TG4/+; PdfGAL80/UAS-Psi	A	25.2	12.5	1.5
TG4/+; PdfGAL80/UAS-Psi	A	13.5	-3.2	0
TG4/+; PdfGAL80/UAS-Psi	A	24.9	36.2	1
TG4/+; PdfGAL80/UAS-Psi	A	20.5	-8	0
TG4/+; PdfGAL80/UAS-Psi	A	25.5	-13.3	0
TG4/+; PdfGAL80/UAS-Psi	A	24.2	8.7	2.5
TG4/+; PdfGAL80/UAS-Psi	A	25.2	2.7	0.5
TG4/+; PdfGAL80/UAS-Psi	A	26	-2.4	0
TG4/+; PdfGAL80/UAS-Psi	A	28.2	2.4	0.5
TG4/+; PdfGAL80/UAS-Psi	A	25.5	4.6	1
TG4/+; PdfGAL80/UAS-Psi	A	24	-7.1	0
TG4/+; PdfGAL80/UAS-Psi	A	28.5	-7.5	0
TG4/+; PdfGAL80/UAS-Psi	A	25.7	1.9	1.5
TG4/+; PdfGAL80/UAS-Psi	R	24.5	29.7	3
TG4/+; PdfGAL80/UAS-Psi	A	17.5	-10.6	0
TG4/+; PdfGAL80/UAS-Psi	A	25.2	8.6	0.5
TG4/+; PdfGAL80/UAS-Psi	A	13.7	1.2	0.5
TG4/+; PdfGAL80/UAS-Psi	A	34.7	5.7	0.5
TG4/+; PdfGAL80/UAS-Psi	A	24	-9.2	0
TG4/+; PdfGAL80/UAS-Psi	R	25	31	3
TG4/+; PdfGAL80/UAS-Psi	A	13	-5.6	0
TG4/+; PdfGAL80/UAS-Psi	A	32	-3.2	0
TG4/+; PdfGAL80/UAS-Psi	A	24.2	4	0.5
TG4/+; PdfGAL80/UAS-Psi	A	23.7	2.5	0.5
TG4/+; PdfGAL80/UAS-Psi	A	24	-10.1	0
TG4/+; PdfGAL80/UAS-Psi	A	27	-9.8	0
TG4/+; PdfGAL80/UAS-Psi	A	26	11.8	1
TG4/+; PdfGAL80/UAS-Psi	A	28.2	6.7	0.5
TG4/+; PdfGAL80/UAS-Psi	A	24.2	1.1	0.5
TG4/+; PdfGAL80/UAS-Psi	A	23	-1.8	0
TG4/+; PdfGAL80/UAS-Psi	A	23.7	6.2	0.5
TG4/+; PdfGAL80/UAS-Psi	A	25.2	4.7	0.5
TG4/+; PdfGAL80/UAS-Psi	A	15.5	-0.5	0
TG4/+; PdfGAL80/UAS-Psi	A	24.7	8.2	0.5
TG4/+; PdfGAL80/UAS-Psi	A	25.2	4.4	0.5
TG4/+; PdfGAL80/UAS-Psi	A	23.5	-4.9	0
TG4/+; PdfGAL80/UAS-Psi	A	24.7	6.5	0.5
TG4/+; PdfGAL80/UAS-Psi	A	25.3	14.9	3.5
TG4/+; PdfGAL80/UAS-Psi	A	24.5	3.4	1
TG4/+; PdfGAL80/UAS-Psi	A	12.1	2.3	0.5
TG4/+; PdfGAL80/UAS-Psi	A	24.2	6	0.5
TG4/+; PdfGAL80/UAS-Psi	A	10	-12.1	0
TG4/+; PdfGAL80/UAS-Psi	A	10.6	3.7	0.5
TG4/+; PdfGAL80/UAS-Psi	R	24.9	26.3	3
TG4/+; PdfGAL80/UAS-Psi	R	24.7	30	2.5
TG4/+; PdfGAL80/UAS-Psi	R	25.2	24.7	1.5
TG4/+; PdfGAL80/UAS-Psi	A	12.4	4.8	1
TG4/+; PdfGAL80/UAS-Psi	A	25	-5.1	0
TG4/+; PdfGAL80/UAS-Psi	A	23.2	8.9	0.5
TG4/+; PdfGAL80/UAS-Psi	A	24.2	7.8	0.5
TG4/+; PdfGAL80/UAS-Psi	R	12.1	57.5	1.5
TG4/+; PdfGAL80/UAS-Psi	A	24.5	-1.7	0
TG4/+; PdfGAL80/UAS-Psi	A	23.2	6	0.5
TG4/+; PdfGAL80/UAS-Psi	A	24	-4.7	0
TG4/+; PdfGAL80/UAS-Psi	A	24.7	10.9	1.5
TG4/+; PdfGAL80/UAS-Psi	R	24.7	26.5	1.5
TG4/+; PdfGAL80/UAS-Psi	A	29.7	0.2	0.5
TG4/+; PdfGAL80/UAS-Psi	A	24.2	19.9	0.5
TG4/+; PdfGAL80/UAS-Psi	A	24.2	0.8	0.5
TG4/+; PdfGAL80/UAS-Psi	A	25.2	14.9	1.5
TG4/+; PdfGAL80/UAS-Psi	A	24.2	0.7	0.5
TG4/+; PdfGAL80/UAS-Psi	A	24	12	1
TG4/+; PdfGAL80/UAS-Psi	A	11.7	4.6	0.5
TG4/+; PdfGAL80/UAS-Psi	A	23.5	-6.8	0
TG4/+; PdfGAL80/UAS-Psi	A	22.2	1.7	0.5
TG4/+; PdfGAL80/UAS-Psi	A	25.5	10	3
TG4/+; PdfGAL80/UAS-Psi	A	24.5	20.5	1
TG4/+; PdfGAL80/UAS-Psi	A	36.7	0.8	0.5
TG4/+; PdfGAL80/UAS-Psi	A	25	-2.8	0
TG4/+; PdfGAL80/UAS-Psi	A	25.2	9.3	1.5
TG4/+; PdfGAL80/UAS-Psi	A	24.7	13.9	2.5
TG4/+; PdfGAL80/UAS-Psi	A	25.2	2.6	0.5
TG4/+; PdfGAL80/UAS-Psi	A	23.7	9.6	0.5
TG4/+; PdfGAL80/UAS-Psi	A	24.5	15.9	2
TG4/+; PdfGAL80/UAS-Psi	A	23.7	1.7	0.5
TG4/+; PdfGAL80/UAS-Psi	A	24	8.1	1
TG4/+; PdfGAL80/UAS-Psi	A	24.7	17.9	2.5
TG4/+; PdfGAL80/UAS-Psi	A	24.7	19.8	0.5
TG4/+; PdfGAL80/UAS-Psi	A	24.2	8.4	1.5
TG4/+; PdfGAL80/UAS-Psi	A	24.7	2.4	0.5
TG4/+; PdfGAL80/UAS-Psi	A	24	25.4	1
TG4/+; PdfGAL80/UAS-Psi	A	25.5	-3.1	0
TG4/+; PdfGAL80/UAS-Psi	A	24.7	0.8	0.5
TG4/+; PdfGAL80/UAS-Psi	A	25.5	-7.3	0
TG4/+; PdfGAL80/UAS-Psi	A	23	-10.4	0
TG4/+; PdfGAL80/UAS-Psi	R	25.1	43.7	3.5
TG4/+; PdfGAL80/UAS-Psi	A	24.4	10.8	2
TG4/+; PdfGAL80/UAS-Psi	A	24.3	18.6	2.5
TG4/+; PdfGAL80/UAS-Psi	A	25.2	18.1	2.5
TG4/+; PdfGAL80/UAS-Psi	A	12.7	8.7	0.5
TG4/+; PdfGAL80/UAS-Psi	A	24.7	2.6	0.5
TG4/+; PdfGAL80/UAS-Psi	A	12.5	-2.1	0
TG4/+; PdfGAL80/UAS-Psi	A	24.2	9.2	0.5
TG4/+; PdfGAL80/UAS-Psi	A	26.2	2.5	0.5
TG4/+; PdfGAL80/UAS-Psi	R	25	25.2	3
TG4/+; PdfGAL80/UAS-Psi	A	24.5	5.4	1
TG4/+; PdfGAL80/UAS-Psi	A	25	4.5	1
TG4/+; PdfGAL80/UAS-Psi	A	33.7	6.5	0.5
TG4/+; PdfGAL80/UAS-Psi	A	24.2	1.1	0.5
TG4/+; PdfGAL80/UAS-Psi	R	23.7	25.9	1.5
TG4/+; PdfGAL80/UAS-Psi	R	25	40.1	4
TG4/+; PdfGAL80/UAS-Psi	A	24.7	9.6	1.5
TG4/+; PdfGAL80/UAS-Psi	A	25	-0.7	0
TG4/+; PdfGAL80/UAS-Psi	A	25	-3.5	0
TG4/+; PdfGAL80/UAS-Psi	A	24.7	13.7	2.5
TG4/+; PdfGAL80/UAS-Psi	A	25.2	5.1	0.5
TG4/+; PdfGAL80/UAS-Psi	A	18	-2.4	0
TG4/+; PdfGAL80/UAS-Psi	A	12.2	11.2	0.5
TG4/+; PdfGAL80/UAS-Psi	R	24.7	25.2	3.5
