# Supplementary material for: Drosophila PSI controls circadian period and the phase of circadian behavior under temperature cycle via tim splicing
Source: eLife journal article supplement (doi:10.7554/elife.50063), 2019-11-08
Supplement: supp [file elife-50063-supp-v1.zip › elife_poa_e50063_Figure_2_source_data_2.xlsx]

## Sheet: Figure 2
Figure 2C left panel
	w1118	TD2/PsiRNAiGD	TD2/PsiRNAiKK	TD2/+	PsiRNAiGD/+	PsiRNAiKK/+
Mean	24.06	23.72	23.65	24.8	24.21	24.02
SEM	0.03426	0.06867	0.06233	0.03598	0.03694	0.03847
Number of rhythmic flies	69	38	27	58	59	53
One-way ANOVA followed by:
Tukey's multiple comparisons test	Mean Diff.	95.00% CI of diff.	Significant?	Summary	Adjusted P Value
TD2/+ vs. TD2/PsiRNAiGD	1.084	0.9011 to 1.267	Yes	****	<0.0001
TD2/+ vs. TD2/PsiRNAiKK	1.152	0.9474 to 1.356	Yes	****	<0.0001
TD2/+ vs. PsiRNAiGD/+	0.5949	0.4327 to 0.7572	Yes	****	<0.0001
TD2/+ vs. PsiRNAiKK/+	0.7755	0.6087 to 0.9422	Yes	****	<0.0001
TD2/+ vs. w1118	0.742	0.5857 to 0.8984	Yes	****	<0.0001
TD2/PsiRNAiGD vs. TD2/PsiRNAiKK	0.06764	-0.1532 to 0.2885	No	ns	0.9514
TD2/PsiRNAiGD vs. PsiRNAiGD/+	-0.4893	-0.6718 to -0.3068	Yes	****	<0.0001
TD2/PsiRNAiGD vs. PsiRNAiKK/+	-0.3087	-0.4953 to -0.1222	Yes	****	<0.0001
TD2/PsiRNAiGD vs. w1118	-0.3422	-0.5195 to -0.1649	Yes	****	<0.0001
TD2/PsiRNAiKK vs. PsiRNAiGD/+	-0.5569	-0.7608 to -0.353	Yes	****	<0.0001
TD2/PsiRNAiKK vs. PsiRNAiKK/+	-0.3764	-0.5839 to -0.1689	Yes	****	<0.0001
TD2/PsiRNAiKK vs. w1118	-0.4098	-0.609 to -0.2106	Yes	****	<0.0001
PsiRNAiGD/+ vs. PsiRNAiKK/+	0.1806	0.01448 to 0.3466	Yes	*	0.0242
PsiRNAiGD/+ vs. w1118	0.1471	-0.008492 to 0.3027	No	ns	0.0759
PsiRNAiKK/+ vs. w1118	-0.03344	-0.1937 to 0.1268	No	ns	0.9911
Figure 2C right panel
	TD2/+	PsiRNAiGD/+	TD2/PsiRNAiGD	PsiRNAiKK/+	TD2/PsiRNAiKK
Mean	23.65	23.62	23.06	23.53	22.84
SEM	0.06517	0.03932	0.1298	0.03113	0.1522
Number of rhythmic flies	34	24	17	28	17
One-way ANOVA followed by:
Tukey's multiple comparisons test	Mean Diff.	95.00% CI of diff.	Significant?	Summary	Adjusted P Value
TD2/PsiRNAiGD vs. TD2/+	-0.5941	-0.9128 to -0.2754	Yes	****	<0.0001
TD2/PsiRNAiGD vs. PsiRNAiGD/+	-0.5578	-0.8979 to -0.2177	Yes	***	0.0001
TD2/PsiRNAiKK vs. TD2/+	-0.8118	-1.13 to -0.4931	Yes	****	<0.0001
TD2/PsiRNAiKK vs. PsiRNAiKK/+	-0.6838	-1.014 to -0.3539	Yes	****	<0.0001
TD2/+ vs. PsiRNAiGD/+	0.03627	-0.2498 to 0.3223	No	ns	0.9967
TD2/+ vs. PsiRNAiKK/+	0.1279	-0.1459 to 0.4017	No	ns	0.6948
PsiRNAiGD/+ vs. PsiRNAiKK/+	0.09167	-0.2068 to 0.3901	No	ns	0.9138
TD2/PsiRNAiGD vs. TD2/PsiRNAiKK	0.2176	-0.1503 to 0.5856	No	ns	0.4757
TD2/PsiRNAiGD vs. PsiRNAiKK/+	-0.4662	-0.7961 to -0.1363	Yes	**	0.0014
TD2/PsiRNAiKK vs. PsiRNAiGD/+	-0.7755	-1.116 to -0.4354	Yes	****	<0.0001
Figure 2D
	PD2/+	PD2/PsiRNAiGD	PD2/PsiRNAiKK
Mean	24.85	24.19	24.66
SEM	0.04021	0.06172	0.05844
Number of rhythmic flies	64	27	42
One-way ANOVA followed by:
Dunnett's multiple comparisons test	Mean Diff.	95.00% CI of diff.	Significant?	Summary	Adjusted P Value
PD2/+ vs. PD2/PsiRNAiGD	0.6664	0.4916 to 0.8411	Yes	****	0.0001
PD2/+ vs. PD2/PsiRNAiKK	0.192	0.0408 to 0.3433	Yes	*	0.01
Figure 2E
	TD2/+; PdfGAL80/+	TD2/PsiRNAiGD; PdfGAL80/+	TD2/PsiRNAiKK; PdfGAL80/+
Mean	24.46	23.78	24.01
SEM	0.06721	0.1744	0.05312
Number of rhythmic flies	30	12	37
One-way ANOVA followed by:
Dunnett's multiple comparisons test	Mean Diff.	95.00% CI of diff.	Significant?	Summary	Adjusted P Value
TD2/+; PdfGAL80/+ vs. TD2/PsiRNAiGD; PdfGAL80/+	0.68	0.3779 to 0.9821	Yes	****	0.0001
TD2/+; PdfGAL80/+ vs. TD2/PsiRNAiKK; PdfGAL80/+	0.4579	0.2406 to 0.6753	Yes	****	0.0001
Figure 2F left panel
	UAS-Psi/+	TG4/+	TG4/+; UAS-Psi/+
Mean	24.21	25.23	25.87
SEM	0.0371	0.05051	0.06888
Number of rhythmic flies	63	60	49
One-way ANOVA followed by:
Tukey's multiple comparisons test	Mean Diff.	95.00% CI of diff.	Significant?	Summary	Adjusted P Value
TG4/+; UAS-Psi/+ vs. TG4/+	0.6464	0.4693 to 0.8235	Yes	****	<0.0001
TG4/+; UAS-Psi/+ vs. UAS-Psi/+	1.665	1.49 to 1.84	Yes	****	<0.0001
TG4/+ vs. UAS-Psi/+	1.019	0.8527 to 1.185	Yes	****	<0.0001
Figure 2G left panel
	UAS-Psi/+	PG4/+	PG4/+; UAS-Psi/+
Mean	24.21	25.03	25.19
SEM	0.0371	0.05432	0.06987
Number of rhythmic flies	63	25	37
One-way ANOVA followed by:
Tukey's multiple comparisons test	Mean Diff.	95.00% CI of diff.	Significant?	Summary	Adjusted P Value
PG4/+; UAS-Psi/+ vs. PG4/+	0.1585	-0.04699 to 0.364	No	ns	0.1641
PG4/+; UAS-Psi/+ vs. UAS-Psi/+	0.9801	0.8157 to 1.145	Yes	****	<0.0001
PG4/+ vs. UAS-Psi/+	0.8217	0.634 to 1.009	Yes	****	<0.0001
Figure 2H left panel
	UAS-Psi/+	TG4/+; PdfGAL80/+	TG4/+; PdfGAL80/UAS-Psi
Mean	24.21	24.55	24.88
SEM	0.0371	0.06373	0.1895
Number of rhythmic flies	63	31	13
One-way ANOVA followed by:
Tukey's multiple comparisons test	Mean Diff.	95.00% CI of diff.	Significant?	Summary	Adjusted P Value
TG4/+; PdfGAL80/UAS-Psi vs. TG4/+; PdfGAL80/+	0.3221	0.02613 to 0.618	Yes	*	0.0295
TG4/+; PdfGAL80/UAS-Psi vs. UAS-Psi/+	0.6706	0.3977 to 0.9434	Yes	****	<0.0001
TG4/+; PdfGAL80/+ vs. UAS-Psi/+	0.3485	0.152 to 0.545	Yes	***	0.0002
