# Supplementary material for: Drosophila PSI controls circadian period and the phase of circadian behavior under temperature cycle via tim splicing
Source: eLife journal article supplement (doi:10.7554/elife.50063), 2019-11-08
Supplement: supp [file elife-50063-supp-v1.zip › elife_poa_e50063_Figure_3_figure_supplement_1_source_data_1.xlsx]

## Sheet: Figure 3-S1
cwo-RA
		cwo-RA Relative expression (AU): Values are normalized to the average of all PsiRNAiKK/TD2 timepoints
Time point	Genotype	Experiment 1	Experiment 2	Experiment 3	Experiment 4	Experiment 5	Experiment 6	Average	SEM
CT3	TD2/+				1.20855	1.32235	0.945496	1.1588	0.111597
CT9					2.32493	2.37212	1.53172	2.07626	0.272611
CT15					2.47123	2.1374	1.41658	2.00841	0.31121
CT21					1.62986	1.39081	1.21271	1.41113	0.12085
CT3	RNAi/+	0.482417	0.671576	0.838317	1.27063			0.815734	0.168156
CT9		1.64887	1.45412	1.3773	2.1781			1.6646	0.180456
CT15		1.25888	1.33652	1.46775	1.97114			1.50857	0.160101
CT21		1.11271	0.999611	0.998666	1.40024			1.12781	0.0946755
CT3	RNAi/TD2	0.776576	0.818447	0.749573	0.978582	0.850164	0.943898	0.852874	0.0373153
CT9		1.13605	1.05718	1.1308	1.21263	1.21367	1.01822	1.12809	0.0324763
CT15		1.20286	1.26075	1.24586	1.13456	1.11801	1.38087	1.22382	0.0392074
CT21		0.88452	0.863623	0.873766	0.674228	0.818154	0.657012	0.795217	0.0420672
cwo-RB
		cwo-RB Relative expression (AU): Values are normalized to the average of all PsiRNAiKK/TD2 timepoints
Time point	Genotype	Experiment 1	Experiment 2	Experiment 3	Experiment 4	Experiment 5	Experiment 6	Average	SEM
CT3	TD2/+				1.09053	1.23779	0.995895	1.10807	0.0703777
CT9					2.17017	2.0702	1.37193	1.87077	0.251084
CT15					2.10668	1.81713	1.4535	1.79244	0.188961
CT21					1.47313	1.60972	1.06609	1.38298	0.163278
CT3	RNAi/+	0.362585	0.610989	0.839324	1.04998			0.715721	0.147954
CT9		1.56163	1.44205	1.55089	1.63224			1.5467	0.0392736
CT15		1.22523	1.33816	1.65211	1.76697			1.49562	0.12781
CT21		0.961299	1.12569	1.024	1.13963			1.06266	0.0424917
CT3	RNAi/TD2	0.905251	0.800997	0.865858	0.957611	0.837048	0.932604	0.883228	0.024257
CT9		1.10936	1.07539	1.08573	1.13218	1.26409	1.11989	1.13111	0.0279571
CT15		1.18077	1.24186	1.14113	1.18477	1.08795	1.25071	1.1812	0.025049
CT21		0.804626	0.881757	0.907277	0.725436	0.810908	0.6968	0.804467	0.0338739
cwo-RC
		cwo-RC Relative expression (AU): Values are normalized to the average of all PsiRNAiKK/TD2 timepoints
Time point	Genotype	Experiment 1	Experiment 2	Experiment 3	Experiment 4	Experiment 5	Experiment 6	Average	SEM
CT3	TD2/+				0.617887	0.590822	0.618911	0.609207	0.00919723
CT9					0.926808	1.10174	0.828775	0.952442	0.0798344
CT15					0.912401	1.11526	0.900252	0.975972	0.0697334
CT21					0.623977	0.793049	0.824994	0.74734	0.062367
CT3	RNAi/+	0.771063	0.524699	0.598618	0.592221			0.62165	0.0525359
CT9		1.01772	0.982142	0.864012	0.982435			0.961577	0.0335767
CT15		1.13649	1.02089	0.918146	0.925081			1.00015	0.0511373
CT21		0.700083	0.726289	0.700021	0.682154			0.702137	0.00908916
CT3	RNAi/TD2	0.635211	0.704987	0.702576	0.800356	0.716045	0.878201	0.739563	0.0350819
CT9		1.02401	1.08282	1.04635	1.03635	1.19056	1.11079	1.08181	0.0253864
CT15		1.28303	1.22196	1.29918	1.26032	1.18488	1.33434	1.26395	0.0220512
CT21		1.05775	0.990225	0.951898	0.902975	0.908506	0.676662	0.914669	0.0530374
cwo-total
		cwo-total Relative expression (AU): Values are normalized to the average of all PsiRNAiKK/TD2 timepoints
Time point	Genotype	Experiment 1	Experiment 2	Experiment 3	Experiment 4	Experiment 5	Experiment 6	Average	SEM
CT3	TD2/+				0.948889	0.952949	1.39552	1.09912	0.148205
CT9					1.97662	1.87226	1.85321	1.9007	0.0383595
CT15					2.19784	1.69789	2.11854	2.00476	0.15513
CT21					1.40332	1.35202	1.63025	1.46187	0.0854855
CT3	RNAi/+	0.541618	0.689509	0.737417	1.10745			0.768999	0.120267
CT9		1.43243	1.60452	1.43683	2.14707			1.65521	0.168774
CT15		1.55993	1.60109	1.57822	2.05174			1.69774	0.118299
CT21		1.03058	1.08737	1.03487	1.32524			1.11952	0.0697806
CT3	RNAi/TD2	0.567259	0.669549	0.732694	0.800529	0.790894	0.516066	0.679498	0.0480604
CT9		1.11572	1.1987	1.0976	1.20052	1.17983	1.04056	1.13882	0.0264332
CT15		1.36607	1.26582	1.29947	1.19059	1.13504	1.15602	1.2355	0.0367363
CT21		0.950948	0.865937	0.870241	0.808358	0.894239	1.28736	0.94618	0.0707865
