# Supplementary material for: Drosophila PSI controls circadian period and the phase of circadian behavior under temperature cycle via tim splicing
Source: eLife journal article supplement (doi:10.7554/elife.50063), 2019-11-08
Supplement: supp [file elife-50063-supp-v1.zip › elife_poa_e50063_Figure_3_figure_supplement_1_source_data_2.xlsx]

## Sheet: Figure 3-S1
Figure 3-S1B
	TD2/+			PsiRNAiKK/+			TD2/PsiRNAiKK
	Mean	SEM	N (runs)	Mean	SEM	N (runs)	Mean	SEM	N (runs)
CT 3	1.1588	0.111597	3	0.815734	0.168156	4	0.852874	0.0373153	6
CT 9	2.07626	0.272611	3	1.6646	0.180456	4	1.12809	0.0324763	6
CT 15	2.00841	0.31121	3	1.50857	0.160101	4	1.22382	0.0392074	6
CT 21	1.41113	0.12085	3	1.12781	0.0946755	4	0.795217	0.0420672	6
Two-way ANOVA followed by:
Tukey's multiple comparisons test	Mean Diff.	95.00% CI of diff.	Significant?	Summary	Adjusted P Value
CT 3
TD2/+ vs. PsiRNAiKK/+	0.3431	-0.32 to 1.006	No	ns	0.8115
TD2/+ vs. TD2/PsiRNAiKK	0.3059	-0.3079 to 0.9198	No	ns	0.8446
PsiRNAiKK/+ vs. TD2/PsiRNAiKK	-0.03714	-0.5975 to 0.5233	No	ns	>0.9999
CT 9
TD2/+ vs. PsiRNAiKK/+	0.4117	-0.2514 to 1.075	No	ns	0.5905
TD2/+ vs. TD2/PsiRNAiKK	0.9482	0.3343 to 1.562	Yes	***	0.0002
PsiRNAiKK/+ vs. TD2/PsiRNAiKK	0.5365	-0.02388 to 1.097	No	ns	0.0715
CT 15
TD2/+ vs. PsiRNAiKK/+	0.4998	-0.1632 to 1.163	No	ns	0.306
TD2/+ vs. TD2/PsiRNAiKK	0.7846	0.1707 to 1.398	Yes	**	0.0036
PsiRNAiKK/+ vs. TD2/PsiRNAiKK	0.2848	-0.2756 to 0.8451	No	ns	0.828
CT 21
TD2/+ vs. PsiRNAiKK/+	0.2833	-0.3797 to 0.9464	No	ns	0.9371
TD2/+ vs. TD2/PsiRNAiKK	0.6159	0.002033 to 1.23	Yes	*	0.0486
PsiRNAiKK/+ vs. TD2/PsiRNAiKK	0.3326	-0.2278 to 0.893	No	ns	0.6532
Figure 3-S1C
	TD2/+			PsiRNAiKK/+			TD2/PsiRNAiKK
	Mean	SEM	N (runs)	Mean	SEM	N (runs)	Mean	SEM	N (runs)
CT 3	1.10807	0.0703777	3	0.715721	0.147954	4	0.883228	0.024257	6
CT 9	1.87077	0.251084	3	1.5467	0.0392736	4	1.13111	0.0279571	6
CT 15	1.79244	0.188961	3	1.49562	0.12781	4	1.1812	0.025049	6
CT 21	1.38298	0.163278	3	1.06266	0.0424917	4	0.804467	0.0338739	6
Two-way ANOVA followed by:
Tukey's multiple comparisons test	Mean Diff.	95.00% CI of diff.	Significant?	Summary	Adjusted P Value
CT 3
TD2/+ vs. PsiRNAiKK/+	0.3924	-0.09875 to 0.8835	No	ns	0.2312
TD2/+ vs. TD2/PsiRNAiKK	0.2248	-0.2298 to 0.6795	No	ns	0.8509
PsiRNAiKK/+ vs. TD2/PsiRNAiKK	-0.1675	-0.5826 to 0.2476	No	ns	0.9569
CT 9
TD2/+ vs. PsiRNAiKK/+	0.3241	-0.167 to 0.8152	No	ns	0.5007
TD2/+ vs. TD2/PsiRNAiKK	0.7397	0.285 to 1.194	Yes	****	<0.0001
PsiRNAiKK/+ vs. TD2/PsiRNAiKK	0.4156	0.0005385 to 0.8307	Yes	*	0.0494
CT 15
TD2/+ vs. PsiRNAiKK/+	0.2968	-0.1943 to 0.7879	No	ns	0.6284
TD2/+ vs. TD2/PsiRNAiKK	0.6112	0.1566 to 1.066	Yes	**	0.0018
PsiRNAiKK/+ vs. TD2/PsiRNAiKK	0.3144	-0.1006 to 0.7295	No	ns	0.2993
CT 21
TD2/+ vs. PsiRNAiKK/+	0.3203	-0.1708 to 0.8114	No	ns	0.5181
TD2/+ vs. TD2/PsiRNAiKK	0.5785	0.1238 to 1.033	Yes	**	0.0038
PsiRNAiKK/+ vs. TD2/PsiRNAiKK	0.2582	-0.1569 to 0.6732	No	ns	0.5877
Figure 3-S1D
	TD2/+			PsiRNAiKK/+			TD2/PsiRNAiKK
	Mean	SEM	N (runs)	Mean	SEM	N (runs)	Mean	SEM	N (runs)
CT 3	0.609207	0.00919723	3	0.62165	0.0525359	4	0.739563	0.0350819	6
CT 9	0.952442	0.0798344	3	0.961577	0.0335767	4	1.08181	0.0253864	6
CT 15	0.975972	0.0697334	3	1.00015	0.0511373	4	1.26395	0.0220512	6
CT 21	0.74734	0.062367	3	0.702137	0.00908916	4	0.914669	0.0530374	6
Two-way ANOVA followed by:
Tukey's multiple comparisons test	Mean Diff.	95.00% CI of diff.	Significant?	Summary	Adjusted P Value
CT 3
TD2/+ vs. PsiRNAiKK/+	-0.01244	-0.2514 to 0.2265	No	ns	>0.9999
TD2/+ vs. TD2/PsiRNAiKK	-0.1304	-0.3515 to 0.09084	No	ns	0.6626
PsiRNAiKK/+ vs. TD2/PsiRNAiKK	-0.1179	-0.3198 to 0.08401	No	ns	0.6747
CT 9
TD2/+ vs. PsiRNAiKK/+	-0.009135	-0.2481 to 0.2298	No	ns	>0.9999
TD2/+ vs. TD2/PsiRNAiKK	-0.1294	-0.3506 to 0.09182	No	ns	0.6726
PsiRNAiKK/+ vs. TD2/PsiRNAiKK	-0.1202	-0.3222 to 0.08168	No	ns	0.6487
CT 15
TD2/+ vs. PsiRNAiKK/+	-0.02418	-0.2631 to 0.2147	No	ns	>0.9999
TD2/+ vs. TD2/PsiRNAiKK	-0.288	-0.5092 to -0.06679	Yes	**	0.0028
PsiRNAiKK/+ vs. TD2/PsiRNAiKK	-0.2638	-0.4657 to -0.06188	Yes	**	0.0027
CT 21
TD2/+ vs. PsiRNAiKK/+	0.0452	-0.1937 to 0.2841	No	ns	>0.9999
TD2/+ vs. TD2/PsiRNAiKK	-0.1673	-0.3885 to 0.05386	No	ns	0.3012
PsiRNAiKK/+ vs. TD2/PsiRNAiKK	-0.2125	-0.4145 to -0.01061	Yes	*	0.0315
Figure 3-S1E
	TD2/+			PsiRNAiKK/+			TD2/PsiRNAiKK
	Mean	SEM	N (runs)	Mean	SEM	N (runs)	Mean	SEM	N (runs)
CT 3	1.09912	0.148205	3	0.768999	0.120267	4	0.679498	0.0480604	6
CT 9	1.9007	0.0383595	3	1.65521	0.168774	4	1.13882	0.0264332	6
CT 15	2.00476	0.15513	3	1.69774	0.118299	4	1.2355	0.0367363	6
CT 21	1.46187	0.0854855	3	1.11952	0.0697806	4	0.94618	0.0707865	6
Two-way ANOVA followed by:
Tukey's multiple comparisons test	Mean Diff.	95.00% CI of diff.	Significant?	Summary	Adjusted P Value
CT 3
TD2/+ vs. PsiRNAiKK/+	0.3301	-0.1567 to 0.817	No	ns	0.4599
TD2/+ vs. TD2/PsiRNAiKK	0.4196	-0.03111 to 0.8704	No	ns	0.0885
PsiRNAiKK/+ vs. TD2/PsiRNAiKK	0.0895	-0.322 to 0.501	No	ns	0.9998
CT 9
TD2/+ vs. PsiRNAiKK/+	0.2455	-0.2414 to 0.7323	No	ns	0.8348
TD2/+ vs. TD2/PsiRNAiKK	0.7619	0.3111 to 1.213	Yes	****	<0.0001
PsiRNAiKK/+ vs. TD2/PsiRNAiKK	0.5164	0.1049 to 0.9279	Yes	**	0.0045
CT 15
TD2/+ vs. PsiRNAiKK/+	0.307	-0.1798 to 0.7939	No	ns	0.5679
TD2/+ vs. TD2/PsiRNAiKK	0.7693	0.3185 to 1.22	Yes	****	<0.0001
PsiRNAiKK/+ vs. TD2/PsiRNAiKK	0.4622	0.05078 to 0.8737	Yes	*	0.0164
CT 21
TD2/+ vs. PsiRNAiKK/+	0.3424	-0.1445 to 0.8292	No	ns	0.4055
TD2/+ vs. TD2/PsiRNAiKK	0.5157	0.06495 to 0.9664	Yes	*	0.0135
PsiRNAiKK/+ vs. TD2/PsiRNAiKK	0.1733	-0.2381 to 0.5848	No	ns	0.9426
