# Supplementary material for: Drosophila PSI controls circadian period and the phase of circadian behavior under temperature cycle via tim splicing
Source: eLife journal article supplement (doi:10.7554/elife.50063), 2019-11-08
Supplement: supp [file elife-50063-supp-v1.zip › elife_poa_e50063_Figure_3_figure_supplement_2_source_data_1.xlsx]

## Sheet: Figure 3-S2
Morning 20°C
	TD2/PsiRNAiKK	TD2/PsiRNAiGD	TD2/+
	55.283	59.2365	56.5713
	79.8196	69.6312	61.0361
	68.7987	58.4408	60.5389
Average	67.9671	62.4362	59.3821
SEM	7.0953	3.60483	1.4127
Evening 20°C
	TD2/PsiRNAiKK	TD2/PsiRNAiGD	TD2/+
	68.8065	59.9798	64.262
	69.6355	64.4715	68.377
	66.4131	60.2873	67.7564
Average	68.285	61.5795	66.7985
SEM	0.966069	1.4487	1.28082
Morning 25°C
	TD2/PsiRNAiKK	TD2/PsiRNAiGD	TD2/+
		61.0049	52.8965
		78.4333
		70.2935	57.0011
	62.6188	59.7043	59.0593
	78.3085		75.4168
	78.0553		59.2856
Average	72.9942	67.359	60.7319
SEM	5.18822	4.38007	3.8461
Evening 25°C
	TD2/PsiRNAiKK	TD2/PsiRNAiGD	TD2/+
		69.9425	76.829
		65.6969
		75.7443	75.656
	90.0874	73.3997	77.8444
	76.6564		81.5074
	73.4921		70.0405
Average	80.0787	71.1958	76.3755
SEM	5.08708	2.18623	1.86211
Morning 30°C
	TD2/PsiRNAiKK	TD2/PsiRNAiGD	TD2/+
	58.1128	60.185	58.2143
	58.9348	57.7839	62.5057
	58.7253	59.9422	61.1713
Average	58.591	59.3037	60.6304
SEM	0.246606	0.763141	1.26798
Evening 30°C
	TD2/PsiRNAiKK	TD2/PsiRNAiGD	TD2/+
	88.0637	93.3156	69.7452
	90.9978	96.112	73.6107
	67.7987	72.2327	54.8222
Average	82.2867	87.2201	66.0594
SEM	7.29336	7.53706	5.72832
