# Supplementary material for: Drosophila PSI controls circadian period and the phase of circadian behavior under temperature cycle via tim splicing
Source: eLife journal article supplement (doi:10.7554/elife.50063), 2019-11-08
Supplement: supp [file elife-50063-supp-v1.zip › elife_poa_e50063_Figure_3_figure_supplement_2_source_data_2.xlsx]

## Sheet: Figure 3-S2
Figure 3-S2B
Morning 20°C
	TD2/PsiRNAiKK	TD2/PsiRNAiGD	TD2/+
Mean	63.51	58.78	60.68
SEM	9.086	3.509	5.268
Number of runs	3	3	3
One-way ANOVA followed by:
Tukey's multiple comparisons test	Mean Diff.	95.00% CI of diff.	Significant?	Summary	Adjusted P Value
TD2/PsiRNAiKK vs. TD2/PsiRNAiGD	4.731	-23.01 to 32.47	No	ns	0.8631
TD2/PsiRNAiKK vs. TD2/+	2.833	-24.91 to 30.57	No	ns	0.9478
TD2/PsiRNAiGD vs. TD2/+	-1.898	-29.64 to 25.84	No	ns	0.9761
Evening 20°C
	TD2/PsiRNAiKK	TD2/PsiRNAiGD	TD2/+
Mean	68.29	61.58	66.8
SEM	0.9661	1.449	1.281
Number of runs	3	3	3
One-way ANOVA followed by:
Tukey's multiple comparisons test	Mean Diff.	95.00% CI of diff.	Significant?	Summary	Adjusted P Value
TD2/PsiRNAiKK vs. TD2/PsiRNAiGD	6.706	1.29 to 12.12	Yes	*	0.021
TD2/PsiRNAiKK vs. TD2/+	1.487	-3.929 to 6.902	No	ns	0.6928
TD2/PsiRNAiGD vs. TD2/+	-5.219	-10.63 to 0.1963	No	ns	0.0574
Morning 25°C
	TD2/PsiRNAiKK	TD2/PsiRNAiGD	TD2/+
Mean	72.99	67.36	60.73
SEM	5.188	4.38	3.846
Number of runs	3	4	5
One-way ANOVA followed by:
Tukey's multiple comparisons test	Mean Diff.	95.00% CI of diff.	Significant?	Summary	Adjusted P Value
TD2/PsiRNAiKK vs. TD2/PsiRNAiGD	5.635	-13 to 24.27	No	ns	0.6866
TD2/PsiRNAiKK vs. TD2/+	12.26	-5.56 to 30.08	No	ns	0.1883
TD2/PsiRNAiGD vs. TD2/+	6.627	-9.743 to 23	No	ns	0.5207
Evening 25°C
	TD2/PsiRNAiKK	TD2/PsiRNAiGD	TD2/+
Mean	80.08	71.2	76.38
SEM	5.087	2.186	1.862
Number of runs	3	4	5
One-way ANOVA followed by:
Tukey's multiple comparisons test	Mean Diff.	95.00% CI of diff.	Significant?	Summary	Adjusted P Value
TD2/PsiRNAiKK vs. TD2/PsiRNAiGD	8.883	-3.053 to 20.82	No	ns	0.1496
TD2/PsiRNAiKK vs. TD2/+	3.703	-7.71 to 15.12	No	ns	0.6503
TD2/PsiRNAiGD vs. TD2/+	-5.18	-15.66 to 5.304	No	ns	0.3907
Morning 30°C
	TD2/PsiRNAiKK	TD2/PsiRNAiGD	TD2/+
Mean	60.22	60.59	61.83
SEM	1.103	1.696	1.181
Number of runs	3	3	3
One-way ANOVA followed by:
Tukey's multiple comparisons test	Mean Diff.	95.00% CI of diff.	Significant?	Summary	Adjusted P Value
TD2/PsiRNAiKK vs. TD2/PsiRNAiGD	-0.3665	-6.236 to 5.503	No	ns	0.98
TD2/PsiRNAiKK vs. TD2/+	-1.609	-7.478 to 4.26	No	ns	0.6934
TD2/PsiRNAiGD vs. TD2/+	-1.243	-7.112 to 4.626	No	ns	0.7994
Evening 30°C
	TD2/PsiRNAiKK	TD2/PsiRNAiGD	TD2/+
Mean	82.29	87.22	66.06
SEM	7.293	7.537	5.728
Number of runs	3	3	3
One-way ANOVA followed by:
Tukey's multiple comparisons test	Mean Diff.	95.00% CI of diff.	Significant?	Summary	Adjusted P Value
TD2/PsiRNAiKK vs. TD2/PsiRNAiGD	-4.933	-34.87 to 25.01	No	ns	0.8714
TD2/PsiRNAiKK vs. TD2/+	16.23	-13.71 to 46.17	No	ns	0.2929
TD2/PsiRNAiGD vs. TD2/+	21.16	-8.778 to 51.1	No	ns	0.1558
