# Supplementary material for: Drosophila PSI controls circadian period and the phase of circadian behavior under temperature cycle via tim splicing
Source: eLife journal article supplement (doi:10.7554/elife.50063), 2019-11-08
Supplement: supp [file elife-50063-supp-v1.zip › elife_poa_e50063_Figure_3_figure_supplement_3_source_data_1.xlsx]

## Sheet: TD2 1
Graphs show behavior in DD
LD: 7-Dec-17 to 12-Dec-17
DD: 13-Dec-17 to 18-Dec-17
TD2/+
	Time	No Light Pulse	ZT13 Pulse	No Light Pulse	ZT15 Pulse	No Light Pulse	ZT17 Pulse	No Light Pulse	ZT19 Pulse	No Light Pulse	ZT21 Pulse
2017-12-07	00:00:00	81.4375	78.875	81.4375	74.5625	81.4375	69.5625	81.4375	77.6875	81.4375	81
2017-12-07	00:30:00	82.0625	78.375	82.0625	73.75	82.0625	75.5	82.0625	66.625	82.0625	77.875
2017-12-07	01:00:00	75.625	74.0625	75.625	67.375	75.625	58.6875	75.625	62	75.625	73
2017-12-07	01:30:00	64.0625	64.125	64.0625	64.5625	64.0625	57.4375	64.0625	56.125	64.0625	59.25
2017-12-07	02:00:00	58.9688	63.5625	58.9688	52.9375	58.9688	53.625	58.9688	51.3125	58.9688	45
2017-12-07	02:30:00	61.7812	59.125	61.7812	65.375	61.7812	59.6875	61.7812	48.0625	61.7812	48.1875
2017-12-07	03:00:00	55.8125	51.9375	55.8125	49.4375	55.8125	49.6875	55.8125	43.6875	55.8125	33.6875
2017-12-07	03:30:00	53.0938	35.8125	53.0938	43.75	53.0938	40.8125	53.0938	35.9375	53.0938	16.6875
2017-12-07	04:00:00	39.0625	42.0625	39.0625	34.375	39.0625	32	39.0625	41.875	39.0625	14.6875
2017-12-07	04:30:00	31.0938	31.4375	31.0938	30.8125	31.0938	30.5625	31.0938	32.875	31.0938	19.5625
2017-12-07	05:00:00	38.6875	23.9375	38.6875	32.6875	38.6875	28.5	38.6875	24.6875	38.6875	16.125
2017-12-07	05:30:00	33.25	27.3125	33.25	38.8125	33.25	30.5	33.25	26.8125	33.25	23.8125
2017-12-07	06:00:00	37.0938	24.5	37.0938	36.4375	37.0938	32.625	37.0938	32.125	37.0938	20.9375
2017-12-07	06:30:00	32.8125	30.1875	32.8125	36	32.8125	24.75	32.8125	31.75	32.8125	33.4375
2017-12-07	07:00:00	31.0938	30.75	31.0938	27.5625	31.0938	31.6875	31.0938	34.1875	31.0938	23.375
2017-12-07	07:30:00	29.75	20.5625	29.75	26.5	29.75	23.1875	29.75	34.4375	29.75	27.1875
2017-12-07	08:00:00	36.1875	30.3125	36.1875	30.5625	36.1875	33.8125	36.1875	39.125	36.1875	14.9375
2017-12-07	08:30:00	38.7812	28.0625	38.7812	36.6875	38.7812	43.8125	38.7812	34.25	38.7812	25.5625
2017-12-07	09:00:00	26.125	25.6875	26.125	26.625	26.125	24.9375	26.125	38.875	26.125	15.125
2017-12-07	09:30:00	38.375	19.6875	38.375	28.0625	38.375	31.25	38.375	16.0625	38.375	25.9375
2017-12-07	10:00:00	28.4062	20.875	28.4062	22.375	28.4062	28.75	28.4062	32.375	28.4062	10.9375
2017-12-07	10:30:00	72.3125	75.875	72.3125	82.625	72.3125	70.5	72.3125	100.5	72.3125	97.625
2017-12-07	11:00:00	17	21.25	17	16.6875	17	10.5	17	29.4375	17	33.75
2017-12-07	11:30:00	1.59375	7.3125	1.59375	8.8125	1.59375	2.4375	1.59375	0.8125	1.59375	6.4375
2017-12-07	12:00:00	2.53125	0.9375	2.53125	6.1875	2.53125	3.8125	2.53125	4.9375	2.53125	2.1875
2017-12-07	12:30:00	2.1875	3.25	2.1875	1.5625	2.1875	5.25	2.1875	7.0625	2.1875	1
2017-12-07	13:00:00	6.03125	7.5625	6.03125	8.1875	6.03125	7.625	6.03125	17.625	6.03125	9.6875
2017-12-07	13:30:00	10.1562	8.75	10.1562	6.875	10.1562	9.3125	10.1562	12	10.1562	10.5625
2017-12-07	14:00:00	12.4688	16.1875	12.4688	7.375	12.4688	7.625	12.4688	19.4375	12.4688	15.875
2017-12-07	14:30:00	11.875	14.1875	11.875	9.625	11.875	17.1875	11.875	27.0625	11.875	25.5
2017-12-07	15:00:00	17.0938	20.5	17.0938	15.75	17.0938	15.125	17.0938	22.75	17.0938	20.0625
2017-12-07	15:30:00	10.5	28.8125	10.5	33	10.5	18.6875	10.5	9.25	10.5	11
2017-12-07	16:00:00	6.125	19	6.125	18.3125	6.125	27.8125	6.125	9.9375	6.125	14.8125
2017-12-07	16:30:00	21.1562	11.5	21.1562	17.6875	21.1562	28.4375	21.1562	17.375	21.1562	31.125
2017-12-07	17:00:00	31.0312	31	31.0312	43.3125	31.0312	25.6875	31.0312	22.0625	31.0312	37
2017-12-07	17:30:00	28.875	28.875	28.875	38.5625	28.875	31.25	28.875	40.9375	28.875	24.3125
2017-12-07	18:00:00	25.4062	33.1875	25.4062	40.5625	25.4062	28.3125	25.4062	50.25	25.4062	18.1875
2017-12-07	18:30:00	26.4375	35.5	26.4375	40.1875	26.4375	23.625	26.4375	47.875	26.4375	28.8125
2017-12-07	19:00:00	25.3125	26.375	25.3125	30.25	25.3125	17.75	25.3125	49.1875	25.3125	22.6875
2017-12-07	19:30:00	31.625	27.6875	31.625	43.625	31.625	33.9375	31.625	45.875	31.625	38.25
2017-12-07	20:00:00	41.1562	21.375	41.1562	38.8125	41.1562	28.8125	41.1562	38.6875	41.1562	46.1875
2017-12-07	20:30:00	26.1875	29.0625	26.1875	28.5	26.1875	35.875	26.1875	36.5	26.1875	36.8125
2017-12-07	21:00:00	22.6875	22.9375	22.6875	39.25	22.6875	25.6875	22.6875	46.75	22.6875	30.125
2017-12-07	21:30:00	32.0625	29.875	32.0625	45.9375	32.0625	41.375	32.0625	55.125	32.0625	49.8125
2017-12-07	22:00:00	35.6875	56.1875	35.6875	53.6875	35.6875	36.1875	35.6875	55.25	35.6875	44.625
2017-12-07	22:30:00	102.375	76.8125	102.375	76.5625	102.375	85.625	102.375	87.6875	102.375	86.25
2017-12-07	23:00:00	66.1562	48.9375	66.1562	55.1875	66.1562	60.125	66.1562	74	66.1562	51.625
2017-12-07	23:30:00	47.6562	47.125	47.6562	41.6875	47.6562	45.1875	47.6562	55.875	47.6562	48.375
2017-12-08	00:00:00	47.4375	37.0625	47.4375	27.3125	47.4375	42.8125	47.4375	39.9375	47.4375	33.4375
2017-12-08	00:30:00	40.0938	28.0625	40.0938	28	40.0938	39.0625	40.0938	39	40.0938	26.5625
2017-12-08	01:00:00	27.8438	23.5625	27.8438	27	27.8438	29.875	27.8438	21.1875	27.8438	14.25
2017-12-08	01:30:00	25.375	15.9375	25.375	14.625	25.375	21.125	25.375	18.5	25.375	16
2017-12-08	02:00:00	25.9688	18.875	25.9688	21.1875	25.9688	14	25.9688	11.5	25.9688	9.625
2017-12-08	02:30:00	12.2812	21.4375	12.2812	15.125	12.2812	28.25	12.2812	12.6875	12.2812	12.1875
2017-12-08	03:00:00	15.5938	9.625	15.5938	16.5	15.5938	11.9375	15.5938	10.125	15.5938	14.25
2017-12-08	03:30:00	13.2812	4.6875	13.2812	15.3125	13.2812	14.125	13.2812	7.1875	13.2812	3
2017-12-08	04:00:00	23.5	7.5625	23.5	9.1875	23.5	13.5	23.5	5.25	23.5	1.125
2017-12-08	04:30:00	12.4688	6.0625	12.4688	12.3125	12.4688	28.625	12.4688	17.375	12.4688	9.75
2017-12-08	05:00:00	20.2812	12	20.2812	19.125	20.2812	24.6875	20.2812	13.6875	20.2812	29.8125
2017-12-08	05:30:00	31.0625	20.5625	31.0625	21.8125	31.0625	39.0625	31.0625	17.1875	31.0625	24.5625
2017-12-08	06:00:00	43.2188	33	43.2188	40.5625	43.2188	42.75	43.2188	25.25	43.2188	32.25
2017-12-08	06:30:00	48.4062	46.4375	48.4062	55.875	48.4062	45.3125	48.4062	55.25	48.4062	61.9375
2017-12-08	07:00:00	60.0938	49.5625	60.0938	66.5625	60.0938	54.0625	60.0938	45.875	60.0938	64.8125
2017-12-08	07:30:00	58.25	49.8125	58.25	58.5625	58.25	56.875	58.25	46.9375	58.25	66.25
2017-12-08	08:00:00	78.9688	77.25	78.9688	77.5625	78.9688	76.5	78.9688	78.9375	78.9688	90.8125
2017-12-08	08:30:00	90.3125	81.4375	90.3125	78	90.3125	78.5	90.3125	87.4375	90.3125	99.4375
2017-12-08	09:00:00	93	91.75	93	94.875	93	90.5	93	91.8125	93	107.875
2017-12-08	09:30:00	102.688	91.125	102.688	94.125	102.688	89.875	102.688	102.938	102.688	115.938
2017-12-08	10:00:00	104.469	100.375	104.469	93.5625	104.469	84.5625	104.469	104.312	104.469	117.812
2017-12-08	10:30:00	92.3438	106.812	92.3438	98	92.3438	90.6875	92.3438	115.562	92.3438	109.375
2017-12-08	11:00:00	14.2812	18.4375	14.2812	17.6875	14.2812	13.1875	14.2812	26.75	14.2812	25.625
2017-12-08	11:30:00	2.25	1.625	2.25	2.9375	2.25	3.3125	2.25	10	2.25	5.5625
2017-12-08	12:00:00	3.40625	3.9375	3.40625	5.8125	3.40625	1.875	3.40625	8.1875	3.40625	6.125
2017-12-08	12:30:00	6.6875	10.9375	6.6875	1.0625	6.6875	5.625	6.6875	2.1875	6.6875	0.8125
2017-12-08	13:00:00	7.40625	2.25	7.40625	3.4375	7.40625	8	7.40625	5.4375	7.40625	0
2017-12-08	13:30:00	12.7188	1.5625	12.7188	4.625	12.7188	0.8125	12.7188	9.125	12.7188	12.625
2017-12-08	14:00:00	3.71875	5.8125	3.71875	8.625	3.71875	6	3.71875	8.125	3.71875	19.125
2017-12-08	14:30:00	8	9	8	21.5625	8	4.5625	8	3.1875	8	15.4375
2017-12-08	15:00:00	11.4375	5.125	11.4375	14	11.4375	8.875	11.4375	10.4375	11.4375	17.8125
2017-12-08	15:30:00	4.40625	8.25	4.40625	13.0625	4.40625	16.25	4.40625	11.1875	4.40625	11.4375
2017-12-08	16:00:00	17.8125	10	17.8125	19.6875	17.8125	17.5	17.8125	10.6875	17.8125	9
2017-12-08	16:30:00	23.0938	11.875	23.0938	14.4375	23.0938	16	23.0938	20.375	23.0938	8
2017-12-08	17:00:00	17.5	23.375	17.5	8.6875	17.5	13.0625	17.5	26	17.5	14.125
2017-12-08	17:30:00	13.0312	19.125	13.0312	23.9375	13.0312	10.8125	13.0312	21.6875	13.0312	35.4375
2017-12-08	18:00:00	20.8438	6.5625	20.8438	20.0625	20.8438	15.375	20.8438	12.375	20.8438	21.75
2017-12-08	18:30:00	12.5	25.25	12.5	34.6875	12.5	13.4375	12.5	18.3125	12.5	12.6875
2017-12-08	19:00:00	16.375	16.6875	16.375	21.4375	16.375	26.875	16.375	30.1875	16.375	21.5
2017-12-08	19:30:00	26.2188	13.375	26.2188	22.75	26.2188	27.4375	26.2188	41.25	26.2188	33.125
2017-12-08	20:00:00	35.0312	16.6875	35.0312	29.8125	35.0312	16	35.0312	37.6875	35.0312	37.75
2017-12-08	20:30:00	31.2188	40.5	31.2188	20.375	31.2188	14.3125	31.2188	37.75	31.2188	47.375
2017-12-08	21:00:00	30.75	25.875	30.75	27.125	30.75	28.4375	30.75	25.5625	30.75	34.0625
2017-12-08	21:30:00	35.5	44.875	35.5	45.9375	35.5	36.0625	35.5	58.6875	35.5	33.375
2017-12-08	22:00:00	48.75	49.5625	48.75	55.25	48.75	47.6875	48.75	64.6875	48.75	68.9375
2017-12-08	22:30:00	104.938	93.8125	104.938	76.5625	104.938	84.9375	104.938	87.6875	104.938	89.125
2017-12-08	23:00:00	60.8125	59.25	60.8125	46.125	60.8125	51	60.8125	45	60.8125	45.25
2017-12-08	23:30:00	35.4062	47.1875	35.4062	25.5625	35.4062	30.6875	35.4062	42.9375	35.4062	35.5625
2017-12-09	00:00:00	33.1875	28.4375	33.1875	21	33.1875	13.3125	33.1875	32.125	33.1875	27.5625
2017-12-09	00:30:00	25.625	24.25	25.625	14.8125	25.625	16.6875	25.625	18.0625	25.625	11.6875
2017-12-09	01:00:00	18.5312	19.625	18.5312	17.4375	18.5312	6.1875	18.5312	14.875	18.5312	9.5
2017-12-09	01:30:00	16.375	17.25	16.375	12.1875	16.375	10.5	16.375	10.8125	16.375	5.625
2017-12-09	02:00:00	9.03125	19.9375	9.03125	18.625	9.03125	8.5	9.03125	8.3125	9.03125	12.8125
2017-12-09	02:30:00	17.0938	13.6875	17.0938	8.9375	17.0938	16	17.0938	9.125	17.0938	12.75
2017-12-09	03:00:00	12.2812	12.875	12.2812	7.3125	12.2812	12.75	12.2812	8.625	12.2812	7.5625
2017-12-09	03:30:00	6.84375	3.625	6.84375	5.9375	6.84375	7.875	6.84375	8.875	6.84375	5.875
2017-12-09	04:00:00	4.25	9.8125	4.25	9.625	4.25	0.4375	4.25	8.8125	4.25	2.4375
2017-12-09	04:30:00	9.15625	2.875	9.15625	7.0625	9.15625	1.625	9.15625	8.1875	9.15625	5
2017-12-09	05:00:00	19.25	3	19.25	8	19.25	14.125	19.25	5.9375	19.25	2.125
2017-12-09	05:30:00	15.25	12.875	15.25	25	15.25	18.25	15.25	11.25	15.25	4.3125
2017-12-09	06:00:00	22.6562	13.6875	22.6562	35.9375	22.6562	14.5625	22.6562	7.3125	22.6562	35.75
2017-12-09	06:30:00	43.625	15.6875	43.625	33.4375	43.625	23.375	43.625	21.25	43.625	28.75
2017-12-09	07:00:00	56.125	33.5	56.125	37.0625	56.125	56.125	56.125	25.5	56.125	38.5
2017-12-09	07:30:00	53.9375	46.125	53.9375	52.375	53.9375	42.5	53.9375	52.4375	53.9375	57.8125
2017-12-09	08:00:00	62.1562	59.9375	62.1562	56.0625	62.1562	63.1875	62.1562	64.4375	62.1562	65.5625
2017-12-09	08:30:00	73.0938	56.8125	73.0938	63.3125	73.0938	67.6875	73.0938	62.6875	73.0938	80.25
2017-12-09	09:00:00	76.75	67.125	76.75	64.9375	76.75	69.5	76.75	72	76.75	95.5
2017-12-09	09:30:00	85.8438	77.8125	85.8438	74.75	85.8438	76.625	85.8438	84.125	85.8438	101.5
2017-12-09	10:00:00	96.4375	85	96.4375	80.0625	96.4375	85.25	96.4375	94.125	96.4375	112.812
2017-12-09	10:30:00	94.2188	114.562	94.2188	92.5625	94.2188	91.75	94.2188	108.812	94.2188	113
2017-12-09	11:00:00	29.9062	60.5625	29.9062	26.4375	29.9062	14.25	29.9062	33.5625	29.9062	44.25
2017-12-09	11:30:00	7.0625	35.0625	7.0625	12.5625	7.0625	13.0625	7.0625	20.5625	7.0625	23
2017-12-09	12:00:00	9.875	8.4375	9.875	7.375	9.875	2.75	9.875	15.5	9.875	7.4375
2017-12-09	12:30:00	12.25	7.9375	12.25	3.75	12.25	3.25	12.25	12.125	12.25	4.125
2017-12-09	13:00:00	5.15625	5.875	5.15625	8	5.15625	4.5625	5.15625	3	5.15625	4.125
2017-12-09	13:30:00	6.25	10.875	6.25	3.125	6.25	3	6.25	6.0625	6.25	1.1875
2017-12-09	14:00:00	10.875	15.8125	10.875	6.3125	10.875	3.75	10.875	13.5	10.875	2.6875
2017-12-09	14:30:00	12.5938	14.3125	12.5938	20.75	12.5938	10.125	12.5938	16.375	12.5938	12.9375
2017-12-09	15:00:00	19.6562	14.25	19.6562	20.4375	19.6562	3.6875	19.6562	11	19.6562	5.5
2017-12-09	15:30:00	12.5625	12.4375	12.5625	15.0625	12.5625	6.4375	12.5625	14	12.5625	8.8125
2017-12-09	16:00:00	9.125	13	9.125	25.75	9.125	14.4375	9.125	28.3125	9.125	22.625
2017-12-09	16:30:00	18.0938	10.875	18.0938	20.3125	18.0938	16.4375	18.0938	17.75	18.0938	18.1875
2017-12-09	17:00:00	15.25	20	15.25	13	15.25	23.625	15.25	10.0625	15.25	19.5
2017-12-09	17:30:00	17	22.125	17	15.125	17	7.4375	17	10.75	17	12.5
2017-12-09	18:00:00	19.0938	19.5	19.0938	14.6875	19.0938	8.9375	19.0938	8.3125	19.0938	19
2017-12-09	18:30:00	21.7188	13.3125	21.7188	16.5625	21.7188	11.5625	21.7188	19.875	21.7188	32.4375
2017-12-09	19:00:00	27.2812	16.5625	27.2812	16.8125	27.2812	21.3125	27.2812	29.125	27.2812	22.0625
2017-12-09	19:30:00	29.0938	13.75	29.0938	38.125	29.0938	28.125	29.0938	29.125	29.0938	22.9375
2017-12-09	20:00:00	18.9688	31.0625	18.9688	32.25	18.9688	31.3125	18.9688	33.1875	18.9688	38.75
2017-12-09	20:30:00	19.1875	17.3125	19.1875	20.1875	19.1875	16.8125	19.1875	43.5625	19.1875	33.875
2017-12-09	21:00:00	33.9688	15.75	33.9688	29.3125	33.9688	18.1875	33.9688	35.5	33.9688	38.0625
2017-12-09	21:30:00	36.5938	35.375	36.5938	44.8125	36.5938	37.875	36.5938	60.4375	36.5938	37.875
2017-12-09	22:00:00	48.8438	53.25	48.8438	46.5	48.8438	42.3125	48.8438	67.0625	48.8438	54.1875
2017-12-09	22:30:00	104.188	91.375	104.188	74.4375	104.188	84.9375	104.188	98.25	104.188	99.8125
2017-12-09	23:00:00	50.625	50.25	50.625	40.25	50.625	39.625	50.625	69.3125	50.625	52.1875
2017-12-09	23:30:00	31.9062	27.375	31.9062	21.0625	31.9062	37.25	31.9062	34	31.9062	31.0625
2017-12-10	00:00:00	22.7812	19.625	22.7812	15.625	22.7812	19.9375	22.7812	18.125	22.7812	20.1875
2017-12-10	00:30:00	16.6562	8.4375	16.6562	13.5625	16.6562	18	16.6562	14.875	16.6562	23.25
2017-12-10	01:00:00	20.5938	14	20.5938	9.9375	20.5938	7.5625	20.5938	14.3125	20.5938	10.4375
2017-12-10	01:30:00	8.8125	16.5625	8.8125	17.1875	8.8125	11.4375	8.8125	12.125	8.8125	8.5625
2017-12-10	02:00:00	9.375	16.125	9.375	6.4375	9.375	14.1875	9.375	10.4375	9.375	3
2017-12-10	02:30:00	7.46875	19.0625	7.46875	11.5	7.46875	13.5625	7.46875	9.75	7.46875	6.4375
2017-12-10	03:00:00	8.15625	9.0625	8.15625	2.9375	8.15625	9.75	8.15625	6.875	8.15625	3.3125
2017-12-10	03:30:00	4.09375	11.5	4.09375	9.125	4.09375	4.25	4.09375	11.3125	4.09375	9.9375
2017-12-10	04:00:00	5.625	4.1875	5.625	3.5	5.625	1.6875	5.625	8.5625	5.625	3.0625
2017-12-10	04:30:00	2.90625	8.125	2.90625	11.375	2.90625	3.4375	2.90625	22.125	2.90625	0.125
2017-12-10	05:00:00	7.65625	6.0625	7.65625	4	7.65625	5.5625	7.65625	1.125	7.65625	3
2017-12-10	05:30:00	18.625	9.8125	18.625	12.6875	18.625	8.9375	18.625	6.6875	18.625	12.0625
2017-12-10	06:00:00	26.1562	11.1875	26.1562	25	26.1562	21.875	26.1562	25.5625	26.1562	18.9375
2017-12-10	06:30:00	37.7812	21.5625	37.7812	37.125	37.7812	19.6875	37.7812	18	37.7812	42.75
2017-12-10	07:00:00	44.125	21	44.125	35.75	44.125	37.3125	44.125	24.5625	44.125	49.5
2017-12-10	07:30:00	53.2812	35.4375	53.2812	41	53.2812	47.25	53.2812	42.375	53.2812	57.1875
2017-12-10	08:00:00	59.5	56	59.5	57.125	59.5	60.125	59.5	63.5625	59.5	60.25
2017-12-10	08:30:00	63.3438	62.125	63.3438	58.3125	63.3438	64.5	63.3438	80.5625	63.3438	74.5625
2017-12-10	09:00:00	81.625	65.75	81.625	68	81.625	68.9375	81.625	83.1875	81.625	96.375
2017-12-10	09:30:00	81.3125	82.0625	81.3125	75.125	81.3125	79	81.3125	96.1875	81.3125	99.75
2017-12-10	10:00:00	85.625	82.9375	85.625	70.125	85.625	75.8125	85.625	91.3125	85.625	114
2017-12-10	10:30:00	84.625	91.625	84.625	80.3125	84.625	81.9375	84.625	106.812	84.625	112.688
2017-12-10	11:00:00	41.1562	49.6875	41.1562	23.75	41.1562	16.9375	41.1562	50.1875	41.1562	34.625
2017-12-10	11:30:00	12.0312	32.5625	12.0312	16.1875	12.0312	5.75	12.0312	27.625	12.0312	10.125
2017-12-10	12:00:00	3.4375	7.4375	3.4375	5.3125	3.4375	2	3.4375	8.1875	3.4375	6
2017-12-10	12:30:00	3.9375	13.4375	3.9375	6.625	3.9375	0.75	3.9375	4.25	3.9375	6.25
2017-12-10	13:00:00	5.125	4.25	5.125	9.875	5.125	5.9375	5.125	3.5625	5.125	10.1875
2017-12-10	13:30:00	7.3125	11.3125	7.3125	6.8125	7.3125	1.25	7.3125	8.9375	7.3125	5.1875
2017-12-10	14:00:00	13.6875	10.1875	13.6875	9.5625	13.6875	5.1875	13.6875	16.3125	13.6875	5.6875
2017-12-10	14:30:00	13.625	7.25	13.625	15.9375	13.625	10.625	13.625	24.125	13.625	14.125
2017-12-10	15:00:00	22.1875	7.3125	22.1875	17.1875	22.1875	20.5	22.1875	16.9375	22.1875	7.75
2017-12-10	15:30:00	16.25	7.5625	16.25	19.5	16.25	18.1875	16.25	12.1875	16.25	19.375
2017-12-10	16:00:00	19.4688	5.5	19.4688	16.9375	19.4688	16.9375	19.4688	9.5	19.4688	39.4375
2017-12-10	16:30:00	10.7812	20.4375	10.7812	11.5	10.7812	6	10.7812	22.3125	10.7812	22.375
2017-12-10	17:00:00	16.5312	19.3125	16.5312	10.5625	16.5312	12.3125	16.5312	15.9375	16.5312	16.8125
2017-12-10	17:30:00	12.125	14.0625	12.125	12.4375	12.125	4.75	12.125	13.25	12.125	26.6875
2017-12-10	18:00:00	7.8125	25.375	7.8125	36.125	7.8125	15.375	7.8125	12.9375	7.8125	17.3125
2017-12-10	18:30:00	14.0625	7.5	14.0625	15.5625	14.0625	10.5	14.0625	22.75	14.0625	21.1875
2017-12-10	19:00:00	23.1562	27.1875	23.1562	15.375	23.1562	11.1875	23.1562	12	23.1562	16.75
2017-12-10	19:30:00	29.9375	16.3125	29.9375	24.75	29.9375	28.5	29.9375	32.5	29.9375	21.25
2017-12-10	20:00:00	29.0625	24.75	29.0625	30.9375	29.0625	23.375	29.0625	54.125	29.0625	28
2017-12-10	20:30:00	26.0312	26.25	26.0312	9.5625	26.0312	15.8125	26.0312	38.1875	26.0312	25
2017-12-10	21:00:00	17.0625	31.4375	17.0625	27.5	17.0625	15.625	17.0625	27.875	17.0625	42.25
2017-12-10	21:30:00	26.375	26.3125	26.375	32.0625	26.375	19.4375	26.375	44.3125	26.375	50.0625
2017-12-10	22:00:00	56.5312	45.125	56.5312	50.9375	56.5312	33.4375	56.5312	53.3125	56.5312	58.625
2017-12-10	22:30:00	100.625	91	100.625	71.625	100.625	81.4375	100.625	87.5	100.625	102
2017-12-10	23:00:00	48.0312	43.25	48.0312	37.5	48.0312	42.25	48.0312	50.4375	48.0312	52
2017-12-10	23:30:00	28.4062	28.6875	28.4062	20.25	28.4062	24.1875	28.4062	31.0625	28.4062	39.6875
2017-12-11	00:00:00	23.9375	21.6875	23.9375	25.8125	23.9375	13.75	23.9375	21.8125	23.9375	27.6875
2017-12-11	00:30:00	13.4375	17	13.4375	9.5	13.4375	7.75	13.4375	11.875	13.4375	18.0625
2017-12-11	01:00:00	13.8438	18.375	13.8438	16.9375	13.8438	7.6875	13.8438	5.875	13.8438	17.375
2017-12-11	01:30:00	8.46875	11.3125	8.46875	11.3125	8.46875	7.5	8.46875	9.5	8.46875	2.625
2017-12-11	02:00:00	10.9062	16.9375	10.9062	11.625	10.9062	2.125	10.9062	9.5	10.9062	3.5
2017-12-11	02:30:00	11	7.5625	11	5.5	11	8.125	11	6.0625	11	9.75
2017-12-11	03:00:00	7.59375	9.0625	7.59375	5.5625	7.59375	6.625	7.59375	14.4375	7.59375	3.1875
2017-12-11	03:30:00	3.6875	4.25	3.6875	7.3125	3.6875	4.5	3.6875	8.6875	3.6875	5.375
2017-12-11	04:00:00	3.78125	5.9375	3.78125	4.75	3.78125	4.625	3.78125	3.625	3.78125	8.125
2017-12-11	04:30:00	2.125	2.75	2.125	6.4375	2.125	0.375	2.125	6.9375	2.125	2.9375
2017-12-11	05:00:00	1.96875	7	1.96875	4.0625	1.96875	4.0625	1.96875	3.5625	1.96875	2.4375
2017-12-11	05:30:00	11.4375	9.4375	11.4375	9.75	11.4375	4.125	11.4375	7	11.4375	10
2017-12-11	06:00:00	29.0625	8.875	29.0625	29.9375	29.0625	17.75	29.0625	3.3125	29.0625	18.25
2017-12-11	06:30:00	39.5625	18.1875	39.5625	30.25	39.5625	29.6875	39.5625	12.4375	39.5625	33
2017-12-11	07:00:00	43.4062	41.6875	43.4062	46.8125	43.4062	37.0625	43.4062	34.75	43.4062	56.875
2017-12-11	07:30:00	51.0625	34.3125	51.0625	44.5625	51.0625	43.5625	51.0625	52.25	51.0625	56
2017-12-11	08:00:00	62.9688	60.3125	62.9688	55.3125	62.9688	64.1875	62.9688	62	62.9688	70.4375
2017-12-11	08:30:00	70.9375	61.75	70.9375	54.875	70.9375	61.5	70.9375	73.625	70.9375	76.8125
2017-12-11	09:00:00	72.4688	69.8125	72.4688	65.25	72.4688	63.125	72.4688	91.25	72.4688	92.1875
2017-12-11	09:30:00	80.7188	80.125	80.7188	67.9375	80.7188	68.9375	80.7188	80.5625	80.7188	98.875
2017-12-11	10:00:00	92	77.9375	92	72	92	67.9375	92	83.875	92	112.188
2017-12-11	10:30:00	76.875	96.4375	76.875	77.4375	76.875	76.375	76.875	99.9375	76.875	118.438
2017-12-11	11:00:00	29.2812	56.9375	29.2812	20.875	29.2812	13.0625	29.2812	48.5625	29.2812	38.625
2017-12-11	11:30:00	12.5625	28.375	12.5625	15.0625	12.5625	4.4375	12.5625	26.5	12.5625	11.75
2017-12-11	12:00:00	4.375	21.3125	4.375	5.25	4.375	1.875	4.375	15.25	4.375	10.4375
2017-12-11	12:30:00	4.21875	11.0625	4.21875	5.5625	4.21875	7.4375	4.21875	7.6875	4.21875	6.9375
2017-12-11	13:00:00	5.5625	8.6875	5.5625	2.3125	5.5625	6.375	5.5625	7	5.5625	9.5
2017-12-11	13:30:00	8.40625	10.125	8.40625	11.625	8.40625	8.625	8.40625	12.8125	8.40625	18.25
2017-12-11	14:00:00	18	21.3125	18	10.6875	18	0.625	18	6.3125	18	10.3125
2017-12-11	14:30:00	21.875	25.4375	21.875	18.375	21.875	7.9375	21.875	14.625	21.875	14.125
2017-12-11	15:00:00	5.3125	5.125	5.3125	11	5.3125	13.625	5.3125	3.5625	5.3125	21.625
2017-12-11	15:30:00	8.28125	1.9375	8.28125	9.3125	8.28125	2.625	8.28125	13.5625	8.28125	19.6875
2017-12-11	16:00:00	15.0625	23.4375	15.0625	1.6875	15.0625	10.875	15.0625	22.9375	15.0625	26.5625
2017-12-11	16:30:00	15.4688	20.4375	15.4688	12.3125	15.4688	9.9375	15.4688	23.125	15.4688	27.25
2017-12-11	17:00:00	13.4375	7.625	13.4375	14.125	13.4375	7.4375	13.4375	16.1875	13.4375	19.6875
2017-12-11	17:30:00	15.7812	14.1875	15.7812	16.9375	15.7812	17.0625	15.7812	18.875	15.7812	14.6875
2017-12-11	18:00:00	16.9375	9.875	16.9375	16.4375	16.9375	14.375	16.9375	15.125	16.9375	6
2017-12-11	18:30:00	16.5	22.8125	16.5	23.5	16.5	10	16.5	16.1875	16.5	23.6875
2017-12-11	19:00:00	21.9688	18.0625	21.9688	19.3125	21.9688	14.5	21.9688	16.5625	21.9688	26.3125
2017-12-11	19:30:00	29.75	15.3125	29.75	22.4375	29.75	19.375	29.75	32.6875	29.75	42.125
2017-12-11	20:00:00	25.6562	22.0625	25.6562	25.875	25.6562	13.5	25.6562	22.5	25.6562	25.125
2017-12-11	20:30:00	29.9062	17.1875	29.9062	18.1875	29.9062	10	29.9062	30.125	29.9062	18
2017-12-11	21:00:00	24.5625	19.9375	24.5625	29.0625	24.5625	21.1875	24.5625	38.5625	24.5625	19.8125
2017-12-11	21:30:00	32.375	16	32.375	31.9375	32.375	14.1875	32.375	46.75	32.375	38.3125
2017-12-11	22:00:00	38.5625	39.625	38.5625	51.1875	38.5625	20.6875	38.5625	41.125	38.5625	74.1875
2017-12-11	22:30:00	90.8125	73.4375	90.8125	65.625	90.8125	68.625	90.8125	94.1875	90.8125	101.5
2017-12-11	23:00:00	44.75	27.8125	44.75	33	44.75	33.1875	44.75	38.75	44.75	51.8125
2017-12-11	23:30:00	21.2812	22.75	21.2812	24.6875	21.2812	24.75	21.2812	23.25	21.2812	40.5
2017-12-12	00:00:00	26	16.8125	26	7.25	26	18.0625	26	18.125	26	27.4375
2017-12-12	00:30:00	16.3438	11.1875	16.3438	6.0625	16.3438	9.6875	16.3438	2.125	16.3438	9.5
2017-12-12	01:00:00	13.125	14.0625	13.125	9.4375	13.125	7.375	13.125	5.5625	13.125	8.875
2017-12-12	01:30:00	8	14.625	8	2.3125	8	6	8	8.1875	8	10.625
2017-12-12	02:00:00	3.5	5.625	3.5	7.4375	3.5	6.125	3.5	5.75	3.5	3.8125
2017-12-12	02:30:00	8.125	8.6875	8.125	8.625	8.125	4.5625	8.125	7.5625	8.125	22.875
2017-12-12	03:00:00	7.53125	8.375	7.53125	7.25	7.53125	4.8125	7.53125	4	7.53125	4.875
2017-12-12	03:30:00	4.28125	3.4375	4.28125	0.625	4.28125	0.75	4.28125	3.5625	4.28125	6.0625
2017-12-12	04:00:00	2.28125	1.8125	2.28125	3.6875	2.28125	1.125	2.28125	0.8125	2.28125	3.8125
2017-12-12	04:30:00	5.4375	2.625	5.4375	1.0625	5.4375	2.375	5.4375	0.0625	5.4375	2.5625
2017-12-12	05:00:00	4.34375	0.125	4.34375	0.8125	4.34375	5.625	4.34375	0	4.34375	0.25
2017-12-12	05:30:00	12.4062	3.9375	12.4062	6.75	12.4062	5.125	12.4062	4.0625	12.4062	9.4375
2017-12-12	06:00:00	28.6562	4.1875	28.6562	13.1875	28.6562	15.6875	28.6562	13.875	28.6562	22.125
2017-12-12	06:30:00	28.25	23.875	28.25	35.125	28.25	28.4375	28.25	20	28.25	40.5625
2017-12-12	07:00:00	42.4062	24.8125	42.4062	48.5	42.4062	51.625	42.4062	29.5625	42.4062	44.3125
2017-12-12	07:30:00	44.375	39.75	44.375	49.5	44.375	49.5	44.375	34.6875	44.375	57.8125
2017-12-12	08:00:00	57.7812	55.6875	57.7812	48.25	57.7812	52.0625	57.7812	70.8125	57.7812	66.25
2017-12-12	08:30:00	57.125	61.5625	57.125	56.5625	57.125	54.0625	57.125	74.0625	57.125	80.375
2017-12-12	09:00:00	70.5	68	70.5	64.625	70.5	59.625	70.5	75.6875	70.5	92.625
2017-12-12	09:30:00	75.9375	82.75	75.9375	70.875	75.9375	70	75.9375	76.3125	75.9375	97.5625
2017-12-12	10:00:00	84.8438	83	84.8438	73.375	84.8438	64.6875	84.8438	80.3125	84.8438	104.812
2017-12-12	10:30:00	76.0312	91.75	76.0312	80.5625	76.0312	69.0625	76.0312	101.312	76.0312	110
2017-12-12	11:00:00	27.1875	45.625	27.1875	26.375	27.1875	20.9375	27.1875	44.875	27.1875	40
2017-12-12	11:30:00	25.1562	0	25.1562	26	25.1562	29.8125	25.1562	38.0625	25.1562	32.4375
2017-12-12	12:00:00	8.125	71.375	8.125	12.4375	8.125	15.125	8.125	22.25	8.125	11.875
2017-12-12	12:30:00	7.75	23.0625	7.75	2.6875	7.75	1.875	7.75	10.875	7.75	4
2017-12-12	13:00:00	7.40625	12.875	7.40625	1.4375	7.40625	2.5	7.40625	4.9375	7.40625	4.8125
2017-12-12	13:30:00	14.0938	42.1875	14.0938	0	14.0938	9.75	14.0938	32.625	14.0938	21.5
2017-12-12	14:00:00	5.625	2.4375	5.625	21.5625	5.625	0.9375	5.625	8.1875	5.625	8.125
2017-12-12	14:30:00	11.9375	5.8125	11.9375	14.3125	11.9375	10.875	11.9375	12	11.9375	11.25
2017-12-12	15:00:00	8.875	10.4375	8.875	4.6875	8.875	4.1875	8.875	16.625	8.875	15.25
2017-12-12	15:30:00	51.9062	54.1875	51.9062	33.3125	51.9062	0	51.9062	82.625	51.9062	72.0625
2017-12-12	16:00:00	15.75	9.375	15.75	10.3125	15.75	39.0625	15.75	24.125	15.75	31
2017-12-12	16:30:00	7.5625	13.25	7.5625	15	7.5625	9.3125	7.5625	14.1875	7.5625	4.5
2017-12-12	17:00:00	12.875	20.6875	12.875	28.75	12.875	11.4375	12.875	0	12.875	11.6875
2017-12-12	17:30:00	40.2188	39.3125	40.2188	41.125	40.2188	28.6875	40.2188	0	40.2188	44
2017-12-12	18:00:00	10.7188	18.1875	10.7188	2.9375	10.7188	6.1875	10.7188	16.375	10.7188	20.25
2017-12-12	18:30:00	11.7188	20.3125	11.7188	12.25	11.7188	9.25	11.7188	9.125	11.7188	14.3125
2017-12-12	19:00:00	17.1562	19.8125	17.1562	10.875	17.1562	11.75	17.1562	9.1875	17.1562	17.75
2017-12-12	19:30:00	48.9062	15.9375	48.9062	24.8125	48.9062	17.5625	48.9062	35.5	48.9062	76.9375
2017-12-12	20:00:00	16.4375	14.8125	16.4375	13.75	16.4375	25.375	16.4375	30.375	16.4375	48.375
2017-12-12	20:30:00	19.8438	30.25	19.8438	27.75	19.8438	10.4375	19.8438	30.6875	19.8438	25.75
2017-12-12	21:00:00	20.75	19.75	20.75	16.75	20.75	14.5	20.75	36.8125	20.75	30.3125
2017-12-12	21:30:00	31.2812	10.9375	31.2812	19.75	31.2812	22.4375	31.2812	31.1875	31.2812	56.25
2017-12-12	22:00:00	43.2188	19.9375	43.2188	30.5625	43.2188	9.875	43.2188	38.8125	43.2188	40.25
2017-12-12	22:30:00	38.7812	29.875	38.7812	26.5	38.7812	14.5625	38.7812	33.9375	38.7812	52.25
2017-12-12	23:00:00	37.8438	45.9375	37.8438	10.625	37.8438	21.625	37.8438	30.6875	37.8438	39.4375
2017-12-12	23:30:00	33.7188	39.75	33.7188	32.0625	33.7188	23.3125	33.7188	26.625	33.7188	58.4375
2017-12-13	00:00:00	31.1875	30.8125	31.1875	33.6875	31.1875	25.0625	31.1875	33.375	31.1875	48.3125
2017-12-13	00:30:00	30.25	43.25	30.25	33.875	30.25	24.25	30.25	31.5625	30.25	35.0625
2017-12-13	01:00:00	24.0625	35.8125	24.0625	41.625	24.0625	32.5625	24.0625	28.3125	24.0625	31.8125
2017-12-13	01:30:00	38.8125	34.6875	38.8125	25.875	38.8125	22.9375	38.8125	31	38.8125	32.875
2017-12-13	02:00:00	26.4062	23.875	26.4062	20.8125	26.4062	28.5625	26.4062	21.875	26.4062	30.625
2017-12-13	02:30:00	32.5312	36.9375	32.5312	30.125	32.5312	15.1875	32.5312	38.5	32.5312	46.5
2017-12-13	03:00:00	26.0938	26.4375	26.0938	36.0625	26.0938	21.3125	26.0938	37.875	26.0938	27.125
2017-12-13	03:30:00	24.5	16.5625	24.5	27.4375	24.5	29.9375	24.5	34.375	24.5	59.375
2017-12-13	04:00:00	29.125	27.75	29.125	24.1875	29.125	23.0625	29.125	46	29.125	48.375
2017-12-13	04:30:00	34.4688	30.375	34.4688	18.5625	34.4688	22.6875	34.4688	49.0625	34.4688	67.5
2017-12-13	05:00:00	50.0625	28.75	50.0625	31.1875	50.0625	21.6875	50.0625	51.125	50.0625	64.875
2017-12-13	05:30:00	43.8125	29.8125	43.8125	28.3125	43.8125	23.4375	43.8125	53.625	43.8125	67.4375
2017-12-13	06:00:00	50.5938	48.125	50.5938	32.4375	50.5938	22.875	50.5938	60.375	50.5938	73.1875
2017-12-13	06:30:00	54.5	54.5625	54.5	16.0625	54.5	25.625	54.5	54.3125	54.5	73.4375
2017-12-13	07:00:00	52.7188	38.3125	52.7188	24.875	52.7188	21.1875	52.7188	56.125	52.7188	81.0625
2017-12-13	07:30:00	59	52.625	59	33.9375	59	34.125	59	56.3125	59	84.1875
2017-12-13	08:00:00	54.0312	61	54.0312	36.1875	54.0312	35.6875	54.0312	60.375	54.0312	75.625
2017-12-13	08:30:00	56.2188	59.9375	56.2188	47.4375	56.2188	18	56.2188	64.125	56.2188	68.5
2017-12-13	09:00:00	52.0312	51.0625	52.0312	45.75	52.0312	49.125	52.0312	62.4375	52.0312	72.4375
2017-12-13	09:30:00	57.875	57.9375	57.875	42.3125	57.875	40.1875	57.875	61.5	57.875	58.0625
2017-12-13	10:00:00	56.0625	64.75	56.0625	46.6875	56.0625	39.625	56.0625	58.0625	56.0625	48.1875
2017-12-13	10:30:00	57.3438	59.75	57.3438	52.125	57.3438	48.1875	57.3438	61.25	57.3438	38.875
2017-12-13	11:00:00	59.25	52.4375	59.25	47.6875	59.25	43.9375	59.25	57.1875	59.25	27.25
2017-12-13	11:30:00	51.6562	70.875	51.6562	50.125	51.6562	47.5	51.6562	58.25	51.6562	16
2017-12-13	12:00:00	38.6875	70.1875	38.6875	43.625	38.6875	41.5625	38.6875	46.875	38.6875	17.625
2017-12-13	12:30:00	36	59.125	36	56.5625	36	50.9375	36	39	36	17.4375
2017-12-13	13:00:00	31.2812	65.8125	31.2812	54.6875	31.2812	53.25	31.2812	24.375	31.2812	13.125
2017-12-13	13:30:00	11.5	51.0625	11.5	63.1875	11.5	53.5625	11.5	22.3125	11.5	10.0625
2017-12-13	14:00:00	16.6562	28.8125	16.6562	55.5625	16.6562	51.875	16.6562	26.1875	16.6562	6.3125
2017-12-13	14:30:00	20.0312	46.5625	20.0312	62.0625	20.0312	58.8125	20.0312	22.0625	20.0312	14.625
2017-12-13	15:00:00	13.2812	16.4375	13.2812	41.6875	13.2812	45.1875	13.2812	18.5625	13.2812	17.5
2017-12-13	15:30:00	7.4375	9.1875	7.4375	27.25	7.4375	40.4375	7.4375	4.3125	7.4375	9.6875
2017-12-13	16:00:00	7.4375	17.625	7.4375	18.6875	7.4375	19.9375	7.4375	4.625	7.4375	9.5625
2017-12-13	16:30:00	17.7812	16.6875	17.7812	20.625	17.7812	11.875	17.7812	3.8125	17.7812	15.4375
2017-12-13	17:00:00	12.9062	9.5	12.9062	12.8125	12.9062	4.375	12.9062	6.5	12.9062	5.5
2017-12-13	17:30:00	11.2812	25.125	11.2812	17.5	11.2812	2.3125	11.2812	14.4375	11.2812	18.5
2017-12-13	18:00:00	11.5625	7.5625	11.5625	9	11.5625	1.4375	11.5625	12.0625	11.5625	18.5
2017-12-13	18:30:00	11.4375	5.9375	11.4375	16.3125	11.4375	6.75	11.4375	18.3125	11.4375	41.25
2017-12-13	19:00:00	17.9062	25.4375	17.9062	10.8125	17.9062	8	17.9062	17.25	17.9062	36.9375
2017-12-13	19:30:00	15.4375	19.875	15.4375	18	15.4375	3.125	15.4375	14.9375	15.4375	36.0625
2017-12-13	20:00:00	24.9375	19.0625	24.9375	7.0625	24.9375	10.9375	24.9375	28	24.9375	39.1875
2017-12-13	20:30:00	23.8125	11	23.8125	14.375	23.8125	9.8125	23.8125	30.875	23.8125	24.9375
2017-12-13	21:00:00	22.4062	20.1875	22.4062	10.4375	22.4062	19.4375	22.4062	22	22.4062	26.6875
2017-12-13	21:30:00	17.3125	15.1875	17.3125	14.0625	17.3125	1.9375	17.3125	19.75	17.3125	41.5625
2017-12-13	22:00:00	28.8125	11.5	28.8125	6.6875	28.8125	10.125	28.8125	20.625	28.8125	45
2017-12-13	22:30:00	31.3125	4.625	31.3125	13.0625	31.3125	13	31.3125	30.9375	31.3125	35.6875
2017-12-13	23:00:00	33.9062	27.125	33.9062	14.5625	33.9062	16.0625	33.9062	19	33.9062	34.375
2017-12-13	23:30:00	26.4062	19.0625	26.4062	15.5	26.4062	15.5	26.4062	37.5	26.4062	23.5625
2017-12-14	00:00:00	24.7812	25.5625	24.7812	33.5	24.7812	23.6875	24.7812	17.4375	24.7812	30.125
2017-12-14	00:30:00	33.4375	21.9375	33.4375	28.6875	33.4375	14.9375	33.4375	16.625	33.4375	24.6875
2017-12-14	01:00:00	21.1875	27.75	21.1875	14.4375	21.1875	17.125	21.1875	30.8125	21.1875	37.0625
2017-12-14	01:30:00	27.25	25.1875	27.25	24.125	27.25	14.25	27.25	27.0625	27.25	29.625
2017-12-14	02:00:00	25.75	19.6875	25.75	20.625	25.75	17.0625	25.75	23.125	25.75	25.375
2017-12-14	02:30:00	22.8125	20	22.8125	19.625	22.8125	11.75	22.8125	13.5625	22.8125	48.625
2017-12-14	03:00:00	23.7188	28.3125	23.7188	31.875	23.7188	27.9375	23.7188	21.4375	23.7188	46.0625
2017-12-14	03:30:00	26.2812	18	26.2812	17.5625	26.2812	22.1875	26.2812	23.4375	26.2812	55.9375
2017-12-14	04:00:00	27.4375	31.875	27.4375	20.25	27.4375	26.0625	27.4375	26.625	27.4375	47.1875
2017-12-14	04:30:00	30.0938	17.75	30.0938	31.5	30.0938	22	30.0938	44.625	30.0938	55
2017-12-14	05:00:00	39.9062	22.5625	39.9062	23.1875	39.9062	17.4375	39.9062	45.9375	39.9062	53.0625
2017-12-14	05:30:00	40.75	28.875	40.75	19.625	40.75	18.3125	40.75	42.0625	40.75	46
2017-12-14	06:00:00	45.0312	31.9375	45.0312	16.75	45.0312	22.8125	45.0312	42.75	45.0312	81.8125
2017-12-14	06:30:00	48	33.875	48	21.4375	48	20.9375	48	55.125	48	56.6875
2017-12-14	07:00:00	44.5625	33.125	44.5625	21.6875	44.5625	18.375	44.5625	48.75	44.5625	71.4375
2017-12-14	07:30:00	50.5625	45.9375	50.5625	39.1875	50.5625	13.125	50.5625	51.25	50.5625	76.75
2017-12-14	08:00:00	50.0312	45.5625	50.0312	31.4375	50.0312	22.9375	50.0312	59.1875	50.0312	80.4375
2017-12-14	08:30:00	50.8438	60.875	50.8438	26.8125	50.8438	25.625	50.8438	51.3125	50.8438	70.5625
2017-12-14	09:00:00	49.5312	48.5	49.5312	37.0625	49.5312	37.9375	49.5312	57.0625	49.5312	64.1875
2017-12-14	09:30:00	47.0938	50.375	47.0938	36.5	47.0938	24.9375	47.0938	58.5	47.0938	61.4375
2017-12-14	10:00:00	48.875	51.1875	48.875	41.5625	48.875	36	48.875	53.25	48.875	54.25
2017-12-14	10:30:00	52.2188	56.1875	52.2188	35.625	52.2188	30.9375	52.2188	63.8125	52.2188	46.1875
2017-12-14	11:00:00	56.5938	55.125	56.5938	46.0625	56.5938	39.625	56.5938	56.625	56.5938	42.8125
2017-12-14	11:30:00	52.5938	57.1875	52.5938	45.6875	52.5938	29.9375	52.5938	57.4375	52.5938	22.125
2017-12-14	12:00:00	47.5625	56	47.5625	49.1875	47.5625	46	47.5625	54	47.5625	16.0625
2017-12-14	12:30:00	38.875	58.875	38.875	43.8125	38.875	37.625	38.875	38.0625	38.875	6
2017-12-14	13:00:00	32.9062	63.75	32.9062	51.1875	32.9062	37.8125	32.9062	41.625	32.9062	11.25
2017-12-14	13:30:00	34.375	59.875	34.375	50.8125	34.375	44.4375	34.375	25.375	34.375	9
2017-12-14	14:00:00	18.0938	48.25	18.0938	55.25	18.0938	43.5625	18.0938	27.375	18.0938	14.3125
2017-12-14	14:30:00	35.2188	54.75	35.2188	57.9375	35.2188	51.25	35.2188	41	35.2188	26.625
2017-12-14	15:00:00	13.125	29.5	13.125	65.625	13.125	49.4375	13.125	14.4375	13.125	8.9375
2017-12-14	15:30:00	8.09375	14.0625	8.09375	56.1875	8.09375	49	8.09375	8.625	8.09375	6
2017-12-14	16:00:00	13.0312	9.9375	13.0312	46.5	13.0312	51.3125	13.0312	5.625	13.0312	14.6875
2017-12-14	16:30:00	11.375	27.9375	11.375	26.6875	11.375	34.5	11.375	19.8125	11.375	14.75
2017-12-14	17:00:00	15.875	16	15.875	17.9375	15.875	18.8125	15.875	17.625	15.875	11.8125
2017-12-14	17:30:00	16.4375	9.875	16.4375	18.625	16.4375	8.9375	16.4375	11.4375	16.4375	20.8125
2017-12-14	18:00:00	11.6562	10.5625	11.6562	20	11.6562	3.6875	11.6562	9.75	11.6562	12.5625
2017-12-14	18:30:00	8.65625	10.625	8.65625	10	8.65625	4.5625	8.65625	11.125	8.65625	25.5
2017-12-14	19:00:00	14.0625	8.875	14.0625	7.1875	14.0625	1.3125	14.0625	14.4375	14.0625	26.0625
2017-12-14	19:30:00	10.8125	18.8125	10.8125	10.9375	10.8125	9.5	10.8125	18.375	10.8125	33.1875
2017-12-14	20:00:00	9.9375	12.625	9.9375	7.3125	9.9375	15.375	9.9375	14.75	9.9375	31.25
2017-12-14	20:30:00	20.7188	9.375	20.7188	9.625	20.7188	6.6875	20.7188	22.125	20.7188	18.6875
2017-12-14	21:00:00	17.0938	16.1875	17.0938	15	17.0938	4.375	17.0938	27.9375	17.0938	23.1875
2017-12-14	21:30:00	22.9375	5.6875	22.9375	8.4375	22.9375	8.0625	22.9375	20.5625	22.9375	25.25
2017-12-14	22:00:00	24.2188	15.25	24.2188	14.25	24.2188	14	24.2188	26.0625	24.2188	21.125
2017-12-14	22:30:00	28.4375	14.625	28.4375	8.0625	28.4375	13.6875	28.4375	27.25	28.4375	30.875
2017-12-14	23:00:00	26.2812	12.9375	26.2812	18.25	26.2812	3.875	26.2812	19.25	26.2812	33.5
2017-12-14	23:30:00	27.0625	13.4375	27.0625	15.6875	27.0625	8.875	27.0625	13.625	27.0625	22.75
2017-12-15	00:00:00	24.5	21.25	24.5	13.1875	24.5	5.375	24.5	15.8125	24.5	32.0625
2017-12-15	00:30:00	23.5312	23.5625	23.5312	18.8125	23.5312	8	23.5312	18.875	23.5312	16.5
2017-12-15	01:00:00	21.4062	11.8125	21.4062	24.75	21.4062	13.4375	21.4062	14.875	21.4062	35.1875
2017-12-15	01:30:00	16.9688	28.1875	16.9688	11.3125	16.9688	11.875	16.9688	27.1875	16.9688	21.125
2017-12-15	02:00:00	25.4688	17.875	25.4688	15	25.4688	21.1875	25.4688	10.75	25.4688	22
2017-12-15	02:30:00	18	28.375	18	16.3125	18	10.8125	18	22.8125	18	27.5
2017-12-15	03:00:00	18	20.625	18	25.125	18	13	18	10.9375	18	45.625
2017-12-15	03:30:00	23.875	13.875	23.875	29.3125	23.875	14.625	23.875	26.0625	23.875	39.0625
2017-12-15	04:00:00	31.4375	13.0625	31.4375	23.625	31.4375	21.0625	31.4375	36.4375	31.4375	52.0625
2017-12-15	04:30:00	28.875	14.75	28.875	17.1875	28.875	14.8125	28.875	25.5	28.875	55.875
2017-12-15	05:00:00	30.875	19.625	30.875	31.1875	30.875	18.3125	30.875	31.375	30.875	57.25
2017-12-15	05:30:00	45.7188	27.5625	45.7188	11.9375	45.7188	14.6875	45.7188	47	45.7188	52.3125
2017-12-15	06:00:00	40.75	19.875	40.75	11	40.75	20.75	40.75	41.25	40.75	54.25
2017-12-15	06:30:00	35.4062	25.75	35.4062	24.3125	35.4062	14.375	35.4062	39	35.4062	59.5
2017-12-15	07:00:00	47.125	32.5625	47.125	14.6875	47.125	15.75	47.125	43.5	47.125	63.375
2017-12-15	07:30:00	46.0312	30.375	46.0312	23.25	46.0312	12.9375	46.0312	45.3125	46.0312	61.5
2017-12-15	08:00:00	46.4062	36.4375	46.4062	23.875	46.4062	16.0625	46.4062	53.875	46.4062	56.5625
2017-12-15	08:30:00	45.4375	41.875	45.4375	26.375	45.4375	26.25	45.4375	50.1875	45.4375	71.5625
2017-12-15	09:00:00	48.9688	43	48.9688	26.625	48.9688	23.9375	48.9688	40.0625	48.9688	70.3125
2017-12-15	09:30:00	54.6562	44.4375	54.6562	35.4375	54.6562	20.6875	54.6562	55.875	54.6562	60.625
2017-12-15	10:00:00	47.5312	43.8125	47.5312	43.625	47.5312	15.875	47.5312	51.5625	47.5312	63.75
2017-12-15	10:30:00	51.3125	49.625	51.3125	40.5	51.3125	20.375	51.3125	52.625	51.3125	62.75
2017-12-15	11:00:00	51.0938	52.5	51.0938	41.3125	51.0938	29.75	51.0938	46.0625	51.0938	39.6875
2017-12-15	11:30:00	48.9688	46.3125	48.9688	36.3125	48.9688	40.6875	48.9688	52.25	48.9688	29.25
2017-12-15	12:00:00	51.0312	53	51.0312	42.8125	51.0312	36	51.0312	48.5625	51.0312	28.6875
2017-12-15	12:30:00	43.5625	54.4375	43.5625	49.3125	43.5625	39.6875	43.5625	39.375	43.5625	20.8125
2017-12-15	13:00:00	41.1875	55.625	41.1875	41.3125	41.1875	32.0625	41.1875	38.5625	41.1875	6.75
2017-12-15	13:30:00	26.7812	60.0625	26.7812	44.375	26.7812	39.0625	26.7812	26.875	26.7812	15.125
2017-12-15	14:00:00	18.0312	49.625	18.0312	54.375	18.0312	39.125	18.0312	35.5	18.0312	16.5625
2017-12-15	14:30:00	40.5625	63.5625	40.5625	51.3125	40.5625	51.4375	40.5625	41.5625	40.5625	23.5625
2017-12-15	15:00:00	15.9375	37	15.9375	55.0625	15.9375	46.5625	15.9375	29.9375	15.9375	16.125
2017-12-15	15:30:00	5.6875	31.625	5.6875	49.0625	5.6875	43.75	5.6875	13.8125	5.6875	18.9375
2017-12-15	16:00:00	13.1875	23.875	13.1875	48.8125	13.1875	42.125	13.1875	17.1875	13.1875	17.625
2017-12-15	16:30:00	6.40625	12.4375	6.40625	38.4375	6.40625	42.125	6.40625	19.4375	6.40625	7.25
2017-12-15	17:00:00	22.0625	11.3125	22.0625	31.1875	22.0625	30.125	22.0625	11.3125	22.0625	16.3125
2017-12-15	17:30:00	8.90625	15.625	8.90625	22.1875	8.90625	22.25	8.90625	14.375	8.90625	13.1875
2017-12-15	18:00:00	8.875	10.8125	8.875	18.375	8.875	17.9375	8.875	6.875	8.875	20.3125
2017-12-15	18:30:00	10.125	6.4375	10.125	12.8125	10.125	8.0625	10.125	9.4375	10.125	16.4375
2017-12-15	19:00:00	13.25	8.25	13.25	13.875	13.25	6.375	13.25	10.0625	13.25	28.0625
2017-12-15	19:30:00	15.7188	8.625	15.7188	5.375	15.7188	5.0625	15.7188	12.75	15.7188	19.375
2017-12-15	20:00:00	11.6875	9.625	11.6875	11.125	11.6875	5.75	11.6875	20.5625	11.6875	14.6875
2017-12-15	20:30:00	10.25	7.4375	10.25	20.375	10.25	9.625	10.25	16	10.25	23
2017-12-15	21:00:00	12.9062	15.8125	12.9062	17.75	12.9062	8.25	12.9062	21.5625	12.9062	23.1875
2017-12-15	21:30:00	21.875	11.75	21.875	3.0625	21.875	5.0625	21.875	18.25	21.875	26.875
2017-12-15	22:00:00	15.375	7.125	15.375	12.3125	15.375	8.5625	15.375	17.6875	15.375	15.3125
2017-12-15	22:30:00	21.1875	8.5	21.1875	16.3125	21.1875	7.6875	21.1875	26.5	21.1875	16.625
2017-12-15	23:00:00	20.0938	18.8125	20.0938	9.4375	20.0938	10.4375	20.0938	15.1875	20.0938	19.1875
2017-12-15	23:30:00	17.3438	12.0625	17.3438	16.5	17.3438	7	17.3438	15.5625	17.3438	23.75
2017-12-16	00:00:00	24.3125	18.9375	24.3125	22.125	24.3125	9.6875	24.3125	18.6875	24.3125	22.3125
2017-12-16	00:30:00	21.1562	17.0625	21.1562	16.875	21.1562	7.125	21.1562	14.3125	21.1562	20.5
2017-12-16	01:00:00	15.4688	13.5	15.4688	11.375	15.4688	7.1875	15.4688	17.75	15.4688	26.125
2017-12-16	01:30:00	21.25	13.1875	21.25	13.375	21.25	8.6875	21.25	22.375	21.25	21.875
2017-12-16	02:00:00	19	24.75	19	20.375	19	7.75	19	18.1875	19	34.1875
2017-12-16	02:30:00	21.9375	19.75	21.9375	26.5625	21.9375	8.5625	21.9375	23.3125	21.9375	31.25
2017-12-16	03:00:00	19.8438	11.625	19.8438	23.5625	19.8438	11.6875	19.8438	15.6875	19.8438	40.125
2017-12-16	03:30:00	20.7188	16	20.7188	15.8125	20.7188	12.875	20.7188	16	20.7188	33.875
2017-12-16	04:00:00	18.75	18.375	18.75	13.5625	18.75	13.75	18.75	30.375	18.75	42.9375
2017-12-16	04:30:00	24.9062	20.6875	24.9062	19.3125	24.9062	17.1875	24.9062	28.1875	24.9062	43.75
2017-12-16	05:00:00	30.9375	19.375	30.9375	18.25	30.9375	13.875	30.9375	36.3125	30.9375	51.9375
2017-12-16	05:30:00	25.0625	18.5	25.0625	14.5625	25.0625	14.3125	25.0625	42.25	25.0625	51.375
2017-12-16	06:00:00	37.3125	12.5625	37.3125	16.25	37.3125	13.3125	37.3125	40.1875	37.3125	47.5
2017-12-16	06:30:00	43.5	25.375	43.5	16.6875	43.5	19	43.5	33.5625	43.5	59.125
2017-12-16	07:00:00	39.2188	28.4375	39.2188	20.25	39.2188	9.375	39.2188	40.8125	39.2188	58.5
2017-12-16	07:30:00	45.8125	29.125	45.8125	17.6875	45.8125	21.875	45.8125	50.6875	45.8125	50.375
2017-12-16	08:00:00	37.5	41	37.5	25.875	37.5	23.25	37.5	36.5625	37.5	57
2017-12-16	08:30:00	43.8125	32.5	43.8125	29.375	43.8125	6.25	43.8125	50.5625	43.8125	53.75
2017-12-16	09:00:00	39.8438	44.5625	39.8438	27.625	39.8438	14.375	39.8438	45.625	39.8438	64.625
2017-12-16	09:30:00	46.6875	31.6875	46.6875	27.625	46.6875	13.625	46.6875	48.5	46.6875	61.5
2017-12-16	10:00:00	42.5312	46.4375	42.5312	25.5	42.5312	12.25	42.5312	50.625	42.5312	66.3125
2017-12-16	10:30:00	45.1562	42.9375	45.1562	36.625	45.1562	28.3125	45.1562	46.375	45.1562	51.75
2017-12-16	11:00:00	46.3438	43.125	46.3438	33.3125	46.3438	30.375	46.3438	48.375	46.3438	36.3125
2017-12-16	11:30:00	47.7812	42.0625	47.7812	42.4375	47.7812	16.8125	47.7812	41.9375	47.7812	35.375
2017-12-16	12:00:00	41.75	44.9375	41.75	42.4375	41.75	38.1875	41.75	37.8125	41.75	31.1875
2017-12-16	12:30:00	44.6875	50.3125	44.6875	38.4375	44.6875	33.5625	44.6875	39.375	44.6875	20.125
2017-12-16	13:00:00	36	49.625	36	44.1875	36	39.3125	36	25.625	36	21
2017-12-16	13:30:00	32.4062	53.4375	32.4062	41.1875	32.4062	36.8125	32.4062	32.5	32.4062	8.0625
2017-12-16	14:00:00	23.1875	52.9375	23.1875	50.9375	23.1875	41.3125	23.1875	28.875	23.1875	26.5625
2017-12-16	14:30:00	40.3438	56.6875	40.3438	48.4375	40.3438	50.25	40.3438	33	40.3438	19.5
2017-12-16	15:00:00	16.8125	45.5	16.8125	51.0625	16.8125	44.5625	16.8125	17	16.8125	3.75
2017-12-16	15:30:00	12.4375	37.625	12.4375	45.9375	12.4375	46	12.4375	12.1875	12.4375	3.875
2017-12-16	16:00:00	6.09375	34.875	6.09375	44.8125	6.09375	55.4375	6.09375	21.375	6.09375	15.375
2017-12-16	16:30:00	7.09375	15.0625	7.09375	45.6875	7.09375	51.875	7.09375	12.1875	7.09375	16
2017-12-16	17:00:00	16.25	10.9375	16.25	36	16.25	47.375	16.25	12.125	16.25	8.5625
2017-12-16	17:30:00	10.0938	15.375	10.0938	37.1875	10.0938	32.4375	10.0938	14.4375	10.0938	11.0625
2017-12-16	18:00:00	14.3125	14.0625	14.3125	23.625	14.3125	34.1875	14.3125	17.875	14.3125	8.8125
2017-12-16	18:30:00	4.75	13.875	4.75	17.25	4.75	29.125	4.75	7.125	4.75	7.75
2017-12-16	19:00:00	16.5	9	16.5	16.625	16.5	19	16.5	14.625	16.5	10.125
2017-12-16	19:30:00	7.15625	11.125	7.15625	18.6875	7.15625	10.25	7.15625	13.375	7.15625	28.625
2017-12-16	20:00:00	8.4375	17.3125	8.4375	8.1875	8.4375	4.375	8.4375	14.75	8.4375	18.8125
2017-12-16	20:30:00	15	4.625	15	15.25	15	9.4375	15	18.4375	15	31.875
2017-12-16	21:00:00	16.9688	7.75	16.9688	7.9375	16.9688	9.75	16.9688	17.9375	16.9688	20.6875
2017-12-16	21:30:00	14.6875	7.5	14.6875	5	14.6875	4.125	14.6875	18.25	14.6875	22.5625
2017-12-16	22:00:00	16.3125	11.25	16.3125	8.9375	16.3125	8.75	16.3125	19.75	16.3125	15.8125
2017-12-16	22:30:00	15.3125	12.25	15.3125	9.0625	15.3125	14.3125	15.3125	14.125	15.3125	28.8125
2017-12-16	23:00:00	22.5938	13.25	22.5938	13.8125	22.5938	1.625	22.5938	24.5	22.5938	30.1875
2017-12-16	23:30:00	15.7188	14.5625	15.7188	12.3125	15.7188	3.3125	15.7188	13.75	15.7188	21.4375
2017-12-17	00:00:00	19.625	7	19.625	13.6875	19.625	10.6875	19.625	14.4375	19.625	22.75
2017-12-17	00:30:00	20.3438	13.875	20.3438	16.5625	20.3438	8.9375	20.3438	22.6875	20.3438	9
2017-12-17	01:00:00	15.0625	15.375	15.0625	12.5625	15.0625	11.9375	15.0625	6.8125	15.0625	17.1875
2017-12-17	01:30:00	19.4688	27.4375	19.4688	13.375	19.4688	9.5	19.4688	27.9375	19.4688	28.4375
2017-12-17	02:00:00	18	14.0625	18	14.625	18	0.5	18	21.875	18	27.75
2017-12-17	02:30:00	14.875	18.6875	14.875	30.5625	14.875	9.9375	14.875	15.25	14.875	19.5625
2017-12-17	03:00:00	27.6875	20.875	27.6875	7.9375	27.6875	8.875	27.6875	12.75	27.6875	37.25
2017-12-17	03:30:00	18.6562	8.5	18.6562	23.375	18.6562	10.625	18.6562	29.25	18.6562	24.5625
2017-12-17	04:00:00	14.2812	20.5	14.2812	19.625	14.2812	10.9375	14.2812	21.9375	14.2812	43.5
2017-12-17	04:30:00	16.625	13.3125	16.625	20.1875	16.625	17.3125	16.625	36.3125	16.625	36.625
2017-12-17	05:00:00	26.5625	27.5	26.5625	15.4375	26.5625	10	26.5625	34.6875	26.5625	28.625
2017-12-17	05:30:00	31.8438	16.375	31.8438	19.4375	31.8438	20.5	31.8438	32.875	31.8438	57.5625
2017-12-17	06:00:00	33.7188	11.8125	33.7188	14.6875	33.7188	11	33.7188	38.25	33.7188	46.75
2017-12-17	06:30:00	33.6875	17	33.6875	21	33.6875	19.1875	33.6875	29.75	33.6875	54.5625
2017-12-17	07:00:00	40.1875	18.5625	40.1875	12.9375	40.1875	13.875	40.1875	45.75	40.1875	51.5625
2017-12-17	07:30:00	40.625	31.8125	40.625	14.3125	40.625	10.6875	40.625	36.5	40.625	54.375
2017-12-17	08:00:00	37.5625	31.75	37.5625	23.1875	37.5625	16.875	37.5625	41.375	37.5625	52.375
2017-12-17	08:30:00	43.0938	17.5	43.0938	24.75	43.0938	8.8125	43.0938	40.8125	43.0938	52.6875
2017-12-17	09:00:00	42.4062	33.6875	42.4062	13.5	42.4062	10.0625	42.4062	37	42.4062	54.9375
2017-12-17	09:30:00	38.0938	32.3125	38.0938	23.25	38.0938	9.9375	38.0938	46.5	38.0938	57.1875
2017-12-17	10:00:00	42.5938	37.5	42.5938	22.3125	42.5938	26.5	42.5938	38.4375	42.5938	56.125
2017-12-17	10:30:00	37.9688	37.1875	37.9688	29.75	37.9688	16.9375	37.9688	39.0625	37.9688	47.6875
2017-12-17	11:00:00	44.5	40.875	44.5	36.625	44.5	12.1875	44.5	37	44.5	40.8125
2017-12-17	11:30:00	41.4688	38.8125	41.4688	30.375	41.4688	25.375	41.4688	38.375	41.4688	28.5625
2017-12-17	12:00:00	41.4062	44.75	41.4062	41.4375	41.4062	29.375	41.4062	36.9375	41.4062	35.125
2017-12-17	12:30:00	37.625	55.8125	37.625	43.6875	37.625	28.4375	37.625	34.375	37.625	22.3125
2017-12-17	13:00:00	41.1875	42.5	41.1875	41.4375	41.1875	38	41.1875	37.25	41.1875	21.625
2017-12-17	13:30:00	31	45.4375	31	39.5	31	34.9375	31	23.75	31	9.625
2017-12-17	14:00:00	23.9688	41.4375	23.9688	38.375	23.9688	33.625	23.9688	21.3125	23.9688	14.875
2017-12-17	14:30:00	39.0312	59	39.0312	48.5625	39.0312	41.5625	39.0312	31.9375	39.0312	32.5625
2017-12-17	15:00:00	16.75	42.375	16.75	43.5625	16.75	34.875	16.75	14.625	16.75	11.5
2017-12-17	15:30:00	19.125	33.5625	19.125	43.875	19.125	41.8125	19.125	21.875	19.125	5.3125
2017-12-17	16:00:00	10.7812	34.9375	10.7812	40.5625	10.7812	37.75	10.7812	19.9375	10.7812	7.0625
2017-12-17	16:30:00	11.9375	19.875	11.9375	39.5	11.9375	37.9375	11.9375	13.875	11.9375	5.3125
2017-12-17	17:00:00	10.2812	20.8125	10.2812	35.1875	10.2812	41.125	10.2812	15.6875	10.2812	10.6875
2017-12-17	17:30:00	8.375	14.4375	8.375	35.0625	8.375	34.75	8.375	10.5	8.375	23.875
2017-12-17	18:00:00	11.4375	13.9375	11.4375	23.875	11.4375	23.5625	11.4375	10.4375	11.4375	7.6875
2017-12-17	18:30:00	5.15625	22.3125	5.15625	20.9375	5.15625	17.625	5.15625	8.9375	5.15625	11.75
2017-12-17	19:00:00	7.5625	5.6875	7.5625	14.8125	7.5625	18.1875	7.5625	11.6875	7.5625	6.75
2017-12-17	19:30:00	6.71875	3.125	6.71875	16.6875	6.71875	18.8125	6.71875	16.6875	6.71875	30.6875
2017-12-17	20:00:00	9.875	13.3125	9.875	13.3125	9.875	8.0625	9.875	14.6875	9.875	24.375
2017-12-17	20:30:00	13.4062	22.8125	13.4062	9.875	13.4062	10.25	13.4062	20.375	13.4062	28.5
2017-12-17	21:00:00	20.5	15.9375	20.5	16.5	20.5	13.125	20.5	25.9375	20.5	24.625
2017-12-17	21:30:00	16.2812	3.9375	16.2812	21.6875	16.2812	6.875	16.2812	21.1875	16.2812	23.625
2017-12-17	22:00:00	15.2188	11.4375	15.2188	13.6875	15.2188	13.1875	15.2188	15.3125	15.2188	24.125
2017-12-17	22:30:00	19.4375	2.5	19.4375	10.375	19.4375	8.5	19.4375	16.75	19.4375	15.5625
2017-12-17	23:00:00	19.6562	14.3125	19.6562	13.25	19.6562	4.625	19.6562	5.5625	19.6562	14.625
2017-12-17	23:30:00	17.875	5.3125	17.875	12.5	17.875	4.9375	17.875	20.5625	17.875	15.6875
2017-12-18	00:00:00	16.25	17.8125	16.25	18.75	16.25	2.625	16.25	15.5625	16.25	17.8125
2017-12-18	00:30:00	16.2812	14	16.2812	10	16.2812	1.75	16.2812	9.8125	16.2812	15.5625
2017-12-18	01:00:00	14.6562	19.875	14.6562	18.75	14.6562	7.6875	14.6562	15.375	14.6562	19.5625
2017-12-18	01:30:00	22.8438	10.8125	22.8438	18.4375	22.8438	9.875	22.8438	21.8125	22.8438	20.25
2017-12-18	02:00:00	11.8125	17.4375	11.8125	11.25	11.8125	5.375	11.8125	13.375	11.8125	30.5625
2017-12-18	02:30:00	19.7188	18.3125	19.7188	9.1875	19.7188	5.75	19.7188	12.375	19.7188	27.3125
2017-12-18	03:00:00	19.9062	14.875	19.9062	11.75	19.9062	10.75	19.9062	28.75	19.9062	19.5
2017-12-18	03:30:00	15.875	14.375	15.875	24.5625	15.875	6.625	15.875	19	15.875	35.5
2017-12-18	04:00:00	17.6875	20.3125	17.6875	26.3125	17.6875	12.5625	17.6875	29.0625	17.6875	32.375
2017-12-18	04:30:00	21.7188	16.8125	21.7188	13.75	21.7188	15.5	21.7188	30.3125	21.7188	48.4375
2017-12-18	05:00:00	24.5938	19.875	24.5938	14.9375	24.5938	11.9375	24.5938	21.5	24.5938	36.75
2017-12-18	05:30:00	22.4688	11.9375	22.4688	18.3125	22.4688	12.6875	22.4688	30.625	22.4688	42.5
2017-12-18	06:00:00	30	20.25	30	14.125	30	10.8125	30	29.8125	30	44.875
2017-12-18	06:30:00	34.0312	21.625	34.0312	20.875	34.0312	4	34.0312	42.0625	34.0312	37.5625
2017-12-18	07:00:00	26.2812	19.9375	26.2812	12.75	26.2812	15	26.2812	31.1875	26.2812	50.8125
2017-12-18	07:30:00	38.3438	27	38.3438	20.875	38.3438	13.75	38.3438	39.6875	38.3438	54
2017-12-18	08:00:00	37.8438	31.1875	37.8438	21.3125	37.8438	18.5625	37.8438	37.0625	37.8438	44.75
2017-12-18	08:30:00	35.6562	28.9375	35.6562	22	35.6562	16.375	35.6562	36.4375	35.6562	49.125
2017-12-18	09:00:00	34.2812	26.5	34.2812	28.9375	34.2812	10.875	34.2812	41.75	34.2812	49.375
2017-12-18	09:30:00	42.25	29.875	42.25	22.4375	42.25	13.6875	42.25	35	42.25	59.6875
2017-12-18	10:00:00	36.4688	36.8125	36.4688	24.3125	36.4688	25.125	36.4688	36.0625	36.4688	52
2017-12-18	10:30:00	41.5625	33.375	41.5625	26.125	41.5625	12.6875	41.5625	33.3125	41.5625	50.5
2017-12-18	11:00:00	43.2188	38.125	43.2188	32.8125	43.2188	16.3125	43.2188	41.9375	43.2188	37.375
2017-12-18	11:30:00	39.375	35.75	39.375	27.1875	39.375	23	39.375	40.9375	39.375	35.5
2017-12-18	12:00:00	34.9688	42.5625	34.9688	34.0625	34.9688	14.375	34.9688	39.625	34.9688	30.375
2017-12-18	12:30:00	32.6562	42.8125	32.6562	37.8125	32.6562	19.5625	32.6562	26.875	32.6562	26.875
2017-12-18	13:00:00	28.8438	42.5625	28.8438	38.8125	28.8438	31.8125	28.8438	26.75	28.8438	17.5625
2017-12-18	13:30:00	25.7188	40.375	25.7188	48.25	25.7188	29.25	25.7188	30.8125	25.7188	25.9375
2017-12-18	14:00:00	31.5312	46.1875	31.5312	36.125	31.5312	28.0625	31.5312	26.3125	31.5312	8.875
2017-12-18	14:30:00	40.0625	47.5625	40.0625	55	40.0625	43.75	40.0625	29.4375	40.0625	38.625
2017-12-18	15:00:00	16	44.6875	16	41.9375	16	34.875	16	16.8125	16	7.75
2017-12-18	15:30:00	16.0312	34.9375	16.0312	46.375	16.0312	34.0625	16.0312	14.375	16.0312	7.8125
2017-12-18	16:00:00	11.8125	32.375	11.8125	41.4375	11.8125	30.0625	11.8125	12.625	11.8125	12.125
2017-12-18	16:30:00	10.9688	21.625	10.9688	38.625	10.9688	29.125	10.9688	6.5625	10.9688	9.3125
2017-12-18	17:00:00	9.84375	26.25	9.84375	30.875	9.84375	25.5	9.84375	16	9.84375	3.8125
2017-12-18	17:30:00	13.1875	13.875	13.1875	31.875	13.1875	31.0625	13.1875	12.9375	13.1875	7.125
2017-12-18	18:00:00	8.375	14.125	8.375	26.75	8.375	20.625	8.375	7.4375	8.375	9.25
2017-12-18	18:30:00	5.3125	14.125	5.3125	26.25	5.3125	23.0625	5.3125	18.6875	5.3125	12.25
2017-12-18	19:00:00	8.96875	7.5	8.96875	27.1875	8.96875	19.75	8.96875	12.6875	8.96875	13.75
2017-12-18	19:30:00	10	16.6875	10	16.6875	10	8.6875	10	23.0625	10	20.875
2017-12-18	20:00:00	10.9688	13.5625	10.9688	15.4375	10.9688	12.3125	10.9688	12	10.9688	19.125
2017-12-18	20:30:00	9.78125	7.3125	9.78125	9.25	9.78125	5.625	9.78125	15.375	9.78125	23.4375
2017-12-18	21:00:00	11.375	7.0625	11.375	15.6875	11.375	4.25	11.375	14.125	11.375	18.5625
2017-12-18	21:30:00	16.5625	4.0625	16.5625	8	16.5625	4.5	16.5625	26.5	16.5625	23.625
2017-12-18	22:00:00	15.0625	14.0625	15.0625	12.75	15.0625	13.875	15.0625	15.6875	15.0625	14.5625
2017-12-18	22:30:00	16.7188	2.125	16.7188	10.5	16.7188	14.6875	16.7188	9.5	16.7188	19.3125
2017-12-18	23:00:00	21.0625	13.9375	21.0625	10	21.0625	4.25	21.0625	11.3125	21.0625	14.5625
2017-12-18	23:30:00	22.1875	10.0625	22.1875	12.8125	22.1875	3.0625	22.1875	11.75	22.1875	17.1875

## Sheet: RNAi 1
Graphs show behavior in DD
LD: 7-Dec-17 to 12-Dec-17
DD: 13-Dec-17 to 18-Dec-17
PsiRNAiKK/+
	Time	No Light Pulse	ZT13 Pulse	No Light Pulse	ZT15 Pulse	No Light Pulse	ZT17 Pulse	No Light Pulse	ZT19 Pulse	No Light Pulse	ZT21 Pulse
2017-12-07	00:00:00	32.8125	30.5625	32.8125	53.9375	32.8125	47.1875	32.8125	42.1875	32.8125	45.9375
2017-12-07	00:30:00	36.1875	29.5625	36.1875	46.75	36.1875	47.375	36.1875	36.0625	36.1875	37.9375
2017-12-07	01:00:00	31.5938	20.625	31.5938	34.375	31.5938	37.125	31.5938	30.125	31.5938	33.5625
2017-12-07	01:30:00	26.8125	11.8125	26.8125	25.3125	26.8125	29.125	26.8125	22.375	26.8125	17.5
2017-12-07	02:00:00	21.0938	10.625	21.0938	17.75	21.0938	24.75	21.0938	15.8125	21.0938	10.5625
2017-12-07	02:30:00	20.9375	7.6875	20.9375	16.6875	20.9375	19.6875	20.9375	16.625	20.9375	13
2017-12-07	03:00:00	16.8438	2	16.8438	7.5	16.8438	19	16.8438	11.75	16.8438	7.8125
2017-12-07	03:30:00	6.3125	1.125	6.3125	1.875	6.3125	7	6.3125	2.5625	6.3125	4.5
2017-12-07	04:00:00	6.15625	0.75	6.15625	1.6875	6.15625	5.3125	6.15625	4.25	6.15625	5.8125
2017-12-07	04:30:00	7.4375	4.375	7.4375	1.4375	7.4375	2.0625	7.4375	2.1875	7.4375	1.5
2017-12-07	05:00:00	8	2	8	0.9375	8	1.6875	8	6.4375	8	5.25
2017-12-07	05:30:00	4.78125	2.8125	4.78125	4.875	4.78125	1.0625	4.78125	2.875	4.78125	2.6875
2017-12-07	06:00:00	5.84375	2.25	5.84375	1.8125	5.84375	0.375	5.84375	3.3125	5.84375	3.3125
2017-12-07	06:30:00	4.625	3.5	4.625	0.125	4.625	0.5	4.625	7.125	4.625	4.25
2017-12-07	07:00:00	8.09375	1.1875	8.09375	1.5	8.09375	1.9375	8.09375	6.125	8.09375	4.6875
2017-12-07	07:30:00	2.78125	1.9375	2.78125	2.75	2.78125	2.1875	2.78125	3.0625	2.78125	3.0625
2017-12-07	08:00:00	1.71875	4.5	1.71875	3.4375	1.71875	5.5	1.71875	7.375	1.71875	7.1875
2017-12-07	08:30:00	1.90625	1.625	1.90625	2.9375	1.90625	0.4375	1.90625	7.5625	1.90625	2.9375
2017-12-07	09:00:00	2.84375	1	2.84375	1	2.84375	1	2.84375	6.4375	2.84375	4.4375
2017-12-07	09:30:00	3.1875	0.5625	3.1875	0.6875	3.1875	0.75	3.1875	4.875	3.1875	4.4375
2017-12-07	10:00:00	4.4375	0.6875	4.4375	0.1875	4.4375	0.75	4.4375	6.375	4.4375	2.625
2017-12-07	10:30:00	75.1875	77.75	75.1875	66.75	75.1875	75.75	75.1875	61	75.1875	69.875
2017-12-07	11:00:00	5.15625	1.8125	5.15625	3.625	5.15625	3.875	5.15625	3.125	5.15625	9.125
2017-12-07	11:30:00	1.15625	0.625	1.15625	0.25	1.15625	0.5625	1.15625	0.125	1.15625	1.25
2017-12-07	12:00:00	0.5	0.25	0.5	0.25	0.5	0.875	0.5	1.3125	0.5	2.1875
2017-12-07	12:30:00	0.71875	0.0625	0.71875	0.3125	0.71875	2.8125	0.71875	2.4375	0.71875	0
2017-12-07	13:00:00	1.0625	0	1.0625	0.5	1.0625	0.875	1.0625	0	1.0625	0
2017-12-07	13:30:00	2.625	0.1875	2.625	0.625	2.625	1.875	2.625	2.5625	2.625	0.3125
2017-12-07	14:00:00	1.9375	0.125	1.9375	1	1.9375	2.0625	1.9375	1.9375	1.9375	0.0625
2017-12-07	14:30:00	7.875	1.25	7.875	0.6875	7.875	2.125	7.875	2.3125	7.875	2.25
2017-12-07	15:00:00	3.125	0.3125	3.125	2.875	3.125	5	3.125	2.0625	3.125	1.875
2017-12-07	15:30:00	4.28125	2.6875	4.28125	3.375	4.28125	1.1875	4.28125	4.5	4.28125	2
2017-12-07	16:00:00	3.625	1	3.625	2.6875	3.625	2.75	3.625	1.25	3.625	0
2017-12-07	16:30:00	1.75	0.0625	1.75	1.25	1.75	2.5625	1.75	1.25	1.75	2.375
2017-12-07	17:00:00	5.34375	3.5625	5.34375	1.6875	5.34375	2.0625	5.34375	5.125	5.34375	1.625
2017-12-07	17:30:00	5.46875	1.875	5.46875	0.5625	5.46875	3.125	5.46875	1.1875	5.46875	1.9375
2017-12-07	18:00:00	7.59375	2.875	7.59375	1.8125	7.59375	3.1875	7.59375	0.4375	7.59375	6.3125
2017-12-07	18:30:00	5.03125	9.125	5.03125	11.125	5.03125	6.625	5.03125	9.1875	5.03125	8.9375
2017-12-07	19:00:00	4.125	3.3125	4.125	8.0625	4.125	6.4375	4.125	7.3125	4.125	8.375
2017-12-07	19:30:00	4.8125	5.25	4.8125	14.625	4.8125	6.4375	4.8125	5.5	4.8125	14
2017-12-07	20:00:00	18.6562	13.3125	18.6562	8.875	18.6562	8.5625	18.6562	15.4375	18.6562	8.6875
2017-12-07	20:30:00	13.5312	12.375	13.5312	20.8125	13.5312	10.8125	13.5312	18.0625	13.5312	8.9375
2017-12-07	21:00:00	13.3438	7.0625	13.3438	17.25	13.3438	14.5625	13.3438	10.75	13.3438	30.75
2017-12-07	21:30:00	15.6562	23	15.6562	10.5625	15.6562	15.875	15.6562	14.375	15.6562	17.3125
2017-12-07	22:00:00	25.9062	15.8125	25.9062	22.0625	25.9062	12.875	25.9062	11.9375	25.9062	12.5625
2017-12-07	22:30:00	57.8125	60.8125	57.8125	59.0625	57.8125	40.9375	57.8125	43.5	57.8125	56.1875
2017-12-07	23:00:00	14.5	22.8125	14.5	16.875	14.5	6.0625	14.5	14.4375	14.5	20.9375
2017-12-07	23:30:00	8.1875	6.9375	8.1875	3.25	8.1875	0.8125	8.1875	8	8.1875	5.0625
2017-12-08	00:00:00	3.09375	0	3.09375	1.4375	3.09375	3.4375	3.09375	4.1875	3.09375	2.75
2017-12-08	00:30:00	2.375	0.1875	2.375	1.25	2.375	0.1875	2.375	5.5625	2.375	0.75
2017-12-08	01:00:00	1.125	0	1.125	0.375	1.125	1.25	1.125	1.8125	1.125	1
2017-12-08	01:30:00	0.9375	0	0.9375	1.8125	0.9375	0	0.9375	1.0625	0.9375	2.5
2017-12-08	02:00:00	0	0	0	2.0625	0	0	0	1.625	0	0
2017-12-08	02:30:00	2.0625	0	2.0625	1.125	2.0625	0	2.0625	2.9375	2.0625	0
2017-12-08	03:00:00	0.59375	0	0.59375	0	0.59375	0	0.59375	1.0625	0.59375	1.1875
2017-12-08	03:30:00	0.875	0	0.875	0	0.875	0	0.875	0.1875	0.875	1.9375
2017-12-08	04:00:00	0.71875	0	0.71875	0.3125	0.71875	0	0.71875	1.9375	0.71875	2.6875
2017-12-08	04:30:00	0	0	0	0	0	0.1875	0	0.625	0	8.6875
2017-12-08	05:00:00	0.75	0	0.75	1.5625	0.75	0	0.75	5.125	0.75	3.9375
2017-12-08	05:30:00	2.6875	0	2.6875	1.0625	2.6875	0	2.6875	1.8125	2.6875	4.625
2017-12-08	06:00:00	10.125	0	10.125	2.8125	10.125	0.875	10.125	3.4375	10.125	14.4375
2017-12-08	06:30:00	13.3125	4	13.3125	15.375	13.3125	9.25	13.3125	3.625	13.3125	14.6875
2017-12-08	07:00:00	23	12.375	23	28.25	23	16.75	23	13.0625	23	30.5
2017-12-08	07:30:00	27.5	16.8125	27.5	31.8125	27.5	26.8125	27.5	20.9375	27.5	36.875
2017-12-08	08:00:00	47.5	36.625	47.5	48.625	47.5	43	47.5	31.8125	47.5	55.375
2017-12-08	08:30:00	63.0938	50.625	63.0938	69.625	63.0938	69.25	63.0938	54.625	63.0938	65.5625
2017-12-08	09:00:00	73.625	60.6875	73.625	74.9375	73.625	77.5	73.625	64.4375	73.625	71.5625
2017-12-08	09:30:00	81.125	68.5625	81.125	81.5	81.125	87.6875	81.125	72.375	81.125	79.75
2017-12-08	10:00:00	85.75	74.0625	85.75	81.5	85.75	88.8125	85.75	74.625	85.75	78.375
2017-12-08	10:30:00	69.4375	74.625	69.4375	65.9375	69.4375	68.0625	69.4375	70.625	69.4375	67.75
2017-12-08	11:00:00	1.875	2	1.875	5.4375	1.875	2.5	1.875	0.4375	1.875	4.0625
2017-12-08	11:30:00	1.8125	0	1.8125	1.4375	1.8125	0.125	1.8125	0.125	1.8125	1.375
2017-12-08	12:00:00	0.53125	0.0625	0.53125	0	0.53125	0.4375	0.53125	0.25	0.53125	0.9375
2017-12-08	12:30:00	0.6875	0.0625	0.6875	0.6875	0.6875	0.375	0.6875	0.0625	0.6875	0.0625
2017-12-08	13:00:00	0.03125	0.5625	0.03125	0	0.03125	0.125	0.03125	0.625	0.03125	0.1875
2017-12-08	13:30:00	0.3125	0.0625	0.3125	0.25	0.3125	0	0.3125	0.375	0.3125	0.25
2017-12-08	14:00:00	0.5625	0.125	0.5625	0.75	0.5625	1.6875	0.5625	0.3125	0.5625	0.6875
2017-12-08	14:30:00	0.96875	0.6875	0.96875	1.875	0.96875	1.625	0.96875	0.3125	0.96875	0.375
2017-12-08	15:00:00	1.71875	0.5625	1.71875	0.1875	1.71875	0	1.71875	2.5625	1.71875	1.3125
2017-12-08	15:30:00	1.65625	0.5625	1.65625	1.1875	1.65625	0.0625	1.65625	0.8125	1.65625	1.5625
2017-12-08	16:00:00	1.71875	0.0625	1.71875	0.5	1.71875	1.75	1.71875	0	1.71875	0.5
2017-12-08	16:30:00	2.125	1.875	2.125	0.0625	2.125	0.0625	2.125	0.125	2.125	0.625
2017-12-08	17:00:00	1.03125	0.375	1.03125	0.4375	1.03125	1.6875	1.03125	0.1875	1.03125	0.5625
2017-12-08	17:30:00	0.6875	1.875	0.6875	4.3125	0.6875	1.125	0.6875	0	0.6875	0.375
2017-12-08	18:00:00	2.9375	0.6875	2.9375	0.25	2.9375	0.4375	2.9375	0	2.9375	1.4375
2017-12-08	18:30:00	2	0.875	2	3.8125	2	0.0625	2	0	2	0.5
2017-12-08	19:00:00	2.4375	0	2.4375	2	2.4375	0.125	2.4375	0	2.4375	1.75
2017-12-08	19:30:00	4.5625	1.375	4.5625	1.125	4.5625	3.1875	4.5625	0.875	4.5625	3.9375
2017-12-08	20:00:00	4.40625	2.0625	4.40625	2.9375	4.40625	5	4.40625	6.0625	4.40625	6
2017-12-08	20:30:00	3.71875	10.4375	3.71875	10.25	3.71875	12.8125	3.71875	6.0625	3.71875	7.8125
2017-12-08	21:00:00	6.375	14.8125	6.375	16	6.375	4.125	6.375	4.625	6.375	6.1875
2017-12-08	21:30:00	16.5	26.0625	16.5	21.875	16.5	14.25	16.5	16.0625	16.5	11
2017-12-08	22:00:00	24.9062	18.625	24.9062	21	24.9062	18.25	24.9062	15.25	24.9062	21.4375
2017-12-08	22:30:00	74.0312	63.875	74.0312	52.8125	74.0312	59.1875	74.0312	57	74.0312	62.4375
2017-12-08	23:00:00	23.5	26.0625	23.5	11.6875	23.5	10.1875	23.5	25.5	23.5	14.375
2017-12-08	23:30:00	5.78125	2.75	5.78125	4.875	5.78125	6.9375	5.78125	6.75	5.78125	1.4375
2017-12-09	00:00:00	0.75	1	0.75	1.375	0.75	0	0.75	5.6875	0.75	5.375
2017-12-09	00:30:00	0	0	0	0.125	0	0	0	1.75	0	6.625
2017-12-09	01:00:00	0	0	0	0.4375	0	0	0	0.4375	0	0
2017-12-09	01:30:00	0	0	0	0	0	0	0	0	0	0
2017-12-09	02:00:00	0	0	0	0	0	0	0	0	0	0
2017-12-09	02:30:00	0	0	0	0	0	0.4375	0	0	0	0
2017-12-09	03:00:00	0.6875	0	0.6875	0	0.6875	0	0.6875	0.625	0.6875	0
2017-12-09	03:30:00	0.375	0	0.375	0	0.375	0	0.375	0.9375	0.375	0
2017-12-09	04:00:00	1.5	0	1.5	0	1.5	0.4375	1.5	0.3125	1.5	0
2017-12-09	04:30:00	0.03125	0	0.03125	0	0.03125	0.1875	0.03125	0.9375	0.03125	0
2017-12-09	05:00:00	0	0	0	0	0	0	0	0.1875	0	0
2017-12-09	05:30:00	0.28125	0	0.28125	0	0.28125	0	0.28125	1.1875	0.28125	0.125
2017-12-09	06:00:00	0	0	0	0	0	4.5	0	0.375	0	0.375
2017-12-09	06:30:00	0.46875	0	0.46875	0	0.46875	1.375	0.46875	0.9375	0.46875	0.3125
2017-12-09	07:00:00	2.625	0	2.625	0.375	2.625	0.875	2.625	0.125	2.625	3.3125
2017-12-09	07:30:00	7.25	0	7.25	5.25	7.25	9.375	7.25	1.9375	7.25	12.875
2017-12-09	08:00:00	13.7812	2.1875	13.7812	7.875	13.7812	16.25	13.7812	6.375	13.7812	19.6875
2017-12-09	08:30:00	26.9062	9.75	26.9062	18.125	26.9062	28.875	26.9062	17.3125	26.9062	31.25
2017-12-09	09:00:00	46.7188	30.9375	46.7188	38.5625	46.7188	42.8125	46.7188	37.4375	46.7188	45
2017-12-09	09:30:00	61	43.8125	61	61.75	61	62.6875	61	63.9375	61	56.625
2017-12-09	10:00:00	75.0938	58	75.0938	77.0625	75.0938	73.6875	75.0938	64.875	75.0938	63.5625
2017-12-09	10:30:00	73.0312	77.5	73.0312	75.875	73.0312	71.625	73.0312	77.375	73.0312	73.75
2017-12-09	11:00:00	5.34375	6.1875	5.34375	2.1875	5.34375	3.25	5.34375	1.0625	5.34375	3.9375
2017-12-09	11:30:00	0.0625	0	0.0625	0.25	0.0625	0.125	0.0625	0.1875	0.0625	0.1875
2017-12-09	12:00:00	0.625	0	0.625	0.9375	0.625	0.25	0.625	0.5	0.625	0.0625
2017-12-09	12:30:00	0.625	0	0.625	0	0.625	0.1875	0.625	0.125	0.625	0.25
2017-12-09	13:00:00	0.09375	0	0.09375	0	0.09375	0.0625	0.09375	0.125	0.09375	0.5
2017-12-09	13:30:00	0.125	0.1875	0.125	0	0.125	0.125	0.125	0.0625	0.125	0.3125
2017-12-09	14:00:00	0.03125	0.125	0.03125	0	0.03125	1.3125	0.03125	0.125	0.03125	0.75
2017-12-09	14:30:00	0.0625	1.4375	0.0625	0	0.0625	2.0625	0.0625	0.125	0.0625	0.375
2017-12-09	15:00:00	0.0625	0.8125	0.0625	0.6875	0.0625	2.625	0.0625	0.25	0.0625	0.5
2017-12-09	15:30:00	0	0.875	0	0.5	0	1.3125	0	0.1875	0	0.5625
2017-12-09	16:00:00	0.40625	2.1875	0.40625	0	0.40625	0.1875	0.40625	0.5625	0.40625	1.8125
2017-12-09	16:30:00	0.46875	2.875	0.46875	0	0.46875	0.5	0.46875	0.4375	0.46875	0.125
2017-12-09	17:00:00	0.9375	0.875	0.9375	0	0.9375	0.5	0.9375	1.9375	0.9375	0
2017-12-09	17:30:00	0.09375	0.375	0.09375	0.0625	0.09375	1.1875	0.09375	1.75	0.09375	0.5
2017-12-09	18:00:00	0.5	2.125	0.5	0	0.5	2.1875	0.5	1.4375	0.5	0.0625
2017-12-09	18:30:00	2.6875	0.625	2.6875	0	2.6875	0.3125	2.6875	2.1875	2.6875	0.75
2017-12-09	19:00:00	2.21875	0.6875	2.21875	1.125	2.21875	0.5	2.21875	1.875	2.21875	3.4375
2017-12-09	19:30:00	1.65625	5.4375	1.65625	4.125	1.65625	1.6875	1.65625	6.5	1.65625	6.1875
2017-12-09	20:00:00	4.40625	6.625	4.40625	8.0625	4.40625	3.6875	4.40625	3.0625	4.40625	4
2017-12-09	20:30:00	5.65625	1.8125	5.65625	9.1875	5.65625	4.1875	5.65625	4.5625	5.65625	13.4375
2017-12-09	21:00:00	11.1875	3.9375	11.1875	12.875	11.1875	6.125	11.1875	6.25	11.1875	17.1875
2017-12-09	21:30:00	14.8438	10.5	14.8438	16.4375	14.8438	5.6875	14.8438	9.8125	14.8438	21.8125
2017-12-09	22:00:00	25.1875	31.375	25.1875	40.6875	25.1875	18.4375	25.1875	14.1875	25.1875	29.0625
2017-12-09	22:30:00	77.7812	66	77.7812	68.0625	77.7812	67.4375	77.7812	62.6875	77.7812	58.0625
2017-12-09	23:00:00	25.3438	24.625	25.3438	17.75	25.3438	12.625	25.3438	21.125	25.3438	21.625
2017-12-09	23:30:00	8.4375	4.4375	8.4375	4.25	8.4375	3.625	8.4375	5.625	8.4375	7.375
2017-12-10	00:00:00	3.15625	0	3.15625	3.9375	3.15625	0.75	3.15625	1.125	3.15625	1.375
2017-12-10	00:30:00	1.875	0	1.875	1.8125	1.875	1.25	1.875	1.0625	1.875	2.5625
2017-12-10	01:00:00	0.71875	0	0.71875	0	0.71875	0.3125	0.71875	0.3125	0.71875	0.0625
2017-12-10	01:30:00	0.5625	0	0.5625	0	0.5625	0	0.5625	0.3125	0.5625	1.5
2017-12-10	02:00:00	0	0	0	0	0	0	0	0.25	0	0.25
2017-12-10	02:30:00	0	0	0	0.75	0	0	0	0.3125	0	0.625
2017-12-10	03:00:00	0.03125	0	0.03125	0	0.03125	0	0.03125	0	0.03125	0
2017-12-10	03:30:00	0	0	0	0	0	0	0	0.3125	0	0
2017-12-10	04:00:00	0	0	0	0	0	0	0	0	0	0.1875
2017-12-10	04:30:00	0	0	0	0	0	0	0	0	0	0.1875
2017-12-10	05:00:00	0	0	0	0	0	0	0	0.125	0	0.1875
2017-12-10	05:30:00	0	0	0	0	0	0.0625	0	2.25	0	0.3125
2017-12-10	06:00:00	0	0	0	0	0	0.25	0	1.25	0	2.625
2017-12-10	06:30:00	1.75	0	1.75	0	1.75	0.4375	1.75	2.4375	1.75	0.75
2017-12-10	07:00:00	3.46875	0	3.46875	0.5625	3.46875	2.125	3.46875	0.5	3.46875	2
2017-12-10	07:30:00	7.25	0	7.25	1.75	7.25	9.3125	7.25	2.125	7.25	6.375
2017-12-10	08:00:00	16.0938	0.375	16.0938	7.6875	16.0938	20	16.0938	8.75	16.0938	16.1875
2017-12-10	08:30:00	21.7188	13.375	21.7188	20.3125	21.7188	28	21.7188	15.4375	21.7188	26.3125
2017-12-10	09:00:00	42.5312	23.4375	42.5312	35.1875	42.5312	48.75	42.5312	40.5625	42.5312	39
2017-12-10	09:30:00	58.8125	52.875	58.8125	60.875	58.8125	64.9375	58.8125	48.125	58.8125	50.875
2017-12-10	10:00:00	71.6875	58.875	71.6875	72.625	71.6875	79.125	71.6875	67.1875	71.6875	66.6875
2017-12-10	10:30:00	67.5312	71.625	67.5312	71.625	67.5312	64.625	67.5312	69.6875	67.5312	62.8125
2017-12-10	11:00:00	3.125	6.8125	3.125	0.1875	3.125	0	3.125	0.25	3.125	3.8125
2017-12-10	11:30:00	0.0625	0	0.0625	0	0.0625	0	0.0625	0.375	0.0625	1.25
2017-12-10	12:00:00	1.125	0	1.125	0.3125	1.125	0	1.125	0	1.125	0
2017-12-10	12:30:00	0.65625	0	0.65625	0.0625	0.65625	0.0625	0.65625	0	0.65625	0
2017-12-10	13:00:00	0	0	0	0.0625	0	0.0625	0	0	0	0.3125
2017-12-10	13:30:00	0	0	0	0.0625	0	0	0	0.5625	0	0
2017-12-10	14:00:00	0	0	0	0	0	0.75	0	0.125	0	0
2017-12-10	14:30:00	0.53125	0.125	0.53125	0	0.53125	0.125	0.53125	0.125	0.53125	0
2017-12-10	15:00:00	0	0.25	0	0.3125	0	0.3125	0	0.8125	0	0
2017-12-10	15:30:00	0.125	0.375	0.125	0.6875	0.125	0.5625	0.125	1.125	0.125	0.75
2017-12-10	16:00:00	0.8125	0.1875	0.8125	0.625	0.8125	0.5625	0.8125	0	0.8125	0
2017-12-10	16:30:00	0	0.0625	0	0	0	0.875	0	0	0	0
2017-12-10	17:00:00	0	0.3125	0	0	0	0.0625	0	0	0	0
2017-12-10	17:30:00	0.03125	0	0.03125	0	0.03125	0.25	0.03125	0.1875	0.03125	0
2017-12-10	18:00:00	0.5	0.25	0.5	0.625	0.5	0.4375	0.5	0	0.5	0
2017-12-10	18:30:00	0.21875	0.25	0.21875	0	0.21875	0.25	0.21875	0	0.21875	0
2017-12-10	19:00:00	0.5625	0	0.5625	0.375	0.5625	1.875	0.5625	0	0.5625	0.125
2017-12-10	19:30:00	2.59375	0.1875	2.59375	9	2.59375	1.625	2.59375	1.625	2.59375	6.8125
2017-12-10	20:00:00	3	1	3	4.25	3	3.3125	3	3.5	3	1.8125
2017-12-10	20:30:00	7.875	4.125	7.875	3.375	7.875	5.0625	7.875	12.625	7.875	1.3125
2017-12-10	21:00:00	5.46875	7	5.46875	8.6875	5.46875	1	5.46875	2.125	5.46875	10.625
2017-12-10	21:30:00	11.875	8.5625	11.875	16.375	11.875	9.5	11.875	5.6875	11.875	14.3125
2017-12-10	22:00:00	26.9688	22.125	26.9688	19	26.9688	14.625	26.9688	19.6875	26.9688	24.375
2017-12-10	22:30:00	77.8438	66.25	77.8438	59	77.8438	52.4375	77.8438	59.875	77.8438	67.25
2017-12-10	23:00:00	31.8125	25	31.8125	19.5625	31.8125	12.4375	31.8125	20.4375	31.8125	17.3125
2017-12-10	23:30:00	9.46875	4.25	9.46875	10.3125	9.46875	3.875	9.46875	6.375	9.46875	4.375
2017-12-11	00:00:00	4.40625	0	4.40625	1.8125	4.40625	1.9375	4.40625	0.4375	4.40625	1.6875
2017-12-11	00:30:00	0.4375	0	0.4375	0.3125	0.4375	0	0.4375	0.5	0.4375	0.1875
2017-12-11	01:00:00	0.34375	0	0.34375	0.125	0.34375	0	0.34375	1	0.34375	0.3125
2017-12-11	01:30:00	0.125	0	0.125	0	0.125	0	0.125	0.3125	0.125	0
2017-12-11	02:00:00	0	0	0	0	0	0	0	1.4375	0	0
2017-12-11	02:30:00	0.5	0	0.5	0	0.5	0	0.5	2.8125	0.5	0
2017-12-11	03:00:00	0.5625	0	0.5625	0	0.5625	0	0.5625	0.0625	0.5625	0
2017-12-11	03:30:00	0	0	0	0.6875	0	0	0	1.4375	0	0
2017-12-11	04:00:00	0	0	0	0	0	0	0	1.375	0	0
2017-12-11	04:30:00	0	0	0	0	0	0	0	0	0	0
2017-12-11	05:00:00	0	0	0	0	0	0	0	0.25	0	0
2017-12-11	05:30:00	0	0	0	0	0	0	0	0	0	0
2017-12-11	06:00:00	0	0	0	0	0	0	0	0.375	0	0
2017-12-11	06:30:00	2.125	0	2.125	0	2.125	0.75	2.125	0	2.125	3.125
2017-12-11	07:00:00	5.375	0	5.375	0.5	5.375	4.1875	5.375	0	5.375	4.75
2017-12-11	07:30:00	10.0938	0.75	10.0938	12	10.0938	8.375	10.0938	2.5625	10.0938	12.875
2017-12-11	08:00:00	17.8438	3.0625	17.8438	13.9375	17.8438	12.5	17.8438	9.375	17.8438	23.1875
2017-12-11	08:30:00	25.9375	10.4375	25.9375	21.1875	25.9375	28.5625	25.9375	18.1875	25.9375	32.6875
2017-12-11	09:00:00	45.25	37.9375	45.25	41.25	45.25	47.4375	45.25	36.9375	45.25	48.9375
2017-12-11	09:30:00	59.1562	50.3125	59.1562	56.875	59.1562	66.8125	59.1562	54.25	59.1562	55.9375
2017-12-11	10:00:00	77.9375	65.375	77.9375	77.625	77.9375	77.6875	77.9375	63.125	77.9375	70.8125
2017-12-11	10:30:00	62.0625	61.25	62.0625	61.5625	62.0625	57.125	62.0625	64.1875	62.0625	54.625
2017-12-11	11:00:00	1.5625	5.8125	1.5625	0.125	1.5625	2.25	1.5625	0	1.5625	5.25
2017-12-11	11:30:00	1.4375	2.5625	1.4375	0.0625	1.4375	0.25	1.4375	0.0625	1.4375	1.8125
2017-12-11	12:00:00	0.53125	0	0.53125	0.125	0.53125	0	0.53125	0	0.53125	0
2017-12-11	12:30:00	1.03125	0.0625	1.03125	0.5	1.03125	0	1.03125	0.1875	1.03125	0
2017-12-11	13:00:00	0.4375	0.6875	0.4375	0	0.4375	0	0.4375	0.0625	0.4375	0
2017-12-11	13:30:00	0.28125	0.0625	0.28125	0.0625	0.28125	0	0.28125	0.3125	0.28125	0
2017-12-11	14:00:00	0.21875	0.0625	0.21875	0.25	0.21875	0.0625	0.21875	0.0625	0.21875	0
2017-12-11	14:30:00	0.09375	0.125	0.09375	0.75	0.09375	0.375	0.09375	1.25	0.09375	0.625
2017-12-11	15:00:00	0.03125	0.1875	0.03125	0.5	0.03125	0.125	0.03125	2.375	0.03125	0
2017-12-11	15:30:00	0.875	2.4375	0.875	0	0.875	0	0.875	0.1875	0.875	0.5625
2017-12-11	16:00:00	0.125	0.125	0.125	0	0.125	0	0.125	2.4375	0.125	0
2017-12-11	16:30:00	0.5625	0	0.5625	0	0.5625	0.125	0.5625	5.375	0.5625	0.0625
2017-12-11	17:00:00	0.78125	0.125	0.78125	0	0.78125	0	0.78125	0.5	0.78125	0.8125
2017-12-11	17:30:00	0.8125	0.125	0.8125	0.25	0.8125	0	0.8125	3.125	0.8125	0
2017-12-11	18:00:00	0.1875	0.0625	0.1875	0.6875	0.1875	0	0.1875	0.5	0.1875	0.4375
2017-12-11	18:30:00	0.125	0.25	0.125	0.125	0.125	0	0.125	0.0625	0.125	0
2017-12-11	19:00:00	1.96875	0.1875	1.96875	0	1.96875	0.6875	1.96875	0.1875	1.96875	0
2017-12-11	19:30:00	3.25	0.75	3.25	1.9375	3.25	0.4375	3.25	2	3.25	1.125
2017-12-11	20:00:00	1.25	5.1875	1.25	4.625	1.25	0.625	1.25	2.9375	1.25	3.1875
2017-12-11	20:30:00	7.40625	8.3125	7.40625	5.0625	7.40625	6.125	7.40625	0.625	7.40625	7.4375
2017-12-11	21:00:00	4.5625	7.25	4.5625	11.4375	4.5625	4.125	4.5625	9.6875	4.5625	4.25
2017-12-11	21:30:00	9.25	6.6875	9.25	7.375	9.25	3.125	9.25	5.0625	9.25	10.5
2017-12-11	22:00:00	20.0312	12.6875	20.0312	22.25	20.0312	16.0625	20.0312	15.6875	20.0312	30.3125
2017-12-11	22:30:00	68.1562	73	68.1562	54.5	68.1562	53.5	68.1562	45	68.1562	61.6875
2017-12-11	23:00:00	25.4688	27.25	25.4688	15.9375	25.4688	16.1875	25.4688	16.9375	25.4688	27.5625
2017-12-11	23:30:00	7.25	7.375	7.25	1.875	7.25	3.4375	7.25	8	7.25	4.75
2017-12-12	00:00:00	2.65625	1.1875	2.65625	2.625	2.65625	0	2.65625	0.5	2.65625	1.5
2017-12-12	00:30:00	1.46875	0	1.46875	1.375	1.46875	0	1.46875	0.3125	1.46875	0
2017-12-12	01:00:00	0.96875	0	0.96875	0.9375	0.96875	0	0.96875	0.125	0.96875	0
2017-12-12	01:30:00	0.09375	0	0.09375	0	0.09375	0	0.09375	0	0.09375	1.75
2017-12-12	02:00:00	0.75	0	0.75	0	0.75	0	0.75	0.0625	0.75	0.1875
2017-12-12	02:30:00	0.6875	0	0.6875	0	0.6875	0.9375	0.6875	0.3125	0.6875	0
2017-12-12	03:00:00	0	0	0	1	0	0	0	0.3125	0	0
2017-12-12	03:30:00	0	0	0	0.8125	0	0	0	0.1875	0	0
2017-12-12	04:00:00	0	0	0	0.25	0	0	0	0.8125	0	0
2017-12-12	04:30:00	0.25	0	0.25	0.625	0.25	0.875	0.25	0.1875	0.25	0
2017-12-12	05:00:00	0	0	0	0	0	0	0	2.3125	0	0
2017-12-12	05:30:00	0.375	0	0.375	0	0.375	0	0.375	0.5	0.375	0.0625
2017-12-12	06:00:00	1.21875	0	1.21875	0	1.21875	0	1.21875	1.375	1.21875	0.0625
2017-12-12	06:30:00	4.28125	0	4.28125	0.5	4.28125	1.375	4.28125	0.4375	4.28125	1.3125
2017-12-12	07:00:00	4.03125	0.1875	4.03125	2.625	4.03125	5.4375	4.03125	0.8125	4.03125	4.25
2017-12-12	07:30:00	6.90625	1.375	6.90625	8.375	6.90625	17.0625	6.90625	6.25	6.90625	17.0625
2017-12-12	08:00:00	16.0312	2.4375	16.0312	15.875	16.0312	24.75	16.0312	8.5	16.0312	35.75
2017-12-12	08:30:00	26.75	13.9375	26.75	34.1875	26.75	31.4375	26.75	25.0625	26.75	39.0625
2017-12-12	09:00:00	46.0625	36.9375	46.0625	41.6875	46.0625	47.3125	46.0625	41.25	46.0625	46.5
2017-12-12	09:30:00	62.5312	59.3125	62.5312	64	62.5312	65.8125	62.5312	55.5	62.5312	64
2017-12-12	10:00:00	75.4375	65.6875	75.4375	77.5625	75.4375	81.625	75.4375	61.8125	75.4375	72.125
2017-12-12	10:30:00	59.5938	52.4375	59.5938	46.375	59.5938	50.625	59.5938	52.625	59.5938	53.5625
2017-12-12	11:00:00	1.65625	3.0625	1.65625	0	1.65625	0.6875	1.65625	0	1.65625	6.8125
2017-12-12	11:30:00	1.59375	0	1.59375	0.125	1.59375	0.0625	1.59375	0.0625	1.59375	0.125
2017-12-12	12:00:00	1.96875	26.1875	1.96875	0.125	1.96875	0	1.96875	0	1.96875	0.625
2017-12-12	12:30:00	0.5625	0.375	0.5625	0	0.5625	0	0.5625	0.75	0.5625	0
2017-12-12	13:00:00	0.28125	0.4375	0.28125	0	0.28125	0.1875	0.28125	0	0.28125	0.6875
2017-12-12	13:30:00	0.3125	5.875	0.3125	0	0.3125	0.1875	0.3125	0.25	0.3125	2.75
2017-12-12	14:00:00	0	0.5	0	3.1875	0	0	0	0	0	4.25
2017-12-12	14:30:00	0.40625	1.8125	0.40625	0.1875	0.40625	0	0.40625	0	0.40625	0.75
2017-12-12	15:00:00	0.78125	2.8125	0.78125	0.125	0.78125	0	0.78125	0	0.78125	0
2017-12-12	15:30:00	10.875	2.1875	10.875	2.5625	10.875	0	10.875	12.5	10.875	2.75
2017-12-12	16:00:00	2.25	0.875	2.25	7	2.25	0.9375	2.25	1.875	2.25	0.5625
2017-12-12	16:30:00	2.03125	0	2.03125	0.125	2.03125	0.4375	2.03125	0.5	2.03125	1.0625
2017-12-12	17:00:00	5.09375	0	5.09375	0.4375	5.09375	1.125	5.09375	0	5.09375	4
2017-12-12	17:30:00	15.625	1.125	15.625	1.375	15.625	3	15.625	0	15.625	5.9375
2017-12-12	18:00:00	4.03125	1.75	4.03125	8.8125	4.03125	0.125	4.03125	0.3125	4.03125	0.6875
2017-12-12	18:30:00	1.53125	0.375	1.53125	0.8125	1.53125	3.4375	1.53125	0.9375	1.53125	1.9375
2017-12-12	19:00:00	1.78125	1.6875	1.78125	1.3125	1.78125	0.9375	1.78125	0.0625	1.78125	0.9375
2017-12-12	19:30:00	44.4688	3.1875	44.4688	0	44.4688	2.1875	44.4688	2.1875	44.4688	40.25
2017-12-12	20:00:00	2.8125	0.9375	2.8125	1.125	2.8125	3.0625	2.8125	6.375	2.8125	2.25
2017-12-12	20:30:00	2.71875	0.625	2.71875	2.375	2.71875	2.5	2.71875	2.0625	2.71875	0.5
2017-12-12	21:00:00	3	6	3	5	3	3.875	3	6.8125	3	11.375
2017-12-12	21:30:00	11.9688	8.125	11.9688	0.5	11.9688	2.5625	11.9688	8.0625	11.9688	12.25
2017-12-12	22:00:00	22.5312	11.8125	22.5312	10.25	22.5312	1.125	22.5312	13.75	22.5312	30
2017-12-12	22:30:00	24.25	14.625	24.25	8.0625	24.25	3.9375	24.25	17.75	24.25	21.6875
2017-12-12	23:00:00	21.125	13.875	21.125	1.8125	21.125	5.375	21.125	14	21.125	15.75
2017-12-12	23:30:00	21.9375	21.25	21.9375	16.625	21.9375	11.375	21.9375	11.125	21.9375	36.125
2017-12-13	00:00:00	17.3438	22.1875	17.3438	15.1875	17.3438	11.8125	17.3438	2.875	17.3438	22.625
2017-12-13	00:30:00	14.4375	14.9375	14.4375	23.3125	14.4375	11.6875	14.4375	9.625	14.4375	14.75
2017-12-13	01:00:00	8.3125	10.375	8.3125	19.4375	8.3125	14.25	8.3125	12.0625	8.3125	23.125
2017-12-13	01:30:00	13.4375	15.3125	13.4375	22.6875	13.4375	22.6875	13.4375	12.375	13.4375	21.75
2017-12-13	02:00:00	13.9062	9	13.9062	13.375	13.9062	6.8125	13.9062	13.375	13.9062	12.5
2017-12-13	02:30:00	11.125	1.8125	11.125	13.625	11.125	8.25	11.125	4.9375	11.125	16.25
2017-12-13	03:00:00	9.65625	9.75	9.65625	18.9375	9.65625	8.875	9.65625	11.125	9.65625	11.8125
2017-12-13	03:30:00	10.0312	7.5	10.0312	14.125	10.0312	5.25	10.0312	9.3125	10.0312	34.3125
2017-12-13	04:00:00	11.0625	11.875	11.0625	10.9375	11.0625	10.25	11.0625	18.3125	11.0625	23.3125
2017-12-13	04:30:00	13.7188	8.8125	13.7188	11.9375	13.7188	10.9375	13.7188	12.375	13.7188	44.125
2017-12-13	05:00:00	17.4375	1.6875	17.4375	8.25	17.4375	9.5	17.4375	33.75	17.4375	45.5
2017-12-13	05:30:00	26.5	6.5	26.5	8.5	26.5	6.5	26.5	29.4375	26.5	54.8125
2017-12-13	06:00:00	38.2812	3.5	38.2812	8.5625	38.2812	14.4375	38.2812	24.6875	38.2812	47.6875
2017-12-13	06:30:00	40.2812	18.125	40.2812	15.8125	40.2812	13.1875	40.2812	28.875	40.2812	52.1875
2017-12-13	07:00:00	33.5625	35	33.5625	6.25	33.5625	15.4375	33.5625	28.25	33.5625	50.8125
2017-12-13	07:30:00	47.2812	35.5625	47.2812	21.1875	47.2812	10.9375	47.2812	35.5	47.2812	42.9375
2017-12-13	08:00:00	46.8438	36	46.8438	29.1875	46.8438	18.4375	46.8438	40.375	46.8438	52.6875
2017-12-13	08:30:00	40.75	35.5625	40.75	33.3125	40.75	17.9375	40.75	27.5	40.75	33.125
2017-12-13	09:00:00	44.375	46.625	44.375	27.125	44.375	18.5	44.375	21.4375	44.375	25.25
2017-12-13	09:30:00	45.9062	37.75	45.9062	33.75	45.9062	31.875	45.9062	14.6875	45.9062	13.3125
2017-12-13	10:00:00	42.4062	36.375	42.4062	35.5625	42.4062	35.3125	42.4062	10.75	42.4062	7.6875
2017-12-13	10:30:00	25.5312	41	25.5312	50.375	25.5312	34.875	25.5312	2.625	25.5312	5.8125
2017-12-13	11:00:00	4.78125	41.5	4.78125	39.1875	4.78125	27	4.78125	2.1875	4.78125	4.1875
2017-12-13	11:30:00	2	33.375	2	41.8125	2	38.6875	2	0.0625	2	0.1875
2017-12-13	12:00:00	1.34375	18.0625	1.34375	43.9375	1.34375	33.3125	1.34375	0.3125	1.34375	0.3125
2017-12-13	12:30:00	0.25	13	0.25	42.375	0.25	32.75	0.25	0	0.25	1.0625
2017-12-13	13:00:00	0.46875	3.875	0.46875	38.3125	0.46875	31.3125	0.46875	0	0.46875	0.4375
2017-12-13	13:30:00	2.03125	0.5625	2.03125	28.25	2.03125	23.125	2.03125	0	2.03125	1.4375
2017-12-13	14:00:00	0.5	0.5	0.5	8.5625	0.5	6.25	0.5	0	0.5	0.0625
2017-12-13	14:30:00	2.21875	6.9375	2.21875	19.875	2.21875	8.1875	2.21875	0.5625	2.21875	1.625
2017-12-13	15:00:00	0.03125	0.0625	0.03125	1.8125	0.03125	1.1875	0.03125	0.75	0.03125	0.75
2017-12-13	15:30:00	1.875	0.1875	1.875	0.75	1.875	0	1.875	0.0625	1.875	1.4375
2017-12-13	16:00:00	0.75	0.1875	0.75	0	0.75	0	0.75	4.375	0.75	0.125
2017-12-13	16:30:00	0.3125	0.25	0.3125	0	0.3125	0	0.3125	0	0.3125	0.5625
2017-12-13	17:00:00	0.5625	1.0625	0.5625	1.0625	0.5625	0	0.5625	0.3125	0.5625	0.625
2017-12-13	17:30:00	1.125	1.5625	1.125	0.1875	1.125	0	1.125	0.3125	1.125	2.3125
2017-12-13	18:00:00	0.03125	0.1875	0.03125	0	0.03125	0	0.03125	0.0625	0.03125	6.9375
2017-12-13	18:30:00	0.3125	0.125	0.3125	0	0.3125	0	0.3125	1.9375	0.3125	8.25
2017-12-13	19:00:00	2.75	1.375	2.75	0.1875	2.75	0	2.75	6.8125	2.75	10.8125
2017-12-13	19:30:00	2.46875	0.0625	2.46875	0	2.46875	0	2.46875	3.875	2.46875	16.0625
2017-12-13	20:00:00	3.25	0.5625	3.25	0.1875	3.25	0	3.25	6.3125	3.25	15
2017-12-13	20:30:00	13.4375	0	13.4375	0	13.4375	0.1875	13.4375	4.8125	13.4375	13.875
2017-12-13	21:00:00	11.8438	1.1875	11.8438	0.75	11.8438	0	11.8438	8.5	11.8438	18
2017-12-13	21:30:00	16.9688	2.4375	16.9688	0	16.9688	0.4375	16.9688	8.1875	16.9688	19.125
2017-12-13	22:00:00	15.25	1.0625	15.25	0.125	15.25	0	15.25	3.0625	15.25	10.0625
2017-12-13	22:30:00	14.3438	7.375	14.3438	1	14.3438	1	14.3438	5.75	14.3438	9.4375
2017-12-13	23:00:00	13.8438	8.8125	13.8438	6.8125	13.8438	1.125	13.8438	4.1875	13.8438	8.25
2017-12-13	23:30:00	13.9688	11.6875	13.9688	8.6875	13.9688	7.5625	13.9688	8.125	13.9688	15.6875
2017-12-14	00:00:00	11.625	10.6875	11.625	13.25	11.625	3.6875	11.625	9.75	11.625	23.5625
2017-12-14	00:30:00	7.15625	9.875	7.15625	15.9375	7.15625	6.4375	7.15625	9.0625	7.15625	9
2017-12-14	01:00:00	11.5938	7.6875	11.5938	12.8125	11.5938	8.8125	11.5938	7.375	11.5938	11.3125
2017-12-14	01:30:00	13.7812	10.4375	13.7812	15.75	13.7812	11.0625	13.7812	14.125	13.7812	21.875
2017-12-14	02:00:00	15.0312	5.9375	15.0312	12	15.0312	7.4375	15.0312	3.75	15.0312	18.5
2017-12-14	02:30:00	7.28125	4.9375	7.28125	4.75	7.28125	6.5625	7.28125	9.4375	7.28125	30.3125
2017-12-14	03:00:00	15.75	3.375	15.75	16.875	15.75	4.9375	15.75	3.5	15.75	27.625
2017-12-14	03:30:00	14.125	0	14.125	9.8125	14.125	12.0625	14.125	21	14.125	31.375
2017-12-14	04:00:00	14.5625	13	14.5625	6.375	14.5625	7	14.5625	13.1875	14.5625	36.4375
2017-12-14	04:30:00	21.375	3.9375	21.375	13.3125	21.375	3.875	21.375	25.8125	21.375	43.4375
2017-12-14	05:00:00	32.5312	14.0625	32.5312	3.3125	32.5312	11.9375	32.5312	20.625	32.5312	42.875
2017-12-14	05:30:00	38.3438	6.6875	38.3438	8.8125	38.3438	4.6875	38.3438	30.375	38.3438	48.6875
2017-12-14	06:00:00	37.2188	17.5	37.2188	16	37.2188	13.3125	37.2188	37.25	37.2188	42.6875
2017-12-14	06:30:00	41.5938	19.1875	41.5938	13.0625	41.5938	20	41.5938	37.3125	41.5938	50.4375
2017-12-14	07:00:00	42.125	23.875	42.125	22.625	42.125	10.375	42.125	38.625	42.125	48.75
2017-12-14	07:30:00	49.5	41.3125	49.5	14.3125	49.5	11.1875	49.5	33.6875	49.5	47.3125
2017-12-14	08:00:00	44.9688	31.8125	44.9688	20.625	44.9688	18.3125	44.9688	37.4375	44.9688	48.75
2017-12-14	08:30:00	48.5	35.0625	48.5	25.875	48.5	17.125	48.5	31.5	48.5	44.3125
2017-12-14	09:00:00	45.9688	29.875	45.9688	30.5	45.9688	18.8125	45.9688	25	45.9688	23.1875
2017-12-14	09:30:00	44.5938	40.75	44.5938	29.6875	44.5938	25.875	44.5938	17.9375	44.5938	8
2017-12-14	10:00:00	45.7812	34	45.7812	40.5625	45.7812	25.6875	45.7812	8.5	45.7812	7.9375
2017-12-14	10:30:00	22.6875	40.75	22.6875	37.75	22.6875	36.125	22.6875	5.625	22.6875	5.0625
2017-12-14	11:00:00	10.5	43.5	10.5	41.5	10.5	33.4375	10.5	1.125	10.5	1.875
2017-12-14	11:30:00	4.375	49.6875	4.375	51.0625	4.375	36.625	4.375	1.375	4.375	1.8125
2017-12-14	12:00:00	2.6875	47.1875	2.6875	44	2.6875	34.75	2.6875	0	2.6875	0.0625
2017-12-14	12:30:00	0.125	25.5	0.125	47	0.125	34.9375	0.125	0.125	0.125	0
2017-12-14	13:00:00	1.6875	9.625	1.6875	45.1875	1.6875	30.0625	1.6875	0	1.6875	0.3125
2017-12-14	13:30:00	0.1875	3.0625	0.1875	42	0.1875	30.3125	0.1875	0	0.1875	0
2017-12-14	14:00:00	0.5625	0.1875	0.5625	30.0625	0.5625	27.375	0.5625	0	0.5625	0.0625
2017-12-14	14:30:00	1	5.25	1	31.4375	1	25.5	1	0.5	1	2.75
2017-12-14	15:00:00	0.09375	0	0.09375	14.875	0.09375	8.5625	0.09375	1.9375	0.09375	0.25
2017-12-14	15:30:00	2.21875	0	2.21875	3.3125	2.21875	0.6875	2.21875	0	2.21875	1.8125
2017-12-14	16:00:00	0.9375	0	0.9375	0.5625	0.9375	0.3125	0.9375	0	0.9375	0.5
2017-12-14	16:30:00	0.5625	0	0.5625	0.375	0.5625	0.9375	0.5625	0.6875	0.5625	1.5
2017-12-14	17:00:00	0.65625	0	0.65625	0.6875	0.65625	0	0.65625	0.125	0.65625	1
2017-12-14	17:30:00	1.25	0	1.25	0.25	1.25	0	1.25	0	1.25	3.0625
2017-12-14	18:00:00	0.34375	1.0625	0.34375	0.6875	0.34375	0	0.34375	0	0.34375	5.6875
2017-12-14	18:30:00	1.8125	0.8125	1.8125	0.5	1.8125	0	1.8125	2.9375	1.8125	15.8125
2017-12-14	19:00:00	1.875	0.0625	1.875	0	1.875	0.0625	1.875	1.8125	1.875	11.1875
2017-12-14	19:30:00	5.625	0.0625	5.625	0.25	5.625	0	5.625	6.375	5.625	9.25
2017-12-14	20:00:00	4.375	0.375	4.375	0.0625	4.375	0	4.375	8.1875	4.375	15.75
2017-12-14	20:30:00	8.5	1.6875	8.5	2.5625	8.5	0	8.5	7.0625	8.5	17.375
2017-12-14	21:00:00	14.0938	0.4375	14.0938	0.8125	14.0938	0	14.0938	3.375	14.0938	9.5
2017-12-14	21:30:00	6.15625	1.125	6.15625	0	6.15625	0.375	6.15625	10.625	6.15625	5.4375
2017-12-14	22:00:00	13.0938	3.1875	13.0938	3.625	13.0938	3.3125	13.0938	14.25	13.0938	10.5
2017-12-14	22:30:00	11.4688	7.3125	11.4688	0.5	11.4688	1.3125	11.4688	3.9375	11.4688	9.1875
2017-12-14	23:00:00	5.6875	1.4375	5.6875	1.6875	5.6875	0.5	5.6875	4.625	5.6875	25.1875
2017-12-14	23:30:00	8.5625	6.1875	8.5625	1.5	8.5625	0.25	8.5625	7.3125	8.5625	18.1875
2017-12-15	00:00:00	9.1875	11.6875	9.1875	12.0625	9.1875	4.3125	9.1875	10.375	9.1875	11.875
2017-12-15	00:30:00	11.3125	14.25	11.3125	7.25	11.3125	3.625	11.3125	5.6875	11.3125	6.9375
2017-12-15	01:00:00	6.96875	11.6875	6.96875	14.25	6.96875	5.75	6.96875	4	6.96875	14.25
2017-12-15	01:30:00	15.9688	9.1875	15.9688	9.5625	15.9688	4.0625	15.9688	4.3125	15.9688	21.9375
2017-12-15	02:00:00	9.78125	3.125	9.78125	10.25	9.78125	5.875	9.78125	11.1875	9.78125	23.375
2017-12-15	02:30:00	8.8125	1.8125	8.8125	6.5	8.8125	2.0625	8.8125	8	8.8125	15.5
2017-12-15	03:00:00	14.4375	8.25	14.4375	9.3125	14.4375	3.9375	14.4375	8.625	14.4375	30.25
2017-12-15	03:30:00	15.5	0.125	15.5	12.75	15.5	7.625	15.5	15.1875	15.5	32.375
2017-12-15	04:00:00	24.9688	8.5625	24.9688	7.4375	24.9688	3.375	24.9688	13.875	24.9688	38.625
2017-12-15	04:30:00	20.8438	9.875	20.8438	9.875	20.8438	3.625	20.8438	26.125	20.8438	41.625
2017-12-15	05:00:00	29.4062	10.625	29.4062	6.75	29.4062	11.75	29.4062	27	29.4062	47.5
2017-12-15	05:30:00	31.8125	6.25	31.8125	9.75	31.8125	6.25	31.8125	26.5625	31.8125	45.0625
2017-12-15	06:00:00	34.7812	21.3125	34.7812	13.3125	34.7812	6.4375	34.7812	26.75	34.7812	46.6875
2017-12-15	06:30:00	39.7812	19.75	39.7812	11.0625	39.7812	9.9375	39.7812	40.75	39.7812	53.75
2017-12-15	07:00:00	34.3125	17.375	34.3125	12.375	34.3125	8.1875	34.3125	29.375	34.3125	53.5625
2017-12-15	07:30:00	40.8438	20.875	40.8438	16.4375	40.8438	8.4375	40.8438	28.75	40.8438	54.4375
2017-12-15	08:00:00	42.625	27.625	42.625	15.0625	42.625	13.25	42.625	37.25	42.625	47.1875
2017-12-15	08:30:00	43.8125	31.5625	43.8125	27.25	43.8125	19.6875	43.8125	19.375	43.8125	24
2017-12-15	09:00:00	41.9062	28.8125	41.9062	23.1875	41.9062	14.9375	41.9062	20.1875	41.9062	17.75
2017-12-15	09:30:00	33.9375	40.75	33.9375	34.625	33.9375	15.25	33.9375	10.875	33.9375	7.1875
2017-12-15	10:00:00	26.0938	36	26.0938	30.6875	26.0938	19.375	26.0938	3.1875	26.0938	5.25
2017-12-15	10:30:00	14.8125	43.4375	14.8125	29	14.8125	27.4375	14.8125	2.75	14.8125	2.875
2017-12-15	11:00:00	7.125	45.6875	7.125	36.0625	7.125	27.25	7.125	1.4375	7.125	2
2017-12-15	11:30:00	4.53125	43.3125	4.53125	42.6875	4.53125	29.375	4.53125	1	4.53125	0.5
2017-12-15	12:00:00	3.3125	35.9375	3.3125	41.4375	3.3125	41.75	3.3125	0.1875	3.3125	0.5
2017-12-15	12:30:00	0.65625	25.1875	0.65625	46.125	0.65625	39.4375	0.65625	0.1875	0.65625	1.1875
2017-12-15	13:00:00	0.28125	13.75	0.28125	42.5	0.28125	36.3125	0.28125	0.0625	0.28125	1
2017-12-15	13:30:00	0.90625	3	0.90625	33.75	0.90625	35.4375	0.90625	0	0.90625	0.125
2017-12-15	14:00:00	0.28125	0.1875	0.28125	29.1875	0.28125	34.1875	0.28125	0.375	0.28125	2.6875
2017-12-15	14:30:00	3.5	13.625	3.5	38.6875	3.5	37.9375	3.5	0.6875	3.5	0.125
2017-12-15	15:00:00	1.3125	1.125	1.3125	17.5625	1.3125	24.1875	1.3125	3.0625	1.3125	0.625
2017-12-15	15:30:00	0.53125	0	0.53125	9.625	0.53125	13.6875	0.53125	0.0625	0.53125	0
2017-12-15	16:00:00	0.90625	0	0.90625	6.0625	0.90625	3.9375	0.90625	0	0.90625	1.5625
2017-12-15	16:30:00	1.9375	0	1.9375	3.75	1.9375	2.875	1.9375	1.5	1.9375	0
2017-12-15	17:00:00	1.65625	1	1.65625	1.125	1.65625	3.0625	1.65625	0	1.65625	1
2017-12-15	17:30:00	0.78125	2.0625	0.78125	1.25	0.78125	1.5625	0.78125	0.1875	0.78125	2
2017-12-15	18:00:00	0.75	0.0625	0.75	3	0.75	1.5	0.75	0.0625	0.75	8.6875
2017-12-15	18:30:00	0.6875	0.0625	0.6875	0.4375	0.6875	2.9375	0.6875	0	0.6875	14.1875
2017-12-15	19:00:00	4.53125	0.25	4.53125	2.5	4.53125	1.125	4.53125	9.125	4.53125	7.6875
2017-12-15	19:30:00	5.65625	1.9375	5.65625	2.125	5.65625	0.5	5.65625	1.9375	5.65625	14.9375
2017-12-15	20:00:00	9.28125	0	9.28125	2.5	9.28125	2	9.28125	6.875	9.28125	17.4375
2017-12-15	20:30:00	8	1.75	8	0.125	8	2.4375	8	10.125	8	10.75
2017-12-15	21:00:00	7.90625	0.4375	7.90625	0.9375	7.90625	0.25	7.90625	2.5	7.90625	10.9375
2017-12-15	21:30:00	10.5938	0.9375	10.5938	0.875	10.5938	2	10.5938	7.625	10.5938	6.6875
2017-12-15	22:00:00	11.9375	1.125	11.9375	0	11.9375	0.1875	11.9375	6.75	11.9375	2.5
2017-12-15	22:30:00	7.78125	7.8125	7.78125	0.125	7.78125	2.4375	7.78125	5.9375	7.78125	6
2017-12-15	23:00:00	7.5625	4.4375	7.5625	1.0625	7.5625	0	7.5625	7.5625	7.5625	13.375
2017-12-15	23:30:00	9.9375	0.3125	9.9375	11.0625	9.9375	1.4375	9.9375	4.1875	9.9375	18.4375
2017-12-16	00:00:00	4.5	8.375	4.5	3.0625	4.5	4.6875	4.5	7.5625	4.5	6.375
2017-12-16	00:30:00	5.5625	6.6875	5.5625	4	5.5625	3.25	5.5625	3.875	5.5625	12.5
2017-12-16	01:00:00	15.25	1.75	15.25	11.1875	15.25	2	15.25	15.875	15.25	12.5
2017-12-16	01:30:00	16.0938	7.0625	16.0938	7.1875	16.0938	6.4375	16.0938	8.375	16.0938	19.0625
2017-12-16	02:00:00	11.3438	1.625	11.3438	11.4375	11.3438	5.1875	11.3438	9.5	11.3438	25.375
2017-12-16	02:30:00	10.1875	8.875	10.1875	5.0625	10.1875	2.875	10.1875	8	10.1875	23.5
2017-12-16	03:00:00	15.3438	7.375	15.3438	12.125	15.3438	1.75	15.3438	15.3125	15.3438	22.5625
2017-12-16	03:30:00	11.9062	9.625	11.9062	8.875	11.9062	6.9375	11.9062	12.8125	11.9062	40.625
2017-12-16	04:00:00	17.2812	2.125	17.2812	5.0625	17.2812	1.625	17.2812	14.5	17.2812	32.3125
2017-12-16	04:30:00	25	4.25	25	6.6875	25	6.0625	25	21.3125	25	39.25
2017-12-16	05:00:00	29.375	9	29.375	10.9375	29.375	5.6875	29.375	25.3125	29.375	43.8125
2017-12-16	05:30:00	25.7188	9.0625	25.7188	16.125	25.7188	4.625	25.7188	21.5	25.7188	43.3125
2017-12-16	06:00:00	29.7812	13.5	29.7812	12	29.7812	4.25	29.7812	21.125	29.7812	50.875
2017-12-16	06:30:00	33.5312	5	33.5312	9.0625	33.5312	4.4375	33.5312	32.4375	33.5312	39.5
2017-12-16	07:00:00	33.1562	23	33.1562	7.375	33.1562	11.5	33.1562	23.4375	33.1562	41.4375
2017-12-16	07:30:00	45.25	19.0625	45.25	19.6875	45.25	6.5625	45.25	27	45.25	36.5625
2017-12-16	08:00:00	33.1875	22.9375	33.1875	6.5625	33.1875	8.5	33.1875	28.375	33.1875	25.875
2017-12-16	08:30:00	32.4375	25.5	32.4375	18.4375	32.4375	12.5	32.4375	22.125	32.4375	14.4375
2017-12-16	09:00:00	27.125	35.5625	27.125	24.6875	27.125	8.1875	27.125	12.125	27.125	10.625
2017-12-16	09:30:00	20.6875	37.5625	20.6875	21.9375	20.6875	23.5625	20.6875	12.125	20.6875	7.5
2017-12-16	10:00:00	11.5312	38.9375	11.5312	28.6875	11.5312	16.125	11.5312	5.875	11.5312	4.125
2017-12-16	10:30:00	9.21875	39.9375	9.21875	30	9.21875	21	9.21875	5.625	9.21875	1.5625
2017-12-16	11:00:00	6.5625	33.5625	6.5625	34.75	6.5625	29.9375	6.5625	3.0625	6.5625	1.5
2017-12-16	11:30:00	3.1875	35	3.1875	36.0625	3.1875	31.125	3.1875	2.125	3.1875	1.1875
2017-12-16	12:00:00	0.15625	28.3125	0.15625	32.5	0.15625	43.5625	0.15625	2.75	0.15625	2
2017-12-16	12:30:00	2.84375	20	2.84375	31.5	2.84375	37.8125	2.84375	0.3125	2.84375	0.625
2017-12-16	13:00:00	0.84375	14.1875	0.84375	32.75	0.84375	43.125	0.84375	1.4375	0.84375	1.3125
2017-12-16	13:30:00	0.84375	9.5	0.84375	29.25	0.84375	38.0625	0.84375	0.75	0.84375	0.3125
2017-12-16	14:00:00	1	3.125	1	23.125	1	36.4375	1	1.0625	1	1.375
2017-12-16	14:30:00	2.6875	22.25	2.6875	37.75	2.6875	40.1875	2.6875	5.75	2.6875	2.0625
2017-12-16	15:00:00	1.1875	4.5	1.1875	20.625	1.1875	28.875	1.1875	0.75	1.1875	1.4375
2017-12-16	15:30:00	0.625	2.9375	0.625	12.5	0.625	11.8125	0.625	0.6875	0.625	0
2017-12-16	16:00:00	1.6875	0	1.6875	3.875	1.6875	6.125	1.6875	2.0625	1.6875	1.6875
2017-12-16	16:30:00	0.875	2.5	0.875	4.5	0.875	4.3125	0.875	2.3125	0.875	2.875
2017-12-16	17:00:00	0.125	0.375	0.125	3.8125	0.125	4.0625	0.125	0.0625	0.125	0.75
2017-12-16	17:30:00	1.875	3.0625	1.875	2.1875	1.875	3.625	1.875	0.5	1.875	12.3125
2017-12-16	18:00:00	2.8125	1.375	2.8125	3	2.8125	1.875	2.8125	0.4375	2.8125	8.4375
2017-12-16	18:30:00	2.8125	2.375	2.8125	5	2.8125	1.375	2.8125	6.4375	2.8125	15.5625
2017-12-16	19:00:00	1.9375	1.125	1.9375	0.5	1.9375	2.875	1.9375	6.8125	1.9375	12.3125
2017-12-16	19:30:00	5.59375	0.9375	5.59375	1.3125	5.59375	3.6875	5.59375	8.375	5.59375	12.625
2017-12-16	20:00:00	9.1875	0.125	9.1875	2.75	9.1875	0.5	9.1875	5.375	9.1875	5.875
2017-12-16	20:30:00	9.75	0.0625	9.75	1.6875	9.75	1.125	9.75	6.5	9.75	12.8125
2017-12-16	21:00:00	11.5312	0.0625	11.5312	0.875	11.5312	0.5625	11.5312	8.375	11.5312	7.125
2017-12-16	21:30:00	5.65625	1.375	5.65625	0.8125	5.65625	0	5.65625	4.4375	5.65625	9.0625
2017-12-16	22:00:00	6.34375	3.25	6.34375	2.75	6.34375	0	6.34375	4.125	6.34375	7.125
2017-12-16	22:30:00	6.28125	5.1875	6.28125	0.0625	6.28125	0	6.28125	10	6.28125	13.9375
2017-12-16	23:00:00	6.75	2.0625	6.75	4.9375	6.75	0.375	6.75	8.9375	6.75	7.9375
2017-12-16	23:30:00	5.71875	1.75	5.71875	8.5	5.71875	0.5	5.71875	3.5625	5.71875	16.4375
2017-12-17	00:00:00	10.1562	1.375	10.1562	3.1875	10.1562	0.1875	10.1562	7.75	10.1562	21.625
2017-12-17	00:30:00	10.8125	10.125	10.8125	7.0625	10.8125	3.25	10.8125	3.5625	10.8125	15
2017-12-17	01:00:00	11.7812	2.8125	11.7812	6.4375	11.7812	6.4375	11.7812	8.6875	11.7812	14.1875
2017-12-17	01:30:00	11.9062	1	11.9062	11.1875	11.9062	2.125	11.9062	11.0625	11.9062	22.3125
2017-12-17	02:00:00	7.15625	12.75	7.15625	4	7.15625	3.9375	7.15625	15	7.15625	18.125
2017-12-17	02:30:00	9.53125	2.75	9.53125	8.375	9.53125	3.8125	9.53125	3.9375	9.53125	24.6875
2017-12-17	03:00:00	12.4062	6.75	12.4062	10.625	12.4062	5.125	12.4062	14.8125	12.4062	32.3125
2017-12-17	03:30:00	15.75	2.75	15.75	9.3125	15.75	4.3125	15.75	14.5625	15.75	28.125
2017-12-17	04:00:00	17.6875	5.375	17.6875	5.6875	17.6875	6.8125	17.6875	21	17.6875	33.25
2017-12-17	04:30:00	20.75	8	20.75	13.625	20.75	7.3125	20.75	17.625	20.75	32.5625
2017-12-17	05:00:00	22.5938	8.25	22.5938	5.9375	22.5938	9.125	22.5938	20.9375	22.5938	43.375
2017-12-17	05:30:00	26.3125	4.8125	26.3125	7.0625	26.3125	3.25	26.3125	23.3125	26.3125	37.8125
2017-12-17	06:00:00	30.9375	18.8125	30.9375	7.3125	30.9375	5.625	30.9375	23.75	30.9375	35.0625
2017-12-17	06:30:00	24.125	3.375	24.125	10.75	24.125	6.3125	24.125	25.3125	24.125	37.875
2017-12-17	07:00:00	27.5312	13.5625	27.5312	16.9375	27.5312	2.5	27.5312	22.6875	27.5312	26.9375
2017-12-17	07:30:00	28	22.25	28	15.6875	28	11.8125	28	26.8125	28	20.1875
2017-12-17	08:00:00	28.375	20.5625	28.375	13.8125	28.375	15.6875	28.375	25.75	28.375	11.9375
2017-12-17	08:30:00	20.6562	30.75	20.6562	14.125	20.6562	11.4375	20.6562	18.6875	20.6562	11.875
2017-12-17	09:00:00	20.1562	27.625	20.1562	23.25	20.1562	15.125	20.1562	16.375	20.1562	7.4375
2017-12-17	09:30:00	12.2812	32.25	12.2812	18.375	12.2812	24.875	12.2812	9.25	12.2812	7
2017-12-17	10:00:00	10.125	37.3125	10.125	26.75	10.125	24.9375	10.125	2.875	10.125	3.25
2017-12-17	10:30:00	6.0625	32.625	6.0625	28.375	6.0625	33.25	6.0625	3.1875	6.0625	2.8125
2017-12-17	11:00:00	3	32.75	3	29.875	3	36.4375	3	5.0625	3	2.625
2017-12-17	11:30:00	3.875	27.0625	3.875	31.5625	3.875	35.1875	3.875	4.1875	3.875	1.4375
2017-12-17	12:00:00	2.40625	27	2.40625	34.1875	2.40625	34.875	2.40625	0.0625	2.40625	2.375
2017-12-17	12:30:00	2.09375	16.375	2.09375	34.625	2.09375	38.8125	2.09375	0.9375	2.09375	2.3125
2017-12-17	13:00:00	1.90625	13.125	1.90625	25.5625	1.90625	34.25	1.90625	3.75	1.90625	4.3125
2017-12-17	13:30:00	3.25	8.5	3.25	25.4375	3.25	31.375	3.25	0.6875	3.25	0
2017-12-17	14:00:00	1.71875	6.5625	1.71875	22.1875	1.71875	27.0625	1.71875	0.1875	1.71875	1.125
2017-12-17	14:30:00	5.84375	20.375	5.84375	35.5	5.84375	34.4375	5.84375	1.375	5.84375	5.125
2017-12-17	15:00:00	4.71875	7.375	4.71875	17.6875	4.71875	24.9375	4.71875	1.75	4.71875	1.875
2017-12-17	15:30:00	2.6875	1.125	2.6875	12.3125	2.6875	12.4375	2.6875	0	2.6875	0.25
2017-12-17	16:00:00	1.6875	1.1875	1.6875	9.375	1.6875	5.8125	1.6875	0.5	1.6875	2.375
2017-12-17	16:30:00	0.84375	2.375	0.84375	3.625	0.84375	1.5	0.84375	0.1875	0.84375	3.625
2017-12-17	17:00:00	2.78125	0.5	2.78125	5.6875	2.78125	5.375	2.78125	4.6875	2.78125	4.125
2017-12-17	17:30:00	1.625	1.9375	1.625	5	1.625	2.5	1.625	3.4375	1.625	8
2017-12-17	18:00:00	4.59375	0	4.59375	2.375	4.59375	6.5625	4.59375	2.4375	4.59375	14.0625
2017-12-17	18:30:00	4	1.375	4	2.625	4	1.1875	4	1.9375	4	11.25
2017-12-17	19:00:00	7.625	0	7.625	6.3125	7.625	2.3125	7.625	13.125	7.625	9.375
2017-12-17	19:30:00	8	2.875	8	3.125	8	1.75	8	8.625	8	14.1875
2017-12-17	20:00:00	6.90625	0.0625	6.90625	0.9375	6.90625	2.1875	6.90625	7	6.90625	8.5
2017-12-17	20:30:00	11.3438	0.5625	11.3438	0.8125	11.3438	0.875	11.3438	3.875	11.3438	13.1875
2017-12-17	21:00:00	10.625	0	10.625	2	10.625	0.5	10.625	12.5625	10.625	17.875
2017-12-17	21:30:00	15.7812	8	15.7812	2.1875	15.7812	0	15.7812	11.75	15.7812	15.125
2017-12-17	22:00:00	6.875	3.5625	6.875	2.875	6.875	0	6.875	6.125	6.875	22.6875
2017-12-17	22:30:00	11.9375	0.3125	11.9375	4.75	11.9375	2.0625	11.9375	17.25	11.9375	12.1875
2017-12-17	23:00:00	12.9375	2.6875	12.9375	5.125	12.9375	3	12.9375	4.5625	12.9375	7.625
2017-12-17	23:30:00	7.59375	5	7.59375	2.5625	7.59375	5.6875	7.59375	3.625	7.59375	14.9375
2017-12-18	00:00:00	7.8125	4.5	7.8125	7.9375	7.8125	1.1875	7.8125	8.875	7.8125	19.5
2017-12-18	00:30:00	9.84375	7.375	9.84375	7.1875	9.84375	3.125	9.84375	7.4375	9.84375	20.4375
2017-12-18	01:00:00	12.3438	0.875	12.3438	6.875	12.3438	5.5625	12.3438	9.3125	12.3438	17.75
2017-12-18	01:30:00	12.6875	6.125	12.6875	4.875	12.6875	5.125	12.6875	15.6875	12.6875	29.1875
2017-12-18	02:00:00	9.34375	1.6875	9.34375	8.9375	9.34375	5	9.34375	5.4375	9.34375	24.75
2017-12-18	02:30:00	12.8125	6	12.8125	5.5625	12.8125	1.4375	12.8125	13.1875	12.8125	20.4375
2017-12-18	03:00:00	13.4062	15.5625	13.4062	8.125	13.4062	0.25	13.4062	11.5	13.4062	29.0625
2017-12-18	03:30:00	15.375	4.375	15.375	3.8125	15.375	5.5	15.375	20.0625	15.375	39.9375
2017-12-18	04:00:00	23.4688	4.4375	23.4688	15.125	23.4688	7.6875	23.4688	15.4375	23.4688	35.0625
2017-12-18	04:30:00	21.9688	6.1875	21.9688	12.1875	21.9688	7.875	21.9688	18.875	21.9688	35.4375
2017-12-18	05:00:00	27.5938	5.125	27.5938	9	27.5938	4.5625	27.5938	20.25	27.5938	37.125
2017-12-18	05:30:00	34.6562	11	34.6562	5.4375	34.6562	4	34.6562	20.125	34.6562	36.5
2017-12-18	06:00:00	27.1562	8.5	27.1562	17.8125	27.1562	7.9375	27.1562	31.25	27.1562	34.3125
2017-12-18	06:30:00	28.4375	23.3125	28.4375	10.5	28.4375	13.625	28.4375	23.375	28.4375	39.3125
2017-12-18	07:00:00	30.1562	14.125	30.1562	15.0625	30.1562	9.375	30.1562	19.375	30.1562	31.625
2017-12-18	07:30:00	27.4375	25.3125	27.4375	10.5625	27.4375	11.0625	27.4375	18.9375	27.4375	19.125
2017-12-18	08:00:00	21.7812	22.6875	21.7812	19.9375	21.7812	6.625	21.7812	18.6875	21.7812	15.75
2017-12-18	08:30:00	18.3438	26.4375	18.3438	16.0625	18.3438	24.625	18.3438	12.375	18.3438	10.5625
2017-12-18	09:00:00	16.4375	31.75	16.4375	22	16.4375	12.875	16.4375	9.5625	16.4375	3.75
2017-12-18	09:30:00	11.3125	29.0625	11.3125	18.8125	11.3125	16.25	11.3125	3.875	11.3125	2.9375
2017-12-18	10:00:00	7.625	30.5	7.625	28.625	7.625	33.4375	7.625	4.5	7.625	0.625
2017-12-18	10:30:00	9.9375	33.875	9.9375	30	9.9375	30	9.9375	1.0625	9.9375	1.875
2017-12-18	11:00:00	4.75	31.9375	4.75	33.1875	4.75	38.0625	4.75	5.375	4.75	1
2017-12-18	11:30:00	5.15625	30.625	5.15625	30.875	5.15625	35	5.15625	2.25	5.15625	1.125
2017-12-18	12:00:00	3.375	23.0625	3.375	33.4375	3.375	28.375	3.375	5	3.375	0.0625
2017-12-18	12:30:00	5.21875	17.125	5.21875	31.5	5.21875	27.9375	5.21875	3	5.21875	3.8125
2017-12-18	13:00:00	2.09375	11.4375	2.09375	25.375	2.09375	33.375	2.09375	0	2.09375	5
2017-12-18	13:30:00	5.375	6.875	5.375	21.5	5.375	25.1875	5.375	2.9375	5.375	1.25
2017-12-18	14:00:00	4.5625	3.9375	4.5625	19.25	4.5625	16.6875	4.5625	0	4.5625	2.125
2017-12-18	14:30:00	6.0625	19.9375	6.0625	40	6.0625	30.3125	6.0625	4.5625	6.0625	4.375
2017-12-18	15:00:00	3.6875	1.5625	3.6875	15.9375	3.6875	15.5625	3.6875	3.3125	3.6875	3.0625
2017-12-18	15:30:00	4.21875	1.9375	4.21875	10.5625	4.21875	8.625	4.21875	0.75	4.21875	4.0625
2017-12-18	16:00:00	2.71875	0.6875	2.71875	7.5	2.71875	4.1875	2.71875	2.5	2.71875	1.625
2017-12-18	16:30:00	3.84375	1.875	3.84375	6.125	3.84375	0.125	3.84375	1.3125	3.84375	4.625
2017-12-18	17:00:00	3.96875	2.5	3.96875	7.6875	3.96875	2.625	3.96875	2.0625	3.96875	11.5
2017-12-18	17:30:00	7.125	0.5625	7.125	3.625	7.125	1.1875	7.125	1.3125	7.125	7.5625
2017-12-18	18:00:00	7.375	1.5	7.375	4.9375	7.375	0.3125	7.375	11.375	7.375	7.75
2017-12-18	18:30:00	6.625	0.125	6.625	5.125	6.625	0.4375	6.625	6.5625	6.625	7
2017-12-18	19:00:00	10.3125	0	10.3125	1.625	10.3125	0.25	10.3125	11.0625	10.3125	13.125
2017-12-18	19:30:00	5.8125	2.4375	5.8125	1.9375	5.8125	2	5.8125	1.875	5.8125	17.75
2017-12-18	20:00:00	6.53125	1.8125	6.53125	0.8125	6.53125	0.375	6.53125	3.3125	6.53125	19.0625
2017-12-18	20:30:00	9.78125	0.75	9.78125	0	9.78125	0	9.78125	8.5	9.78125	10.9375
2017-12-18	21:00:00	6.0625	2.625	6.0625	0.8125	6.0625	0.375	6.0625	14.5625	6.0625	16.4375
2017-12-18	21:30:00	6.21875	2.125	6.21875	1.1875	6.21875	0	6.21875	4.375	6.21875	18.3125
2017-12-18	22:00:00	12.4688	0.8125	12.4688	3.3125	12.4688	0	12.4688	4.6875	12.4688	12.125
2017-12-18	22:30:00	4.25	0.875	4.25	6.875	4.25	0.1875	4.25	4.25	4.25	11.75
2017-12-18	23:00:00	8.25	3.4375	8.25	4.625	8.25	0.875	8.25	9.9375	8.25	21.1875
2017-12-18	23:30:00	7.6875	1.375	7.6875	0.625	7.6875	2.6875	7.6875	9.625	7.6875	6.125

## Sheet: Psi KD 1
Graphs show behavior in DD
LD: 7-Dec-17 to 12-Dec-17
DD: 13-Dec-17 to 18-Dec-17
TD2/PsiRNAiKK
Date	Time	No Light Pulse	ZT13 Pulse	No Light Pulse	ZT15 Pulse	No Light Pulse	ZT17 Pulse	No Light Pulse	ZT19 Pulse	No Light Pulse	ZT21 Pulse
2017-12-07	00:00:00	53.8438	33.1875	53.8438	52.4375	53.8438	51.9375	53.8438	62.875	53.8438	46.5625
2017-12-07	00:30:00	57.3438	34.9375	57.3438	48.9375	57.3438	51.9375	57.3438	66.6875	57.3438	43.875
2017-12-07	01:00:00	51.8438	24.875	51.8438	46.625	51.8438	50.125	51.8438	58.625	51.8438	45.5625
2017-12-07	01:30:00	47.3125	28.125	47.3125	43	47.3125	44.25	47.3125	60.0625	47.3125	37.375
2017-12-07	02:00:00	37.8125	20.375	37.8125	38.875	37.8125	38.5625	37.8125	57.875	37.8125	36.125
2017-12-07	02:30:00	47.7812	28.875	47.7812	50.8125	47.7812	51.625	47.7812	66.9375	47.7812	33.1875
2017-12-07	03:00:00	39.7188	21.25	39.7188	29.75	39.7188	38.5	39.7188	67	39.7188	29.375
2017-12-07	03:30:00	31.5312	14.0625	31.5312	22.625	31.5312	34.5	31.5312	45.3125	31.5312	25.5
2017-12-07	04:00:00	17.5625	17.0625	17.5625	26.1875	17.5625	31.4375	17.5625	33.875	17.5625	24.375
2017-12-07	04:30:00	25.0938	18.875	25.0938	17.125	25.0938	29.4375	25.0938	32.25	25.0938	19.75
2017-12-07	05:00:00	15.3125	13.3125	15.3125	24.5	15.3125	22.5	15.3125	27.9375	15.3125	23.9375
2017-12-07	05:30:00	26.9688	12.875	26.9688	26.5625	26.9688	24	26.9688	28.0625	26.9688	20.5
2017-12-07	06:00:00	20.9062	12.75	20.9062	27.6875	20.9062	18.5625	20.9062	28.125	20.9062	17.1875
2017-12-07	06:30:00	21.1562	12.625	21.1562	22.25	21.1562	26.75	21.1562	29.8125	21.1562	20.375
2017-12-07	07:00:00	20.1562	9.5	20.1562	22.9375	20.1562	27.5	20.1562	27.4375	20.1562	15.375
2017-12-07	07:30:00	17.9688	20.0625	17.9688	18.75	17.9688	17.3125	17.9688	30.1875	17.9688	25.5
2017-12-07	08:00:00	12.3438	12.5	12.3438	21.4375	12.3438	12.8125	12.3438	29.125	12.3438	19.0625
2017-12-07	08:30:00	21.4688	14.375	21.4688	27.3125	21.4688	21.375	21.4688	21.375	21.4688	26.9375
2017-12-07	09:00:00	19.9375	13.5625	19.9375	27.25	19.9375	19.875	19.9375	19	19.9375	30.3125
2017-12-07	09:30:00	23.5312	13.875	23.5312	14.6875	23.5312	15.75	23.5312	17.0625	23.5312	22.0625
2017-12-07	10:00:00	20.75	9.1875	20.75	19.8125	20.75	8.8125	20.75	20.75	20.75	25.25
2017-12-07	10:30:00	70.4062	84.5625	70.4062	81.5625	70.4062	70.125	70.4062	74.9375	70.4062	78.25
2017-12-07	11:00:00	11.4688	29.75	11.4688	26.8125	11.4688	12.8125	11.4688	18	11.4688	27.8125
2017-12-07	11:30:00	0.96875	8.1875	0.96875	10.5	0.96875	5	0.96875	4.6875	0.96875	5.4375
2017-12-07	12:00:00	0.1875	0.25	0.1875	9.25	0.1875	1.6875	0.1875	4.125	0.1875	0
2017-12-07	12:30:00	0.53125	0.75	0.53125	9.5	0.53125	0.375	0.53125	3.4375	0.53125	0.0625
2017-12-07	13:00:00	1.125	3.5	1.125	2.25	1.125	0.1875	1.125	8.6875	1.125	1.4375
2017-12-07	13:30:00	0.46875	6.375	0.46875	6.4375	0.46875	1.5625	0.46875	4	0.46875	3.5
2017-12-07	14:00:00	2.90625	11.0625	2.90625	4.25	2.90625	2.75	2.90625	7.5625	2.90625	6.625
2017-12-07	14:30:00	0.625	19.9375	0.625	15	0.625	2.875	0.625	7.875	0.625	1.4375
2017-12-07	15:00:00	7.25	2.5625	7.25	26.5	7.25	1.0625	7.25	19.5	7.25	2.125
2017-12-07	15:30:00	6.28125	13.4375	6.28125	11.875	6.28125	2.4375	6.28125	7.5	6.28125	3.5
2017-12-07	16:00:00	9.65625	5.9375	9.65625	11.25	9.65625	5.125	9.65625	6.625	9.65625	0.375
2017-12-07	16:30:00	6.5625	9.9375	6.5625	8.125	6.5625	3.8125	6.5625	14.625	6.5625	4.9375
2017-12-07	17:00:00	13.5312	14.375	13.5312	12.125	13.5312	11.125	13.5312	28.625	13.5312	6.375
2017-12-07	17:30:00	2.71875	11.6875	2.71875	4.4375	2.71875	12.75	2.71875	15.6875	2.71875	13.5625
2017-12-07	18:00:00	11.375	6	11.375	12.4375	11.375	16.875	11.375	6.8125	11.375	25.125
2017-12-07	18:30:00	15.5938	16.5625	15.5938	16.125	15.5938	7.6875	15.5938	26.5625	15.5938	8.125
2017-12-07	19:00:00	13.4062	13.5	13.4062	17	13.4062	4.6875	13.4062	10.625	13.4062	0.4375
2017-12-07	19:30:00	11.1875	5.375	11.1875	23.5	11.1875	5.375	11.1875	11.5	11.1875	8.4375
2017-12-07	20:00:00	8.125	3.125	8.125	11.75	8.125	7.125	8.125	11.625	8.125	23.0625
2017-12-07	20:30:00	5.5	16.75	5.5	22.5	5.5	7.8125	5.5	4.8125	5.5	21.375
2017-12-07	21:00:00	15.375	24.125	15.375	33	15.375	13.8125	15.375	36.125	15.375	20.25
2017-12-07	21:30:00	23	32.25	23	27.9375	23	16.25	23	44.5625	23	36.25
2017-12-07	22:00:00	35.4062	32.5625	35.4062	30.75	35.4062	21.3125	35.4062	40	35.4062	40.8125
2017-12-07	22:30:00	84.9062	68.0625	84.9062	87.0625	84.9062	67.25	84.9062	75.4375	84.9062	85.25
2017-12-07	23:00:00	53.375	51.5	53.375	65.3125	53.375	51.5625	53.375	60.125	53.375	53.5625
2017-12-07	23:30:00	42.25	28.125	42.25	41.375	42.25	38.9375	42.25	42.875	42.25	38.8125
2017-12-08	00:00:00	30.1875	17.1875	30.1875	27.0625	30.1875	26.625	30.1875	40.1875	30.1875	28.3125
2017-12-08	00:30:00	26.1562	14.5625	26.1562	22.375	26.1562	19.875	26.1562	24.375	26.1562	25
2017-12-08	01:00:00	19	13.125	19	12.5	19	19.5	19	21.375	19	17.75
2017-12-08	01:30:00	10.4688	8.125	10.4688	16.6875	10.4688	9.4375	10.4688	18.375	10.4688	15.125
2017-12-08	02:00:00	9.6875	12.375	9.6875	12.625	9.6875	8.0625	9.6875	13.1875	9.6875	8.5625
2017-12-08	02:30:00	13	10.3125	13	20.125	13	10.5	13	14.0625	13	12.375
2017-12-08	03:00:00	17.1562	9.8125	17.1562	15.125	17.1562	21.625	17.1562	14.75	17.1562	14.4375
2017-12-08	03:30:00	11.2188	6	11.2188	14.6875	11.2188	9	11.2188	9.4375	11.2188	7.125
2017-12-08	04:00:00	7.8125	3.375	7.8125	7.1875	7.8125	6.25	7.8125	8.5	7.8125	3.75
2017-12-08	04:30:00	7.03125	6.375	7.03125	13.4375	7.03125	6.5	7.03125	10.1875	7.03125	7.5
2017-12-08	05:00:00	14.5	7.3125	14.5	23.9375	14.5	19.75	14.5	19.3125	14.5	15.5
2017-12-08	05:30:00	27.5625	14.9375	27.5625	21.8125	27.5625	20.9375	27.5625	29.1875	27.5625	12.75
2017-12-08	06:00:00	30.25	11.6875	30.25	29.875	30.25	25.5625	30.25	23.1875	30.25	19.375
2017-12-08	06:30:00	40.375	19.3125	40.375	47.9375	40.375	42	40.375	41.25	40.375	38.3125
2017-12-08	07:00:00	52.0625	33.3125	52.0625	58.25	52.0625	44.25	52.0625	40.0625	52.0625	46.4375
2017-12-08	07:30:00	56.5938	32.9375	56.5938	64.9375	56.5938	53.8125	56.5938	51.25	56.5938	56.125
2017-12-08	08:00:00	81.3125	56.25	81.3125	82.4375	81.3125	73.375	81.3125	67.875	81.3125	65.0625
2017-12-08	08:30:00	87.3125	61.625	87.3125	84	87.3125	65.8125	87.3125	75.875	87.3125	72.125
2017-12-08	09:00:00	93.3438	60.8125	93.3438	83.125	93.3438	70.5625	93.3438	74.5625	93.3438	75.5625
2017-12-08	09:30:00	93.7812	56.8125	93.7812	76.0625	93.7812	74.5	93.7812	79.1875	93.7812	78.625
2017-12-08	10:00:00	90.7188	60.375	90.7188	80.8125	90.7188	70.5	90.7188	80.25	90.7188	71.875
2017-12-08	10:30:00	48.875	50.125	48.875	43.3125	48.875	50.625	48.875	55.5625	48.875	59.6875
2017-12-08	11:00:00	0.5	4.5	0.5	0.875	0.5	0.4375	0.5	4.125	0.5	1
2017-12-08	11:30:00	0.25	1.3125	0.25	1.5	0.25	0.3125	0.25	3.0625	0.25	0.3125
2017-12-08	12:00:00	0	0.8125	0	1.0625	0	4.0625	0	3.9375	0	0.375
2017-12-08	12:30:00	0.34375	0.375	0.34375	0.4375	0.34375	1.9375	0.34375	3.4375	0.34375	0.1875
2017-12-08	13:00:00	0.28125	0	0.28125	0.25	0.28125	1.1875	0.28125	4.375	0.28125	0.4375
2017-12-08	13:30:00	0.375	1.1875	0.375	1	0.375	0.4375	0.375	0.1875	0.375	1.9375
2017-12-08	14:00:00	0.21875	0.3125	0.21875	0.25	0.21875	0.125	0.21875	1.625	0.21875	1.375
2017-12-08	14:30:00	4.6875	6.375	4.6875	1.375	4.6875	3.9375	4.6875	1.0625	4.6875	1.375
2017-12-08	15:00:00	2.46875	1.375	2.46875	0	2.46875	1.625	2.46875	1.375	2.46875	0.6875
2017-12-08	15:30:00	0.09375	5.25	0.09375	0.75	0.09375	0.125	0.09375	4.1875	0.09375	4.375
2017-12-08	16:00:00	2.90625	3.25	2.90625	2.75	2.90625	2.6875	2.90625	5.4375	2.90625	6.1875
2017-12-08	16:30:00	5.9375	5.1875	5.9375	2	5.9375	0	5.9375	5.3125	5.9375	2.125
2017-12-08	17:00:00	3.15625	5.875	3.15625	4.5625	3.15625	2.375	3.15625	7.5625	3.15625	1.3125
2017-12-08	17:30:00	0.84375	2.125	0.84375	8.3125	0.84375	0.375	0.84375	12.25	0.84375	0.5625
2017-12-08	18:00:00	2.5625	0.6875	2.5625	0.125	2.5625	7.4375	2.5625	5.25	2.5625	7.375
2017-12-08	18:30:00	5.96875	7.125	5.96875	0.8125	5.96875	9	5.96875	11.625	5.96875	5.875
2017-12-08	19:00:00	3.09375	12.25	3.09375	11.25	3.09375	6.625	3.09375	12.0625	3.09375	6.0625
2017-12-08	19:30:00	1.65625	10.375	1.65625	10.8125	1.65625	8.0625	1.65625	18.125	1.65625	11.6875
2017-12-08	20:00:00	4.6875	4	4.6875	9.625	4.6875	4.5625	4.6875	5.1875	4.6875	17.6875
2017-12-08	20:30:00	9.71875	6	9.71875	9.25	9.71875	3.125	9.71875	0.625	9.71875	13.375
2017-12-08	21:00:00	6.1875	21.125	6.1875	9.9375	6.1875	2.4375	6.1875	8.9375	6.1875	7.375
2017-12-08	21:30:00	19.375	26.3125	19.375	22.6875	19.375	10	19.375	19.6875	19.375	12.375
2017-12-08	22:00:00	28.875	31.875	28.875	25.625	28.875	35.8125	28.875	55.25	28.875	55.0625
2017-12-08	22:30:00	95.0938	65.5625	95.0938	87.9375	95.0938	72.0625	95.0938	80.1875	95.0938	76.9375
2017-12-08	23:00:00	53.125	33.4375	53.125	57.375	53.125	53.125	53.125	54.1875	53.125	44.9375
2017-12-08	23:30:00	28.6562	26.5625	28.6562	28.1875	28.6562	29	28.6562	47.6875	28.6562	31.5625
2017-12-09	00:00:00	14.5938	19.875	14.5938	22.0625	14.5938	16.625	14.5938	21.1875	14.5938	28.8125
2017-12-09	00:30:00	10.5938	8	10.5938	13.5	10.5938	14.3125	10.5938	23.0625	10.5938	11.1875
2017-12-09	01:00:00	9.78125	8.0625	9.78125	9	9.78125	10.6875	9.78125	13.25	9.78125	9.5625
2017-12-09	01:30:00	6.84375	2.4375	6.84375	11.625	6.84375	0.375	6.84375	9.125	6.84375	3.125
2017-12-09	02:00:00	2.875	3.5625	2.875	3.625	2.875	4.75	2.875	7	2.875	6.25
2017-12-09	02:30:00	3.28125	2.375	3.28125	5.3125	3.28125	8	3.28125	11.5625	3.28125	3.0625
2017-12-09	03:00:00	5.40625	1.75	5.40625	7.3125	5.40625	7.3125	5.40625	16	5.40625	4.5
2017-12-09	03:30:00	6.75	4.5	6.75	1.5	6.75	3.875	6.75	4.625	6.75	3.25
2017-12-09	04:00:00	3.96875	4.875	3.96875	2	3.96875	6.4375	3.96875	3.3125	3.96875	1
2017-12-09	04:30:00	4.84375	3.9375	4.84375	7.5	4.84375	4.6875	4.84375	5.375	4.84375	1.75
2017-12-09	05:00:00	5.78125	5.375	5.78125	7.4375	5.78125	11.75	5.78125	9.0625	5.78125	5.25
2017-12-09	05:30:00	23.8125	9.6875	23.8125	17.125	23.8125	17.125	23.8125	17.8125	23.8125	6.9375
2017-12-09	06:00:00	25.5938	11.125	25.5938	23.875	25.5938	14.125	25.5938	26.3125	25.5938	15.5625
2017-12-09	06:30:00	29.875	10.75	29.875	34.375	29.875	31.9375	29.875	24.3125	29.875	22.6875
2017-12-09	07:00:00	32.125	11.75	32.125	36.375	32.125	25.9375	32.125	45.0625	32.125	28.3125
2017-12-09	07:30:00	41.5	24.4375	41.5	38.5625	41.5	44.8125	41.5	42.125	41.5	34.125
2017-12-09	08:00:00	49.6562	35.9375	49.6562	45.8125	49.6562	46.25	49.6562	47.875	49.6562	29.75
2017-12-09	08:30:00	63	48.4375	63	53.125	63	49.9375	63	52.375	63	45.0625
2017-12-09	09:00:00	69.4688	53.5	69.4688	63.5	69.4688	56.3125	69.4688	58.125	69.4688	62.25
2017-12-09	09:30:00	76.75	54.125	76.75	73.375	76.75	66.9375	76.75	64.875	76.75	71.5
2017-12-09	10:00:00	84.4688	55.8125	84.4688	77.6875	84.4688	71.3125	84.4688	63.375	84.4688	71
2017-12-09	10:30:00	52.5312	62.5	52.5312	53.9375	52.5312	54.1875	52.5312	49.75	52.5312	66.375
2017-12-09	11:00:00	3.5	17.375	3.5	6.875	3.5	4.125	3.5	6.1875	3.5	8.0625
2017-12-09	11:30:00	5.71875	7.6875	5.71875	2.8125	5.71875	1.0625	5.71875	2.75	5.71875	1.5625
2017-12-09	12:00:00	4.71875	3.5	4.71875	1.875	4.71875	2	4.71875	5.75	4.71875	0
2017-12-09	12:30:00	4.46875	3.5625	4.46875	3.8125	4.46875	1.1875	4.46875	0.25	4.46875	1.3125
2017-12-09	13:00:00	5.21875	0.125	5.21875	4.625	5.21875	4.1875	5.21875	1.6875	5.21875	0.0625
2017-12-09	13:30:00	3.5	1.375	3.5	5.625	3.5	3.8125	3.5	0.5625	3.5	0.4375
2017-12-09	14:00:00	2.34375	5.3125	2.34375	7.0625	2.34375	2.75	2.34375	6.3125	2.34375	0.125
2017-12-09	14:30:00	5.875	6.4375	5.875	10.375	5.875	9.0625	5.875	9.75	5.875	1.5
2017-12-09	15:00:00	2.78125	1.375	2.78125	8.1875	2.78125	6.125	2.78125	2.5	2.78125	6.375
2017-12-09	15:30:00	4.21875	2.3125	4.21875	12	4.21875	3.3125	4.21875	2.3125	4.21875	8.8125
2017-12-09	16:00:00	5.96875	3.125	5.96875	16.5	5.96875	7.375	5.96875	6.3125	5.96875	2.4375
2017-12-09	16:30:00	5.625	2.375	5.625	10.4375	5.625	2.8125	5.625	23.125	5.625	0.8125
2017-12-09	17:00:00	4.875	4.5625	4.875	12.9375	4.875	5.875	4.875	12.0625	4.875	4.625
2017-12-09	17:30:00	5.78125	5.75	5.78125	12.5625	5.78125	5.625	5.78125	13.25	5.78125	0.9375
2017-12-09	18:00:00	4.5	2.9375	4.5	8.5625	4.5	3.75	4.5	5.6875	4.5	0.9375
2017-12-09	18:30:00	2.46875	13.1875	2.46875	11.0625	2.46875	5.625	2.46875	9.125	2.46875	0.125
2017-12-09	19:00:00	2.3125	1.0625	2.3125	21.8125	2.3125	10.625	2.3125	3.3125	2.3125	7.5625
2017-12-09	19:30:00	4.34375	18.4375	4.34375	12.625	4.34375	5.6875	4.34375	7.125	4.34375	16.125
2017-12-09	20:00:00	3.84375	8.4375	3.84375	0.75	3.84375	0.8125	3.84375	12.375	3.84375	12.625
2017-12-09	20:30:00	8.25	20.875	8.25	3.625	8.25	5	8.25	1.25	8.25	14.6875
2017-12-09	21:00:00	6.25	11.1875	6.25	14.5	6.25	9	6.25	10.6875	6.25	22.625
2017-12-09	21:30:00	27	26.5	27	36.4375	27	8.9375	27	25.1875	27	10.9375
2017-12-09	22:00:00	31.3125	31	31.3125	27.75	31.3125	29.875	31.3125	37.25	31.3125	31.0625
2017-12-09	22:30:00	87.5625	60.75	87.5625	85.75	87.5625	67.5	87.5625	74	87.5625	81.375
2017-12-09	23:00:00	48.4062	46.3125	48.4062	45.6875	48.4062	34.375	48.4062	42	48.4062	39.5625
2017-12-09	23:30:00	21.7812	32.5	21.7812	32.1875	21.7812	29.25	21.7812	24.5625	21.7812	34.0625
2017-12-10	00:00:00	15.5938	14.5625	15.5938	15.375	15.5938	21.4375	15.5938	18.875	15.5938	9.5
2017-12-10	00:30:00	6.8125	13.8125	6.8125	11.5625	6.8125	16.5625	6.8125	11.875	6.8125	9.125
2017-12-10	01:00:00	8.65625	5.3125	8.65625	7.25	8.65625	5.1875	8.65625	13	8.65625	9.125
2017-12-10	01:30:00	7.75	2.375	7.75	5.375	7.75	4.625	7.75	11.4375	7.75	4.9375
2017-12-10	02:00:00	2.09375	0.625	2.09375	9.375	2.09375	5.4375	2.09375	16.375	2.09375	7.5625
2017-12-10	02:30:00	2.5625	5.375	2.5625	5.3125	2.5625	4.25	2.5625	12.3125	2.5625	6.0625
2017-12-10	03:00:00	2.125	8.1875	2.125	11.0625	2.125	4.875	2.125	5.625	2.125	5
2017-12-10	03:30:00	4.40625	3.375	4.40625	9.625	4.40625	2.625	4.40625	6.3125	4.40625	3.125
2017-12-10	04:00:00	2.03125	0.4375	2.03125	3.5625	2.03125	3.375	2.03125	7.1875	2.03125	0.25
2017-12-10	04:30:00	2.71875	2.625	2.71875	8.0625	2.71875	8.5	2.71875	12.75	2.71875	0.4375
2017-12-10	05:00:00	9.15625	4.375	9.15625	11.375	9.15625	8.8125	9.15625	12.25	9.15625	1.5
2017-12-10	05:30:00	17.5625	4.9375	17.5625	31.6875	17.5625	17.1875	17.5625	14.3125	17.5625	12.125
2017-12-10	06:00:00	24.9062	9.9375	24.9062	47.125	24.9062	24.25	24.9062	24.5	24.9062	18.375
2017-12-10	06:30:00	34.1875	18.6875	34.1875	37.625	34.1875	37.3125	34.1875	35.875	34.1875	20.1875
2017-12-10	07:00:00	34.4062	15.5	34.4062	38.3125	34.4062	44.8125	34.4062	35.375	34.4062	21.8125
2017-12-10	07:30:00	41.7812	22.3125	41.7812	36	41.7812	39.25	41.7812	35.9375	41.7812	38.625
2017-12-10	08:00:00	50.8125	31.0625	50.8125	44.5	50.8125	49.875	50.8125	47.5625	50.8125	46.0625
2017-12-10	08:30:00	58.3125	47.3125	58.3125	43.3125	58.3125	54.125	58.3125	48.0625	58.3125	51.1875
2017-12-10	09:00:00	66.9688	48.125	66.9688	62.625	66.9688	59.8125	66.9688	56.9375	66.9688	55.625
2017-12-10	09:30:00	75.625	53	75.625	70.9375	75.625	63.75	75.625	58.5625	75.625	62.75
2017-12-10	10:00:00	78.2812	55	78.2812	77.375	78.2812	73.75	78.2812	64.625	78.2812	66.875
2017-12-10	10:30:00	47.7812	60.375	47.7812	62.0625	47.7812	50.6875	47.7812	49.6875	47.7812	56.6875
2017-12-10	11:00:00	2.28125	19.5	2.28125	11.875	2.28125	4.75	2.28125	12	2.28125	4.6875
2017-12-10	11:30:00	1.1875	2.875	1.1875	4.625	1.1875	6	1.1875	5.3125	1.1875	5.6875
2017-12-10	12:00:00	0.78125	0.875	0.78125	2.6875	0.78125	2.625	0.78125	4.9375	0.78125	1.9375
2017-12-10	12:30:00	2.40625	1.375	2.40625	4.9375	2.40625	1.125	2.40625	6.1875	2.40625	0.0625
2017-12-10	13:00:00	0.4375	0.4375	0.4375	6.3125	0.4375	3	0.4375	2.3125	0.4375	2.25
2017-12-10	13:30:00	0.375	0.625	0.375	3.875	0.375	0.125	0.375	4.375	0.375	0.625
2017-12-10	14:00:00	0.75	7.25	0.75	6.75	0.75	4.875	0.75	5.8125	0.75	1.625
2017-12-10	14:30:00	3	7.5	3	8	3	2.1875	3	8.9375	3	1.75
2017-12-10	15:00:00	2.0625	2.6875	2.0625	5.4375	2.0625	2.4375	2.0625	5.875	2.0625	6.25
2017-12-10	15:30:00	0.6875	4.875	0.6875	1.1875	0.6875	20.9375	0.6875	5.4375	0.6875	0
2017-12-10	16:00:00	1.9375	11.1875	1.9375	3.125	1.9375	6	1.9375	5	1.9375	9.875
2017-12-10	16:30:00	1.9375	6.625	1.9375	7.4375	1.9375	9.6875	1.9375	0.9375	1.9375	0.1875
2017-12-10	17:00:00	1.625	7.25	1.625	8.25	1.625	7.3125	1.625	1.8125	1.625	2.6875
2017-12-10	17:30:00	10.8438	1.5	10.8438	21	10.8438	0.4375	10.8438	11.0625	10.8438	4.875
2017-12-10	18:00:00	2.40625	0	2.40625	10.3125	2.40625	5.5	2.40625	9.5625	2.40625	1.5
2017-12-10	18:30:00	2.0625	4.5625	2.0625	2.125	2.0625	5.625	2.0625	9.4375	2.0625	2.9375
2017-12-10	19:00:00	4.40625	12	4.40625	4.6875	4.40625	5.75	4.40625	11.125	4.40625	11.0625
2017-12-10	19:30:00	8.5	11.0625	8.5	8.125	8.5	9.125	8.5	6.875	8.5	9.375
2017-12-10	20:00:00	5.96875	9.8125	5.96875	4.3125	5.96875	6.1875	5.96875	5.5	5.96875	9.5
2017-12-10	20:30:00	12.5625	6.9375	12.5625	1.1875	12.5625	2.875	12.5625	2.8125	12.5625	4.4375
2017-12-10	21:00:00	5.28125	16.3125	5.28125	14.75	5.28125	3.1875	5.28125	10.875	5.28125	16.4375
2017-12-10	21:30:00	16.75	21.375	16.75	22.75	16.75	16	16.75	36.8125	16.75	21.8125
2017-12-10	22:00:00	34.3125	31.25	34.3125	27.5	34.3125	33.875	34.3125	20.3125	34.3125	35.9375
2017-12-10	22:30:00	82.625	67.5625	82.625	91.0625	82.625	80.0625	82.625	72.625	82.625	73.5625
2017-12-10	23:00:00	48.4375	36.625	48.4375	47.875	48.4375	36.1875	48.4375	39.9375	48.4375	37.125
2017-12-10	23:30:00	23.375	28.4375	23.375	41.4375	23.375	27.25	23.375	27.0625	23.375	20.4375
2017-12-11	00:00:00	12.75	12.5625	12.75	15.3125	12.75	18.5625	12.75	21.375	12.75	11.4375
2017-12-11	00:30:00	6.59375	10.8125	6.59375	3.1875	6.59375	24.6875	6.59375	16.3125	6.59375	9.25
2017-12-11	01:00:00	8.6875	6.6875	8.6875	7.0625	8.6875	10.75	8.6875	15.5	8.6875	5.9375
2017-12-11	01:30:00	6.625	5.5	6.625	5.5625	6.625	4.3125	6.625	11.3125	6.625	2.1875
2017-12-11	02:00:00	4.03125	0.5625	4.03125	0.5625	4.03125	1.0625	4.03125	7.8125	4.03125	2.3125
2017-12-11	02:30:00	6.1875	3.25	6.1875	1.375	6.1875	2.6875	6.1875	9.6875	6.1875	4.25
2017-12-11	03:00:00	3.28125	2.625	3.28125	4.625	3.28125	2.8125	3.28125	7.625	3.28125	2.625
2017-12-11	03:30:00	3.84375	1	3.84375	2.875	3.84375	4.3125	3.84375	6.0625	3.84375	1.5
2017-12-11	04:00:00	3.09375	1.5	3.09375	5.3125	3.09375	5.375	3.09375	11.1875	3.09375	0.1875
2017-12-11	04:30:00	4.8125	0.9375	4.8125	2.375	4.8125	7.1875	4.8125	9.8125	4.8125	3.125
2017-12-11	05:00:00	8.03125	2.875	8.03125	9.5625	8.03125	3.3125	8.03125	10.875	8.03125	3.25
2017-12-11	05:30:00	14.7812	5.75	14.7812	25.5	14.7812	15	14.7812	23.125	14.7812	6.9375
2017-12-11	06:00:00	29.0312	7.8125	29.0312	22.75	29.0312	20.4375	29.0312	15.875	29.0312	23.625
2017-12-11	06:30:00	34.0312	15.5	34.0312	27.0625	34.0312	23.5	34.0312	28.9375	34.0312	22.1875
2017-12-11	07:00:00	34.0312	14.0625	34.0312	32.375	34.0312	35.9375	34.0312	31.875	34.0312	28.3125
2017-12-11	07:30:00	42.3125	26.3125	42.3125	33.6875	42.3125	40.1875	42.3125	32.9375	42.3125	42.4375
2017-12-11	08:00:00	51.1562	36.125	51.1562	44.6875	51.1562	49.625	51.1562	40.375	51.1562	43.875
2017-12-11	08:30:00	53.0312	45	53.0312	56.625	53.0312	52.875	53.0312	49.5625	53.0312	51.3125
2017-12-11	09:00:00	64.75	59.6875	64.75	67.1875	64.75	61.0625	64.75	50.125	64.75	59.625
2017-12-11	09:30:00	71.375	56.9375	71.375	74.3125	71.375	70.3125	71.375	54.375	71.375	64.6875
2017-12-11	10:00:00	76.5	55	76.5	68.4375	76.5	68.5	76.5	57.9375	76.5	63.4375
2017-12-11	10:30:00	42.0938	62	42.0938	54.875	42.0938	44.5	42.0938	47.3125	42.0938	62.375
2017-12-11	11:00:00	2.65625	10.6875	2.65625	12.125	2.65625	6.125	2.65625	2.375	2.65625	5.6875
2017-12-11	11:30:00	0.5	1.5625	0.5	2.375	0.5	2.9375	0.5	2.1875	0.5	0.5625
2017-12-11	12:00:00	0.46875	3.375	0.46875	1.5	0.46875	2.375	0.46875	1.25	0.46875	2.1875
2017-12-11	12:30:00	0.28125	0.4375	0.28125	3.8125	0.28125	0.0625	0.28125	4.5	0.28125	0.8125
2017-12-11	13:00:00	2.1875	2.875	2.1875	0.25	2.1875	1.5625	2.1875	0	2.1875	1.25
2017-12-11	13:30:00	1.0625	5.0625	1.0625	0.1875	1.0625	1.6875	1.0625	0.4375	1.0625	1.5
2017-12-11	14:00:00	1.09375	4.125	1.09375	0.1875	1.09375	0.125	1.09375	3.5625	1.09375	1.3125
2017-12-11	14:30:00	4.59375	4.5	4.59375	8.875	4.59375	1.0625	4.59375	5.5	4.59375	0.6875
2017-12-11	15:00:00	1.0625	8.75	1.0625	3.625	1.0625	0.8125	1.0625	11.25	1.0625	1.8125
2017-12-11	15:30:00	1.25	11.3125	1.25	1	1.25	1.875	1.25	6.4375	1.25	0.3125
2017-12-11	16:00:00	7.0625	8.4375	7.0625	1.5625	7.0625	4.1875	7.0625	12.625	7.0625	7.5625
2017-12-11	16:30:00	3.6875	5.875	3.6875	10.25	3.6875	1.4375	3.6875	8.625	3.6875	1.4375
2017-12-11	17:00:00	1.125	8.75	1.125	2.625	1.125	7.5625	1.125	1.9375	1.125	7.3125
2017-12-11	17:30:00	2.875	18.5625	2.875	6.5625	2.875	9.875	2.875	7.8125	2.875	5.375
2017-12-11	18:00:00	3.59375	10	3.59375	5.875	3.59375	10.25	3.59375	16.5	3.59375	3.3125
2017-12-11	18:30:00	6.1875	10.375	6.1875	8.8125	6.1875	7.5	6.1875	10.875	6.1875	0.6875
2017-12-11	19:00:00	7	18	7	2.6875	7	2.0625	7	5.875	7	10.3125
2017-12-11	19:30:00	7.3125	18	7.3125	10.125	7.3125	9.3125	7.3125	5	7.3125	5.125
2017-12-11	20:00:00	6.09375	4.9375	6.09375	12.1875	6.09375	3.4375	6.09375	10.5	6.09375	9.9375
2017-12-11	20:30:00	3.0625	8.1875	3.0625	4.25	3.0625	6.4375	3.0625	1.4375	3.0625	7.375
2017-12-11	21:00:00	10.0625	9.3125	10.0625	17.375	10.0625	4.5625	10.0625	9.5625	10.0625	4.1875
2017-12-11	21:30:00	14.8438	24.3125	14.8438	32.375	14.8438	10.6875	14.8438	20	14.8438	17.125
2017-12-11	22:00:00	24.75	20.375	24.75	33.125	24.75	22.125	24.75	34.3125	24.75	32.625
2017-12-11	22:30:00	79.2188	64.125	79.2188	72.5	79.2188	69.8125	79.2188	60.5625	79.2188	64.5
2017-12-11	23:00:00	39.25	38.9375	39.25	44.8125	39.25	41.5625	39.25	36.6875	39.25	31.25
2017-12-11	23:30:00	20.0312	24.375	20.0312	21.75	20.0312	19.75	20.0312	35.5	20.0312	19
2017-12-12	00:00:00	11.375	3.375	11.375	8	11.375	12.8125	11.375	14.0625	11.375	21.9375
2017-12-12	00:30:00	4.625	10.5625	4.625	1.75	4.625	4.875	4.625	14.5	4.625	10.625
2017-12-12	01:00:00	4.96875	8.3125	4.96875	7.25	4.96875	9.5	4.96875	10.0625	4.96875	5.9375
2017-12-12	01:30:00	2.5	4.5625	2.5	3.0625	2.5	5.0625	2.5	8.5	2.5	0.375
2017-12-12	02:00:00	3.4375	0.6875	3.4375	1.8125	3.4375	4.25	3.4375	4.25	3.4375	1.9375
2017-12-12	02:30:00	3	1.5625	3	5.75	3	4.1875	3	10.375	3	4.4375
2017-12-12	03:00:00	3.96875	1.1875	3.96875	7.875	3.96875	1.3125	3.96875	9.625	3.96875	4.375
2017-12-12	03:30:00	2.0625	0.75	2.0625	11.3125	2.0625	5.625	2.0625	3.8125	2.0625	2.625
2017-12-12	04:00:00	4.875	2.6875	4.875	2.5	4.875	3.1875	4.875	5.4375	4.875	6.5625
2017-12-12	04:30:00	2.15625	4.1875	2.15625	6.25	2.15625	10.5	2.15625	9.4375	2.15625	5.125
2017-12-12	05:00:00	5.625	4.9375	5.625	8.1875	5.625	5.9375	5.625	11.5	5.625	3.5
2017-12-12	05:30:00	8.53125	8.9375	8.53125	10.0625	8.53125	14.5	8.53125	12.375	8.53125	6.75
2017-12-12	06:00:00	21.375	10.5625	21.375	26.75	21.375	17.5625	21.375	22.75	21.375	13.8125
2017-12-12	06:30:00	28.125	23.5625	28.125	47.9375	28.125	31.6875	28.125	29.1875	28.125	26.8125
2017-12-12	07:00:00	34.7812	22.1875	34.7812	44.8125	34.7812	35.4375	34.7812	30.8125	34.7812	24.6875
2017-12-12	07:30:00	43.4375	22	43.4375	30.5625	43.4375	45.0625	43.4375	34	43.4375	30
2017-12-12	08:00:00	48	36.25	48	41.4375	48	42.9375	48	41.3125	48	45.375
2017-12-12	08:30:00	53.9375	52.0625	53.9375	56.5625	53.9375	54	53.9375	50.125	53.9375	53.1875
2017-12-12	09:00:00	66.5312	52.6875	66.5312	62.6875	66.5312	54.5625	66.5312	52.9375	66.5312	60.25
2017-12-12	09:30:00	67.0625	52.75	67.0625	69.9375	67.0625	61.6875	67.0625	56.375	67.0625	59.1875
2017-12-12	10:00:00	73.5	65	73.5	74.4375	73.5	61.8125	73.5	55.5625	73.5	59.5
2017-12-12	10:30:00	43.9688	57.9375	43.9688	46.5625	43.9688	40.5	43.9688	39.25	43.9688	54.25
2017-12-12	11:00:00	1.5625	10.5625	1.5625	5.875	1.5625	8	1.5625	4.875	1.5625	4
2017-12-12	11:30:00	0.84375	0	0.84375	4.875	0.84375	9.8125	0.84375	3.5625	0.84375	1.25
2017-12-12	12:00:00	0.84375	50.3125	0.84375	2.375	0.84375	4.75	0.84375	0.125	0.84375	0.3125
2017-12-12	12:30:00	0.09375	5.75	0.09375	0.5	0.09375	2.375	0.09375	0.9375	0.09375	2.75
2017-12-12	13:00:00	1.21875	0.5	1.21875	1.1875	1.21875	0.4375	1.21875	2.6875	1.21875	0.5625
2017-12-12	13:30:00	3.96875	8.375	3.96875	0	3.96875	7.9375	3.96875	6.1875	3.96875	2.5
2017-12-12	14:00:00	1.65625	0.375	1.65625	11.75	1.65625	0	1.65625	0.6875	1.65625	0.3125
2017-12-12	14:30:00	3.34375	7.1875	3.34375	1.125	3.34375	3.875	3.34375	0	3.34375	4.625
2017-12-12	15:00:00	1.53125	1	1.53125	0.4375	1.53125	0.3125	1.53125	4.25	1.53125	1
2017-12-12	15:30:00	37.5938	24.125	37.5938	26.6875	37.5938	0	37.5938	54.4375	37.5938	30.4375
2017-12-12	16:00:00	1.4375	3.25	1.4375	2.875	1.4375	25.1875	1.4375	4.4375	1.4375	2.5
2017-12-12	16:30:00	0.96875	1.6875	0.96875	1.25	0.96875	2.0625	0.96875	0.75	0.96875	0.5
2017-12-12	17:00:00	3.65625	7.9375	3.65625	0.9375	3.65625	3.0625	3.65625	0	3.65625	0.625
2017-12-12	17:30:00	16.9375	20.3125	16.9375	18.3125	16.9375	26.1875	16.9375	0	16.9375	8.875
2017-12-12	18:00:00	8.75	4.1875	8.75	5.6875	8.75	0.9375	8.75	5.0625	8.75	2.1875
2017-12-12	18:30:00	2.8125	4.75	2.8125	0	2.8125	2.3125	2.8125	4.8125	2.8125	6
2017-12-12	19:00:00	2.21875	3.6875	2.21875	5.4375	2.21875	0.3125	2.21875	1.0625	2.21875	3.6875
2017-12-12	19:30:00	32.7188	7.75	32.7188	11.75	32.7188	4.9375	32.7188	20.0625	32.7188	49.875
2017-12-12	20:00:00	2.84375	18.75	2.84375	6.5625	2.84375	0.0625	2.84375	6.875	2.84375	16.375
2017-12-12	20:30:00	7.96875	9.0625	7.96875	7.6875	7.96875	11.3125	7.96875	1.1875	7.96875	0.1875
2017-12-12	21:00:00	4.5625	3.6875	4.5625	7.9375	4.5625	18.125	4.5625	13.375	4.5625	5.75
2017-12-12	21:30:00	11.1875	5.375	11.1875	11.5	11.1875	6.875	11.1875	23.5625	11.1875	18.375
2017-12-12	22:00:00	27.9375	12.5	27.9375	18.4375	27.9375	8.1875	27.9375	20.75	27.9375	23.6875
2017-12-12	22:30:00	25.9062	12.375	25.9062	5.25	25.9062	14.75	25.9062	19.5	25.9062	21.625
2017-12-12	23:00:00	26.7812	18.125	26.7812	13.8125	26.7812	7.625	26.7812	19.1875	26.7812	26.6875
2017-12-12	23:30:00	26.625	24.8125	26.625	3.5	26.625	21.0625	26.625	19.875	26.625	15.0625
2017-12-13	00:00:00	19.8125	21.1875	19.8125	14.625	19.8125	12.125	19.8125	15.625	19.8125	13.5
2017-12-13	00:30:00	14.625	24.125	14.625	14.25	14.625	13.75	14.625	15.8125	14.625	17.1875
2017-12-13	01:00:00	14.6875	24.0625	14.6875	34.3125	14.6875	17.75	14.6875	10.5	14.6875	14.6875
2017-12-13	01:30:00	13.4062	21.625	13.4062	16.25	13.4062	10	13.4062	17.8125	13.4062	11.1875
2017-12-13	02:00:00	14.9375	16.8125	14.9375	23	14.9375	14.5625	14.9375	16.8125	14.9375	13.625
2017-12-13	02:30:00	16.9062	9	16.9062	14.1875	16.9062	14	16.9062	12.375	16.9062	17.375
2017-12-13	03:00:00	13.7188	12.3125	13.7188	11.125	13.7188	13.8125	13.7188	26.75	13.7188	21.6875
2017-12-13	03:30:00	20.4375	8.125	20.4375	23.0625	20.4375	10.125	20.4375	17.5	20.4375	17.6875
2017-12-13	04:00:00	16.9375	13.5625	16.9375	13.8125	16.9375	22.3125	16.9375	21.125	16.9375	21.625
2017-12-13	04:30:00	28.875	18.9375	28.875	12.125	28.875	15.9375	28.875	22.25	28.875	33.25
2017-12-13	05:00:00	23.4375	14.5625	23.4375	10.9375	23.4375	21.125	23.4375	16.5625	23.4375	29.5
2017-12-13	05:30:00	24	8.125	24	15	24	17.8125	24	23.9375	24	19.875
2017-12-13	06:00:00	30.0312	26.375	30.0312	16.25	30.0312	15.8125	30.0312	27.1875	30.0312	23.875
2017-12-13	06:30:00	22.3125	27.5	22.3125	22.8125	22.3125	16.9375	22.3125	22.5625	22.3125	36.875
2017-12-13	07:00:00	29.75	20	29.75	15.375	29.75	23.4375	29.75	28.25	29.75	30.0625
2017-12-13	07:30:00	26.625	32.1875	26.625	19.4375	26.625	23.5	26.625	25.875	26.625	25.125
2017-12-13	08:00:00	31.3125	36	31.3125	29.9375	31.3125	22.5625	31.3125	31	31.3125	40.0625
2017-12-13	08:30:00	24.2812	32.25	24.2812	25.5	24.2812	25.5	24.2812	31.4375	24.2812	22.0625
2017-12-13	09:00:00	22.6562	35.625	22.6562	32.125	22.6562	31.1875	22.6562	21.625	22.6562	17.75
2017-12-13	09:30:00	21.75	33.75	21.75	29.625	21.75	21.5	21.75	20.625	21.75	10.0625
2017-12-13	10:00:00	20.2812	50.25	20.2812	23.75	20.2812	19.5	20.2812	10.8125	20.2812	1.8125
2017-12-13	10:30:00	14.5938	34.6875	14.5938	25.875	14.5938	37.125	14.5938	8.9375	14.5938	0
2017-12-13	11:00:00	9.40625	37.875	9.40625	22.0625	9.40625	37.25	9.40625	4.75	9.40625	2.25
2017-12-13	11:30:00	4.71875	40.0625	4.71875	28.625	4.71875	29.3125	4.71875	8.9375	4.71875	5.8125
2017-12-13	12:00:00	1.28125	34.125	1.28125	26.8125	1.28125	29.125	1.28125	1.3125	1.28125	13.0625
2017-12-13	12:30:00	3.25	17.5	3.25	30.25	3.25	29.875	3.25	8.4375	3.25	6.25
2017-12-13	13:00:00	2.28125	16.5625	2.28125	18.3125	2.28125	28.375	2.28125	0.75	2.28125	3.4375
2017-12-13	13:30:00	1	13.75	1	33.625	1	18.4375	1	9.625	1	1.25
2017-12-13	14:00:00	1.8125	7.5	1.8125	25.8125	1.8125	12.25	1.8125	7.5	1.8125	4.5
2017-12-13	14:30:00	16.4062	12.125	16.4062	26.0625	16.4062	16.625	16.4062	14.5	16.4062	11.9375
2017-12-13	15:00:00	11.625	2.3125	11.625	12.9375	11.625	6.75	11.625	3.875	11.625	1.9375
2017-12-13	15:30:00	1.4375	1.9375	1.4375	1.6875	1.4375	0	1.4375	2.5625	1.4375	5.25
2017-12-13	16:00:00	1.09375	0	1.09375	1.75	1.09375	1.1875	1.09375	4.9375	1.09375	5.25
2017-12-13	16:30:00	1.21875	8	1.21875	2.875	1.21875	5.3125	1.21875	7.9375	1.21875	0.1875
2017-12-13	17:00:00	3.96875	9.1875	3.96875	3.875	3.96875	3.0625	3.96875	0.4375	3.96875	10.6875
2017-12-13	17:30:00	2.8125	3.0625	2.8125	2.9375	2.8125	0.0625	2.8125	10.25	2.8125	8.25
2017-12-13	18:00:00	2.34375	6.9375	2.34375	8.125	2.34375	9.75	2.34375	5.3125	2.34375	5.9375
2017-12-13	18:30:00	3.53125	3.75	3.53125	8.9375	3.53125	9.3125	3.53125	2.125	3.53125	5.75
2017-12-13	19:00:00	3.9375	6.5625	3.9375	4.375	3.9375	9	3.9375	14.0625	3.9375	11.125
2017-12-13	19:30:00	7.15625	1.4375	7.15625	4.25	7.15625	0	7.15625	13.4375	7.15625	12.375
2017-12-13	20:00:00	6.5625	4.4375	6.5625	0	6.5625	7.125	6.5625	13.0625	6.5625	18.9375
2017-12-13	20:30:00	8.15625	7.125	8.15625	6	8.15625	8.8125	8.15625	11.875	8.15625	21.75
2017-12-13	21:00:00	12.375	6	12.375	10.0625	12.375	4.8125	12.375	22.5625	12.375	23.75
2017-12-13	21:30:00	19.8125	11.3125	19.8125	3.75	19.8125	6.4375	19.8125	21.875	19.8125	9.875
2017-12-13	22:00:00	20.7812	11.8125	20.7812	7.4375	20.7812	3	20.7812	13.4375	20.7812	9.25
2017-12-13	22:30:00	22.625	2.6875	22.625	7.9375	22.625	12.4375	22.625	14.0625	22.625	18
2017-12-13	23:00:00	19.25	14.9375	19.25	3.75	19.25	12.375	19.25	13.25	19.25	10.4375
2017-12-13	23:30:00	12.4688	10.125	12.4688	7.3125	12.4688	9.625	12.4688	10.125	12.4688	10.6875
2017-12-14	00:00:00	14.5312	10.125	14.5312	8.375	14.5312	11.1875	14.5312	14.375	14.5312	20.875
2017-12-14	00:30:00	9.46875	19.875	9.46875	6.5625	9.46875	7.75	9.46875	17.0625	9.46875	13.8125
2017-12-14	01:00:00	11.0625	21.0625	11.0625	17.8125	11.0625	17.6875	11.0625	8.4375	11.0625	10.25
2017-12-14	01:30:00	15.5	12.25	15.5	12.0625	15.5	11.3125	15.5	17.375	15.5	15.25
2017-12-14	02:00:00	14.25	22.875	14.25	24.1875	14.25	12.75	14.25	22.375	14.25	18.875
2017-12-14	02:30:00	16.375	12.0625	16.375	12.75	16.375	15.6875	16.375	16.4375	16.375	17.75
2017-12-14	03:00:00	22.3125	17.9375	22.3125	8.0625	22.3125	19.8125	22.3125	20.5	22.3125	25.375
2017-12-14	03:30:00	32.4062	13.5	32.4062	23.625	32.4062	16.4375	32.4062	32.0625	32.4062	16.875
2017-12-14	04:00:00	20.9688	20.8125	20.9688	17.875	20.9688	19.375	20.9688	21.0625	20.9688	24.1875
2017-12-14	04:30:00	21.5625	22.3125	21.5625	10.25	21.5625	11.75	21.5625	22.8125	21.5625	26.875
2017-12-14	05:00:00	26.4688	25.9375	26.4688	14.1875	26.4688	21.9375	26.4688	25.9375	26.4688	25.75
2017-12-14	05:30:00	23.4062	30.0625	23.4062	18.75	23.4062	14	23.4062	28.25	23.4062	22.4375
2017-12-14	06:00:00	27.7188	18.875	27.7188	24.75	27.7188	16.75	27.7188	29.875	27.7188	31.75
2017-12-14	06:30:00	28.5	34.9375	28.5	10	28.5	22.3125	28.5	30.625	28.5	24.8125
2017-12-14	07:00:00	27.7812	27.375	27.7812	16.75	27.7812	22.0625	27.7812	31	27.7812	28.1875
2017-12-14	07:30:00	20.9062	29.125	20.9062	21.625	20.9062	23.25	20.9062	31.4375	20.9062	19.875
2017-12-14	08:00:00	18.6875	29.4375	18.6875	23.5625	18.6875	28.4375	18.6875	25.5	18.6875	15.875
2017-12-14	08:30:00	29.3438	27.375	29.3438	21.5	29.3438	15.125	29.3438	11.8125	29.3438	5
2017-12-14	09:00:00	19.9062	29.375	19.9062	22.5	19.9062	35.0625	19.9062	8.375	19.9062	13.375
2017-12-14	09:30:00	16.5	35.625	16.5	37.75	16.5	27.625	16.5	8.625	16.5	7.3125
2017-12-14	10:00:00	6.96875	48.25	6.96875	24.8125	6.96875	31.3125	6.96875	13.0625	6.96875	0.375
2017-12-14	10:30:00	4.3125	40.25	4.3125	27.0625	4.3125	34.6875	4.3125	4.6875	4.3125	0
2017-12-14	11:00:00	3.0625	31.125	3.0625	24.5	3.0625	35.6875	3.0625	5.9375	3.0625	0.3125
2017-12-14	11:30:00	1.875	24.75	1.875	28.5	1.875	34.25	1.875	4.1875	1.875	3.625
2017-12-14	12:00:00	4.59375	20.25	4.59375	26	4.59375	22.25	4.59375	2.9375	4.59375	5.9375
2017-12-14	12:30:00	3.3125	14.125	3.3125	26.8125	3.3125	16.75	3.3125	14.4375	3.3125	10.125
2017-12-14	13:00:00	2.0625	9.8125	2.0625	23.125	2.0625	14.5	2.0625	4.75	2.0625	2.3125
2017-12-14	13:30:00	0.96875	6.5	0.96875	12.625	0.96875	13	0.96875	4.875	0.96875	3.8125
2017-12-14	14:00:00	2.875	14.75	2.875	9.625	2.875	1.3125	2.875	5.5	2.875	0.5625
2017-12-14	14:30:00	15.5	12.1875	15.5	13.875	15.5	20.3125	15.5	9.875	15.5	9.0625
2017-12-14	15:00:00	1.65625	5.1875	1.65625	6.75	1.65625	8.5	1.65625	4.75	1.65625	1.4375
2017-12-14	15:30:00	3.25	1.75	3.25	3.625	3.25	8.875	3.25	8.9375	3.25	6.6875
2017-12-14	16:00:00	1.84375	0.375	1.84375	0	1.84375	2	1.84375	10.5	1.84375	3
2017-12-14	16:30:00	0.78125	1.3125	0.78125	0	0.78125	3.0625	0.78125	0.1875	0.78125	4.9375
2017-12-14	17:00:00	6.3125	4.1875	6.3125	3.6875	6.3125	3.1875	6.3125	5.375	6.3125	8.25
2017-12-14	17:30:00	5.84375	3.125	5.84375	2.6875	5.84375	0.0625	5.84375	13.625	5.84375	11.5625
2017-12-14	18:00:00	2.875	4.25	2.875	0.75	2.875	2.75	2.875	6.3125	2.875	10
2017-12-14	18:30:00	5.3125	5.8125	5.3125	7.8125	5.3125	3.625	5.3125	9.9375	5.3125	10.0625
2017-12-14	19:00:00	3.5	0.1875	3.5	0	3.5	8.5	3.5	13.9375	3.5	17.0625
2017-12-14	19:30:00	8.6875	7.6875	8.6875	12.4375	8.6875	2.6875	8.6875	12.9375	8.6875	19.9375
2017-12-14	20:00:00	7.75	18.75	7.75	0.75	7.75	8.5625	7.75	16.375	7.75	18.4375
2017-12-14	20:30:00	10.9375	5.0625	10.9375	4.5625	10.9375	6.875	10.9375	11	10.9375	12.25
2017-12-14	21:00:00	16.4062	7.9375	16.4062	2.375	16.4062	5.1875	16.4062	9.8125	16.4062	11.75
2017-12-14	21:30:00	19.2188	1.1875	19.2188	2.1875	19.2188	8.0625	19.2188	13.6875	19.2188	12.6875
2017-12-14	22:00:00	12.4688	8.1875	12.4688	2.75	12.4688	3.875	12.4688	13.5625	12.4688	16.3125
2017-12-14	22:30:00	17	13.1875	17	7.6875	17	5.4375	17	20.9375	17	19.75
2017-12-14	23:00:00	11.75	5.1875	11.75	3.3125	11.75	5.875	11.75	15.6875	11.75	12.125
2017-12-14	23:30:00	16.9688	18.3125	16.9688	4.1875	16.9688	10.25	16.9688	9.1875	16.9688	18.4375
2017-12-15	00:00:00	9.40625	8.6875	9.40625	10.8125	9.40625	9.625	9.40625	19.3125	9.40625	13.9375
2017-12-15	00:30:00	16.5938	14.5625	16.5938	17	16.5938	15.1875	16.5938	17.8125	16.5938	12.5625
2017-12-15	01:00:00	15.0312	12.875	15.0312	15.0625	15.0312	15.75	15.0312	16.375	15.0312	15.1875
2017-12-15	01:30:00	15.6875	22.4375	15.6875	9.375	15.6875	12.75	15.6875	18.875	15.6875	19.0625
2017-12-15	02:00:00	19.5625	13.625	19.5625	7.25	19.5625	12.9375	19.5625	20.875	19.5625	17.0625
2017-12-15	02:30:00	15.2812	12	15.2812	7	15.2812	5.8125	15.2812	19.5	15.2812	20.375
2017-12-15	03:00:00	24.8438	18.375	24.8438	17.875	24.8438	17.5625	24.8438	21.875	24.8438	10.5
2017-12-15	03:30:00	27.5625	11.3125	27.5625	19.375	27.5625	21.0625	27.5625	21.1875	27.5625	27.6875
2017-12-15	04:00:00	26.7812	18.0625	26.7812	13.3125	26.7812	11.0625	26.7812	21.4375	26.7812	29.4375
2017-12-15	04:30:00	28.625	14.625	28.625	9.8125	28.625	13.8125	28.625	26	28.625	29.6875
2017-12-15	05:00:00	18.625	21.5625	18.625	16.5	18.625	16.0625	18.625	33.5625	18.625	26.8125
2017-12-15	05:30:00	25.25	23.9375	25.25	10.5	25.25	22.625	25.25	32.3125	25.25	23.625
2017-12-15	06:00:00	27.75	23.75	27.75	16.6875	27.75	19.0625	27.75	28.75	27.75	19.75
2017-12-15	06:30:00	20.1875	26.875	20.1875	17.125	20.1875	19.125	20.1875	29.5	20.1875	19.9375
2017-12-15	07:00:00	27.9688	21.0625	27.9688	17.25	27.9688	22.6875	27.9688	18.875	27.9688	16.875
2017-12-15	07:30:00	20.5	29.1875	20.5	21.0625	20.5	19.125	20.5	21.3125	20.5	10.125
2017-12-15	08:00:00	14.25	29.8125	14.25	26.9375	14.25	17.9375	14.25	9.4375	14.25	2.4375
2017-12-15	08:30:00	15.625	36.375	15.625	27.25	15.625	26	15.625	1.4375	15.625	4.5
2017-12-15	09:00:00	11.375	42.875	11.375	25.3125	11.375	34.5	11.375	1.8125	11.375	5.25
2017-12-15	09:30:00	3.90625	33.3125	3.90625	21.375	3.90625	26.125	3.90625	3.3125	3.90625	3.8125
2017-12-15	10:00:00	2.09375	27.5	2.09375	34.75	2.09375	23.5625	2.09375	8.375	2.09375	0.8125
2017-12-15	10:30:00	1.5625	19	1.5625	24.5	1.5625	25.6875	1.5625	2.6875	1.5625	3.8125
2017-12-15	11:00:00	0.53125	23.0625	0.53125	21.3125	0.53125	24.5	0.53125	5.875	0.53125	4.375
2017-12-15	11:30:00	1.6875	15.1875	1.6875	29.4375	1.6875	29.6875	1.6875	4.9375	1.6875	3.9375
2017-12-15	12:00:00	0.75	3.8125	0.75	24.8125	0.75	22.25	0.75	9	0.75	5.5625
2017-12-15	12:30:00	3.125	10.4375	3.125	14.4375	3.125	10.8125	3.125	6.25	3.125	2.4375
2017-12-15	13:00:00	5.84375	5.3125	5.84375	20.9375	5.84375	5.1875	5.84375	8.1875	5.84375	5
2017-12-15	13:30:00	1.34375	0.6875	1.34375	8.5625	1.34375	2.3125	1.34375	4.1875	1.34375	5.625
2017-12-15	14:00:00	4.90625	2.4375	4.90625	5.75	4.90625	5.875	4.90625	5.5625	4.90625	9.5
2017-12-15	14:30:00	15.9688	16.4375	15.9688	16.625	15.9688	24.3125	15.9688	15.9375	15.9688	15.6875
2017-12-15	15:00:00	6.71875	12.8125	6.71875	5.25	6.71875	3.125	6.71875	5.6875	6.71875	3.625
2017-12-15	15:30:00	2.40625	1	2.40625	3.6875	2.40625	5.5625	2.40625	3	2.40625	2.375
2017-12-15	16:00:00	1	0.75	1	10.0625	1	3	1	5.25	1	5.1875
2017-12-15	16:30:00	4.3125	8.5	4.3125	8.6875	4.3125	10.1875	4.3125	13.125	4.3125	7.4375
2017-12-15	17:00:00	5.65625	1.75	5.65625	3.375	5.65625	11.25	5.65625	7.3125	5.65625	6.125
2017-12-15	17:30:00	3.0625	2.25	3.0625	1.9375	3.0625	9.4375	3.0625	9.3125	3.0625	11.5625
2017-12-15	18:00:00	6.21875	5.625	6.21875	6.75	6.21875	3.5	6.21875	10.75	6.21875	14.4375
2017-12-15	18:30:00	4.875	2.5625	4.875	4.0625	4.875	1.6875	4.875	12.5625	4.875	19.6875
2017-12-15	19:00:00	7.53125	7.75	7.53125	4.625	7.53125	6.8125	7.53125	13.625	7.53125	12.9375
2017-12-15	19:30:00	11.0625	4.875	11.0625	0.4375	11.0625	4.9375	11.0625	15.25	11.0625	8.6875
2017-12-15	20:00:00	14.0938	6	14.0938	5.5625	14.0938	3.1875	14.0938	14.375	14.0938	9.75
2017-12-15	20:30:00	15	11.0625	15	1.375	15	0.5	15	10.8125	15	11.5625
2017-12-15	21:00:00	13.3125	5.5625	13.3125	3.5	13.3125	9.75	13.3125	12.3125	13.3125	14.1875
2017-12-15	21:30:00	13.625	4.5625	13.625	2.625	13.625	6	13.625	10.4375	13.625	11.9375
2017-12-15	22:00:00	13.1875	13.0625	13.1875	1.5	13.1875	4.9375	13.1875	9.8125	13.1875	4.8125
2017-12-15	22:30:00	13.125	11.3125	13.125	2.5	13.125	10.375	13.125	9.9375	13.125	11.3125
2017-12-15	23:00:00	16.375	9.8125	16.375	11.6875	16.375	5.6875	16.375	9.9375	16.375	21.6875
2017-12-15	23:30:00	21.1562	17.5	21.1562	9.3125	21.1562	9.0625	21.1562	18.9375	21.1562	17.9375
2017-12-16	00:00:00	14.4062	14.125	14.4062	6.3125	14.4062	18.6875	14.4062	15.875	14.4062	20.1875
2017-12-16	00:30:00	14.4375	22.375	14.4375	10.1875	14.4375	10.6875	14.4375	19.125	14.4375	22.0625
2017-12-16	01:00:00	19.125	9.9375	19.125	12.4375	19.125	6.75	19.125	15.4375	19.125	18.9375
2017-12-16	01:30:00	11.7812	20.9375	11.7812	9.75	11.7812	5.625	11.7812	17.9375	11.7812	21.5625
2017-12-16	02:00:00	23.25	11.4375	23.25	18.0625	23.25	23.25	23.25	15.0625	23.25	23.625
2017-12-16	02:30:00	23.6562	11.8125	23.6562	18.75	23.6562	15.5625	23.6562	22.9375	23.6562	23.1875
2017-12-16	03:00:00	20.8438	18.875	20.8438	7.375	20.8438	18.75	20.8438	20.75	20.8438	23.125
2017-12-16	03:30:00	23.7812	16.625	23.7812	14.0625	23.7812	11.0625	23.7812	24.5625	23.7812	24
2017-12-16	04:00:00	20.75	18.25	20.75	15.375	20.75	15.5	20.75	21.0625	20.75	23.5625
2017-12-16	04:30:00	18.6562	25.4375	18.6562	4.625	18.6562	11.75	18.6562	22.6875	18.6562	30.125
2017-12-16	05:00:00	23.9688	22.625	23.9688	14.125	23.9688	13	23.9688	22.1875	23.9688	20.0625
2017-12-16	05:30:00	26.625	23.8125	26.625	22.875	26.625	25.625	26.625	22.0625	26.625	19.8125
2017-12-16	06:00:00	24.5	34.0625	24.5	14.375	24.5	17.5625	24.5	21.4375	24.5	18.4375
2017-12-16	06:30:00	18.5312	27.8125	18.5312	16	18.5312	18.6875	18.5312	8.9375	18.5312	9.1875
2017-12-16	07:00:00	13.9375	30.6875	13.9375	19.25	13.9375	25.0625	13.9375	7.25	13.9375	10.5625
2017-12-16	07:30:00	14.875	33.0625	14.875	20.9375	14.875	23.4375	14.875	5.375	14.875	9.5625
2017-12-16	08:00:00	6.78125	24.8125	6.78125	19.9375	6.78125	21.75	6.78125	2.1875	6.78125	0.75
2017-12-16	08:30:00	3.21875	32.3125	3.21875	24.6875	3.21875	29.6875	3.21875	5.375	3.21875	7.1875
2017-12-16	09:00:00	3.125	32	3.125	25.125	3.125	26.8125	3.125	4	3.125	3.8125
2017-12-16	09:30:00	2.9375	29.6875	2.9375	23.8125	2.9375	23.1875	2.9375	6.4375	2.9375	3.1875
2017-12-16	10:00:00	6.65625	25.375	6.65625	14.3125	6.65625	24.875	6.65625	9	6.65625	4.625
2017-12-16	10:30:00	4.3125	15.5625	4.3125	16.1875	4.3125	21.125	4.3125	5.875	4.3125	2.625
2017-12-16	11:00:00	2.15625	8.1875	2.15625	17.75	2.15625	19	2.15625	4.8125	2.15625	1.0625
2017-12-16	11:30:00	1.75	11.875	1.75	11.6875	1.75	15.625	1.75	7.8125	1.75	2.125
2017-12-16	12:00:00	5.59375	7.375	5.59375	17.9375	5.59375	9.6875	5.59375	12.125	5.59375	3.3125
2017-12-16	12:30:00	9.96875	3.25	9.96875	8.625	9.96875	7.125	9.96875	4	9.96875	5.9375
2017-12-16	13:00:00	4.46875	7.6875	4.46875	6.25	4.46875	7.9375	4.46875	7.875	4.46875	8.75
2017-12-16	13:30:00	3.46875	6.4375	3.46875	1.1875	3.46875	5.3125	3.46875	3.8125	3.46875	3.375
2017-12-16	14:00:00	0.75	3.6875	0.75	2.1875	0.75	8.25	0.75	2.25	0.75	3.9375
2017-12-16	14:30:00	7.15625	10.8125	7.15625	20.625	7.15625	20.75	7.15625	13.8125	7.15625	15.75
2017-12-16	15:00:00	4.3125	2.1875	4.3125	5.75	4.3125	5.9375	4.3125	8.375	4.3125	5.6875
2017-12-16	15:30:00	6.03125	0.0625	6.03125	3.6875	6.03125	10.125	6.03125	4.3125	6.03125	5.375
2017-12-16	16:00:00	9.21875	1.3125	9.21875	2.3125	9.21875	5.375	9.21875	4.9375	9.21875	11.375
2017-12-16	16:30:00	3.46875	4.6875	3.46875	0	3.46875	1.25	3.46875	7.5625	3.46875	9.375
2017-12-16	17:00:00	6.03125	11.1875	6.03125	2.125	6.03125	5.125	6.03125	7.5625	6.03125	11.625
2017-12-16	17:30:00	10.4375	2.0625	10.4375	1.375	10.4375	6.8125	10.4375	8.0625	10.4375	15.5625
2017-12-16	18:00:00	7.21875	10.125	7.21875	4.0625	7.21875	5.25	7.21875	10.875	7.21875	11.125
2017-12-16	18:30:00	7.4375	3	7.4375	0.4375	7.4375	6.8125	7.4375	10	7.4375	8.125
2017-12-16	19:00:00	17.5312	2.8125	17.5312	4.8125	17.5312	1.5625	17.5312	9.6875	17.5312	13.875
2017-12-16	19:30:00	10.7812	6.375	10.7812	2.4375	10.7812	1.6875	10.7812	15.875	10.7812	5.5625
2017-12-16	20:00:00	14.1562	8	14.1562	1.9375	14.1562	3	14.1562	9.5625	14.1562	7.875
2017-12-16	20:30:00	9.78125	10.1875	9.78125	7.25	9.78125	7.125	9.78125	8.6875	9.78125	18.75
2017-12-16	21:00:00	11.5938	2.3125	11.5938	3.6875	11.5938	9.4375	11.5938	8.0625	11.5938	1.4375
2017-12-16	21:30:00	12.3125	22.1875	12.3125	2.8125	12.3125	7.3125	12.3125	10.3125	12.3125	10.4375
2017-12-16	22:00:00	10.5625	7.3125	10.5625	4.25	10.5625	14.625	10.5625	11.5	10.5625	17
2017-12-16	22:30:00	16.9688	19.125	16.9688	5.9375	16.9688	11.9375	16.9688	16.125	16.9688	5.625
2017-12-16	23:00:00	14.3438	11.375	14.3438	14.0625	14.3438	7.9375	14.3438	15.9375	14.3438	19.125
2017-12-16	23:30:00	12.5625	13.0625	12.5625	15.375	12.5625	17.3125	12.5625	12.8125	12.5625	23.9375
2017-12-17	00:00:00	10.8125	12.75	10.8125	8.5	10.8125	9.75	10.8125	20.375	10.8125	23.9375
2017-12-17	00:30:00	17.0312	16.125	17.0312	9.875	17.0312	10.1875	17.0312	18.875	17.0312	8
2017-12-17	01:00:00	17.7812	23.625	17.7812	11.5	17.7812	8.625	17.7812	20.5625	17.7812	12.25
2017-12-17	01:30:00	17.75	11.0625	17.75	11.3125	17.75	15.125	17.75	27	17.75	21.375
2017-12-17	02:00:00	26.25	16.5	26.25	13.375	26.25	16.75	26.25	18.625	26.25	23.6875
2017-12-17	02:30:00	13.5938	8.4375	13.5938	11.9375	13.5938	8.625	13.5938	19.25	13.5938	25.125
2017-12-17	03:00:00	20.7812	16.25	20.7812	13.4375	20.7812	7.5625	20.7812	22.4375	20.7812	21.9375
2017-12-17	03:30:00	23.7812	21.125	23.7812	14.6875	23.7812	18.5	23.7812	17.375	23.7812	20.875
2017-12-17	04:00:00	22.1562	19.3125	22.1562	14.4375	22.1562	11.75	22.1562	18.0625	22.1562	20.75
2017-12-17	04:30:00	21.1562	19.6875	21.1562	13	21.1562	13.625	21.1562	14.375	21.1562	16.8125
2017-12-17	05:00:00	20.4062	29.1875	20.4062	15.875	20.4062	15.3125	20.4062	16.5	20.4062	16.375
2017-12-17	05:30:00	16.4688	32.9375	16.4688	15.625	16.4688	24.8125	16.4688	11	16.4688	8.75
2017-12-17	06:00:00	22.9375	21.6875	22.9375	19.0625	22.9375	20.3125	22.9375	12.3125	22.9375	9.75
2017-12-17	06:30:00	12.5312	28.4375	12.5312	9.8125	12.5312	21.8125	12.5312	10.1875	12.5312	4.75
2017-12-17	07:00:00	10.1562	21.4375	10.1562	23.3125	10.1562	33.375	10.1562	11.6875	10.1562	2.25
2017-12-17	07:30:00	10.4688	24.9375	10.4688	24.375	10.4688	26.0625	10.4688	7.9375	10.4688	5.5
2017-12-17	08:00:00	6.34375	19.25	6.34375	23.375	6.34375	22.6875	6.34375	13.625	6.34375	7.25
2017-12-17	08:30:00	4.3125	19.4375	4.3125	20.4375	4.3125	25.9375	4.3125	11.3125	4.3125	2.1875
2017-12-17	09:00:00	3.21875	12	3.21875	16.625	3.21875	16.1875	3.21875	7.3125	3.21875	1.75
2017-12-17	09:30:00	5.0625	6.4375	5.0625	19.5625	5.0625	15.9375	5.0625	5.5625	5.0625	10.75
2017-12-17	10:00:00	1.71875	12.875	1.71875	17.875	1.71875	15.625	1.71875	4.0625	1.71875	8.375
2017-12-17	10:30:00	3.4375	9.5625	3.4375	17.5625	3.4375	12.5	3.4375	6.8125	3.4375	5.0625
2017-12-17	11:00:00	7.9375	7.9375	7.9375	10.125	7.9375	11.5625	7.9375	2.8125	7.9375	6.75
2017-12-17	11:30:00	5.78125	8.4375	5.78125	10.875	5.78125	7.875	5.78125	3.0625	5.78125	2.125
2017-12-17	12:00:00	3.1875	4.5625	3.1875	5.6875	3.1875	5.1875	3.1875	4.625	3.1875	3.5625
2017-12-17	12:30:00	2.25	1.3125	2.25	8.625	2.25	4.625	2.25	2.0625	2.25	3.125
2017-12-17	13:00:00	3.3125	2	3.3125	7.25	3.3125	6.4375	3.3125	3.1875	3.3125	8.9375
2017-12-17	13:30:00	2.1875	12	2.1875	5.9375	2.1875	5.9375	2.1875	2.125	2.1875	5.6875
2017-12-17	14:00:00	1.15625	7	1.15625	4.5	1.15625	7.5625	1.15625	4.875	1.15625	3.625
2017-12-17	14:30:00	15.125	14.3125	15.125	11.0625	15.125	20.9375	15.125	20.1875	15.125	9.1875
2017-12-17	15:00:00	6.65625	10.1875	6.65625	6.3125	6.65625	9.25	6.65625	2.625	6.65625	15.125
2017-12-17	15:30:00	3.9375	1.8125	3.9375	3.125	3.9375	2.375	3.9375	15.625	3.9375	6.4375
2017-12-17	16:00:00	3.15625	0.75	3.15625	0.0625	3.15625	8.625	3.15625	9.4375	3.15625	13.625
2017-12-17	16:30:00	3.34375	5.5	3.34375	3.75	3.34375	0.25	3.34375	5.0625	3.34375	13
2017-12-17	17:00:00	10.4375	3.5	10.4375	9.25	10.4375	4.625	10.4375	13.9375	10.4375	5.875
2017-12-17	17:30:00	11.625	7.5625	11.625	0.875	11.625	2.1875	11.625	9.0625	11.625	9.5625
2017-12-17	18:00:00	9.03125	7	9.03125	0.125	9.03125	6.5625	9.03125	12.0625	9.03125	9.25
2017-12-17	18:30:00	9.34375	7	9.34375	2.75	9.34375	2.3125	9.34375	9.125	9.34375	8.375
2017-12-17	19:00:00	13.9062	10.0625	13.9062	5.1875	13.9062	4.375	13.9062	7.875	13.9062	15.6875
2017-12-17	19:30:00	14.375	6.375	14.375	6.6875	14.375	5.9375	14.375	5.9375	14.375	7.625
2017-12-17	20:00:00	13.1875	7.9375	13.1875	3.6875	13.1875	5.8125	13.1875	12.1875	13.1875	4.625
2017-12-17	20:30:00	14.125	10.5625	14.125	5.125	14.125	7.375	14.125	13.8125	14.125	17.125
2017-12-17	21:00:00	15.7188	18.375	15.7188	8.375	15.7188	10	15.7188	17.375	15.7188	18.1875
2017-12-17	21:30:00	18.1562	8.875	18.1562	10.625	18.1562	10.3125	18.1562	14.0625	18.1562	13.375
2017-12-17	22:00:00	7.0625	14.75	7.0625	13.5	7.0625	7.5	7.0625	14.625	7.0625	19.3125
2017-12-17	22:30:00	12.6875	15.125	12.6875	10.4375	12.6875	13.75	12.6875	15.625	12.6875	17.875
2017-12-17	23:00:00	14.25	17.5	14.25	6.3125	14.25	10.5625	14.25	15.9375	14.25	20.8125
2017-12-17	23:30:00	22.8125	8.6875	22.8125	10.0625	22.8125	13.4375	22.8125	11.125	22.8125	24.125
2017-12-18	00:00:00	21.3438	22.375	21.3438	6.4375	21.3438	10.4375	21.3438	20.6875	21.3438	17.3125
2017-12-18	00:30:00	18.9375	18.75	18.9375	3.0625	18.9375	8.875	18.9375	16.9375	18.9375	17.625
2017-12-18	01:00:00	17.5	14.3125	17.5	2.9375	17.5	10.4375	17.5	20.375	17.5	16.75
2017-12-18	01:30:00	21.0312	14.75	21.0312	9.8125	21.0312	10.625	21.0312	25.1875	21.0312	27.75
2017-12-18	02:00:00	23.875	19.5625	23.875	16.6875	23.875	12.75	23.875	19	23.875	26.3125
2017-12-18	02:30:00	12.125	27.75	12.125	10.3125	12.125	11.4375	12.125	21.6875	12.125	20.1875
2017-12-18	03:00:00	16.5938	16.875	16.5938	9.5	16.5938	16.3125	16.5938	16.5625	16.5938	9.4375
2017-12-18	03:30:00	21.0938	22.75	21.0938	17.875	21.0938	15.875	21.0938	11.875	21.0938	12.3125
2017-12-18	04:00:00	21.9062	26.25	21.9062	12.25	21.9062	12.625	21.9062	10.375	21.9062	15.875
2017-12-18	04:30:00	18	27.6875	18	11.75	18	23.5625	18	12.875	18	6.8125
2017-12-18	05:00:00	19.3438	30.4375	19.3438	22.5	19.3438	13	19.3438	7.9375	19.3438	7.25
2017-12-18	05:30:00	11.9688	22.1875	11.9688	21.25	11.9688	17.625	11.9688	5.4375	11.9688	13.4375
2017-12-18	06:00:00	11.4062	25	11.4062	23	11.4062	21.6875	11.4062	14.875	11.4062	4.375
2017-12-18	06:30:00	10.875	23.5	10.875	21.625	10.875	14.8125	10.875	6.5625	10.875	4.8125
2017-12-18	07:00:00	4.125	18.0625	4.125	23.8125	4.125	19.375	4.125	9.6875	4.125	2.5
2017-12-18	07:30:00	7.34375	20.0625	7.34375	20.375	7.34375	24.875	7.34375	7.5	7.34375	6.9375
2017-12-18	08:00:00	8.0625	19.5625	8.0625	21	8.0625	20.375	8.0625	4.5	8.0625	15.5
2017-12-18	08:30:00	6.78125	21.6875	6.78125	17.8125	6.78125	13.375	6.78125	6.125	6.78125	4.1875
2017-12-18	09:00:00	2.8125	4.9375	2.8125	15.3125	2.8125	8.875	2.8125	12.25	2.8125	5.125
2017-12-18	09:30:00	5.53125	8.5	5.53125	9.9375	5.53125	8.5625	5.53125	3.8125	5.53125	3.125
2017-12-18	10:00:00	5.03125	5.875	5.03125	9.9375	5.03125	10	5.03125	3	5.03125	4.625
2017-12-18	10:30:00	7.15625	7.25	7.15625	5.6875	7.15625	9	7.15625	8.1875	7.15625	10.75
2017-12-18	11:00:00	4.03125	10.9375	4.03125	6.625	4.03125	11.1875	4.03125	6.6875	4.03125	2.25
2017-12-18	11:30:00	2.15625	8.4375	2.15625	4.125	2.15625	4.375	2.15625	9.3125	2.15625	2.375
2017-12-18	12:00:00	6.28125	7.5	6.28125	8	6.28125	4.875	6.28125	3.1875	6.28125	4.1875
2017-12-18	12:30:00	3.40625	2	3.40625	4.4375	3.40625	5	3.40625	5.625	3.40625	3.5625
2017-12-18	13:00:00	3.78125	5.5625	3.78125	7.5625	3.78125	4.875	3.78125	4.9375	3.78125	6.5
2017-12-18	13:30:00	1.46875	4.4375	1.46875	0.5625	1.46875	2.5	1.46875	4.625	1.46875	6.9375
2017-12-18	14:00:00	5.4375	4.125	5.4375	1.5625	5.4375	3.875	5.4375	12.6875	5.4375	9.3125
2017-12-18	14:30:00	19.25	6.1875	19.25	11.375	19.25	19.625	19.25	19.0625	19.25	21.875
2017-12-18	15:00:00	5.125	9.9375	5.125	5.875	5.125	7.25	5.125	7	5.125	4.5
2017-12-18	15:30:00	3.59375	5.5625	3.59375	4.75	3.59375	2.0625	3.59375	5.625	3.59375	5.125
2017-12-18	16:00:00	3.15625	1.125	3.15625	2.0625	3.15625	1.6875	3.15625	8.625	3.15625	16.1875
2017-12-18	16:30:00	7.375	8.0625	7.375	1.8125	7.375	0.5	7.375	14.625	7.375	8.375
2017-12-18	17:00:00	14.7188	5.75	14.7188	4.9375	14.7188	2.875	14.7188	9.375	14.7188	11
2017-12-18	17:30:00	8.125	5	8.125	1.75	8.125	2.5625	8.125	9.9375	8.125	10.0625
2017-12-18	18:00:00	8.6875	10.5625	8.6875	4	8.6875	8.1875	8.6875	17.0625	8.6875	10.5625
2017-12-18	18:30:00	8.9375	12.5625	8.9375	3.125	8.9375	8.75	8.9375	9.3125	8.9375	9.75
2017-12-18	19:00:00	15.3438	4.5625	15.3438	8	15.3438	5.625	15.3438	1.625	15.3438	9.4375
2017-12-18	19:30:00	11.5312	10.9375	11.5312	3.125	11.5312	6.6875	11.5312	19.25	11.5312	9.75
2017-12-18	20:00:00	8.75	7.4375	8.75	2.125	8.75	7.1875	8.75	14.75	8.75	7.625
2017-12-18	20:30:00	14.875	10.3125	14.875	5.5625	14.875	8.875	14.875	11.6875	14.875	15.875
2017-12-18	21:00:00	15.9688	8.8125	15.9688	4.3125	15.9688	6.375	15.9688	13.125	15.9688	7.0625
2017-12-18	21:30:00	18.875	11.5625	18.875	5.6875	18.875	11.625	18.875	12.9375	18.875	20.875
2017-12-18	22:00:00	14.4375	12.6875	14.4375	10.5625	14.4375	4.75	14.4375	11.1875	14.4375	17.0625
2017-12-18	22:30:00	15.4375	17.1875	15.4375	9.5625	15.4375	13.3125	15.4375	8.875	15.4375	17.4375
2017-12-18	23:00:00	12.1875	8.9375	12.1875	7.8125	12.1875	9.8125	12.1875	23.3125	12.1875	20.375
2017-12-18	23:30:00	16.2188	15.5	16.2188	9.75	16.2188	16.1875	16.2188	17.1875	16.2188	19.25

## Sheet: TD2 2
Graphs show behavior in DD
LD: 3-Mar-18 to 9-Mar-18
DD: 10-Mar-18 to 15-Mar-18
TD2/+
	Time	No Light Pulse	ZT13 Pulse	No Light Pulse	ZT15 Pulse	No Light Pulse	ZT17 Pulse	No Light Pulse	ZT19 Pulse	No Light Pulse	ZT21 Pulse	No Light Pulse	ZT23 Pulse
2018-03-03	00:00:00	65.5	45.0625	65.5	66.5	65.5	55.625	65.5	64.4375	65.5	60.5	65.5	69.0625
2018-03-03	00:30:00	53.8125	37.875	53.8125	59.875	53.8125	49.6875	53.8125	50.5	53.8125	46.625	53.8125	55.375
2018-03-03	01:00:00	51.9375	27.125	51.9375	56.1875	51.9375	43	51.9375	42.125	51.9375	46.75	51.9375	45.5
2018-03-03	01:30:00	33.125	23.0625	33.125	54.3125	33.125	40.5625	33.125	37.375	33.125	32.125	33.125	31.6875
2018-03-03	02:00:00	27.625	19.5	27.625	50.25	27.625	36.625	27.625	33.375	27.625	25.1875	27.625	15.25
2018-03-03	02:30:00	20.75	22.4375	20.75	27.4375	20.75	28.8125	20.75	29.5625	20.75	18.8125	20.75	14.75
2018-03-03	03:00:00	19	21.9375	19	35.3125	19	22.125	19	25.3125	19	20.5625	19	14.125
2018-03-03	03:30:00	12.5	14	12.5	38.1875	12.5	20.6875	12.5	26.1875	12.5	22.1875	12.5	13.1875
2018-03-03	04:00:00	17.25	15.9375	17.25	35.9375	17.25	21.25	17.25	28.125	17.25	23.5625	17.25	11.5625
2018-03-03	04:30:00	16.4375	15	16.4375	34.875	16.4375	25.3125	16.4375	27.6875	16.4375	16.5625	16.4375	21.9375
2018-03-03	05:00:00	8.3125	13.125	8.3125	28.5	8.3125	22.0625	8.3125	29.8125	8.3125	17.0625	8.3125	27.9375
2018-03-03	05:30:00	13.9375	11.0625	13.9375	29.1875	13.9375	24.0625	13.9375	22.8125	13.9375	17.3125	13.9375	16.75
2018-03-03	06:00:00	19	14.8125	19	30.375	19	23.25	19	28.1875	19	20.875	19	18.1875
2018-03-03	06:30:00	8.9375	15.75	8.9375	30.375	8.9375	26.1875	8.9375	25.6875	8.9375	17.875	8.9375	14.875
2018-03-03	07:00:00	28.75	11.375	28.75	34.875	28.75	26.1875	28.75	20	28.75	17.625	28.75	21.4375
2018-03-03	07:30:00	26.1875	13.75	26.1875	34.375	26.1875	23.0625	26.1875	21.375	26.1875	16.6875	26.1875	15.8125
2018-03-03	08:00:00	25.625	28.6875	25.625	35.875	25.625	19.375	25.625	19.5625	25.625	14.25	25.625	17.25
2018-03-03	08:30:00	67.375	47.75	67.375	72.125	67.375	73.625	67.375	65.1875	67.375	78.4375	67.375	75.6875
2018-03-03	09:00:00	23.1875	22.9375	23.1875	42.4375	23.1875	30.125	23.1875	24.9375	23.1875	40.0625	23.1875	13.875
2018-03-03	09:30:00	2.4375	11.3125	2.4375	19.875	2.4375	13.4375	2.4375	6.625	2.4375	12.125	2.4375	4.5
2018-03-03	10:00:00	0.375	11.5	0.375	17.5625	0.375	5.375	0.375	6.125	0.375	4.3125	0.375	4.4375
2018-03-03	10:30:00	1.6875	6.9375	1.6875	7.1875	1.6875	1.0625	1.6875	5.25	1.6875	3.0625	1.6875	1.0625
2018-03-03	11:00:00	1.1875	8.4375	1.1875	13.8125	1.1875	7	1.1875	6.3125	1.1875	4.1875	1.1875	3.375
2018-03-03	11:30:00	2.9375	3.5625	2.9375	29.875	2.9375	5.6875	2.9375	10.0625	2.9375	5.8125	2.9375	13.0625
2018-03-03	12:00:00	7.125	3.8125	7.125	14.375	7.125	21.3125	7.125	3.125	7.125	9.9375	7.125	9.5625
2018-03-03	12:30:00	6	10.5	6	18.4375	6	13.9375	6	8.5	6	17.6875	6	16.1875
2018-03-03	13:00:00	10	11	10	16.625	10	17.9375	10	6.6875	10	18.1875	10	7.5625
2018-03-03	13:30:00	13.8125	10.5	13.8125	24.25	13.8125	11.625	13.8125	5.625	13.8125	10.8125	13.8125	17.625
2018-03-03	14:00:00	15.9375	16.1875	15.9375	28.375	15.9375	16.75	15.9375	10.1875	15.9375	27.1875	15.9375	15.5
2018-03-03	14:30:00	16.375	16.5625	16.375	41.8125	16.375	12.875	16.375	20.3125	16.375	41.875	16.375	17.5625
2018-03-03	15:00:00	17.1875	23.9375	17.1875	32.125	17.1875	19.6875	17.1875	21.125	17.1875	35.5625	17.1875	10.8125
2018-03-03	15:30:00	28.5	40.6875	28.5	12.75	28.5	20.6875	28.5	29.5625	28.5	11.5625	28.5	12.3125
2018-03-03	16:00:00	27.125	15.875	27.125	18	27.125	24.125	27.125	26.125	27.125	8.6875	27.125	25.75
2018-03-03	16:30:00	27.9375	18.3125	27.9375	34.625	27.9375	32.375	27.9375	14.0625	27.9375	25.875	27.9375	34.5
2018-03-03	17:00:00	30.9375	22.25	30.9375	47.9375	30.9375	34.5625	30.9375	14.5	30.9375	21.3125	30.9375	37.0625
2018-03-03	17:30:00	14.25	14.6875	14.25	29.8125	14.25	28.6875	14.25	29.4375	14.25	17.4375	14.25	32.1875
2018-03-03	18:00:00	22.5	19.75	22.5	22.0625	22.5	28.6875	22.5	31.5625	22.5	17.625	22.5	16.5
2018-03-03	18:30:00	18.125	32.3125	18.125	37.6875	18.125	22.5	18.125	30.1875	18.125	22.625	18.125	23.625
2018-03-03	19:00:00	31.1875	18.75	31.1875	39.3125	31.1875	38.75	31.1875	33.125	31.1875	28.5625	31.1875	24.5
2018-03-03	19:30:00	31.1875	15.125	31.1875	25.3125	31.1875	12.625	31.1875	21.6875	31.1875	45.75	31.1875	29.875
2018-03-03	20:00:00	18.5	26.0625	18.5	33.9375	18.5	29.1875	18.5	24.5	18.5	36.9375	18.5	25.125
2018-03-03	20:30:00	77.6875	65.1875	77.6875	85	77.6875	60.875	77.6875	67.25	77.6875	56.1875	77.6875	64.625
2018-03-03	21:00:00	49.6875	35.3125	49.6875	49.8125	49.6875	35.6875	49.6875	49.8125	49.6875	34.75	49.6875	44.75
2018-03-03	21:30:00	32.25	31.625	32.25	43.4375	32.25	36.1875	32.25	36.875	32.25	32.125	32.25	25.75
2018-03-03	22:00:00	26.4375	23.25	26.4375	38.625	26.4375	33.75	26.4375	33.125	26.4375	25.4375	26.4375	22.75
2018-03-03	22:30:00	21.625	24.125	21.625	31.5625	21.625	25.0625	21.625	32.4375	21.625	24.25	21.625	21.4375
2018-03-03	23:00:00	18.625	19.8125	18.625	18.125	18.625	22.3125	18.625	24.125	18.625	17.5	18.625	15.875
2018-03-03	23:30:00	19.5	15.625	19.5	14.25	19.5	25.3125	19.5	15.25	19.5	12.1875	19.5	9.6875
2018-03-04	00:00:00	14.5	14.6875	14.5	19.125	14.5	14.25	14.5	18.0625	14.5	14.625	14.5	9.125
2018-03-04	00:30:00	8.625	13.875	8.625	27.125	8.625	19.3125	8.625	10.8125	8.625	18	8.625	5.25
2018-03-04	01:00:00	8.5625	14.125	8.5625	23.375	8.5625	8.875	8.5625	15.3125	8.5625	8.4375	8.5625	10.4375
2018-03-04	01:30:00	11.25	13.8125	11.25	15.25	11.25	24.4375	11.25	17.875	11.25	8.5625	11.25	23.9375
2018-03-04	02:00:00	10.5	16.4375	10.5	18.9375	10.5	10.4375	10.5	10.5	10.5	12.75	10.5	10.75
2018-03-04	02:30:00	19.125	10.75	19.125	11.75	19.125	16.125	19.125	20.875	19.125	12.5625	19.125	2.875
2018-03-04	03:00:00	27.3125	16.5625	27.3125	16.5	27.3125	15.6875	27.3125	19.1875	27.3125	23.5625	27.3125	16.125
2018-03-04	03:30:00	41.4375	21.6875	41.4375	25.6875	41.4375	20.8125	41.4375	24.75	41.4375	37.625	41.4375	17.625
2018-03-04	04:00:00	39.625	33	39.625	34.375	39.625	43.5625	39.625	39.125	39.625	39.625	39.625	11.625
2018-03-04	04:30:00	47.5	44.6875	47.5	39.9375	47.5	35.75	47.5	46.375	47.5	40.8125	47.5	35.4375
2018-03-04	05:00:00	55.625	56	55.625	51.0625	55.625	51.75	55.625	52.125	55.625	56.875	55.625	45.9375
2018-03-04	05:30:00	70.1875	58	70.1875	58	70.1875	55.125	70.1875	62.375	70.1875	70.75	70.1875	55.125
2018-03-04	06:00:00	70	64.25	70	70	70	63.875	70	68.1875	70	67	70	61.875
2018-03-04	06:30:00	74.9375	67.875	74.9375	69.6875	74.9375	79.375	74.9375	87.375	74.9375	69.3125	74.9375	73.3125
2018-03-04	07:00:00	84.0625	74.9375	84.0625	72.125	84.0625	79.6875	84.0625	75.3125	84.0625	79.875	84.0625	70.25
2018-03-04	07:30:00	88.25	79	88.25	74.875	88.25	92.1875	88.25	81.0625	88.25	77.4375	88.25	71.5625
2018-03-04	08:00:00	85.875	79.125	85.875	70.625	85.875	89.375	85.875	89.3125	85.875	82.6875	85.875	74.5625
2018-03-04	08:30:00	98.375	103.5	98.375	115	98.375	121.5	98.375	105.875	98.375	127.812	98.375	107.438
2018-03-04	09:00:00	15.6875	21.875	15.6875	34.625	15.6875	17.5	15.6875	22	15.6875	22.1875	15.6875	25.625
2018-03-04	09:30:00	4.0625	4.5	4.0625	10.25	4.0625	10	4.0625	9.6875	4.0625	6.1875	4.0625	14.75
2018-03-04	10:00:00	1	6.9375	1	14.875	1	10.0625	1	10.875	1	3.4375	1	8.5625
2018-03-04	10:30:00	5.0625	4.3125	5.0625	2.6875	5.0625	8.6875	5.0625	15.375	5.0625	3.5	5.0625	9.875
2018-03-04	11:00:00	4.9375	0.875	4.9375	6.3125	4.9375	6.5625	4.9375	5.125	4.9375	7.0625	4.9375	11.5625
2018-03-04	11:30:00	3.8125	0.25	3.8125	9	3.8125	9.3125	3.8125	12.75	3.8125	0.125	3.8125	5.1875
2018-03-04	12:00:00	3.375	1.0625	3.375	16.9375	3.375	6.6875	3.375	7.6875	3.375	0.5625	3.375	10.625
2018-03-04	12:30:00	5.875	0.9375	5.875	11.3125	5.875	12.6875	5.875	14.5	5.875	1.4375	5.875	9.125
2018-03-04	13:00:00	2.5625	4.625	2.5625	14.9375	2.5625	8.5625	2.5625	18.75	2.5625	2.875	2.5625	9.625
2018-03-04	13:30:00	5.3125	2.3125	5.3125	18.1875	5.3125	5.875	5.3125	2.5	5.3125	12.625	5.3125	6.3125
2018-03-04	14:00:00	3.5	8.625	3.5	17.6875	3.5	21.0625	3.5	13.125	3.5	8.9375	3.5	13.5
2018-03-04	14:30:00	14.8125	15.25	14.8125	22.0625	14.8125	15.75	14.8125	13.9375	14.8125	4.6875	14.8125	7.8125
2018-03-04	15:00:00	4.9375	10.0625	4.9375	7.25	4.9375	19.125	4.9375	8.75	4.9375	3.125	4.9375	10.3125
2018-03-04	15:30:00	8.5	12.25	8.5	15	8.5	32.875	8.5	6.75	8.5	4.375	8.5	12
2018-03-04	16:00:00	10.375	16.3125	10.375	24	10.375	13.5	10.375	11.6875	10.375	7.5	10.375	5.5625
2018-03-04	16:30:00	19	14	19	26.0625	19	5.0625	19	18.8125	19	23	19	22.6875
2018-03-04	17:00:00	19.4375	10.0625	19.4375	25.5	19.4375	12.5625	19.4375	32.3125	19.4375	29.375	19.4375	26.375
2018-03-04	17:30:00	27.5	20.8125	27.5	36.9375	27.5	19.3125	27.5	40.625	27.5	32.375	27.5	41.1875
2018-03-04	18:00:00	27.125	36.5	27.125	41.6875	27.125	24.6875	27.125	35.3125	27.125	32.375	27.125	24.75
2018-03-04	18:30:00	29.75	31.125	29.75	43.625	29.75	32.3125	29.75	30	29.75	27.1875	29.75	20.9375
2018-03-04	19:00:00	35.8125	35	35.8125	43.5	35.8125	34.5625	35.8125	25.4375	35.8125	31.5	35.8125	25.6875
2018-03-04	19:30:00	28	40.4375	28	41.6875	28	40.25	28	31.875	28	32.625	28	24.0625
2018-03-04	20:00:00	44.75	38.9375	44.75	40.25	44.75	34.5	44.75	36.375	44.75	26.5625	44.75	31.125
2018-03-04	20:30:00	84.125	76.25	84.125	99.6875	84.125	88.25	84.125	87.75	84.125	82.6875	84.125	86.25
2018-03-04	21:00:00	58.375	52	58.375	53.5625	58.375	47.5625	58.375	45.8125	58.375	42	58.375	51.125
2018-03-04	21:30:00	29.8125	29.9375	29.8125	36.5625	29.8125	37.4375	29.8125	43.375	29.8125	16.3125	29.8125	32.5625
2018-03-04	22:00:00	27.875	23.9375	27.875	24.3125	27.875	28.5	27.875	34.5625	27.875	19.3125	27.875	17.625
2018-03-04	22:30:00	20.75	19.1875	20.75	18	20.75	20.8125	20.75	18.8125	20.75	16.625	20.75	14.3125
2018-03-04	23:00:00	12.375	20.375	12.375	11.9375	12.375	24.125	12.375	16.75	12.375	10.8125	12.375	8.6875
2018-03-04	23:30:00	10.5625	16.4375	10.5625	12.3125	10.5625	8.0625	10.5625	12.25	10.5625	10.0625	10.5625	14.375
2018-03-05	00:00:00	8	10.375	8	10.9375	8	11.625	8	12.875	8	10.625	8	4.75
2018-03-05	00:30:00	4.875	8.375	4.875	15.1875	4.875	14.5625	4.875	7.3125	4.875	5.0625	4.875	4.625
2018-03-05	01:00:00	9.875	8.9375	9.875	9.9375	9.875	9.125	9.875	2.1875	9.875	2.625	9.875	4.5625
2018-03-05	01:30:00	8.9375	9.1875	8.9375	17.1875	8.9375	9.3125	8.9375	5.9375	8.9375	7.4375	8.9375	6.25
2018-03-05	02:00:00	12.125	7.875	12.125	11.625	12.125	19.0625	12.125	11	12.125	3.375	12.125	6.3125
2018-03-05	02:30:00	7.8125	8.875	7.8125	16.4375	7.8125	15.5625	7.8125	7.8125	7.8125	11.3125	7.8125	1.9375
2018-03-05	03:00:00	11.1875	11.5	11.1875	16.9375	11.1875	13.125	11.1875	17.125	11.1875	6.875	11.1875	2.125
2018-03-05	03:30:00	10.75	14.3125	10.75	24.6875	10.75	13.25	10.75	19.9375	10.75	16.5625	10.75	7.8125
2018-03-05	04:00:00	21	21.875	21	26.5625	21	14.5625	21	29.875	21	20.625	21	15.6875
2018-03-05	04:30:00	32.9375	23.9375	32.9375	26.25	32.9375	30.9375	32.9375	44.375	32.9375	38.375	32.9375	16.5625
2018-03-05	05:00:00	57.6875	34.4375	57.6875	30.3125	57.6875	35.6875	57.6875	41.875	57.6875	44.0625	57.6875	19.5625
2018-03-05	05:30:00	52.25	49.75	52.25	36.875	52.25	37	52.25	40.4375	52.25	38.5625	52.25	41.25
2018-03-05	06:00:00	47.3125	53.3125	47.3125	53.375	47.3125	44.375	47.3125	54.75	47.3125	52.75	47.3125	47.0625
2018-03-05	06:30:00	58.6875	62.25	58.6875	56.3125	58.6875	59.9375	58.6875	51.6875	58.6875	59.875	58.6875	60.125
2018-03-05	07:00:00	63.8125	67.5	63.8125	77.375	63.8125	69.5	63.8125	64	63.8125	68.75	63.8125	61.9375
2018-03-05	07:30:00	74.8125	69.375	74.8125	78.125	74.8125	75.375	74.8125	62.375	74.8125	72.3125	74.8125	66.75
2018-03-05	08:00:00	72.25	80.3125	72.25	72.8125	72.25	81.125	72.25	73.75	72.25	77.6875	72.25	72.625
2018-03-05	08:30:00	86.1875	101.188	86.1875	104.5	86.1875	110.625	86.1875	100.75	86.1875	123	86.1875	99
2018-03-05	09:00:00	33.3125	43.25	33.3125	54	33.3125	51.75	33.3125	42.9375	33.3125	64.1875	33.3125	47.6875
2018-03-05	09:30:00	10.4375	25.4375	10.4375	34.5	10.4375	9.5625	10.4375	28.4375	10.4375	19.625	10.4375	21.125
2018-03-05	10:00:00	5.6875	3.25	5.6875	15.9375	5.6875	8.5625	5.6875	24.125	5.6875	9.5	5.6875	8.75
2018-03-05	10:30:00	6.5625	5.75	6.5625	15.25	6.5625	11.125	6.5625	15.25	6.5625	2.8125	6.5625	6.625
2018-03-05	11:00:00	7.875	3.4375	7.875	13.5	7.875	9.75	7.875	19.0625	7.875	7.8125	7.875	6.0625
2018-03-05	11:30:00	6	3.125	6	27.4375	6	4.75	6	10.0625	6	3.1875	6	8.5
2018-03-05	12:00:00	0.625	12.3125	0.625	32.5625	0.625	7.8125	0.625	11.4375	0.625	3.25	0.625	9.5
2018-03-05	12:30:00	8.5	12.0625	8.5	12.3125	8.5	11.125	8.5	17.375	8.5	5.125	8.5	16.3125
2018-03-05	13:00:00	19.8125	6.5	19.8125	16.6875	19.8125	4.5	19.8125	9.75	19.8125	1.9375	19.8125	15.3125
2018-03-05	13:30:00	15.5	18.4375	15.5	15.1875	15.5	10.875	15.5	20.5	15.5	9.0625	15.5	18.3125
2018-03-05	14:00:00	10.375	21.1875	10.375	38.6875	10.375	12.8125	10.375	12.4375	10.375	4.75	10.375	10.625
2018-03-05	14:30:00	6.75	18.4375	6.75	30.4375	6.75	26.125	6.75	17.375	6.75	14.9375	6.75	11.9375
2018-03-05	15:00:00	21.25	21.125	21.25	27.25	21.25	15.75	21.25	19.5625	21.25	10.375	21.25	12.4375
2018-03-05	15:30:00	20.6875	10.875	20.6875	8.9375	20.6875	9.75	20.6875	19.375	20.6875	18.3125	20.6875	13.0625
2018-03-05	16:00:00	28.3125	5.875	28.3125	26.5625	28.3125	3.125	28.3125	18.125	28.3125	15.0625	28.3125	10.1875
2018-03-05	16:30:00	19.375	11.6875	19.375	36.125	19.375	8.375	19.375	19.8125	19.375	21.4375	19.375	23.25
2018-03-05	17:00:00	12.6875	34.125	12.6875	25.5	12.6875	26.9375	12.6875	24.875	12.6875	20.0625	12.6875	29.0625
2018-03-05	17:30:00	12.1875	29.875	12.1875	27.0625	12.1875	27.625	12.1875	26.875	12.1875	35	12.1875	30.125
2018-03-05	18:00:00	47.875	29.5625	47.875	31.75	47.875	29.625	47.875	36.75	47.875	30.25	47.875	37.125
2018-03-05	18:30:00	41.25	21.5	41.25	34.5	41.25	36.25	41.25	45.75	41.25	25.9375	41.25	19
2018-03-05	19:00:00	24.1875	22.25	24.1875	32.4375	24.1875	33.875	24.1875	53.875	24.1875	27.5625	24.1875	33.625
2018-03-05	19:30:00	26.9375	23.375	26.9375	30.4375	26.9375	34.625	26.9375	32.875	26.9375	41.4375	26.9375	34.4375
2018-03-05	20:00:00	30.9375	31.75	30.9375	36.875	30.9375	25.3125	30.9375	25.375	30.9375	32.5625	30.9375	42.6875
2018-03-05	20:30:00	89.9375	90.5	89.9375	104.875	89.9375	80.5	89.9375	86.75	89.9375	91.25	89.9375	88.9375
2018-03-05	21:00:00	61	56.5625	61	53.9375	61	50.0625	61	49.125	61	44.875	61	58.25
2018-03-05	21:30:00	41.1875	38.8125	41.1875	33.6875	41.1875	28.1875	41.1875	29.4375	41.1875	20.5	41.1875	28.5625
2018-03-05	22:00:00	18.875	23	18.875	29.625	18.875	21.9375	18.875	18.625	18.875	11.25	18.875	12.5625
2018-03-05	22:30:00	8.0625	19.6875	8.0625	21.3125	8.0625	19.375	8.0625	7.75	8.0625	8.9375	8.0625	5.0625
2018-03-05	23:00:00	13	8.75	13	9	13	12.6875	13	14	13	9.5	13	8.3125
2018-03-05	23:30:00	5.75	8.4375	5.75	21.5	5.75	9.0625	5.75	8.0625	5.75	10.3125	5.75	8.6875
2018-03-06	00:00:00	2.9375	3.5625	2.9375	8.875	2.9375	9.1875	2.9375	2.875	2.9375	2.5	2.9375	2.875
2018-03-06	00:30:00	5.125	12	5.125	7.8125	5.125	8.3125	5.125	4.375	5.125	7.0625	5.125	2.1875
2018-03-06	01:00:00	10.75	10.75	10.75	11.8125	10.75	5.125	10.75	4.875	10.75	1.3125	10.75	4.375
2018-03-06	01:30:00	12.75	9	12.75	12.3125	12.75	5.4375	12.75	4.625	12.75	5.25	12.75	5.3125
2018-03-06	02:00:00	5	11.4375	5	11.3125	5	12.0625	5	5.375	5	6.75	5	1.8125
2018-03-06	02:30:00	5.375	8.375	5.375	10.3125	5.375	9.8125	5.375	10.8125	5.375	13	5.375	0.75
2018-03-06	03:00:00	10.9375	9.9375	10.9375	10.5	10.9375	15.375	10.9375	13.5	10.9375	9.1875	10.9375	5.4375
2018-03-06	03:30:00	25.3125	19.375	25.3125	7.25	25.3125	9.75	25.3125	14.875	25.3125	14.625	25.3125	4.0625
2018-03-06	04:00:00	20.875	24.4375	20.875	19.1875	20.875	14.6875	20.875	26.25	20.875	20.875	20.875	5.875
2018-03-06	04:30:00	34.875	31.375	34.875	18.625	34.875	33.9375	34.875	20.9375	34.875	32.25	34.875	10.875
2018-03-06	05:00:00	44.1875	39.5625	44.1875	35.8125	44.1875	40.3125	44.1875	37.375	44.1875	35.6875	44.1875	20.625
2018-03-06	05:30:00	56.625	42.375	56.625	41.25	56.625	49.875	56.625	53.5	56.625	41.625	56.625	27.5625
2018-03-06	06:00:00	52.4375	48.3125	52.4375	52.5	52.4375	52	52.4375	50.0625	52.4375	58.8125	52.4375	31.375
2018-03-06	06:30:00	49.125	61.0625	49.125	69.875	49.125	63.125	49.125	55.125	49.125	66.25	49.125	46.1875
2018-03-06	07:00:00	65.625	62.5	65.625	63.5	65.625	72.375	65.625	59.0625	65.625	63.125	65.625	57.0625
2018-03-06	07:30:00	61.5	73.6875	61.5	78.0625	61.5	83.25	61.5	67.125	61.5	67.4375	61.5	64.4375
2018-03-06	08:00:00	73.375	80.75	73.375	75.25	73.375	87.1875	73.375	71.6875	73.375	86.3125	73.375	72.6875
2018-03-06	08:30:00	73	87.125	73	107.188	73	102.875	73	95	73	109.938	73	83.9375
2018-03-06	09:00:00	20.8125	45.9375	20.8125	63.8125	20.8125	52.875	20.8125	50.4375	20.8125	70.9375	20.8125	33.5
2018-03-06	09:30:00	8.1875	18.5	8.1875	43.625	8.1875	25.3125	8.1875	27	8.1875	34.6875	8.1875	25.125
2018-03-06	10:00:00	4.875	8.5625	4.875	22.375	4.875	11	4.875	14	4.875	23.1875	4.875	10.4375
2018-03-06	10:30:00	5.5625	5.5625	5.5625	18.8125	5.5625	9.125	5.5625	10.8125	5.5625	10.25	5.5625	3.375
2018-03-06	11:00:00	4.6875	4.25	4.6875	19.4375	4.6875	8.3125	4.6875	9.9375	4.6875	5.625	4.6875	3.375
2018-03-06	11:30:00	0.9375	10.625	0.9375	10.3125	0.9375	5.6875	0.9375	6.9375	0.9375	12.75	0.9375	6
2018-03-06	12:00:00	2.0625	3.875	2.0625	5.9375	2.0625	3.0625	2.0625	9.5625	2.0625	8.625	2.0625	11.0625
2018-03-06	12:30:00	6	6	6	6.625	6	0.5625	6	12.375	6	1.9375	6	13.1875
2018-03-06	13:00:00	19.3125	1.9375	19.3125	12.6875	19.3125	2.25	19.3125	7.8125	19.3125	4.3125	19.3125	5.5625
2018-03-06	13:30:00	4.875	12.9375	4.875	28.5	4.875	7.125	4.875	8.875	4.875	13.4375	4.875	11.9375
2018-03-06	14:00:00	5.125	11.625	5.125	20.75	5.125	6.625	5.125	13.4375	5.125	6.9375	5.125	5.1875
2018-03-06	14:30:00	10.375	10.875	10.375	7.75	10.375	14.75	10.375	7.375	10.375	4.8125	10.375	13.3125
2018-03-06	15:00:00	15.625	10.125	15.625	7.9375	15.625	9.375	15.625	7.0625	15.625	4.25	15.625	4.125
2018-03-06	15:30:00	19.5625	13.5	19.5625	35.625	19.5625	7.125	19.5625	16.625	19.5625	7.375	19.5625	11.5625
2018-03-06	16:00:00	9.5	12.75	9.5	37.3125	9.5	5.375	9.5	12.3125	9.5	7.4375	9.5	10.75
2018-03-06	16:30:00	17.25	7.25	17.25	23.3125	17.25	8.875	17.25	14.9375	17.25	21.3125	17.25	16.25
2018-03-06	17:00:00	17.1875	5.5625	17.1875	18.25	17.1875	4.5	17.1875	13.25	17.1875	17.125	17.1875	16.75
2018-03-06	17:30:00	20.8125	9.875	20.8125	27.8125	20.8125	18.1875	20.8125	22.75	20.8125	26.8125	20.8125	12.1875
2018-03-06	18:00:00	16.5	22.9375	16.5	23.125	16.5	36.875	16.5	33.4375	16.5	29.0625	16.5	16.3125
2018-03-06	18:30:00	12.1875	29.5	12.1875	26	12.1875	21.3125	12.1875	36.0625	12.1875	35.5	12.1875	24
2018-03-06	19:00:00	22.125	39.625	22.125	25.6875	22.125	26.125	22.125	18.4375	22.125	21.375	22.125	36.25
2018-03-06	19:30:00	11	39.25	11	37.875	11	26.875	11	25.5	11	26.8125	11	24.4375
2018-03-06	20:00:00	18.4375	26.375	18.4375	34.1875	18.4375	18.125	18.4375	38.25	18.4375	33.4375	18.4375	26.5
2018-03-06	20:30:00	98.5625	95.125	98.5625	98.3125	98.5625	92.6875	98.5625	88.25	98.5625	91.5	98.5625	92.625
2018-03-06	21:00:00	53.8125	48.5	53.8125	57.6875	53.8125	46.4375	53.8125	46.6875	53.8125	50.125	53.8125	49.875
2018-03-06	21:30:00	26.5	26.0625	26.5	25.375	26.5	24.1875	26.5	16.25	26.5	22	26.5	19.4375
2018-03-06	22:00:00	13.625	12.625	13.625	22.1875	13.625	13.5	13.625	9.125	13.625	7.1875	13.625	6.875
2018-03-06	22:30:00	8.5	9.4375	8.5	13.4375	8.5	12.5625	8.5	4.6875	8.5	9.4375	8.5	5.5
2018-03-06	23:00:00	11.625	10.0625	11.625	6.375	11.625	7.3125	11.625	7.5	11.625	6.0625	11.625	7.4375
2018-03-06	23:30:00	2.5625	5.9375	2.5625	9.75	2.5625	5.375	2.5625	1.9375	2.5625	0.75	2.5625	0.375
2018-03-07	00:00:00	3.3125	9.25	3.3125	3.625	3.3125	8	3.3125	3.375	3.3125	2.125	3.3125	0.4375
2018-03-07	00:30:00	3.1875	2.25	3.1875	6.375	3.1875	4.3125	3.1875	2.0625	3.1875	0	3.1875	0
2018-03-07	01:00:00	1.875	10.0625	1.875	9.1875	1.875	8.25	1.875	2.9375	1.875	2.5625	1.875	1.0625
2018-03-07	01:30:00	3.6875	8.375	3.6875	10	3.6875	6.0625	3.6875	3.4375	3.6875	2.5	3.6875	1
2018-03-07	02:00:00	3.6875	5.0625	3.6875	12	3.6875	0.75	3.6875	4.8125	3.6875	5.9375	3.6875	7.3125
2018-03-07	02:30:00	7.875	12.4375	7.875	7.625	7.875	1	7.875	4.1875	7.875	2.1875	7.875	1.1875
2018-03-07	03:00:00	7	15.875	7	9.8125	7	4.4375	7	8.3125	7	10.6875	7	0.1875
2018-03-07	03:30:00	17	13.375	17	14.75	17	6.875	17	8.25	17	13.25	17	3.4375
2018-03-07	04:00:00	17.6875	22.875	17.6875	24.4375	17.6875	12.875	17.6875	21.4375	17.6875	19.8125	17.6875	2.875
2018-03-07	04:30:00	51.75	31.3125	51.75	25.875	51.75	25.25	51.75	38.25	51.75	29.75	51.75	20.3125
2018-03-07	05:00:00	42.25	42	42.25	41.0625	42.25	34.9375	42.25	31.6875	42.25	37.5	42.25	23.25
2018-03-07	05:30:00	56.5625	54.875	56.5625	43.25	56.5625	48.375	56.5625	41.625	56.5625	31.6875	56.5625	30.8125
2018-03-07	06:00:00	54.8125	55.25	54.8125	39.6875	54.8125	45.1875	54.8125	44.1875	54.8125	57.4375	54.8125	41.3125
2018-03-07	06:30:00	55.5	59.1875	55.5	60.25	55.5	63.25	55.5	52.6875	55.5	64.9375	55.5	51.5
2018-03-07	07:00:00	63.375	67.875	63.375	61.75	63.375	73.375	63.375	63.625	63.375	63.3125	63.375	63.125
2018-03-07	07:30:00	63.5625	75.625	63.5625	74.625	63.5625	78.625	63.5625	62.6875	63.5625	67.625	63.5625	65.75
2018-03-07	08:00:00	70.25	84.75	70.25	73.125	70.25	84.625	70.25	70.0625	70.25	76.25	70.25	71.75
2018-03-07	08:30:00	67.3125	81.625	67.3125	99	67.3125	93.5	67.3125	86.875	67.3125	109.938	67.3125	79.0625
2018-03-07	09:00:00	23.875	24.6875	23.875	39.5625	23.875	39.8125	23.875	35.0625	23.875	60.1875	23.875	27.1875
2018-03-07	09:30:00	8.4375	13.375	8.4375	25.625	8.4375	8.75	8.4375	17	8.4375	25.0625	8.4375	11.8125
2018-03-07	10:00:00	0.0625	4.625	0.0625	19	0.0625	6.375	0.0625	14.375	0.0625	9.25	0.0625	2.5
2018-03-07	10:30:00	0.3125	2.5	0.3125	13.9375	0.3125	6.875	0.3125	8	0.3125	3.5	0.3125	3.8125
2018-03-07	11:00:00	1.6875	1.8125	1.6875	14.875	1.6875	8.5625	1.6875	3.0625	1.6875	1.625	1.6875	11.1875
2018-03-07	11:30:00	4.5	4	4.5	18.1875	4.5	2.6875	4.5	8.9375	4.5	0.3125	4.5	7.9375
2018-03-07	12:00:00	2.25	4.125	2.25	9	2.25	12.5	2.25	4.5	2.25	1.25	2.25	2.75
2018-03-07	12:30:00	2.375	0.4375	2.375	8.5625	2.375	8.9375	2.375	0.125	2.375	6.3125	2.375	7.5
2018-03-07	13:00:00	3.25	10.4375	3.25	13	3.25	10.25	3.25	0.4375	3.25	4.75	3.25	4.375
2018-03-07	13:30:00	0.125	0.875	0.125	15.5625	0.125	12.8125	0.125	5.4375	0.125	10.5	0.125	6.125
2018-03-07	14:00:00	2.5	2.4375	2.5	2.875	2.5	15.125	2.5	6.6875	2.5	12.125	2.5	8.75
2018-03-07	14:30:00	2.8125	5	2.8125	3.5	2.8125	9.625	2.8125	3.8125	2.8125	2.25	2.8125	3.375
2018-03-07	15:00:00	11.875	8.0625	11.875	15.1875	11.875	0.5	11.875	4.0625	11.875	12.6875	11.875	1.875
2018-03-07	15:30:00	11	6.5625	11	17.25	11	1.8125	11	2.6875	11	7.625	11	0.3125
2018-03-07	16:00:00	10.8125	3.9375	10.8125	12.5	10.8125	12.5625	10.8125	9.75	10.8125	8.5	10.8125	3.375
2018-03-07	16:30:00	17.0625	9.5	17.0625	18.1875	17.0625	15.8125	17.0625	12.6875	17.0625	9.125	17.0625	17.0625
2018-03-07	17:00:00	10.375	8.5625	10.375	23.1875	10.375	20.75	10.375	15.6875	10.375	8	10.375	19.375
2018-03-07	17:30:00	7.9375	14.9375	7.9375	22	7.9375	17.125	7.9375	15.9375	7.9375	22.5	7.9375	26.3125
2018-03-07	18:00:00	20.5	18.375	20.5	9.375	20.5	23.4375	20.5	12.9375	20.5	42.75	20.5	32.375
2018-03-07	18:30:00	19	24.625	19	24.1875	19	28.3125	19	25.125	19	30.375	19	23.875
2018-03-07	19:00:00	14.875	31.1875	14.875	28.8125	14.875	22.5625	14.875	36.8125	14.875	12	14.875	17.5
2018-03-07	19:30:00	22.5625	30.75	22.5625	26.6875	22.5625	14.0625	22.5625	31.5625	22.5625	12.3125	22.5625	17.3125
2018-03-07	20:00:00	27.0625	27.4375	27.0625	36.375	27.0625	29.4375	27.0625	18.25	27.0625	17.9375	27.0625	15.5
2018-03-07	20:30:00	96.4375	94.3125	96.4375	87.5625	96.4375	94.0625	96.4375	79.5625	96.4375	96.5625	96.4375	85.0625
2018-03-07	21:00:00	45.3125	44.125	45.3125	37.375	45.3125	32.1875	45.3125	30.0625	45.3125	48.125	45.3125	38.4375
2018-03-07	21:30:00	19.875	18.875	19.875	23.4375	19.875	14.875	19.875	14.8125	19.875	13	19.875	6.375
2018-03-07	22:00:00	8.9375	7.1875	8.9375	14.375	8.9375	9.125	8.9375	7.5625	8.9375	7.25	8.9375	3.4375
2018-03-07	22:30:00	7.5	8.3125	7.5	9.0625	7.5	5.5	7.5	6.1875	7.5	4.75	7.5	0.9375
2018-03-07	23:00:00	7.5625	5.5	7.5625	2.875	7.5625	6.1875	7.5625	5.1875	7.5625	3	7.5625	0.5625
2018-03-07	23:30:00	8	5.625	8	2.125	8	4.9375	8	4.0625	8	2.3125	8	0.0625
2018-03-08	00:00:00	3.875	2.625	3.875	0.125	3.875	9.8125	3.875	7.8125	3.875	0.1875	3.875	0.0625
2018-03-08	00:30:00	3.8125	1.1875	3.8125	4.0625	3.8125	1.3125	3.8125	5.625	3.8125	0	3.8125	0.0625
2018-03-08	01:00:00	0.5	3.875	0.5	4.5	0.5	1.75	0.5	4.5625	0.5	0	0.5	0.3125
2018-03-08	01:30:00	3.4375	3.6875	3.4375	3.625	3.4375	1.75	3.4375	0.6875	3.4375	3.0625	3.4375	0
2018-03-08	02:00:00	2.8125	1.625	2.8125	7.1875	2.8125	4.0625	2.8125	2.1875	2.8125	4.1875	2.8125	0.875
2018-03-08	02:30:00	2.125	5.1875	2.125	2.3125	2.125	2.625	2.125	0.5625	2.125	12.1875	2.125	0.8125
2018-03-08	03:00:00	6.1875	7.25	6.1875	3	6.1875	0.5	6.1875	0.25	6.1875	7.0625	6.1875	1.9375
2018-03-08	03:30:00	12.8125	14.25	12.8125	11.8125	12.8125	3.625	12.8125	7.8125	12.8125	5.5625	12.8125	0.25
2018-03-08	04:00:00	14.75	20.25	14.75	17.1875	14.75	5.625	14.75	7.1875	14.75	17	14.75	3
2018-03-08	04:30:00	8.125	32.75	8.125	21.0625	8.125	22.3125	8.125	26.9375	8.125	22.4375	8.125	11.8125
2018-03-08	05:00:00	57.0625	46.8125	57.0625	30.9375	57.0625	48.25	57.0625	38.8125	57.0625	34.625	57.0625	18.375
2018-03-08	05:30:00	51.9375	48	51.9375	38.4375	51.9375	48.625	51.9375	47.9375	51.9375	51.3125	51.9375	37.125
2018-03-08	06:00:00	55	57.375	55	49.3125	55	45.1875	55	45	55	46.125	55	34.125
2018-03-08	06:30:00	47.625	60.0625	47.625	60.25	47.625	64.6875	47.625	50.75	47.625	67	47.625	49.375
2018-03-08	07:00:00	58.375	67	58.375	65.25	58.375	67.6875	58.375	61.75	58.375	63.5625	58.375	56.625
2018-03-08	07:30:00	67.875	74.9375	67.875	69.375	67.875	77.625	67.875	64.75	67.875	68.75	67.875	64.0625
2018-03-08	08:00:00	67.5625	76.625	67.5625	73.625	67.5625	81.0625	67.5625	71.75	67.5625	78.3125	67.5625	66.6875
2018-03-08	08:30:00	62.4375	75.875	62.4375	86.9375	62.4375	87.375	62.4375	88.6875	62.4375	101.688	62.4375	70.625
2018-03-08	09:00:00	21.6875	16.625	21.6875	30.75	21.6875	42.8125	21.6875	34.4375	21.6875	52.5	21.6875	22.0625
2018-03-08	09:30:00	9.625	0.625	9.625	14.1875	9.625	7.75	9.625	21.5625	9.625	23.1875	9.625	9.5
2018-03-08	10:00:00	4.5	1.0625	4.5	10.9375	4.5	9.1875	4.5	9.9375	4.5	10.1875	4.5	7.75
2018-03-08	10:30:00	0.25	0.5625	0.25	2.625	0.25	5.1875	0.25	7	0.25	0.25	0.25	0
2018-03-08	11:00:00	3.0625	3.5	3.0625	7.0625	3.0625	4.75	3.0625	3	3.0625	1.1875	3.0625	3.1875
2018-03-08	11:30:00	4.3125	5.375	4.3125	2	4.3125	1.5625	4.3125	11.25	4.3125	1.4375	4.3125	3.75
2018-03-08	12:00:00	0.75	7.5625	0.75	4.625	0.75	3.375	0.75	6.6875	0.75	3.6875	0.75	3.625
2018-03-08	12:30:00	0.125	5.5625	0.125	5.875	0.125	6.5	0.125	8.3125	0.125	3.8125	0.125	5.625
2018-03-08	13:00:00	0.1875	0.875	0.1875	13.875	0.1875	10.4375	0.1875	2.625	0.1875	3	0.1875	5.25
2018-03-08	13:30:00	1.375	3.75	1.375	14.8125	1.375	5.75	1.375	8.5	1.375	3.75	1.375	6.375
2018-03-08	14:00:00	2.1875	2.5	2.1875	11.5625	2.1875	7.6875	2.1875	12.125	2.1875	9.375	2.1875	1.5625
2018-03-08	14:30:00	3.1875	1.5625	3.1875	19.375	3.1875	12.625	3.1875	9.3125	3.1875	6.0625	3.1875	0.625
2018-03-08	15:00:00	6.8125	3.9375	6.8125	11.125	6.8125	12.5	6.8125	8.5	6.8125	23.625	6.8125	2.4375
2018-03-08	15:30:00	7.375	1.75	7.375	22.25	7.375	13.875	7.375	7.8125	7.375	14.4375	7.375	3.125
2018-03-08	16:00:00	7.5	1.3125	7.5	17.9375	7.5	8.375	7.5	15.1875	7.5	10.0625	7.5	4.4375
2018-03-08	16:30:00	12.8125	5.75	12.8125	23.9375	12.8125	5.6875	12.8125	12.5625	12.8125	15.5	12.8125	14.125
2018-03-08	17:00:00	14.8125	12.375	14.8125	25.125	14.8125	10.1875	14.8125	5.375	14.8125	15.9375	14.8125	23.625
2018-03-08	17:30:00	10.6875	25.1875	10.6875	26.3125	10.6875	12.4375	10.6875	13.8125	10.6875	11.9375	10.6875	10.5625
2018-03-08	18:00:00	6.75	24	6.75	22.25	6.75	10.4375	6.75	20.0625	6.75	10.875	6.75	16.875
2018-03-08	18:30:00	26.8125	19.375	26.8125	22.625	26.8125	34.5625	26.8125	41.0625	26.8125	17.125	26.8125	14.75
2018-03-08	19:00:00	22.3125	20.8125	22.3125	22.0625	22.3125	24.3125	22.3125	29.0625	22.3125	15.75	22.3125	28.5625
2018-03-08	19:30:00	13.875	34.4375	13.875	16.75	13.875	7.1875	13.875	21.5625	13.875	22.3125	13.875	16.9375
2018-03-08	20:00:00	6.3125	25.0625	6.3125	26.25	6.3125	16	6.3125	28.125	6.3125	32.875	6.3125	14
2018-03-08	20:30:00	93.75	92.8125	93.75	88.625	93.75	91.125	93.75	76.125	93.75	97	93.75	78.875
2018-03-08	21:00:00	45.4375	42	45.4375	37.25	45.4375	42.875	45.4375	25.625	45.4375	44.375	45.4375	37.0625
2018-03-08	21:30:00	14.4375	19.875	14.4375	20.125	14.4375	15.625	14.4375	6.875	14.4375	12.25	14.4375	13.0625
2018-03-08	22:00:00	8.9375	11.5625	8.9375	11.0625	8.9375	7.125	8.9375	10.3125	8.9375	6.25	8.9375	5.375
2018-03-08	22:30:00	5.0625	4.3125	5.0625	4.4375	5.0625	5.8125	5.0625	4.1875	5.0625	1.5625	5.0625	0.75
2018-03-08	23:00:00	3.125	1.5	3.125	3.8125	3.125	5.75	3.125	5.0625	3.125	0.625	3.125	2.875
2018-03-08	23:30:00	7.375	0.8125	7.375	1.9375	7.375	1.375	7.375	4	7.375	1.3125	7.375	1.75
2018-03-09	00:00:00	1.1875	8.0625	1.1875	4.375	1.1875	0.8125	1.1875	2.1875	1.1875	0.1875	1.1875	0.375
2018-03-09	00:30:00	1.375	6	1.375	5.9375	1.375	4.0625	1.375	3.1875	1.375	0.0625	1.375	2.9375
2018-03-09	01:00:00	2	3.9375	2	1.5	2	2.125	2	3	2	4.625	2	0.6875
2018-03-09	01:30:00	1.5625	2.0625	1.5625	5.125	1.5625	2.3125	1.5625	3	1.5625	0.125	1.5625	0.25
2018-03-09	02:00:00	2.1875	2.375	2.1875	3.8125	2.1875	1.5	2.1875	3.375	2.1875	4.0625	2.1875	0.0625
2018-03-09	02:30:00	7.4375	1.875	7.4375	6.625	7.4375	1.5	7.4375	3	7.4375	3.125	7.4375	1.0625
2018-03-09	03:00:00	9.9375	6.5625	9.9375	10.375	9.9375	0.0625	9.9375	5.25	9.9375	3.8125	9.9375	0
2018-03-09	03:30:00	12.625	13.125	12.625	18.6875	12.625	8.875	12.625	11.0625	12.625	8.6875	12.625	0.5
2018-03-09	04:00:00	16.625	22.125	16.625	15.1875	16.625	8	16.625	6.8125	16.625	14.1875	16.625	3.0625
2018-03-09	04:30:00	38.3125	29	38.3125	25.875	38.3125	15.6875	38.3125	30.375	38.3125	32.1875	38.3125	3.3125
2018-03-09	05:00:00	46.625	37.375	46.625	39.25	46.625	20.5	46.625	21.4375	46.625	37.3125	46.625	22.5625
2018-03-09	05:30:00	41.3125	46.8125	41.3125	39.8125	41.3125	39.6875	41.3125	48.375	41.3125	49.75	41.3125	28.5625
2018-03-09	06:00:00	49.8125	52.375	49.8125	51.0625	49.8125	57.625	49.8125	45.125	49.8125	53.375	49.8125	42.4375
2018-03-09	06:30:00	51.1875	60.4375	51.1875	62.875	51.1875	61.4375	51.1875	57.3125	51.1875	67.75	51.1875	54.0625
2018-03-09	07:00:00	57.0625	66.5625	57.0625	63.375	57.0625	75.625	57.0625	61.0625	57.0625	64.75	57.0625	54
2018-03-09	07:30:00	60.125	70.0625	60.125	64.875	60.125	78.375	60.125	62.875	60.125	67.0625	60.125	65
2018-03-09	08:00:00	61.0625	75.75	61.0625	60.0625	61.0625	81	61.0625	68.0625	61.0625	71.9375	61.0625	55.25
2018-03-09	08:30:00	55.3125	66.375	55.3125	76.125	55.3125	84.5625	55.3125	82	55.3125	104.438	55.3125	69
2018-03-09	09:00:00	15.3125	19.75	15.3125	30.125	15.3125	33.25	15.3125	37.9375	15.3125	47	15.3125	18.25
2018-03-09	09:30:00	12.9375	0	12.9375	27.25	12.9375	9.875	12.9375	19.375	12.9375	27.125	12.9375	6
2018-03-09	10:00:00	3.75	33	3.75	14.1875	3.75	6.9375	3.75	12.75	3.75	1.3125	3.75	3.0625
2018-03-09	10:30:00	4.125	0.75	4.125	10.75	4.125	1.5625	4.125	8.125	4.125	2.4375	4.125	2.0625
2018-03-09	11:00:00	2.375	0.0625	2.375	9.875	2.375	4.0625	2.375	4.1875	2.375	1.125	2.375	0.8125
2018-03-09	11:30:00	2.9375	0.4375	2.9375	0	2.9375	1.9375	2.9375	0.8125	2.9375	5.375	2.9375	6.3125
2018-03-09	12:00:00	2.625	0.625	2.625	23.625	2.625	7.5625	2.625	5	2.625	4.8125	2.625	0.1875
2018-03-09	12:30:00	1.625	0.5	1.625	4.625	1.625	6	1.625	4.0625	1.625	9.875	1.625	0.125
2018-03-09	13:00:00	4.75	1.8125	4.75	7.125	4.75	15.0625	4.75	1.625	4.75	4.125	4.75	7.125
2018-03-09	13:30:00	3.75	1.625	3.75	4.625	3.75	0	3.75	8.125	3.75	4.6875	3.75	5.6875
2018-03-09	14:00:00	5.25	1.6875	5.25	5.8125	5.25	17.625	5.25	13.4375	5.25	2	5.25	2.5
2018-03-09	14:30:00	4.125	1	4.125	3.0625	4.125	0.6875	4.125	9.1875	4.125	2.1875	4.125	5.375
2018-03-09	15:00:00	5	13.75	5	13.3125	5	1	5	10.6875	5	1.1875	5	11.375
2018-03-09	15:30:00	4.3125	10.1875	4.3125	18.4375	4.3125	7	4.3125	0	4.3125	10.4375	4.3125	13
2018-03-09	16:00:00	4.9375	8.0625	4.9375	13.5	4.9375	7.4375	4.9375	27.8125	4.9375	24.375	4.9375	6.375
2018-03-09	16:30:00	17.5625	9.1875	17.5625	18.9375	17.5625	5.1875	17.5625	13.1875	17.5625	11.125	17.5625	9.5625
2018-03-09	17:00:00	22.75	10.5625	22.75	13.625	22.75	9.875	22.75	13.4375	22.75	16.4375	22.75	9.1875
2018-03-09	17:30:00	14.3125	10.0625	14.3125	15.5625	14.3125	9.5625	14.3125	17.0625	14.3125	0	14.3125	15.25
2018-03-09	18:00:00	11.5	8.5	11.5	16.1875	11.5	15.875	11.5	17	11.5	50.1875	11.5	25.375
2018-03-09	18:30:00	14.125	7.8125	14.125	15.9375	14.125	19.1875	14.125	9.5	14.125	27.0625	14.125	15.3125
2018-03-09	19:00:00	11.25	14.375	11.25	8.375	11.25	18.0625	11.25	15.25	11.25	18.1875	11.25	10.9375
2018-03-09	19:30:00	20.5625	8.0625	20.5625	25.5	20.5625	22.875	20.5625	33.5	20.5625	35.375	20.5625	51.1875
2018-03-09	20:00:00	14.9375	16.3125	14.9375	25.625	14.9375	27.4375	14.9375	27.875	14.9375	20.3125	14.9375	16.9375
2018-03-09	20:30:00	21.9375	17.3125	21.9375	16.8125	21.9375	32.0625	21.9375	32.25	21.9375	16.75	21.9375	13.625
2018-03-09	21:00:00	23.25	24.8125	23.25	24.8125	23.25	18	23.25	34.9375	23.25	26.5	23.25	14.5
2018-03-09	21:30:00	14.1875	23.4375	14.1875	18.75	14.1875	14.375	14.1875	33.875	14.1875	35.9375	14.1875	16.6875
2018-03-09	22:00:00	23.5	26.25	23.5	29.375	23.5	26.8125	23.5	28.25	23.5	32.6875	23.5	16
2018-03-09	22:30:00	24.75	20.8125	24.75	39.25	24.75	28.1875	24.75	18.625	24.75	27.25	24.75	14.0625
2018-03-09	23:00:00	16.125	15.9375	16.125	32.375	16.125	30.3125	16.125	24.75	16.125	29.9375	16.125	29.4375
2018-03-09	23:30:00	26.0625	27.875	26.0625	21.5	26.0625	31.25	26.0625	22.875	26.0625	35.125	26.0625	19.125
2018-03-10	00:00:00	10.6875	20.5625	10.6875	14.4375	10.6875	18.9375	10.6875	39.875	10.6875	39.0625	10.6875	11.5625
2018-03-10	00:30:00	17.625	16.4375	17.625	19.875	17.625	24.8125	17.625	38.375	17.625	21.0625	17.625	14.3125
2018-03-10	01:00:00	21.375	15.5	21.375	22.1875	21.375	36	21.375	28.75	21.375	44.8125	21.375	23.3125
2018-03-10	01:30:00	8.9375	10.1875	8.9375	21.75	8.9375	26	8.9375	39.25	8.9375	47.875	8.9375	41.3125
2018-03-10	02:00:00	19	24.8125	19	27.75	19	25.625	19	46	19	54.8125	19	53.875
2018-03-10	02:30:00	25.25	21.75	25.25	21.625	25.25	31.75	25.25	52.375	25.25	53.5	25.25	48.625
2018-03-10	03:00:00	20.875	25.1875	20.875	31.4375	20.875	35	20.875	48.625	20.875	61.5	20.875	49.9375
2018-03-10	03:30:00	48.1875	32	48.1875	31.5	48.1875	29.75	48.1875	50.625	48.1875	54.5625	48.1875	44.875
2018-03-10	04:00:00	48.6875	32.625	48.6875	37.6875	48.6875	22.6875	48.6875	41.6875	48.6875	46.1875	48.6875	59.4375
2018-03-10	04:30:00	38.4375	24.25	38.4375	27.875	38.4375	25.8125	38.4375	48.75	38.4375	53.0625	38.4375	53.1875
2018-03-10	05:00:00	47.875	38.375	47.875	35.875	47.875	40.5	47.875	44.25	47.875	50.375	47.875	44.375
2018-03-10	05:30:00	42.25	40.3125	42.25	41.25	42.25	32.125	42.25	49.9375	42.25	51.1875	42.25	46.75
2018-03-10	06:00:00	35.4375	47.625	35.4375	38	35.4375	26.25	35.4375	55.1875	35.4375	62.625	35.4375	50.8125
2018-03-10	06:30:00	32.4375	38.8125	32.4375	33.125	32.4375	48.375	32.4375	42.9375	32.4375	47.375	32.4375	48.375
2018-03-10	07:00:00	40.125	35	40.125	50.0625	40.125	46.0625	40.125	39.5	40.125	36.875	40.125	60.5625
2018-03-10	07:30:00	40.3125	29.6875	40.3125	35.375	40.3125	53.3125	40.3125	40.875	40.3125	39.875	40.3125	51
2018-03-10	08:00:00	30	24.6875	30	41.125	30	43.375	30	35.25	30	36.375	30	38.4375
2018-03-10	08:30:00	35.25	26.5	35.25	51.8125	35.25	36.9375	35.25	36.6875	35.25	19.625	35.25	23.25
2018-03-10	09:00:00	30.8125	32.3125	30.8125	38.4375	30.8125	46.75	30.8125	40.8125	30.8125	18.125	30.8125	15.875
2018-03-10	09:30:00	25.6875	28.5625	25.6875	42.625	25.6875	45.1875	25.6875	51.5625	25.6875	9	25.6875	11
2018-03-10	10:00:00	24.25	25.5	24.25	49	24.25	45.25	24.25	32.0625	24.25	3	24.25	8.0625
2018-03-10	10:30:00	11.8125	19.1875	11.8125	29.1875	11.8125	45.375	11.8125	24.75	11.8125	0.5	11.8125	12
2018-03-10	11:00:00	4.25	16.4375	4.25	35.75	4.25	56.375	4.25	13.375	4.25	3.375	4.25	7.5
2018-03-10	11:30:00	0.4375	6.5625	0.4375	38.4375	0.4375	42.3125	0.4375	6.6875	0.4375	5.5	0.4375	3.1875
2018-03-10	12:00:00	16.8125	4.3125	16.8125	35.375	16.8125	27.125	16.8125	4.25	16.8125	5.75	16.8125	5.3125
2018-03-10	12:30:00	4.9375	4.75	4.9375	31.5	4.9375	18.3125	4.9375	2.375	4.9375	5.125	4.9375	14.375
2018-03-10	13:00:00	0.5	5.75	0.5	22.9375	0.5	9.5625	0.5	2.75	0.5	11.875	0.5	8.375
2018-03-10	13:30:00	0	2.1875	0	26.375	0	10.625	0	10.5	0	13.375	0	10.4375
2018-03-10	14:00:00	6.3125	5.5625	6.3125	20.1875	6.3125	20.9375	6.3125	6.9375	6.3125	5.875	6.3125	1.3125
2018-03-10	14:30:00	2	8.5625	2	12.3125	2	18	2	0	2	11.6875	2	6.8125
2018-03-10	15:00:00	5.875	3	5.875	9.5625	5.875	10.1875	5.875	0.1875	5.875	3.125	5.875	3.75
2018-03-10	15:30:00	9.1875	4	9.1875	10.875	9.1875	6.1875	9.1875	14.9375	9.1875	10	9.1875	3.6875
2018-03-10	16:00:00	14.5	6.3125	14.5	4.625	14.5	8	14.5	12.8125	14.5	16.4375	14.5	13.875
2018-03-10	16:30:00	6.3125	3.4375	6.3125	19.75	6.3125	2.4375	6.3125	15.4375	6.3125	15.8125	6.3125	11.1875
2018-03-10	17:00:00	10.75	6.9375	10.75	11.75	10.75	4.875	10.75	14.9375	10.75	15.3125	10.75	10.25
2018-03-10	17:30:00	10.625	7.4375	10.625	15.9375	10.625	10.25	10.625	10.0625	10.625	18.1875	10.625	19.75
2018-03-10	18:00:00	25.5	4.25	25.5	14.125	25.5	3.4375	25.5	10.125	25.5	23.0625	25.5	17.3125
2018-03-10	18:30:00	4.3125	3.5625	4.3125	12.375	4.3125	8.3125	4.3125	14.1875	4.3125	25.4375	4.3125	15.875
2018-03-10	19:00:00	7.3125	5	7.3125	9.5	7.3125	11.9375	7.3125	20.5	7.3125	20	7.3125	12.8125
2018-03-10	19:30:00	5.5	7.25	5.5	10.6875	5.5	17.5625	5.5	23.4375	5.5	16.1875	5.5	27.875
2018-03-10	20:00:00	12.5	19.4375	12.5	13.875	12.5	12.4375	12.5	23.6875	12.5	13	12.5	18.625
2018-03-10	20:30:00	19.1875	15.5	19.1875	25.5625	19.1875	12.8125	19.1875	15.5625	19.1875	21.0625	19.1875	5.6875
2018-03-10	21:00:00	20.625	26.0625	20.625	33.5	20.625	19.6875	20.625	26.9375	20.625	22.1875	20.625	6.4375
2018-03-10	21:30:00	20.875	18.5625	20.875	21.875	20.875	17.875	20.875	35.9375	20.875	12.25	20.875	26.5
2018-03-10	22:00:00	5.5625	14.5	5.5625	28.5	5.5625	18.4375	5.5625	25.3125	5.5625	16.6875	5.5625	22.3125
2018-03-10	22:30:00	17.9375	10.75	17.9375	8.9375	17.9375	24.5	17.9375	20.75	17.9375	27.0625	17.9375	26.25
2018-03-10	23:00:00	10.5	18.375	10.5	18.5625	10.5	23	10.5	16.3125	10.5	28.3125	10.5	14.375
2018-03-10	23:30:00	16	20.9375	16	27.4375	16	20.125	16	18.25	16	36.1875	16	19.6875
2018-03-11	00:00:00	17.25	17.5625	17.25	26.5625	17.25	23.75	17.25	22.5	17.25	39.6875	17.25	24.125
2018-03-11	00:30:00	4.0625	11.0625	4.0625	28	4.0625	25.0625	4.0625	27.625	4.0625	29.875	4.0625	35.875
2018-03-11	01:00:00	20.6875	18.4375	20.6875	31.125	20.6875	20	20.6875	22.6875	20.6875	34.625	20.6875	48.875
2018-03-11	01:30:00	19.875	17.25	19.875	17.0625	19.875	19.6875	19.875	33.5	19.875	51.375	19.875	46
2018-03-11	02:00:00	47.5625	11.375	47.5625	13	47.5625	21.9375	47.5625	34.1875	47.5625	55.6875	47.5625	38.375
2018-03-11	02:30:00	30.5	28.8125	30.5	17.25	30.5	26.375	30.5	36.8125	30.5	48.375	30.5	44
2018-03-11	03:00:00	24.5625	25.8125	24.5625	19.625	24.5625	29.0625	24.5625	33.25	24.5625	51.8125	24.5625	39.9375
2018-03-11	03:30:00	42.75	25.875	42.75	27.4375	42.75	31.375	42.75	35.75	42.75	48.9375	42.75	49.375
2018-03-11	04:00:00	30.375	26.9375	30.375	33.4375	30.375	29	30.375	46.0625	30.375	48.5625	30.375	40.3125
2018-03-11	04:30:00	28.9375	15.875	28.9375	26.25	28.9375	42	28.9375	40.5	28.9375	52.4375	28.9375	49.6875
2018-03-11	05:00:00	40.9375	26.1875	40.9375	40.125	40.9375	35.875	40.9375	36.375	40.9375	44.125	40.9375	42.4375
2018-03-11	05:30:00	44.375	25.1875	44.375	23.9375	44.375	23.5	44.375	43.4375	44.375	48.3125	44.375	42.375
2018-03-11	06:00:00	32.8125	30.8125	32.8125	36.875	32.8125	32.3125	32.8125	38.9375	32.8125	53.9375	32.8125	45.4375
2018-03-11	06:30:00	36.8125	32.5625	36.8125	35.25	36.8125	38.0625	36.8125	48.875	36.8125	51.25	36.8125	55.6875
2018-03-11	07:00:00	35.4375	34.4375	35.4375	37.625	35.4375	39.25	35.4375	41.9375	35.4375	61.625	35.4375	46.1875
2018-03-11	07:30:00	32.1875	33.875	32.1875	40.6875	32.1875	42.25	32.1875	32.3125	32.1875	45.5	32.1875	50.75
2018-03-11	08:00:00	36.8125	31.4375	36.8125	38	36.8125	26.5	36.8125	39.6875	36.8125	43.1875	36.8125	46.3125
2018-03-11	08:30:00	27.625	33.6875	27.625	34.875	27.625	44.25	27.625	52.5	27.625	29	27.625	25.25
2018-03-11	09:00:00	36.1875	37.3125	36.1875	39.3125	36.1875	48	36.1875	50.5625	36.1875	30	36.1875	14.125
2018-03-11	09:30:00	34.8125	30.875	34.8125	41.625	34.8125	50.0625	34.8125	40.5625	34.8125	20.75	34.8125	7.625
2018-03-11	10:00:00	27.875	27.375	27.875	34.625	27.875	46.1875	27.875	27.5625	27.875	6.25	27.875	13.1875
2018-03-11	10:30:00	17.3125	25.5625	17.3125	42.0625	17.3125	42.375	17.3125	19.125	17.3125	1.5	17.3125	6.6875
2018-03-11	11:00:00	12.5625	24.4375	12.5625	49.6875	12.5625	52.9375	12.5625	11.375	12.5625	0.0625	12.5625	14.625
2018-03-11	11:30:00	7.875	17	7.875	35.9375	7.875	54.75	7.875	11.9375	7.875	2.8125	7.875	1.5625
2018-03-11	12:00:00	2.6875	8.5	2.6875	40	2.6875	51.1875	2.6875	21.1875	2.6875	8	2.6875	7
2018-03-11	12:30:00	0	1.8125	0	46.375	0	40.3125	0	3.4375	0	0	0	10.25
2018-03-11	13:00:00	0.3125	0.0625	0.3125	28.0625	0.3125	36.875	0.3125	8.0625	0.3125	10.4375	0.3125	3.5625
2018-03-11	13:30:00	2.5625	5.1875	2.5625	30.75	2.5625	26.5625	2.5625	3.375	2.5625	9.625	2.5625	10.5625
2018-03-11	14:00:00	9.5	0.0625	9.5	19.625	9.5	17.1875	9.5	8.375	9.5	7.125	9.5	7.5
2018-03-11	14:30:00	9.5	2.5625	9.5	24.625	9.5	11.9375	9.5	5.6875	9.5	14	9.5	5.25
2018-03-11	15:00:00	8	3.9375	8	12.875	8	4.9375	8	7.8125	8	5.1875	8	8.625
2018-03-11	15:30:00	7.6875	2.5625	7.6875	10.3125	7.6875	5.8125	7.6875	23.625	7.6875	4.1875	7.6875	4.8125
2018-03-11	16:00:00	8.9375	16.5625	8.9375	9.5625	8.9375	5.625	8.9375	14.625	8.9375	8.6875	8.9375	6.9375
2018-03-11	16:30:00	3.375	4.9375	3.375	5.3125	3.375	5.8125	3.375	13.0625	3.375	10.6875	3.375	11.9375
2018-03-11	17:00:00	9.8125	7.3125	9.8125	9.875	9.8125	11.625	9.8125	6.6875	9.8125	18.625	9.8125	5.375
2018-03-11	17:30:00	9	2.0625	9	8.0625	9	1	9	2.5	9	20.3125	9	9.875
2018-03-11	18:00:00	12.25	7.4375	12.25	17.875	12.25	10.25	12.25	5.6875	12.25	23.4375	12.25	15.375
2018-03-11	18:30:00	6.125	9.5	6.125	17	6.125	7.625	6.125	25.9375	6.125	15.75	6.125	18.5625
2018-03-11	19:00:00	8.25	3.75	8.25	24.1875	8.25	9.8125	8.25	15.875	8.25	16.6875	8.25	8.125
2018-03-11	19:30:00	17.125	2.8125	17.125	11.375	17.125	12.75	17.125	6.75	17.125	20.125	17.125	6.75
2018-03-11	20:00:00	10.125	10	10.125	11.1875	10.125	5.1875	10.125	11.0625	10.125	15.5	10.125	24
2018-03-11	20:30:00	17.75	8.125	17.75	17.375	17.75	5.125	17.75	15.5	17.75	21.125	17.75	12.0625
2018-03-11	21:00:00	18.5	7.9375	18.5	21.4375	18.5	9.5625	18.5	21.3125	18.5	12.625	18.5	17.0625
2018-03-11	21:30:00	12.125	12.5625	12.125	17.375	12.125	17.0625	12.125	22.25	12.125	14.5625	12.125	10.25
2018-03-11	22:00:00	13.1875	11.25	13.1875	16.75	13.1875	18	13.1875	27.375	13.1875	16.5625	13.1875	9.875
2018-03-11	22:30:00	8.9375	12.1875	8.9375	17.125	8.9375	28.125	8.9375	26.5625	8.9375	14.125	8.9375	22.75
2018-03-11	23:00:00	18.8125	23.5	18.8125	17.8125	18.8125	20.625	18.8125	10.4375	18.8125	26.75	18.8125	11
2018-03-11	23:30:00	14.1875	20.4375	14.1875	25.875	14.1875	17.125	14.1875	19.25	14.1875	29.0625	14.1875	14.0625
2018-03-12	00:00:00	3.3125	18.4375	3.3125	22.6875	3.3125	10.75	3.3125	26	3.3125	36.0625	3.3125	29.6875
2018-03-12	00:30:00	6.4375	18.125	6.4375	22.3125	6.4375	15.9375	6.4375	12.25	6.4375	37.875	6.4375	26.625
2018-03-12	01:00:00	19.4375	18.9375	19.4375	31.375	19.4375	29.5625	19.4375	33.875	19.4375	46.875	19.4375	45.3125
2018-03-12	01:30:00	40.625	29.5625	40.625	22.5625	40.625	23.875	40.625	38	40.625	67.6875	40.625	56
2018-03-12	02:00:00	30	28	30	21.1875	30	13.5	30	16.625	30	44.0625	30	48.625
2018-03-12	02:30:00	15.5	19.25	15.5	21.5625	15.5	7.1875	15.5	21.3125	15.5	34.4375	15.5	27.6875
2018-03-12	03:00:00	21.625	23.125	21.625	21.125	21.625	25.5625	21.625	26.375	21.625	48.1875	21.625	51.625
2018-03-12	03:30:00	24.9375	25.5625	24.9375	18.9375	24.9375	26.875	24.9375	41	24.9375	50.875	24.9375	38.75
2018-03-12	04:00:00	31.375	21	31.375	19.375	31.375	30.3125	31.375	34.375	31.375	48	31.375	29.3125
2018-03-12	04:30:00	30.3125	19.1875	30.3125	21.8125	30.3125	27.625	30.3125	37.75	30.3125	46.1875	30.3125	42.4375
2018-03-12	05:00:00	29.625	30.5	29.625	39	29.625	27.9375	29.625	40.1875	29.625	36.9375	29.625	45.6875
2018-03-12	05:30:00	37.6875	40	37.6875	40.625	37.6875	30	37.6875	36.5625	37.6875	48.0625	37.6875	47.6875
2018-03-12	06:00:00	37.375	25.9375	37.375	36	37.375	24.875	37.375	45.5	37.375	50.25	37.375	44.8125
2018-03-12	06:30:00	34.875	30.375	34.875	28.25	34.875	29.4375	34.875	41.5	34.875	51.0625	34.875	51.875
2018-03-12	07:00:00	47.25	35.1875	47.25	45.9375	47.25	40.5	47.25	43.1875	47.25	53.875	47.25	46.8125
2018-03-12	07:30:00	43.625	45.75	43.625	42.6875	43.625	37.625	43.625	48.3125	43.625	51.6875	43.625	49.0625
2018-03-12	08:00:00	34.0625	25.625	34.0625	37.125	34.0625	29.6875	34.0625	44.125	34.0625	44.6875	34.0625	43.75
2018-03-12	08:30:00	24.125	36.125	24.125	42.0625	24.125	34.1875	24.125	45.4375	24.125	50.8125	24.125	39.5
2018-03-12	09:00:00	29.75	26.25	29.75	39.1875	29.75	32.75	29.75	37.5	29.75	37.6875	29.75	34.5625
2018-03-12	09:30:00	40.5	35.5625	40.5	35.6875	40.5	36.0625	40.5	40.875	40.5	29.625	40.5	17.6875
2018-03-12	10:00:00	33.75	30	33.75	43.5	33.75	47.625	33.75	37.125	33.75	15.9375	33.75	24.5
2018-03-12	10:30:00	29	27.1875	29	53.8125	29	40.875	29	35.3125	29	2.5	29	14.5
2018-03-12	11:00:00	21	32.25	21	51.25	21	38.0625	21	26.0625	21	8	21	5.3125
2018-03-12	11:30:00	7.25	32.5625	7.25	47	7.25	36.125	7.25	18.875	7.25	6.5625	7.25	5.25
2018-03-12	12:00:00	5.9375	16.875	5.9375	44.75	5.9375	43.25	5.9375	20.25	5.9375	10.25	5.9375	8.375
2018-03-12	12:30:00	6.625	4.8125	6.625	47.125	6.625	42.25	6.625	11.9375	6.625	5.375	6.625	5.5625
2018-03-12	13:00:00	4.125	11.1875	4.125	34.9375	4.125	37.5	4.125	3.8125	4.125	5.4375	4.125	9.8125
2018-03-12	13:30:00	10.6875	6.3125	10.6875	30.5	10.6875	37.625	10.6875	5.5625	10.6875	8.75	10.6875	5.625
2018-03-12	14:00:00	17.375	5.9375	17.375	23	17.375	26.4375	17.375	0	17.375	9.6875	17.375	4.6875
2018-03-12	14:30:00	1.9375	0.5	1.9375	14.6875	1.9375	22.625	1.9375	2.6875	1.9375	7.125	1.9375	4.875
2018-03-12	15:00:00	2.0625	6.9375	2.0625	11.8125	2.0625	11.5	2.0625	0.25	2.0625	6.8125	2.0625	11.4375
2018-03-12	15:30:00	6.0625	5.0625	6.0625	15.875	6.0625	4.75	6.0625	7.5625	6.0625	2.3125	6.0625	8.9375
2018-03-12	16:00:00	8.375	3.4375	8.375	11.0625	8.375	2.1875	8.375	9.8125	8.375	13.25	8.375	8.8125
2018-03-12	16:30:00	4.5625	4.3125	4.5625	8.5625	4.5625	4.75	4.5625	12.8125	4.5625	16.875	4.5625	8.75
2018-03-12	17:00:00	3.1875	5.9375	3.1875	8.1875	3.1875	10.5	3.1875	10.3125	3.1875	8.5	3.1875	14.8125
2018-03-12	17:30:00	3.25	8.375	3.25	11.75	3.25	5.875	3.25	6	3.25	13.5625	3.25	14.75
2018-03-12	18:00:00	4.9375	10.625	4.9375	12.8125	4.9375	2.5625	4.9375	5.1875	4.9375	16.9375	4.9375	14.125
2018-03-12	18:30:00	1.3125	7.5625	1.3125	8.1875	1.3125	5.5	1.3125	14.5	1.3125	17.875	1.3125	18.5
2018-03-12	19:00:00	3.875	15	3.875	14.1875	3.875	10.375	3.875	12.875	3.875	26.4375	3.875	15.75
2018-03-12	19:30:00	7.5	4.25	7.5	5.9375	7.5	9.875	7.5	12.8125	7.5	14.75	7.5	12
2018-03-12	20:00:00	13.6875	1.25	13.6875	8.125	13.6875	12.5625	13.6875	20.6875	13.6875	5.6875	13.6875	14.625
2018-03-12	20:30:00	14.875	8.5	14.875	16.4375	14.875	9.1875	14.875	11.1875	14.875	18.8125	14.875	19.8125
2018-03-12	21:00:00	14.8125	10.5	14.8125	24.125	14.8125	13.8125	14.8125	9.5	14.8125	21.625	14.8125	10.5625
2018-03-12	21:30:00	17.6875	19.125	17.6875	11.1875	17.6875	14.0625	17.6875	25	17.6875	23.875	17.6875	21.25
2018-03-12	22:00:00	11.5625	24.8125	11.5625	11.5625	11.5625	13.625	11.5625	21.9375	11.5625	20.5	11.5625	15.25
2018-03-12	22:30:00	12.375	15.25	12.375	15.8125	12.375	8.8125	12.375	17.4375	12.375	18.5625	12.375	17.25
2018-03-12	23:00:00	14.5	10.5	14.5	23.1875	14.5	18.1875	14.5	19.1875	14.5	23.8125	14.5	13.25
2018-03-12	23:30:00	10.625	7	10.625	21.875	10.625	17.1875	10.625	17.75	10.625	25.6875	10.625	9.4375
2018-03-13	00:00:00	7.5625	20.375	7.5625	18.9375	7.5625	18	7.5625	6.125	7.5625	25.8125	7.5625	26.3125
2018-03-13	00:30:00	10.1875	15.5	10.1875	18.5625	10.1875	19.6875	10.1875	13.75	10.1875	29.3125	10.1875	31.6875
2018-03-13	01:00:00	10.875	17.875	10.875	27.625	10.875	9.75	10.875	33.5625	10.875	30.9375	10.875	30
2018-03-13	01:30:00	11.125	6.5625	11.125	7.6875	11.125	12.3125	11.125	15.5	11.125	46.5	11.125	30.875
2018-03-13	02:00:00	17.1875	10.8125	17.1875	11.5	17.1875	6.4375	17.1875	14.5	17.1875	42.125	17.1875	38.6875
2018-03-13	02:30:00	19.875	4.75	19.875	16.25	19.875	12.9375	19.875	33.1875	19.875	40.5	19.875	44.625
2018-03-13	03:00:00	13.125	14	13.125	18.5	13.125	21.4375	13.125	20.875	13.125	44.5625	13.125	28.5625
2018-03-13	03:30:00	26.9375	24.5625	26.9375	25.3125	26.9375	39.5625	26.9375	29.8125	26.9375	45.1875	26.9375	40.875
2018-03-13	04:00:00	29.4375	26.375	29.4375	24.75	29.4375	27.9375	29.4375	23.5625	29.4375	48.375	29.4375	42.0625
2018-03-13	04:30:00	23.4375	26.4375	23.4375	28.25	23.4375	18.25	23.4375	26	23.4375	37.1875	23.4375	43.5
2018-03-13	05:00:00	28.375	27.875	28.375	21.1875	28.375	22.75	28.375	30.4375	28.375	35.1875	28.375	40.1875
2018-03-13	05:30:00	22.25	20.625	22.25	14.9375	22.25	27.6875	22.25	35.3125	22.25	52.3125	22.25	40.125
2018-03-13	06:00:00	27.5	18.625	27.5	42.4375	27.5	29.25	27.5	36.75	27.5	42.625	27.5	42.75
2018-03-13	06:30:00	29.8125	23.1875	29.8125	31.625	29.8125	31.125	29.8125	44.125	29.8125	46.375	29.8125	42.5625
2018-03-13	07:00:00	20.25	32.375	20.25	33.25	20.25	32.75	20.25	37.75	20.25	52.1875	20.25	45.125
2018-03-13	07:30:00	34.625	28.5	34.625	40.8125	34.625	27.625	34.625	34.6875	34.625	46.625	34.625	42.875
2018-03-13	08:00:00	30.5	29.8125	30.5	23.0625	30.5	33.875	30.5	32.3125	30.5	40.625	30.5	48
2018-03-13	08:30:00	31.9375	37.125	31.9375	36.8125	31.9375	35.3125	31.9375	43.5625	31.9375	39.4375	31.9375	46.5
2018-03-13	09:00:00	31.8125	37.8125	31.8125	45.0625	31.8125	38.4375	31.8125	38.375	31.8125	30.5625	31.8125	38.875
2018-03-13	09:30:00	35.0625	35.125	35.0625	45.5625	35.0625	36.125	35.0625	40.1875	35.0625	30.625	35.0625	31.3125
2018-03-13	10:00:00	31.375	24.3125	31.375	41.8125	31.375	47.625	31.375	32.875	31.375	17.375	31.375	23.8125
2018-03-13	10:30:00	32.125	34.375	32.125	34.125	32.125	35.3125	32.125	26.6875	32.125	18.3125	32.125	14.5
2018-03-13	11:00:00	29.875	30.6875	29.875	45.0625	29.875	38.0625	29.875	29.625	29.875	4.25	29.875	13.25
2018-03-13	11:30:00	22.8125	19.5	22.8125	44.9375	22.8125	34.375	22.8125	19.625	22.8125	14.6875	22.8125	15.9375
2018-03-13	12:00:00	14.875	20.0625	14.875	53.1875	14.875	40.5625	14.875	19.125	14.875	10.625	14.875	16.0625
2018-03-13	12:30:00	5.9375	15.125	5.9375	44.625	5.9375	40.5625	5.9375	11.8125	5.9375	5.875	5.9375	9.3125
2018-03-13	13:00:00	8.5	6.5	8.5	35.3125	8.5	45.875	8.5	9.6875	8.5	10	8.5	3.1875
2018-03-13	13:30:00	4.6875	8.5	4.6875	40.5625	4.6875	39.8125	4.6875	4.875	4.6875	18.0625	4.6875	7.8125
2018-03-13	14:00:00	2.25	4.5	2.25	29.4375	2.25	34.625	2.25	5.6875	2.25	6.5625	2.25	16.1875
2018-03-13	14:30:00	3.0625	6.375	3.0625	22.375	3.0625	29.8125	3.0625	11.5	3.0625	6.3125	3.0625	14.625
2018-03-13	15:00:00	5	3.625	5	12.75	5	22.25	5	9.125	5	8.5	5	16.125
2018-03-13	15:30:00	3.9375	4.0625	3.9375	9.0625	3.9375	10.1875	3.9375	6	3.9375	8.4375	3.9375	14.0625
2018-03-13	16:00:00	4.5625	2.1875	4.5625	10.125	4.5625	8.0625	4.5625	8.5625	4.5625	8.6875	4.5625	9.8125
2018-03-13	16:30:00	1.5625	2.1875	1.5625	15.5	1.5625	6.6875	1.5625	7.625	1.5625	14.6875	1.5625	5.8125
2018-03-13	17:00:00	11.75	4.75	11.75	5.3125	11.75	5.5625	11.75	0.75	11.75	7.875	11.75	5.125
2018-03-13	17:30:00	4.3125	9.75	4.3125	10.125	4.3125	10.0625	4.3125	4.375	4.3125	4.6875	4.3125	7.1875
2018-03-13	18:00:00	4.5625	9.4375	4.5625	15.125	4.5625	5.875	4.5625	12.375	4.5625	21.1875	4.5625	7.75
2018-03-13	18:30:00	0.1875	11.125	0.1875	9.0625	0.1875	2.8125	0.1875	5.75	0.1875	12.4375	0.1875	4.4375
2018-03-13	19:00:00	7.875	10.3125	7.875	17.375	7.875	14	7.875	11.375	7.875	11.5	7.875	0.4375
2018-03-13	19:30:00	14	18.4375	14	10.3125	14	13.3125	14	8.6875	14	22.125	14	12.25
2018-03-13	20:00:00	9.375	10.9375	9.375	4	9.375	11.1875	9.375	9.25	9.375	24.8125	9.375	22.5
2018-03-13	20:30:00	5.125	2.0625	5.125	1.8125	5.125	3	5.125	7.25	5.125	14.1875	5.125	14.75
2018-03-13	21:00:00	5.125	9.5	5.125	15.75	5.125	14.3125	5.125	15.125	5.125	19.8125	5.125	4.8125
2018-03-13	21:30:00	8.8125	12.75	8.8125	13.8125	8.8125	3	8.8125	13.5	8.8125	17.625	8.8125	15.375
2018-03-13	22:00:00	14.4375	15.125	14.4375	9.25	14.4375	16	14.4375	17.625	14.4375	11.3125	14.4375	14.25
2018-03-13	22:30:00	14.375	8.0625	14.375	14.625	14.375	6.25	14.375	14.1875	14.375	12.3125	14.375	6.75
2018-03-13	23:00:00	23.4375	20.8125	23.4375	14.625	23.4375	9.5625	23.4375	15.625	23.4375	20.5625	23.4375	8
2018-03-13	23:30:00	9.8125	17.75	9.8125	20.5	9.8125	17.5	9.8125	10.6875	9.8125	13.8125	9.8125	16.6875
2018-03-14	00:00:00	7.3125	7.1875	7.3125	16.375	7.3125	15.5625	7.3125	15.375	7.3125	20.3125	7.3125	8.375
2018-03-14	00:30:00	13.6875	11.1875	13.6875	16.0625	13.6875	11.25	13.6875	24.75	13.6875	32.375	13.6875	27.6875
2018-03-14	01:00:00	10.625	6.6875	10.625	19.875	10.625	11.8125	10.625	20.4375	10.625	30.8125	10.625	16.25
2018-03-14	01:30:00	11.4375	8.1875	11.4375	14.3125	11.4375	10.6875	11.4375	13.125	11.4375	15.75	11.4375	12.875
2018-03-14	02:00:00	12.375	11.5	12.375	16.0625	12.375	8.25	12.375	14.875	12.375	20.5	12.375	14.875
2018-03-14	02:30:00	10.9375	17.25	10.9375	29.25	10.9375	8.1875	10.9375	14.4375	10.9375	39.625	10.9375	33
2018-03-14	03:00:00	9.4375	17.3125	9.4375	17.4375	9.4375	24.5	9.4375	15.9375	9.4375	42.875	9.4375	33.125
2018-03-14	03:30:00	18.5	14.3125	18.5	8.9375	18.5	18.375	18.5	33.25	18.5	33	18.5	27.0625
2018-03-14	04:00:00	30.8125	20.4375	30.8125	27.0625	30.8125	20.1875	30.8125	30.75	30.8125	28.1875	30.8125	33.5
2018-03-14	04:30:00	27.3125	19.1875	27.3125	14.25	27.3125	21.375	27.3125	29.0625	27.3125	41.5625	27.3125	33.5
2018-03-14	05:00:00	23.0625	27.3125	23.0625	21.5	23.0625	27.5625	23.0625	30.25	23.0625	46.5625	23.0625	27.875
2018-03-14	05:30:00	23.25	30.3125	23.25	26.375	23.25	23.3125	23.25	25.0625	23.25	45.75	23.25	32.5
2018-03-14	06:00:00	16	22.875	16	33	16	32.375	16	41.3125	16	39.3125	16	36.1875
2018-03-14	06:30:00	26.25	28.6875	26.25	25.875	26.25	25.25	26.25	38.4375	26.25	33.375	26.25	37.875
2018-03-14	07:00:00	29.125	32.1875	29.125	26.6875	29.125	13.25	29.125	30.75	29.125	39.375	29.125	35.75
2018-03-14	07:30:00	35.375	36.625	35.375	23.5625	35.375	16.125	35.375	33.3125	35.375	40.625	35.375	38.1875
2018-03-14	08:00:00	28.375	29.4375	28.375	30.5	28.375	32.3125	28.375	39.6875	28.375	48.8125	28.375	33
2018-03-14	08:30:00	35.8125	27.5625	35.8125	42.625	35.8125	41.5625	35.8125	39.75	35.8125	42.0625	35.8125	31.6875
2018-03-14	09:00:00	22	28	22	40.0625	22	27.0625	22	28.5625	22	37.8125	22	40.8125
2018-03-14	09:30:00	24.3125	27.8125	24.3125	35.5	24.3125	33.125	24.3125	41.125	24.3125	39.1875	24.3125	24.4375
2018-03-14	10:00:00	25.375	32.0625	25.375	33.5	25.375	31.1875	25.375	38.9375	25.375	22.4375	25.375	18
2018-03-14	10:30:00	20.625	23.625	20.625	31.5625	20.625	34.6875	20.625	35	20.625	27.5	20.625	16.625
2018-03-14	11:00:00	22.75	23.75	22.75	41.875	22.75	33.875	22.75	32.5625	22.75	14	22.75	14.125
2018-03-14	11:30:00	23.875	25.25	23.875	40.9375	23.875	40.25	23.875	27.5	23.875	4.875	23.875	11.25
2018-03-14	12:00:00	22.25	15.0625	22.25	43.5	22.25	36.25	22.25	22.4375	22.25	1.75	22.25	4.875
2018-03-14	12:30:00	16.0625	15.75	16.0625	38	16.0625	28.6875	16.0625	22.0625	16.0625	9.5	16.0625	6.6875
2018-03-14	13:00:00	8.4375	16.375	8.4375	47.0625	8.4375	39.3125	8.4375	13.25	8.4375	13.625	8.4375	5.75
2018-03-14	13:30:00	2.125	6.8125	2.125	36.6875	2.125	34.0625	2.125	7.4375	2.125	3.6875	2.125	6.0625
2018-03-14	14:00:00	6.625	7.9375	6.625	32.3125	6.625	36	6.625	9.0625	6.625	1.125	6.625	5.75
2018-03-14	14:30:00	13.5	1.0625	13.5	19.625	13.5	27.8125	13.5	9.4375	13.5	3.0625	13.5	12.625
2018-03-14	15:00:00	6.375	3.1875	6.375	31.5625	6.375	21	6.375	10.1875	6.375	8.0625	6.375	12.4375
2018-03-14	15:30:00	3.875	0.4375	3.875	13.5	3.875	17.3125	3.875	13.4375	3.875	4.5	3.875	2.5625
2018-03-14	16:00:00	5	0.25	5	10.9375	5	13.5	5	10.375	5	7.375	5	8.75
2018-03-14	16:30:00	6.3125	9.5625	6.3125	11.25	6.3125	9.375	6.3125	2.3125	6.3125	7.5	6.3125	7.3125
2018-03-14	17:00:00	2.75	9.5	2.75	13	2.75	6.375	2.75	2.6875	2.75	7.5	2.75	7.9375
2018-03-14	17:30:00	4.8125	2.1875	4.8125	13.5	4.8125	3.5625	4.8125	11.5	4.8125	9.625	4.8125	6.125
2018-03-14	18:00:00	6.8125	2.8125	6.8125	2.9375	6.8125	3.8125	6.8125	6.4375	6.8125	9.3125	6.8125	0.875
2018-03-14	18:30:00	0.0625	2.1875	0.0625	15.5	0.0625	5	0.0625	6.125	0.0625	13.8125	0.0625	3.125
2018-03-14	19:00:00	2.5	4	2.5	13.375	2.5	10.8125	2.5	4.4375	2.5	15.0625	2.5	9.5
2018-03-14	19:30:00	3.75	11.8125	3.75	6.5625	3.75	3.25	3.75	4.5	3.75	13.75	3.75	15.125
2018-03-14	20:00:00	13	7.125	13	8.125	13	8	13	13.75	13	21.0625	13	19.6875
2018-03-14	20:30:00	4.375	3.1875	4.375	8.5625	4.375	6.0625	4.375	12.3125	4.375	13.1875	4.375	16.3125
2018-03-14	21:00:00	5.375	8.9375	5.375	7.8125	5.375	10.625	5.375	8.1875	5.375	6.5	5.375	9.625
2018-03-14	21:30:00	17.125	19.6875	17.125	19.8125	17.125	4.1875	17.125	10.3125	17.125	13.125	17.125	10.8125
2018-03-14	22:00:00	6.375	24.875	6.375	9.375	6.375	2	6.375	11.9375	6.375	14.875	6.375	21.5
2018-03-14	22:30:00	10.375	16.3125	10.375	7.5625	10.375	5.5	10.375	9.6875	10.375	10.3125	10.375	9.375
2018-03-14	23:00:00	5.0625	9.4375	5.0625	14.75	5.0625	5.6875	5.0625	5.125	5.0625	7.5625	5.0625	3.8125
2018-03-14	23:30:00	12.3125	8.9375	12.3125	21.8125	12.3125	12.75	12.3125	18	12.3125	16.4375	12.3125	9.5625
2018-03-15	00:00:00	9.4375	15.0625	9.4375	11.75	9.4375	24.25	9.4375	20.75	9.4375	12.75	9.4375	10.875
2018-03-15	00:30:00	8.625	16.3125	8.625	17.3125	8.625	17.75	8.625	19.3125	8.625	21	8.625	20.5625
2018-03-15	01:00:00	6.1875	9.25	6.1875	12	6.1875	16.6875	6.1875	16.75	6.1875	13.875	6.1875	17.75
2018-03-15	01:30:00	10.875	12.5	10.875	16.9375	10.875	5.4375	10.875	13.25	10.875	25.5625	10.875	14.0625
2018-03-15	02:00:00	3.8125	7.9375	3.8125	17.625	3.8125	13.9375	3.8125	17.625	3.8125	28.4375	3.8125	20.5625
2018-03-15	02:30:00	8.1875	22.6875	8.1875	15	8.1875	13.8125	8.1875	17.75	8.1875	23.75	8.1875	15.8125
2018-03-15	03:00:00	11.4375	20.6875	11.4375	15.4375	11.4375	11.625	11.4375	19.3125	11.4375	31.5	11.4375	23.9375
2018-03-15	03:30:00	15	12.125	15	28.3125	15	23.375	15	20.875	15	32.125	15	22.5
2018-03-15	04:00:00	16.6875	5.9375	16.6875	12	16.6875	24.9375	16.6875	30.9375	16.6875	32.1875	16.6875	25.8125
2018-03-15	04:30:00	13.75	11.9375	13.75	14.8125	13.75	26.125	13.75	31.125	13.75	28.4375	13.75	29.0625
2018-03-15	05:00:00	12.875	36.625	12.875	13.4375	12.875	18.625	12.875	34.75	12.875	36.875	12.875	26.875
2018-03-15	05:30:00	9.3125	28.3125	9.3125	20.125	9.3125	11.875	9.3125	23.4375	9.3125	45.9375	9.3125	30.4375
2018-03-15	06:00:00	30.3125	24.9375	30.3125	20.5	30.3125	25.0625	30.3125	27.25	30.3125	45.1875	30.3125	31.125
2018-03-15	06:30:00	25.5625	25	25.5625	23.1875	25.5625	19.875	25.5625	31.625	25.5625	45.5	25.5625	31.3125
2018-03-15	07:00:00	22.125	19.4375	22.125	29.6875	22.125	16.1875	22.125	28.875	22.125	35.5	22.125	33.5625
2018-03-15	07:30:00	23.125	22.125	23.125	19.1875	23.125	24.9375	23.125	28.5625	23.125	44.75	23.125	30.6875
2018-03-15	08:00:00	22.4375	24.5625	22.4375	33.875	22.4375	31.8125	22.4375	35.3125	22.4375	44.0625	22.4375	36.8125
2018-03-15	08:30:00	25.4375	24.4375	25.4375	30.5	25.4375	15.625	25.4375	29.0625	25.4375	40.1875	25.4375	30.8125
2018-03-15	09:00:00	29	25.375	29	27.875	29	28.0625	29	31.6875	29	31.3125	29	30.6875
2018-03-15	09:30:00	21.8125	25.0625	21.8125	31.5	21.8125	27.5625	21.8125	41	21.8125	28.5	21.8125	30.125
2018-03-15	10:00:00	39.75	31.0625	39.75	33	39.75	31.25	39.75	33.9375	39.75	35.4375	39.75	36.25
2018-03-15	10:30:00	26	25.25	26	33.125	26	34.25	26	35.5	26	19.9375	26	19.9375
2018-03-15	11:00:00	25.625	21.75	25.625	40.125	25.625	37.25	25.625	29.1875	25.625	14.375	25.625	13.875
2018-03-15	11:30:00	16.9375	21.6875	16.9375	33.3125	16.9375	31.4375	16.9375	29.875	16.9375	6.625	16.9375	15.875
2018-03-15	12:00:00	24.125	17.75	24.125	45.0625	24.125	34.375	24.125	21.8125	24.125	7.375	24.125	4.9375
2018-03-15	12:30:00	19.3125	24.4375	19.3125	34.5	19.3125	32.75	19.3125	20.75	19.3125	14.4375	19.3125	5.625
2018-03-15	13:00:00	8.9375	19.0625	8.9375	29.3125	8.9375	31.0625	8.9375	31.0625	8.9375	6.75	8.9375	5.375
2018-03-15	13:30:00	4.4375	6.5	4.4375	24.8125	4.4375	37.3125	4.4375	18.125	4.4375	8.1875	4.4375	10.0625
2018-03-15	14:00:00	7.4375	11.4375	7.4375	34.875	7.4375	33.625	7.4375	12.5	7.4375	11.5625	7.4375	5.375
2018-03-15	14:30:00	4.5	2.5	4.5	21.8125	4.5	31.5	4.5	9.375	4.5	3.5625	4.5	7.0625
2018-03-15	15:00:00	3.8125	6.1875	3.8125	23	3.8125	29.625	3.8125	8.3125	3.8125	1.8125	3.8125	8.25
2018-03-15	15:30:00	3.5	11.75	3.5	16.4375	3.5	19.1875	3.5	12.875	3.5	3.5625	3.5	2.75
2018-03-15	16:00:00	0.875	3.0625	0.875	15.1875	0.875	13.3125	0.875	5.0625	0.875	5.6875	0.875	2.1875
2018-03-15	16:30:00	6.5625	5.25	6.5625	5.5625	6.5625	6.25	6.5625	11.5	6.5625	3.0625	6.5625	5.375
2018-03-15	17:00:00	10	2.8125	10	8.6875	10	8.5	10	7.4375	10	7.9375	10	12.8125
2018-03-15	17:30:00	4.5625	8	4.5625	9.1875	4.5625	7.0625	4.5625	13.6875	4.5625	12.875	4.5625	1
2018-03-15	18:00:00	5.625	6	5.625	12.25	5.625	3.8125	5.625	6.1875	5.625	3.5625	5.625	0.1875
2018-03-15	18:30:00	18	2.9375	18	7.3125	18	8	18	5.3125	18	9.1875	18	3.3125
2018-03-15	19:00:00	10.125	11	10.125	9.0625	10.125	15.3125	10.125	14.4375	10.125	22.75	10.125	17.0625
2018-03-15	19:30:00	3.4375	9.875	3.4375	7.625	3.4375	9.5625	3.4375	13.0625	3.4375	6.875	3.4375	6.125
2018-03-15	20:00:00	6.25	3.75	6.25	8.375	6.25	5.75	6.25	12.125	6.25	21.3125	6.25	3.375
2018-03-15	20:30:00	3.375	9.75	3.375	5.3125	3.375	1.125	3.375	8.125	3.375	15.8125	3.375	6.625
2018-03-15	21:00:00	2.4375	7.5625	2.4375	3.625	2.4375	7.8125	2.4375	12.1875	2.4375	12.0625	2.4375	13.625
2018-03-15	21:30:00	4.1875	11	4.1875	16.3125	4.1875	5.5	4.1875	14.0625	4.1875	12.3125	4.1875	5.625
2018-03-15	22:00:00	7.9375	4.375	7.9375	13.75	7.9375	5.125	7.9375	17.8125	7.9375	16.5	7.9375	16.1875
2018-03-15	22:30:00	7.4375	13.25	7.4375	7.625	7.4375	10.375	7.4375	14.4375	7.4375	5.125	7.4375	11.375
2018-03-15	23:00:00	16.3125	11.4375	16.3125	5.9375	16.3125	17	16.3125	10.8125	16.3125	10	16.3125	16.875
2018-03-15	23:30:00	5.8125	12.3125	5.8125	10.875	5.8125	5.5625	5.8125	13.125	5.8125	11.9375	5.8125	7.8125

## Sheet: RNAi 2
Graphs show behavior in DD
LD: 3-Mar-18 to 9-Mar-18
DD: 10-Mar-18 to 15-Mar-18
PsiRNAiKK/+
	Time	No Light Pulse	ZT13 Pulse	No Light Pulse	ZT15 Pulse	No Light Pulse	ZT17 Pulse	No Light Pulse	ZT19 Pulse	No Light Pulse	ZT21 Pulse	No Light Pulse	ZT23 Pulse
2018-03-03	00:00:00	25.9375	26.25	25.9375	29.875	25.9375	23.75	25.9375	23.4375	25.9375	7.3125	25.9375	21.1875
2018-03-03	00:30:00	7.625	18.875	7.625	16.875	7.625	15.375	7.625	16.25	7.625	5.125	7.625	13.9375
2018-03-03	01:00:00	5.75	10.75	5.75	8.875	5.75	15.125	5.75	8.4375	5.75	3.3125	5.75	6.9375
2018-03-03	01:30:00	5.9375	8.25	5.9375	15.375	5.9375	5.75	5.9375	5.875	5.9375	1.0625	5.9375	6.125
2018-03-03	02:00:00	2.25	3.3125	2.25	3.5	2.25	6.9375	2.25	2.75	2.25	1.1875	2.25	2.9375
2018-03-03	02:30:00	4.3125	6.125	4.3125	6.0625	4.3125	12.9375	4.3125	11.3125	4.3125	0.125	4.3125	6.875
2018-03-03	03:00:00	1.25	3.4375	1.25	0.3125	1.25	7.375	1.25	2	1.25	2.375	1.25	2.625
2018-03-03	03:30:00	7.1875	3.5	7.1875	1.9375	7.1875	6.625	7.1875	1.3125	7.1875	3.875	7.1875	4.625
2018-03-03	04:00:00	5.1875	0.8125	5.1875	5.9375	5.1875	6.3125	5.1875	11.5	5.1875	0.9375	5.1875	7.5625
2018-03-03	04:30:00	7.5	2.6875	7.5	6.6875	7.5	3.625	7.5	15.5625	7.5	3.625	7.5	0.5
2018-03-03	05:00:00	2.4375	2.375	2.4375	6.9375	2.4375	4.375	2.4375	8.125	2.4375	1.5	2.4375	4.9375
2018-03-03	05:30:00	4	8.125	4	16.125	4	3.125	4	8.6875	4	2.8125	4	2.5625
2018-03-03	06:00:00	1.5	3.875	1.5	7.5625	1.5	6.75	1.5	13.1875	1.5	5.625	1.5	2.25
2018-03-03	06:30:00	4.6875	3.9375	4.6875	4.125	4.6875	12.75	4.6875	5.9375	4.6875	1.8125	4.6875	1.8125
2018-03-03	07:00:00	2.5625	3.875	2.5625	6.625	2.5625	11.3125	2.5625	2.3125	2.5625	4	2.5625	6.5625
2018-03-03	07:30:00	8.5625	1.375	8.5625	3.125	8.5625	9.375	8.5625	6.8125	8.5625	4.6875	8.5625	1.625
2018-03-03	08:00:00	3.375	2.75	3.375	0	3.375	4.25	3.375	12.125	3.375	0.125	3.375	8.25
2018-03-03	08:30:00	62.625	56.5625	62.625	35.4375	62.625	58.75	62.625	35.1875	62.625	80.5625	62.625	60.9375
2018-03-03	09:00:00	19.0625	20.375	19.0625	3.8125	19.0625	16.4375	19.0625	7.25	19.0625	43.5625	19.0625	16.5
2018-03-03	09:30:00	2.3125	0.0625	2.3125	1.9375	2.3125	1.375	2.3125	0.75	2.3125	6.625	2.3125	1.5625
2018-03-03	10:00:00	0.375	0	0.375	0	0.375	0	0.375	0.5	0.375	0.5	0.375	0.0625
2018-03-03	10:30:00	0.625	0.5	0.625	0.125	0.625	0.1875	0.625	0.3125	0.625	1.5	0.625	0.1875
2018-03-03	11:00:00	1.1875	0.875	1.1875	0.375	1.1875	0.75	1.1875	0.0625	1.1875	0.8125	1.1875	0.125
2018-03-03	11:30:00	0.125	0	0.125	0.0625	0.125	0.5	0.125	1.25	0.125	0.375	0.125	0
2018-03-03	12:00:00	0.125	0.25	0.125	3.375	0.125	0.625	0.125	2	0.125	0.875	0.125	0.5625
2018-03-03	12:30:00	0.3125	0.0625	0.3125	0	0.3125	0.875	0.3125	3	0.3125	0.4375	0.3125	0.125
2018-03-03	13:00:00	1.9375	0.3125	1.9375	0.5625	1.9375	1.5625	1.9375	1	1.9375	1.8125	1.9375	2.5
2018-03-03	13:30:00	8.1875	2.125	8.1875	2.4375	8.1875	1.9375	8.1875	1.875	8.1875	3.6875	8.1875	4.125
2018-03-03	14:00:00	5.375	4.125	5.375	3.9375	5.375	1.0625	5.375	0.125	5.375	1.8125	5.375	0.25
2018-03-03	14:30:00	6.625	1.3125	6.625	3.3125	6.625	5.1875	6.625	1.125	6.625	5.75	6.625	5.4375
2018-03-03	15:00:00	5	0.125	5	2.6875	5	1.5	5	1.875	5	8	5	2.1875
2018-03-03	15:30:00	9.1875	0.4375	9.1875	4.6875	9.1875	4.1875	9.1875	3.25	9.1875	6.9375	9.1875	5.75
2018-03-03	16:00:00	11.25	6.8125	11.25	7.625	11.25	3.3125	11.25	2.6875	11.25	15	11.25	4.0625
2018-03-03	16:30:00	10.4375	4.8125	10.4375	4.75	10.4375	7.6875	10.4375	3	10.4375	1.1875	10.4375	0.75
2018-03-03	17:00:00	17.875	3.6875	17.875	8.3125	17.875	9.25	17.875	1.1875	17.875	1.6875	17.875	5.75
2018-03-03	17:30:00	12	0.75	12	12.0625	12	20.0625	12	6.0625	12	6.625	12	20.0625
2018-03-03	18:00:00	6.25	2.5625	6.25	10.75	6.25	6.5625	6.25	3.5625	6.25	9.5625	6.25	12.625
2018-03-03	18:30:00	0.5	5.6875	0.5	11.75	0.5	12.875	0.5	4	0.5	4.0625	0.5	7.0625
2018-03-03	19:00:00	4.875	1.25	4.875	10.6875	4.875	10.75	4.875	15.1875	4.875	8.25	4.875	1.8125
2018-03-03	19:30:00	12.6875	5.3125	12.6875	14.9375	12.6875	14.625	12.6875	16.3125	12.6875	8.25	12.6875	3.3125
2018-03-03	20:00:00	15.3125	14.1875	15.3125	8.625	15.3125	2.8125	15.3125	8.25	15.3125	11.6875	15.3125	21.5
2018-03-03	20:30:00	70.5	57.375	70.5	74.75	70.5	55.4375	70.5	71.4375	70.5	36.625	70.5	53
2018-03-03	21:00:00	42.4375	46.375	42.4375	53.1875	42.4375	39.5625	42.4375	47.75	42.4375	16.9375	42.4375	35.9375
2018-03-03	21:30:00	27.9375	31.8125	27.9375	33.0625	27.9375	27	27.9375	26.3125	27.9375	10.125	27.9375	23.75
2018-03-03	22:00:00	17.75	25.0625	17.75	18.1875	17.75	19.875	17.75	15.125	17.75	7.6875	17.75	11.875
2018-03-03	22:30:00	10.6875	12.0625	10.6875	16.0625	10.6875	11.4375	10.6875	9.8125	10.6875	3.0625	10.6875	9.75
2018-03-03	23:00:00	11	13	11	12.125	11	12.625	11	11.5	11	8.375	11	10.1875
2018-03-03	23:30:00	4.6875	10.375	4.6875	9.0625	4.6875	6.3125	4.6875	10.5625	4.6875	0.3125	4.6875	10.6875
2018-03-04	00:00:00	6.25	10.8125	6.25	7.3125	6.25	4.5	6.25	10.8125	6.25	0.125	6.25	2.875
2018-03-04	00:30:00	1.375	6.4375	1.375	8.75	1.375	3	1.375	3.4375	1.375	2.4375	1.375	2.625
2018-03-04	01:00:00	2.4375	8	2.4375	9.25	2.4375	2.3125	2.4375	12.1875	2.4375	1.4375	2.4375	2.9375
2018-03-04	01:30:00	1.9375	9.5	1.9375	11.1875	1.9375	3.75	1.9375	7	1.9375	2	1.9375	6.3125
2018-03-04	02:00:00	4.375	7	4.375	15.3125	4.375	4.25	4.375	4.25	4.375	1.125	4.375	7.5625
2018-03-04	02:30:00	5.1875	6.875	5.1875	23.0625	5.1875	9.625	5.1875	15.9375	5.1875	0.3125	5.1875	10.5
2018-03-04	03:00:00	13.75	13.5625	13.75	22.75	13.75	15.25	13.75	11.6875	13.75	5.5	13.75	14.5
2018-03-04	03:30:00	17.1875	23.75	17.1875	28.75	17.1875	18.9375	17.1875	14.125	17.1875	2.9375	17.1875	18.625
2018-03-04	04:00:00	17.5	28.6875	17.5	57.25	17.5	24.1875	17.5	24.5	17.5	8.625	17.5	37
2018-03-04	04:30:00	35.75	40.125	35.75	55.875	35.75	29.25	35.75	37.0625	35.75	19.3125	35.75	42.9375
2018-03-04	05:00:00	39.5	44.625	39.5	63.9375	39.5	40.125	39.5	51.5	39.5	24.8125	39.5	48.8125
2018-03-04	05:30:00	54.75	56.4375	54.75	62.125	54.75	44.9375	54.75	59.3125	54.75	36.75	54.75	54
2018-03-04	06:00:00	60.25	54.9375	60.25	65.1875	60.25	49.5	60.25	70.5	60.25	44.6875	60.25	59.625
2018-03-04	06:30:00	73.875	60.0625	73.875	69.6875	73.875	61.375	73.875	71.8125	73.875	48.9375	73.875	66.5625
2018-03-04	07:00:00	70.5625	59.125	70.5625	70.125	70.5625	69	70.5625	62.1875	70.5625	55.3125	70.5625	65.0625
2018-03-04	07:30:00	69.6875	63.125	69.6875	62	69.6875	61.1875	69.6875	59.25	69.6875	61.25	69.6875	67
2018-03-04	08:00:00	66.9375	56.25	66.9375	52.4375	66.9375	59.9375	66.9375	64.6875	66.9375	57.125	66.9375	58
2018-03-04	08:30:00	74.0625	69.5625	74.0625	57	74.0625	71.1875	74.0625	64.6875	74.0625	86.8125	74.0625	63.125
2018-03-04	09:00:00	0.125	2.625	0.125	0.1875	0.125	2.75	0.125	0.1875	0.125	2.9375	0.125	0.25
2018-03-04	09:30:00	1.125	0.0625	1.125	0.5625	1.125	0.0625	1.125	0.4375	1.125	0.125	1.125	0.0625
2018-03-04	10:00:00	0.8125	0.4375	0.8125	0.75	0.8125	0.125	0.8125	0.3125	0.8125	0.3125	0.8125	0.6875
2018-03-04	10:30:00	0.125	0.125	0.125	0.1875	0.125	0.1875	0.125	1.125	0.125	0.1875	0.125	0.5
2018-03-04	11:00:00	0.625	0.0625	0.625	0.1875	0.625	0.3125	0.625	0.0625	0.625	0.25	0.625	1
2018-03-04	11:30:00	2.8125	0.1875	2.8125	0.0625	2.8125	0.5625	2.8125	0	2.8125	1.375	2.8125	1.1875
2018-03-04	12:00:00	0	0.5	0	2	0	0.875	0	0	0	0.5	0	0.625
2018-03-04	12:30:00	0.4375	0.0625	0.4375	0.0625	0.4375	0.0625	0.4375	0.25	0.4375	2.5	0.4375	1.25
2018-03-04	13:00:00	0.4375	0.0625	0.4375	0.5625	0.4375	0.125	0.4375	0	0.4375	0.25	0.4375	0.9375
2018-03-04	13:30:00	1.875	0.0625	1.875	0.5625	1.875	0.125	1.875	0	1.875	0.3125	1.875	0.8125
2018-03-04	14:00:00	1.125	0.3125	1.125	0.3125	1.125	2.4375	1.125	0	1.125	0.25	1.125	2.3125
2018-03-04	14:30:00	0.3125	0	0.3125	0.6875	0.3125	2.4375	0.3125	0.625	0.3125	1.3125	0.3125	1.3125
2018-03-04	15:00:00	2.1875	1.9375	2.1875	1.375	2.1875	2.5625	2.1875	1.1875	2.1875	0.9375	2.1875	0.3125
2018-03-04	15:30:00	0.375	1.8125	0.375	1.0625	0.375	0.1875	0.375	0.25	0.375	1.4375	0.375	1.6875
2018-03-04	16:00:00	2.9375	0.125	2.9375	2.9375	2.9375	3.0625	2.9375	0.5	2.9375	3.5625	2.9375	2.0625
2018-03-04	16:30:00	2.375	1.5	2.375	2.6875	2.375	2.125	2.375	0.125	2.375	0.9375	2.375	4.125
2018-03-04	17:00:00	3	2.375	3	1.5	3	6.0625	3	1.25	3	0.125	3	2.9375
2018-03-04	17:30:00	4.3125	1.625	4.3125	4.625	4.3125	1.0625	4.3125	0.3125	4.3125	1.8125	4.3125	0.9375
2018-03-04	18:00:00	8.3125	4.75	8.3125	6.0625	8.3125	2.375	8.3125	1.75	8.3125	1.5625	8.3125	1.1875
2018-03-04	18:30:00	5.4375	13.1875	5.4375	10.9375	5.4375	8.0625	5.4375	7	5.4375	3.5625	5.4375	9.75
2018-03-04	19:00:00	15.0625	5.6875	15.0625	8.4375	15.0625	7.1875	15.0625	6.125	15.0625	10.0625	15.0625	17.4375
2018-03-04	19:30:00	28.3125	14.4375	28.3125	8.875	28.3125	13	28.3125	4.625	28.3125	31.0625	28.3125	5.125
2018-03-04	20:00:00	27.5	14.125	27.5	25	27.5	28.75	27.5	12.875	27.5	15.8125	27.5	14.75
2018-03-04	20:30:00	83.25	68.0625	83.25	79.5625	83.25	72.3125	83.25	75.625	83.25	58.875	83.25	71.25
2018-03-04	21:00:00	45.6875	35.75	45.6875	37.0625	45.6875	32.5625	45.6875	37	45.6875	20.5625	45.6875	28.625
2018-03-04	21:30:00	21	19.5625	21	23.3125	21	20	21	20.125	21	12.125	21	11.5625
2018-03-04	22:00:00	9.5	12	9.5	8.5625	9.5	4.8125	9.5	15.4375	9.5	0.75	9.5	2.4375
2018-03-04	22:30:00	4.625	5.9375	4.625	5.0625	4.625	2.3125	4.625	4.125	4.625	0.125	4.625	0.5625
2018-03-04	23:00:00	3.125	2.0625	3.125	9.4375	3.125	4.4375	3.125	3.875	3.125	0	3.125	1.0625
2018-03-04	23:30:00	0.5	1.25	0.5	3.375	0.5	2.75	0.5	3.3125	0.5	0.1875	0.5	0.1875
2018-03-05	00:00:00	1.375	0.6875	1.375	1.75	1.375	0.5	1.375	0.3125	1.375	0	1.375	0
2018-03-05	00:30:00	1.9375	0.125	1.9375	3.625	1.9375	1.8125	1.9375	3.25	1.9375	0	1.9375	0.125
2018-03-05	01:00:00	1.625	0.0625	1.625	2.4375	1.625	6.75	1.625	1.0625	1.625	0	1.625	0.3125
2018-03-05	01:30:00	0	0.6875	0	3.1875	0	1.8125	0	0.5625	0	0	0	0.125
2018-03-05	02:00:00	0.375	0.8125	0.375	6.4375	0.375	4.0625	0.375	0.125	0.375	0	0.375	0.125
2018-03-05	02:30:00	0.375	1.375	0.375	6.375	0.375	4.5625	0.375	3.625	0.375	0	0.375	0.9375
2018-03-05	03:00:00	0	1	0	2.4375	0	0.4375	0	3.3125	0	0	0	0.5
2018-03-05	03:30:00	0	2.875	0	5.4375	0	1.375	0	7.6875	0	0.0625	0	0.625
2018-03-05	04:00:00	1.6875	4.5	1.6875	6.625	1.6875	4.9375	1.6875	3.4375	1.6875	0	1.6875	0.8125
2018-03-05	04:30:00	7.3125	13.3125	7.3125	13.875	7.3125	2.4375	7.3125	9.0625	7.3125	2.8125	7.3125	9.8125
2018-03-05	05:00:00	10.625	11.875	10.625	24.6875	10.625	10.4375	10.625	2.6875	10.625	4.1875	10.625	16.9375
2018-03-05	05:30:00	9.875	21.625	9.875	36.0625	9.875	18.875	9.875	12.5625	9.875	8.125	9.875	21.8125
2018-03-05	06:00:00	19.5	35	19.5	45.4375	19.5	30.3125	19.5	32.5625	19.5	10.375	19.5	35.6875
2018-03-05	06:30:00	33.25	50.25	33.25	53.4375	33.25	29.375	33.25	53.875	33.25	18.875	33.25	47.4375
2018-03-05	07:00:00	50.6875	62.5625	50.6875	75.1875	50.6875	50.3125	50.6875	78.875	50.6875	36.625	50.6875	56.75
2018-03-05	07:30:00	64.5	71.625	64.5	71.75	64.5	61.3125	64.5	78	64.5	51.625	64.5	64.3125
2018-03-05	08:00:00	71.375	75.5	71.375	81.75	71.375	71.1875	71.375	86.3125	71.375	58.9375	71.375	72.125
2018-03-05	08:30:00	90.4375	76.125	90.4375	74.625	90.4375	81.875	90.4375	72.8125	90.4375	98.6875	90.4375	69.875
2018-03-05	09:00:00	7.625	5.875	7.625	5.5	7.625	8.4375	7.625	0.3125	7.625	18.5	7.625	1.8125
2018-03-05	09:30:00	0.125	0.875	0.125	0.25	0.125	0.5	0.125	0.25	0.125	0.3125	0.125	0.0625
2018-03-05	10:00:00	0.75	0.5625	0.75	0.1875	0.75	0.6875	0.75	0.75	0.75	0.5	0.75	0.875
2018-03-05	10:30:00	0.25	0.25	0.25	0.875	0.25	0.625	0.25	0.0625	0.25	0.1875	0.25	0.25
2018-03-05	11:00:00	0.0625	0.9375	0.0625	0	0.0625	0.375	0.0625	0.375	0.0625	1.125	0.0625	0.3125
2018-03-05	11:30:00	0	1.75	0	0	0	0.6875	0	0.1875	0	0.6875	0	0.4375
2018-03-05	12:00:00	0.75	2.6875	0.75	0.375	0.75	0.8125	0.75	0.125	0.75	0.5	0.75	0.5625
2018-03-05	12:30:00	0.5625	0.1875	0.5625	0	0.5625	0.125	0.5625	0	0.5625	1.875	0.5625	0.875
2018-03-05	13:00:00	2.8125	0.3125	2.8125	0	2.8125	0.1875	2.8125	0.625	2.8125	0.125	2.8125	0
2018-03-05	13:30:00	3.5	0.5	3.5	0.3125	3.5	0.5625	3.5	0.5	3.5	0.0625	3.5	0.5625
2018-03-05	14:00:00	3.5	1.5625	3.5	2.9375	3.5	1.5	3.5	1.5625	3.5	0.0625	3.5	0.8125
2018-03-05	14:30:00	0.8125	2.6875	0.8125	2.4375	0.8125	1.6875	0.8125	2.125	0.8125	0	0.8125	0.875
2018-03-05	15:00:00	0.1875	1.375	0.1875	1.6875	0.1875	2.125	0.1875	0.625	0.1875	0.125	0.1875	0.5
2018-03-05	15:30:00	1.6875	1.125	1.6875	2.875	1.6875	2.25	1.6875	0.5	1.6875	0.5625	1.6875	2.6875
2018-03-05	16:00:00	5	0.4375	5	1.3125	5	0.125	5	0.9375	5	2.1875	5	0.9375
2018-03-05	16:30:00	1.75	0.5	1.75	2.125	1.75	3.6875	1.75	1.0625	1.75	2.5	1.75	1.5625
2018-03-05	17:00:00	5.4375	1.8125	5.4375	0.8125	5.4375	7.5	5.4375	0.8125	5.4375	1	5.4375	0.1875
2018-03-05	17:30:00	9.1875	1.625	9.1875	0	9.1875	3.3125	9.1875	0	9.1875	4.875	9.1875	0.5625
2018-03-05	18:00:00	15.75	2.375	15.75	5.25	15.75	5	15.75	0.4375	15.75	0.6875	15.75	2.1875
2018-03-05	18:30:00	6.625	2.625	6.625	3.8125	6.625	6.8125	6.625	3.625	6.625	1.5625	6.625	5.0625
2018-03-05	19:00:00	13.5625	7.3125	13.5625	10.9375	13.5625	13.6875	13.5625	13.25	13.5625	15.125	13.5625	9.9375
2018-03-05	19:30:00	37.375	6.125	37.375	16.125	37.375	21.1875	37.375	7.25	37.375	19.1875	37.375	18.125
2018-03-05	20:00:00	33.3125	19.625	33.3125	12	33.3125	26.1875	33.3125	11.5	33.3125	14.8125	33.3125	34.4375
2018-03-05	20:30:00	86.25	72.0625	86.25	84.1875	86.25	72.1875	86.25	83.3125	86.25	68.25	86.25	64.875
2018-03-05	21:00:00	52.375	40.125	52.375	40.75	52.375	41.875	52.375	48.75	52.375	22.8125	52.375	42.1875
2018-03-05	21:30:00	24.4375	22	24.4375	19.3125	24.4375	20.125	24.4375	21	24.4375	6.625	24.4375	15.375
2018-03-05	22:00:00	7.6875	10.875	7.6875	7.8125	7.6875	9.6875	7.6875	16.5	7.6875	3	7.6875	2.8125
2018-03-05	22:30:00	3.625	5.4375	3.625	8.5	3.625	1.875	3.625	9.375	3.625	1.125	3.625	0.4375
2018-03-05	23:00:00	0.8125	1.0625	0.8125	1.875	0.8125	5.0625	0.8125	2.9375	0.8125	2.4375	0.8125	0.125
2018-03-05	23:30:00	2.0625	0.625	2.0625	1.1875	2.0625	0.375	2.0625	2.9375	2.0625	2.0625	2.0625	1.9375
2018-03-06	00:00:00	1.6875	2	1.6875	0.3125	1.6875	0.1875	1.6875	11.625	1.6875	1.25	1.6875	0.5625
2018-03-06	00:30:00	0.5625	4.125	0.5625	0.3125	0.5625	1.0625	0.5625	5.6875	0.5625	0.9375	0.5625	0.125
2018-03-06	01:00:00	0.0625	5	0.0625	0.25	0.0625	0.4375	0.0625	5.5	0.0625	0	0.0625	0.125
2018-03-06	01:30:00	0	0.5625	0	2.3125	0	1.25	0	3.6875	0	0	0	0
2018-03-06	02:00:00	0.5625	2.0625	0.5625	1.5625	0.5625	0.375	0.5625	2.4375	0.5625	0	0.5625	1.4375
2018-03-06	02:30:00	0.125	0	0.125	0.875	0.125	0	0.125	2.25	0.125	0	0.125	6.875
2018-03-06	03:00:00	0.875	0.8125	0.875	10.25	0.875	1.625	0.875	6.125	0.875	0	0.875	0.75
2018-03-06	03:30:00	0.25	0.75	0.25	6	0.25	1.25	0.25	6.25	0.25	0	0.25	4.0625
2018-03-06	04:00:00	1.5625	1.5625	1.5625	4.0625	1.5625	4.625	1.5625	9.25	1.5625	0.5	1.5625	3.0625
2018-03-06	04:30:00	6.0625	8.5625	6.0625	7.5625	6.0625	4.5625	6.0625	8.0625	6.0625	1.125	6.0625	7.3125
2018-03-06	05:00:00	9.125	12.75	9.125	16.875	9.125	4.75	9.125	9.5625	9.125	1.4375	9.125	16.9375
2018-03-06	05:30:00	13.0625	16	13.0625	16.75	13.0625	11.3125	13.0625	17.25	13.0625	2.8125	13.0625	19.25
2018-03-06	06:00:00	9.875	20.375	9.875	32.0625	9.875	17.625	9.875	22.75	9.875	10.5	9.875	29.6875
2018-03-06	06:30:00	21.1875	38	21.1875	38.3125	21.1875	27.9375	21.1875	36.75	21.1875	12.5	21.1875	43.0625
2018-03-06	07:00:00	35.375	48.625	35.375	51.75	35.375	36.875	35.375	61.5	35.375	29	35.375	46.8125
2018-03-06	07:30:00	52.75	64.25	52.75	64.5	52.75	55.3125	52.75	66.25	52.75	48.125	52.75	56.9375
2018-03-06	08:00:00	67.8125	70.5	67.8125	78.875	67.8125	62.125	67.8125	78.25	67.8125	62.375	67.8125	58.875
2018-03-06	08:30:00	85.6875	66.4375	85.6875	67.6875	85.6875	75.8125	85.6875	69.375	85.6875	94.6875	85.6875	61.0625
2018-03-06	09:00:00	8.5625	2.25	8.5625	5.375	8.5625	11	8.5625	5.5	8.5625	17.5	8.5625	4.75
2018-03-06	09:30:00	0.1875	1.8125	0.1875	0.1875	0.1875	0.4375	0.1875	1.8125	0.1875	1.6875	0.1875	0.125
2018-03-06	10:00:00	0.5	0.375	0.5	0.0625	0.5	0.125	0.5	0.9375	0.5	0.125	0.5	0.1875
2018-03-06	10:30:00	0	1.5	0	0.125	0	0.375	0	1.4375	0	0.0625	0	1.25
2018-03-06	11:00:00	0.25	0.125	0.25	0.3125	0.25	0.0625	0.25	0.25	0.25	0	0.25	0.0625
2018-03-06	11:30:00	0	0	0	0.0625	0	0.1875	0	2.375	0	0.75	0	0
2018-03-06	12:00:00	0.375	0.25	0.375	0	0.375	1.4375	0.375	2	0.375	1.1875	0.375	0.0625
2018-03-06	12:30:00	0.875	0.375	0.875	0.875	0.875	1.125	0.875	2.875	0.875	1.875	0.875	0.375
2018-03-06	13:00:00	1.625	0.5625	1.625	1.9375	1.625	0.0625	1.625	2.625	1.625	0.1875	1.625	1.9375
2018-03-06	13:30:00	2.625	1.75	2.625	1.9375	2.625	3.25	2.625	0.375	2.625	0.8125	2.625	0.4375
2018-03-06	14:00:00	1.125	1.5	1.125	1	1.125	0.1875	1.125	1.125	1.125	0.625	1.125	2.625
2018-03-06	14:30:00	3.4375	0.0625	3.4375	0.0625	3.4375	0.25	3.4375	0.9375	3.4375	0.125	3.4375	1.6875
2018-03-06	15:00:00	2.125	0.0625	2.125	1.25	2.125	0	2.125	5.25	2.125	2.25	2.125	0.5
2018-03-06	15:30:00	0.375	5.9375	0.375	1.375	0.375	0.0625	0.375	4.375	0.375	0.5625	0.375	0.25
2018-03-06	16:00:00	1.8125	0.875	1.8125	0.6875	1.8125	0.5	1.8125	0.6875	1.8125	0.1875	1.8125	0.5625
2018-03-06	16:30:00	2.0625	2.875	2.0625	1.9375	2.0625	0.4375	2.0625	3.5	2.0625	0.8125	2.0625	1.6875
2018-03-06	17:00:00	8.875	2.6875	8.875	1.6875	8.875	0.75	8.875	2.1875	8.875	0.5	8.875	0
2018-03-06	17:30:00	1.3125	4.375	1.3125	2.0625	1.3125	1.3125	1.3125	4.125	1.3125	1.875	1.3125	5.375
2018-03-06	18:00:00	3.625	2.5	3.625	2.75	3.625	1.375	3.625	3	3.625	2	3.625	3.5
2018-03-06	18:30:00	6.25	5.9375	6.25	3.125	6.25	1.4375	6.25	6.3125	6.25	2.25	6.25	3.375
2018-03-06	19:00:00	7.1875	7.75	7.1875	2.625	7.1875	6.3125	7.1875	2.4375	7.1875	7.5	7.1875	5.9375
2018-03-06	19:30:00	25.25	11.8125	25.25	18.625	25.25	16.875	25.25	6.1875	25.25	7.75	25.25	20.375
2018-03-06	20:00:00	35.5	12	35.5	17.25	35.5	19.5625	35.5	19.1875	35.5	22.5	35.5	32.625
2018-03-06	20:30:00	87.75	73	87.75	85.8125	87.75	72.625	87.75	91.0625	87.75	73	87.75	68.8125
2018-03-06	21:00:00	44.875	42.125	44.875	39.5625	44.875	37.4375	44.875	47.3125	44.875	25.375	44.875	40.625
2018-03-06	21:30:00	21	22.4375	21	19.5625	21	9.0625	21	21.5	21	5.9375	21	13.625
2018-03-06	22:00:00	5.4375	6.6875	5.4375	7.8125	5.4375	5.3125	5.4375	12.8125	5.4375	0.1875	5.4375	7.6875
2018-03-06	22:30:00	1.625	2.75	1.625	4	1.625	7	1.625	4.1875	1.625	0.4375	1.625	0.875
2018-03-06	23:00:00	0.375	0.625	0.375	0.375	0.375	2.3125	0.375	2.875	0.375	0	0.375	0
2018-03-06	23:30:00	2.75	0.875	2.75	0.625	2.75	0.875	2.75	3.1875	2.75	0.625	2.75	1
2018-03-07	00:00:00	0.0625	0.125	0.0625	2.875	0.0625	1.4375	0.0625	1.375	0.0625	0	0.0625	0
2018-03-07	00:30:00	0.25	2.375	0.25	0.0625	0.25	4.4375	0.25	2.5	0.25	0.0625	0.25	0
2018-03-07	01:00:00	0.0625	0	0.0625	0.9375	0.0625	0.4375	0.0625	0.75	0.0625	0.1875	0.0625	0
2018-03-07	01:30:00	0	0	0	1.25	0	3.3125	0	1.1875	0	0	0	0
2018-03-07	02:00:00	0.375	0.0625	0.375	1.875	0.375	5.75	0.375	1.25	0.375	0	0.375	0
2018-03-07	02:30:00	0.25	0.375	0.25	5.0625	0.25	1.3125	0.25	7.3125	0.25	0	0.25	0.0625
2018-03-07	03:00:00	0.5625	0.0625	0.5625	2.625	0.5625	1.5625	0.5625	5.4375	0.5625	0	0.5625	0.1875
2018-03-07	03:30:00	0	0.875	0	0.1875	0	0.6875	0	1.875	0	0.1875	0	1.8125
2018-03-07	04:00:00	2.5	3.0625	2.5	1.75	2.5	7.375	2.5	13.1875	2.5	2.9375	2.5	1.875
2018-03-07	04:30:00	5.3125	5.5625	5.3125	10.375	5.3125	4.9375	5.3125	12	5.3125	3.75	5.3125	14.125
2018-03-07	05:00:00	6.0625	10.4375	6.0625	13.5625	6.0625	12.625	6.0625	14.375	6.0625	2.0625	6.0625	11.875
2018-03-07	05:30:00	8.125	12.0625	8.125	26.3125	8.125	11.5	8.125	21.625	8.125	6.4375	8.125	18.125
2018-03-07	06:00:00	12.4375	23.1875	12.4375	27.125	12.4375	17.75	12.4375	34.5	12.4375	5.9375	12.4375	29.1875
2018-03-07	06:30:00	21.75	40	21.75	45.375	21.75	29.125	21.75	47.5	21.75	16.9375	21.75	39.5625
2018-03-07	07:00:00	36.4375	53	36.4375	68.25	36.4375	41.875	36.4375	62.875	36.4375	34.375	36.4375	50.75
2018-03-07	07:30:00	54.25	66.375	54.25	69.0625	54.25	49.9375	54.25	67.4375	54.25	49.8125	54.25	55.625
2018-03-07	08:00:00	63.9375	71.1875	63.9375	78.8125	63.9375	60.3125	63.9375	84.5	63.9375	59.25	63.9375	61.875
2018-03-07	08:30:00	77.625	56.125	77.625	66.3125	77.625	66.3125	77.625	72.3125	77.625	87	77.625	56.5625
2018-03-07	09:00:00	4.625	0.1875	4.625	6.625	4.625	9.6875	4.625	0.875	4.625	10.5	4.625	2.9375
2018-03-07	09:30:00	0.125	0.1875	0.125	1.75	0.125	0.875	0.125	0.375	0.125	0.25	0.125	1.25
2018-03-07	10:00:00	0	0.125	0	2.5625	0	0.5625	0	1	0	0.125	0	2
2018-03-07	10:30:00	0.125	0	0.125	1.4375	0.125	0.25	0.125	0.125	0.125	0	0.125	1.5
2018-03-07	11:00:00	3.75	0.0625	3.75	1.5	3.75	0.0625	3.75	0.0625	3.75	0.5	3.75	1.8125
2018-03-07	11:30:00	2.5625	0.5	2.5625	0.0625	2.5625	1.6875	2.5625	2.625	2.5625	0.1875	2.5625	1.375
2018-03-07	12:00:00	0	0.3125	0	1.625	0	0.1875	0	0.6875	0	0.625	0	0.375
2018-03-07	12:30:00	0.125	0.4375	0.125	2.4375	0.125	0.125	0.125	0.5	0.125	0	0.125	0.75
2018-03-07	13:00:00	2.625	1.9375	2.625	0	2.625	0	2.625	0.4375	2.625	0.625	2.625	1
2018-03-07	13:30:00	0.3125	1	0.3125	0.5	0.3125	0.4375	0.3125	0.75	0.3125	0.875	0.3125	4.0625
2018-03-07	14:00:00	0.5625	0.375	0.5625	1.0625	0.5625	0.6875	0.5625	0.6875	0.5625	0.0625	0.5625	0.0625
2018-03-07	14:30:00	0.125	0.875	0.125	0.5625	0.125	0.0625	0.125	2.125	0.125	0.0625	0.125	0.1875
2018-03-07	15:00:00	1.6875	0.1875	1.6875	4.0625	1.6875	1.0625	1.6875	0.625	1.6875	0.0625	1.6875	0.125
2018-03-07	15:30:00	0.1875	0.3125	0.1875	2.125	0.1875	0.875	0.1875	2.875	0.1875	0	0.1875	0.4375
2018-03-07	16:00:00	0.125	1.375	0.125	0.0625	0.125	2.1875	0.125	0.75	0.125	0.5625	0.125	1.25
2018-03-07	16:30:00	2	0.5	2	5.1875	2	0.5	2	1.9375	2	0.1875	2	0.125
2018-03-07	17:00:00	3.625	4	3.625	2	3.625	1.3125	3.625	4.375	3.625	0.5	3.625	0.8125
2018-03-07	17:30:00	4.4375	2.5	4.4375	1.9375	4.4375	3.4375	4.4375	2.625	4.4375	1.8125	4.4375	6.625
2018-03-07	18:00:00	14	1.5625	14	1.1875	14	11.25	14	3.4375	14	2.75	14	5.125
2018-03-07	18:30:00	7.875	4.3125	7.875	2.625	7.875	7.6875	7.875	2.6875	7.875	0.875	7.875	4.375
2018-03-07	19:00:00	17.125	0.4375	17.125	3	17.125	5.3125	17.125	3.0625	17.125	0.125	17.125	7.1875
2018-03-07	19:30:00	14.9375	1.4375	14.9375	4.6875	14.9375	24.3125	14.9375	13.5625	14.9375	7.5625	14.9375	4.4375
2018-03-07	20:00:00	29.6875	12.25	29.6875	11.75	29.6875	25.5	29.6875	18.25	29.6875	13.4375	29.6875	12.625
2018-03-07	20:30:00	79.875	70.9375	79.875	76.625	79.875	74.4375	79.875	83.5	79.875	69.875	79.875	66.6875
2018-03-07	21:00:00	42	48.9375	42	49.625	42	36.1875	42	37.9375	42	23.875	42	28.6875
2018-03-07	21:30:00	16.4375	21.5	16.4375	19	16.4375	9.1875	16.4375	19.625	16.4375	2.75	16.4375	11.625
2018-03-07	22:00:00	5.5	7.625	5.5	4.5	5.5	4.9375	5.5	2.4375	5.5	0.375	5.5	0.9375
2018-03-07	22:30:00	1.75	5.5	1.75	3.1875	1.75	5	1.75	1.5	1.75	0.0625	1.75	0.4375
2018-03-07	23:00:00	0.3125	3.1875	0.3125	0.375	0.3125	1.125	0.3125	0.0625	0.3125	0.25	0.3125	0
2018-03-07	23:30:00	2.9375	0.75	2.9375	1.6875	2.9375	0.0625	2.9375	1	2.9375	0	2.9375	0
2018-03-08	00:00:00	0.1875	0.1875	0.1875	0.375	0.1875	2	0.1875	0.8125	0.1875	0	0.1875	0
2018-03-08	00:30:00	1.125	0.375	1.125	0.9375	1.125	0	1.125	0	1.125	3	1.125	0
2018-03-08	01:00:00	0	0.25	0	0.875	0	1.1875	0	0.25	0	0	0	0.375
2018-03-08	01:30:00	0.0625	0.375	0.0625	3.5625	0.0625	1.5625	0.0625	0.625	0.0625	0	0.0625	0
2018-03-08	02:00:00	0.625	1.6875	0.625	0.25	0.625	0.9375	0.625	0.0625	0.625	0	0.625	0.0625
2018-03-08	02:30:00	0	0.125	0	1.3125	0	0.4375	0	1.4375	0	0	0	0
2018-03-08	03:00:00	0.375	4.125	0.375	2.0625	0.375	0.25	0.375	0.25	0.375	0	0.375	0.25
2018-03-08	03:30:00	0.125	2.25	0.125	6.1875	0.125	3.125	0.125	0.5625	0.125	0	0.125	0.25
2018-03-08	04:00:00	1.5	1.375	1.5	8.5625	1.5	3	1.5	2.25	1.5	0.5625	1.5	4.125
2018-03-08	04:30:00	3.0625	3.6875	3.0625	10.875	3.0625	4.3125	3.0625	11.625	3.0625	2.0625	3.0625	9.3125
2018-03-08	05:00:00	5.5	10	5.5	16.375	5.5	12.4375	5.5	7.0625	5.5	2.5625	5.5	16.375
2018-03-08	05:30:00	12	24.375	12	21.75	12	14.4375	12	18.3125	12	3.75	12	25.8125
2018-03-08	06:00:00	15.625	31.375	15.625	25.9375	15.625	22.625	15.625	38.6875	15.625	8.1875	15.625	35.1875
2018-03-08	06:30:00	27.375	42	27.375	43.5	27.375	28.375	27.375	49.3125	27.375	18.625	27.375	41.8125
2018-03-08	07:00:00	43.3125	54.0625	43.3125	59.625	43.3125	41.25	43.3125	58.5625	43.3125	33.375	43.3125	53.0625
2018-03-08	07:30:00	60.8125	67.1875	60.8125	62.8125	60.8125	56.8125	60.8125	77.6875	60.8125	55.875	60.8125	56.1875
2018-03-08	08:00:00	69.9375	69.375	69.9375	71.875	69.9375	70.125	69.9375	75.625	69.9375	66.25	69.9375	67.4375
2018-03-08	08:30:00	71.5625	50.6875	71.5625	60.75	71.5625	63.875	71.5625	60.6875	71.5625	74.4375	71.5625	60.3125
2018-03-08	09:00:00	1.5	0.875	1.5	1.25	1.5	3.1875	1.5	2.0625	1.5	5.625	1.5	0.875
2018-03-08	09:30:00	1.6875	0.0625	1.6875	0.0625	1.6875	0.125	1.6875	1.9375	1.6875	0.375	1.6875	1.1875
2018-03-08	10:00:00	1.3125	0	1.3125	0	1.3125	0	1.3125	1.375	1.3125	0.5	1.3125	0.75
2018-03-08	10:30:00	1.375	0	1.375	0	1.375	0	1.375	0.125	1.375	0.0625	1.375	3.0625
2018-03-08	11:00:00	0.125	0	0.125	0	0.125	0.3125	0.125	0.5625	0.125	0.125	0.125	2.5
2018-03-08	11:30:00	1.5	0	1.5	0.0625	1.5	0.25	1.5	0	1.5	0.6875	1.5	4.625
2018-03-08	12:00:00	3.75	0.75	3.75	0.3125	3.75	0.25	3.75	0.5	3.75	0.25	3.75	2.875
2018-03-08	12:30:00	0.75	0.25	0.75	2.9375	0.75	0	0.75	0.4375	0.75	0.25	0.75	0.4375
2018-03-08	13:00:00	0.25	0.125	0.25	0.125	0.25	1.75	0.25	0	0.25	0.1875	0.25	0.375
2018-03-08	13:30:00	0	0.6875	0	1.25	0	0.4375	0	0.75	0	0.375	0	0.625
2018-03-08	14:00:00	2.25	0.4375	2.25	0.0625	2.25	0.3125	2.25	0.125	2.25	0.6875	2.25	5.625
2018-03-08	14:30:00	0.1875	2.0625	0.1875	0.9375	0.1875	0.9375	0.1875	1	0.1875	0.6875	0.1875	1.375
2018-03-08	15:00:00	0.375	0.875	0.375	1.125	0.375	0.0625	0.375	0.875	0.375	0.6875	0.375	3.3125
2018-03-08	15:30:00	0.0625	0.3125	0.0625	0.3125	0.0625	4.5625	0.0625	0.5	0.0625	0.0625	0.0625	3.1875
2018-03-08	16:00:00	0.4375	2.5625	0.4375	3.1875	0.4375	0.375	0.4375	3.4375	0.4375	0.3125	0.4375	0.8125
2018-03-08	16:30:00	1.25	2.0625	1.25	0.1875	1.25	0.375	1.25	0.9375	1.25	0.375	1.25	1.375
2018-03-08	17:00:00	0.375	0.125	0.375	2.8125	0.375	1.5625	0.375	4	0.375	0	0.375	0.6875
2018-03-08	17:30:00	0	5.4375	0	0.9375	0	2.375	0	1.9375	0	1.25	0	0.875
2018-03-08	18:00:00	0.8125	2	0.8125	1.0625	0.8125	3.8125	0.8125	4.6875	0.8125	0	0.8125	0.875
2018-03-08	18:30:00	2.3125	1.9375	2.3125	1.3125	2.3125	8.9375	2.3125	3.5625	2.3125	1.1875	2.3125	4.0625
2018-03-08	19:00:00	10.5625	1.125	10.5625	2.5625	10.5625	4.3125	10.5625	3.3125	10.5625	4.8125	10.5625	3.8125
2018-03-08	19:30:00	8.125	2.125	8.125	9.4375	8.125	13.4375	8.125	5.5625	8.125	7.4375	8.125	1.125
2018-03-08	20:00:00	16.3125	12.5625	16.3125	20.75	16.3125	20.375	16.3125	12.5625	16.3125	1.9375	16.3125	9.75
2018-03-08	20:30:00	77.625	72.5625	77.625	79.25	77.625	65.9375	77.625	81.75	77.625	74.4375	77.625	61.75
2018-03-08	21:00:00	39.125	38.75	39.125	43	39.125	25.625	39.125	31.5625	39.125	28.875	39.125	25
2018-03-08	21:30:00	9.875	15.8125	9.875	12.125	9.875	9.4375	9.875	5.875	9.875	4.625	9.875	4.4375
2018-03-08	22:00:00	3.125	7.125	3.125	3.4375	3.125	2.375	3.125	1.9375	3.125	0.1875	3.125	1
2018-03-08	22:30:00	2.125	2	2.125	2.1875	2.125	0.9375	2.125	2.1875	2.125	0.125	2.125	0.0625
2018-03-08	23:00:00	0.1875	2.375	0.1875	0	0.1875	0	0.1875	1.25	0.1875	0	0.1875	0.1875
2018-03-08	23:30:00	0	0	0	0.0625	0	0.4375	0	0.1875	0	0	0	0
2018-03-09	00:00:00	0	0	0	0	0	0.375	0	0.625	0	0	0	0
2018-03-09	00:30:00	0	0	0	0.0625	0	0	0	3.5625	0	0	0	0
2018-03-09	01:00:00	0	0	0	0	0	0	0	0.1875	0	0	0	0
2018-03-09	01:30:00	0	0	0	0.125	0	2.3125	0	0.0625	0	0	0	0
2018-03-09	02:00:00	0	0	0	0.1875	0	0.375	0	0	0	0	0	0
2018-03-09	02:30:00	0	0	0	3.625	0	0.0625	0	0.6875	0	0	0	0.125
2018-03-09	03:00:00	0	0.375	0	4.3125	0	0.25	0	0.5	0	0	0	0
2018-03-09	03:30:00	0	0	0	1.375	0	0.75	0	1.125	0	0	0	2
2018-03-09	04:00:00	0	0.625	0	3.75	0	3.9375	0	10.0625	0	0.25	0	4.0625
2018-03-09	04:30:00	2.5	5.0625	2.5	7.3125	2.5	0.8125	2.5	8.3125	2.5	1.0625	2.5	13.125
2018-03-09	05:00:00	5.4375	11.6875	5.4375	16.375	5.4375	6.9375	5.4375	19.0625	5.4375	2.5625	5.4375	20.6875
2018-03-09	05:30:00	14.4375	17.5625	14.4375	21.875	14.4375	8.125	14.4375	27.625	14.4375	6	14.4375	24.875
2018-03-09	06:00:00	16.0625	22.5625	16.0625	45.75	16.0625	25.6875	16.0625	39.5625	16.0625	9.4375	16.0625	35.375
2018-03-09	06:30:00	29.5	44.375	29.5	57.25	29.5	33.1875	29.5	54.75	29.5	22.3125	29.5	43.8125
2018-03-09	07:00:00	47.75	57.1875	47.75	67.1875	47.75	45.75	47.75	62.3125	47.75	38.25	47.75	46.1875
2018-03-09	07:30:00	59.4375	67.0625	59.4375	74.625	59.4375	54.375	59.4375	75.4375	59.4375	53	59.4375	60.375
2018-03-09	08:00:00	73.8125	69.3125	73.8125	71.1875	73.8125	63.75	73.8125	84.3125	73.8125	65.1875	73.8125	64.625
2018-03-09	08:30:00	67.6875	41.5	67.6875	53.625	67.6875	58.875	67.6875	52.9375	67.6875	68.5	67.6875	43.625
2018-03-09	09:00:00	2.8125	0.6875	2.8125	0.5	2.8125	4.1875	2.8125	4.5	2.8125	6.375	2.8125	2.8125
2018-03-09	09:30:00	0.0625	0	0.0625	1.5625	0.0625	0.1875	0.0625	5.5	0.0625	0.0625	0.0625	0.8125
2018-03-09	10:00:00	1.4375	2.5	1.4375	0.5	1.4375	0	1.4375	2.25	1.4375	0.0625	1.4375	0.125
2018-03-09	10:30:00	1.4375	0.125	1.4375	0.3125	1.4375	0	1.4375	0.875	1.4375	1	1.4375	2.4375
2018-03-09	11:00:00	0	0.1875	0	0	0	0.0625	0	0.25	0	1.4375	0	1.3125
2018-03-09	11:30:00	0	0.125	0	0	0	0.5	0	0.3125	0	0.0625	0	0.5
2018-03-09	12:00:00	0	0.3125	0	0.4375	0	0.125	0	1.3125	0	0.4375	0	1.4375
2018-03-09	12:30:00	0.9375	1.375	0.9375	1.1875	0.9375	0.5625	0.9375	0.1875	0.9375	0	0.9375	0
2018-03-09	13:00:00	0.8125	0.5625	0.8125	0.8125	0.8125	0.0625	0.8125	0.875	0.8125	0.6875	0.8125	0.5
2018-03-09	13:30:00	1.625	0.125	1.625	1.4375	1.625	0	1.625	1.75	1.625	1.875	1.625	0.375
2018-03-09	14:00:00	4.1875	0	4.1875	0.5	4.1875	1.875	4.1875	1.375	4.1875	0.5625	4.1875	0
2018-03-09	14:30:00	0.1875	0	0.1875	0.1875	0.1875	1.9375	0.1875	0.9375	0.1875	0	0.1875	0
2018-03-09	15:00:00	0.75	0.1875	0.75	0.5625	0.75	0.8125	0.75	1.3125	0.75	0.125	0.75	0.125
2018-03-09	15:30:00	3.3125	0	3.3125	0.375	3.3125	9.1875	3.3125	0	3.3125	0.1875	3.3125	4.1875
2018-03-09	16:00:00	0.875	0.5	0.875	3.0625	0.875	2.4375	0.875	4.8125	0.875	0.5625	0.875	1.4375
2018-03-09	16:30:00	0.0625	3.625	0.0625	0.4375	0.0625	0.8125	0.0625	1.8125	0.0625	0.0625	0.0625	0
2018-03-09	17:00:00	0.5625	2.5	0.5625	2.3125	0.5625	1.0625	0.5625	0	0.5625	4.5625	0.5625	1.6875
2018-03-09	17:30:00	6.125	2.6875	6.125	0.5	6.125	2.5625	6.125	0.375	6.125	0	6.125	5.4375
2018-03-09	18:00:00	4.5625	7.125	4.5625	0.375	4.5625	3.5625	4.5625	1.3125	4.5625	5.25	4.5625	3.625
2018-03-09	18:30:00	0.0625	4.8125	0.0625	2.625	0.0625	7	0.0625	3.625	0.0625	0.9375	0.0625	1.25
2018-03-09	19:00:00	1.75	2.875	1.75	2.8125	1.75	0.3125	1.75	2.3125	1.75	2.0625	1.75	1
2018-03-09	19:30:00	0.625	3.625	0.625	5.4375	0.625	1.4375	0.625	9.25	0.625	1.5625	0.625	55.1875
2018-03-09	20:00:00	10.75	9	10.75	4.75	10.75	6.0625	10.75	12.6875	10.75	7.875	10.75	9.75
2018-03-09	20:30:00	26.4375	7.8125	26.4375	6.1875	26.4375	12.3125	26.4375	27.5625	26.4375	13.9375	26.4375	3.5
2018-03-09	21:00:00	33.0625	14.875	33.0625	9.6875	33.0625	19.5625	33.0625	21.6875	33.0625	12.0625	33.0625	12.625
2018-03-09	21:30:00	25.0625	19.8125	25.0625	14.5	25.0625	20.875	25.0625	25.1875	25.0625	20.625	25.0625	16.6875
2018-03-09	22:00:00	11.25	16.1875	11.25	14.5625	11.25	18.4375	11.25	6.5625	11.25	8	11.25	11.875
2018-03-09	22:30:00	15.4375	26.1875	15.4375	33.3125	15.4375	27.9375	15.4375	15.4375	15.4375	5.9375	15.4375	16.1875
2018-03-09	23:00:00	6.3125	20.875	6.3125	32.0625	6.3125	25.4375	6.3125	28.625	6.3125	12.25	6.3125	22.125
2018-03-09	23:30:00	8.4375	17.1875	8.4375	27.5	8.4375	12.6875	8.4375	18.875	8.4375	3.5	8.4375	9.375
2018-03-10	00:00:00	10	16.5625	10	21	10	12.4375	10	11.0625	10	17.8125	10	13.1875
2018-03-10	00:30:00	10.125	19.3125	10.125	19.8125	10.125	23.125	10.125	23.5	10.125	24.1875	10.125	12.0625
2018-03-10	01:00:00	17.625	10.8125	17.625	13.1875	17.625	11.5	17.625	18.25	17.625	19.375	17.625	24.375
2018-03-10	01:30:00	16.5	16.125	16.5	9.875	16.5	16.6875	16.5	15.1875	16.5	22.5	16.5	14.3125
2018-03-10	02:00:00	18.4375	26.9375	18.4375	21	18.4375	7	18.4375	24.6875	18.4375	37.9375	18.4375	41.5625
2018-03-10	02:30:00	24.3125	15	24.3125	12.375	24.3125	6.9375	24.3125	48.75	24.3125	30.25	24.3125	42.9375
2018-03-10	03:00:00	23.0625	7.6875	23.0625	20.875	23.0625	17.375	23.0625	38	23.0625	36.9375	23.0625	39.625
2018-03-10	03:30:00	31.8125	25.5625	31.8125	20.625	31.8125	21.4375	31.8125	27.375	31.8125	32.875	31.8125	33.375
2018-03-10	04:00:00	40.3125	20.4375	40.3125	21.375	40.3125	24.25	40.3125	21.9375	40.3125	27.0625	40.3125	39.875
2018-03-10	04:30:00	48.375	36.0625	48.375	20.3125	48.375	24.5	48.375	22.3125	48.375	42.75	48.375	36.1875
2018-03-10	05:00:00	37.3125	30.5625	37.3125	20.4375	37.3125	24.1875	37.3125	19.5	37.3125	18.75	37.3125	36.4375
2018-03-10	05:30:00	28.5	26.375	28.5	30	28.5	32.5	28.5	25.5625	28.5	19.75	28.5	31.9375
2018-03-10	06:00:00	39.125	35.3125	39.125	32.375	39.125	32.8125	39.125	27.25	39.125	22.25	39.125	20.625
2018-03-10	06:30:00	46.6875	40.4375	46.6875	41.8125	46.6875	40.5	46.6875	31.0625	46.6875	14.1875	46.6875	14.125
2018-03-10	07:00:00	20.4375	36.1875	20.4375	37.9375	20.4375	23.8125	20.4375	8.375	20.4375	6.1875	20.4375	2.6875
2018-03-10	07:30:00	3.0625	21.75	3.0625	37.625	3.0625	36	3.0625	5.3125	3.0625	0	3.0625	0.1875
2018-03-10	08:00:00	0.5	19.375	0.5	33.6875	0.5	25.625	0.5	3.625	0.5	0.1875	0.5	0.125
2018-03-10	08:30:00	0.0625	16.4375	0.0625	26.625	0.0625	38.1875	0.0625	0	0.0625	0.0625	0.0625	0.875
2018-03-10	09:00:00	0.4375	7.6875	0.4375	33.5	0.4375	33.5	0.4375	0	0.4375	0	0.4375	0
2018-03-10	09:30:00	0.6875	3.875	0.6875	11.25	0.6875	29.6875	0.6875	0	0.6875	0.125	0.6875	0
2018-03-10	10:00:00	0.4375	0.875	0.4375	10.3125	0.4375	16.125	0.4375	0.0625	0.4375	0.0625	0.4375	0.125
2018-03-10	10:30:00	1.625	1.5625	1.625	7.1875	1.625	12.875	1.625	0	1.625	0.875	1.625	0.0625
2018-03-10	11:00:00	0.5625	1.375	0.5625	2.375	0.5625	9.5	0.5625	0	0.5625	3.75	0.5625	0.25
2018-03-10	11:30:00	1.9375	0.0625	1.9375	0.0625	1.9375	3.5	1.9375	0	1.9375	0.125	1.9375	0.125
2018-03-10	12:00:00	0.0625	0	0.0625	0	0.0625	0	0.0625	0.0625	0.0625	0	0.0625	0.125
2018-03-10	12:30:00	0.125	4.5625	0.125	0.9375	0.125	0.125	0.125	0.0625	0.125	0	0.125	0
2018-03-10	13:00:00	0.0625	0.125	0.0625	0	0.0625	0.6875	0.0625	0.125	0.0625	0	0.0625	0
2018-03-10	13:30:00	0.0625	0	0.0625	0	0.0625	0.375	0.0625	0	0.0625	0.75	0.0625	0.6875
2018-03-10	14:00:00	0.0625	0.125	0.0625	0.0625	0.0625	2.375	0.0625	0.9375	0.0625	1.125	0.0625	0.5625
2018-03-10	14:30:00	0.375	0	0.375	0	0.375	0.25	0.375	0.0625	0.375	2.625	0.375	0
2018-03-10	15:00:00	0.5	0	0.5	3.625	0.5	1.125	0.5	0	0.5	0.1875	0.5	0.0625
2018-03-10	15:30:00	0.3125	0.0625	0.3125	0.125	0.3125	0.875	0.3125	0.3125	0.3125	1.3125	0.3125	2.3125
2018-03-10	16:00:00	1	1.625	1	1.4375	1	2.4375	1	0.1875	1	2.25	1	4.125
2018-03-10	16:30:00	2.625	0.0625	2.625	0.1875	2.625	0.8125	2.625	0	2.625	5.5625	2.625	2.375
2018-03-10	17:00:00	4.5625	1.125	4.5625	0.3125	4.5625	0.75	4.5625	0	4.5625	6.3125	4.5625	5.9375
2018-03-10	17:30:00	0.4375	1.1875	0.4375	0.625	0.4375	2.1875	0.4375	5.625	0.4375	11	0.4375	9.375
2018-03-10	18:00:00	1	0	1	0.125	1	0.125	1	4.8125	1	7.375	1	15.9375
2018-03-10	18:30:00	2.1875	2.0625	2.1875	0.125	2.1875	6.6875	2.1875	17.125	2.1875	20.5	2.1875	16.875
2018-03-10	19:00:00	29	3.75	29	0.0625	29	4.125	29	9.9375	29	9.5625	29	10.6875
2018-03-10	19:30:00	23.0625	11.4375	23.0625	3.125	23.0625	6.75	23.0625	19	23.0625	11.6875	23.0625	19.125
2018-03-10	20:00:00	20.0625	15.5	20.0625	5.875	20.0625	9.1875	20.0625	16.5625	20.0625	6	20.0625	13.5625
2018-03-10	20:30:00	10.9375	20.0625	10.9375	1.375	10.9375	7.8125	10.9375	17.8125	10.9375	5.25	10.9375	11.8125
2018-03-10	21:00:00	10.125	20.4375	10.125	2.1875	10.125	9.375	10.125	17.25	10.125	12.8125	10.125	13.5
2018-03-10	21:30:00	16.125	13.6875	16.125	3.6875	16.125	20.9375	16.125	15.6875	16.125	6.625	16.125	6.4375
2018-03-10	22:00:00	15.1875	13.1875	15.1875	19.5	15.1875	28.125	15.1875	12.4375	15.1875	3.5625	15.1875	16.75
2018-03-10	22:30:00	3.9375	18.25	3.9375	23.8125	3.9375	21.0625	3.9375	18.5625	3.9375	14.125	3.9375	20.9375
2018-03-10	23:00:00	9.1875	18.6875	9.1875	14.625	9.1875	15.625	9.1875	12.25	9.1875	15.8125	9.1875	25.8125
2018-03-10	23:30:00	21.125	8.9375	21.125	25.9375	21.125	19.875	21.125	16.5	21.125	13.3125	21.125	20
2018-03-11	00:00:00	11.375	6.75	11.375	12.1875	11.375	18.625	11.375	4.8125	11.375	23.6875	11.375	21.375
2018-03-11	00:30:00	13.75	8.5625	13.75	6.8125	13.75	15.25	13.75	18.4375	13.75	29.1875	13.75	25.9375
2018-03-11	01:00:00	18.125	28	18.125	17.75	18.125	11.1875	18.125	21.875	18.125	25.625	18.125	29.875
2018-03-11	01:30:00	19	9.375	19	9.5	19	8.3125	19	20.9375	19	38.5625	19	32.8125
2018-03-11	02:00:00	27.5	12.5	27.5	15.125	27.5	15.0625	27.5	45.4375	27.5	33.6875	27.5	40.375
2018-03-11	02:30:00	28.5625	24.8125	28.5625	14.9375	28.5625	11.5	28.5625	33.25	28.5625	33.875	28.5625	35.375
2018-03-11	03:00:00	27.875	22.75	27.875	7.9375	27.875	18.5625	27.875	30	27.875	44.1875	27.875	33.5625
2018-03-11	03:30:00	46.5625	28.6875	46.5625	16.1875	46.5625	17.8125	46.5625	36.5625	46.5625	40.3125	46.5625	36.75
2018-03-11	04:00:00	35.3125	32.5625	35.3125	34.3125	35.3125	21.9375	35.3125	32.5	35.3125	44.5625	35.3125	36.5
2018-03-11	04:30:00	43.75	33.8125	43.75	30.625	43.75	26.6875	43.75	44	43.75	41.0625	43.75	40.75
2018-03-11	05:00:00	40.625	39.25	40.625	21.5	40.625	27.5	40.625	47.4375	40.625	32.5625	40.625	31.5625
2018-03-11	05:30:00	36.25	24.875	36.25	17.1875	36.25	38.0625	36.25	38.6875	36.25	25.0625	36.25	24.1875
2018-03-11	06:00:00	40.3125	50.125	40.3125	35.6875	40.3125	29.875	40.3125	39.8125	40.3125	20.0625	40.3125	22.75
2018-03-11	06:30:00	36.375	39.25	36.375	32.9375	36.375	37	36.375	33.4375	36.375	1.4375	36.375	7.25
2018-03-11	07:00:00	34.4375	27.5625	34.4375	43.25	34.4375	42.5625	34.4375	16.3125	34.4375	0	34.4375	0
2018-03-11	07:30:00	21.1875	33.5625	21.1875	29.0625	21.1875	44.375	21.1875	3	21.1875	0	21.1875	1.375
2018-03-11	08:00:00	7.5	24.875	7.5	49.8125	7.5	47.875	7.5	0.0625	7.5	0	7.5	0
2018-03-11	08:30:00	0.8125	24.25	0.8125	41.375	0.8125	33.25	0.8125	0.375	0.8125	0.375	0.8125	0
2018-03-11	09:00:00	0	23.0625	0	36.3125	0	45.5625	0	0	0	0.5	0	0.1875
2018-03-11	09:30:00	0	8.375	0	30.625	0	32.125	0	0.25	0	0	0	0.0625
2018-03-11	10:00:00	0	0.75	0	24.125	0	30.0625	0	0	0	0	0	0
2018-03-11	10:30:00	0.5	0	0.5	7.5625	0.5	20.875	0.5	0.125	0.5	0.375	0.5	0
2018-03-11	11:00:00	0.0625	0.0625	0.0625	8.1875	0.0625	13.1875	0.0625	0	0.0625	0.125	0.0625	0.0625
2018-03-11	11:30:00	1.0625	0	1.0625	2.4375	1.0625	2.75	1.0625	0.125	1.0625	0	1.0625	0.1875
2018-03-11	12:00:00	0	0	0	0.1875	0	6.625	0	0.5625	0	2.4375	0	0
2018-03-11	12:30:00	0.0625	0	0.0625	0.25	0.0625	0.375	0.0625	0.3125	0.0625	0	0.0625	2.375
2018-03-11	13:00:00	0.0625	0.0625	0.0625	0.25	0.0625	0.0625	0.0625	1.25	0.0625	0.375	0.0625	0
2018-03-11	13:30:00	0.6875	0.125	0.6875	0.125	0.6875	2.375	0.6875	0.6875	0.6875	0	0.6875	0.6875
2018-03-11	14:00:00	0.6875	0.125	0.6875	0	0.6875	1.75	0.6875	0.0625	0.6875	0.25	0.6875	1.125
2018-03-11	14:30:00	0.1875	0.125	0.1875	1.25	0.1875	0.4375	0.1875	0.1875	0.1875	3.25	0.1875	0
2018-03-11	15:00:00	0.4375	0	0.4375	0.1875	0.4375	2.375	0.4375	0.9375	0.4375	0.125	0.4375	0.3125
2018-03-11	15:30:00	0.0625	3.75	0.0625	0.25	0.0625	1.6875	0.0625	0.1875	0.0625	0.75	0.0625	3.3125
2018-03-11	16:00:00	0.1875	0	0.1875	0.5625	0.1875	1.3125	0.1875	0.4375	0.1875	3.875	0.1875	4.25
2018-03-11	16:30:00	0.375	1.8125	0.375	1.0625	0.375	0.3125	0.375	0.75	0.375	3.4375	0.375	3
2018-03-11	17:00:00	3.1875	4.5625	3.1875	0.125	3.1875	7	3.1875	1.6875	3.1875	4.4375	3.1875	10.75
2018-03-11	17:30:00	8	0	8	0.5	8	5.0625	8	6	8	2.0625	8	17.4375
2018-03-11	18:00:00	11.9375	2.1875	11.9375	0.4375	11.9375	9.6875	11.9375	11.375	11.9375	4.9375	11.9375	12
2018-03-11	18:30:00	15.125	8.6875	15.125	0.6875	15.125	0.5	15.125	15.875	15.125	6.125	15.125	16.8125
2018-03-11	19:00:00	7.3125	2.5625	7.3125	3.875	7.3125	7.25	7.3125	18.8125	7.3125	10.0625	7.3125	18.8125
2018-03-11	19:30:00	12.75	0.75	12.75	0.4375	12.75	4.625	12.75	12.6875	12.75	5	12.75	7.875
2018-03-11	20:00:00	21.5	8.625	21.5	2.125	21.5	6.5	21.5	16.1875	21.5	1.3125	21.5	6.5625
2018-03-11	20:30:00	12.9375	21.375	12.9375	5.3125	12.9375	10.3125	12.9375	15.625	12.9375	23.125	12.9375	11.8125
2018-03-11	21:00:00	5.8125	21.9375	5.8125	4.6875	5.8125	15.125	5.8125	9.5	5.8125	9.375	5.8125	11
2018-03-11	21:30:00	5.8125	12.25	5.8125	2.3125	5.8125	28.125	5.8125	8.75	5.8125	12.0625	5.8125	20.5625
2018-03-11	22:00:00	6.5	13.6875	6.5	11.75	6.5	12.1875	6.5	16.3125	6.5	15.5625	6.5	10.4375
2018-03-11	22:30:00	4.5625	15.9375	4.5625	15.875	4.5625	21.3125	4.5625	11.875	4.5625	17.25	4.5625	15.5625
2018-03-11	23:00:00	12.625	12.625	12.625	20.6875	12.625	12.625	12.625	11.625	12.625	4.8125	12.625	13.0625
2018-03-11	23:30:00	17.9375	7.625	17.9375	14.6875	17.9375	16.4375	17.9375	13.4375	17.9375	11	17.9375	24.8125
2018-03-12	00:00:00	14.5	10.875	14.5	14.875	14.5	14.5	14.5	24.5625	14.5	17.75	14.5	17.25
2018-03-12	00:30:00	25.5	18.0625	25.5	8.8125	25.5	14.5625	25.5	34.75	25.5	32.5625	25.5	30.625
2018-03-12	01:00:00	37.25	20.8125	37.25	12.125	37.25	26.25	37.25	39.125	37.25	46.6875	37.25	48.625
2018-03-12	01:30:00	42.9375	22.9375	42.9375	22.3125	42.9375	12.9375	42.9375	19.5625	42.9375	46.6875	42.9375	46.1875
2018-03-12	02:00:00	29.3125	18.0625	29.3125	30.0625	29.3125	8.375	29.3125	27.5	29.3125	31.9375	29.3125	40.375
2018-03-12	02:30:00	31.4375	18.25	31.4375	19.5	31.4375	15.875	31.4375	34	31.4375	32.125	31.4375	35.8125
2018-03-12	03:00:00	39.3125	26.625	39.3125	14.8125	39.3125	17.5	39.3125	31.375	39.3125	39.25	39.3125	37.625
2018-03-12	03:30:00	49.5	25.0625	49.5	11.8125	49.5	11.5625	49.5	26.0625	49.5	42.5	49.5	45.6875
2018-03-12	04:00:00	38.6875	32.25	38.6875	23.25	38.6875	22.4375	38.6875	33.5	38.6875	44.75	38.6875	41.5625
2018-03-12	04:30:00	42.9375	36.5	42.9375	37.3125	42.9375	21.6875	42.9375	42.0625	42.9375	40.5625	42.9375	45.5625
2018-03-12	05:00:00	42	33.6875	42	30	42	16.1875	42	45.625	42	32.375	42	34.5
2018-03-12	05:30:00	45.8125	38.5625	45.8125	36	45.8125	31.625	45.8125	40.875	45.8125	14.6875	45.8125	25.625
2018-03-12	06:00:00	41.75	34.5625	41.75	31.4375	41.75	29.3125	41.75	49.9375	41.75	3.4375	41.75	24.3125
2018-03-12	06:30:00	42.375	44.5625	42.375	47.1875	42.375	39.6875	42.375	34.0625	42.375	8.4375	42.375	9.1875
2018-03-12	07:00:00	34.5	31.0625	34.5	51.25	34.5	40.8125	34.5	10.875	34.5	0.5625	34.5	2.625
2018-03-12	07:30:00	20.5	38.25	20.5	47	20.5	45	20.5	2.0625	20.5	0.0625	20.5	0.4375
2018-03-12	08:00:00	9.625	36.4375	9.625	45.125	9.625	40.1875	9.625	0.5	9.625	0.125	9.625	0.9375
2018-03-12	08:30:00	5.3125	14.75	5.3125	32	5.3125	32.5625	5.3125	0	5.3125	0	5.3125	0
2018-03-12	09:00:00	1.3125	13.5625	1.3125	42.25	1.3125	43.25	1.3125	0	1.3125	0.75	1.3125	0
2018-03-12	09:30:00	0	11.9375	0	37.5625	0	41.3125	0	0	0	0.3125	0	0.875
2018-03-12	10:00:00	0.125	0.875	0.125	33.125	0.125	26.1875	0.125	0.0625	0.125	0.375	0.125	0
2018-03-12	10:30:00	0.4375	1.5625	0.4375	20.125	0.4375	18.1875	0.4375	0.1875	0.4375	0.125	0.4375	0.125
2018-03-12	11:00:00	0.0625	0.3125	0.0625	8.6875	0.0625	17.6875	0.0625	0	0.0625	0.4375	0.0625	0.5625
2018-03-12	11:30:00	0.4375	0.0625	0.4375	5.25	0.4375	16.1875	0.4375	0.5625	0.4375	0.3125	0.4375	0.4375
2018-03-12	12:00:00	0.375	0.375	0.375	1.5	0.375	6.3125	0.375	0.125	0.375	0.0625	0.375	0.5
2018-03-12	12:30:00	0.3125	0.4375	0.3125	1.875	0.3125	2.875	0.3125	0.0625	0.3125	0.1875	0.3125	0.9375
2018-03-12	13:00:00	0.0625	0.3125	0.0625	0.3125	0.0625	0.125	0.0625	0	0.0625	0.25	0.0625	0.1875
2018-03-12	13:30:00	0.0625	0.75	0.0625	0.1875	0.0625	0.75	0.0625	0	0.0625	0	0.0625	1.8125
2018-03-12	14:00:00	0	0.125	0	0.875	0	1	0	0	0	0.5	0	0.625
2018-03-12	14:30:00	0.1875	0.25	0.1875	0.375	0.1875	1.5625	0.1875	0.6875	0.1875	0.3125	0.1875	0.3125
2018-03-12	15:00:00	0.0625	0.0625	0.0625	0.0625	0.0625	2	0.0625	0.8125	0.0625	1.75	0.0625	0.4375
2018-03-12	15:30:00	0.0625	0.25	0.0625	0.125	0.0625	4.1875	0.0625	1.75	0.0625	1.4375	0.0625	0.625
2018-03-12	16:00:00	0.125	0.0625	0.125	0	0.125	4.1875	0.125	0.0625	0.125	3.5	0.125	2.9375
2018-03-12	16:30:00	0.0625	0.4375	0.0625	0.375	0.0625	1.375	0.0625	0.375	0.0625	3.6875	0.0625	7.625
2018-03-12	17:00:00	6.6875	0.375	6.6875	0.6875	6.6875	3.3125	6.6875	4.125	6.6875	8.8125	6.6875	15.75
2018-03-12	17:30:00	5.75	1.1875	5.75	1.1875	5.75	1.125	5.75	4.8125	5.75	13.3125	5.75	17.6875
2018-03-12	18:00:00	4.25	1.8125	4.25	0.3125	4.25	8.4375	4.25	10.75	4.25	8.1875	4.25	14.375
2018-03-12	18:30:00	6.0625	8.625	6.0625	0.0625	6.0625	7	6.0625	13.375	6.0625	4.0625	6.0625	8.0625
2018-03-12	19:00:00	7.8125	4.125	7.8125	0.875	7.8125	9.375	7.8125	12.8125	7.8125	5.625	7.8125	6.8125
2018-03-12	19:30:00	6.375	11.125	6.375	0.0625	6.375	6.1875	6.375	17.5625	6.375	2.625	6.375	5.4375
2018-03-12	20:00:00	9.4375	8.875	9.4375	0	9.4375	15.9375	9.4375	10.75	9.4375	11.8125	9.4375	8.125
2018-03-12	20:30:00	6.625	13.125	6.625	3.5	6.625	7.5625	6.625	9.75	6.625	12.125	6.625	15.3125
2018-03-12	21:00:00	8.3125	8.1875	8.3125	6.375	8.3125	13.25	8.3125	15.3125	8.3125	9.5	8.3125	10.4375
2018-03-12	21:30:00	10.375	12.4375	10.375	10	10.375	16.875	10.375	13.3125	10.375	13.875	10.375	19.1875
2018-03-12	22:00:00	9.75	5.25	9.75	14.375	9.75	13.6875	9.75	15.4375	9.75	16	9.75	15.5
2018-03-12	22:30:00	7.6875	7	7.6875	12.1875	7.6875	16.375	7.6875	18.3125	7.6875	9.1875	7.6875	17.0625
2018-03-12	23:00:00	13.1875	14.5625	13.1875	9.375	13.1875	17.3125	13.1875	11.6875	13.1875	21.5	13.1875	22.3125
2018-03-12	23:30:00	5.625	15.625	5.625	15.75	5.625	9.6875	5.625	8.3125	5.625	20.125	5.625	21.625
2018-03-13	00:00:00	10.9375	10.875	10.9375	9.875	10.9375	11	10.9375	11.875	10.9375	22.5625	10.9375	34.8125
2018-03-13	00:30:00	25.875	9	25.875	7.5	25.875	15.625	25.875	18.625	25.875	21.125	25.875	33.3125
2018-03-13	01:00:00	23.25	11	23.25	13.9375	23.25	14	23.25	23.3125	23.25	21.8125	23.25	32.0625
2018-03-13	01:30:00	32.0625	24.5625	32.0625	16.875	32.0625	14.3125	32.0625	27.1875	32.0625	32.5	32.0625	41.875
2018-03-13	02:00:00	27.375	23.8125	27.375	8	27.375	23.5625	27.375	31.9375	27.375	40	27.375	32.75
2018-03-13	02:30:00	35.125	25.5625	35.125	23.875	35.125	4.75	35.125	31.1875	35.125	32.875	35.125	40.3125
2018-03-13	03:00:00	37.4375	37.375	37.4375	17.0625	37.4375	16.75	37.4375	33.6875	37.4375	32.375	37.4375	38.625
2018-03-13	03:30:00	38.5625	28.1875	38.5625	23.1875	38.5625	24.75	38.5625	37.0625	38.5625	30.0625	38.5625	37.6875
2018-03-13	04:00:00	41.125	19.25	41.125	14.25	41.125	24.1875	41.125	33.75	41.125	27.375	41.125	36.6875
2018-03-13	04:30:00	44.1875	30.125	44.1875	34.1875	44.1875	27.25	44.1875	51.125	44.1875	35	44.1875	31.75
2018-03-13	05:00:00	36.4375	26.75	36.4375	30.1875	36.4375	30	36.4375	39.6875	36.4375	19.8125	36.4375	27.75
2018-03-13	05:30:00	43.1875	29.375	43.1875	28.375	43.1875	41.75	43.1875	45.625	43.1875	8.1875	43.1875	26.9375
2018-03-13	06:00:00	43.75	34.625	43.75	42.9375	43.75	30.5625	43.75	34.3125	43.75	5.375	43.75	18.8125
2018-03-13	06:30:00	37.1875	32.5	37.1875	30.5	37.1875	35.75	37.1875	29.125	37.1875	6.8125	37.1875	3.5625
2018-03-13	07:00:00	27.5	36.875	27.5	33.75	27.5	40.625	27.5	16.6875	27.5	1	27.5	2
2018-03-13	07:30:00	14.3125	27.5	14.3125	30.125	14.3125	39.4375	14.3125	8.9375	14.3125	0	14.3125	0.3125
2018-03-13	08:00:00	14.25	36.5	14.25	29.375	14.25	52.4375	14.25	1.625	14.25	0	14.25	1.3125
2018-03-13	08:30:00	5.6875	16.75	5.6875	34.6875	5.6875	40.8125	5.6875	4	5.6875	0	5.6875	0
2018-03-13	09:00:00	3.5625	19.9375	3.5625	38.6875	3.5625	42.9375	3.5625	0	3.5625	0.0625	3.5625	0.3125
2018-03-13	09:30:00	0.0625	6.75	0.0625	47.125	0.0625	38.75	0.0625	0.9375	0.0625	0	0.0625	0
2018-03-13	10:00:00	0.125	3.4375	0.125	26.4375	0.125	28.625	0.125	0	0.125	0.125	0.125	0
2018-03-13	10:30:00	0.875	3.5625	0.875	14.6875	0.875	21.1875	0.875	0.1875	0.875	0	0.875	0
2018-03-13	11:00:00	0.0625	1.625	0.0625	3.75	0.0625	13.125	0.0625	0.0625	0.0625	1.375	0.0625	1.75
2018-03-13	11:30:00	0.375	0.9375	0.375	6.875	0.375	11.25	0.375	0.125	0.375	0.125	0.375	0.5625
2018-03-13	12:00:00	0.0625	2.6875	0.0625	6.75	0.0625	4.3125	0.0625	0.5	0.0625	0.8125	0.0625	0.0625
2018-03-13	12:30:00	0	3	0	0.625	0	3.875	0	1.0625	0	1.4375	0	0.0625
2018-03-13	13:00:00	0.25	2.375	0.25	3.0625	0.25	2.3125	0.25	0.1875	0.25	1.5	0.25	0.4375
2018-03-13	13:30:00	0.0625	0.1875	0.0625	0	0.0625	0.6875	0.0625	4.75	0.0625	5.375	0.0625	0.75
2018-03-13	14:00:00	0	2.3125	0	1.0625	0	1.25	0	1.375	0	0.625	0	1.5
2018-03-13	14:30:00	0.0625	0.125	0.0625	0	0.0625	3.9375	0.0625	6.875	0.0625	1.375	0.0625	0.875
2018-03-13	15:00:00	0.0625	0	0.0625	0	0.0625	3.375	0.0625	0.875	0.0625	1.5	0.0625	0.8125
2018-03-13	15:30:00	1.9375	5.125	1.9375	0.875	1.9375	0.5625	1.9375	0.3125	1.9375	4.875	1.9375	7
2018-03-13	16:00:00	2.5625	0.5625	2.5625	0.3125	2.5625	6.6875	2.5625	1.6875	2.5625	8.9375	2.5625	11.9375
2018-03-13	16:30:00	1	1.8125	1	0	1	3.5	1	0.5	1	3.875	1	13.1875
2018-03-13	17:00:00	1.0625	1.875	1.0625	1.25	1.0625	1	1.0625	4.4375	1.0625	7.3125	1.0625	12.9375
2018-03-13	17:30:00	7.375	0.8125	7.375	0.125	7.375	2.1875	7.375	12.6875	7.375	6.9375	7.375	6.625
2018-03-13	18:00:00	5.9375	5.25	5.9375	1.25	5.9375	4.875	5.9375	7.4375	5.9375	5.375	5.9375	11
2018-03-13	18:30:00	8.6875	6.9375	8.6875	0.1875	8.6875	1.1875	8.6875	13.3125	8.6875	8.375	8.6875	13.8125
2018-03-13	19:00:00	8.25	8.5625	8.25	1.3125	8.25	4.125	8.25	13.8125	8.25	9.875	8.25	7.4375
2018-03-13	19:30:00	8.8125	12.1875	8.8125	1.0625	8.8125	10.625	8.8125	18.375	8.8125	4.8125	8.8125	15.9375
2018-03-13	20:00:00	10.8125	10.125	10.8125	5.375	10.8125	10.625	10.8125	6.8125	10.8125	4.875	10.8125	9.8125
2018-03-13	20:30:00	3.6875	12.25	3.6875	9.25	3.6875	8.375	3.6875	9.75	3.6875	14.875	3.6875	5.6875
2018-03-13	21:00:00	6.5625	14.125	6.5625	4.625	6.5625	17.5625	6.5625	6.125	6.5625	7.625	6.5625	15.8125
2018-03-13	21:30:00	16.625	6	16.625	7.8125	16.625	13.1875	16.625	14.625	16.625	11.0625	16.625	15.625
2018-03-13	22:00:00	18.625	9	18.625	8.75	18.625	12.75	18.625	6.8125	18.625	11.1875	18.625	18.875
2018-03-13	22:30:00	4	9.25	4	14.0625	4	10.375	4	11	4	14.375	4	15.9375
2018-03-13	23:00:00	9.875	12.6875	9.875	14.5	9.875	11.3125	9.875	11.6875	9.875	12.6875	9.875	15.3125
2018-03-13	23:30:00	16.5625	8.875	16.5625	9.1875	16.5625	21	16.5625	20.4375	16.5625	14.375	16.5625	31.0625
2018-03-14	00:00:00	19.75	9.8125	19.75	11.1875	19.75	5.25	19.75	32.3125	19.75	35	19.75	23.25
2018-03-14	00:30:00	14.9375	13.375	14.9375	5.1875	14.9375	11.875	14.9375	14.75	14.9375	29	14.9375	33.25
2018-03-14	01:00:00	22.5	19.1875	22.5	21	22.5	10.625	22.5	6.75	22.5	29.125	22.5	35.3125
2018-03-14	01:30:00	27	12.25	27	8.75	27	17.9375	27	15.4375	27	35.625	27	34.1875
2018-03-14	02:00:00	30.6875	16.1875	30.6875	9.8125	30.6875	19.5	30.6875	39.1875	30.6875	25.375	30.6875	35.8125
2018-03-14	02:30:00	34.5	22.75	34.5	13.4375	34.5	14.8125	34.5	33.125	34.5	34.9375	34.5	44.625
2018-03-14	03:00:00	22.75	30.6875	22.75	19.25	22.75	23.1875	22.75	48	22.75	35.875	22.75	41.8125
2018-03-14	03:30:00	37.4375	20	37.4375	20.1875	37.4375	22.0625	37.4375	45.875	37.4375	29.6875	37.4375	35.125
2018-03-14	04:00:00	46.375	33.3125	46.375	21.6875	46.375	22.75	46.375	45.1875	46.375	31.9375	46.375	33.75
2018-03-14	04:30:00	38.875	35.6875	38.875	20.125	38.875	24.875	38.875	48.25	38.875	31.75	38.875	33.6875
2018-03-14	05:00:00	33.5625	29.9375	33.5625	33.75	33.5625	41.4375	33.5625	40.6875	33.5625	28.4375	33.5625	27.875
2018-03-14	05:30:00	50.6875	42.8125	50.6875	23	50.6875	32.0625	50.6875	39.1875	50.6875	21.1875	50.6875	21.5625
2018-03-14	06:00:00	37	35.5	37	35.5	37	48.125	37	39.5625	37	8.1875	37	17.6875
2018-03-14	06:30:00	31.6875	37.75	31.6875	24.25	31.6875	45.625	31.6875	29.5625	31.6875	2.9375	31.6875	6.9375
2018-03-14	07:00:00	19.4375	33.25	19.4375	46.125	19.4375	48.0625	19.4375	21.375	19.4375	3.375	19.4375	1.875
2018-03-14	07:30:00	10.5625	22.125	10.5625	35.3125	10.5625	48.625	10.5625	6.8125	10.5625	0.5625	10.5625	0
2018-03-14	08:00:00	5.3125	15.625	5.3125	39	5.3125	44.75	5.3125	2.5	5.3125	0.0625	5.3125	3.5
2018-03-14	08:30:00	10.1875	19.75	10.1875	39.1875	10.1875	49.4375	10.1875	1.375	10.1875	0.0625	10.1875	0.8125
2018-03-14	09:00:00	4.375	12.75	4.375	25.0625	4.375	44.6875	4.375	1.4375	4.375	0	4.375	0.8125
2018-03-14	09:30:00	0.1875	11.3125	0.1875	16.5625	0.1875	38.0625	0.1875	0	0.1875	2.4375	0.1875	0.4375
2018-03-14	10:00:00	0.1875	6.5625	0.1875	13.125	0.1875	27.0625	0.1875	0	0.1875	0.5625	0.1875	2.5625
2018-03-14	10:30:00	4.3125	6.1875	4.3125	14.6875	4.3125	18	4.3125	0.0625	4.3125	0.1875	4.3125	0.625
2018-03-14	11:00:00	0.0625	3.75	0.0625	7.375	0.0625	6.1875	0.0625	0	0.0625	0.375	0.0625	0.75
2018-03-14	11:30:00	0	3.125	0	6.4375	0	6.625	0	0	0	1.3125	0	0.0625
2018-03-14	12:00:00	0.0625	0.75	0.0625	5.625	0.0625	6.4375	0.0625	0	0.0625	1.625	0.0625	4.1875
2018-03-14	12:30:00	4.25	0.875	4.25	2.0625	4.25	8.75	4.25	0	4.25	2.1875	4.25	0.125
2018-03-14	13:00:00	0	0.5625	0	0.125	0	3.625	0	0.1875	0	0	0	0
2018-03-14	13:30:00	0	1.25	0	0	0	3.125	0	0.0625	0	2.25	0	2.5625
2018-03-14	14:00:00	0	0.0625	0	0.3125	0	3	0	0	0	3.625	0	2.3125
2018-03-14	14:30:00	0	0	0	0	0	5.375	0	0	0	5.875	0	0.75
2018-03-14	15:00:00	0.5625	0	0.5625	0.6875	0.5625	5.8125	0.5625	0	0.5625	1.8125	0.5625	5.75
2018-03-14	15:30:00	0.75	0	0.75	0.0625	0.75	3.25	0.75	0	0.75	3	0.75	3.875
2018-03-14	16:00:00	1.5625	0.1875	1.5625	0.9375	1.5625	2.625	1.5625	6.75	1.5625	3.25	1.5625	8.625
2018-03-14	16:30:00	4.0625	0.125	4.0625	1.6875	4.0625	1.5	4.0625	6.625	4.0625	2.875	4.0625	4
2018-03-14	17:00:00	5.3125	0.75	5.3125	0	5.3125	0.9375	5.3125	3.1875	5.3125	4.0625	5.3125	12.375
2018-03-14	17:30:00	7.375	8.3125	7.375	2.125	7.375	3.1875	7.375	6.6875	7.375	6.875	7.375	11.125
2018-03-14	18:00:00	4.1875	5.4375	4.1875	0.0625	4.1875	3.3125	4.1875	1.9375	4.1875	12.1875	4.1875	9.1875
2018-03-14	18:30:00	14.125	7.9375	14.125	0.6875	14.125	9.9375	14.125	8.875	14.125	5.625	14.125	4.8125
2018-03-14	19:00:00	15.9375	4.625	15.9375	0.875	15.9375	10.8125	15.9375	13.625	15.9375	2.6875	15.9375	12.25
2018-03-14	19:30:00	14.9375	6.125	14.9375	4.5	14.9375	2.5	14.9375	11.6875	14.9375	4.6875	14.9375	8.5
2018-03-14	20:00:00	12.5625	5.3125	12.5625	1.625	12.5625	4.5625	12.5625	8.875	12.5625	3.5625	12.5625	11.25
2018-03-14	20:30:00	8.4375	13.8125	8.4375	11.3125	8.4375	10.5625	8.4375	19.375	8.4375	8.125	8.4375	17.25
2018-03-14	21:00:00	5.25	6.5	5.25	4.5625	5.25	16.4375	5.25	12.125	5.25	8.6875	5.25	12.3125
2018-03-14	21:30:00	12.5	12.0625	12.5	3.9375	12.5	19.625	12.5	8.8125	12.5	7.5	12.5	11.25
2018-03-14	22:00:00	7	15.5	7	12.875	7	13.6875	7	6.0625	7	13.375	7	11.5625
2018-03-14	22:30:00	4.9375	18.3125	4.9375	14.9375	4.9375	13.4375	4.9375	12.6875	4.9375	28.1875	4.9375	20.6875
2018-03-14	23:00:00	2.375	8.5	2.375	10.125	2.375	11.6875	2.375	13	2.375	24.1875	2.375	23.125
2018-03-14	23:30:00	21.5625	19.8125	21.5625	12.3125	21.5625	6.3125	21.5625	18	21.5625	22	21.5625	35.5
2018-03-15	00:00:00	14.9375	5.6875	14.9375	10.375	14.9375	4.5	14.9375	15.25	14.9375	19.4375	14.9375	30.875
2018-03-15	00:30:00	26.5625	8.75	26.5625	8.875	26.5625	9.625	26.5625	16.3125	26.5625	20	26.5625	34.375
2018-03-15	01:00:00	29.0625	13.5	29.0625	13.8125	29.0625	10.25	29.0625	21.9375	29.0625	31.3125	29.0625	37.1875
2018-03-15	01:30:00	30.6875	11.4375	30.6875	6.5625	30.6875	20.75	30.6875	26.375	30.6875	36.375	30.6875	39.625
2018-03-15	02:00:00	45.0625	17	45.0625	9.875	45.0625	11.4375	45.0625	39.625	45.0625	36.3125	45.0625	43.25
2018-03-15	02:30:00	37.125	18.3125	37.125	18	37.125	17.1875	37.125	38.1875	37.125	42.6875	37.125	39.875
2018-03-15	03:00:00	37.9375	21.6875	37.9375	22.1875	37.9375	19	37.9375	36.625	37.9375	40.6875	37.9375	42.6875
2018-03-15	03:30:00	36.375	20.75	36.375	21.375	36.375	16.875	36.375	45.3125	36.375	31.125	36.375	47.1875
2018-03-15	04:00:00	47.4375	20.75	47.4375	18.125	47.4375	21.75	47.4375	41.25	47.4375	29.4375	47.4375	35.125
2018-03-15	04:30:00	40.9375	29.5625	40.9375	27.1875	40.9375	26.375	40.9375	36.875	40.9375	22.9375	40.9375	39.5
2018-03-15	05:00:00	45.125	30.75	45.125	29.625	45.125	31.5	45.125	33.8125	45.125	20.9375	45.125	32.25
2018-03-15	05:30:00	46.1875	32.875	46.1875	35.3125	46.1875	27.875	46.1875	30.4375	46.1875	8.4375	46.1875	27.0625
2018-03-15	06:00:00	38	39.4375	38	24.375	38	43.3125	38	31.25	38	5.4375	38	19.875
2018-03-15	06:30:00	25.75	29.625	25.75	36.4375	25.75	38.5	25.75	15.625	25.75	6.3125	25.75	10.5
2018-03-15	07:00:00	15.6875	11.9375	15.6875	25.3125	15.6875	41.3125	15.6875	9.1875	15.6875	4.125	15.6875	2.25
2018-03-15	07:30:00	8.3125	16.25	8.3125	34	8.3125	41.375	8.3125	2.3125	8.3125	2.5625	8.3125	0.5
2018-03-15	08:00:00	9.625	14.0625	9.625	34.3125	9.625	38.9375	9.625	0.875	9.625	0.375	9.625	2.0625
2018-03-15	08:30:00	15.75	6.5625	15.75	35.125	15.75	31.3125	15.75	0.4375	15.75	0.0625	15.75	1.625
2018-03-15	09:00:00	8.125	4.8125	8.125	22.0625	8.125	20.125	8.125	0	8.125	0	8.125	3.625
2018-03-15	09:30:00	2.1875	4.1875	2.1875	21	2.1875	19.1875	2.1875	0.1875	2.1875	0.375	2.1875	1.0625
2018-03-15	10:00:00	3.25	4.875	3.25	11.0625	3.25	18.625	3.25	0.125	3.25	1.0625	3.25	0.5625
2018-03-15	10:30:00	0.125	3.6875	0.125	6	0.125	16.9375	0.125	0.25	0.125	0	0.125	2.25
2018-03-15	11:00:00	1	0.1875	1	5.1875	1	11	1	0	1	2.875	1	3
2018-03-15	11:30:00	0.375	0	0.375	4.5625	0.375	3.25	0.375	2.8125	0.375	0.375	0.375	1
2018-03-15	12:00:00	1.1875	0.4375	1.1875	5.6875	1.1875	1.625	1.1875	3.4375	1.1875	0	1.1875	0.9375
2018-03-15	12:30:00	0	0	0	3.625	0	5.125	0	0	0	0.5	0	0
2018-03-15	13:00:00	0.4375	1.125	0.4375	2.75	0.4375	2	0.4375	0	0.4375	3.25	0.4375	1.4375
2018-03-15	13:30:00	0.25	0	0.25	0.5625	0.25	0.5	0.25	0	0.25	2.8125	0.25	0.3125
2018-03-15	14:00:00	1.5	0.9375	1.5	0.6875	1.5	0.9375	1.5	0.1875	1.5	0.625	1.5	0
2018-03-15	14:30:00	0	0.9375	0	1.75	0	0.4375	0	0.4375	0	1.75	0	2.4375
2018-03-15	15:00:00	0.5	0.125	0.5	0.3125	0.5	6	0.5	1.9375	0.5	0.1875	0.5	2.0625
2018-03-15	15:30:00	0.375	0	0.375	1.4375	0.375	0.3125	0.375	2.625	0.375	5.4375	0.375	4.875
2018-03-15	16:00:00	1.75	0.125	1.75	0.0625	1.75	4.5625	1.75	0.3125	1.75	1.3125	1.75	8.3125
2018-03-15	16:30:00	6.6875	0.6875	6.6875	0.0625	6.6875	0.9375	6.6875	3.0625	6.6875	4.75	6.6875	10.5625
2018-03-15	17:00:00	6.75	4.5625	6.75	2.6875	6.75	10.9375	6.75	5.75	6.75	3.5625	6.75	9
2018-03-15	17:30:00	9.375	1.5625	9.375	0.6875	9.375	6.75	9.375	6.5625	9.375	3.6875	9.375	12.25
2018-03-15	18:00:00	25.25	4.0625	25.25	4.375	25.25	9.3125	25.25	14.125	25.25	8.5625	25.25	10.875
2018-03-15	18:30:00	8.5	3.4375	8.5	2.875	8.5	10.9375	8.5	2.5625	8.5	9.6875	8.5	6.9375
2018-03-15	19:00:00	5.875	9.6875	5.875	3.4375	5.875	10.3125	5.875	8.8125	5.875	5.6875	5.875	4.25
2018-03-15	19:30:00	3.3125	9.375	3.3125	3	3.3125	12.875	3.3125	9.9375	3.3125	2.4375	3.3125	8.875
2018-03-15	20:00:00	9.25	7.1875	9.25	4.625	9.25	11.5625	9.25	8.625	9.25	5	9.25	6.8125
2018-03-15	20:30:00	8.8125	4.3125	8.8125	5.5	8.8125	12.5	8.8125	12.75	8.8125	6.25	8.8125	9.6875
2018-03-15	21:00:00	10.4375	2.6875	10.4375	12.6875	10.4375	12.0625	10.4375	4.0625	10.4375	11.1875	10.4375	13.4375
2018-03-15	21:30:00	4.0625	7.25	4.0625	10.9375	4.0625	13.3125	4.0625	7.0625	4.0625	10.625	4.0625	17.8125
2018-03-15	22:00:00	8.5	9.625	8.5	7.75	8.5	13.8125	8.5	15.0625	8.5	6.1875	8.5	11.3125
2018-03-15	22:30:00	11.3125	13.875	11.3125	11.125	11.3125	12.25	11.3125	11.125	11.3125	15.0625	11.3125	25.3125
2018-03-15	23:00:00	10.5625	16.8125	10.5625	6.6875	10.5625	11.5	10.5625	17.625	10.5625	32.125	10.5625	21.1875
2018-03-15	23:30:00	13.9375	13.1875	13.9375	12.375	13.9375	8.25	13.9375	21.8125	13.9375	21.875	13.9375	36.125

## Sheet: Psi KD 2
Graphs show behavior in DD
LD: 3-Mar-18 to 9-Mar-18
DD: 10-Mar-18 to 15-Mar-18
TD2/PsiRNAiKK
	Time	No Light Pulse	ZT13 Pulse	No Light Pulse	ZT15 Pulse	No Light Pulse	ZT17 Pulse	No Light Pulse	ZT19 Pulse	No Light Pulse	ZT21 Pulse	No Light Pulse	ZT23 Pulse
2018-03-03	00:00:00	43.125	48.75	43.125	42.6875	43.125	17.625	43.125	37.3125	43.125	21.9375	43.125	29.8125
2018-03-03	00:30:00	30.875	43.25	30.875	31.25	30.875	11.375	30.875	24.9375	30.875	17.875	30.875	21.375
2018-03-03	01:00:00	20.875	36.75	20.875	19.9375	20.875	7.4375	20.875	12.625	20.875	10.6875	20.875	12.9375
2018-03-03	01:30:00	22	32.25	22	24.5625	22	8	22	8.0625	22	7.9375	22	11.9375
2018-03-03	02:00:00	11.875	32.625	11.875	14.5625	11.875	6.6875	11.875	8.1875	11.875	4.0625	11.875	8.1875
2018-03-03	02:30:00	5.625	25.3125	5.625	11.6875	5.625	3.625	5.625	8.0625	5.625	3.0625	5.625	9.1875
2018-03-03	03:00:00	7.125	21.75	7.125	10.9375	7.125	4.75	7.125	7	7.125	1.6875	7.125	8.5625
2018-03-03	03:30:00	5.75	20.5	5.75	11.4375	5.75	3.125	5.75	3.5	5.75	1.625	5.75	5.8125
2018-03-03	04:00:00	5.0625	16.6875	5.0625	6.3125	5.0625	2	5.0625	8.4375	5.0625	1.5625	5.0625	6.9375
2018-03-03	04:30:00	5.5	14.5	5.5	7.625	5.5	7.3125	5.5	2.875	5.5	5.5	5.5	4.125
2018-03-03	05:00:00	3.375	13	3.375	9.125	3.375	12.75	3.375	10.4375	3.375	5.5625	3.375	9.125
2018-03-03	05:30:00	7.375	13.25	7.375	13.625	7.375	12.4375	7.375	5.5	7.375	6.75	7.375	3.0625
2018-03-03	06:00:00	8.75	9.5625	8.75	13.9375	8.75	10	8.75	6.25	8.75	7.75	8.75	5.875
2018-03-03	06:30:00	5.5625	12.25	5.5625	9.5	5.5625	9.3125	5.5625	9.5625	5.5625	3.1875	5.5625	7.75
2018-03-03	07:00:00	7.625	9.125	7.625	10.3125	7.625	12.1875	7.625	7.3125	7.625	4.25	7.625	6.25
2018-03-03	07:30:00	11.25	12.5625	11.25	10.6875	11.25	6	11.25	9.4375	11.25	5.6875	11.25	9.5625
2018-03-03	08:00:00	17.125	13.375	17.125	4.25	17.125	8.3125	17.125	15.375	17.125	9.5	17.125	14.625
2018-03-03	08:30:00	47.6875	49.3125	47.6875	48.75	47.6875	60.5	47.6875	59.5	47.6875	62.625	47.6875	61.5
2018-03-03	09:00:00	25.3125	7.875	25.3125	16.5625	25.3125	17.9375	25.3125	29.875	25.3125	22.8125	25.3125	19.5625
2018-03-03	09:30:00	5.8125	0.5	5.8125	0.25	5.8125	1.75	5.8125	7.125	5.8125	4.4375	5.8125	4.0625
2018-03-03	10:00:00	0.1875	0.125	0.1875	1.375	0.1875	0.125	0.1875	4.625	0.1875	5.3125	0.1875	0.9375
2018-03-03	10:30:00	0.5625	1.6875	0.5625	0.5625	0.5625	0	0.5625	7.5625	0.5625	2.75	0.5625	0.375
2018-03-03	11:00:00	0.4375	7.6875	0.4375	0.375	0.4375	0.8125	0.4375	5.3125	0.4375	4.75	0.4375	1.625
2018-03-03	11:30:00	3.75	1.6875	3.75	2.8125	3.75	1.5	3.75	0.4375	3.75	3.3125	3.75	1.1875
2018-03-03	12:00:00	0.625	1.4375	0.625	0.5	0.625	0.5	0.625	0	0.625	1.625	0.625	0.1875
2018-03-03	12:30:00	2.5625	3.9375	2.5625	4.625	2.5625	1.75	2.5625	1.4375	2.5625	1.375	2.5625	0.0625
2018-03-03	13:00:00	2.6875	1.375	2.6875	6	2.6875	4	2.6875	0	2.6875	6.75	2.6875	5.4375
2018-03-03	13:30:00	4.1875	4.375	4.1875	5.8125	4.1875	5.8125	4.1875	2.875	4.1875	5	4.1875	3.4375
2018-03-03	14:00:00	11.8125	6.875	11.8125	8.375	11.8125	5.125	11.8125	13	11.8125	3.3125	11.8125	3.8125
2018-03-03	14:30:00	8.8125	12.1875	8.8125	14.8125	8.8125	5.3125	8.8125	7.3125	8.8125	8	8.8125	9.375
2018-03-03	15:00:00	9.8125	15.25	9.8125	5.9375	9.8125	0.6875	9.8125	4.6875	9.8125	8.6875	9.8125	5.4375
2018-03-03	15:30:00	6.0625	15.75	6.0625	15.8125	6.0625	1.875	6.0625	3.0625	6.0625	13.5	6.0625	11.0625
2018-03-03	16:00:00	3.8125	18.125	3.8125	10	3.8125	5	3.8125	9	3.8125	6.8125	3.8125	9
2018-03-03	16:30:00	2.8125	7.875	2.8125	10.1875	2.8125	6.375	2.8125	3.0625	2.8125	13.5	2.8125	4.25
2018-03-03	17:00:00	5.4375	4.1875	5.4375	11.75	5.4375	5.3125	5.4375	0.5625	5.4375	11.4375	5.4375	7.6875
2018-03-03	17:30:00	5.4375	5.0625	5.4375	15.375	5.4375	1.25	5.4375	6.375	5.4375	5.25	5.4375	19.75
2018-03-03	18:00:00	8.375	6.1875	8.375	26.25	8.375	14.875	8.375	8.5	8.375	6.875	8.375	15.1875
2018-03-03	18:30:00	9.1875	16.625	9.1875	18.5	9.1875	13.3125	9.1875	7.6875	9.1875	7.0625	9.1875	12.5625
2018-03-03	19:00:00	4.625	18.625	4.625	21	4.625	13.125	4.625	2.4375	4.625	19.9375	4.625	15.5625
2018-03-03	19:30:00	26.375	20.1875	26.375	12.0625	26.375	17.875	26.375	10.1875	26.375	25.25	26.375	15.0625
2018-03-03	20:00:00	20.875	24.6875	20.875	13.875	20.875	14	20.875	22.75	20.875	15.25	20.875	11.625
2018-03-03	20:30:00	74.6875	59.0625	74.6875	73.5625	74.6875	48.9375	74.6875	54.375	74.6875	43	74.6875	55.5625
2018-03-03	21:00:00	49.4375	39.0625	49.4375	51.25	49.4375	32.0625	49.4375	41.3125	49.4375	30.875	49.4375	37.0625
2018-03-03	21:30:00	41.8125	25.5	41.8125	27.5625	41.8125	19.0625	41.8125	27.9375	41.8125	28.9375	41.8125	22.5
2018-03-03	22:00:00	26.25	24.125	26.25	23.9375	26.25	12.5625	26.25	20.375	26.25	14.6875	26.25	26.3125
2018-03-03	22:30:00	18.5625	19.375	18.5625	14.375	18.5625	12.125	18.5625	15.25	18.5625	18	18.5625	18.25
2018-03-03	23:00:00	14.9375	9.625	14.9375	15.5625	14.9375	7.75	14.9375	9.6875	14.9375	17.4375	14.9375	17.8125
2018-03-03	23:30:00	12.8125	12.125	12.8125	9.875	12.8125	8.75	12.8125	10.875	12.8125	9.125	12.8125	13.6875
2018-03-04	00:00:00	10.1875	12.9375	10.1875	13.5625	10.1875	5.625	10.1875	9.6875	10.1875	8.125	10.1875	12.125
2018-03-04	00:30:00	9.5625	18.375	9.5625	9.0625	9.5625	2.75	9.5625	11.4375	9.5625	5.5625	9.5625	8.875
2018-03-04	01:00:00	9.4375	10	9.4375	5.75	9.4375	4.1875	9.4375	9.5	9.4375	10.125	9.4375	12.125
2018-03-04	01:30:00	5.5	11.25	5.5	18.25	5.5	5.0625	5.5	7.6875	5.5	3.8125	5.5	11.125
2018-03-04	02:00:00	16.0625	12.8125	16.0625	12.375	16.0625	5.75	16.0625	11.75	16.0625	6.9375	16.0625	5.3125
2018-03-04	02:30:00	18.3125	23.8125	18.3125	17.875	18.3125	6.75	18.3125	17	18.3125	15.3125	18.3125	9.75
2018-03-04	03:00:00	22.1875	36.8125	22.1875	23.6875	22.1875	10.6875	22.1875	18.5625	22.1875	14.25	22.1875	16.4375
2018-03-04	03:30:00	26.8125	44.75	26.8125	36.125	26.8125	12.0625	26.8125	22.625	26.8125	7.625	26.8125	20.875
2018-03-04	04:00:00	38.5	41.4375	38.5	47	38.5	21.3125	38.5	29	38.5	25.625	38.5	31.5
2018-03-04	04:30:00	47.75	53.4375	47.75	52.5625	47.75	28.6875	47.75	37.9375	47.75	24.25	47.75	35.75
2018-03-04	05:00:00	62.5	62.6875	62.5	61.1875	62.5	37.8125	62.5	50.5625	62.5	29.25	62.5	49.875
2018-03-04	05:30:00	70.9375	62.25	70.9375	69	70.9375	40.9375	70.9375	54.6875	70.9375	35.625	70.9375	57.1875
2018-03-04	06:00:00	72.75	68.125	72.75	72.875	72.75	52.25	72.75	59.5	72.75	40.4375	72.75	58.125
2018-03-04	06:30:00	78.1875	71.25	78.1875	79	78.1875	54.375	78.1875	61.5	78.1875	49.625	78.1875	58.5
2018-03-04	07:00:00	80.9375	67.375	80.9375	71.25	80.9375	54.8125	80.9375	63.3125	80.9375	45.75	80.9375	62.9375
2018-03-04	07:30:00	78.375	65	78.375	79.875	78.375	55.625	78.375	59.0625	78.375	41.875	78.375	66.4375
2018-03-04	08:00:00	73.5	59.4375	73.5	79.375	73.5	56.75	73.5	59.875	73.5	45.125	73.5	61.625
2018-03-04	08:30:00	60.4375	54.875	60.4375	54.1875	60.4375	69.0625	60.4375	48.1875	60.4375	55.3125	60.4375	54.0625
2018-03-04	09:00:00	5.0625	2.25	5.0625	3.8125	5.0625	0.8125	5.0625	7.8125	5.0625	5.1875	5.0625	5.0625
2018-03-04	09:30:00	2.5	6.5	2.5	9.625	2.5	0.9375	2.5	0.4375	2.5	1.75	2.5	0.3125
2018-03-04	10:00:00	4.1875	2.3125	4.1875	3	4.1875	1.75	4.1875	1	4.1875	1.375	4.1875	0.3125
2018-03-04	10:30:00	0.25	1.875	0.25	1.5	0.25	0.9375	0.25	0.6875	0.25	0.6875	0.25	1.75
2018-03-04	11:00:00	0	1.1875	0	7.625	0	1.125	0	3.625	0	0.6875	0	2.625
2018-03-04	11:30:00	0.375	1.75	0.375	13.25	0.375	0.8125	0.375	3.25	0.375	0.0625	0.375	1.375
2018-03-04	12:00:00	4.875	1.75	4.875	2.5	4.875	0.125	4.875	4.8125	4.875	1.25	4.875	1.25
2018-03-04	12:30:00	2.25	1.5625	2.25	3.625	2.25	5.5625	2.25	6	2.25	6.375	2.25	1.9375
2018-03-04	13:00:00	2.75	1.5	2.75	6.5625	2.75	0.4375	2.75	5.6875	2.75	7.4375	2.75	0.6875
2018-03-04	13:30:00	1.125	1	1.125	2.75	1.125	3.3125	1.125	4.0625	1.125	7.125	1.125	2.5625
2018-03-04	14:00:00	0.8125	1.125	0.8125	2.875	0.8125	0.8125	0.8125	3.375	0.8125	4.0625	0.8125	0.1875
2018-03-04	14:30:00	5.5	1.375	5.5	0.875	5.5	1.125	5.5	9.375	5.5	8.3125	5.5	3.3125
2018-03-04	15:00:00	0.625	2.375	0.625	4.9375	0.625	1.5	0.625	8.25	0.625	4.8125	0.625	1.5625
2018-03-04	15:30:00	0.25	0.125	0.25	6.0625	0.25	6.1875	0.25	4.6875	0.25	13.9375	0.25	1.5
2018-03-04	16:00:00	1.9375	4.4375	1.9375	0.75	1.9375	0.25	1.9375	4.5	1.9375	13.1875	1.9375	8.875
2018-03-04	16:30:00	3.8125	9.5625	3.8125	14.8125	3.8125	1.375	3.8125	6.5625	3.8125	5.5625	3.8125	5.4375
2018-03-04	17:00:00	5.4375	10.125	5.4375	10.3125	5.4375	6.6875	5.4375	2	5.4375	7.125	5.4375	9.25
2018-03-04	17:30:00	9.9375	18.875	9.9375	6.5	9.9375	2.4375	9.9375	7.5625	9.9375	4.5	9.9375	7.9375
2018-03-04	18:00:00	14.1875	9.875	14.1875	15.1875	14.1875	11.25	14.1875	13.8125	14.1875	12.4375	14.1875	5.3125
2018-03-04	18:30:00	18.4375	13.1875	18.4375	10.125	18.4375	12.1875	18.4375	1.25	18.4375	23.25	18.4375	10.875
2018-03-04	19:00:00	7.3125	23.875	7.3125	24.75	7.3125	17.0625	7.3125	4.625	7.3125	5.625	7.3125	8.5
2018-03-04	19:30:00	10.125	19.5	10.125	21.5625	10.125	24.8125	10.125	16.8125	10.125	12.125	10.125	10.375
2018-03-04	20:00:00	20.6875	29.8125	20.6875	33.375	20.6875	12.375	20.6875	16.1875	20.6875	23.4375	20.6875	22.9375
2018-03-04	20:30:00	90.25	72.125	90.25	82.375	90.25	77.125	90.25	80.125	90.25	63.75	90.25	78.5
2018-03-04	21:00:00	63.0625	50.25	63.0625	52.0625	63.0625	40.875	63.0625	52.625	63.0625	42	63.0625	43.875
2018-03-04	21:30:00	35	24.6875	35	37.5	35	27.125	35	23.5625	35	24.5	35	27.1875
2018-03-04	22:00:00	19.3125	11.75	19.3125	14.875	19.3125	19.25	19.3125	10.0625	19.3125	17.1875	19.3125	21.375
2018-03-04	22:30:00	12.4375	8.3125	12.4375	10.875	12.4375	11.3125	12.4375	7.5625	12.4375	8.0625	12.4375	15.5625
2018-03-04	23:00:00	12.625	2.25	12.625	9.6875	12.625	8.9375	12.625	7.1875	12.625	8.6875	12.625	7.4375
2018-03-04	23:30:00	4.0625	3.3125	4.0625	10	4.0625	6.125	4.0625	3.4375	4.0625	8.25	4.0625	5.5
2018-03-05	00:00:00	3.3125	5.6875	3.3125	3.75	3.3125	1.4375	3.3125	4.0625	3.3125	4.1875	3.3125	7.0625
2018-03-05	00:30:00	9.5625	6.5625	9.5625	12.6875	9.5625	3.3125	9.5625	3.125	9.5625	2.1875	9.5625	0.5
2018-03-05	01:00:00	4.75	4.8125	4.75	2.625	4.75	0.6875	4.75	0.75	4.75	1.125	4.75	4.625
2018-03-05	01:30:00	3.75	4.625	3.75	7.25	3.75	2.5	3.75	3.625	3.75	3.0625	3.75	6.4375
2018-03-05	02:00:00	11.375	4.375	11.375	7	11.375	1	11.375	1.3125	11.375	2.5	11.375	9.75
2018-03-05	02:30:00	10.4375	6.375	10.4375	13.875	10.4375	4.9375	10.4375	6.5625	10.4375	1.8125	10.4375	7.3125
2018-03-05	03:00:00	8.5	14.0625	8.5	10.75	8.5	6.5625	8.5	10.8125	8.5	4.875	8.5	15.375
2018-03-05	03:30:00	12.25	27	12.25	18.875	12.25	3	12.25	8.875	12.25	5.75	12.25	10.375
2018-03-05	04:00:00	19.6875	26.4375	19.6875	21.5625	19.6875	8	19.6875	21.8125	19.6875	9.5	19.6875	17.9375
2018-03-05	04:30:00	29.5625	33	29.5625	25.75	29.5625	10.625	29.5625	30.9375	29.5625	8.75	29.5625	14.75
2018-03-05	05:00:00	33.0625	38.1875	33.0625	33.8125	33.0625	12.25	33.0625	23.9375	33.0625	13.5625	33.0625	17
2018-03-05	05:30:00	38.625	40.9375	38.625	43.5	38.625	27.0625	38.625	40.75	38.625	19.6875	38.625	28.75
2018-03-05	06:00:00	43.625	52.3125	43.625	53.375	43.625	32.375	43.625	40.1875	43.625	24.3125	43.625	35.8125
2018-03-05	06:30:00	54.3125	51.125	54.3125	54.5625	54.3125	41.8125	54.3125	54	54.3125	34.25	54.3125	47.5625
2018-03-05	07:00:00	64	59.25	64	64.875	64	41.3125	64	61.9375	64	37.25	64	58.5
2018-03-05	07:30:00	75.75	65.0625	75.75	72.625	75.75	44.25	75.75	62.875	75.75	40.8125	75.75	61.75
2018-03-05	08:00:00	83.0625	67.4375	83.0625	76.625	83.0625	55.5	83.0625	73.0625	83.0625	46.875	83.0625	61.625
2018-03-05	08:30:00	64.875	61.625	64.875	83.875	64.875	77.75	64.875	55.5625	64.875	54.6875	64.875	65
2018-03-05	09:00:00	14.375	7.625	14.375	22.9375	14.375	13.625	14.375	15.5	14.375	13.375	14.375	7.625
2018-03-05	09:30:00	4.9375	3.25	4.9375	8.4375	4.9375	5.25	4.9375	10.3125	4.9375	13.3125	4.9375	1.8125
2018-03-05	10:00:00	5.75	4.5625	5.75	7.625	5.75	4.25	5.75	3.4375	5.75	4.75	5.75	1.9375
2018-03-05	10:30:00	7.875	1.5625	7.875	4.875	7.875	10.5	7.875	0.5625	7.875	5.1875	7.875	0.375
2018-03-05	11:00:00	0.6875	4.4375	0.6875	11.4375	0.6875	8.125	0.6875	1.5625	0.6875	3.0625	0.6875	0.9375
2018-03-05	11:30:00	5.75	3.875	5.75	4.1875	5.75	3.8125	5.75	2.3125	5.75	5.1875	5.75	1.5625
2018-03-05	12:00:00	3	1	3	3.3125	3	13	3	1.1875	3	7.4375	3	0.125
2018-03-05	12:30:00	3.375	0.8125	3.375	3.125	3.375	6.9375	3.375	8.1875	3.375	7.125	3.375	1.5
2018-03-05	13:00:00	2.1875	0.75	2.1875	2.9375	2.1875	9.375	2.1875	6	2.1875	8.625	2.1875	5.125
2018-03-05	13:30:00	1.125	1.5	1.125	4.625	1.125	11.5	1.125	1	1.125	6.8125	1.125	3.9375
2018-03-05	14:00:00	1.9375	2.5625	1.9375	4.25	1.9375	8.1875	1.9375	3.0625	1.9375	2.9375	1.9375	0.75
2018-03-05	14:30:00	3.5625	2.8125	3.5625	1.1875	3.5625	7.0625	3.5625	5.125	3.5625	0.9375	3.5625	4.25
2018-03-05	15:00:00	7.25	6.375	7.25	6.9375	7.25	2.875	7.25	6.625	7.25	1.9375	7.25	5.875
2018-03-05	15:30:00	7.4375	2.625	7.4375	5	7.4375	6.8125	7.4375	7.6875	7.4375	1.0625	7.4375	1.75
2018-03-05	16:00:00	12	7.875	12	2.3125	12	4.0625	12	6.3125	12	4.25	12	2.75
2018-03-05	16:30:00	1.4375	1	1.4375	0.9375	1.4375	8.75	1.4375	6.375	1.4375	1.3125	1.4375	11.1875
2018-03-05	17:00:00	5.0625	4.875	5.0625	19.5	5.0625	4.375	5.0625	7	5.0625	6.0625	5.0625	15.75
2018-03-05	17:30:00	8.5	10.5	8.5	20.3125	8.5	5.3125	8.5	3.6875	8.5	12.125	8.5	14.6875
2018-03-05	18:00:00	4.375	19.125	4.375	17.0625	4.375	12.25	4.375	2.8125	4.375	12.625	4.375	18.25
2018-03-05	18:30:00	6.9375	19.4375	6.9375	11.8125	6.9375	9.6875	6.9375	16.75	6.9375	16	6.9375	7.1875
2018-03-05	19:00:00	8.875	26.625	8.875	21.3125	8.875	14.6875	8.875	16.0625	8.875	7.875	8.875	2.9375
2018-03-05	19:30:00	13.125	27	13.125	14.0625	13.125	27.1875	13.125	7.625	13.125	6.875	13.125	25.4375
2018-03-05	20:00:00	16.6875	35.9375	16.6875	32.25	16.6875	23.625	16.6875	14.5625	16.6875	16.6875	16.6875	33.4375
2018-03-05	20:30:00	97.375	76.4375	97.375	75.0625	97.375	74.125	97.375	88.625	97.375	66.6875	97.375	81
2018-03-05	21:00:00	64.5	52.75	64.5	42.8125	64.5	36.25	64.5	45.0625	64.5	41.4375	64.5	41.0625
2018-03-05	21:30:00	40	23.125	40	21.0625	40	20.3125	40	31.25	40	13.625	40	25.4375
2018-03-05	22:00:00	21.25	9.125	21.25	21	21.25	8.5625	21.25	22.0625	21.25	5.875	21.25	13.0625
2018-03-05	22:30:00	9.25	2.8125	9.25	6.875	9.25	6.0625	9.25	6.3125	9.25	3.5	9.25	6.125
2018-03-05	23:00:00	6.6875	0.5	6.6875	6.125	6.6875	5.25	6.6875	5.6875	6.6875	1.5	6.6875	7.6875
2018-03-05	23:30:00	5.5	0.875	5.5	2.9375	5.5	4.5625	5.5	3.0625	5.5	3.375	5.5	4.75
2018-03-06	00:00:00	4.375	0.625	4.375	2	4.375	4.25	4.375	1.5	4.375	4.0625	4.375	2.75
2018-03-06	00:30:00	4.0625	1.6875	4.0625	3.5	4.0625	2.875	4.0625	4.875	4.0625	3.8125	4.0625	1.6875
2018-03-06	01:00:00	4.9375	2.625	4.9375	4.9375	4.9375	0.9375	4.9375	6.5625	4.9375	1.875	4.9375	4.875
2018-03-06	01:30:00	4.9375	11.4375	4.9375	7.25	4.9375	0.4375	4.9375	4.9375	4.9375	0.1875	4.9375	6.375
2018-03-06	02:00:00	8.3125	5.4375	8.3125	15.5	8.3125	2.0625	8.3125	11	8.3125	7.125	8.3125	7
2018-03-06	02:30:00	3.6875	7	3.6875	17.25	3.6875	2.0625	3.6875	4.4375	3.6875	1.3125	3.6875	2.75
2018-03-06	03:00:00	11.25	13	11.25	7.1875	11.25	7.5625	11.25	9.1875	11.25	9	11.25	13.875
2018-03-06	03:30:00	12.8125	22.1875	12.8125	18.125	12.8125	5.875	12.8125	19.875	12.8125	1.9375	12.8125	18.8125
2018-03-06	04:00:00	18.5625	22.4375	18.5625	34.625	18.5625	11.5	18.5625	23.875	18.5625	6.9375	18.5625	19.3125
2018-03-06	04:30:00	32.3125	32.25	32.3125	34.8125	32.3125	18.0625	32.3125	26.9375	32.3125	15.0625	32.3125	18.1875
2018-03-06	05:00:00	30.8125	28.375	30.8125	31.75	30.8125	11.5625	30.8125	28.25	30.8125	16.1875	30.8125	21.4375
2018-03-06	05:30:00	41.625	40.5625	41.625	36.9375	41.625	24.5625	41.625	35.25	41.625	18.0625	41.625	29.8125
2018-03-06	06:00:00	44.0625	47.25	44.0625	43.75	44.0625	22.875	44.0625	29.5625	44.0625	33.5	44.0625	39.8125
2018-03-06	06:30:00	51.125	62.0625	51.125	50.875	51.125	31.1875	51.125	46.1875	51.125	33.4375	51.125	41.6875
2018-03-06	07:00:00	71.5	63.875	71.5	62.3125	71.5	46.5	71.5	59	71.5	41.8125	71.5	43.8125
2018-03-06	07:30:00	67.375	74.125	67.375	70.5625	67.375	48.0625	67.375	65.6875	67.375	52.5625	67.375	55.6875
2018-03-06	08:00:00	77.4375	73.625	77.4375	79.3125	77.4375	57	77.4375	64.625	77.4375	51.8125	77.4375	64.75
2018-03-06	08:30:00	54.9375	55.3125	54.9375	67.875	54.9375	81	54.9375	55.875	54.9375	56.75	54.9375	60.25
2018-03-06	09:00:00	14.625	3.0625	14.625	22.25	14.625	20.4375	14.625	10	14.625	22.4375	14.625	9.375
2018-03-06	09:30:00	8.9375	3.75	8.9375	11.5	8.9375	3.9375	8.9375	5.4375	8.9375	12.5625	8.9375	2.5
2018-03-06	10:00:00	3.5	6.9375	3.5	6.3125	3.5	4.1875	3.5	1.75	3.5	5.5	3.5	5.4375
2018-03-06	10:30:00	2.8125	0.125	2.8125	1.6875	2.8125	4.625	2.8125	3.8125	2.8125	2.9375	2.8125	4.0625
2018-03-06	11:00:00	0.9375	3	0.9375	3.5	0.9375	4.25	0.9375	6.6875	0.9375	2.6875	0.9375	2.4375
2018-03-06	11:30:00	5.3125	1.6875	5.3125	0.9375	5.3125	2.6875	5.3125	0.3125	5.3125	6.125	5.3125	1.125
2018-03-06	12:00:00	2.875	0.25	2.875	1.75	2.875	1.6875	2.875	7.9375	2.875	4.8125	2.875	3.625
2018-03-06	12:30:00	2.1875	0.625	2.1875	5.875	2.1875	1.9375	2.1875	3.4375	2.1875	3.6875	2.1875	6.5625
2018-03-06	13:00:00	2.625	2	2.625	4.4375	2.625	3.75	2.625	2.8125	2.625	1.3125	2.625	6.5
2018-03-06	13:30:00	3.375	0.875	3.375	4.3125	3.375	2.5	3.375	0.375	3.375	0.4375	3.375	0.3125
2018-03-06	14:00:00	0.0625	2.375	0.0625	0.6875	0.0625	2.4375	0.0625	5.875	0.0625	0.6875	0.0625	4
2018-03-06	14:30:00	2.5625	7.5625	2.5625	7.625	2.5625	2.875	2.5625	0.125	2.5625	1.3125	2.5625	0.625
2018-03-06	15:00:00	3.25	11.6875	3.25	1.6875	3.25	2.5	3.25	4.5	3.25	2.8125	3.25	1.3125
2018-03-06	15:30:00	2.1875	4.125	2.1875	7.0625	2.1875	0.4375	2.1875	1.9375	2.1875	7.375	2.1875	3
2018-03-06	16:00:00	5.875	2.5	5.875	10.5	5.875	0.0625	5.875	4.3125	5.875	1.125	5.875	3.0625
2018-03-06	16:30:00	2.125	3.9375	2.125	2.375	2.125	8.0625	2.125	3.0625	2.125	0.75	2.125	2.1875
2018-03-06	17:00:00	0.1875	5.125	0.1875	1.75	0.1875	3.5	0.1875	13	0.1875	7.25	0.1875	3.4375
2018-03-06	17:30:00	0	11.25	0	5.625	0	6.3125	0	0.875	0	11.5	0	9.9375
2018-03-06	18:00:00	0.1875	12	0.1875	6.875	0.1875	13.6875	0.1875	2.0625	0.1875	8.375	0.1875	8.6875
2018-03-06	18:30:00	8.25	4.875	8.25	5.0625	8.25	4.6875	8.25	2.0625	8.25	11.25	8.25	11.625
2018-03-06	19:00:00	16.4375	9.875	16.4375	13.8125	16.4375	5.4375	16.4375	6.125	16.4375	9.625	16.4375	4.5
2018-03-06	19:30:00	10.375	15.625	10.375	14.5625	10.375	20.9375	10.375	7.625	10.375	11.875	10.375	16.6875
2018-03-06	20:00:00	15.6875	18.625	15.6875	25.4375	15.6875	21.4375	15.6875	8	15.6875	16.4375	15.6875	20.8125
2018-03-06	20:30:00	106.438	81.875	106.438	84.625	106.438	81.5	106.438	78.1875	106.438	63.6875	106.438	65.625
2018-03-06	21:00:00	59.875	49.5	59.875	44.625	59.875	33.6875	59.875	41.75	59.875	30.1875	59.875	39.875
2018-03-06	21:30:00	35.9375	19.25	35.9375	29.8125	35.9375	13.875	35.9375	14.375	35.9375	14.625	35.9375	26
2018-03-06	22:00:00	13.8125	4.4375	13.8125	13.9375	13.8125	7.6875	13.8125	8.375	13.8125	3.8125	13.8125	17.1875
2018-03-06	22:30:00	6.5625	2.9375	6.5625	9.1875	6.5625	8.0625	6.5625	5.5	6.5625	1.75	6.5625	10.5625
2018-03-06	23:00:00	6.375	0.5	6.375	8.4375	6.375	0	6.375	3.4375	6.375	1.375	6.375	8.4375
2018-03-06	23:30:00	5.5	0.4375	5.5	2.4375	5.5	0	5.5	3.1875	5.5	1.9375	5.5	3.6875
2018-03-07	00:00:00	3.625	0.3125	3.625	2.875	3.625	0	3.625	3	3.625	2.375	3.625	4.75
2018-03-07	00:30:00	6.625	1.625	6.625	7.0625	6.625	0.3125	6.625	8.625	6.625	0.6875	6.625	0.625
2018-03-07	01:00:00	7	5.8125	7	2.3125	7	0.375	7	6.4375	7	1.9375	7	4.5
2018-03-07	01:30:00	6.5	4.5	6.5	3.6875	6.5	0	6.5	0.9375	6.5	2.375	6.5	0.4375
2018-03-07	02:00:00	6	6.625	6	11.8125	6	1	6	0.125	6	3.875	6	6.8125
2018-03-07	02:30:00	8.8125	11	8.8125	9.625	8.8125	1.0625	8.8125	5	8.8125	1.0625	8.8125	8.9375
2018-03-07	03:00:00	10.5	16	10.5	9.5625	10.5	0.5625	10.5	10	10.5	5.4375	10.5	13
2018-03-07	03:30:00	14	21.9375	14	20.25	14	10.375	14	9.3125	14	7.375	14	17.1875
2018-03-07	04:00:00	22.5	24.1875	22.5	25.9375	22.5	5.25	22.5	16.375	22.5	6.9375	22.5	15.6875
2018-03-07	04:30:00	28.375	37	28.375	25.625	28.375	9.4375	28.375	26.125	28.375	14.5625	28.375	25
2018-03-07	05:00:00	32.5	35.9375	32.5	33.75	32.5	24.9375	32.5	30.625	32.5	17.75	32.5	28.625
2018-03-07	05:30:00	43.625	35.375	43.625	34.1875	43.625	20.3125	43.625	32.5	43.625	22.5625	43.625	24.875
2018-03-07	06:00:00	46.6875	40.75	46.6875	39.6875	46.6875	23.3125	46.6875	48.0625	46.6875	34.625	46.6875	34.1875
2018-03-07	06:30:00	55	50	55	46.9375	55	31.0625	55	51.3125	55	37.5625	55	36.6875
2018-03-07	07:00:00	73.875	63.5	73.875	56.3125	73.875	45.375	73.875	53.0625	73.875	42.125	73.875	44
2018-03-07	07:30:00	68.625	71.5	68.625	69.5	68.625	51	68.625	61.8125	68.625	47.625	68.625	53.375
2018-03-07	08:00:00	76.5	77.6875	76.5	66.5	76.5	54	76.5	58.8125	76.5	51.125	76.5	56.9375
2018-03-07	08:30:00	55.375	53.1875	55.375	55.9375	55.375	74.125	55.375	52.125	55.375	56.9375	55.375	48.1875
2018-03-07	09:00:00	9.6875	6.625	9.6875	10.3125	9.6875	23.9375	9.6875	5.8125	9.6875	17.75	9.6875	11.5625
2018-03-07	09:30:00	4.8125	3.4375	4.8125	3.4375	4.8125	3.9375	4.8125	3.4375	4.8125	6.6875	4.8125	2.0625
2018-03-07	10:00:00	5.0625	3.25	5.0625	2.5625	5.0625	0.6875	5.0625	2.3125	5.0625	2.1875	5.0625	2.1875
2018-03-07	10:30:00	3.5625	2.6875	3.5625	1.8125	3.5625	1.625	3.5625	1.5	3.5625	2.0625	3.5625	0.75
2018-03-07	11:00:00	3.375	3.75	3.375	2.375	3.375	4.9375	3.375	1.875	3.375	1.3125	3.375	3.6875
2018-03-07	11:30:00	3.25	2.1875	3.25	1.875	3.25	3.25	3.25	3.6875	3.25	2.4375	3.25	2.5
2018-03-07	12:00:00	6.4375	3.625	6.4375	5.1875	6.4375	1.125	6.4375	1.375	6.4375	0.3125	6.4375	1.25
2018-03-07	12:30:00	3.9375	4.5625	3.9375	2.4375	3.9375	1.5625	3.9375	3.5625	3.9375	4.375	3.9375	2.5625
2018-03-07	13:00:00	5.9375	0.4375	5.9375	1.0625	5.9375	5.875	5.9375	1.4375	5.9375	1.6875	5.9375	5.1875
2018-03-07	13:30:00	1.8125	2.4375	1.8125	0.75	1.8125	3	1.8125	0.25	1.8125	1.6875	1.8125	1.5625
2018-03-07	14:00:00	0.3125	3.0625	0.3125	0.625	0.3125	0.4375	0.3125	8.5625	0.3125	1	0.3125	1.4375
2018-03-07	14:30:00	3.9375	1.125	3.9375	0.3125	3.9375	3.6875	3.9375	5.875	3.9375	3.9375	3.9375	0.25
2018-03-07	15:00:00	4.4375	3.875	4.4375	0.375	4.4375	3.1875	4.4375	3.5625	4.4375	0.0625	4.4375	0.8125
2018-03-07	15:30:00	8.75	0.8125	8.75	1.5	8.75	1.6875	8.75	1.4375	8.75	2.4375	8.75	4.875
2018-03-07	16:00:00	2.5	0.1875	2.5	6.375	2.5	1.3125	2.5	2.25	2.5	1.875	2.5	0.375
2018-03-07	16:30:00	0	3.375	0	9.5625	0	5.375	0	0	0	0.4375	0	2.8125
2018-03-07	17:00:00	6	2.6875	6	1.5	6	9.75	6	3.4375	6	1.1875	6	1.4375
2018-03-07	17:30:00	6	6.9375	6	6.25	6	8.8125	6	4.1875	6	5.6875	6	6.25
2018-03-07	18:00:00	3.625	15.9375	3.625	8.125	3.625	10.625	3.625	1.8125	3.625	8.9375	3.625	6.625
2018-03-07	18:30:00	0.5625	4.875	0.5625	9.25	0.5625	3.8125	0.5625	6.6875	0.5625	1.25	0.5625	10.3125
2018-03-07	19:00:00	1.0625	4.8125	1.0625	5.875	1.0625	4.375	1.0625	2.1875	1.0625	6.8125	1.0625	6.3125
2018-03-07	19:30:00	6.4375	9.375	6.4375	12.875	6.4375	16.4375	6.4375	5.625	6.4375	10.8125	6.4375	6.125
2018-03-07	20:00:00	10.75	11.625	10.75	14.6875	10.75	17.375	10.75	8.8125	10.75	9.9375	10.75	8.8125
2018-03-07	20:30:00	93.1875	78.8125	93.1875	87	93.1875	72.5625	93.1875	84.3125	93.1875	67.0625	93.1875	66.1875
2018-03-07	21:00:00	54.1875	46.1875	54.1875	37.8125	54.1875	31.875	54.1875	45.375	54.1875	30.375	54.1875	34.6875
2018-03-07	21:30:00	23.875	17	23.875	17.5625	23.875	12.6875	23.875	21	23.875	8.8125	23.875	16.625
2018-03-07	22:00:00	7	6.6875	7	13.625	7	7.0625	7	6.875	7	5.9375	7	2.9375
2018-03-07	22:30:00	4.375	9.75	4.375	0.375	4.375	3.375	4.375	6.375	4.375	3.3125	4.375	5.0625
2018-03-07	23:00:00	7.8125	3.8125	7.8125	0	7.8125	1.5	7.8125	3	7.8125	3.875	7.8125	1.375
2018-03-07	23:30:00	2.1875	3.9375	2.1875	1.4375	2.1875	0.6875	2.1875	1.6875	2.1875	0.625	2.1875	1.1875
2018-03-08	00:00:00	0.1875	0	0.1875	0.375	0.1875	0	0.1875	0.8125	0.1875	0.6875	0.1875	1.9375
2018-03-08	00:30:00	2.5	1.1875	2.5	2.125	2.5	0.0625	2.5	1.6875	2.5	3.125	2.5	5.4375
2018-03-08	01:00:00	0.5625	2.0625	0.5625	0	0.5625	6.875	0.5625	3.4375	0.5625	1.875	0.5625	3.0625
2018-03-08	01:30:00	2.875	3.375	2.875	0	2.875	0.5625	2.875	0.625	2.875	0.4375	2.875	2.3125
2018-03-08	02:00:00	0.875	4.875	0.875	1.875	0.875	0	0.875	3.125	0.875	0	0.875	2.8125
2018-03-08	02:30:00	4.0625	10.5625	4.0625	1.375	4.0625	0.4375	4.0625	0.1875	4.0625	1.3125	4.0625	3.1875
2018-03-08	03:00:00	5.4375	21.375	5.4375	15.5	5.4375	1.5625	5.4375	7.8125	5.4375	1.875	5.4375	12.4375
2018-03-08	03:30:00	23.75	14.375	23.75	23.4375	23.75	0.3125	23.75	12.375	23.75	4.75	23.75	9
2018-03-08	04:00:00	15.375	32.125	15.375	25.875	15.375	8.375	15.375	10.875	15.375	6.75	15.375	11.6875
2018-03-08	04:30:00	27.625	28.5	27.625	29.75	27.625	16.0625	27.625	20	27.625	14.125	27.625	19.4375
2018-03-08	05:00:00	40.5625	33.4375	40.5625	26.8125	40.5625	22.625	40.5625	27.125	40.5625	20.875	40.5625	24.5625
2018-03-08	05:30:00	30.0625	41.5	30.0625	33.5	30.0625	22.25	30.0625	30.3125	30.0625	21.5	30.0625	23.4375
2018-03-08	06:00:00	39.25	42.4375	39.25	35.3125	39.25	23.25	39.25	28.4375	39.25	29	39.25	34.3125
2018-03-08	06:30:00	53.6875	52.625	53.6875	49.125	53.6875	32.5625	53.6875	34.375	53.6875	37.1875	53.6875	41.5
2018-03-08	07:00:00	62	60.125	62	52	62	44.6875	62	47	62	41.0625	62	48.3125
2018-03-08	07:30:00	65.75	71.4375	65.75	64.125	65.75	42.375	65.75	52.8125	65.75	42.8125	65.75	50.4375
2018-03-08	08:00:00	72.1875	69.625	72.1875	68.4375	72.1875	46.5	72.1875	60.875	72.1875	53.875	72.1875	45.4375
2018-03-08	08:30:00	43.5	37.5625	43.5	47.625	43.5	72.25	43.5	43.1875	43.5	56.4375	43.5	47.375
2018-03-08	09:00:00	5.8125	1	5.8125	8.75	5.8125	18.25	5.8125	9	5.8125	11.875	5.8125	7.3125
2018-03-08	09:30:00	5	1.375	5	2.8125	5	1.8125	5	2.625	5	3	5	2.375
2018-03-08	10:00:00	0.5625	2.625	0.5625	3.5	0.5625	1.25	0.5625	1	0.5625	1.9375	0.5625	0.8125
2018-03-08	10:30:00	2	1.125	2	0.1875	2	1.125	2	0	2	2.8125	2	2.4375
2018-03-08	11:00:00	0.0625	0.6875	0.0625	2.6875	0.0625	1.625	0.0625	0	0.0625	0	0.0625	1.4375
2018-03-08	11:30:00	2	2.1875	2	1.9375	2	0.9375	2	0.25	2	2.5625	2	0.1875
2018-03-08	12:00:00	0.3125	0.1875	0.3125	0.125	0.3125	1.9375	0.3125	0.125	0.3125	2.75	0.3125	1.25
2018-03-08	12:30:00	0.1875	0.0625	0.1875	0.125	0.1875	1.75	0.1875	0.25	0.1875	1.8125	0.1875	4.8125
2018-03-08	13:00:00	1.5625	3.0625	1.5625	1.125	1.5625	0.375	1.5625	2.4375	1.5625	2.1875	1.5625	5.8125
2018-03-08	13:30:00	0.5	0.3125	0.5	1.5625	0.5	8.9375	0.5	0	0.5	1.0625	0.5	4.3125
2018-03-08	14:00:00	0	0.75	0	2.4375	0	2.9375	0	4.875	0	1.25	0	2.375
2018-03-08	14:30:00	0.875	0.125	0.875	0.5625	0.875	5.625	0.875	2.125	0.875	1.75	0.875	9.125
2018-03-08	15:00:00	0.0625	3.6875	0.0625	9.5	0.0625	0.5	0.0625	7.4375	0.0625	0.1875	0.0625	1.6875
2018-03-08	15:30:00	1.9375	0.125	1.9375	1.75	1.9375	1.9375	1.9375	0.1875	1.9375	0.4375	1.9375	1.9375
2018-03-08	16:00:00	0.25	3	0.25	3.625	0.25	2.6875	0.25	0.0625	0.25	1.3125	0.25	0.75
2018-03-08	16:30:00	2.5625	0.5	2.5625	0.625	2.5625	4.8125	2.5625	3.25	2.5625	0	2.5625	1.3125
2018-03-08	17:00:00	6.1875	0.4375	6.1875	2.5	6.1875	7.3125	6.1875	0.5625	6.1875	8.9375	6.1875	3.0625
2018-03-08	17:30:00	3.625	3.5625	3.625	1.9375	3.625	1.4375	3.625	3.625	3.625	4.375	3.625	4.75
2018-03-08	18:00:00	1	8.625	1	6.75	1	12.625	1	3.75	1	2.8125	1	3.5
2018-03-08	18:30:00	3.5625	7.375	3.5625	6.9375	3.5625	11.75	3.5625	2.4375	3.5625	2.0625	3.5625	3.75
2018-03-08	19:00:00	3	10.75	3	3.6875	3	2.1875	3	0.1875	3	0.125	3	6
2018-03-08	19:30:00	0.4375	13.1875	0.4375	11.6875	0.4375	7.0625	0.4375	2.3125	0.4375	3.5	0.4375	13.1875
2018-03-08	20:00:00	8.3125	7	8.3125	11.375	8.3125	7.5	8.3125	10.125	8.3125	19.3125	8.3125	12.875
2018-03-08	20:30:00	85.375	80.6875	85.375	74.4375	85.375	72.25	85.375	69.375	85.375	66.0625	85.375	64.25
2018-03-08	21:00:00	48	44.6875	48	35.75	48	28.4375	48	36.4375	48	20.75	48	31.8125
2018-03-08	21:30:00	20.3125	11.1875	20.3125	17.375	20.3125	11.9375	20.3125	19.75	20.3125	7.6875	20.3125	11.3125
2018-03-08	22:00:00	16.125	3.5	16.125	9	16.125	4.625	16.125	8.5625	16.125	13.0625	16.125	12.5
2018-03-08	22:30:00	7.1875	0.1875	7.1875	5.3125	7.1875	4.6875	7.1875	4.375	7.1875	7.4375	7.1875	2
2018-03-08	23:00:00	2.75	0.6875	2.75	2.1875	2.75	4.375	2.75	1.5625	2.75	0.8125	2.75	3.3125
2018-03-08	23:30:00	0.8125	1.1875	0.8125	1.25	0.8125	2.5625	0.8125	2.3125	0.8125	0	0.8125	1.8125
2018-03-09	00:00:00	1.75	5.125	1.75	0	1.75	1.375	1.75	0.25	1.75	1.8125	1.75	0.0625
2018-03-09	00:30:00	2.5	0.1875	2.5	0.1875	2.5	0	2.5	0	2.5	1.5625	2.5	0.625
2018-03-09	01:00:00	0.3125	5	0.3125	2.25	0.3125	0	0.3125	0.625	0.3125	0.4375	0.3125	0
2018-03-09	01:30:00	2.3125	10.625	2.3125	5.1875	2.3125	0.25	2.3125	0	2.3125	0.25	2.3125	2.5625
2018-03-09	02:00:00	7.0625	5.875	7.0625	0	7.0625	1.125	7.0625	4	7.0625	0.0625	7.0625	1.375
2018-03-09	02:30:00	7	5.5	7	3.9375	7	1.625	7	3.5	7	0.0625	7	1.6875
2018-03-09	03:00:00	6.8125	18.5	6.8125	12.75	6.8125	2.4375	6.8125	1.75	6.8125	2.5	6.8125	9.875
2018-03-09	03:30:00	10.4375	26.1875	10.4375	18.9375	10.4375	1.75	10.4375	7.75	10.4375	1.0625	10.4375	11.625
2018-03-09	04:00:00	27.375	31.75	27.375	23.5625	27.375	4.1875	27.375	16.1875	27.375	10.9375	27.375	12.375
2018-03-09	04:30:00	28.75	32.9375	28.75	23.9375	28.75	8.4375	28.75	17.75	28.75	15.8125	28.75	21.3125
2018-03-09	05:00:00	32.125	31.75	32.125	35.125	32.125	14.1875	32.125	19.125	32.125	13.125	32.125	22.375
2018-03-09	05:30:00	37.1875	41	37.1875	33.4375	37.1875	21.625	37.1875	29.625	37.1875	25.625	37.1875	26.75
2018-03-09	06:00:00	49.6875	41.0625	49.6875	41.75	49.6875	28.4375	49.6875	40.625	49.6875	29.8125	49.6875	33.625
2018-03-09	06:30:00	49.75	58.625	49.75	46.8125	49.75	41.5625	49.75	48.1875	49.75	34.6875	49.75	37.125
2018-03-09	07:00:00	53.125	64.0625	53.125	56.75	53.125	40.5625	53.125	46.8125	53.125	43.8125	53.125	52.5
2018-03-09	07:30:00	62.5	69.625	62.5	59.8125	62.5	43.875	62.5	46.125	62.5	46.1875	62.5	43.0625
2018-03-09	08:00:00	61.6875	70.375	61.6875	66.125	61.6875	47.4375	61.6875	54.4375	61.6875	46.125	61.6875	55.5
2018-03-09	08:30:00	44.25	33.9375	44.25	47.5625	44.25	65.5	44.25	41.9375	44.25	50	44.25	47.5625
2018-03-09	09:00:00	7.125	1.125	7.125	8.25	7.125	14	7.125	7.875	7.125	7	7.125	8
2018-03-09	09:30:00	0.3125	0	0.3125	5.9375	0.3125	4.125	0.3125	3.5625	0.3125	2.75	0.3125	2.4375
2018-03-09	10:00:00	4.75	9.8125	4.75	3.5625	4.75	4.8125	4.75	0.75	4.75	3.1875	4.75	1.3125
2018-03-09	10:30:00	1.375	0.75	1.375	1.8125	1.375	0.625	1.375	1	1.375	1.3125	1.375	0.25
2018-03-09	11:00:00	0.4375	0.125	0.4375	3.25	0.4375	3.625	0.4375	0	0.4375	1.1875	0.4375	0.125
2018-03-09	11:30:00	3.75	0.9375	3.75	0	3.75	0.125	3.75	0	3.75	1.5625	3.75	0.875
2018-03-09	12:00:00	0.4375	2.6875	0.4375	18	0.4375	2.0625	0.4375	1.4375	0.4375	1.1875	0.4375	1.5
2018-03-09	12:30:00	2.3125	1	2.3125	0	2.3125	0	2.3125	2.5625	2.3125	0.5625	2.3125	5.4375
2018-03-09	13:00:00	1.875	2	1.875	0	1.875	1.9375	1.875	0	1.875	3.5	1.875	0
2018-03-09	13:30:00	0.4375	4.5	0.4375	0	0.4375	0	0.4375	3.6875	0.4375	1.875	0.4375	1.8125
2018-03-09	14:00:00	0.9375	1.625	0.9375	0.375	0.9375	14	0.9375	6.5625	0.9375	0.5	0.9375	1.5
2018-03-09	14:30:00	0	3.8125	0	0.1875	0	6.6875	0	1.625	0	0.8125	0	1.4375
2018-03-09	15:00:00	0.75	1.875	0.75	0	0.75	5.0625	0.75	0	0.75	1.875	0.75	0.6875
2018-03-09	15:30:00	1.625	2.375	1.625	0.1875	1.625	6.6875	1.625	0	1.625	6.8125	1.625	1.4375
2018-03-09	16:00:00	1.625	2.5625	1.625	0.875	1.625	0.125	1.625	5.9375	1.625	3.5625	1.625	0.5
2018-03-09	16:30:00	0.75	0.125	0.75	0.125	0.75	0.0625	0.75	1	0.75	0.625	0.75	0.5
2018-03-09	17:00:00	2.1875	5.4375	2.1875	4.1875	2.1875	5.6875	2.1875	3.4375	2.1875	2.4375	2.1875	2.1875
2018-03-09	17:30:00	10.125	4.5625	10.125	0	10.125	2.8125	10.125	0.875	10.125	0	10.125	7.1875
2018-03-09	18:00:00	5.4375	8.5625	5.4375	4.25	5.4375	3.9375	5.4375	0.3125	5.4375	8.1875	5.4375	5.3125
2018-03-09	18:30:00	0.875	4	0.875	2.5	0.875	1.5	0.875	3.8125	0.875	0.375	0.875	3.75
2018-03-09	19:00:00	0.875	12.375	0.875	6.875	0.875	9.375	0.875	3.8125	0.875	0	0.875	0.5
2018-03-09	19:30:00	0.4375	12.8125	0.4375	11	0.4375	12.3125	0.4375	5.625	0.4375	10	0.4375	44.4375
2018-03-09	20:00:00	7	2.375	7	4.8125	7	9.5	7	21.3125	7	11.125	7	11.375
2018-03-09	20:30:00	22.6875	3.125	22.6875	5.6875	22.6875	13.25	22.6875	14.25	22.6875	11.3125	22.6875	16.375
2018-03-09	21:00:00	16	8.5	16	4.8125	16	20.25	16	12	16	18.25	16	23.125
2018-03-09	21:30:00	13.6875	20.4375	13.6875	16.875	13.6875	15.875	13.6875	20.625	13.6875	11.5625	13.6875	19.8125
2018-03-09	22:00:00	30.5	22.8125	30.5	10.875	30.5	19.625	30.5	24.25	30.5	14.75	30.5	7.625
2018-03-09	22:30:00	14.5	16.25	14.5	16.0625	14.5	13	14.5	17.125	14.5	17.25	14.5	10.6875
2018-03-09	23:00:00	13	17	13	21.25	13	18.3125	13	18.625	13	5.9375	13	15.375
2018-03-09	23:30:00	12.125	9.875	12.125	15.375	12.125	22.3125	12.125	12.875	12.125	6.1875	12.125	13.6875
2018-03-10	00:00:00	15.9375	21.9375	15.9375	10.75	15.9375	19.125	15.9375	16.625	15.9375	10.375	15.9375	17.8125
2018-03-10	00:30:00	8	12.9375	8	14.75	8	17.1875	8	28.25	8	23	8	17.875
2018-03-10	01:00:00	14.4375	14.625	14.4375	12.8125	14.4375	15.3125	14.4375	7.6875	14.4375	18.8125	14.4375	29
2018-03-10	01:30:00	29.8125	28.4375	29.8125	9.875	29.8125	23.0625	29.8125	16.3125	29.8125	22.625	29.8125	26.125
2018-03-10	02:00:00	17.5	18	17.5	8.9375	17.5	22.1875	17.5	24.5	17.5	25.875	17.5	21.375
2018-03-10	02:30:00	18.8125	15.25	18.8125	12.5	18.8125	26.8125	18.8125	23.6875	18.8125	25.5	18.8125	21.75
2018-03-10	03:00:00	9.8125	11.125	9.8125	22.4375	9.8125	14.1875	9.8125	7.375	9.8125	11.6875	9.8125	35.375
2018-03-10	03:30:00	22.25	14.3125	22.25	16.625	22.25	24.125	22.25	19.125	22.25	21.1875	22.25	27.1875
2018-03-10	04:00:00	19.5625	43.1875	19.5625	21.0625	19.5625	19.0625	19.5625	15.75	19.5625	20.875	19.5625	28.625
2018-03-10	04:30:00	25.375	28.8125	25.375	21.0625	25.375	17.25	25.375	17	25.375	21.5	25.375	23.125
2018-03-10	05:00:00	30.3125	26.0625	30.3125	18.25	30.3125	22.25	30.3125	19.9375	30.3125	22.1875	30.3125	28.1875
2018-03-10	05:30:00	29.6875	40.8125	29.6875	25.125	29.6875	23.875	29.6875	30	29.6875	27.375	29.6875	36.875
2018-03-10	06:00:00	18.75	26.5625	18.75	17.4375	18.75	22.5625	18.75	26.8125	18.75	15.625	18.75	36.875
2018-03-10	06:30:00	13.5	29.8125	13.5	33.0625	13.5	28.1875	13.5	32.125	13.5	11.375	13.5	20.25
2018-03-10	07:00:00	29.625	20.5	29.625	25.75	29.625	14.625	29.625	8.375	29.625	17.375	29.625	19.8125
2018-03-10	07:30:00	16.4375	28.1875	16.4375	17.9375	16.4375	24.1875	16.4375	2.5	16.4375	6.9375	16.4375	4.8125
2018-03-10	08:00:00	8.8125	24.8125	8.8125	18.125	8.8125	19.4375	8.8125	9.375	8.8125	2.4375	8.8125	0.0625
2018-03-10	08:30:00	15.4375	10.1875	15.4375	25.8125	15.4375	21.9375	15.4375	3.3125	15.4375	0.5625	15.4375	5.6875
2018-03-10	09:00:00	10.8125	13.0625	10.8125	24.625	10.8125	22.125	10.8125	4.625	10.8125	2	10.8125	2.0625
2018-03-10	09:30:00	11.25	7.375	11.25	26	11.25	20.5	11.25	3.75	11.25	0	11.25	6.3125
2018-03-10	10:00:00	4.5	0.3125	4.5	15.0625	4.5	13.6875	4.5	6.0625	4.5	1.9375	4.5	0.25
2018-03-10	10:30:00	4.25	0.8125	4.25	12.125	4.25	5.25	4.25	0	4.25	2.4375	4.25	0.1875
2018-03-10	11:00:00	6.3125	3	6.3125	7.75	6.3125	11.6875	6.3125	0.125	6.3125	2.125	6.3125	1.875
2018-03-10	11:30:00	6.125	0.875	6.125	6.3125	6.125	0.625	6.125	0	6.125	2.9375	6.125	3.5625
2018-03-10	12:00:00	2.75	0.8125	2.75	2	2.75	1.5625	2.75	0	2.75	0	2.75	10.4375
2018-03-10	12:30:00	4.3125	1.5	4.3125	0	4.3125	7.75	4.3125	0.9375	4.3125	2.375	4.3125	1.8125
2018-03-10	13:00:00	5.25	0	5.25	0.75	5.25	3.6875	5.25	3.5625	5.25	0.625	5.25	1.9375
2018-03-10	13:30:00	4.375	0.625	4.375	0.25	4.375	5.1875	4.375	0.375	4.375	0.75	4.375	2.6875
2018-03-10	14:00:00	4.9375	0.25	4.9375	0	4.9375	0.6875	4.9375	3.5625	4.9375	3.3125	4.9375	3.1875
2018-03-10	14:30:00	10.5625	0	10.5625	0.1875	10.5625	9.1875	10.5625	2.0625	10.5625	1.125	10.5625	0.4375
2018-03-10	15:00:00	9.875	0.3125	9.875	0	9.875	1.8125	9.875	7.25	9.875	2.1875	9.875	11.0625
2018-03-10	15:30:00	7.5	0.3125	7.5	0.75	7.5	2.0625	7.5	2.25	7.5	0.4375	7.5	2.4375
2018-03-10	16:00:00	8.25	0	8.25	6.1875	8.25	0.25	8.25	0.625	8.25	0.25	8.25	4.1875
2018-03-10	16:30:00	11.75	2.3125	11.75	14.4375	11.75	2.125	11.75	3.875	11.75	0.375	11.75	2.4375
2018-03-10	17:00:00	4.6875	6.875	4.6875	3.4375	4.6875	1.375	4.6875	7.625	4.6875	0.125	4.6875	2.8125
2018-03-10	17:30:00	9.25	9.8125	9.25	4.375	9.25	0	9.25	0.8125	9.25	11.5625	9.25	6
2018-03-10	18:00:00	0.8125	3	0.8125	4.8125	0.8125	0	0.8125	5.6875	0.8125	7.875	0.8125	12.75
2018-03-10	18:30:00	2.3125	0.6875	2.3125	2.0625	2.3125	4.8125	2.3125	10.9375	2.3125	15.3125	2.3125	11.4375
2018-03-10	19:00:00	10.0625	2.875	10.0625	5.3125	10.0625	18.4375	10.0625	16.625	10.0625	15.75	10.0625	13.1875
2018-03-10	19:30:00	7.5625	1.0625	7.5625	0.875	7.5625	6.9375	7.5625	8.1875	7.5625	6.75	7.5625	17.625
2018-03-10	20:00:00	9.875	4.0625	9.875	3.125	9.875	3.25	9.875	13.5	9.875	10.6875	9.875	14.9375
2018-03-10	20:30:00	16	9.625	16	1.9375	16	3.75	16	23.9375	16	15.125	16	5.125
2018-03-10	21:00:00	8.1875	8.8125	8.1875	11.4375	8.1875	6	8.1875	5.8125	8.1875	12.625	8.1875	21
2018-03-10	21:30:00	12.3125	13.875	12.3125	11.375	12.3125	15.75	12.3125	11.5625	12.3125	13.4375	12.3125	14.3125
2018-03-10	22:00:00	21.9375	15	21.9375	5.5625	21.9375	7.875	21.9375	14.875	21.9375	16.4375	21.9375	21.1875
2018-03-10	22:30:00	19.5	19.6875	19.5	12.875	19.5	18.0625	19.5	19.8125	19.5	19.3125	19.5	24.875
2018-03-10	23:00:00	5.75	9.3125	5.75	11.75	5.75	16.375	5.75	7.8125	5.75	14.25	5.75	20.5625
2018-03-10	23:30:00	5.375	15.5625	5.375	18.9375	5.375	10.625	5.375	14.4375	5.375	12.875	5.375	18.875
2018-03-11	00:00:00	18.4375	18.375	18.4375	21.125	18.4375	18.1875	18.4375	28	18.4375	12.625	18.4375	26.125
2018-03-11	00:30:00	13.75	18.9375	13.75	18.8125	13.75	15.0625	13.75	25.625	13.75	24.25	13.75	14.9375
2018-03-11	01:00:00	19.4375	20.75	19.4375	16.75	19.4375	18.8125	19.4375	24.0625	19.4375	25.5625	19.4375	21.3125
2018-03-11	01:30:00	19.5625	21.9375	19.5625	18.375	19.5625	19.8125	19.5625	17.375	19.5625	14.75	19.5625	28.3125
2018-03-11	02:00:00	15.5625	24	15.5625	20.0625	15.5625	17.375	15.5625	29.625	15.5625	25	15.5625	27.9375
2018-03-11	02:30:00	19.75	16.5	19.75	21.3125	19.75	21.25	19.75	19.6875	19.75	21	19.75	25.4375
2018-03-11	03:00:00	14.9375	19.5625	14.9375	26.5	14.9375	21.75	14.9375	17.4375	14.9375	17.5625	14.9375	22.75
2018-03-11	03:30:00	24.8125	19.5	24.8125	19.5625	24.8125	17	24.8125	23.625	24.8125	34.25	24.8125	22.625
2018-03-11	04:00:00	10.125	21.75	10.125	17.125	10.125	29.25	10.125	33.8125	10.125	21.875	10.125	23.25
2018-03-11	04:30:00	16.125	32.1875	16.125	25.9375	16.125	23.75	16.125	24.9375	16.125	7.5	16.125	18.1875
2018-03-11	05:00:00	21.25	26.25	21.25	17.9375	21.25	18.875	21.25	19.4375	21.25	2.8125	21.25	23.9375
2018-03-11	05:30:00	7.25	32.8125	7.25	30.0625	7.25	17.3125	7.25	11.125	7.25	18.5	7.25	20.625
2018-03-11	06:00:00	16.25	34.6875	16.25	20.875	16.25	21.1875	16.25	12.6875	16.25	8.9375	16.25	15.4375
2018-03-11	06:30:00	11.4375	20.375	11.4375	27.8125	11.4375	22.3125	11.4375	1.6875	11.4375	5.0625	11.4375	9.6875
2018-03-11	07:00:00	7.5625	27.375	7.5625	19.75	7.5625	29.25	7.5625	0.8125	7.5625	3.875	7.5625	7.0625
2018-03-11	07:30:00	1.75	20.6875	1.75	22.125	1.75	28.3125	1.75	5.875	1.75	0.375	1.75	6.1875
2018-03-11	08:00:00	0.75	16.4375	0.75	15.875	0.75	14	0.75	1.5	0.75	0	0.75	4
2018-03-11	08:30:00	3.3125	8.25	3.3125	14.9375	3.3125	28	3.3125	5.0625	3.3125	0.0625	3.3125	0
2018-03-11	09:00:00	5.5625	12.5625	5.5625	14.875	5.5625	13.1875	5.5625	5.4375	5.5625	0.25	5.5625	0.3125
2018-03-11	09:30:00	3.875	2.0625	3.875	10.625	3.875	13.3125	3.875	1.9375	3.875	2.125	3.875	0
2018-03-11	10:00:00	4.0625	0	4.0625	9.5	4.0625	9.75	4.0625	4.625	4.0625	2.1875	4.0625	0.3125
2018-03-11	10:30:00	1.75	2.5625	1.75	2.9375	1.75	4	1.75	4.25	1.75	3.1875	1.75	0.1875
2018-03-11	11:00:00	6.6875	1.875	6.6875	0.1875	6.6875	2.25	6.6875	1.75	6.6875	1.5	6.6875	2.5625
2018-03-11	11:30:00	0	9.125	0	1.5	0	1.4375	0	3.5625	0	9.4375	0	5.8125
2018-03-11	12:00:00	0.8125	3.25	0.8125	0	0.8125	2.5	0.8125	12.25	0.8125	0.3125	0.8125	1.0625
2018-03-11	12:30:00	1.375	0.25	1.375	2.25	1.375	5.4375	1.375	2.625	1.375	1.3125	1.375	2.25
2018-03-11	13:00:00	1.4375	4.0625	1.4375	7.8125	1.4375	4.375	1.4375	0.75	1.4375	0.25	1.4375	0.375
2018-03-11	13:30:00	2.1875	1.625	2.1875	3.875	2.1875	7.25	2.1875	0.8125	2.1875	9.375	2.1875	3.875
2018-03-11	14:00:00	2.4375	0.375	2.4375	0.25	2.4375	3.875	2.4375	2.25	2.4375	2.875	2.4375	1
2018-03-11	14:30:00	0.1875	6.75	0.1875	0.625	0.1875	5.875	0.1875	4.8125	0.1875	2.625	0.1875	3.25
2018-03-11	15:00:00	0.0625	5.9375	0.0625	2.3125	0.0625	0.3125	0.0625	4.5625	0.0625	2.6875	0.0625	6
2018-03-11	15:30:00	1	0.375	1	0.0625	1	0.125	1	4.9375	1	2.8125	1	3.9375
2018-03-11	16:00:00	6.3125	4.875	6.3125	0.0625	6.3125	0.0625	6.3125	1.4375	6.3125	3.4375	6.3125	5.375
2018-03-11	16:30:00	7.9375	4.1875	7.9375	0.375	7.9375	0	7.9375	14.3125	7.9375	10.0625	7.9375	5.1875
2018-03-11	17:00:00	5.75	0.625	5.75	0.25	5.75	2.375	5.75	14.4375	5.75	2.9375	5.75	4.625
2018-03-11	17:30:00	2.9375	6.3125	2.9375	1.1875	2.9375	4.0625	2.9375	10.4375	2.9375	7.1875	2.9375	5.5625
2018-03-11	18:00:00	4.1875	6.375	4.1875	3.8125	4.1875	4.375	4.1875	8	4.1875	12.75	4.1875	9.0625
2018-03-11	18:30:00	7.75	0.0625	7.75	8.4375	7.75	12.3125	7.75	23.4375	7.75	20.5625	7.75	24
2018-03-11	19:00:00	7.5625	0.625	7.5625	6	7.5625	7.875	7.5625	20.125	7.5625	15.6875	7.5625	19.4375
2018-03-11	19:30:00	15.5	1.875	15.5	2.1875	15.5	8.5625	15.5	15.125	15.5	9.125	15.5	16.875
2018-03-11	20:00:00	4.6875	7	4.6875	5.75	4.6875	9.9375	4.6875	9.25	4.6875	7.8125	4.6875	14.625
2018-03-11	20:30:00	10.5	17.8125	10.5	1.9375	10.5	12.5	10.5	32.3125	10.5	15.4375	10.5	16.125
2018-03-11	21:00:00	16	14.375	16	4.625	16	13.1875	16	18.0625	16	11.875	16	18.875
2018-03-11	21:30:00	18	12.375	18	15.625	18	20.875	18	16.6875	18	9.5625	18	11.125
2018-03-11	22:00:00	13.625	11.4375	13.625	18.625	13.625	8.625	13.625	15.1875	13.625	10.875	13.625	20.1875
2018-03-11	22:30:00	12.5	10.5	12.5	17.625	12.5	6.875	12.5	17.6875	12.5	18.75	12.5	16.75
2018-03-11	23:00:00	13.5	17.875	13.5	8.25	13.5	22.375	13.5	13.6875	13.5	15.9375	13.5	12.125
2018-03-11	23:30:00	24	21.8125	24	13.125	24	12.1875	24	21.125	24	11.5	24	23.8125
2018-03-12	00:00:00	15	20.625	15	17.8125	15	18.375	15	16.9375	15	25.8125	15	25.8125
2018-03-12	00:30:00	16.375	16.6875	16.375	17.5	16.375	20.8125	16.375	16.6875	16.375	16.3125	16.375	26.875
2018-03-12	01:00:00	16.3125	20.9375	16.3125	28.875	16.3125	27.8125	16.3125	19.1875	16.3125	30.5	16.3125	40.75
2018-03-12	01:30:00	17.8125	29.9375	17.8125	29.3125	17.8125	22.5625	17.8125	35.5625	17.8125	29.625	17.8125	39.75
2018-03-12	02:00:00	23.75	19.6875	23.75	13	23.75	10.8125	23.75	20.8125	23.75	20.5	23.75	29.1875
2018-03-12	02:30:00	17.1875	26.375	17.1875	15.9375	17.1875	15.4375	17.1875	16.125	17.1875	10	17.1875	20.3125
2018-03-12	03:00:00	18.625	32.8125	18.625	16.5	18.625	17.375	18.625	19.625	18.625	13.6875	18.625	29.25
2018-03-12	03:30:00	24.3125	20.5625	24.3125	24.25	24.3125	24.75	24.3125	21.875	24.3125	16.0625	24.3125	21.625
2018-03-12	04:00:00	19	28.1875	19	26.3125	19	12.375	19	16.375	19	12.4375	19	22.5
2018-03-12	04:30:00	23.75	24.375	23.75	28.125	23.75	29.4375	23.75	9.9375	23.75	9.8125	23.75	22.0625
2018-03-12	05:00:00	8.3125	18.0625	8.3125	19.5625	8.3125	21.8125	8.3125	7.75	8.3125	4.5	8.3125	18.1875
2018-03-12	05:30:00	16.875	19.5	16.875	27.0625	16.875	25.125	16.875	4.875	16.875	4.125	16.875	9.8125
2018-03-12	06:00:00	9.75	27.0625	9.75	31.1875	9.75	28.625	9.75	7.1875	9.75	1.25	9.75	5.4375
2018-03-12	06:30:00	4.875	15.9375	4.875	28.125	4.875	33.5625	4.875	8.375	4.875	1.9375	4.875	8
2018-03-12	07:00:00	0.125	11.5625	0.125	22	0.125	35.125	0.125	7	0.125	2.875	0.125	5.3125
2018-03-12	07:30:00	2.3125	9.1875	2.3125	14.9375	2.3125	28.125	2.3125	1.9375	2.3125	0.625	2.3125	3.125
2018-03-12	08:00:00	0	11.8125	0	10.875	0	19.0625	0	0.8125	0	0.375	0	6.625
2018-03-12	08:30:00	2.75	3.1875	2.75	9.125	2.75	9	2.75	7.8125	2.75	0	2.75	5.625
2018-03-12	09:00:00	1.125	2.4375	1.125	8.0625	1.125	4	1.125	1.25	1.125	0	1.125	3.4375
2018-03-12	09:30:00	3.0625	3.0625	3.0625	4.125	3.0625	5.125	3.0625	7.6875	3.0625	1.1875	3.0625	0.0625
2018-03-12	10:00:00	1	4.375	1	0.1875	1	2.75	1	4.5	1	2.4375	1	3.5
2018-03-12	10:30:00	3.625	3.5625	3.625	2.875	3.625	4.9375	3.625	9.375	3.625	3.5625	3.625	11.1875
2018-03-12	11:00:00	4.1875	4.75	4.1875	5.625	4.1875	3.1875	4.1875	0.1875	4.1875	5.4375	4.1875	3.1875
2018-03-12	11:30:00	2.4375	3.4375	2.4375	3.5	2.4375	2.4375	2.4375	1	2.4375	4.375	2.4375	3.875
2018-03-12	12:00:00	1.8125	2.5	1.8125	4.3125	1.8125	0.5	1.8125	1.75	1.8125	0.875	1.8125	0
2018-03-12	12:30:00	1.0625	1.125	1.0625	4.875	1.0625	0.125	1.0625	0.5625	1.0625	1.5625	1.0625	2.625
2018-03-12	13:00:00	3.0625	0	3.0625	3.4375	3.0625	1.1875	3.0625	6.375	3.0625	2.9375	3.0625	0.5625
2018-03-12	13:30:00	2.3125	0	2.3125	1.5	2.3125	0.1875	2.3125	7.4375	2.3125	1.25	2.3125	10.5625
2018-03-12	14:00:00	4.625	0	4.625	4.5625	4.625	0.8125	4.625	0.5625	4.625	2.8125	4.625	3.875
2018-03-12	14:30:00	5.375	2.9375	5.375	7.875	5.375	0	5.375	0.875	5.375	0	5.375	7.125
2018-03-12	15:00:00	5.9375	3.5625	5.9375	0.125	5.9375	2.25	5.9375	6.1875	5.9375	3.75	5.9375	2.875
2018-03-12	15:30:00	0.5	2.75	0.5	1.1875	0.5	2.625	0.5	1.75	0.5	1.75	0.5	1.75
2018-03-12	16:00:00	1.125	5.5	1.125	5.5625	1.125	0	1.125	12.0625	1.125	5.3125	1.125	6
2018-03-12	16:30:00	6.375	1.75	6.375	2.6875	6.375	4.125	6.375	15.6875	6.375	2.5625	6.375	15.8125
2018-03-12	17:00:00	5.75	3.125	5.75	0.25	5.75	7.25	5.75	10.5625	5.75	16.8125	5.75	18.5625
2018-03-12	17:30:00	1.375	3.0625	1.375	4.25	1.375	9.1875	1.375	18.75	1.375	19.0625	1.375	21.125
2018-03-12	18:00:00	5.875	1.8125	5.875	5.3125	5.875	3.25	5.875	4.25	5.875	17.8125	5.875	12.3125
2018-03-12	18:30:00	6.8125	4.875	6.8125	1.125	6.8125	5.5	6.8125	8.375	6.8125	4.25	6.8125	9.5
2018-03-12	19:00:00	15.375	6.375	15.375	2.125	15.375	7.9375	15.375	23.1875	15.375	10.1875	15.375	14.6875
2018-03-12	19:30:00	11.25	3.875	11.25	8.4375	11.25	18.8125	11.25	17.9375	11.25	17.1875	11.25	18.625
2018-03-12	20:00:00	17.8125	12.3125	17.8125	9.375	17.8125	6.125	17.8125	24.1875	17.8125	9.6875	17.8125	14.625
2018-03-12	20:30:00	14.25	17.75	14.25	9.0625	14.25	8.1875	14.25	16.25	14.25	12.9375	14.25	14.1875
2018-03-12	21:00:00	13.625	11.6875	13.625	10.375	13.625	12.8125	13.625	14.75	13.625	15	13.625	19.625
2018-03-12	21:30:00	14.1875	14.4375	14.1875	14.9375	14.1875	14.3125	14.1875	15.5	14.1875	19.0625	14.1875	21.9375
2018-03-12	22:00:00	14.0625	10.1875	14.0625	13.3125	14.0625	22.25	14.0625	16.1875	14.0625	24.375	14.0625	18.25
2018-03-12	22:30:00	11.9375	16.8125	11.9375	12.8125	11.9375	13.125	11.9375	28.9375	11.9375	18.4375	11.9375	17.1875
2018-03-12	23:00:00	11.1875	17.875	11.1875	9.3125	11.1875	17.25	11.1875	23.75	11.1875	10.625	11.1875	23.5
2018-03-12	23:30:00	9.875	13.6875	9.875	14.8125	9.875	7.3125	9.875	24.1875	9.875	27.25	9.875	26
2018-03-13	00:00:00	22.25	9.4375	22.25	25.625	22.25	17.75	22.25	19.5625	22.25	25	22.25	25.4375
2018-03-13	00:30:00	21.9375	29.0625	21.9375	23.1875	21.9375	17.3125	21.9375	25	21.9375	22.5	21.9375	27.375
2018-03-13	01:00:00	18.25	35.0625	18.25	12.5	18.25	20.8125	18.25	24.25	18.25	20.5625	18.25	31.125
2018-03-13	01:30:00	12.6875	23.375	12.6875	21.3125	12.6875	23.1875	12.6875	23.5625	12.6875	13.4375	12.6875	26.8125
2018-03-13	02:00:00	19.6875	18.5625	19.6875	19.6875	19.6875	22.8125	19.6875	16.8125	19.6875	21.3125	19.6875	27.625
2018-03-13	02:30:00	11.875	18.1875	11.875	19.6875	11.875	23	11.875	18.1875	11.875	17.8125	11.875	26.5625
2018-03-13	03:00:00	16.875	25.25	16.875	24.1875	16.875	12.3125	16.875	6.375	16.875	9.75	16.875	28.1875
2018-03-13	03:30:00	16	17.6875	16	19.75	16	30.4375	16	4	16	10	16	20.0625
2018-03-13	04:00:00	5.5	31.3125	5.5	29	5.5	29.875	5.5	8.3125	5.5	0.75	5.5	20.375
2018-03-13	04:30:00	8.4375	29.125	8.4375	21.5625	8.4375	20.625	8.4375	6.3125	8.4375	0.0625	8.4375	17.8125
2018-03-13	05:00:00	7.5	23.625	7.5	27.6875	7.5	22.75	7.5	2.25	7.5	2.6875	7.5	12
2018-03-13	05:30:00	7.6875	15.6875	7.6875	18.0625	7.6875	24.5625	7.6875	9.0625	7.6875	2.6875	7.6875	12
2018-03-13	06:00:00	1.1875	8.125	1.1875	16.4375	1.1875	20.875	1.1875	5	1.1875	0.25	1.1875	5.3125
2018-03-13	06:30:00	1.125	7.4375	1.125	25.375	1.125	14.875	1.125	6.25	1.125	6.4375	1.125	1.6875
2018-03-13	07:00:00	0.3125	8.3125	0.3125	17.25	0.3125	15.5625	0.3125	4.75	0.3125	3.4375	0.3125	3.5
2018-03-13	07:30:00	1.125	8.6875	1.125	12.1875	1.125	14.3125	1.125	0.4375	1.125	2.125	1.125	1
2018-03-13	08:00:00	7	1.75	7	6.1875	7	11.9375	7	0	7	3.25	7	3.5
2018-03-13	08:30:00	0.3125	2.8125	0.3125	10.125	0.3125	4.125	0.3125	0.4375	0.3125	6.5	0.3125	3.25
2018-03-13	09:00:00	0.3125	9.25	0.3125	3.5	0.3125	7	0.3125	0.25	0.3125	0.9375	0.3125	4.0625
2018-03-13	09:30:00	9.1875	5.1875	9.1875	1.875	9.1875	8.1875	9.1875	12.0625	9.1875	0.25	9.1875	0.5625
2018-03-13	10:00:00	14.3125	0.4375	14.3125	3.1875	14.3125	8.875	14.3125	7.3125	14.3125	0	14.3125	2.0625
2018-03-13	10:30:00	7.75	2.6875	7.75	2.5	7.75	10.375	7.75	2.875	7.75	0	7.75	3.75
2018-03-13	11:00:00	1.625	2.5625	1.625	1.125	1.625	8.5	1.625	3.8125	1.625	0.25	1.625	0
2018-03-13	11:30:00	0.0625	2.5625	0.0625	2.8125	0.0625	9.3125	0.0625	7.5625	0.0625	8.75	0.0625	1.25
2018-03-13	12:00:00	2.6875	1.9375	2.6875	0	2.6875	3.0625	2.6875	3.1875	2.6875	0.125	2.6875	7.1875
2018-03-13	12:30:00	3	4.25	3	3.625	3	6.4375	3	4.125	3	0.75	3	0.5
2018-03-13	13:00:00	0.0625	5.8125	0.0625	3.625	0.0625	9.3125	0.0625	2.0625	0.0625	0.1875	0.0625	0
2018-03-13	13:30:00	1.1875	1.5625	1.1875	2.9375	1.1875	6.5	1.1875	0.75	1.1875	3.875	1.1875	5.3125
2018-03-13	14:00:00	0.3125	3.125	0.3125	4.1875	0.3125	4.8125	0.3125	3.25	0.3125	4.8125	0.3125	13.625
2018-03-13	14:30:00	1.9375	3.0625	1.9375	2.25	1.9375	0.1875	1.9375	3.6875	1.9375	3.8125	1.9375	6.6875
2018-03-13	15:00:00	0	0.875	0	3.5	0	2.25	0	4.125	0	2.9375	0	2.6875
2018-03-13	15:30:00	4.1875	0.5625	4.1875	1.75	4.1875	3.0625	4.1875	8.9375	4.1875	11.4375	4.1875	6.3125
2018-03-13	16:00:00	5.25	1.375	5.25	4.75	5.25	1.5625	5.25	14.4375	5.25	11.4375	5.25	6.875
2018-03-13	16:30:00	4.9375	0.625	4.9375	4.5625	4.9375	0.625	4.9375	14.75	4.9375	13.5	4.9375	15.25
2018-03-13	17:00:00	11.0625	0.4375	11.0625	1.1875	11.0625	11.875	11.0625	11.25	11.0625	21	11.0625	13.3125
2018-03-13	17:30:00	5.125	9.5	5.125	3.875	5.125	9.5	5.125	15.625	5.125	9.75	5.125	14.5
2018-03-13	18:00:00	8	12.0625	8	12.1875	8	10.0625	8	31.25	8	6.0625	8	17.125
2018-03-13	18:30:00	17.1875	5.875	17.1875	6.4375	17.1875	2.3125	17.1875	17.5625	17.1875	13.5	17.1875	15.5
2018-03-13	19:00:00	11.5	9.5	11.5	10.5	11.5	4.5625	11.5	8.4375	11.5	9.875	11.5	9.1875
2018-03-13	19:30:00	12.8125	11.625	12.8125	1.5625	12.8125	11.625	12.8125	13.8125	12.8125	14.8125	12.8125	13
2018-03-13	20:00:00	18.25	15.8125	18.25	4.625	18.25	16.3125	18.25	14.5625	18.25	18.625	18.25	13
2018-03-13	20:30:00	7.9375	17.625	7.9375	11.5625	7.9375	9	7.9375	5.0625	7.9375	8.9375	7.9375	17.875
2018-03-13	21:00:00	10.6875	6.5625	10.6875	15.9375	10.6875	14.9375	10.6875	18.0625	10.6875	21.8125	10.6875	15
2018-03-13	21:30:00	7.8125	23.875	7.8125	17.75	7.8125	18.625	7.8125	22.625	7.8125	21.25	7.8125	17.0625
2018-03-13	22:00:00	29.6875	11.5625	29.6875	12.875	29.6875	12.4375	29.6875	13.875	29.6875	13.625	29.6875	20.0625
2018-03-13	22:30:00	20.5	14.3125	20.5	16.0625	20.5	8.8125	20.5	19.875	20.5	25.4375	20.5	22.8125
2018-03-13	23:00:00	11.9375	22.75	11.9375	22.375	11.9375	15.5	11.9375	18.0625	11.9375	22.0625	11.9375	23.1875
2018-03-13	23:30:00	10.5625	10.6875	10.5625	27.0625	10.5625	17.25	10.5625	20	10.5625	24.375	10.5625	21.4375
2018-03-14	00:00:00	21.125	13.5625	21.125	19.125	21.125	25.75	21.125	21.5	21.125	16.9375	21.125	20.1875
2018-03-14	00:30:00	18.3125	16.9375	18.3125	16.8125	18.3125	19.125	18.3125	21.875	18.3125	9	18.3125	23.625
2018-03-14	01:00:00	20.6875	23.1875	20.6875	15.3125	20.6875	20.875	20.6875	15.1875	20.6875	11.625	20.6875	17.3125
2018-03-14	01:30:00	20.875	25.6875	20.875	18.8125	20.875	10.75	20.875	13.75	20.875	17.5625	20.875	20.375
2018-03-14	02:00:00	19.3125	38.8125	19.3125	19.75	19.3125	8.6875	19.3125	9.25	19.3125	8.6875	19.3125	20.125
2018-03-14	02:30:00	13.6875	27.8125	13.6875	24.875	13.6875	21.125	13.6875	19.125	13.6875	13.3125	13.6875	17.875
2018-03-14	03:00:00	7.375	14.3125	7.375	29	7.375	29.1875	7.375	8.375	7.375	2.4375	7.375	11.25
2018-03-14	03:30:00	5.125	18.375	5.125	22.3125	5.125	24.3125	5.125	5.0625	5.125	8.0625	5.125	13.1875
2018-03-14	04:00:00	4.9375	28.9375	4.9375	25.375	4.9375	14	4.9375	2.875	4.9375	9.875	4.9375	9.3125
2018-03-14	04:30:00	10.75	10.25	10.75	21.875	10.75	18.625	10.75	6.875	10.75	3.5625	10.75	9.6875
2018-03-14	05:00:00	4.25	9.125	4.25	17.6875	4.25	17.625	4.25	1.875	4.25	3.9375	4.25	6.1875
2018-03-14	05:30:00	7.0625	12	7.0625	12.25	7.0625	17.5625	7.0625	7.0625	7.0625	3.4375	7.0625	7.1875
2018-03-14	06:00:00	4.5625	10.0625	4.5625	15.1875	4.5625	11.8125	4.5625	5.0625	4.5625	2	4.5625	8.125
2018-03-14	06:30:00	3.6875	2.5	3.6875	15.1875	3.6875	6.125	3.6875	0.3125	3.6875	3.625	3.6875	4.9375
2018-03-14	07:00:00	3.4375	0.5	3.4375	11.875	3.4375	8	3.4375	5.75	3.4375	4.25	3.4375	2.9375
2018-03-14	07:30:00	2.875	1.3125	2.875	11.375	2.875	1.6875	2.875	0.0625	2.875	3.25	2.875	6.4375
2018-03-14	08:00:00	3	7.5	3	6.0625	3	3.9375	3	2.8125	3	1.6875	3	4.875
2018-03-14	08:30:00	4.5625	6.3125	4.5625	5.5	4.5625	4.9375	4.5625	0	4.5625	1.4375	4.5625	3.375
2018-03-14	09:00:00	5.125	7.9375	5.125	3.1875	5.125	3.25	5.125	0	5.125	2.875	5.125	3.25
2018-03-14	09:30:00	6.1875	5.75	6.1875	12.125	6.1875	2	6.1875	4	6.1875	0.0625	6.1875	2.75
2018-03-14	10:00:00	0	1.1875	0	8.875	0	1.0625	0	4.25	0	0.3125	0	0.1875
2018-03-14	10:30:00	6.125	0.1875	6.125	2.5625	6.125	0	6.125	2.375	6.125	0.75	6.125	2.8125
2018-03-14	11:00:00	0.5	1.125	0.5	3.9375	0.5	1.875	0.5	2.5625	0.5	3.3125	0.5	3.5
2018-03-14	11:30:00	3.75	0	3.75	4	3.75	4.1875	3.75	4.125	3.75	2.75	3.75	4.9375
2018-03-14	12:00:00	11.625	0.625	11.625	2.5625	11.625	0.125	11.625	2.9375	11.625	1.4375	11.625	5.875
2018-03-14	12:30:00	8.5	9	8.5	3.6875	8.5	7.1875	8.5	0.375	8.5	0.6875	8.5	3.4375
2018-03-14	13:00:00	10.0625	2.125	10.0625	2.5	10.0625	4.6875	10.0625	6.25	10.0625	8	10.0625	14.6875
2018-03-14	13:30:00	1.6875	3.4375	1.6875	1.625	1.6875	3.1875	1.6875	8.8125	1.6875	1.0625	1.6875	6.875
2018-03-14	14:00:00	2.375	8.5625	2.375	2.1875	2.375	4.125	2.375	4.625	2.375	1.25	2.375	6.5625
2018-03-14	14:30:00	5.375	3.9375	5.375	8.0625	5.375	0.5	5.375	15.1875	5.375	7.125	5.375	10.4375
2018-03-14	15:00:00	6.4375	8.6875	6.4375	5.1875	6.4375	0.125	6.4375	16.875	6.4375	5.6875	6.4375	7.8125
2018-03-14	15:30:00	8.375	3.4375	8.375	7.6875	8.375	8.375	8.375	19.6875	8.375	10.3125	8.375	9.25
2018-03-14	16:00:00	6.75	5.75	6.75	5.4375	6.75	5.9375	6.75	7.9375	6.75	8.5	6.75	6.4375
2018-03-14	16:30:00	10.875	8.6875	10.875	10.75	10.875	8.625	10.875	9.4375	10.875	15	10.875	11.4375
2018-03-14	17:00:00	0.6875	7.8125	0.6875	3.9375	0.6875	6	0.6875	20.5	0.6875	10.1875	0.6875	11.625
2018-03-14	17:30:00	2	9.25	2	1.625	2	21.0625	2	11.4375	2	19.25	2	18.625
2018-03-14	18:00:00	15.875	9.375	15.875	13.125	15.875	9.3125	15.875	8.3125	15.875	14.25	15.875	9
2018-03-14	18:30:00	26.25	7.875	26.25	10.6875	26.25	10.25	26.25	22	26.25	10.9375	26.25	16.125
2018-03-14	19:00:00	16.5	13.5	16.5	7.5625	16.5	4.1875	16.5	23.875	16.5	10.5625	16.5	10.375
2018-03-14	19:30:00	18.6875	16	18.6875	8.6875	18.6875	4.625	18.6875	14.375	18.6875	24.0625	18.6875	12.4375
2018-03-14	20:00:00	18.5	5	18.5	21	18.5	6.5	18.5	27.8125	18.5	20	18.5	16.25
2018-03-14	20:30:00	11.8125	11	11.8125	12.9375	11.8125	12.4375	11.8125	16.5	11.8125	12.375	11.8125	17.75
2018-03-14	21:00:00	12.6875	16.625	12.6875	8.3125	12.6875	13.25	12.6875	15	12.6875	13.5	12.6875	19.25
2018-03-14	21:30:00	16.875	25.9375	16.875	19.625	16.875	10.8125	16.875	21.25	16.875	25.25	16.875	20
2018-03-14	22:00:00	19.625	24.375	19.625	13.375	19.625	10.5625	19.625	12.5	19.625	13.625	19.625	29.4375
2018-03-14	22:30:00	15	16.6875	15	12.8125	15	12	15	15.25	15	24.5	15	17.3125
2018-03-14	23:00:00	21.1875	12.9375	21.1875	14.9375	21.1875	20.1875	21.1875	21.75	21.1875	15	21.1875	22.375
2018-03-14	23:30:00	16.25	23.125	16.25	23.625	16.25	12	16.25	14.625	16.25	17.8125	16.25	33.5
2018-03-15	00:00:00	24.375	34.875	24.375	14.3125	24.375	10.375	24.375	8.5625	24.375	8.125	24.375	23.3125
2018-03-15	00:30:00	11.75	26.8125	11.75	17.6875	11.75	19.5	11.75	13.25	11.75	11.8125	11.75	21.1875
2018-03-15	01:00:00	16.3125	23.0625	16.3125	23.3125	16.3125	19.5625	16.3125	12.6875	16.3125	7.1875	16.3125	20
2018-03-15	01:30:00	21.5625	29.3125	21.5625	20.6875	21.5625	18.5625	21.5625	6.625	21.5625	4.375	21.5625	12.75
2018-03-15	02:00:00	16	23.375	16	16.75	16	18	16	8.1875	16	2.3125	16	16.4375
2018-03-15	02:30:00	6.6875	26.4375	6.6875	17.75	6.6875	16.875	6.6875	5.0625	6.6875	1.6875	6.6875	12.6875
2018-03-15	03:00:00	3.9375	36.375	3.9375	9.375	3.9375	16.875	3.9375	12.8125	3.9375	9.125	3.9375	11.375
2018-03-15	03:30:00	14.125	19.3125	14.125	9.75	14.125	19.4375	14.125	13.5	14.125	0.5	14.125	12.3125
2018-03-15	04:00:00	3.3125	13.3125	3.3125	6.3125	3.3125	13.6875	3.3125	9.75	3.3125	2.125	3.3125	7.1875
2018-03-15	04:30:00	2.0625	12.4375	2.0625	14.875	2.0625	23.6875	2.0625	7.1875	2.0625	2.8125	2.0625	5.75
2018-03-15	05:00:00	2.4375	18.625	2.4375	9.0625	2.4375	8.25	2.4375	0	2.4375	8.5	2.4375	9.625
2018-03-15	05:30:00	7.4375	5.9375	7.4375	6.375	7.4375	12	7.4375	3.8125	7.4375	1	7.4375	7.1875
2018-03-15	06:00:00	3.8125	5.875	3.8125	6.5625	3.8125	10.5625	3.8125	8.3125	3.8125	2.0625	3.8125	6.5
2018-03-15	06:30:00	0.1875	8.4375	0.1875	4.4375	0.1875	6.5625	0.1875	6.875	0.1875	3.25	0.1875	10.625
2018-03-15	07:00:00	0.5	9.875	0.5	3.625	0.5	6.75	0.5	0.625	0.5	2.5625	0.5	7.75
2018-03-15	07:30:00	0.9375	15.375	0.9375	3.5	0.9375	2.6875	0.9375	1.9375	0.9375	0	0.9375	3.9375
2018-03-15	08:00:00	2.875	9.25	2.875	4.75	2.875	4.375	2.875	2.625	2.875	4.8125	2.875	8.4375
2018-03-15	08:30:00	6.875	7	6.875	1.375	6.875	3.4375	6.875	0	6.875	3.0625	6.875	6.1875
2018-03-15	09:00:00	0	5.8125	0	1.8125	0	6.0625	0	8.9375	0	1.5	0	1.6875
2018-03-15	09:30:00	0.25	8.6875	0.25	4.25	0.25	5.1875	0.25	7.5	0.25	3	0.25	9.625
2018-03-15	10:00:00	0.1875	8.9375	0.1875	4.6875	0.1875	3.25	0.1875	12.75	0.1875	0	0.1875	7.1875
2018-03-15	10:30:00	4.9375	10.6875	4.9375	2.25	4.9375	4.375	4.9375	0.125	4.9375	0	4.9375	2.5625
2018-03-15	11:00:00	5.75	11.1875	5.75	4.0625	5.75	12.375	5.75	5.625	5.75	4.625	5.75	7.3125
2018-03-15	11:30:00	4.9375	9.9375	4.9375	6.4375	4.9375	3.4375	4.9375	3.125	4.9375	2.125	4.9375	2.625
2018-03-15	12:00:00	0.1875	10.5625	0.1875	4.5625	0.1875	0.8125	0.1875	9.1875	0.1875	5.5625	0.1875	9.5625
2018-03-15	12:30:00	3.6875	8.1875	3.6875	7.625	3.6875	2.625	3.6875	3.25	3.6875	1	3.6875	8.5625
2018-03-15	13:00:00	2.0625	10.0625	2.0625	6.8125	2.0625	0.25	2.0625	10.125	2.0625	3.4375	2.0625	7.9375
2018-03-15	13:30:00	6.125	6.4375	6.125	5.625	6.125	1.4375	6.125	7.75	6.125	5.625	6.125	3.5
2018-03-15	14:00:00	1.625	3.5625	1.625	5.625	1.625	2.8125	1.625	15.25	1.625	2.875	1.625	4.6875
2018-03-15	14:30:00	4.375	8.5	4.375	9.625	4.375	4.4375	4.375	4.0625	4.375	16.0625	4.375	9.9375
2018-03-15	15:00:00	7.25	8.5	7.25	4.1875	7.25	4.1875	7.25	3	7.25	7.5	7.25	5.5
2018-03-15	15:30:00	2.5	7.4375	2.5	5.25	2.5	8.5	2.5	13.625	2.5	13.1875	2.5	17.375
2018-03-15	16:00:00	6.0625	7.25	6.0625	18.1875	6.0625	4.3125	6.0625	26.9375	6.0625	7.75	6.0625	16
2018-03-15	16:30:00	7.0625	10.5625	7.0625	8.9375	7.0625	12.0625	7.0625	15.0625	7.0625	20.8125	7.0625	14.625
2018-03-15	17:00:00	8.875	15.5	8.875	7	8.875	17.0625	8.875	11.125	8.875	8.75	8.875	9.3125
2018-03-15	17:30:00	11.125	16.1875	11.125	21.0625	11.125	6.3125	11.125	10.375	11.125	6.625	11.125	19.1875
2018-03-15	18:00:00	10.5	9.8125	10.5	19	10.5	4.625	10.5	20.875	10.5	16.25	10.5	15.25
2018-03-15	18:30:00	13.3125	15.5625	13.3125	9.375	13.3125	6.4375	13.3125	16.875	13.3125	17.6875	13.3125	20.125
2018-03-15	19:00:00	15.0625	26.875	15.0625	9.9375	15.0625	6.75	15.0625	17.75	15.0625	13.4375	15.0625	22.5
2018-03-15	19:30:00	22.3125	15.6875	22.3125	24.875	22.3125	1.75	22.3125	19	22.3125	12.75	22.3125	16.75
2018-03-15	20:00:00	5	19.625	5	14.75	5	12.1875	5	28.75	5	17.1875	5	10.0625
2018-03-15	20:30:00	14.5	15.875	14.5	16.5	14.5	16.5625	14.5	12.6875	14.5	18.0625	14.5	18.5625
2018-03-15	21:00:00	13.6875	10.8125	13.6875	14.3125	13.6875	15.125	13.6875	19.6875	13.6875	19.375	13.6875	26
2018-03-15	21:30:00	14.25	14.9375	14.25	20.8125	14.25	11.1875	14.25	28.125	14.25	11.25	14.25	21.875
2018-03-15	22:00:00	9.125	16.1875	9.125	10.6875	9.125	13.6875	9.125	19.25	9.125	17.8125	9.125	16.25
2018-03-15	22:30:00	10.375	26	10.375	19.125	10.375	15.6875	10.375	13.3125	10.375	4.4375	10.375	23.25
2018-03-15	23:00:00	14.875	24.3125	14.875	26.25	14.875	19.6875	14.875	14.3125	14.875	11.75	14.875	22.875
2018-03-15	23:30:00	11.125	16.9375	11.125	19.8125	11.125	20.4375	11.125	17.75	11.125	23.0625	11.125	17.125

## Sheet: TD2 3
Graphs show behavior in DD
LD: 31-Mar-18 to 5-Apr-18
DD: 6-Apr-18 to 11-Apr-18
TD2/+
	Time	No Light Pulse	ZT13 Pulse	No Light Pulse	ZT15 Pulse	No Light Pulse	ZT17 Pulse	No Light Pulse	ZT19 Pulse	No Light Pulse	ZT21 Pulse	No Light Pulse	ZT23 Pulse
2018-03-31	00:00:00	67.9375	72.4375	67.9375	71.1875	67.9375	87.9375	67.9375	79.25	67.9375	95.25	67.9375	71.75
2018-03-31	00:30:00	65.8125	60.5625	65.8125	54.0625	65.8125	69.5625	65.8125	64.625	65.8125	79.75	65.8125	63.9375
2018-03-31	01:00:00	52.625	49.3125	52.625	44.5625	52.625	66.5	52.625	51.0625	52.625	72.0625	52.625	51.375
2018-03-31	01:30:00	42.5	45.75	42.5	33.4375	42.5	61.0625	42.5	45.875	42.5	68.5625	42.5	45.1875
2018-03-31	02:00:00	46.25	42.5	46.25	32.625	46.25	53.1875	46.25	35.125	46.25	56.5625	46.25	34.625
2018-03-31	02:30:00	33.75	34.0625	33.75	26.75	33.75	40.8125	33.75	35.25	33.75	46.3125	33.75	33.4375
2018-03-31	03:00:00	30.125	29.875	30.125	30.875	30.125	33.0625	30.125	29.625	30.125	44	30.125	42.8125
2018-03-31	03:30:00	25.375	34.8125	25.375	33.1875	25.375	52.125	25.375	33.1875	25.375	36.75	25.375	33.1875
2018-03-31	04:00:00	26.5625	20.3125	26.5625	35.75	26.5625	42.75	26.5625	34.9375	26.5625	40.75	26.5625	29.1875
2018-03-31	04:30:00	21.8125	25	21.8125	29.5625	21.8125	41	21.8125	30.8125	21.8125	37.3125	21.8125	26.75
2018-03-31	05:00:00	24.4375	26.9375	24.4375	37.3125	24.4375	47.3125	24.4375	41.625	24.4375	43.0625	24.4375	17.375
2018-03-31	05:30:00	22.8125	27.4375	22.8125	35.75	22.8125	40.5625	22.8125	32.875	22.8125	35.5	22.8125	22.9375
2018-03-31	06:00:00	15.625	29.0625	15.625	24.125	15.625	47.75	15.625	36.0625	15.625	34.3125	15.625	40.75
2018-03-31	06:30:00	31.375	26.5625	31.375	36.8125	31.375	56.375	31.375	23.5	31.375	40.0625	31.375	32.9375
2018-03-31	07:00:00	43.25	29.6875	43.25	29.5625	43.25	42.8125	43.25	24.375	43.25	35.4375	43.25	22
2018-03-31	07:30:00	26.0625	29.125	26.0625	33.4375	26.0625	33.5	26.0625	31.9375	26.0625	49.8125	26.0625	42.4375
2018-03-31	08:00:00	32.875	19.125	32.875	19.125	32.875	37.5625	32.875	32.3125	32.875	42.1875	32.875	35.5
2018-03-31	08:30:00	74.625	103.562	74.625	89	74.625	100.062	74.625	103.188	74.625	110.625	74.625	106.312
2018-03-31	09:00:00	39.5625	48.1875	39.5625	36.875	39.5625	46.4375	39.5625	53.3125	39.5625	54.3125	39.5625	56.875
2018-03-31	09:30:00	13.0625	24.5	13.0625	15.625	13.0625	26	13.0625	17.5625	13.0625	29.4375	13.0625	16.8125
2018-03-31	10:00:00	2.8125	2.1875	2.8125	6.5	2.8125	4.5625	2.8125	6.625	2.8125	17.4375	2.8125	1.3125
2018-03-31	10:30:00	0.1875	2.5	0.1875	7	0.1875	0	0.1875	10.0625	0.1875	15.6875	0.1875	1
2018-03-31	11:00:00	1.375	0.1875	1.375	10.5	1.375	1.875	1.375	6.5625	1.375	7.375	1.375	0.3125
2018-03-31	11:30:00	0.25	5.125	0.25	15.875	0.25	9.9375	0.25	6.5625	0.25	2.8125	0.25	13.0625
2018-03-31	12:00:00	16.4375	0.125	16.4375	14.1875	16.4375	12.3125	16.4375	14.3125	16.4375	12.1875	16.4375	13.125
2018-03-31	12:30:00	26.25	3	26.25	9.25	26.25	16.3125	26.25	10.5625	26.25	24.4375	26.25	26.3125
2018-03-31	13:00:00	21.375	14.9375	21.375	9.3125	21.375	20.5625	21.375	12.5	21.375	31.125	21.375	31
2018-03-31	13:30:00	17.9375	28.8125	17.9375	26.5	17.9375	42	17.9375	12.5625	17.9375	30.125	17.9375	31.6875
2018-03-31	14:00:00	29.875	41.125	29.875	27	29.875	23.9375	29.875	28.25	29.875	16.3125	29.875	21.1875
2018-03-31	14:30:00	28.6875	25.9375	28.6875	29.5	28.6875	22.625	28.6875	35.4375	28.6875	5.4375	28.6875	18.8125
2018-03-31	15:00:00	22.5	32	22.5	29.625	22.5	27.5625	22.5	39.9375	22.5	2.8125	22.5	28.375
2018-03-31	15:30:00	18.9375	31.75	18.9375	19.9375	18.9375	14.1875	18.9375	35.1875	18.9375	40.5625	18.9375	22.75
2018-03-31	16:00:00	36	18.6875	36	20.75	36	18.125	36	31.3125	36	61.9375	36	27.4375
2018-03-31	16:30:00	33.5625	20.875	33.5625	17.1875	33.5625	30.1875	33.5625	35.3125	33.5625	48.25	33.5625	35.3125
2018-03-31	17:00:00	23.875	32.625	23.875	33.375	23.875	36.0625	23.875	23.75	23.875	42.4375	23.875	24.8125
2018-03-31	17:30:00	8.9375	19.625	8.9375	22.625	8.9375	38.5	8.9375	22.6875	8.9375	24.6875	8.9375	9.125
2018-03-31	18:00:00	8.1875	22.4375	8.1875	42.0625	8.1875	30.25	8.1875	26.4375	8.1875	23.9375	8.1875	10.3125
2018-03-31	18:30:00	25.4375	22.6875	25.4375	26.75	25.4375	40	25.4375	27.25	25.4375	15.75	25.4375	27.3125
2018-03-31	19:00:00	32	40.9375	32	23.1875	32	51.75	32	29.3125	32	29.5	32	40.125
2018-03-31	19:30:00	53.1875	45.375	53.1875	45.5	53.1875	34.625	53.1875	50.8125	53.1875	40.6875	53.1875	71.25
2018-03-31	20:00:00	50.0625	55.1875	50.0625	48.375	50.0625	38.0625	50.0625	50.6875	50.0625	58.75	50.0625	54.875
2018-03-31	20:30:00	67.625	62.5625	67.625	65.875	67.625	89.9375	67.625	73.375	67.625	73.875	67.625	63.4375
2018-03-31	21:00:00	35.5625	37.4375	35.5625	43.6875	35.5625	59.375	35.5625	52.1875	35.5625	59.75	35.5625	43.5
2018-03-31	21:30:00	25.4375	42.625	25.4375	44.875	25.4375	51	25.4375	43.625	25.4375	42.0625	25.4375	40.125
2018-03-31	22:00:00	21.6875	30.8125	21.6875	34.625	21.6875	51.5	21.6875	37.4375	21.6875	41.875	21.6875	30.625
2018-03-31	22:30:00	20.875	20.25	20.875	24.75	20.875	35.4375	20.875	31	20.875	25.5	20.875	33.5
2018-03-31	23:00:00	27.25	19.5625	27.25	25.125	27.25	25.8125	27.25	24.875	27.25	23.4375	27.25	24.5
2018-03-31	23:30:00	12.25	20.875	12.25	19.625	12.25	28.375	12.25	21.625	12.25	18.0625	12.25	20.375
2018-04-01	00:00:00	9.25	17	9.25	17	9.25	13.3125	9.25	14.8125	9.25	10.5625	9.25	19.625
2018-04-01	00:30:00	15.6875	15.3125	15.6875	14.0625	15.6875	13.1875	15.6875	12.5625	15.6875	15.5625	15.6875	24.5
2018-04-01	01:00:00	14.6875	9.9375	14.6875	11.375	14.6875	18	14.6875	15.75	14.6875	16.8125	14.6875	23.9375
2018-04-01	01:30:00	12.8125	14	12.8125	9.9375	12.8125	13.6875	12.8125	13.125	12.8125	10	12.8125	8.875
2018-04-01	02:00:00	5.375	13.625	5.375	12.8125	5.375	13.5	5.375	13.75	5.375	12	5.375	10.875
2018-04-01	02:30:00	9.9375	14.0625	9.9375	4.6875	9.9375	15.75	9.9375	6.375	9.9375	11.1875	9.9375	6.625
2018-04-01	03:00:00	29.5	14.5625	29.5	5.375	29.5	10.0625	29.5	5.875	29.5	5.8125	29.5	10.875
2018-04-01	03:30:00	27.4375	15.75	27.4375	11.6875	27.4375	23.6875	27.4375	10	27.4375	27.5	27.4375	13.9375
2018-04-01	04:00:00	34.8125	19.125	34.8125	26.375	34.8125	33.25	34.8125	14.75	34.8125	24.6875	34.8125	33.6875
2018-04-01	04:30:00	32.8125	29.1875	32.8125	23.0625	32.8125	25.6875	32.8125	28.6875	32.8125	37.6875	32.8125	32.5625
2018-04-01	05:00:00	39.125	30.625	39.125	35.5	39.125	51.125	39.125	22	39.125	51.875	39.125	42.6875
2018-04-01	05:30:00	46.3125	43.5625	46.3125	37	46.3125	45	46.3125	34	46.3125	49.25	46.3125	53.25
2018-04-01	06:00:00	57	52.125	57	45.6875	57	68.3125	57	51.5	57	63.125	57	55.0625
2018-04-01	06:30:00	65.5	67.5625	65.5	51.75	65.5	73.1875	65.5	52.875	65.5	75.375	65.5	66.625
2018-04-01	07:00:00	65.875	76.5625	65.875	62.5625	65.875	82	65.875	61.25	65.875	88.0625	65.875	66.1875
2018-04-01	07:30:00	75.75	75.9375	75.75	68.75	75.75	86.25	75.75	73.75	75.75	90.8125	75.75	72.25
2018-04-01	08:00:00	76.9375	80.125	76.9375	75.5	76.9375	89.9375	76.9375	78.4375	76.9375	99.375	76.9375	77.125
2018-04-01	08:30:00	80.75	112.75	80.75	113.5	80.75	119	80.75	100.688	80.75	121.625	80.75	100.062
2018-04-01	09:00:00	34.0625	49.75	34.0625	40.875	34.0625	34.625	34.0625	32.9375	34.0625	62.625	34.0625	46.4375
2018-04-01	09:30:00	13.625	15.8125	13.625	8	13.625	16.375	13.625	19.8125	13.625	8.1875	13.625	13.4375
2018-04-01	10:30:00	6.25	5.0625	6.25	1.0625	6.25	14.5	6.25	3.6875	6.25	2.625	6.25	0.625
2018-04-01	11:00:00	5.3125	5.3125	5.3125	2.125	5.3125	1.1875	5.3125	2.4375	5.3125	5.4375	5.3125	3.1875
2018-04-01	11:30:00	8.9375	8.4375	8.9375	5.8125	8.9375	8.5625	8.9375	1.8125	8.9375	7.6875	8.9375	5.5
2018-04-01	12:00:00	7.8125	12.9375	7.8125	4.375	7.8125	11.8125	7.8125	1.625	7.8125	10.25	7.8125	9.8125
2018-04-01	12:30:00	19.4375	12.1875	19.4375	7.75	19.4375	25.1875	19.4375	7.5625	19.4375	1.6875	19.4375	15.5625
2018-04-01	13:00:00	14.1875	10.6875	14.1875	13.6875	14.1875	25.0625	14.1875	8.875	14.1875	0.6875	14.1875	9.5
2018-04-01	13:30:00	20.75	11.3125	20.75	11.8125	20.75	17.0625	20.75	7.9375	20.75	2.0625	20.75	10.9375
2018-04-01	14:00:00	16.1875	25.5625	16.1875	9.3125	16.1875	19.25	16.1875	18.4375	16.1875	4.9375	16.1875	17.8125
2018-04-01	14:30:00	8.5	18.0625	8.5	18.875	8.5	27.25	8.5	21.25	8.5	17.5625	8.5	21.8125
2018-04-01	15:00:00	4.875	12.3125	4.875	17.125	4.875	13.5625	4.875	14.5	4.875	31	4.875	19.0625
2018-04-01	15:30:00	11.875	13.125	11.875	34.1875	11.875	17.625	11.875	12.8125	11.875	26.3125	11.875	36
2018-04-01	16:00:00	32.375	11.125	32.375	46	32.375	15.9375	32.375	18.4375	32.375	17.625	32.375	23.125
2018-04-01	16:30:00	30.0625	21.0625	30.0625	21.75	30.0625	24.1875	30.0625	24.4375	30.0625	22.5	30.0625	32.875
2018-04-01	17:00:00	28.8125	15.25	28.8125	10.125	28.8125	26.3125	28.8125	24.8125	28.8125	14.375	28.8125	18.875
2018-04-01	17:30:00	25	25.875	25	24.1875	25	24.3125	25	22.5	25	24.4375	25	21.4375
2018-04-01	18:00:00	15.875	18.8125	15.875	14.6875	15.875	22.875	15.875	26.625	15.875	46.25	15.875	23.0625
2018-04-01	18:30:00	10	10.5	10	15.375	10	26.5625	10	19	10	42.25	10	15.625
2018-04-01	19:00:00	24.375	25.4375	24.375	28.4375	24.375	25.3125	24.375	27.0625	24.375	28.625	24.375	11.3125
2018-04-01	19:30:00	14.4375	36.3125	14.4375	37.5	14.4375	32.6875	14.4375	29.1875	14.4375	47.3125	14.4375	48.875
2018-04-01	20:00:00	37.125	42.5	37.125	51	37.125	58.9375	37.125	44.3125	37.125	54.25	37.125	54.875
2018-04-01	20:30:00	87.0625	85.375	87.0625	76.9375	87.0625	92.75	87.0625	74.1875	87.0625	92.9375	87.0625	81.5625
2018-04-01	21:00:00	45.1875	45.8125	45.1875	44.1875	45.1875	59.75	45.1875	44.9375	45.1875	71	45.1875	50.625
2018-04-01	21:30:00	22.5	38.6875	22.5	35.5625	22.5	39.625	22.5	39.1875	22.5	47	22.5	35.5625
2018-04-01	22:00:00	19.8125	27.9375	19.8125	24.9375	19.8125	27.8125	19.8125	30.5	19.8125	35.0625	19.8125	23.8125
2018-04-01	22:30:00	20.375	24.5625	20.375	17.4375	20.375	17.375	20.375	22.75	20.375	17.0625	20.375	16.5
2018-04-01	23:00:00	19.375	16.75	19.375	14.5625	19.375	17.4375	19.375	9.6875	19.375	14.25	19.375	14.375
2018-04-01	23:30:00	17.5625	9.125	17.5625	8.8125	17.5625	8.6875	17.5625	12.75	17.5625	3.75	17.5625	16.8125
2018-04-02	00:00:00	14.375	10.8125	14.375	10.3125	14.375	12.4375	14.375	17.9375	14.375	5.75	14.375	16.125
2018-04-02	00:30:00	17.0625	10.875	17.0625	15.875	17.0625	15.6875	17.0625	2.8125	17.0625	2.125	17.0625	16.625
2018-04-02	01:00:00	15.375	6.3125	15.375	7.125	15.375	9.125	15.375	7.5625	15.375	4.3125	15.375	13.125
2018-04-02	01:30:00	15.5625	7	15.5625	6.3125	15.5625	11.8125	15.5625	4.3125	15.5625	4.75	15.5625	6.75
2018-04-02	02:00:00	11.625	6.875	11.625	9.3125	11.625	13.25	11.625	2.8125	11.625	3.8125	11.625	16.1875
2018-04-02	02:30:00	17	2.25	17	6.5625	17	10	17	1.6875	17	4.4375	17	4
2018-04-02	03:00:00	23.8125	2.5	23.8125	7.375	23.8125	2.125	23.8125	5.3125	23.8125	1.5625	23.8125	6.375
2018-04-02	03:30:00	28.9375	4.5625	28.9375	6	28.9375	5.5	28.9375	4.375	28.9375	9.875	28.9375	4.8125
2018-04-02	04:00:00	23.75	8.75	23.75	6.3125	23.75	8.5625	23.75	7.125	23.75	15.625	23.75	13.25
2018-04-02	04:30:00	38.5625	16.875	38.5625	18.8125	38.5625	8.8125	38.5625	14.125	38.5625	26.9375	38.5625	25.5625
2018-04-02	05:00:00	47.375	16.3125	47.375	26.875	47.375	37.1875	47.375	19.5625	47.375	37.8125	47.375	26.75
2018-04-02	05:30:00	39.1875	33.1875	39.1875	40.4375	39.1875	39.8125	39.1875	23.3125	39.1875	46.625	39.1875	23.875
2018-04-02	06:00:00	57.8125	35.4375	57.8125	34.9375	57.8125	53.375	57.8125	43.4375	57.8125	60.4375	57.8125	52.0625
2018-04-02	06:30:00	56.375	44.5625	56.375	42.3125	56.375	61.25	56.375	46	56.375	63.625	56.375	55.0625
2018-04-02	07:00:00	53.1875	60.8125	53.1875	58.4375	53.1875	67.4375	53.1875	59.3125	53.1875	73	53.1875	72.1875
2018-04-02	07:30:00	63.5625	66.25	63.5625	69.9375	63.5625	82.3125	63.5625	67.9375	63.5625	83.5	63.5625	68.25
2018-04-02	08:00:00	63.875	79.8125	63.875	74.9375	63.875	79.125	63.875	70.125	63.875	103.625	63.875	74.625
2018-04-02	08:30:00	75.5	100.438	75.5	92.0625	75.5	100.688	75.5	84.25	75.5	113.312	75.5	99.625
2018-04-02	09:00:00	45.5625	61.625	45.5625	63.125	45.5625	58.125	45.5625	66.75	45.5625	64.5	45.5625	44.5625
2018-04-02	09:30:00	21.625	23.75	21.625	21.625	21.625	25.25	21.625	43.625	21.625	20.4375	21.625	35.125
2018-04-02	10:00:00	8.5	18.1875	8.5	6.9375	8.5	5.6875	8.5	21.625	8.5	11.125	8.5	12.375
2018-04-02	10:30:00	9.375	7.1875	9.375	6	9.375	8.1875	9.375	10.875	9.375	8.0625	9.375	15.8125
2018-04-02	11:00:00	10.375	7.0625	10.375	5.125	10.375	9.3125	10.375	6.9375	10.375	2.125	10.375	20
2018-04-02	11:30:00	0.875	9.125	0.875	3.0625	0.875	16.125	0.875	6.0625	0.875	6.375	0.875	19.3125
2018-04-02	12:00:00	7.75	21	7.75	7	7.75	17.9375	7.75	8.6875	7.75	13.0625	7.75	11.4375
2018-04-02	12:30:00	7.625	24.9375	7.625	17.875	7.625	24.5625	7.625	6.5	7.625	26.4375	7.625	16.6875
2018-04-02	13:00:00	20.8125	18.0625	20.8125	18.4375	20.8125	28.6875	20.8125	9.0625	20.8125	15.75	20.8125	12.8125
2018-04-02	13:30:00	15.4375	22.6875	15.4375	12.25	15.4375	20.3125	15.4375	13.9375	15.4375	11.1875	15.4375	4.125
2018-04-02	14:00:00	8	12.875	8	11.1875	8	20.0625	8	4.1875	8	6.3125	8	16.3125
2018-04-02	14:30:00	13.75	11.4375	13.75	15.1875	13.75	21.125	13.75	10.9375	13.75	9.9375	13.75	12.3125
2018-04-02	15:00:00	14.5	17.0625	14.5	20.0625	14.5	13.125	14.5	6.125	14.5	8.5	14.5	18.9375
2018-04-02	15:30:00	13.3125	13	13.3125	21.75	13.3125	8.625	13.3125	34.75	13.3125	9.75	13.3125	17.125
2018-04-02	16:00:00	20.8125	24.625	20.8125	21.125	20.8125	20.5625	20.8125	32.0625	20.8125	13.75	20.8125	25.5
2018-04-02	16:30:00	13.5	39.1875	13.5	12.9375	13.5	13.75	13.5	15.5625	13.5	27.5625	13.5	24.5
2018-04-02	17:00:00	18.875	33.625	18.875	25.375	18.875	16.375	18.875	20.125	18.875	23.25	18.875	15.8125
2018-04-02	17:30:00	6.6875	20.4375	6.6875	23.625	6.6875	19.5625	6.6875	10	6.6875	22.5	6.6875	18.875
2018-04-02	18:00:00	12.125	24.0625	12.125	12.125	12.125	30.1875	12.125	12.3125	12.125	26.625	12.125	18.25
2018-04-02	18:30:00	8.25	5.125	8.25	18.625	8.25	26.125	8.25	17.9375	8.25	17.1875	8.25	14.0625
2018-04-02	19:00:00	5.4375	17.9375	5.4375	24.3125	5.4375	28	5.4375	27.3125	5.4375	35.875	5.4375	16.625
2018-04-02	19:30:00	28.75	27.1875	28.75	17.875	28.75	27.0625	28.75	26.125	28.75	36.3125	28.75	27.75
2018-04-02	20:00:00	34.8125	38.75	34.8125	52.125	34.8125	37.0625	34.8125	42.4375	34.8125	44.3125	34.8125	43.125
2018-04-02	20:30:00	76.0625	79.75	76.0625	78.5	76.0625	101.875	76.0625	71.5	76.0625	93.5625	76.0625	84.6875
2018-04-02	21:00:00	17.0625	42.8125	17.0625	46.3125	17.0625	69.0625	17.0625	46.5625	17.0625	54.9375	17.0625	40.5
2018-04-02	21:30:00	10.375	33.6875	10.375	38.1875	10.375	46.0625	10.375	33	10.375	37	10.375	25.125
2018-04-02	22:00:00	5.375	19.8125	5.375	22.0625	5.375	25.5625	5.375	15.75	5.375	24.25	5.375	24.375
2018-04-02	22:30:00	6.9375	16.1875	6.9375	12.125	6.9375	21.5625	6.9375	18.625	6.9375	9.125	6.9375	20.375
2018-04-02	23:00:00	4	4.75	4	11.4375	4	9.25	4	11.8125	4	6.1875	4	19.5625
2018-04-02	23:30:00	6.875	9.1875	6.875	7.125	6.875	9.125	6.875	2.875	6.875	1.125	6.875	7.6875
2018-04-03	00:00:00	2.6875	5.6875	2.6875	7.4375	2.6875	7.0625	2.6875	10.0625	2.6875	2.3125	2.6875	14.125
2018-04-03	00:30:00	5.75	5	5.75	10.4375	5.75	7.625	5.75	3.875	5.75	2.625	5.75	7.5
2018-04-03	01:00:00	3.125	6	3.125	7.5625	3.125	12.6875	3.125	3	3.125	2.1875	3.125	10
2018-04-03	01:30:00	1.6875	5.75	1.6875	5.4375	1.6875	3.6875	1.6875	1.25	1.6875	4.625	1.6875	6.5625
2018-04-03	02:00:00	8.6875	3	8.6875	4.375	8.6875	6.5625	8.6875	2.375	8.6875	6.0625	8.6875	7.0625
2018-04-03	02:30:00	1.125	5.375	1.125	4.1875	1.125	3.5625	1.125	5.9375	1.125	1.1875	1.125	4.3125
2018-04-03	03:00:00	0.9375	8.1875	0.9375	2.375	0.9375	2.125	0.9375	0.125	0.9375	3.5625	0.9375	4.0625
2018-04-03	03:30:00	4.25	7.25	4.25	3.75	4.25	2.75	4.25	1.1875	4.25	0.375	4.25	8.0625
2018-04-03	04:00:00	18.125	5.4375	18.125	13	18.125	9.3125	18.125	10.125	18.125	10.1875	18.125	5.125
2018-04-03	04:30:00	21.6875	12	21.6875	11.125	21.6875	10.625	21.6875	6.625	21.6875	29.8125	21.6875	13.9375
2018-04-03	05:00:00	31.6875	22.875	31.6875	20.1875	31.6875	45.6875	31.6875	22.625	31.6875	43.5	31.6875	10.125
2018-04-03	05:30:00	50.1875	32.375	50.1875	37.6875	50.1875	51.9375	50.1875	18.375	50.1875	52.625	50.1875	37.875
2018-04-03	06:00:00	52.0625	36.125	52.0625	34.9375	52.0625	51.125	52.0625	31.4375	52.0625	56.9375	52.0625	44
2018-04-03	06:30:00	46.625	44	46.625	42.75	46.625	62.1875	46.625	46.4375	46.625	62.5	46.625	62.4375
2018-04-03	07:00:00	61.4375	59.5625	61.4375	57.75	61.4375	75.375	61.4375	54.0625	61.4375	79.4375	61.4375	63.1875
2018-04-03	07:30:00	63.8125	68.125	63.8125	67.6875	63.8125	79.9375	63.8125	60.3125	63.8125	85.6875	63.8125	68.375
2018-04-03	08:00:00	66.75	75.8125	66.75	75.625	66.75	82	66.75	63.6875	66.75	89.6875	66.75	77.4375
2018-04-03	08:30:00	66.75	99.4375	66.75	90.875	66.75	95.6875	66.75	79.375	66.75	100.812	66.75	90.6875
2018-04-03	09:00:00	36.8125	49.6875	36.8125	66.5	36.8125	62.0625	36.8125	51	36.8125	66.875	36.8125	57.875
2018-04-03	09:30:00	16.3125	21.3125	16.3125	24.625	16.3125	31.0625	16.3125	33.1875	16.3125	24.9375	16.3125	29.75
2018-04-03	10:00:00	8.25	7.9375	8.25	6.5625	8.25	14.125	8.25	11.9375	8.25	7.75	8.25	13
2018-04-03	10:30:00	4.1875	3.6875	4.1875	6.3125	4.1875	9.5	4.1875	7.375	4.1875	3.6875	4.1875	4.3125
2018-04-03	11:00:00	0.9375	6.5625	0.9375	6.375	0.9375	5.1875	0.9375	10.6875	0.9375	7.5	0.9375	12.25
2018-04-03	11:30:00	4.625	17.0625	4.625	6.625	4.625	16.6875	4.625	12.75	4.625	11.8125	4.625	12.75
2018-04-03	12:00:00	4.6875	4.625	4.6875	17.5	4.6875	26.5	4.6875	6.25	4.6875	16.6875	4.6875	8.5
2018-04-03	12:30:00	21.5625	6	21.5625	20.4375	21.5625	13.375	21.5625	14.6875	21.5625	11.6875	21.5625	15.875
2018-04-03	13:00:00	10	14.0625	10	6.125	10	23	10	19.625	10	18	10	17.3125
2018-04-03	13:30:00	0	11.4375	0	19.625	0	14.1875	0	10.0625	0	12	0	16.875
2018-04-03	14:00:00	10.25	12.875	10.25	31.875	10.25	19.625	10.25	18.1875	10.25	30.4375	10.25	15.5
2018-04-03	14:30:00	12.0625	19.0625	12.0625	23	12.0625	19.4375	12.0625	17.125	12.0625	30.125	12.0625	15.8125
2018-04-03	15:00:00	14.875	14.5	14.875	10.375	14.875	18.0625	14.875	8.5	14.875	28.9375	14.875	15.6875
2018-04-03	15:30:00	24.875	14.625	24.875	22.625	24.875	10.9375	24.875	13.3125	24.875	16.625	24.875	12.8125
2018-04-03	16:00:00	7.4375	19.375	7.4375	27.5	7.4375	12.5	7.4375	16.5625	7.4375	11.5	7.4375	11
2018-04-03	16:30:00	7.875	22.75	7.875	22.5625	7.875	19.4375	7.875	12.375	7.875	19.5625	7.875	13.125
2018-04-03	17:00:00	12.9375	28.125	12.9375	25.5	12.9375	36.9375	12.9375	19	12.9375	25	12.9375	18.4375
2018-04-03	17:30:00	22	18.9375	22	20.5	22	29.5	22	24.3125	22	25.0625	22	18.25
2018-04-03	18:00:00	22.9375	12.9375	22.9375	27.125	22.9375	19	22.9375	15.875	22.9375	42.4375	22.9375	23.125
2018-04-03	18:30:00	12.75	7.0625	12.75	16.6875	12.75	9.875	12.75	10	12.75	33.875	12.75	17.3125
2018-04-03	19:00:00	15.6875	18.5625	15.6875	18.8125	15.6875	17.625	15.6875	11.9375	15.6875	33.0625	15.6875	9.4375
2018-04-03	19:30:00	14.9375	35.75	14.9375	20.5625	14.9375	25.875	14.9375	30.5625	14.9375	45.875	14.9375	25.4375
2018-04-03	20:00:00	30.25	34.375	30.25	35.375	30.25	43.375	30.25	26.25	30.25	45.625	30.25	30.0625
2018-04-03	20:30:00	80.875	88.0625	80.875	76.875	80.875	106.562	80.875	62.875	80.875	94.8125	80.875	80.4375
2018-04-03	21:00:00	16.4375	43.6875	16.4375	41.6875	16.4375	61.5625	16.4375	43.0625	16.4375	48.4375	16.4375	40.375
2018-04-03	21:30:00	9.3125	34.875	9.3125	21.3125	9.3125	41.5	9.3125	26.0625	9.3125	28.5625	9.3125	30.8125
2018-04-03	22:00:00	2.375	24.1875	2.375	18.75	2.375	24.25	2.375	16.9375	2.375	20.4375	2.375	16
2018-04-03	22:30:00	4.3125	19.125	4.3125	7.875	4.3125	13.625	4.3125	10.3125	4.3125	12.5625	4.3125	11.8125
2018-04-03	23:00:00	1.4375	13.875	1.4375	9.5625	1.4375	16.1875	1.4375	6.25	1.4375	8.875	1.4375	14.3125
2018-04-03	23:30:00	0.8125	9.5	0.8125	5.9375	0.8125	7.5	0.8125	5.25	0.8125	5.9375	0.8125	5.375
2018-04-04	00:00:00	3.25	10.4375	3.25	7.0625	3.25	5.6875	3.25	6.4375	3.25	0.25	3.25	10.1875
2018-04-04	00:30:00	1.8125	4.8125	1.8125	5.875	1.8125	3.9375	1.8125	5.875	1.8125	0	1.8125	5.375
2018-04-04	01:00:00	0.25	5.6875	0.25	1.75	0.25	3.8125	0.25	1.1875	0.25	7.8125	0.25	16.3125
2018-04-04	01:30:00	7.125	0.5	7.125	4.25	7.125	6.9375	7.125	3.3125	7.125	0	7.125	7.875
2018-04-04	02:00:00	0.875	1.5	0.875	5.3125	0.875	1.1875	0.875	2.0625	0.875	0.3125	0.875	5.4375
2018-04-04	02:30:00	0	1.8125	0	0.75	0	0.8125	0	0.9375	0	0.75	0	1.5625
2018-04-04	03:00:00	0.8125	2.4375	0.8125	4.9375	0.8125	1.9375	0.8125	1.75	0.8125	2.1875	0.8125	2.375
2018-04-04	03:30:00	6.5	0.0625	6.5	3.75	6.5	4.375	6.5	0.8125	6.5	6.5625	6.5	1.8125
2018-04-04	04:00:00	12.4375	2.375	12.4375	5.4375	12.4375	4.3125	12.4375	2.625	12.4375	10.25	12.4375	6.9375
2018-04-04	04:30:00	29.8125	15.875	29.8125	14	29.8125	13.625	29.8125	7.4375	29.8125	14.5	29.8125	5.375
2018-04-04	05:00:00	26.4375	20	26.4375	21.25	26.4375	27.6875	26.4375	14.5625	26.4375	25.25	26.4375	14.1875
2018-04-04	05:30:00	41.1875	28.625	41.1875	32.125	41.1875	45.1875	41.1875	21.25	41.1875	43.125	41.1875	43.25
2018-04-04	06:00:00	46.25	40.6875	46.25	35.875	46.25	46.1875	46.25	32.9375	46.25	55.1875	46.25	43.9375
2018-04-04	06:30:00	47.375	59.4375	47.375	47.875	47.375	67.625	47.375	44.5	47.375	56.5	47.375	58.3125
2018-04-04	07:00:00	55.0625	67.5	55.0625	50.5	55.0625	82.625	55.0625	56.0625	55.0625	78.125	55.0625	57.8125
2018-04-04	07:30:00	55.875	71.75	55.875	63.4375	55.875	80.9375	55.875	58.1875	55.875	81.3125	55.875	68.4375
2018-04-04	08:00:00	65.5625	75.1875	65.5625	70.375	65.5625	86.125	65.5625	63.4375	65.5625	85.4375	65.5625	74.6875
2018-04-04	08:30:00	64.0625	89.125	64.0625	91.375	64.0625	87.875	64.0625	73.8125	64.0625	98.5	64.0625	99.75
2018-04-04	09:00:00	35.875	41.375	35.875	61.8125	35.875	44.0625	35.875	58.3125	35.875	49.3125	35.875	61.4375
2018-04-04	09:30:00	13.5625	19.0625	13.5625	19.9375	13.5625	15	13.5625	38.6875	13.5625	23.4375	13.5625	31.6875
2018-04-04	10:00:00	6.5	9.75	6.5	2.125	6.5	3.8125	6.5	10.25	6.5	4.0625	6.5	8.1875
2018-04-04	10:30:00	1.3125	1.4375	1.3125	1.5625	1.3125	4.5625	1.3125	7.6875	1.3125	7	1.3125	6.875
2018-04-04	11:00:00	8.5625	3.4375	8.5625	3.6875	8.5625	16.375	8.5625	3.9375	8.5625	0.625	8.5625	5.625
2018-04-04	11:30:00	16.875	12.8125	16.875	16.375	16.875	12.3125	16.875	11.8125	16.875	5.5	16.875	10.125
2018-04-04	12:00:00	5.4375	15.3125	5.4375	7.875	5.4375	6.5	5.4375	3.8125	5.4375	3.8125	5.4375	12.8125
2018-04-04	12:30:00	5.4375	11.8125	5.4375	6.4375	5.4375	7.875	5.4375	10.75	5.4375	5.5625	5.4375	16.5
2018-04-04	13:00:00	8.6875	16.5	8.6875	4.625	8.6875	18.1875	8.6875	6.3125	8.6875	13.3125	8.6875	11.1875
2018-04-04	13:30:00	2.4375	14.5	2.4375	18.125	2.4375	23.5	2.4375	16.25	2.4375	21.8125	2.4375	7
2018-04-04	14:00:00	11.4375	12.0625	11.4375	30.4375	11.4375	19.375	11.4375	8.9375	11.4375	23.125	11.4375	14.4375
2018-04-04	14:30:00	12.0625	14.6875	12.0625	22.4375	12.0625	18.75	12.0625	10.1875	12.0625	28.0625	12.0625	21.5625
2018-04-04	15:00:00	11.75	21.25	11.75	13.8125	11.75	12.3125	11.75	8.0625	11.75	18.5	11.75	16.625
2018-04-04	15:30:00	19.6875	17.5	19.6875	15.4375	19.6875	11.875	19.6875	13.875	19.6875	16.6875	19.6875	20.6875
2018-04-04	16:00:00	9.25	9.8125	9.25	20.9375	9.25	18.4375	9.25	12.5	9.25	28.8125	9.25	25.9375
2018-04-04	16:30:00	9.75	9.875	9.75	16.0625	9.75	19.25	9.75	14.75	9.75	6.8125	9.75	20.75
2018-04-04	17:00:00	5.125	14.3125	5.125	13.3125	5.125	23.875	5.125	11.25	5.125	12.75	5.125	22.3125
2018-04-04	17:30:00	12.4375	18.6875	12.4375	8.75	12.4375	24.75	12.4375	18.125	12.4375	18.6875	12.4375	17.5625
2018-04-04	18:00:00	6.75	24.125	6.75	27.125	6.75	11.25	6.75	19.75	6.75	15.875	6.75	24.0625
2018-04-04	18:30:00	5.375	26.5	5.375	21.0625	5.375	21.5625	5.375	11.6875	5.375	16.6875	5.375	24.4375
2018-04-04	19:00:00	8.625	16.8125	8.625	3.625	8.625	13.25	8.625	21.5	8.625	14.5	8.625	11.875
2018-04-04	19:30:00	29.125	8.75	29.125	18.9375	29.125	21.125	29.125	20.3125	29.125	24.875	29.125	18.1875
2018-04-04	20:00:00	32.75	33.4375	32.75	38	32.75	39.5	32.75	17.875	32.75	34.9375	32.75	38.25
2018-04-04	20:30:00	72.125	82.5	72.125	78.0625	72.125	109.25	72.125	66.4375	72.125	92	72.125	79.9375
2018-04-04	21:00:00	16.625	35.375	16.625	33.75	16.625	52.125	16.625	33	16.625	39.5625	16.625	33.5625
2018-04-04	21:30:00	9.375	20.125	9.375	21.0625	9.375	39.375	9.375	17.875	9.375	23.5625	9.375	24.9375
2018-04-04	22:00:00	2.5625	17.625	2.5625	11.375	2.5625	16.8125	2.5625	12.6875	2.5625	11.5625	2.5625	14.6875
2018-04-04	22:30:00	4.5625	12.4375	4.5625	15.625	4.5625	13.5625	4.5625	7	4.5625	9.875	4.5625	19.625
2018-04-04	23:00:00	4.625	12.125	4.625	6.3125	4.625	8.125	4.625	4.0625	4.625	9.1875	4.625	7.6875
2018-04-04	23:30:00	2.375	4.25	2.375	7.25	2.375	7.9375	2.375	8.3125	2.375	3.75	2.375	15.4375
2018-04-05	00:00:00	5	4.9375	5	9.8125	5	12.0625	5	5.3125	5	0.6875	5	14.8125
2018-04-05	00:30:00	1.5625	4.9375	1.5625	5	1.5625	6.875	1.5625	1.1875	1.5625	1.8125	1.5625	12.25
2018-04-05	01:00:00	0.3125	3.125	0.3125	3.3125	0.3125	8.8125	0.3125	4.375	0.3125	0.0625	0.3125	9.3125
2018-04-05	01:30:00	1.6875	2.4375	1.6875	1.1875	1.6875	4.6875	1.6875	7.9375	1.6875	0	1.6875	7.5
2018-04-05	02:00:00	0.25	0.4375	0.25	3.0625	0.25	5.125	0.25	1.125	0.25	0.875	0.25	7.375
2018-04-05	02:30:00	1.9375	0	1.9375	3.3125	1.9375	4.0625	1.9375	0.375	1.9375	0	1.9375	5.25
2018-04-05	03:00:00	4.625	0	4.625	1.375	4.625	5.375	4.625	1.0625	4.625	0.75	4.625	3.9375
2018-04-05	03:30:00	4.625	0.125	4.625	1.25	4.625	6.4375	4.625	0.9375	4.625	0	4.625	0.9375
2018-04-05	04:00:00	5.4375	6.5625	5.4375	6.625	5.4375	7.875	5.4375	1.0625	5.4375	4.6875	5.4375	0.8125
2018-04-05	04:30:00	12	7.4375	12	9.625	12	22.9375	12	3.0625	12	14.875	12	6.9375
2018-04-05	05:00:00	24.125	7.625	24.125	14.375	24.125	42.375	24.125	15.3125	24.125	34.0625	24.125	16.375
2018-04-05	05:30:00	38.3125	24.375	38.3125	29.75	38.3125	62.5625	38.3125	28.75	38.3125	49.8125	38.3125	22.125
2018-04-05	06:00:00	37.625	33.375	37.625	33.0625	37.625	61.375	37.625	30.125	37.625	63	37.625	42.6875
2018-04-05	06:30:00	46.875	54.6875	46.875	47.25	46.875	71.25	46.875	43.375	46.875	63.0625	46.875	58.8125
2018-04-05	07:00:00	49.0625	62.0625	49.0625	51.625	49.0625	77.5625	49.0625	51.25	49.0625	72.5625	49.0625	55.6875
2018-04-05	07:30:00	56.4375	67.9375	56.4375	59.0625	56.4375	86	56.4375	53.125	56.4375	81.1875	56.4375	63.5
2018-04-05	08:00:00	61.8125	72.125	61.8125	67.25	61.8125	90.125	61.8125	66.0625	61.8125	85.625	61.8125	63.3125
2018-04-05	08:30:00	56.25	84.375	56.25	81.4375	56.25	80.25	56.25	79.5	56.25	98.5625	56.25	77.75
2018-04-05	09:00:00	30	46.25	30	47.125	30	50.875	30	50.9375	30	61.25	30	40.875
2018-04-05	09:30:00	15.0625	0	15.0625	34.875	15.0625	36.75	15.0625	36.5625	15.0625	26	15.0625	34.8125
2018-04-05	10:00:00	11.9375	42.5	11.9375	7.5625	11.9375	4.5625	11.9375	11.25	11.9375	10.5625	11.9375	14.8125
2018-04-05	10:30:00	2.4375	12.8125	2.4375	1.0625	2.4375	4.625	2.4375	6	2.4375	5.8125	2.4375	1.875
2018-04-05	11:00:00	8.875	2	8.875	0	8.875	6.875	8.875	3.3125	8.875	0.9375	8.875	4.8125
2018-04-05	11:30:00	4.9375	2.5625	4.9375	0	4.9375	16.625	4.9375	1.9375	4.9375	0.5625	4.9375	4.0625
2018-04-05	12:00:00	3.8125	5.5625	3.8125	11.625	3.8125	14.6875	3.8125	8.875	3.8125	11.6875	3.8125	2.5
2018-04-05	12:30:00	0.75	6.0625	0.75	5.3125	0.75	16.5	0.75	4.5625	0.75	7.5	0.75	7.8125
2018-04-05	13:00:00	3.8125	11.6875	3.8125	1.75	3.8125	0	3.8125	4.375	3.8125	12.875	3.8125	2.3125
2018-04-05	13:30:00	10.8125	5.4375	10.8125	1.125	10.8125	0	10.8125	9	10.8125	11.375	10.8125	2.6875
2018-04-05	14:00:00	14.1875	4.6875	14.1875	5.5625	14.1875	26	14.1875	16.3125	14.1875	5	14.1875	20.375
2018-04-05	14:30:00	20.375	11.25	20.375	15.3125	20.375	8.8125	20.375	13.4375	20.375	8.9375	20.375	21.75
2018-04-05	15:00:00	8.4375	15.3125	8.4375	4	8.4375	10.3125	8.4375	18.6875	8.4375	20.6875	8.4375	10.8125
2018-04-05	15:30:00	3.3125	15.3125	3.3125	14.5	3.3125	25.6875	3.3125	0	3.3125	16.1875	3.3125	9.4375
2018-04-05	16:00:00	9.75	17.875	9.75	9.625	9.75	4.5625	9.75	15.5	9.75	16.5625	9.75	8.5
2018-04-05	16:30:00	8.0625	11.9375	8.0625	24.75	8.0625	6.3125	8.0625	2.125	8.0625	10.25	8.0625	13.1875
2018-04-05	17:00:00	6.6875	11.5625	6.6875	23.375	6.6875	10.75	6.6875	16	6.6875	0	6.6875	13.125
2018-04-05	17:30:00	22	18.875	22	12.625	22	2.25	22	8.75	22	0	22	13.625
2018-04-05	18:00:00	13.125	16.375	13.125	17.8125	13.125	8.875	13.125	14.5625	13.125	26.75	13.125	10
2018-04-05	18:30:00	10.375	14.75	10.375	7.6875	10.375	19.5	10.375	24.4375	10.375	26.3125	10.375	9.6875
2018-04-05	19:00:00	8.375	17.8125	8.375	15.75	8.375	16.375	8.375	22	8.375	25.9375	8.375	0
2018-04-05	19:30:00	11.6875	15.5	11.6875	17.9375	11.6875	23.6875	11.6875	32.875	11.6875	22.3125	11.6875	47.8125
2018-04-05	20:00:00	19.125	16.75	19.125	20.4375	19.125	15.9375	19.125	19.625	19.125	37.9375	19.125	16.0625
2018-04-05	20:30:00	36.75	25.3125	36.75	12.8125	36.75	17.1875	36.75	20.5625	36.75	32.1875	36.75	30.6875
2018-04-05	21:00:00	21.125	31.625	21.125	4.875	21.125	31.1875	21.125	23.625	21.125	31.25	21.125	21.5625
2018-04-05	21:30:00	18	18.5625	18	20.4375	18	15.4375	18	19.6875	18	22.5625	18	17.3125
2018-04-05	22:00:00	15	36.0625	15	28.1875	15	24.8125	15	15.25	15	22.75	15	23.875
2018-04-05	22:30:00	18.9375	24.125	18.9375	36.75	18.9375	34.75	18.9375	22.5	18.9375	30.625	18.9375	24.875
2018-04-05	23:00:00	15.4375	33.0625	15.4375	27.9375	15.4375	30.5	15.4375	19.625	15.4375	27.8125	15.4375	18.25
2018-04-05	23:30:00	18.6875	23.1875	18.6875	26.875	18.6875	24.625	18.6875	22.1875	18.6875	28.1875	18.6875	21.125
2018-04-06	00:00:00	16.6875	21.4375	16.6875	15	16.6875	18.5	16.6875	21	16.6875	21.5625	16.6875	28.4375
2018-04-06	00:30:00	14	29.75	14	21	14	24.625	14	17.8125	14	30.125	14	11.625
2018-04-06	01:00:00	16.9375	16.875	16.9375	18.4375	16.9375	22.625	16.9375	35.875	16.9375	32.625	16.9375	12.375
2018-04-06	01:30:00	16.9375	12.75	16.9375	20.75	16.9375	25.375	16.9375	31.875	16.9375	40.625	16.9375	20.8125
2018-04-06	02:00:00	23.25	23.75	23.25	18.8125	23.25	25.875	23.25	35.125	23.25	45.0625	23.25	29.0625
2018-04-06	02:30:00	19.6875	26.75	19.6875	23.875	19.6875	29.9375	19.6875	42	19.6875	45.875	19.6875	40
2018-04-06	03:00:00	29.6875	25.6875	29.6875	24.0625	29.6875	25.375	29.6875	40.625	29.6875	53.375	29.6875	43.0625
2018-04-06	03:30:00	29.8125	30.25	29.8125	18.375	29.8125	32.625	29.8125	39.1875	29.8125	51.25	29.8125	37.5
2018-04-06	04:00:00	39.0625	38.5	39.0625	26.9375	39.0625	22.25	39.0625	46.8125	39.0625	51.75	39.0625	45.25
2018-04-06	04:30:00	36	40.5625	36	22.125	36	28.5	36	43.625	36	54.3125	36	39.9375
2018-04-06	05:00:00	26.875	45.8125	26.875	16.3125	26.875	30.6875	26.875	46.4375	26.875	50.8125	26.875	45.875
2018-04-06	05:30:00	37.75	42.375	37.75	30.0625	37.75	29	37.75	46.25	37.75	56.1875	37.75	40.6875
2018-04-06	06:00:00	42.5	48.4375	42.5	39.125	42.5	33.5625	42.5	49.8125	42.5	51.1875	42.5	48.375
2018-04-06	06:30:00	33.875	52.4375	33.875	45.75	33.875	40.625	33.875	49.625	33.875	46.75	33.875	48.75
2018-04-06	07:00:00	37.625	43.25	37.625	46.5	37.625	41.125	37.625	53.375	37.625	54.625	37.625	46.9375
2018-04-06	07:30:00	38.5	48.6875	38.5	42.125	38.5	48.125	38.5	54.6875	38.5	52.0625	38.5	51.5
2018-04-06	08:00:00	37.9375	50.75	37.9375	50.4375	37.9375	55.1875	37.9375	56	37.9375	47.0625	37.9375	56.25
2018-04-06	08:30:00	41.0625	49.625	41.0625	48.75	41.0625	51.3125	41.0625	56.625	41.0625	30.6875	41.0625	43
2018-04-06	09:00:00	45.375	56.5625	45.375	50.25	45.375	54.6875	45.375	48.125	45.375	19.5	45.375	28.3125
2018-04-06	09:30:00	40.5625	53.8125	40.5625	44.3125	40.5625	56.8125	40.5625	53.1875	40.5625	18.6875	40.5625	16.125
2018-04-06	10:00:00	24.1875	55.375	24.1875	56.5625	24.1875	54.6875	24.1875	44.5625	24.1875	17.4375	24.1875	9.875
2018-04-06	10:30:00	25	60.25	25	59.5	25	54	25	41.5	25	16.8125	25	3.625
2018-04-06	11:00:00	9.8125	48.75	9.8125	50.375	9.8125	52.8125	9.8125	37.1875	9.8125	11.25	9.8125	8.9375
2018-04-06	11:30:00	4.9375	33.125	4.9375	54.5625	4.9375	59.5	4.9375	23.0625	4.9375	6.6875	4.9375	5.25
2018-04-06	12:00:00	2.4375	19.8125	2.4375	59.75	2.4375	61.5	2.4375	13.0625	2.4375	3.6875	2.4375	4.25
2018-04-06	12:30:00	0.125	9.75	0.125	50.1875	0.125	60.8125	0.125	16.0625	0.125	12	0.125	7.6875
2018-04-06	13:00:00	3.125	7.0625	3.125	49.5625	3.125	58.6875	3.125	6.0625	3.125	20.5625	3.125	3.25
2018-04-06	13:30:00	2.375	5.8125	2.375	20.0625	2.375	54.625	2.375	16.25	2.375	5.125	2.375	7.4375
2018-04-06	14:00:00	7.8125	10.875	7.8125	8.9375	7.8125	26.25	7.8125	3	7.8125	24.75	7.8125	0.75
2018-04-06	14:30:00	9.1875	10.625	9.1875	11.625	9.1875	10.6875	9.1875	8.8125	9.1875	17.5625	9.1875	6.6875
2018-04-06	15:00:00	2.8125	7.5625	2.8125	10.5	2.8125	8.0625	2.8125	3.375	2.8125	8.5625	2.8125	11
2018-04-06	15:30:00	11.3125	3.9375	11.3125	2.5625	11.3125	7.625	11.3125	12.75	11.3125	10	11.3125	8.8125
2018-04-06	16:00:00	15.75	8.375	15.75	5.5	15.75	2.8125	15.75	8.6875	15.75	15.25	15.75	18.875
2018-04-06	16:30:00	3.6875	5.1875	3.6875	10.625	3.6875	0.125	3.6875	5.6875	3.6875	33.6875	3.6875	11.375
2018-04-06	17:00:00	0.625	6.375	0.625	11.1875	0.625	6.625	0.625	13.6875	0.625	27.0625	0.625	6.6875
2018-04-06	17:30:00	1.875	8	1.875	4.0625	1.875	12.875	1.875	12.5	1.875	8.3125	1.875	3.125
2018-04-06	18:00:00	15.3125	9.4375	15.3125	7.625	15.3125	11.0625	15.3125	12.5625	15.3125	23.4375	15.3125	14.875
2018-04-06	18:30:00	7.3125	4.5625	7.3125	5.375	7.3125	17.625	7.3125	19	7.3125	34.1875	7.3125	18.1875
2018-04-06	19:00:00	8	5.8125	8	20.9375	8	10.125	8	16.5	8	29.9375	8	27.8125
2018-04-06	19:30:00	4.6875	16.25	4.6875	7.625	4.6875	9.4375	4.6875	14.0625	4.6875	23.625	4.6875	23.6875
2018-04-06	20:00:00	14.625	10.875	14.625	7.5625	14.625	10	14.625	23.1875	14.625	22.9375	14.625	20.4375
2018-04-06	20:30:00	19	18.25	19	12.4375	19	17.125	19	17.375	19	24.8125	19	20.4375
2018-04-06	21:00:00	15.9375	13.875	15.9375	12.9375	15.9375	22	15.9375	17.0625	15.9375	18.8125	15.9375	13.9375
2018-04-06	21:30:00	14.9375	18.8125	14.9375	15.3125	14.9375	18.875	14.9375	18.375	14.9375	18.25	14.9375	20.375
2018-04-06	22:00:00	16.3125	13.0625	16.3125	18.875	16.3125	16.625	16.3125	17.6875	16.3125	23.3125	16.3125	19.4375
2018-04-06	22:30:00	16.3125	18.75	16.3125	12.375	16.3125	22.125	16.3125	9.3125	16.3125	17.5625	16.3125	11
2018-04-06	23:00:00	9.125	18.5	9.125	31	9.125	14.4375	9.125	14.4375	9.125	24.6875	9.125	22.3125
2018-04-06	23:30:00	12.3125	34.5625	12.3125	19.6875	12.3125	9.5	12.3125	9.9375	12.3125	17.875	12.3125	21.625
2018-04-07	00:00:00	20.125	14.875	20.125	26.3125	20.125	23.4375	20.125	11.9375	20.125	23.4375	20.125	11.25
2018-04-07	00:30:00	20.6875	19.6875	20.6875	18.5625	20.6875	32.1875	20.6875	11.6875	20.6875	25.6875	20.6875	17.1875
2018-04-07	01:00:00	7	19.5	7	20	7	29.3125	7	11.4375	7	32.9375	7	22.875
2018-04-07	01:30:00	14.0625	17.25	14.0625	17.5	14.0625	14	14.0625	21.125	14.0625	28.75	14.0625	25.6875
2018-04-07	02:00:00	18.25	28.0625	18.25	12.875	18.25	20.9375	18.25	20.875	18.25	29.1875	18.25	27
2018-04-07	02:30:00	27.4375	21	27.4375	21.9375	27.4375	19.3125	27.4375	14.6875	27.4375	36.4375	27.4375	30.4375
2018-04-07	03:00:00	20.8125	16.4375	20.8125	24.5	20.8125	10.1875	20.8125	32.25	20.8125	49.375	20.8125	37.125
2018-04-07	03:30:00	31.6875	11.875	31.6875	13.0625	31.6875	16.125	31.6875	34.3125	31.6875	40.125	31.6875	50.75
2018-04-07	04:00:00	31.375	25.875	31.375	19.4375	31.375	18.25	31.375	35.375	31.375	46.125	31.375	29.875
2018-04-07	04:30:00	26.375	40.6875	26.375	7.125	26.375	20.25	26.375	27.9375	26.375	49	26.375	41.625
2018-04-07	05:00:00	39.0625	30.25	39.0625	25.4375	39.0625	21.125	39.0625	34.9375	39.0625	49.5	39.0625	45.125
2018-04-07	05:30:00	42.5	43.875	42.5	25.25	42.5	30.875	42.5	41.0625	42.5	43.375	42.5	42.4375
2018-04-07	06:00:00	40.625	45.375	40.625	30.875	40.625	39	40.625	35.9375	40.625	47.9375	40.625	38.3125
2018-04-07	06:30:00	29	40.875	29	30.25	29	39.9375	29	40.375	29	43.8125	29	46.875
2018-04-07	07:00:00	37.1875	44.75	37.1875	34.4375	37.1875	39.25	37.1875	42.1875	37.1875	49.0625	37.1875	44
2018-04-07	07:30:00	30.9375	46.3125	30.9375	39	30.9375	39.5	30.9375	40.5	30.9375	47.1875	30.9375	47.1875
2018-04-07	08:00:00	42.4375	50.3125	42.4375	41.5625	42.4375	36.875	42.4375	46.75	42.4375	43.5	42.4375	46
2018-04-07	08:30:00	39.8125	49.0625	39.8125	48.875	39.8125	38.5	39.8125	43.1875	39.8125	39.8125	39.8125	41.3125
2018-04-07	09:00:00	39.5	44.125	39.5	48.5625	39.5	45.8125	39.5	45.4375	39.5	34.9375	39.5	43.125
2018-04-07	09:30:00	38.0625	44.375	38.0625	42.5	38.0625	44.75	38.0625	49.875	38.0625	19.375	38.0625	38.875
2018-04-07	10:00:00	33.4375	53.0625	33.4375	41.125	33.4375	51	33.4375	47.75	33.4375	10.25	33.4375	26.8125
2018-04-07	10:30:00	27.6875	52.9375	27.6875	45.0625	27.6875	48.75	27.6875	42.3125	27.6875	22.1875	27.6875	16.5
2018-04-07	11:00:00	18.125	52.0625	18.125	44.5	18.125	53.0625	18.125	37.25	18.125	7.875	18.125	19.875
2018-04-07	11:30:00	23	46	23	52.9375	23	52.4375	23	26.0625	23	2.3125	23	12.125
2018-04-07	12:00:00	16.0625	22.125	16.0625	55.0625	16.0625	56.75	16.0625	20.1875	16.0625	0.625	16.0625	16
2018-04-07	12:30:00	5.125	22.1875	5.125	50.3125	5.125	58.5	5.125	17.875	5.125	10.8125	5.125	12.0625
2018-04-07	13:00:00	3.75	15.75	3.75	52.9375	3.75	61.875	3.75	9.875	3.75	9.8125	3.75	13.1875
2018-04-07	13:30:00	3.5	15.1875	3.5	45.125	3.5	53.25	3.5	3.8125	3.5	8.75	3.5	11.375
2018-04-07	14:00:00	7.125	10.25	7.125	31.6875	7.125	48.1875	7.125	8.8125	7.125	5.8125	7.125	2.4375
2018-04-07	14:30:00	1.625	1.9375	1.625	16.75	1.625	32.375	1.625	11.125	1.625	12.9375	1.625	4.875
2018-04-07	15:00:00	8.625	2.0625	8.625	6.8125	8.625	28.625	8.625	6.625	8.625	9.125	8.625	15.0625
2018-04-07	15:30:00	4	5.6875	4	6.8125	4	10.0625	4	9.3125	4	13.375	4	7.8125
2018-04-07	16:00:00	5.6875	5.625	5.6875	7.75	5.6875	11.0625	5.6875	1.5	5.6875	24.4375	5.6875	14.3125
2018-04-07	16:30:00	6.3125	10.1875	6.3125	6.1875	6.3125	9.0625	6.3125	7.875	6.3125	18.125	6.3125	4.6875
2018-04-07	17:00:00	4	7.75	4	5.9375	4	9	4	8.3125	4	20.4375	4	13.5
2018-04-07	17:30:00	4.125	4.8125	4.125	4.8125	4.125	5.75	4.125	15.0625	4.125	19.625	4.125	9.3125
2018-04-07	18:00:00	7.3125	7.875	7.3125	11.5	7.3125	10.5	7.3125	10.125	7.3125	21.125	7.3125	10.3125
2018-04-07	18:30:00	9	8.4375	9	10.5	9	16.625	9	14.1875	9	27.6875	9	6.6875
2018-04-07	19:00:00	7.4375	3.375	7.4375	13.5	7.4375	8.375	7.4375	8.9375	7.4375	22.5	7.4375	11.9375
2018-04-07	19:30:00	8.75	6.0625	8.75	6.375	8.75	7.6875	8.75	9.6875	8.75	22.75	8.75	15.625
2018-04-07	20:00:00	5.125	15.125	5.125	9.3125	5.125	9.1875	5.125	21.125	5.125	20.375	5.125	19.5625
2018-04-07	20:30:00	13.75	12.5625	13.75	12.5625	13.75	8.5625	13.75	15.75	13.75	31.0625	13.75	14.875
2018-04-07	21:00:00	17.5	7	17.5	7.5625	17.5	7.875	17.5	10.0625	17.5	15.125	17.5	20.875
2018-04-07	21:30:00	14.4375	11.4375	14.4375	13.3125	14.4375	18.8125	14.4375	20.625	14.4375	17.125	14.4375	16.4375
2018-04-07	22:00:00	8.4375	18.125	8.4375	12.5	8.4375	14.1875	8.4375	15.0625	8.4375	18.6875	8.4375	15.6875
2018-04-07	22:30:00	15.4375	17.9375	15.4375	12.1875	15.4375	13	15.4375	20.6875	15.4375	27.5	15.4375	16.0625
2018-04-07	23:00:00	12.8125	27.4375	12.8125	16.625	12.8125	26.625	12.8125	11	12.8125	19.25	12.8125	18.6875
2018-04-07	23:30:00	7	11.375	7	19.3125	7	20.1875	7	18.125	7	24.9375	7	11.5625
2018-04-08	00:00:00	13.25	20.9375	13.25	17.375	13.25	19.125	13.25	7.875	13.25	20.5	13.25	9.0625
2018-04-08	00:30:00	11.625	16.0625	11.625	27.125	11.625	17.6875	11.625	11.9375	11.625	13	11.625	10.375
2018-04-08	01:00:00	24.6875	20.5625	24.6875	16.625	24.6875	26	24.6875	10	24.6875	19.9375	24.6875	19.5
2018-04-08	01:30:00	20.3125	11.125	20.3125	13.5	20.3125	31.625	20.3125	16	20.3125	35.5625	20.3125	31.5625
2018-04-08	02:00:00	15.25	23.5625	15.25	17	15.25	18.4375	15.25	21.1875	15.25	33.375	15.25	26.6875
2018-04-08	02:30:00	17.375	18	17.375	14.4375	17.375	21.5	17.375	20.5	17.375	39.75	17.375	30.625
2018-04-08	03:00:00	19.9375	23.375	19.9375	14.3125	19.9375	14.6875	19.9375	25.25	19.9375	41.5625	19.9375	31.1875
2018-04-08	03:30:00	26.8125	7.1875	26.8125	13.625	26.8125	22.125	26.8125	20	26.8125	33.125	26.8125	27.375
2018-04-08	04:00:00	33.875	10.4375	33.875	13.3125	33.875	16.875	33.875	26.9375	33.875	38.0625	33.875	34.125
2018-04-08	04:30:00	36.4375	31.3125	36.4375	15	36.4375	21.1875	36.4375	28.625	36.4375	39.5	36.4375	37.75
2018-04-08	05:00:00	31.5	25	31.5	11.5	31.5	35.8125	31.5	30.625	31.5	38.375	31.5	32
2018-04-08	05:30:00	31.6875	35.375	31.6875	25.875	31.6875	26.1875	31.6875	34.875	31.6875	44	31.6875	38.8125
2018-04-08	06:00:00	27.1875	41.125	27.1875	30.875	27.1875	24.9375	27.1875	34.8125	27.1875	39.25	27.1875	30.5625
2018-04-08	06:30:00	39.125	43.875	39.125	27.0625	39.125	26	39.125	36.5625	39.125	43.1875	39.125	38.6875
2018-04-08	07:00:00	36.125	39.6875	36.125	38.4375	36.125	27.875	36.125	35.4375	36.125	46.5	36.125	42.0625
2018-04-08	07:30:00	41.4375	33.625	41.4375	39.375	41.4375	27.5	41.4375	36.4375	41.4375	44	41.4375	45.0625
2018-04-08	08:00:00	39.6875	36.6875	39.6875	39	39.6875	45.6875	39.6875	38.0625	39.6875	46.4375	39.6875	44.125
2018-04-08	08:30:00	47.9375	40.8125	47.9375	28.75	47.9375	39.5	47.9375	41.0625	47.9375	36.875	47.9375	43
2018-04-08	09:00:00	38.8125	41.9375	38.8125	37.5	38.8125	46.375	38.8125	39.1875	38.8125	32.1875	38.8125	41.4375
2018-04-08	09:30:00	41.75	39.3125	41.75	36.8125	41.75	45.3125	41.75	41.875	41.75	23.375	41.75	36.25
2018-04-08	10:00:00	38.5	44	38.5	38.4375	38.5	39.8125	38.5	40.6875	38.5	22.125	38.5	27.0625
2018-04-08	10:30:00	31.875	43.0625	31.875	44.375	31.875	39	31.875	37.25	31.875	16.6875	31.875	23.375
2018-04-08	11:00:00	32.3125	42.5	32.3125	44.0625	32.3125	46.125	32.3125	32.75	32.3125	6.8125	32.3125	9.5625
2018-04-08	11:30:00	24.25	46.1875	24.25	43.9375	24.25	50	24.25	27.3125	24.25	1.75	24.25	11.8125
2018-04-08	12:00:00	10	38.6875	10	43.25	10	47.75	10	32.1875	10	3.5	10	3.75
2018-04-08	12:30:00	8.625	20.25	8.625	43.9375	8.625	47.5625	8.625	24.4375	8.625	9.1875	8.625	9.375
2018-04-08	13:00:00	8.9375	18.625	8.9375	48.0625	8.9375	52.8125	8.9375	24.0625	8.9375	6.375	8.9375	6.5
2018-04-08	13:30:00	8.9375	11.5	8.9375	45.5	8.9375	47.875	8.9375	16	8.9375	13.875	8.9375	4.25
2018-04-08	14:00:00	7.375	8.3125	7.375	39.25	7.375	51.3125	7.375	9.875	7.375	12.875	7.375	3.625
2018-04-08	14:30:00	3.375	12.375	3.375	19.8125	3.375	41.5	3.375	18.375	3.375	6.125	3.375	10.375
2018-04-08	15:00:00	10	9.75	10	17.3125	10	33.9375	10	4.0625	10	9.375	10	14.6875
2018-04-08	15:30:00	5.3125	2.4375	5.3125	9.375	5.3125	32.75	5.3125	4.5625	5.3125	7.25	5.3125	4.875
2018-04-08	16:00:00	4.875	6.9375	4.875	11.1875	4.875	15.4375	4.875	24.3125	4.875	11.5625	4.875	5.25
2018-04-08	16:30:00	3.1875	8.5625	3.1875	5.75	3.1875	8.625	3.1875	8.5	3.1875	9.75	3.1875	10.125
2018-04-08	17:00:00	1.6875	9.8125	1.6875	0.0625	1.6875	8.3125	1.6875	12.8125	1.6875	8.5625	1.6875	12.3125
2018-04-08	17:30:00	7.875	8.6875	7.875	5.25	7.875	12.1875	7.875	6.1875	7.875	11.875	7.875	8.3125
2018-04-08	18:00:00	9.75	1.75	9.75	6.125	9.75	10.375	9.75	17.5	9.75	12.8125	9.75	11.125
2018-04-08	18:30:00	5.6875	9	5.6875	12.375	5.6875	10.8125	5.6875	6.875	5.6875	15	5.6875	6.0625
2018-04-08	19:00:00	6.125	8.3125	6.125	10.25	6.125	13.75	6.125	10	6.125	17.375	6.125	10.1875
2018-04-08	19:30:00	6.9375	4.1875	6.9375	7.1875	6.9375	12.0625	6.9375	7.6875	6.9375	13.8125	6.9375	5.375
2018-04-08	20:00:00	3.875	12.3125	3.875	6.3125	3.875	10.9375	3.875	14.75	3.875	17.375	3.875	11.8125
2018-04-08	20:30:00	11.0625	10.5	11.0625	6.8125	11.0625	11.1875	11.0625	20.3125	11.0625	9.875	11.0625	15.625
2018-04-08	21:00:00	7.8125	14.9375	7.8125	12.4375	7.8125	8.625	7.8125	13.125	7.8125	12.5	7.8125	15.25
2018-04-08	21:30:00	1.6875	16.9375	1.6875	6.6875	1.6875	18	1.6875	16.4375	1.6875	5.4375	1.6875	14.6875
2018-04-08	22:00:00	14.3125	9.1875	14.3125	14.1875	14.3125	13.9375	14.3125	14.75	14.3125	5.5625	14.3125	15.375
2018-04-08	22:30:00	7.3125	14.875	7.3125	11.8125	7.3125	11.5	7.3125	11.9375	7.3125	18.1875	7.3125	8.875
2018-04-08	23:00:00	10.5625	11.8125	10.5625	27.1875	10.5625	21.4375	10.5625	12.6875	10.5625	19.625	10.5625	19.5625
2018-04-08	23:30:00	7.625	11.625	7.625	11.875	7.625	9.5	7.625	13.0625	7.625	15.1875	7.625	12.0625
2018-04-09	00:00:00	5.375	11.5625	5.375	17.4375	5.375	21	5.375	14.5625	5.375	20.75	5.375	8
2018-04-09	00:30:00	6.625	20.1875	6.625	12.125	6.625	11.125	6.625	13.8125	6.625	20.1875	6.625	11.375
2018-04-09	01:00:00	11.5	17.1875	11.5	13	11.5	13.625	11.5	24.0625	11.5	21.25	11.5	15.6875
2018-04-09	01:30:00	16.6875	20.125	16.6875	16.875	16.6875	21.5	16.6875	20	16.6875	19.6875	16.6875	17.75
2018-04-09	02:00:00	7.375	16.25	7.375	15.375	7.375	17.1875	7.375	12.8125	7.375	37.375	7.375	23.5
2018-04-09	02:30:00	12	16.1875	12	14.75	12	22.625	12	19.75	12	28.125	12	27.6875
2018-04-09	03:00:00	16.625	10.3125	16.625	10.75	16.625	28.4375	16.625	22.75	16.625	40	16.625	26.375
2018-04-09	03:30:00	31.25	23.625	31.25	12	31.25	15.5625	31.25	20.625	31.25	28.3125	31.25	18.875
2018-04-09	04:00:00	22.125	28.875	22.125	11.625	22.125	22.625	22.125	22.375	22.125	32.8125	22.125	34.5
2018-04-09	04:30:00	27.3125	22.5	27.3125	12.125	27.3125	18.5	27.3125	30.0625	27.3125	31	27.3125	30.25
2018-04-09	05:00:00	22.1875	22.0625	22.1875	19.6875	22.1875	24.1875	22.1875	27.4375	22.1875	30.6875	22.1875	33.1875
2018-04-09	05:30:00	18.6875	29.4375	18.6875	25.8125	18.6875	12.9375	18.6875	23.5	18.6875	37.9375	18.6875	35.9375
2018-04-09	06:00:00	34.625	25.1875	34.625	14.25	34.625	21.9375	34.625	32.9375	34.625	30.9375	34.625	34.9375
2018-04-09	06:30:00	33.4375	34.6875	33.4375	19.1875	33.4375	23.1875	33.4375	29.9375	33.4375	35.125	33.4375	39.625
2018-04-09	07:00:00	25.1875	30.5	25.1875	22.8125	25.1875	33.75	25.1875	27.3125	25.1875	39.0625	25.1875	31.0625
2018-04-09	07:30:00	28.25	43.5	28.25	26.6875	28.25	24.0625	28.25	30.125	28.25	38.3125	28.25	38.5625
2018-04-09	08:00:00	30.1875	37.125	30.1875	37.125	30.1875	32.3125	30.1875	35.3125	30.1875	34.3125	30.1875	40.0625
2018-04-09	08:30:00	28.25	34.875	28.25	33.625	28.25	34.8125	28.25	36.4375	28.25	34.125	28.25	34.6875
2018-04-09	09:00:00	29.5	41.75	29.5	38.4375	29.5	41.9375	29.5	36.875	29.5	27.9375	29.5	35.9375
2018-04-09	09:30:00	30.75	41.3125	30.75	37.625	30.75	30.5625	30.75	38.9375	30.75	27.8125	30.75	31.125
2018-04-09	10:00:00	26.5	38.5625	26.5	40.375	26.5	35.3125	26.5	36.0625	26.5	17.25	26.5	34.625
2018-04-09	10:30:00	22.375	41.625	22.375	47.6875	22.375	33.125	22.375	31.4375	22.375	6.75	22.375	22.3125
2018-04-09	11:00:00	17.5625	44.4375	17.5625	37.875	17.5625	42.9375	17.5625	32.875	17.5625	10.8125	17.5625	7.3125
2018-04-09	11:30:00	15.375	33.5	15.375	36.9375	15.375	39.6875	15.375	30.0625	15.375	3.9375	15.375	11.875
2018-04-09	12:00:00	10	28.625	10	42.5625	10	38.25	10	25.5625	10	5.9375	10	10.0625
2018-04-09	12:30:00	11.75	25.375	11.75	41.25	11.75	44.6875	11.75	20.375	11.75	0.0625	11.75	11.6875
2018-04-09	13:00:00	0.5625	29.25	0.5625	39.5625	0.5625	46.9375	0.5625	19.8125	0.5625	10.875	0.5625	12
2018-04-09	13:30:00	7.9375	13.4375	7.9375	42.125	7.9375	39.5	7.9375	15.875	7.9375	9.0625	7.9375	10.1875
2018-04-09	14:00:00	5.75	10.625	5.75	35.25	5.75	40.25	5.75	10	5.75	7.75	5.75	9.125
2018-04-09	14:30:00	9.8125	12.75	9.8125	25.4375	9.8125	32.625	9.8125	18.6875	9.8125	12.0625	9.8125	6.75
2018-04-09	15:00:00	7.25	16.75	7.25	18.0625	7.25	27.875	7.25	9.5	7.25	6.4375	7.25	6.5
2018-04-09	15:30:00	8.5	7.125	8.5	12.625	8.5	29.8125	8.5	5.6875	8.5	5.3125	8.5	6.25
2018-04-09	16:00:00	2.4375	6.625	2.4375	6.8125	2.4375	19.5	2.4375	5.8125	2.4375	10.25	2.4375	17
2018-04-09	16:30:00	0.125	15	0.125	6.375	0.125	10.9375	0.125	12.5625	0.125	8.25	0.125	13.75
2018-04-09	17:00:00	0	4.125	0	11.75	0	7.625	0	6.6875	0	9.5625	0	10
2018-04-09	17:30:00	3.375	10	3.375	10.25	3.375	1.1875	3.375	7.8125	3.375	14.125	3.375	2.125
2018-04-09	18:00:00	5.125	7.0625	5.125	5.6875	5.125	9.5625	5.125	10.5	5.125	24.5	5.125	6.0625
2018-04-09	18:30:00	3.1875	12.0625	3.1875	6.625	3.1875	2.4375	3.1875	8.4375	3.1875	19.9375	3.1875	17.125
2018-04-09	19:00:00	12.0625	5	12.0625	2.6875	12.0625	7.1875	12.0625	12.9375	12.0625	11.4375	12.0625	22.5625
2018-04-09	19:30:00	10.125	11.6875	10.125	9.875	10.125	17.9375	10.125	5.5625	10.125	14.0625	10.125	13.6875
2018-04-09	20:00:00	8.0625	18.8125	8.0625	4	8.0625	7.9375	8.0625	7.25	8.0625	12.625	8.0625	5.375
2018-04-09	20:30:00	3.6875	15.4375	3.6875	7.625	3.6875	10.25	3.6875	11.8125	3.6875	13.6875	3.6875	15.875
2018-04-09	21:00:00	12	9.25	12	10.125	12	9.25	12	18.25	12	10.875	12	14.6875
2018-04-09	21:30:00	8.75	13.875	8.75	13.0625	8.75	5	8.75	13.0625	8.75	10.25	8.75	5.9375
2018-04-09	22:00:00	13.875	13.3125	13.875	10.8125	13.875	5.1875	13.875	11.6875	13.875	18.625	13.875	10.4375
2018-04-09	22:30:00	9.25	22.8125	9.25	18.5625	9.25	4.25	9.25	16.875	9.25	20.75	9.25	22.875
2018-04-09	23:00:00	12.875	15.0625	12.875	21.0625	12.875	11.0625	12.875	19.75	12.875	10.875	12.875	20.375
2018-04-09	23:30:00	11.6875	15.5625	11.6875	15.625	11.6875	17.1875	11.6875	17.25	11.6875	18.0625	11.6875	11.1875
2018-04-10	00:00:00	9	21.9375	9	16.6875	9	19.4375	9	10.625	9	23.8125	9	18.5
2018-04-10	00:30:00	7.625	17.5	7.625	14.0625	7.625	8.625	7.625	10	7.625	8.4375	7.625	15.25
2018-04-10	01:00:00	5.25	13.0625	5.25	6.5625	5.25	11.9375	5.25	9.125	5.25	20.25	5.25	23.75
2018-04-10	01:30:00	12.375	16.625	12.375	14.9375	12.375	12	12.375	18.125	12.375	19.6875	12.375	28.875
2018-04-10	02:00:00	7.625	20.9375	7.625	21.6875	7.625	22	7.625	14.25	7.625	16.25	7.625	19.375
2018-04-10	02:30:00	7.625	15.1875	7.625	11.9375	7.625	21.8125	7.625	14.125	7.625	27.875	7.625	22.5625
2018-04-10	03:00:00	12.125	21.125	12.125	12.5	12.125	6.75	12.125	17.125	12.125	34.875	12.125	23.0625
2018-04-10	03:30:00	24.625	24	24.625	14.1875	24.625	15.8125	24.625	16.125	24.625	24.8125	24.625	24.125
2018-04-10	04:00:00	20.9375	14.625	20.9375	13.5	20.9375	18.1875	20.9375	23.4375	20.9375	24.875	20.9375	30.1875
2018-04-10	04:30:00	19.75	20.8125	19.75	16.1875	19.75	14.25	19.75	23.5	19.75	30.625	19.75	36.125
2018-04-10	05:00:00	11.6875	18.625	11.6875	9.3125	11.6875	13.625	11.6875	28.5	11.6875	31.75	11.6875	35.4375
2018-04-10	05:30:00	19.9375	14.9375	19.9375	16.5625	19.9375	13.875	19.9375	25.875	19.9375	30.75	19.9375	25.625
2018-04-10	06:00:00	22	24.5625	22	23.5	22	8.0625	22	28	22	31.5625	22	32.8125
2018-04-10	06:30:00	27.375	29.4375	27.375	19.5	27.375	25.625	27.375	30.875	27.375	35.5	27.375	43.8125
2018-04-10	07:00:00	27.3125	29.4375	27.3125	29.25	27.3125	26.125	27.3125	30.0625	27.3125	35.5	27.3125	31.0625
2018-04-10	07:30:00	29.875	30.125	29.875	30.6875	29.875	28.5625	29.875	29.5	29.875	31.6875	29.875	36.9375
2018-04-10	08:00:00	25.4375	27.1875	25.4375	27.5625	25.4375	18.3125	25.4375	27.5625	25.4375	32.25	25.4375	31.0625
2018-04-10	08:30:00	20.125	27.5625	20.125	32.5	20.125	34.25	20.125	31.625	20.125	30.125	20.125	39.8125
2018-04-10	09:00:00	26.25	29.375	26.25	28.8125	26.25	28.5625	26.25	32.75	26.25	26.8125	26.25	37.875
2018-04-10	09:30:00	28.4375	34.8125	28.4375	39.3125	28.4375	32.9375	28.4375	32.625	28.4375	25	28.4375	25.875
2018-04-10	10:00:00	25.375	29.8125	25.375	36.125	25.375	39.125	25.375	30.375	25.375	26.0625	25.375	38.25
2018-04-10	10:30:00	21.9375	32.125	21.9375	46.8125	21.9375	34.25	21.9375	29.5625	21.9375	15.375	21.9375	21.1875
2018-04-10	11:00:00	16.5625	36.3125	16.5625	43.25	16.5625	32.875	16.5625	25.625	16.5625	13.25	16.5625	15.625
2018-04-10	11:30:00	17.0625	35.1875	17.0625	44.3125	17.0625	40	17.0625	28.3125	17.0625	10.625	17.0625	21.6875
2018-04-10	12:00:00	12.0625	22.25	12.0625	41.8125	12.0625	37.1875	12.0625	21.25	12.0625	1.625	12.0625	9.25
2018-04-10	12:30:00	5.875	25.4375	5.875	37.1875	5.875	44.5	5.875	18.1875	5.875	8.125	5.875	12.25
2018-04-10	13:00:00	9.25	17.0625	9.25	43	9.25	40.75	9.25	16.5625	9.25	10.375	9.25	6.9375
2018-04-10	13:30:00	9.9375	21.3125	9.9375	36.375	9.9375	35.8125	9.9375	21	9.9375	6.8125	9.9375	7.8125
2018-04-10	14:00:00	7.1875	11.5625	7.1875	36.5	7.1875	38.875	7.1875	9.75	7.1875	2.5	7.1875	11
2018-04-10	14:30:00	4.75	7.4375	4.75	31.5625	4.75	36.5	4.75	14.3125	4.75	7.125	4.75	9.375
2018-04-10	15:00:00	6	18.375	6	19.25	6	33.625	6	7.9375	6	6.125	6	11.6875
2018-04-10	15:30:00	3.25	1.625	3.25	16.875	3.25	24.375	3.25	9.8125	3.25	5.5625	3.25	4.4375
2018-04-10	16:00:00	5.125	6.75	5.125	14.875	5.125	23.0625	5.125	4.0625	5.125	7.8125	5.125	7.4375
2018-04-10	16:30:00	5.0625	2.4375	5.0625	11.0625	5.0625	11.8125	5.0625	7.125	5.0625	9.9375	5.0625	6.4375
2018-04-10	17:00:00	6.9375	4.125	6.9375	12.375	6.9375	7	6.9375	6.5	6.9375	16.5	6.9375	0.3125
2018-04-10	17:30:00	7.25	7.125	7.25	15	7.25	31	7.25	4.125	7.25	8.125	7.25	4
2018-04-10	18:00:00	4.6875	1.4375	4.6875	7.9375	4.6875	3.3125	4.6875	9.375	4.6875	19.125	4.6875	12.1875
2018-04-10	18:30:00	4.9375	3.6875	4.9375	8.1875	4.9375	2.875	4.9375	9.5625	4.9375	7.0625	4.9375	11.5625
2018-04-10	19:00:00	5.0625	4.0625	5.0625	11.125	5.0625	2.5	5.0625	8.125	5.0625	18.5625	5.0625	16.25
2018-04-10	19:30:00	4.0625	7	4.0625	5.0625	4.0625	9.75	4.0625	7.8125	4.0625	19.8125	4.0625	7.25
2018-04-10	20:00:00	8.1875	9.125	8.1875	8.0625	8.1875	13.6875	8.1875	11.8125	8.1875	13.6875	8.1875	18.4375
2018-04-10	20:30:00	11.1875	5.875	11.1875	7.0625	11.1875	9.375	11.1875	10.5625	11.1875	18.375	11.1875	10.0625
2018-04-10	21:00:00	5.6875	4.125	5.6875	7.9375	5.6875	8.25	5.6875	11.375	5.6875	2.625	5.6875	9.9375
2018-04-10	21:30:00	5.0625	8.5	5.0625	9.3125	5.0625	11	5.0625	8.5	5.0625	11.875	5.0625	12.0625
2018-04-10	22:00:00	16.1875	7.625	16.1875	13.6875	16.1875	8.9375	16.1875	11.5625	16.1875	19.375	16.1875	13.625
2018-04-10	22:30:00	5.9375	15.1875	5.9375	15.0625	5.9375	7.75	5.9375	9.4375	5.9375	10.125	5.9375	13.9375
2018-04-10	23:00:00	8.375	7.75	8.375	10.5625	8.375	17.125	8.375	9.4375	8.375	6.9375	8.375	7.625
2018-04-10	23:30:00	7.8125	14.125	7.8125	8.3125	7.8125	17.5625	7.8125	5.9375	7.8125	11	7.8125	11.875
2018-04-11	00:00:00	7.0625	11.375	7.0625	23.0625	7.0625	14.0625	7.0625	13.75	7.0625	16.375	7.0625	14.3125
2018-04-11	00:30:00	14.4375	17.875	14.4375	14.0625	14.4375	16.9375	14.4375	8.8125	14.4375	14.1875	14.4375	13.0625
2018-04-11	01:00:00	13.5	15.125	13.5	10.75	13.5	16.4375	13.5	7.1875	13.5	21	13.5	18.5
2018-04-11	01:30:00	13.375	7.4375	13.375	11.4375	13.375	20.5625	13.375	13.8125	13.375	32.125	13.375	20.5
2018-04-11	02:00:00	9.0625	5.4375	9.0625	16.625	9.0625	16.9375	9.0625	8.5	9.0625	14.4375	9.0625	23.9375
2018-04-11	02:30:00	12.5625	10.1875	12.5625	22.5625	12.5625	16.625	12.5625	8.375	12.5625	16.0625	12.5625	10.125
2018-04-11	03:00:00	15.5625	5.6875	15.5625	13.75	15.5625	9.0625	15.5625	14.375	15.5625	35.4375	15.5625	16.6875
2018-04-11	03:30:00	7.375	11.875	7.375	18.125	7.375	18.6875	7.375	17.125	7.375	26.4375	7.375	23
2018-04-11	04:00:00	21.875	22.8125	21.875	12.8125	21.875	10.125	21.875	9.6875	21.875	24.875	21.875	21.5625
2018-04-11	04:30:00	26	18.75	26	11.8125	26	9.5625	26	18.4375	26	35.75	26	17.75
2018-04-11	05:00:00	18.3125	9.6875	18.3125	12.25	18.3125	20.9375	18.3125	20.4375	18.3125	30.25	18.3125	26.4375
2018-04-11	05:30:00	28	23.875	28	17.6875	28	7.625	28	14.5625	28	31.25	28	15.625
2018-04-11	06:00:00	28.5625	20.1875	28.5625	22.3125	28.5625	15	28.5625	17.0625	28.5625	28.8125	28.5625	27.5
2018-04-11	06:30:00	25.3125	20.625	25.3125	24.1875	25.3125	23.4375	25.3125	19.3125	25.3125	34	25.3125	26.1875
2018-04-11	07:00:00	21.5	19.625	21.5	18.875	21.5	16.5625	21.5	23.9375	21.5	33.6875	21.5	25.5
2018-04-11	07:30:00	29.25	28.625	29.25	28.25	29.25	19.75	29.25	22.75	29.25	26	29.25	21.8125
2018-04-11	08:00:00	28.4375	20.8125	28.4375	26.625	28.4375	17.1875	28.4375	20.25	28.4375	34.3125	28.4375	31.0625
2018-04-11	08:30:00	27.125	35.6875	27.125	28.4375	27.125	15.375	27.125	26.1875	27.125	28.3125	27.125	23.375
2018-04-11	09:00:00	26.0625	27.75	26.0625	24.375	26.0625	40.8125	26.0625	25.625	26.0625	20.1875	26.0625	23.625
2018-04-11	09:30:00	26.625	27.1875	26.625	29.1875	26.625	34.5	26.625	24.6875	26.625	23.0625	26.625	23.5625
2018-04-11	10:00:00	30.6875	30.5	30.6875	30.125	30.6875	34.3125	30.6875	19.9375	30.6875	15.375	30.6875	12.875
2018-04-11	10:30:00	14.8125	32.6875	14.8125	27.3125	14.8125	35.1875	14.8125	21.75	14.8125	10.9375	14.8125	20.8125
2018-04-11	11:00:00	21.875	28.9375	21.875	29	21.875	31.5	21.875	21.4375	21.875	16.6875	21.875	14.4375
2018-04-11	11:30:00	14.9375	24.75	14.9375	35.875	14.9375	33.3125	14.9375	21.0625	14.9375	4.0625	14.9375	7.125
2018-04-11	12:00:00	15.25	32.6875	15.25	36.875	15.25	34.75	15.25	14.3125	15.25	3.0625	15.25	14.9375
2018-04-11	12:30:00	9.5	21.0625	9.5	37.125	9.5	33.9375	9.5	16.875	9.5	4.9375	9.5	7.125
2018-04-11	13:00:00	8.875	18.8125	8.875	28.125	8.875	36.875	8.875	17.125	8.875	12	8.875	5.5625
2018-04-11	13:30:00	12.0625	17.625	12.0625	30.125	12.0625	33.75	12.0625	11.125	12.0625	3.25	12.0625	6.125
2018-04-11	14:00:00	14.1875	13.0625	14.1875	22.875	14.1875	31.625	14.1875	9.3125	14.1875	2.125	14.1875	4.4375
2018-04-11	14:30:00	8.25	6.6875	8.25	23.625	8.25	30	8.25	5.9375	8.25	3.125	8.25	4.4375
2018-04-11	15:00:00	5.3125	6.5	5.3125	16.875	5.3125	24.5	5.3125	9.1875	5.3125	9.0625	5.3125	8.5
2018-04-11	15:30:00	8.3125	6.125	8.3125	13.875	8.3125	22.625	8.3125	3.4375	8.3125	4.1875	8.3125	3.125

## Sheet: RNAi 3
Graphs show behavior in DD
LD: 31-Mar-18 to 5-Apr-18
DD: 6-Apr-18 to 11-Apr-18
PsiRNAiKK/+
	Time	No Light Pulse	ZT13 Pulse	No Light Pulse	ZT15 Pulse	No Light Pulse	ZT17 Pulse	No Light Pulse	ZT19 Pulse	No Light Pulse	ZT21 Pulse	No Light Pulse	ZT23 Pulse
2018-03-31	00:00:00	9.375	12.1875	9.375	8.6875	9.375	12.8125	9.375	18.0625	9.375	11.625	9.375	25.25
2018-03-31	00:30:00	7.875	4.125	7.875	1.25	7.875	6.375	7.875	15.4375	7.875	4.75	7.875	14.5
2018-03-31	01:00:00	1.5625	5.375	1.5625	1.875	1.5625	4.8125	1.5625	7.375	1.5625	4.75	1.5625	5.5625
2018-03-31	01:30:00	4.375	0.0625	4.375	3.875	4.375	0.875	4.375	3	4.375	3.3125	4.375	8.1875
2018-03-31	02:00:00	0.875	1.3125	0.875	3.25	0.875	7.75	0.875	5.5	0.875	5.25	0.875	4.75
2018-03-31	02:30:00	0.9375	1.25	0.9375	3.1875	0.9375	2.5625	0.9375	1.0625	0.9375	5.125	0.9375	6
2018-03-31	03:00:00	6.3125	5.125	6.3125	8.0625	6.3125	8.4375	6.3125	1.125	6.3125	2.3125	6.3125	6.5
2018-03-31	03:30:00	2.25	6.8125	2.25	6.8125	2.25	3.8125	2.25	5.4375	2.25	4.5625	2.25	7.6875
2018-03-31	04:00:00	2.5625	5.9375	2.5625	7.6875	2.5625	11.25	2.5625	4.1875	2.5625	6.75	2.5625	4.75
2018-03-31	04:30:00	0.8125	5.625	0.8125	3.75	0.8125	6.625	0.8125	5.625	0.8125	9.0625	0.8125	6.25
2018-03-31	05:00:00	4.1875	1.125	4.1875	3.875	4.1875	4.8125	4.1875	9.5625	4.1875	5.25	4.1875	16.75
2018-03-31	05:30:00	2.5625	7	2.5625	6.375	2.5625	3.625	2.5625	11.3125	2.5625	5.375	2.5625	14.25
2018-03-31	06:00:00	2	5.9375	2	3.875	2	3.875	2	7.0625	2	5.0625	2	16.0625
2018-03-31	06:30:00	6.1875	4.875	6.1875	9.875	6.1875	14.25	6.1875	2.5625	6.1875	7.8125	6.1875	9.4375
2018-03-31	07:00:00	0.5625	9.375	0.5625	8.9375	0.5625	14.125	0.5625	4.125	0.5625	11.5625	0.5625	5.5625
2018-03-31	07:30:00	3.0625	8.6875	3.0625	8.1875	3.0625	9.8125	3.0625	3.3125	3.0625	1.9375	3.0625	11.4375
2018-03-31	08:00:00	10.75	4.625	10.75	7	10.75	6.5	10.75	13.1875	10.75	88.5	10.75	7.5625
2018-03-31	08:30:00	83	96.875	83	96.0625	83	94.3125	83	94.9375	83	30.5625	83	103.062
2018-03-31	09:00:00	35.6875	25.9375	35.6875	37.8125	35.6875	39.3125	35.6875	41.625	35.6875	0.25	35.6875	49.1875
2018-03-31	09:30:00	1.5625	0.8125	1.5625	5.5625	1.5625	5.5	1.5625	5.875	1.5625	0.0625	1.5625	0
2018-03-31	10:00:00	0.0625	0	0.0625	2.25	0.0625	0.25	0.0625	0.0625	0.0625	0	0.0625	0
2018-03-31	10:30:00	0.0625	1.4375	0.0625	0	0.0625	0.0625	0.0625	0	0.0625	0	0.0625	0
2018-03-31	11:00:00	0.125	0.625	0.125	0.375	0.125	1.3125	0.125	0	0.125	0.3125	0.125	0
2018-03-31	11:30:00	0.0625	0.125	0.0625	0.1875	0.0625	0.125	0.0625	0.125	0.0625	0	0.0625	0.9375
2018-03-31	12:00:00	0.625	5.5	0.625	0.1875	0.625	1.125	0.625	0.8125	0.625	0	0.625	0
2018-03-31	12:30:00	0.8125	10.625	0.8125	2.0625	0.8125	3.875	0.8125	3.8125	0.8125	3	0.8125	0
2018-03-31	13:00:00	10.5	4.125	10.5	9.5625	10.5	0.875	10.5	2.625	10.5	0	10.5	0
2018-03-31	13:30:00	9.125	3.375	9.125	6.0625	9.125	0.375	9.125	1	9.125	1.9375	9.125	0
2018-03-31	14:00:00	2.625	8.25	2.625	13.3125	2.625	14.125	2.625	7.75	2.625	11.4375	2.625	0.5
2018-03-31	14:30:00	3.25	1.375	3.25	4.4375	3.25	9.75	3.25	5.3125	3.25	7.5	3.25	7.375
2018-03-31	15:00:00	5.8125	1.8125	5.8125	13.125	5.8125	2.9375	5.8125	13.375	5.8125	2.0625	5.8125	1.4375
2018-03-31	15:30:00	1.125	1.8125	1.125	2.6875	1.125	0.625	1.125	7.8125	1.125	3.5	1.125	3.375
2018-03-31	16:00:00	4	3	4	12.9375	4	7.875	4	8.6875	4	8.875	4	17.25
2018-03-31	16:30:00	2.0625	19.3125	2.0625	14.6875	2.0625	2.125	2.0625	6.375	2.0625	12.75	2.0625	7.6875
2018-03-31	17:00:00	9.875	10.4375	9.875	11.5	9.875	13.375	9.875	0.4375	9.875	4.25	9.875	14.25
2018-03-31	17:30:00	12.5	15.5	12.5	12.6875	12.5	3.6875	12.5	11.5	12.5	10.0625	12.5	6.5
2018-03-31	18:00:00	17.1875	15.3125	17.1875	11.0625	17.1875	22.4375	17.1875	11.625	17.1875	17.5	17.1875	1.6875
2018-03-31	18:30:00	15.25	4.875	15.25	16.9375	15.25	18.125	15.25	20.1875	15.25	23.75	15.25	24.6875
2018-03-31	19:00:00	24.625	26.5	24.625	31.8125	24.625	24.125	24.625	18.625	24.625	24.875	24.625	28.125
2018-03-31	19:30:00	34.5	25.3125	34.5	31.875	34.5	33.6875	34.5	24.8125	34.5	12.125	34.5	23.8125
2018-03-31	20:00:00	30	30	30	31.0625	30	22.8125	30	21	30	49.75	30	9.625
2018-03-31	20:30:00	23.5625	46.8125	23.5625	54.1875	23.5625	48.25	23.5625	58.875	23.5625	22.0625	23.5625	57.625
2018-03-31	21:00:00	7.875	21.75	7.875	24.25	7.875	12.5	7.875	37.375	7.875	13.6875	7.875	21.8125
2018-03-31	21:30:00	5.0625	13.375	5.0625	7.25	5.0625	18.8125	5.0625	17.3125	5.0625	8.125	5.0625	10.875
2018-03-31	22:00:00	3.625	2.0625	3.625	8.875	3.625	7.125	3.625	12.1875	3.625	9.4375	3.625	7.625
2018-03-31	22:30:00	0.8125	10.8125	0.8125	4.4375	0.8125	6	0.8125	10.75	0.8125	2.9375	0.8125	6
2018-03-31	23:00:00	2.5	2.6875	2.5	3.5625	2.5	1.8125	2.5	4.25	2.5	3.25	2.5	2.1875
2018-03-31	23:30:00	0.3125	3.875	0.3125	3.9375	0.3125	7	0.3125	1.625	0.3125	0	0.3125	4.0625
2018-04-01	00:00:00	2.875	4.75	2.875	3.125	2.875	7.5	2.875	4	2.875	0.5	2.875	1.5
2018-04-01	00:30:00	4.25	1.125	4.25	1.5	4.25	0.1875	4.25	3.5625	4.25	0	4.25	0.0625
2018-04-01	01:00:00	12.5	1.5	12.5	0	12.5	0.1875	12.5	2.375	12.5	0	12.5	0.1875
2018-04-01	01:30:00	2.375	0.25	2.375	2.1875	2.375	0.3125	2.375	1.0625	2.375	0	2.375	0.375
2018-04-01	02:00:00	1.25	1.3125	1.25	0	1.25	0	1.25	0.375	1.25	0.5625	1.25	3.375
2018-04-01	02:30:00	7.875	0.1875	7.875	1.375	7.875	0.3125	7.875	1.375	7.875	3.75	7.875	0.5
2018-04-01	03:00:00	0.625	0.8125	0.625	1.5	0.625	0.375	0.625	0.3125	0.625	2.0625	0.625	0.0625
2018-04-01	03:30:00	4.125	0.625	4.125	5.4375	4.125	0.25	4.125	0.625	4.125	0.75	4.125	1.3125
2018-04-01	04:00:00	4.875	0.0625	4.875	1.9375	4.875	1.5625	4.875	0.25	4.875	2.4375	4.875	5.9375
2018-04-01	04:30:00	6.9375	1.9375	6.9375	3.6875	6.9375	0.3125	6.9375	1.25	6.9375	7.8125	6.9375	1.3125
2018-04-01	05:00:00	20.125	6.1875	20.125	7.1875	20.125	3.6875	20.125	7.0625	20.125	11	20.125	12.3125
2018-04-01	05:30:00	27.875	4.125	27.875	5.5625	27.875	5.5	27.875	12.625	27.875	18.5625	27.875	16.9375
2018-04-01	06:00:00	38.625	18.375	38.625	20.0625	38.625	18.1875	38.625	21.1875	38.625	28.625	38.625	37.5625
2018-04-01	06:30:00	49.6875	25.0625	49.6875	34.625	49.6875	32.1875	49.6875	27.5625	49.6875	53.4375	49.6875	58.375
2018-04-01	07:00:00	59	37.6875	59	42.6875	59	49.5625	59	45	59	58.3125	59	70.0625
2018-04-01	07:30:00	63.5	48	63.5	51	63.5	63.6875	63.5	52.6875	63.5	57.6875	63.5	71.25
[truncated: 495 more rows]

## Sheet: Psi KD 3
Graphs show behavior in DD
LD: 31-Mar-18 to 5-Apr-18
[truncated: 562 more rows]

## Sheet: TD2 4
Graphs show behavior in DD
[truncated: 628 more rows]

[truncated: 3 more sheets: RNAi 4, Psi KD 4, Quantification]
