# Supplementary material for: Drosophila PSI controls circadian period and the phase of circadian behavior under temperature cycle via tim splicing
Source: eLife journal article supplement (doi:10.7554/elife.50063), 2019-11-08
Supplement: supp [file elife-50063-supp-v1.zip › elife_poa_e50063_Figure_3_figure_supplement_3_source_data_2.xlsx]

## Sheet: Figure 3-S3
	TD2/+			PsiRNAiKK/+			TD2/PsiRNAiKK
	Mean	SEM	N (runs)	Mean	SEM	N (runs)	Mean	SEM	N (runs)
ZT13	-1.4375	0.445366	4	-1.95833	0.42831	4	-2.14583	0.21075	4
ZT15	-3.25	0.228218	4	-3.77083	0.415798	4	-3.22917	0.394369	4
ZT17	-3.7	0.352832	4	-4	0.35843	4	-2.85417	0.374807	4
ZT19	0.125	0.199826	4	0.270833	0.190561	4	0.916667	0.233234	4
ZT21	2	0.155902	4	1.5625	0.12442	4	1.35417	0.216172	4
ZT23	1.30556	0.216951	3	1.27778	0.414811	3	0.666667	0.346944	3
Two-way ANOVA	Ordinary
Source of Variation	% of total variation	P value	P value summary	Significant?
Interaction	2	0.0922	ns	No
Time point	91.86	<0.0001	****	Yes
Genotype	0.2964	0.28	ns	No
