# Supplementary material for: Drosophila PSI controls circadian period and the phase of circadian behavior under temperature cycle via tim splicing
Source: eLife journal article supplement (doi:10.7554/elife.50063), 2019-11-08
Supplement: supp [file elife-50063-supp-v1.zip › elife_poa_e50063_Figure_3_source_data_1.xlsx]

## Sheet: Figure 3 A B C
tim-sc Isoform
		tim-sc Relative expression (AU): Values are normalized to the average of all PsiRNAiKK/TD2 timepoints
Time point	Genotype	Experiment 1	Experiment 2	Experiment 3	Experiment 4	Experiment 5	Average	SEM
CT3	TD2/+			0.140096	0.214231	0.376333	0.243554	0.0697538
CT9				1.05335	1.11475	0.801898	0.990002	0.0957078
CT15				1.27731	1.11351	1.54909	1.3133	0.127022
CT21				0.469082	0.538877	0.852776	0.620245	0.117998
CT3	RNAi/+	0.222843	0.151166	0.108334			0.160781	0.0334036
CT9		1.03881	0.708483	1.02675			0.924681	0.108155
CT15		1.34641	1.295	1.24061			1.29401	0.0305438
CT21		0.59271	0.668979	0.387014			0.549568	0.0842062
CT3	RNAi/TD2	0.314572	0.269534	0.322524	0.367102	0.380195	0.330785	0.0198029
CT9		1.14423	1.1692	1.25124	1.31389	1.16507	1.20873	0.0320118
CT15		1.79938	1.73294	1.87859	1.70042	1.65227	1.75272	0.039521
CT21		0.741814	0.828326	0.547646	0.618582	0.802466	0.707767	0.0539695
tim-cold Isoform
		tim-cold Relative expression (AU): Values are normalized to the average of all PsiRNAiKK/TD2 timepoints
Time point	Genotype	Experiment 1	Experiment 2	Experiment 3	Experiment 4	Experiment 5	Average	SEM
CT3	TD2/+			0.402182	0.293685	0.192443	0.296103	0.0605583
CT9				0.876423	0.941486	0.800252	0.87272	0.0408128
CT15				1.84687	1.63501	1.08724	1.52304	0.226321
CT21				0.881012	0.851947	0.435634	0.722864	0.14386
CT3	RNAi/+	0.121149	0.0889703	0.220818			0.143646	0.0396885
CT9		0.969094	0.859716	0.821059			0.88329	0.0443296
CT15		1.15965	1.14973	1.5519			1.28709	0.132434
CT21		0.283252	0.324953	0.611417			0.40654	0.103143
CT3	RNAi/TD2	0.309097	0.33079	0.322569	0.301275	0.375837	0.327914	0.0130329
CT9		1.29261	1.16374	1.1203	1.11608	0.991587	1.13686	0.0483685
CT15		1.71034	1.82945	1.76449	1.79124	1.88519	1.79614	0.029518
CT21		0.687954	0.676014	0.792646	0.791402	0.74739	0.739081	0.0247661
tim-M Isoform
		tim-M Relative expression (AU): Values are normalized to the average of all PsiRNAiKK/TD2 timepoints
Time point	Genotype	Experiment 1	Experiment 2	Experiment 3	Experiment 4	Experiment 5	Average	SEM
CT3	TD2/+			0.399266	0.756188	0.474124	0.543193	0.108668
CT9				2.00756	2.24289	1.6227	1.95771	0.180759
CT15				3.19381	2.62498	2.26777	2.69552	0.269643
CT21				1.33563	2.0917	1.14842	1.52525	0.288336
CT3	RNAi/+	0.236629	0.245954	0.316758			0.266447	0.0252993
CT9		1.85074	1.87128	1.84025			1.85409	0.00911083
CT15		2.42097	2.98864	3.42968			2.94643	0.291954
CT21		0.951845	1.26735	1.09948			1.10623	0.0911412
CT3	RNAi/TD2	0.258322	0.327829	0.542891	0.569222	0.321039	0.403861	0.0634412
CT9		1.24413	1.11107	1.25825	1.33601	0.929885	1.17587	0.0713435
CT15		1.94675	1.87323	1.77094	1.49284	1.9564	1.80803	0.0855061
CT21		0.550799	0.687867	0.427918	0.601922	0.792679	0.612237	0.0616985

## Sheet: Figure 3 D E F
tim-sc Isoform
			tim-sc Relative expression (AU): Values are normalized to the average of all PsiRNAiKK/TD2 timepoints
Temperature	Time point	Genotype	Experiment 1	Experiment 2	Experiment 3	Average	SEM
18°C	CT3	RNAi/+	0.206187	0.182167	0.259018	0.21579	0.0226987
	CT9		1.89154	1.13103	1.42591	1.48283	0.221375
	CT15		2.19408	2.18889	1.72788	2.03695	0.154541
	CT21		1.18892	0.997912	1.25855	1.14846	0.0779113
	CT3	RNAi/TD2	0.411694	0.371146	0.414202	0.399014	0.0139529
	CT9		1.99557	2.10859	2.25977	2.12131	0.076534
	CT15		3.15123	3.44398	3.10667	3.23396	0.105794
	CT21		1.29879	1.90797	1.9777	1.72815	0.215623
29°C	CT3	RNAi/+	0.0407937	0.0110696	0.0199823	0.0239486	0.0088068
	CT9		0.230993	0.0296728	0.0377855	0.0994839	0.0657965
	CT15		0.475902	0.0659564	0.0882013	0.21002	0.133096
	CT21		0.164996	0.0370215	0.0554796	0.0858324	0.0399389
	CT3	RNAi/TD2	0.0758167	0.0115458	0.0207582	0.0360403	0.0200653
	CT9		0.307946	0.0380118	0.0495853	0.131848	0.0881127
	CT15		0.529648	0.0835899	0.110098	0.241112	0.144471
	CT21		0.229304	0.0351674	0.0612071	0.10856	0.0608384
tim-cold Isoform
			tim-cold Relative expression (AU): Values are normalized to the average of all PsiRNAiKK/TD2 timepoints
Temperature	Time point	Genotype	Experiment 1	Experiment 2	Experiment 3	Average	SEM
18°C	CT3	RNAi/+	0.25953	0.220274	0.571302	0.350369	0.111046
	CT9		1.58894	2.25591	1.28362	1.70949	0.287074
	CT15		3.19245	2.08792	2.82728	2.70255	0.324893
	CT21		1.4217	1.1543	0.688531	1.08817	0.214213
	CT3	RNAi/TD2	0.463868	0.458588	0.479863	0.46744	0.00639591
	CT9		2.20594	2.86688	1.31564	2.12949	0.449434
	CT15		3.06858	2.2332	2.53178	2.61119	0.2444
	CT21		2.01365	1.21594	0.879385	1.36966	0.336334
29°C	CT3	RNAi/+	0.0125237	0.046503	0.0447403	0.034589	0.0110444
	CT9		0.0481464	0.230316	0.813272	0.363911	0.230752
	CT15		0.0931869	0.442645	0.604053	0.379962	0.150768
	CT21		0.0374501	0.186004	0.190432	0.137962	0.0502723
	CT3	RNAi/TD2	0.0197546	0.0702564	1.51335	0.534452	0.489664
	CT9		0.0684138	0.304654	0.437791	0.270286	0.108006
	CT15		0.103372	0.579885	0.513761	0.399006	0.149044
	CT21		0.0564188	0.270606	0.328436	0.218487	0.0827357
tim-M Isoform
			tim-M Relative expression (AU): Values are normalized to the average of all PsiRNAiKK/TD2 timepoints
Temperature	Time point	Genotype	Experiment 1	Experiment 2	Experiment 3	Average	SEM
18°C	CT3	RNAi/+	0.20438	0.256199	1.16588	0.542154	0.312223
	CT9		2.00314	1.34827	0.302173	1.21786	0.495337
	CT15		1.32848	0.611639	0.378476	0.772866	0.285846
	CT21		0.714451	0.522065	0.128071	0.454863	0.172576
	CT3	RNAi/TD2	0.221428	1.73871	0.890355	0.950164	0.439021
	CT9		1.27867	1.17756	0.205954	0.887395	0.341969
	CT15		1.20572	0.587294	0.612882	0.801966	0.202013
	CT21		0.524499	0.403833	0.310769	0.413034	0.0618697
29°C	CT3	RNAi/+	0.264907	0.28565	0.0634814	0.204679	0.0708525
	CT9		1.46439	0.81693	1.85432	1.37854	0.302528
	CT15		4.08031	1.94716	1.13817	2.38855	0.877526
	CT21		1.80711	0.952036	0.418581	1.05924	0.404403
	CT3	RNAi/TD2	0.296682	0.308886	3.76481	1.45679	1.15401
	CT9		1.15746	0.780898	1.02374	0.987366	0.110214
	CT15		2.06667	2.08119	0.695175	1.61435	0.459605
	CT21		1.24886	0.921633	0.496316	0.888938	0.217856
