# Supplementary material for: Drosophila PSI controls circadian period and the phase of circadian behavior under temperature cycle via tim splicing
Source: eLife journal article supplement (doi:10.7554/elife.50063), 2019-11-08
Supplement: supp [file elife-50063-supp-v1.zip › elife_poa_e50063_Figure_3_source_data_2.xlsx]

## Sheet: Figure 3
Figure 3B
	PsiRNAiKK/+			TD2/+			TD2/PsiRNAiKK
	Mean	SEM	N (runs)	Mean	SEM	N (runs)	Mean	SEM	N (runs)
CT 3	0.160781	0.0334036	3	0.243554	0.0697538	3	0.330785	0.0198028	5
CT 9	0.924681	0.108155	3	0.990002	0.0957078	3	1.20873	0.0320118	5
CT 15	1.29401	0.0305438	3	1.3133	0.127022	3	1.75272	0.039521	5
CT 21	0.549568	0.0842062	3	0.620245	0.117998	3	0.707767	0.0539695	5
Two-way ANOVA followed by:
Tukey's multiple comparisons test	Mean Diff.	95.00% CI of diff.	Significant?	Summary	Adjusted P Value
CT 3
PsiRNAiKK/+ vs. TD2/+	-0.08277	-0.3354 to 0.1699	No	ns	0.7026
PsiRNAiKK/+ vs. TD2/PsiRNAiKK	-0.17	-0.396 to 0.05597	No	ns	0.1703
TD2/+ vs. TD2/PsiRNAiKK	-0.08723	-0.3132 to 0.1387	No	ns	0.6141
CT 9
PsiRNAiKK/+ vs. TD2/+	-0.06532	-0.318 to 0.1873	No	ns	0.8018
PsiRNAiKK/+ vs. TD2/PsiRNAiKK	-0.284	-0.51 to -0.05808	Yes	*	0.0112
TD2/+ vs. TD2/PsiRNAiKK	-0.2187	-0.4447 to 0.007245	No	ns	0.0594
CT 15
PsiRNAiKK/+ vs. TD2/+	-0.0193	-0.2719 to 0.2333	No	ns	0.9808
PsiRNAiKK/+ vs. TD2/PsiRNAiKK	-0.4587	-0.6847 to -0.2327	Yes	****	<0.0001
TD2/+ vs. TD2/PsiRNAiKK	-0.4394	-0.6654 to -0.2134	Yes	***	0.0001
CT 21
PsiRNAiKK/+ vs. TD2/+	-0.07068	-0.3233 to 0.182	No	ns	0.7724
PsiRNAiKK/+ vs. TD2/PsiRNAiKK	-0.1582	-0.3842 to 0.06777	No	ns	0.2133
TD2/+ vs. TD2/PsiRNAiKK	-0.08752	-0.3135 to 0.1384	No	ns	0.6121
Figure 3D
	PsiRNAiKK/+			TD2/+			TD2/PsiRNAiKK
	Mean	SEM	N (runs)	Mean	SEM	N (runs)	Mean	SEM	N (runs)
CT 3	0.143646	0.0396885	3	0.296103	0.0605583	3	0.327914	0.0130329	5
CT 9	0.88329	0.0443296	3	0.87272	0.0408128	3	1.13686	0.0483685	5
CT 15	1.28709	0.132434	3	1.52304	0.226321	3	1.79614	0.029518	5
CT 21	0.40654	0.103143	3	0.722864	0.14386	3	0.739081	0.0247661	5
Two-way ANOVA followed by:
Tukey's multiple comparisons test	Mean Diff.	95.00% CI of diff.	Significant?	Summary	Adjusted P Value
CT 3
PsiRNAiKK/+ vs. TD2/+	-0.1525	-0.4563 to 0.1514	No	ns	0.4428
PsiRNAiKK/+ vs. TD2/PsiRNAiKK	-0.1843	-0.456 to 0.08747	No	ns	0.2335
TD2/+ vs. TD2/PsiRNAiKK	-0.03181	-0.3035 to 0.2399	No	ns	0.9555
CT 9
PsiRNAiKK/+ vs. TD2/+	0.01057	-0.2932 to 0.3144	No	ns	0.996
PsiRNAiKK/+ vs. TD2/PsiRNAiKK	-0.2536	-0.5253 to 0.01816	No	ns	0.0713
TD2/+ vs. TD2/PsiRNAiKK	-0.2641	-0.5359 to 0.007595	No	ns	0.0581
CT 15
PsiRNAiKK/+ vs. TD2/+	-0.2359	-0.5398 to 0.06787	No	ns	0.1527
PsiRNAiKK/+ vs. TD2/PsiRNAiKK	-0.5091	-0.7808 to -0.2373	Yes	***	0.0002
TD2/+ vs. TD2/PsiRNAiKK	-0.2731	-0.5448 to -0.001368	Yes	*	0.0487
CT 21
PsiRNAiKK/+ vs. TD2/+	-0.3163	-0.6201 to -0.01251	Yes	*	0.0399
PsiRNAiKK/+ vs. TD2/PsiRNAiKK	-0.3325	-0.6043 to -0.0608	Yes	*	0.0137
TD2/+ vs. TD2/PsiRNAiKK	-0.01622	-0.288 to 0.2555	No	ns	0.9882
Figure 3F
	PsiRNAiKK/+			TD2/+			TD2/PsiRNAiKK
	Mean	SEM	N (runs)	Mean	SEM	N (runs)	Mean	SEM	N (runs)
CT 3	0.266447	0.0252993	3	0.543193	0.108668	3	0.403861	0.0634412	5
CT 9	1.85409	0.00911082	3	1.95771	0.180759	3	1.17587	0.0713435	5
CT 15	2.94643	0.291954	3	2.69552	0.269643	3	1.80803	0.0855061	5
CT 21	1.10623	0.0911412	3	1.52525	0.288336	3	0.612237	0.0616985	5
Two-way ANOVA followed by:
Tukey's multiple comparisons test	Mean Diff.	95.00% CI of diff.	Significant?	Summary	Adjusted P Value
CT 3
PsiRNAiKK/+ vs. TD2/+	-0.2767	-0.7995 to 0.246	No	ns	0.405
PsiRNAiKK/+ vs. TD2/PsiRNAiKK	-0.1374	-0.605 to 0.3302	No	ns	0.7523
TD2/+ vs. TD2/PsiRNAiKK	0.1393	-0.3282 to 0.6069	No	ns	0.7463
CT 9
PsiRNAiKK/+ vs. TD2/+	-0.1036	-0.6264 to 0.4191	No	ns	0.8779
PsiRNAiKK/+ vs. TD2/PsiRNAiKK	0.6782	0.2106 to 1.146	Yes	**	0.0033
TD2/+ vs. TD2/PsiRNAiKK	0.7818	0.3143 to 1.249	Yes	***	0.0007
CT 15
PsiRNAiKK/+ vs. TD2/+	0.2509	-0.2719 to 0.7737	No	ns	0.4738
PsiRNAiKK/+ vs. TD2/PsiRNAiKK	1.138	0.6708 to 1.606	Yes	****	<0.0001
TD2/+ vs. TD2/PsiRNAiKK	0.8875	0.4199 to 1.355	Yes	***	0.0002
CT 21
PsiRNAiKK/+ vs. TD2/+	-0.419	-0.9418 to 0.1037	No	ns	0.1362
PsiRNAiKK/+ vs. TD2/PsiRNAiKK	0.494	0.02642 to 0.9616	Yes	*	0.0366
TD2/+ vs. TD2/PsiRNAiKK	0.913	0.4454 to 1.381	Yes	***	0.0001
Figure 3C
	PsiRNAiKK/+ 18C			TD2/PsiRNAiKK 18C			PsiRNAiKK/+ 29C			TD2/PsiRNAiKK 29C
	Mean	SEM	N (runs)	Mean	SEM	N (runs)	Mean	SEM	N (runs)	Mean	SEM	N (runs)
CT 3	0.21579	0.0226987	3	0.399014	0.0139529	3	0.0239486	0.0088068	3	0.0360403	0.0200653	3
CT 9	1.48283	0.221375	3	2.12131	0.076534	3	0.0994839	0.0657965	3	0.131848	0.0881127	3
CT 15	2.03695	0.154541	3	3.23396	0.105794	3	0.21002	0.133096	3	0.241112	0.144471	3
CT 21	1.14846	0.0779113	3	1.72815	0.215623	3	0.0858324	0.0399389	3	0.10856	0.0608384	3
Two-way ANOVA followed by:
Tukey's multiple comparisons test	Mean Diff.	95.00% CI of diff.	Significant?	Summary	Adjusted P Value
CT 3
PsiRNAiKK/+ 18C vs. TD2/PsiRNAiKK 18C	-0.1832	-0.6113 to 0.2448	No	ns	0.656
PsiRNAiKK/+ 18C vs. PsiRNAiKK/+ 29C	0.1918	-0.2362 to 0.6199	No	ns	0.6225
PsiRNAiKK/+ 18C vs. TD2/PsiRNAiKK 29C	0.1798	-0.2483 to 0.6078	No	ns	0.6693
TD2/PsiRNAiKK 18C vs. PsiRNAiKK/+ 29C	0.3751	-0.05297 to 0.8031	No	ns	0.1028
TD2/PsiRNAiKK 18C vs. TD2/PsiRNAiKK 29C	0.363	-0.06506 to 0.791	No	ns	0.1199
PsiRNAiKK/+ 29C vs. TD2/PsiRNAiKK 29C	-0.01209	-0.4401 to 0.4159	No	ns	0.9998
CT 9
PsiRNAiKK/+ 18C vs. TD2/PsiRNAiKK 18C	-0.6385	-1.067 to -0.2105	Yes	**	0.0017
PsiRNAiKK/+ 18C vs. PsiRNAiKK/+ 29C	1.383	0.9553 to 1.811	Yes	****	<0.0001
PsiRNAiKK/+ 18C vs. TD2/PsiRNAiKK 29C	1.351	0.9229 to 1.779	Yes	****	<0.0001
TD2/PsiRNAiKK 18C vs. PsiRNAiKK/+ 29C	2.022	1.594 to 2.45	Yes	****	<0.0001
TD2/PsiRNAiKK 18C vs. TD2/PsiRNAiKK 29C	1.989	1.561 to 2.417	Yes	****	<0.0001
PsiRNAiKK/+ 29C vs. TD2/PsiRNAiKK 29C	-0.03236	-0.4604 to 0.3957	No	ns	0.9969
CT 15
PsiRNAiKK/+ 18C vs. TD2/PsiRNAiKK 18C	-1.197	-1.625 to -0.769	Yes	****	<0.0001
PsiRNAiKK/+ 18C vs. PsiRNAiKK/+ 29C	1.827	1.399 to 2.255	Yes	****	<0.0001
PsiRNAiKK/+ 18C vs. TD2/PsiRNAiKK 29C	1.796	1.368 to 2.224	Yes	****	<0.0001
TD2/PsiRNAiKK 18C vs. PsiRNAiKK/+ 29C	3.024	2.596 to 3.452	Yes	****	<0.0001
TD2/PsiRNAiKK 18C vs. TD2/PsiRNAiKK 29C	2.993	2.565 to 3.421	Yes	****	<0.0001
PsiRNAiKK/+ 29C vs. TD2/PsiRNAiKK 29C	-0.03109	-0.4591 to 0.3969	No	ns	0.9972
CT 21
PsiRNAiKK/+ 18C vs. TD2/PsiRNAiKK 18C	-0.5797	-1.008 to -0.1517	Yes	**	0.0046
PsiRNAiKK/+ 18C vs. PsiRNAiKK/+ 29C	1.063	0.6346 to 1.491	Yes	****	<0.0001
PsiRNAiKK/+ 18C vs. TD2/PsiRNAiKK 29C	1.04	0.6119 to 1.468	Yes	****	<0.0001
TD2/PsiRNAiKK 18C vs. PsiRNAiKK/+ 29C	1.642	1.214 to 2.07	Yes	****	<0.0001
TD2/PsiRNAiKK 18C vs. TD2/PsiRNAiKK 29C	1.62	1.192 to 2.048	Yes	****	<0.0001
PsiRNAiKK/+ 29C vs. TD2/PsiRNAiKK 29C	-0.02273	-0.4508 to 0.4053	No	ns	0.9989
Figure 3E
	PsiRNAiKK/+ 18C			TD2/PsiRNAiKK 18C			PsiRNAiKK/+ 29C			TD2/PsiRNAiKK 29C
	Mean	SEM	N (runs)	Mean	SEM	N (runs)	Mean	SEM	N (runs)	Mean	SEM	N (runs)
CT 3	0.350369	0.111046	3	0.46744	0.00639591	3	0.034589	0.0110444	3	0.534452	0.489664	3
CT 9	1.70949	0.287074	3	2.12949	0.449434	3	0.363911	0.230752	3	0.270286	0.108006	3
CT 15	2.70255	0.324893	3	2.61119	0.2444	3	0.379962	0.150768	3	0.399006	0.149044	3
CT 21	1.08817	0.214213	3	1.36966	0.336334	3	0.137962	0.0502723	3	0.218487	0.0827357	3
Two-way ANOVA followed by:
Tukey's multiple comparisons test	Mean Diff.	95.00% CI of diff.	Significant?	Summary	Adjusted P Value
CT 3
PsiRNAiKK/+ 18C vs. TD2/PsiRNAiKK 18C	-0.1171	-1.065 to 0.8313	No	ns	0.9869
PsiRNAiKK/+ 18C vs. PsiRNAiKK/+ 29C	0.3158	-0.6326 to 1.264	No	ns	0.8038
PsiRNAiKK/+ 18C vs. TD2/PsiRNAiKK 29C	-0.1841	-1.132 to 0.7643	No	ns	0.9522
TD2/PsiRNAiKK 18C vs. PsiRNAiKK/+ 29C	0.4329	-0.5155 to 1.381	No	ns	0.6088
TD2/PsiRNAiKK 18C vs. TD2/PsiRNAiKK 29C	-0.06701	-1.015 to 0.8814	No	ns	0.9975
PsiRNAiKK/+ 29C vs. TD2/PsiRNAiKK 29C	-0.4999	-1.448 to 0.4485	No	ns	0.4917
CT 9
PsiRNAiKK/+ 18C vs. TD2/PsiRNAiKK 18C	-0.42	-1.368 to 0.5284	No	ns	0.6314
PsiRNAiKK/+ 18C vs. PsiRNAiKK/+ 29C	1.346	0.3972 to 2.294	Yes	**	0.0029
PsiRNAiKK/+ 18C vs. TD2/PsiRNAiKK 29C	1.439	0.4908 to 2.388	Yes	**	0.0014
TD2/PsiRNAiKK 18C vs. PsiRNAiKK/+ 29C	1.766	0.8172 to 2.714	Yes	****	<0.0001
TD2/PsiRNAiKK 18C vs. TD2/PsiRNAiKK 29C	1.859	0.9108 to 2.808	Yes	****	<0.0001
PsiRNAiKK/+ 29C vs. TD2/PsiRNAiKK 29C	0.09363	-0.8547 to 1.042	No	ns	0.9932
CT 15
PsiRNAiKK/+ 18C vs. TD2/PsiRNAiKK 18C	0.09136	-0.857 to 1.04	No	ns	0.9936
PsiRNAiKK/+ 18C vs. PsiRNAiKK/+ 29C	2.323	1.374 to 3.271	Yes	****	<0.0001
PsiRNAiKK/+ 18C vs. TD2/PsiRNAiKK 29C	2.304	1.355 to 3.252	Yes	****	<0.0001
TD2/PsiRNAiKK 18C vs. PsiRNAiKK/+ 29C	2.231	1.283 to 3.18	Yes	****	<0.0001
TD2/PsiRNAiKK 18C vs. TD2/PsiRNAiKK 29C	2.212	1.264 to 3.161	Yes	****	<0.0001
PsiRNAiKK/+ 29C vs. TD2/PsiRNAiKK 29C	-0.01904	-0.9674 to 0.9293	No	ns	>0.9999
CT 21
PsiRNAiKK/+ 18C vs. TD2/PsiRNAiKK 18C	-0.2815	-1.23 to 0.6669	No	ns	0.852
PsiRNAiKK/+ 18C vs. PsiRNAiKK/+ 29C	0.9502	0.001843 to 1.899	Yes	*	0.0494
PsiRNAiKK/+ 18C vs. TD2/PsiRNAiKK 29C	0.8697	-0.07868 to 1.818	No	ns	0.0817
TD2/PsiRNAiKK 18C vs. PsiRNAiKK/+ 29C	1.232	0.2833 to 2.18	Yes	**	0.0069
TD2/PsiRNAiKK 18C vs. TD2/PsiRNAiKK 29C	1.151	0.2028 to 2.1	Yes	*	0.0125
PsiRNAiKK/+ 29C vs. TD2/PsiRNAiKK 29C	-0.08052	-1.029 to 0.8678	No	ns	0.9956
Figure 3G
	PsiRNAiKK/+ 18C			TD2/PsiRNAiKK 18C			PsiRNAiKK/+ 29C			TD2/PsiRNAiKK 29C
	Mean	SEM	N (runs)	Mean	SEM	N (runs)	Mean	SEM	N (runs)	Mean	SEM	N (runs)
CT 3	0.542154	0.312223	3	0.950164	0.439021	3	0.204679	0.0708525	3	1.45679	1.15401	3
CT 9	1.21786	0.495337	3	0.887395	0.341969	3	1.37854	0.302528	3	0.987366	0.110214	3
CT 15	0.772866	0.285846	3	0.801966	0.202013	3	2.38855	0.877526	3	1.61435	0.459605	3
CT 21	0.454863	0.172576	3	0.413034	0.0618697	3	1.05924	0.404403	3	0.888938	0.217856	3
Two-way ANOVA followed by:
Tukey's multiple comparisons test	Mean Diff.	95.00% CI of diff.	Significant?	Summary	Adjusted P Value
CT 3
PsiRNAiKK/+ 18C vs. TD2/PsiRNAiKK 18C	-0.408	-2.185 to 1.369	No	ns	0.9242
PsiRNAiKK/+ 18C vs. PsiRNAiKK/+ 29C	0.3375	-1.44 to 2.114	No	ns	0.955
PsiRNAiKK/+ 18C vs. TD2/PsiRNAiKK 29C	-0.9146	-2.692 to 0.8624	No	ns	0.5119
TD2/PsiRNAiKK 18C vs. PsiRNAiKK/+ 29C	0.7455	-1.032 to 2.522	No	ns	0.67
TD2/PsiRNAiKK 18C vs. TD2/PsiRNAiKK 29C	-0.5066	-2.284 to 1.27	No	ns	0.8663
PsiRNAiKK/+ 29C vs. TD2/PsiRNAiKK 29C	-1.252	-3.029 to 0.5249	No	ns	0.2445
CT 9
PsiRNAiKK/+ 18C vs. TD2/PsiRNAiKK 18C	0.3305	-1.447 to 2.107	No	ns	0.9576
PsiRNAiKK/+ 18C vs. PsiRNAiKK/+ 29C	-0.1607	-1.938 to 1.616	No	ns	0.9947
PsiRNAiKK/+ 18C vs. TD2/PsiRNAiKK 29C	0.2305	-1.547 to 2.007	No	ns	0.9848
TD2/PsiRNAiKK 18C vs. PsiRNAiKK/+ 29C	-0.4911	-2.268 to 1.286	No	ns	0.8765
TD2/PsiRNAiKK 18C vs. TD2/PsiRNAiKK 29C	-0.09997	-1.877 to 1.677	No	ns	0.9987
PsiRNAiKK/+ 29C vs. TD2/PsiRNAiKK 29C	0.3912	-1.386 to 2.168	No	ns	0.9324
CT 15
PsiRNAiKK/+ 18C vs. TD2/PsiRNAiKK 18C	-0.0291	-1.806 to 1.748	No	ns	>0.9999
PsiRNAiKK/+ 18C vs. PsiRNAiKK/+ 29C	-1.616	-3.393 to 0.1613	No	ns	0.0854
PsiRNAiKK/+ 18C vs. TD2/PsiRNAiKK 29C	-0.8415	-2.618 to 0.9355	No	ns	0.5801
TD2/PsiRNAiKK 18C vs. PsiRNAiKK/+ 29C	-1.587	-3.364 to 0.1904	No	ns	0.0937
TD2/PsiRNAiKK 18C vs. TD2/PsiRNAiKK 29C	-0.8124	-2.589 to 0.9646	No	ns	0.6075
PsiRNAiKK/+ 29C vs. TD2/PsiRNAiKK 29C	0.7742	-1.003 to 2.551	No	ns	0.6433
CT 21
PsiRNAiKK/+ 18C vs. TD2/PsiRNAiKK 18C	0.04183	-1.735 to 1.819	No	ns	>0.9999
PsiRNAiKK/+ 18C vs. PsiRNAiKK/+ 29C	-0.6044	-2.381 to 1.173	No	ns	0.7936
PsiRNAiKK/+ 18C vs. TD2/PsiRNAiKK 29C	-0.4341	-2.211 to 1.343	No	ns	0.9106
TD2/PsiRNAiKK 18C vs. PsiRNAiKK/+ 29C	-0.6462	-2.423 to 1.131	No	ns	0.7588
TD2/PsiRNAiKK 18C vs. TD2/PsiRNAiKK 29C	-0.4759	-2.253 to 1.301	No	ns	0.8861
PsiRNAiKK/+ 29C vs. TD2/PsiRNAiKK 29C	0.1703	-1.607 to 1.947	No	ns	0.9937
