# Supplementary material for: Drosophila PSI controls circadian period and the phase of circadian behavior under temperature cycle via tim splicing
Source: eLife journal article supplement (doi:10.7554/elife.50063), 2019-11-08
Supplement: supp [file elife-50063-supp-v1.zip › elife_poa_e50063_Figure_4_figure_supplement_1_source_data_1.xlsx]

## Sheet: Figure 4-S1
Each row represents an individual fly
Genotype	Rhythmic (R)/Arrhythmic (A)	Period	Power	Width
(20°C)
TD2/+	R	24.9	37.4	4
TD2/+	A	24	-1	0
TD2/+	A	41.5	5.4	1
TD2/+	R	24.2	50.4	3.5
TD2/+	R	25.8	65.5	5
TD2/+	R	25	21.6	4
TD2/+	R	25.6	60.9	4.5
TD2/+	R	24.6	65	4.5
TD2/+	A	24.5	-9.7	0
TD2/+	R	24.7	45.9	3.5
TD2/+	R	25.4	45.2	5
TD2/+	R	25.3	62.8	5
TD2/+	R	25.4	47.2	5
TD2/+	R	24.4	29.4	2
TD2/+	R	25	36.9	3
TD2/+	R	24.5	59	3
TD2/+	R	24.9	43	4
TD2/+	R	23.8	55.3	4
TD2/+	A	25.5	5.9	1
TD2/+	A	26	-4.4	0
TD2/+	A	24	15	1
TD2/+	A	19	-8.4	0
TD2/+	R	24.7	29.1	3.5
TD2/+	R	24.8	23.8	3.5
TD2/+	R	24.2	23.3	2.5
TD2/+	A	24.2	6.4	0.5
TD2/+	A	24.7	19.2	2.5
TD2/+	A	22.7	18.4	0.5
TD2/+	A	24.2	11.1	0.5
TD2/+	A	24.2	19.8	2.5
TD2/+	R	24.7	48.2	4.5
TD2/+	A	23.7	20.4	0.5
TD2/+	A	19	-6	0
TD2/+	A	24.2	13.5	1.5
TD2/+	A	26.5	-10.2	0
TD2/+	R	25.6	29.5	4.5
TD2/+	R	25	35.3	4
TD2/+	R	25.2	24.2	2.5
TD2/+	R	25	26.8	4
PsiRNAiGD/+	R	24	52.4	4
PsiRNAiGD/+	R	24.2	77.8	4.5
PsiRNAiGD/+	R	23.7	44.4	3.5
PsiRNAiGD/+	R	24.1	94.7	4.5
PsiRNAiGD/+	R	24.4	63.8	4
PsiRNAiGD/+	R	23.7	42.5	3.5
PsiRNAiGD/+	R	24.3	50	4
PsiRNAiGD/+	R	24.6	71.2	4.5
PsiRNAiGD/+	R	23.4	40.7	3
PsiRNAiGD/+	R	24.2	40.3	3.5
PsiRNAiGD/+	R	23.9	36.5	3
PsiRNAiGD/+	R	24.5	35.3	4
PsiRNAiGD/+	R	24.5	32.7	3
PsiRNAiGD/+	A	23	-9.8	0
PsiRNAiGD/+	R	23.9	39.6	4
PsiRNAiGD/+	R	23.5	57.5	4
PsiRNAiGD/+	R	24.5	29.8	5
PsiRNAiGD/+	A	24.2	12.9	2.5
PsiRNAiGD/+	A	23.9	26.1	1
PsiRNAiGD/+	A	21.5	-1.4	0
PsiRNAiGD/+	R	23.7	37.5	3.5
PsiRNAiGD/+	A	23.7	9.7	0.5
PsiRNAiGD/+	R	23.7	55.2	3.5
PsiRNAiGD/+	A	23.2	4.8	0.5
PsiRNAiGD/+	A	24	14.4	1
PsiRNAiGD/+	R	24	31.4	4
PsiRNAiGD/+	A	24	19.7	4
PsiRNAiGD/+	R	23.9	23.1	3
PsiRNAiGD/+	A	22.7	15.5	1.5
PsiRNAiGD/+	R	23.2	35.1	2.5
PsiRNAiGD/+	R	23.2	20.9	1.5
PsiRNAiGD/+	R	23.9	46	4
TD2/PsiRNAiGD	R	23.7	80.1	4.5
TD2/PsiRNAiGD	A	24.5	13.1	1
TD2/PsiRNAiGD	R	23.6	65.1	3.5
TD2/PsiRNAiGD	R	23.4	69.5	3
TD2/PsiRNAiGD	R	23.4	25.7	3
TD2/PsiRNAiGD	R	24.3	74.3	5
TD2/PsiRNAiGD	R	24.2	46.8	4.5
TD2/PsiRNAiGD	R	23.6	96.1	4.5
TD2/PsiRNAiGD	R	24.1	91.8	5.5
TD2/PsiRNAiGD	R	23.9	82.8	4
TD2/PsiRNAiGD	A	12.2	4.4	0.5
TD2/PsiRNAiGD	R	23.5	47.5	4
TD2/PsiRNAiGD	R	24.1	71.7	4.5
TD2/PsiRNAiGD	R	24.1	83	4.5
TD2/PsiRNAiGD	R	24.4	68.1	5
TD2/PsiRNAiGD	A	24	13.2	2
TD2/PsiRNAiGD	R	23.5	22.3	3
TD2/PsiRNAiGD	A	23.7	11.6	0.5
TD2/PsiRNAiGD	A	24.9	9.3	1
TD2/PsiRNAiGD	R	23.4	34	2
TD2/PsiRNAiGD	A	23.7	16.8	0.5
TD2/PsiRNAiGD	A	23	-0.2	0
TD2/PsiRNAiGD	A	23.2	18.5	1.5
TD2/PsiRNAiGD	R	23.2	24.8	1.5
TD2/PsiRNAiGD	A	25.7	1.6	0.5
TD2/PsiRNAiGD	A	44.5	-7.2	0
TD2/PsiRNAiGD	A	22.5	-5.8	0
TD2/PsiRNAiGD	R	23.9	43.8	3
TD2/PsiRNAiGD	A	23.2	18.5	1.5
TD2/PsiRNAiGD	R	23	28.9	2
TD2/PsiRNAiGD	A	12	-7.1	0
TD2/PsiRNAiGD	R	23.2	26.4	1.5
TD2/PsiRNAiGD	R	24	21.1	3
TD2/PsiRNAiGD	R	23.4	35.4	4
TD2/PsiRNAiGD	R	23.7	28.6	2.5
TD2/PsiRNAiGD	R	23.3	43	3.5
TD2/PsiRNAiGD	R	23.5	39.4	5
TD2/PsiRNAiGD	A	23.5	-0.9	0
TD2/PsiRNAiGD	R	23.9	82.9	4
TD2/PsiRNAiGD	R	23.4	88.9	4
TD2/PsiRNAiGD	A	23.2	15.8	1.5
TD2/PsiRNAiGD	R	23.2	26.5	2.5
TD2/PsiRNAiGD	R	23.2	26.2	1.5
TD2/PsiRNAiGD	R	23.5	37.7	4
PsiRNAiKK/+	R	23.7	45.1	3.5
PsiRNAiKK/+	A	24.2	8	1.5
PsiRNAiKK/+	A	23.5	7.5	1
PsiRNAiKK/+	A	23.4	23.7	1
PsiRNAiKK/+	R	23.7	22.4	2.5
PsiRNAiKK/+	R	24.2	20.2	2.5
PsiRNAiKK/+	R	24.1	66.6	3.5
PsiRNAiKK/+	A	22.7	12	0.5
PsiRNAiKK/+	A	24	6.3	1
PsiRNAiKK/+	R	24	24.9	2
PsiRNAiKK/+	A	23.7	13.7	2.5
PsiRNAiKK/+	A	24.2	1.4	0.5
PsiRNAiKK/+	A	23.4	6.9	1
PsiRNAiKK/+	R	23.9	48.1	3
PsiRNAiKK/+	A	25.2	19.4	0.5
PsiRNAiKK/+	A	23.5	23.4	1
PsiRNAiKK/+	A	24.2	0.5	0.5
PsiRNAiKK/+	A	23	-4.4	0
PsiRNAiKK/+	A	24.2	6.5	0.5
PsiRNAiKK/+	R	23.7	60.5	2.5
PsiRNAiKK/+	A	11	-6.6	0
PsiRNAiKK/+	A	23.5	20.6	1
PsiRNAiKK/+	A	25	16.5	1
PsiRNAiKK/+	A	23.2	6.6	0.5
PsiRNAiKK/+	R	24.2	25.4	2.5
PsiRNAiKK/+	A	24.2	13.1	0.5
PsiRNAiKK/+	R	23.7	23.5	1.5
PsiRNAiKK/+	A	23.5	-4.1	0
PsiRNAiKK/+	R	24	62.3	4
PsiRNAiKK/+	R	23.3	35.1	3.5
PsiRNAiKK/+	R	23.4	35.5	2
PsiRNAiKK/+	A	22.9	29.8	1
TD2/PsiRNAiKK	R	23.9	71.6	5
TD2/PsiRNAiKK	R	23.5	20.7	3
TD2/PsiRNAiKK	R	23.7	36.6	4.5
TD2/PsiRNAiKK	R	23.9	46.7	4
TD2/PsiRNAiKK	R	24.4	24.7	4
TD2/PsiRNAiKK	R	24.1	105.2	4.5
TD2/PsiRNAiKK	A	23	11.4	1
TD2/PsiRNAiKK	A	23.5	14	1
TD2/PsiRNAiKK	R	23.7	59.5	4.5
TD2/PsiRNAiKK	A	24.2	18	3.5
TD2/PsiRNAiKK	R	23.4	45.9	3
TD2/PsiRNAiKK	R	23.5	62.3	4
TD2/PsiRNAiKK	A	25	12.6	1
TD2/PsiRNAiKK	R	23.7	41.9	4.5
TD2/PsiRNAiKK	R	23.5	40.6	3
TD2/PsiRNAiKK	A	23.7	16.6	1.5
TD2/PsiRNAiKK	A	24.2	3.9	0.5
TD2/PsiRNAiKK	R	23.7	24.1	1.5
TD2/PsiRNAiKK	A	21.7	12.8	0.5
TD2/PsiRNAiKK	A	23.7	13.7	1.5
TD2/PsiRNAiKK	A	23.5	11.7	1
TD2/PsiRNAiKK	A	22.5	-6.7	0
TD2/PsiRNAiKK	R	23.2	23.5	2.5
TD2/PsiRNAiKK	A	22.7	16.3	2.5
TD2/PsiRNAiKK	A	23.5	15.7	1
TD2/PsiRNAiKK	A	15.5	-10	0
TD2/PsiRNAiKK	A	23.2	5	0.5
TD2/PsiRNAiKK	A	22.7	22.3	0.5
TD2/PsiRNAiKK	A	24.2	3.8	0.5
TD2/PsiRNAiKK	A	23.7	12.8	0.5
TD2/PsiRNAiKK	A	23.5	26	1
TD2/PsiRNAiKK	A	23.7	11.4	0.5
TD2/PsiRNAiKK	A	23.7	7.4	0.5
TD2/PsiRNAiKK	R	23.5	27.4	4
TD2/PsiRNAiKK	R	23.7	38.5	1.5
TD2/PsiRNAiKK	A	22.9	26.8	1
TD2/PsiRNAiKK	A	23.2	19	2.5
TD2/PsiRNAiKK	A	23.2	18.2	2.5
TD2/PsiRNAiKK	A	26	-4.1	0
TD2/PsiRNAiKK	A	23.9	16.2	2
TD2/PsiRNAiKK	A	23.7	14.9	0.5
TD2/PsiRNAiKK	A	23.2	5.9	0.5
TD2/PsiRNAiKK	A	23.2	8.9	1.5
TD2/PsiRNAiKK	R	24.2	31.8	2.5
(25°C)
TD2/+	A	11	-4.8	0
TD2/+	R	25.1	40.7	4.5
TD2/+	R	25.1	45.4	4.5
TD2/+	R	24.7	31.1	2.5
TD2/+	R	24.7	20.3	2.5
TD2/+	R	24.9	33.5	3
TD2/+	A	23.5	-5.7	0
TD2/+	R	24.9	30.5	3
TD2/+	R	24.9	54.9	5
TD2/+	R	24.9	42.2	5
TD2/+	R	24.9	82.2	4
TD2/+	R	24.4	32.9	3
TD2/+	R	24.8	82.7	5
TD2/+	A	23.7	2.3	0.5
TD2/+	A	24.5	17.9	3
TD2/+	R	24.9	31.5	4
TD2/+	R	24.9	72	5
TD2/+	R	24.7	55.5	4.5
TD2/+	R	24.9	51.7	5
TD2/+	R	24	51.3	4
TD2/+	A	24.5	5.5	1
TD2/+	A	26.5	17	1
TD2/+	R	24.2	33.2	2.5
TD2/+	R	24.9	75.4	5
TD2/+	R	25	32.2	4
TD2/+	R	24.9	33.1	3
TD2/+	R	24.6	54.2	4.5
TD2/+	A	26.2	4.4	0.5
TD2/+	R	24.6	69.3	4.5
TD2/+	R	24.9	26.1	3
TD2/+	R	24.7	42	3.5
TD2/+	R	24.7	41.2	3.5
TD2/+	R	24.8	81.7	5
TD2/+	R	24.9	43.4	4
TD2/+	R	24.6	66.5	3.5
TD2/+	R	24.9	38.1	4
TD2/+	R	25.2	51.5	4.5
TD2/+	R	24.9	25.7	3
TD2/+	R	24.9	80.2	5
TD2/+	A	23.7	15.8	2.5
TD2/+	R	24.9	34.2	3
TD2/+	R	24.9	51.3	4
TD2/+	R	24.7	30.9	2.5
TD2/+	R	24.5	52.9	3
TD2/+	R	25.1	66.7	4.5
TD2/+	R	24.6	59.5	4.5
TD2/+	R	24.9	52.6	4
TD2/+	R	25.2	40.5	4.5
TD2/+	R	24.6	59.1	3.5
TD2/+	R	24.5	56.6	4
TD2/+	R	24.2	68.1	3.5
TD2/+	R	25.4	49.9	4
TD2/+	R	24.6	51.8	3.5
TD2/+	R	25	27.5	3
TD2/+	R	25.2	41.2	4.5
TD2/+	A	26	-8.4	0
TD2/+	R	24.7	59.3	4.5
TD2/+	R	24.5	21.3	2
TD2/+	R	25.2	43.9	3.5
TD2/+	A	24.2	9.2	1.5
TD2/+	R	24.7	22.7	3.5
TD2/+	R	24.5	57.3	4
TD2/+	A	25.5	20.3	1
TD2/+	R	24.5	63.4	4
TD2/+	A	24.7	10.7	2.5
TD2/+	R	24.7	79.6	5.5
TD2/+	R	24.6	32.2	3.5
TD2/+	A	24	-0.3	0
TD2/+	R	25.4	28.6	4
TD2/+	R	24.9	60.2	4
TD2/+	R	25	33.7	4
PsiRNAiGD/+	R	23.9	54.9	4
PsiRNAiGD/+	R	24.6	64.3	4.5
PsiRNAiGD/+	R	24	34.7	4
PsiRNAiGD/+	R	24.2	51.1	4.5
PsiRNAiGD/+	R	24.1	91.4	4.5
PsiRNAiGD/+	R	24.2	67.5	3.5
PsiRNAiGD/+	R	23.9	102	4
PsiRNAiGD/+	R	24.4	59.1	4
PsiRNAiGD/+	R	24.6	86.8	4.5
PsiRNAiGD/+	R	23.7	70.8	3.5
PsiRNAiGD/+	R	24	42.4	3
PsiRNAiGD/+	R	23.7	31.5	2.5
PsiRNAiGD/+	R	24.2	66.2	3.5
PsiRNAiGD/+	R	24.1	52.3	3.5
PsiRNAiGD/+	R	24.1	98.5	4.5
PsiRNAiGD/+	R	24.4	48.4	4
PsiRNAiGD/+	R	24.4	31.9	2
PsiRNAiGD/+	R	24.2	45	3.5
PsiRNAiGD/+	R	24	38.8	3
PsiRNAiGD/+	R	24.2	64.1	3.5
PsiRNAiGD/+	R	24.2	20.1	1.5
PsiRNAiGD/+	R	24.2	66	3.5
PsiRNAiGD/+	R	24.6	64.7	4.5
PsiRNAiGD/+	A	24.5	18	3
PsiRNAiGD/+	R	24.4	35.6	3
PsiRNAiGD/+	R	24.4	57.7	3
PsiRNAiGD/+	R	24.4	57.4	4
PsiRNAiGD/+	R	24.7	34.2	3.5
PsiRNAiGD/+	R	24.4	58.2	4
PsiRNAiGD/+	R	24.4	54.4	4
PsiRNAiGD/+	A	24.2	16.4	2.5
PsiRNAiGD/+	A	24.5	19.2	2
PsiRNAiGD/+	R	24	25	2
PsiRNAiGD/+	A	23.9	17.8	2
PsiRNAiGD/+	R	24.5	94.6	4.5
PsiRNAiGD/+	R	24.6	80.6	4.5
PsiRNAiGD/+	R	24.3	105.5	5
PsiRNAiGD/+	R	24	50.3	3
PsiRNAiGD/+	R	24.4	92.1	5
PsiRNAiGD/+	R	24.2	43.2	3.5
PsiRNAiGD/+	R	24.4	59.6	4
PsiRNAiGD/+	R	23.7	27.9	1.5
PsiRNAiGD/+	R	24.1	56.6	3.5
PsiRNAiGD/+	R	24	33.1	3
PsiRNAiGD/+	R	24.5	37.4	3
PsiRNAiGD/+	R	23.9	84.7	4
PsiRNAiGD/+	R	23.7	61.5	4.5
PsiRNAiGD/+	R	24.4	39	3
PsiRNAiGD/+	R	24.2	72.8	3.5
PsiRNAiGD/+	R	24.7	24.3	1.5
PsiRNAiGD/+	R	24.1	96.2	3.5
PsiRNAiGD/+	R	24.2	73.2	3.5
PsiRNAiGD/+	R	23.5	30.4	3
PsiRNAiGD/+	R	24.4	62.6	4
PsiRNAiGD/+	R	23.7	25.7	2.5
PsiRNAiGD/+	R	24.3	61.2	3
PsiRNAiGD/+	R	23.9	63	4
PsiRNAiGD/+	R	24.7	49.5	4.5
PsiRNAiGD/+	R	24.1	59.9	3.5
PsiRNAiGD/+	R	24.3	87.7	4
PsiRNAiGD/+	R	24.5	63.4	5
PsiRNAiGD/+	R	23.9	61.2	4
PsiRNAiGD/+	R	24.3	101.8	5
TD2/PsiRNAiGD	A	22.8	13.6	2.5
TD2/PsiRNAiGD	A	24.7	4.5	0.5
TD2/PsiRNAiGD	R	23.4	55.6	3
TD2/PsiRNAiGD	R	23.2	22.5	1.5
TD2/PsiRNAiGD	R	24.2	79.9	4.5
TD2/PsiRNAiGD	A	23.5	15.8	3
TD2/PsiRNAiGD	R	22.9	36.2	2
TD2/PsiRNAiGD	R	24.4	69.9	5
TD2/PsiRNAiGD	A	23.5	17.5	2
TD2/PsiRNAiGD	A	24	18.6	3
TD2/PsiRNAiGD	R	23.5	30.1	3
TD2/PsiRNAiGD	A	23.5	10.6	2
TD2/PsiRNAiGD	R	23.2	36.6	2.5
TD2/PsiRNAiGD	R	24	29.8	4
TD2/PsiRNAiGD	A	24.7	15.9	3.5
TD2/PsiRNAiGD	R	22.9	21.8	2
TD2/PsiRNAiGD	R	24.2	56.7	4.5
TD2/PsiRNAiGD	R	23.4	30.2	2
TD2/PsiRNAiGD	R	23.5	83.2	5
TD2/PsiRNAiGD	R	24.4	40.3	4
TD2/PsiRNAiGD	R	24.3	86.9	5
TD2/PsiRNAiGD	R	23.6	68	3.5
TD2/PsiRNAiGD	R	24.4	62.2	4
TD2/PsiRNAiGD	R	24.3	87.1	6
TD2/PsiRNAiGD	R	23.5	32.5	4
TD2/PsiRNAiGD	R	23.5	33.5	3
TD2/PsiRNAiGD	R	23.9	35.4	2
TD2/PsiRNAiGD	R	23.9	46.9	4
TD2/PsiRNAiGD	R	24.1	65.3	4.5
TD2/PsiRNAiGD	R	23.9	58.7	4
TD2/PsiRNAiGD	R	23.2	22.1	1.5
TD2/PsiRNAiGD	R	24.4	62.5	5
TD2/PsiRNAiGD	R	23.4	49.6	3
TD2/PsiRNAiGD	R	23.5	29.8	3
TD2/PsiRNAiGD	A	23.2	14.3	2.5
TD2/PsiRNAiGD	R	23.6	52.4	3.5
TD2/PsiRNAiGD	R	23.4	34.6	2
TD2/PsiRNAiGD	R	23.2	70.7	3.5
TD2/PsiRNAiGD	R	23.6	60.4	3.5
TD2/PsiRNAiGD	A	23	15.3	2
TD2/PsiRNAiGD	R	23.7	47.7	3.5
TD2/PsiRNAiGD	R	23.7	45.9	2.5
TD2/PsiRNAiGD	R	23.5	33.9	3
TD2/PsiRNAiGD	R	23.6	63.8	4.5
TD2/PsiRNAiGD	R	24	39.3	4
TD2/PsiRNAiGD	A	23.2	14.2	0.5
TD2/PsiRNAiGD	R	23.9	58.8	5
TD2/PsiRNAiGD	R	23.9	45.1	4
PsiRNAiKK/+	R	23.7	27.3	2.5
PsiRNAiKK/+	R	24.1	73.6	3.5
PsiRNAiKK/+	R	23.6	40.8	2.5
PsiRNAiKK/+	R	23.4	24.4	2
PsiRNAiKK/+	R	23.7	60.1	3.5
PsiRNAiKK/+	R	23.9	52.3	3
PsiRNAiKK/+	R	24.1	82.2	3.5
PsiRNAiKK/+	R	23.9	55.4	3
PsiRNAiKK/+	R	23.7	53.1	2.5
PsiRNAiKK/+	R	23.9	73.7	4
PsiRNAiKK/+	R	24.3	102.2	5
PsiRNAiKK/+	R	24	64.3	3
PsiRNAiKK/+	R	23.7	29.2	2.5
PsiRNAiKK/+	R	24.7	43.5	4.5
PsiRNAiKK/+	R	24.2	28.1	3.5
PsiRNAiKK/+	A	23.7	3.2	0.5
PsiRNAiKK/+	R	24.4	85.7	4
PsiRNAiKK/+	R	23.7	37.7	2.5
PsiRNAiKK/+	R	24	31.5	3
PsiRNAiKK/+	R	24.1	82.6	3.5
PsiRNAiKK/+	R	24.1	104.6	4.5
PsiRNAiKK/+	R	24	28.9	4
PsiRNAiKK/+	R	24	22.3	3
PsiRNAiKK/+	R	24.2	84.6	4.5
PsiRNAiKK/+	R	24.2	89.4	4.5
PsiRNAiKK/+	R	24.4	28.1	2
PsiRNAiKK/+	R	23.8	53.9	3.5
PsiRNAiKK/+	R	23.9	89.1	4
PsiRNAiKK/+	R	24.2	68.2	3.5
PsiRNAiKK/+	R	23.9	75.5	4
PsiRNAiKK/+	R	24.1	96.5	3.5
PsiRNAiKK/+	R	24.9	29.4	3
PsiRNAiKK/+	R	24.4	79.1	4
PsiRNAiKK/+	R	24.1	112.7	4.5
PsiRNAiKK/+	R	23.9	56.5	2
PsiRNAiKK/+	R	23.9	64.6	3
PsiRNAiKK/+	A	24.7	15	2.5
PsiRNAiKK/+	R	23.9	85.5	4
PsiRNAiKK/+	R	23.9	105.4	4
PsiRNAiKK/+	R	24.1	93.3	3.5
PsiRNAiKK/+	R	23.9	57.4	3
PsiRNAiKK/+	R	23.8	100.6	3
PsiRNAiKK/+	R	24.1	92	3.5
PsiRNAiKK/+	R	24	112.7	4
PsiRNAiKK/+	R	23.9	66.7	3
PsiRNAiKK/+	R	23.9	87.3	3
PsiRNAiKK/+	R	24.4	58.4	4
PsiRNAiKK/+	R	24.3	98	4
PsiRNAiKK/+	R	23.9	76.2	4
PsiRNAiKK/+	R	24.4	76	5
PsiRNAiKK/+	R	24.2	80.7	4.5
PsiRNAiKK/+	R	24.1	63.1	3.5
PsiRNAiKK/+	R	24	103.1	4.5
PsiRNAiKK/+	R	23.4	37.2	2
PsiRNAiKK/+	R	24	30.8	3
TD2/PsiRNAiKK	R	23.2	63.4	3.5
TD2/PsiRNAiKK	R	24.1	60.7	4.5
TD2/PsiRNAiKK	A	23.7	14	0.5
TD2/PsiRNAiKK	A	25.5	-3.2	0
TD2/PsiRNAiKK	A	22.7	17.3	0.5
TD2/PsiRNAiKK	A	23.2	13	1.5
TD2/PsiRNAiKK	A	22.7	6.1	0.5
TD2/PsiRNAiKK	A	23.2	6.6	0.5
TD2/PsiRNAiKK	R	24.1	38.2	3.5
TD2/PsiRNAiKK	R	23.7	47.6	3.5
TD2/PsiRNAiKK	R	24.1	83.3	4.5
TD2/PsiRNAiKK	R	24.1	86.1	4.5
TD2/PsiRNAiKK	R	23.9	64.4	4
TD2/PsiRNAiKK	R	23.5	64.2	4
TD2/PsiRNAiKK	R	23.6	83.5	4.5
TD2/PsiRNAiKK	R	23.2	50.7	4.5
TD2/PsiRNAiKK	A	19.5	-3.4	0
TD2/PsiRNAiKK	R	23.2	40.1	1.5
TD2/PsiRNAiKK	R	22.8	28.1	1.5
TD2/PsiRNAiKK	R	23.4	81	4
TD2/PsiRNAiKK	R	23.6	76.7	4.5
TD2/PsiRNAiKK	R	23.7	36.6	3.5
TD2/PsiRNAiKK	R	23.8	39.2	3.5
TD2/PsiRNAiKK	R	23.3	60	4.5
TD2/PsiRNAiKK	R	23.9	38.7	3
TD2/PsiRNAiKK	R	23.7	29	2.5
TD2/PsiRNAiKK	R	23.7	71.3	3.5
TD2/PsiRNAiKK	A	23.9	31.7	1
TD2/PsiRNAiKK	R	24	95.4	3.5
TD2/PsiRNAiKK	R	23.7	77.6	3.5
TD2/PsiRNAiKK	R	23.7	72.5	3.5
TD2/PsiRNAiKK	R	23.4	75.6	3
TD2/PsiRNAiKK	R	23.7	80	3.5
TD2/PsiRNAiKK	R	23.6	66.2	3.5
TD2/PsiRNAiKK	R	23.8	62	3
(30°C)
TD2/+	A	23.9	16.7	2
TD2/+	A	23.7	21	0.5
TD2/+	R	22.8	26.2	3.5
TD2/+	R	23.7	38.8	2.5
TD2/+	R	23.1	24.1	5
TD2/+	R	23.4	53.3	3
TD2/+	A	25	-5.5	0
TD2/+	R	23.7	25.8	2.5
TD2/+	R	23.9	65	3
TD2/+	R	23.3	37.2	4.5
TD2/+	R	23.7	41.9	3.5
TD2/+	R	23.9	63.6	3
TD2/+	R	24.2	43	2.5
TD2/+	R	23.2	56.5	4.5
TD2/+	R	23.9	66.1	3
TD2/+	A	23.5	12.4	2
TD2/+	R	24.2	26.3	1.5
TD2/+	A	23.8	19.5	2.5
TD2/+	R	23.7	61.2	4.5
TD2/+	R	23.7	37.4	2.5
TD2/+	R	23.5	59.3	5
TD2/+	R	23.3	38.5	3.5
TD2/+	R	23.8	29.9	2.5
TD2/+	R	23.5	41.6	4
TD2/+	R	23	29.5	4
TD2/+	R	24	44.9	3
TD2/+	R	23.8	74.9	3.5
TD2/+	R	23.2	75.7	4.5
TD2/+	R	23.5	51.5	4
TD2/+	R	23.2	72.6	4.5
TD2/+	R	23.5	42.5	4
TD2/+	R	23.7	43.2	3.5
TD2/+	R	23.5	56.4	3
TD2/+	R	24.2	30.3	2.5
TD2/+	R	24	62.9	3
TD2/+	R	24.2	45	2.5
TD2/+	R	23.7	93.2	4.5
TD2/+	R	24.4	41.3	3
TD2/+	R	23.8	38.6	2.5
PsiRNAiGD/+	A	23.4	32.5	1
PsiRNAiGD/+	R	23.7	46.2	2.5
PsiRNAiGD/+	A	23.7	4.7	0.5
PsiRNAiGD/+	R	23.7	31.6	2.5
PsiRNAiGD/+	R	23.7	34.4	1.5
PsiRNAiGD/+	A	12.2	11.3	0.5
PsiRNAiGD/+	R	23.7	77.3	2.5
PsiRNAiGD/+	R	23.6	49.8	2.5
PsiRNAiGD/+	R	23.9	26.2	2
PsiRNAiGD/+	R	23.4	20.5	2
PsiRNAiGD/+	A	11.5	-0.1	0
PsiRNAiGD/+	R	23.5	26.5	2
PsiRNAiGD/+	A	23.2	3.8	0.5
PsiRNAiGD/+	R	23.5	38.4	2
PsiRNAiGD/+	A	23.4	16.2	2
PsiRNAiGD/+	R	23.2	69.1	2.5
PsiRNAiGD/+	R	23.4	37.1	2
PsiRNAiGD/+	R	23.6	54.5	2.5
PsiRNAiGD/+	R	23.7	38.7	1.5
PsiRNAiGD/+	R	23.7	36.1	1.5
PsiRNAiGD/+	R	23.7	41.2	2.5
PsiRNAiGD/+	R	23.7	34.7	1.5
PsiRNAiGD/+	R	23.2	30.6	1.5
PsiRNAiGD/+	R	23.6	42.2	2.5
PsiRNAiGD/+	R	23.7	29.3	1.5
PsiRNAiGD/+	R	24	32.3	2
PsiRNAiGD/+	A	12	-3	0
PsiRNAiGD/+	R	23.7	34.6	1.5
PsiRNAiGD/+	A	11.9	20.5	1
PsiRNAiGD/+	R	23.8	74.3	2
PsiRNAiGD/+	R	23.4	74.7	2
PsiRNAiGD/+	R	23.7	56.9	1.5
TD2/PsiRNAiGD	R	22.8	42.4	2.5
TD2/PsiRNAiGD	A	11.7	9.1	0.5
TD2/PsiRNAiGD	R	21.9	46.2	4
TD2/PsiRNAiGD	R	23.2	20.9	1.5
TD2/PsiRNAiGD	R	22.5	28.2	3
TD2/PsiRNAiGD	A	23.7	2.1	0.5
TD2/PsiRNAiGD	R	22.2	44.8	3.5
TD2/PsiRNAiGD	A	21	-9.9	0
TD2/PsiRNAiGD	A	22.5	4.3	1
TD2/PsiRNAiGD	A	11.5	-6.4	0
TD2/PsiRNAiGD	A	22.7	16.3	1.5
TD2/PsiRNAiGD	A	21.5	-15.1	0
TD2/PsiRNAiGD	A	11.7	20	0.5
TD2/PsiRNAiGD	R	22.7	39.4	2.5
TD2/PsiRNAiGD	A	22.7	17.2	1.5
TD2/PsiRNAiGD	R	23.2	43.1	1.5
TD2/PsiRNAiGD	A	22.2	18.1	3.5
TD2/PsiRNAiGD	A	22	-11.2	0
TD2/PsiRNAiGD	A	21	-2.2	0
TD2/PsiRNAiGD	A	23.2	10.3	1.5
TD2/PsiRNAiGD	A	23.2	17.1	1.5
TD2/PsiRNAiGD	R	22.8	21.5	2.5
TD2/PsiRNAiGD	A	22.7	11.2	1.5
TD2/PsiRNAiGD	A	22.5	7.1	1
TD2/PsiRNAiGD	A	11.7	20.5	0.5
TD2/PsiRNAiGD	A	20.5	-1.2	0
TD2/PsiRNAiGD	A	11.9	7.4	1
TD2/PsiRNAiGD	A	21	-6.5	0
TD2/PsiRNAiGD	A	12	-20.5	0
TD2/PsiRNAiGD	A	12	-7.3	0
TD2/PsiRNAiGD	A	23.2	13.2	1.5
TD2/PsiRNAiGD	R	23	40.5	2
TD2/PsiRNAiGD	R	23.7	27.8	2.5
TD2/PsiRNAiGD	A	22.2	2.5	0.5
TD2/PsiRNAiGD	A	23.5	12.4	1
TD2/PsiRNAiGD	R	22.9	58.4	3
TD2/PsiRNAiGD	R	23.4	78.4	4
TD2/PsiRNAiGD	R	23.2	50.1	2.5
TD2/PsiRNAiGD	R	23.7	25.6	2.5
TD2/PsiRNAiGD	R	23.7	20.8	1.5
TD2/PsiRNAiGD	R	23.5	21.8	3
TD2/PsiRNAiGD	R	23.6	41.7	3.5
PsiRNAiKK/+	R	23.4	68.6	2
PsiRNAiKK/+	R	23.7	43.8	1.5
PsiRNAiKK/+	R	23.4	40.4	2
PsiRNAiKK/+	R	23.7	41.9	2.5
PsiRNAiKK/+	R	23.7	50.5	2.5
PsiRNAiKK/+	R	23.3	62.7	2
PsiRNAiKK/+	R	23.6	74.3	2.5
PsiRNAiKK/+	R	23.4	97.8	3
PsiRNAiKK/+	R	23.6	70.3	2.5
PsiRNAiKK/+	R	23.4	77.2	3
PsiRNAiKK/+	R	23.2	90.6	2.5
PsiRNAiKK/+	R	23.4	31.6	2
PsiRNAiKK/+	A	23.2	20.4	0.5
PsiRNAiKK/+	R	23.6	96.6	2.5
PsiRNAiKK/+	R	23.4	36.3	2
PsiRNAiKK/+	R	23.4	65.7	2
PsiRNAiKK/+	R	24	60.2	1.5
PsiRNAiKK/+	A	11.8	71.3	1
PsiRNAiKK/+	R	23.4	78.8	2
PsiRNAiKK/+	R	23.5	51.7	2
PsiRNAiKK/+	R	23.4	51.9	2
PsiRNAiKK/+	A	23.5	50.8	1
PsiRNAiKK/+	R	23.6	34.7	1.5
PsiRNAiKK/+	R	23.7	43.1	2.5
PsiRNAiKK/+	R	23.6	67.1	2.5
PsiRNAiKK/+	R	23.5	47.2	2
PsiRNAiKK/+	R	23.6	57.9	2.5
PsiRNAiKK/+	R	23.5	68.6	3
PsiRNAiKK/+	R	23.4	88.2	2
PsiRNAiKK/+	R	23.7	84.2	2.5
PsiRNAiKK/+	R	23.6	80.9	1.5
TD2/PsiRNAiKK	R	21.2	23.1	2.5
TD2/PsiRNAiKK	A	21.5	12.1	3
TD2/PsiRNAiKK	A	11.5	-3.4	0
TD2/PsiRNAiKK	A	11.5	-1.4	0
TD2/PsiRNAiKK	R	22.9	71.3	3
TD2/PsiRNAiKK	A	22.4	21.8	1
TD2/PsiRNAiKK	A	22.7	5.2	0.5
TD2/PsiRNAiKK	A	24.2	5.2	0.5
TD2/PsiRNAiKK	A	22	16.2	4
TD2/PsiRNAiKK	R	23.2	22.4	1.5
TD2/PsiRNAiKK	A	11.5	-2.3	0
TD2/PsiRNAiKK	A	22.7	10.5	0.5
TD2/PsiRNAiKK	R	23.4	31.2	3
TD2/PsiRNAiKK	A	20.7	1.3	0.5
TD2/PsiRNAiKK	A	20.7	12.6	0.5
TD2/PsiRNAiKK	R	23.4	64.6	3
TD2/PsiRNAiKK	A	11.9	1.9	1
TD2/PsiRNAiKK	R	23.2	54.1	3.5
TD2/PsiRNAiKK	A	21.2	16.7	2.5
TD2/PsiRNAiKK	A	11.5	-2	0
TD2/PsiRNAiKK	R	22.1	61	4.5
TD2/PsiRNAiKK	A	11.2	1	0.5
TD2/PsiRNAiKK	R	23	49.3	1.5
TD2/PsiRNAiKK	A	21.7	7.1	1.5
TD2/PsiRNAiKK	R	22.4	31.3	2
TD2/PsiRNAiKK	A	22.5	-5.1	0
TD2/PsiRNAiKK	A	22.7	6.1	0.5
TD2/PsiRNAiKK	R	21.9	20	3
TD2/PsiRNAiKK	A	22	10.9	3
TD2/PsiRNAiKK	A	22	-7.3	0
TD2/PsiRNAiKK	R	22.7	37.7	3.5
TD2/PsiRNAiKK	R	23.2	57	3.5
TD2/PsiRNAiKK	R	23	20.7	2
TD2/PsiRNAiKK	A	22	5.9	1
TD2/PsiRNAiKK	A	23.5	-1.5	0
TD2/PsiRNAiKK	A	22.7	6.9	1.5
TD2/PsiRNAiKK	R	23	30.9	4
TD2/PsiRNAiKK	R	23.7	40.1	2.5
TD2/PsiRNAiKK	A	11.5	-3.7	0
TD2/PsiRNAiKK	R	23.2	55	3.5
TD2/PsiRNAiKK	R	22.8	63.8	4.5
