# Supplementary material for: Drosophila PSI controls circadian period and the phase of circadian behavior under temperature cycle via tim splicing
Source: eLife journal article supplement (doi:10.7554/elife.50063), 2019-11-08
Supplement: supp [file elife-50063-supp-v1.zip › elife_poa_e50063_Figure_4_figure_supplement_1_source_data_2.xlsx]

## Sheet: Figure 3-S1
Top Panel
	Psi-RNAi(GD)/TD2			Psi-RNAi(GD)/+			TD2/+
	Mean	SEM	N (rhythmic flies)	Mean	SEM	N (rhythmic flies)	Mean	SEM	N (rhythmic flies)
20oC	23.64	0.06993	29	23.96	0.08547	23	24.9	0.1033	23
25oC	23.75	0.1326	17	24.2389	0.0418383	36	24.8	0.04147	34
30oC	23.06	0.1298	17	23.62	0.03932	24	23.65	0.06517	34
Two-way ANOVA followed by:
Tukey's multiple comparisons test	Mean Diff.	95.00% CI of diff.	Significant?	Summary	Adjusted P Value
20oC
TD2/+ vs. Psi-RNAi(GD)/TD2	1.26	1.013 to 1.507	Yes	****	<0.0001
TD2/+ vs. Psi-RNAi(GD)/+	0.94	0.6786 to 1.201	Yes	****	<0.0001
Psi-RNAi(GD)/TD2 vs. Psi-RNAi(GD)/+	-0.32	-0.5675 to -0.07251	Yes	**	0.0072
25oC
TD2/+ vs. Psi-RNAi(GD)/TD2	1.05	0.7867 to 1.313	Yes	****	<0.0001
TD2/+ vs. Psi-RNAi(GD)/+	0.5611	0.3491 to 0.7731	Yes	****	<0.0001
Psi-RNAi(GD)/TD2 vs. Psi-RNAi(GD)/+	-0.4889	-0.7497 to -0.228	Yes	****	<0.0001
30oC
TD2/+ vs. Psi-RNAi(GD)/TD2	0.59	0.3267 to 0.8533	Yes	****	<0.0001
TD2/+ vs. Psi-RNAi(GD)/+	0.03	-0.2063 to 0.2663	No	ns	0.9518
Psi-RNAi(GD)/TD2 vs. Psi-RNAi(GD)/+	-0.56	-0.841 to -0.279	Yes	****	<0.0001
Bottom Panel
	Psi-RNAi(KK)/TD2			Psi-RNAi(KK)/+			TD2/+
	Mean	SEM	N (rhythmic flies)	Mean	SEM	N (rhythmic flies)	Mean	SEM	N (rhythmic flies)
20oC	23.73	0.07826	16	23.83	0.0845	12	24.9	0.1033	23
25oC	23.61	0.1041	15	23.9967	0.0499387	30	24.8	0.04147	34
30oC	22.84	0.1522	17	23.53	0.03113	28	23.65	0.06517	34
Two-way ANOVA followed by:
Tukey's multiple comparisons test	Mean Diff.	95.00% CI of diff.	Significant?	Summary	Adjusted P Value
20oC
Psi-RNAi(KK)/TD2 vs. Psi-RNAi(KK)/+	-0.1	-0.425 to 0.225	No	ns	0.7481
Psi-RNAi(KK)/TD2 vs. TD2/+	-1.17	-1.447 to -0.8929	Yes	****	<0.0001
Psi-RNAi(KK)/+ vs. TD2/+	-1.07	-1.373 to -0.7669	Yes	****	<0.0001
25oC
Psi-RNAi(KK)/TD2 vs. Psi-RNAi(KK)/+	-0.3867	-0.6558 to -0.1175	Yes	**	0.0024
Psi-RNAi(KK)/TD2 vs. TD2/+	-1.19	-1.454 to -0.9262	Yes	****	<0.0001
Psi-RNAi(KK)/+ vs. TD2/+	-0.8033	-1.017 to -0.5901	Yes	****	<0.0001
30oC
Psi-RNAi(KK)/TD2 vs. Psi-RNAi(KK)/+	-0.69	-0.9517 to -0.4283	Yes	****	<0.0001
Psi-RNAi(KK)/TD2 vs. TD2/+	-0.81	-1.063 to -0.5572	Yes	****	<0.0001
Psi-RNAi(KK)/+ vs. TD2/+	-0.12	-0.3372 to 0.09721	No	ns	0.3943
