# Supplementary material for: Drosophila PSI controls circadian period and the phase of circadian behavior under temperature cycle via tim splicing
Source: eLife journal article supplement (doi:10.7554/elife.50063), 2019-11-08
Supplement: supp [file elife-50063-supp-v1.zip › elife_poa_e50063_Figure_4_source_data_1.xlsx]

## Sheet: Experiment 1
		TD2/+	TD2/PsiRNAiKK	PsiRNAiGD/+	w1118	Psi-RNAiKK/+	TD2/PsiRNAiGD
Day 7	00:00:00	17.375	20.2857	9.125	21.25	8.125	11.125
Day 7	00:30:00	46.8125	44.4286	63.625	46.875	43.0625	49.25
Day 7	01:00:00	49.8125	32.7857	54.375	56.875	46.75	42.875
Day 7	01:30:00	32.125	9.07143	29.875	22.75	19.0625	21.0625
Day 7	02:00:00	20.9375	8.35714	14.125	25.125	6.625	8.75
Day 7	02:30:00	27.75	9.92857	13.125	7.625	3.625	8.625
Day 7	03:00:00	17.8125	32.9286	18.0625	6.75	2.5	9.5625
Day 7	03:30:00	11.125	25	22.5	12.625	1.875	20
Day 7	04:00:00	13.8125	31	18.25	11.75	2.9375	40.3125
Day 7	04:30:00	14	45.2143	11.9375	14.75	3.1875	31.875
Day 7	05:00:00	18.4375	34.7857	18.25	6.5	10.8125	40.625
Day 7	05:30:00	34.3125	45.4286	16.1875	9	3.3125	35.4375
Day 7	06:00:00	35.875	29.5	15.25	16.75	12.6875	43.9375
Day 7	06:30:00	36.0625	34.9286	19.25	21.5	38.75	43.8125
Day 7	07:00:00	49.25	35.4286	27.3125	33.625	52.75	43.1875
Day 7	07:30:00	63.5	39.2143	36.25	43.75	50.6875	40.9375
Day 7	08:00:00	55.9375	40.5	49.1875	43.125	42.5625	40.875
Day 7	08:30:00	56.25	27.8571	47.625	67.5	52.0625	39.5625
Day 7	09:00:00	54.25	19.4286	39.6875	64.5	50.1875	35.75
Day 7	09:30:00	51.9375	29.7857	46.125	52	48	36.125
Day 7	10:00:00	57.125	17.6429	38.5625	58.125	40.5625	37.25
Day 7	10:30:00	60.875	19.5	39.25	55.75	46.75	27.9375
Day 7	11:00:00	54.625	13	31.6875	71.25	35.25	22
Day 7	11:30:00	56.9375	6.71429	28.375	60.625	28.375	19.875
Day 7	12:00:00	53.5	11.7143	21.5	41.125	18.4375	23.3125
Day 7	12:30:00	47.75	15.8571	16	22.25	7.25	25.125
Day 7	13:00:00	15.5625	2.42857	5.75	4.375	0	18.3125
Day 7	13:30:00	8.5	2.78571	3.9375	2	0	5.75
Day 7	14:00:00	4.5	0.571429	4.25	4.25	0	8.375
Day 7	14:30:00	1.75	1.64286	1.1875	5	0.125	2.6875
Day 7	15:00:00	6.125	2.78571	0.0625	3.75	0	7.625
Day 7	15:30:00	7.375	6.92857	0.875	17	0	9.1875
Day 7	16:00:00	5.625	10.1429	0.0625	8.125	0	10.8125
Day 7	16:30:00	2.9375	8.92857	0.8125	20.25	0	11.5
Day 7	17:00:00	5.6875	13.0714	3.125	6.75	0.9375	9.1875
Day 7	17:30:00	8.0625	5.42857	6.875	12.125	2.25	12.75
Day 7	18:00:00	8.375	11.2143	1.9375	17	4.3125	10.3125
Day 7	18:30:00	6.875	8.28571	14.5	23.875	1.4375	15.5
Day 7	19:00:00	9	19.9286	11.6875	14.875	2.5625	14.8125
Day 7	19:30:00	18.5	12.2857	3.1875	19.375	5.3125	11.0625
Day 7	20:00:00	16.8125	12.0714	15.6875	27.5	14.6875	12.875
Day 7	20:30:00	16.25	8.21429	15.8125	18.25	18.625	10.8125
Day 7	21:00:00	24.5625	18.1429	14.0625	34	14.5	20.6875
Day 7	21:30:00	18.25	7.35714	8.3125	34.625	12.4375	16.6875
Day 7	22:00:00	19.0625	9.71429	13	24.75	5.1875	7.5625
Day 7	22:30:00	17.5625	17	17.6875	18.5	10.8125	5.375
Day 7	23:00:00	16	8.35714	6.625	41	8.375	13.6875
Day 7	23:30:00	14.4375	1.71429	2.75	22.5	9.6875	12.75
Day 8	00:00:00	16.5625	12	7.75	12.25	5.375	14.5625
Day 8	00:30:00	46.25	44.0714	63.875	61.25	40.8125	41.375
Day 8	01:00:00	59.125	36.6429	49	67.25	47.4375	45.5625
Day 8	01:30:00	30.1875	9.5	31.1875	13.75	19	24.9375
Day 8	02:00:00	27.5	8.21429	17.75	10.625	4.75	10.4375
Day 8	02:30:00	15.5	10	17.125	7.625	0.9375	15.3125
Day 8	03:00:00	38.6875	17.0714	13.3125	5.875	3.1875	18.75
Day 8	03:30:00	16.25	24.8571	9.0625	5.75	0.5625	28
Day 8	04:00:00	13.875	25.2143	18.4375	4.75	5.875	19.3125
Day 8	04:30:00	15.3125	44.0714	27.0625	7.375	2.75	35.5625
Day 8	05:00:00	22.375	41	11.25	1.875	7.125	33.625
Day 8	05:30:00	33.5	39.6429	11.375	6.375	2.3125	27.5625
Day 8	06:00:00	23.6875	32.2143	20.625	1.125	14.125	37.5
Day 8	06:30:00	43.4375	32.2857	18.3125	4.125	42	42.3125
Day 8	07:00:00	37.0625	32.1429	20.5	32.875	48.6875	35.4375
Day 8	07:30:00	52.9375	32.5	42.125	43.875	51.25	37.25
Day 8	08:00:00	52.25	29	38.3125	55.75	54.9375	35.625
Day 8	08:30:00	51.875	21.4286	46.9375	60	45.1875	31.9375
Day 8	09:00:00	60.4375	21.2857	42.5	60.25	44.625	24.4375
Day 8	09:30:00	53.4375	24.2857	40.5625	51.375	40	28.875
Day 8	10:00:00	53.6875	19.7857	37.75	55	40.375	22.875
Day 8	10:30:00	58	6.92857	33.5625	53.375	36.9375	27.125
Day 8	11:00:00	54.6875	12.7857	25.4375	48.625	29.6875	21.375
Day 8	11:30:00	48.75	3.42857	20.1875	44.5	15.9375	20.375
Day 8	12:00:00	48.25	10.7857	25.1875	36.875	24.3125	15.25
Day 8	12:30:00	45.75	11.5714	18.625	23.125	5.5	30.5625
Day 8	13:00:00	8.8125	4.71429	9.1875	3.875	0	14.875
Day 8	13:30:00	8.375	1.78571	3.1875	2.375	0	3.8125
Day 8	14:00:00	5.5625	0.5	1.1875	9.75	0	4
Day 8	14:30:00	3.75	1.64286	1.9375	20.875	0	0.625
Day 8	15:00:00	1.3125	2.57143	0	10.375	0	12.3125
Day 8	15:30:00	1.875	5	1.875	11.625	1.3125	9.5625
Day 8	16:00:00	6.25	10.7857	6.125	6.625	0	6.8125
Day 8	16:30:00	14.625	11.4286	5.3125	18.75	0	8.4375
Day 8	17:00:00	4.625	7.85714	2.125	3.125	0.5625	17.9375
Day 8	17:30:00	4.5625	9.35714	0.5	10.75	1.5	8.375
Day 8	18:00:00	11.375	13.0714	2.1875	8	1.9375	10.625
Day 8	18:30:00	5.375	8.78571	3.5625	25.625	4.125	15.375
Day 8	19:00:00	11.3125	7.5	12.1875	19	9.625	16.6875
Day 8	19:30:00	9.0625	10.5714	14	34.25	8.8125	12.8125
Day 8	20:00:00	19.375	7.5	19.8125	41.875	11.5625	8.875
Day 8	20:30:00	17.875	7.21429	22.1875	34.375	9.6875	6.1875
Day 8	21:00:00	18.375	4.78571	5.9375	31.625	11.625	6.125
Day 8	21:30:00	15.9375	12	9.0625	33.75	7.75	7.125
Day 8	22:00:00	16.75	7.64286	9.25	27.125	12.375	7.5625
Day 8	22:30:00	20	8.21429	6.25	26.125	6.25	12
Day 8	23:00:00	13.75	15.6429	11.5	20.375	16.75	16.1875
Day 8	23:30:00	14.5625	12.2857	11.625	12.5	13.3125	22.125
Day 9	00:00:00	18.9375	9.14286	11.5625	16.5	8	19.5625
Day 9	00:30:00	47.375	39.5	65.375	46.875	36.25	33.4375
Day 9	01:00:00	52.375	37.6429	44.5	50.875	51.0625	37.375
Day 9	01:30:00	30.8125	7.57143	20.6875	25.375	19.9375	23.8125
Day 9	02:00:00	19.6875	7.85714	11.625	6.375	12.25	13.1875
Day 9	02:30:00	19.6875	13.9286	17.5625	5.25	5.8125	12.625
Day 9	03:00:00	13.0625	22.4286	6.3125	1.875	4.8125	20.375
Day 9	03:30:00	10.5625	33.6429	7.5625	10.375	4.1875	19.625
Day 9	04:00:00	15.3125	28.5714	11	2	9	27.75
Day 9	04:30:00	12.75	37.1429	17.75	9.625	0.25	23.125
Day 9	05:00:00	22.125	39.1429	15.4375	2.25	7.9375	22.8125
Day 9	05:30:00	24.625	27.3571	23.1875	9	7.125	31.0625
Day 9	06:00:00	24.9375	33.5	8.9375	19.375	32.3125	28
Day 9	06:30:00	36.5625	25.9286	29.0625	12.125	41.875	26.6875
Day 9	07:00:00	41.125	32	37.25	22.75	36.3125	28.9375
Day 9	07:30:00	48.5625	29.5714	38.875	32.75	43.8125	28
Day 9	08:00:00	55.625	24	36	50.875	50.375	28.0625
Day 9	08:30:00	47.4375	19.4286	36.875	59	43.0625	23.375
Day 9	09:00:00	46.125	19.5714	33.375	48.375	38.25	19
Day 9	09:30:00	55.25	18	33.875	52.625	32.25	14.8125
Day 9	10:00:00	53.1875	16.2143	33.5625	53.5	35.4375	21.125
Day 9	10:30:00	52.375	14.6429	29.3125	53.875	22.25	21.1875
Day 9	11:00:00	45.9375	10.0714	31.375	39.125	20.6875	18.1875
Day 9	11:30:00	48.6875	12.0714	25.5625	37.125	19.375	22
Day 9	12:00:00	45.9375	2.5	23.5625	27.375	13.5625	20.125
Day 9	12:30:00	44.875	8.07143	14.5	26.75	4.3125	22
Day 9	13:00:00	19.6875	6.64286	12.875	7	0	6.625
Day 9	13:30:00	13.8125	1.92857	3.25	4.625	0.3125	5.6875
Day 9	14:00:00	3.3125	0.0714286	9.3125	1.875	0	7.5625
Day 9	14:30:00	2.6875	1	0.5	10.125	0.3125	4.875
Day 9	15:00:00	4.375	6.85714	0.1875	10.875	0.1875	6.5
Day 9	15:30:00	2.375	12.4286	0.375	7.5	0	3.375
Day 9	16:00:00	2.6875	11.5714	3.4375	2.5	0.125	7.1875
Day 9	16:30:00	8.75	3.42857	0.5625	3.375	4.125	13.625
Day 9	17:00:00	3.25	15.3571	3.75	16	2.625	19.1875
Day 9	17:30:00	4.625	11.6429	3.25	4.875	5.9375	6.375
Day 9	18:00:00	10.75	19.9286	6.5625	3.75	4.1875	11.25
Day 9	18:30:00	20.8125	14	10.875	12.75	1	10.5
Day 9	19:00:00	9.1875	5.07143	13.1875	10.25	3.75	14.4375
Day 9	19:30:00	12.25	12.3571	8.5625	13.875	7.3125	11.8125
Day 9	20:00:00	16.0625	17.2143	15.75	15.875	10.75	14.6875
Day 9	20:30:00	20	6.07143	10.4375	21.875	11.6875	8.8125
Day 9	21:00:00	14.5	12.5	10.1875	19.375	12.625	10.25
Day 9	21:30:00	17.8125	9.78571	17.0625	20.125	8.75	10.4375
Day 9	22:00:00	15.375	6.71429	8.4375	20.125	8.5	6.875
Day 9	22:30:00	21.3125	6.78571	6.5	22.25	6.625	9.875
Day 9	23:00:00	13.6875	16.8571	11	24.375	4.75	11.375
Day 9	23:30:00	17	13.4286	10.3125	6.25	6.3125	10.5625
Day 10	00:00:00	12	4.21429	6.8125	8.125	12.75	14.3125
Day 10	00:30:00	41.375	25.7857	54	60	35.0625	35.1875
Day 10	01:00:00	46.5	39.2857	56.625	42.625	33.875	32.5625
Day 10	01:30:00	34	23.6429	33.5	21.625	16.9375	17.875
Day 10	02:00:00	24.1875	10	22.1875	4.625	9.4375	7.8125
Day 10	02:30:00	10.75	8.64286	20.6875	5.75	9.0625	9.25
Day 10	03:00:00	17.0625	13.9286	18.1875	3	6.75	12.1875
Day 10	03:30:00	14.5	21.0714	15.4375	8	3.1875	21
Day 10	04:00:00	18.625	26.1429	13.1875	4.5	6.125	18.1875
Day 10	04:30:00	15.75	29.7857	9	0.75	5.375	23.5
Day 10	05:00:00	14.5	30.2143	7.8125	3.5	0.0625	21.625
Day 10	05:30:00	17.125	27.5	8.8125	1.125	15.6875	20.875
Day 10	06:00:00	32.75	29.2143	19.125	0	36.1875	28.3125
Day 10	06:30:00	40.8125	22.0714	26.25	0.5	47.9375	22.5625
Day 10	07:00:00	42.0625	28.5	23.0625	11.25	47.8125	22.25
Day 10	07:30:00	53.25	26.6429	27.375	39.375	45.0625	24.0625
Day 10	08:00:00	55.0625	23.2857	32.75	45.125	44.5	18.25
Day 10	08:30:00	43.5625	18.0714	36.75	46.875	40.125	19.375
Day 10	09:00:00	48.125	17.2857	30	49.125	35.25	19.6875
Day 10	09:30:00	48.4375	15.2857	28.6875	51.5	32.5	16.625
Day 10	10:00:00	42.375	16.7143	29.1875	49.25	34.5625	18.25
Day 10	10:30:00	50.25	11.7143	35.9375	47.875	29.5	13
Day 10	11:00:00	49.75	15.0714	27.75	35.5	20.8125	11.75
Day 10	11:30:00	44.125	9.28571	17.375	34.75	19.8125	10.5625
Day 10	12:00:00	40.375	7.28571	21.9375	25.5	19.8125	9.6875
Day 10	12:30:00	42.4375	12.9286	12.9375	18.125	4.6875	19.3125
Day 10	13:00:00	21.1875	8.28571	2.625	7.5	0	9.5
Day 10	13:30:00	10.1875	2.28571	1.25	5	0	5.4375
Day 10	14:00:00	9.875	1.57143	1	8.5	0.6875	3.5625
Day 10	14:30:00	9.5625	0.214286	1	13.625	0.3125	1.25
Day 10	15:00:00	3.3125	1.64286	3	7.375	0.0625	4.375
Day 10	15:30:00	5	5.21429	5.3125	3.25	0.25	9.4375
Day 10	16:00:00	6.9375	6.28571	2.3125	5.125	1.5625	11.625
Day 10	16:30:00	5.875	9.07143	6.8125	11.875	0.5	13.6875
Day 10	17:00:00	4.875	0.857143	2.125	9.125	0	10.125
Day 10	17:30:00	8.6875	13.0714	1.8125	9.5	1.125	10.1875
Day 10	18:00:00	6.4375	5.35714	5	14.375	0.9375	8.8125
Day 10	18:30:00	5.875	6.57143	3.3125	14.75	4.125	6.8125
Day 10	19:00:00	13.125	13.7857	7.5	3.125	5.8125	10.9375
Day 10	19:30:00	8.125	7.78571	16.875	19.375	3.9375	13.3125
Day 10	20:00:00	5.8125	4.14286	13.0625	20.625	8.3125	10.6875
Day 10	20:30:00	13.4375	5.64286	7.8125	34.375	8.0625	5.6875
Day 10	21:00:00	16.375	11.7857	17.875	30.375	10.6875	7.1875
Day 10	21:30:00	22.9375	6.14286	9.25	23.875	7.6875	6.875
Day 10	22:00:00	18.1875	6.92857	5.875	18.625	5.9375	5.375
Day 10	22:30:00	16.4375	8.28571	11.0625	24.25	5.5625	7
Day 10	23:00:00	18.3125	10.8571	5.1875	11	9.0625	11
Day 10	23:30:00	15.5625	6.57143	6.5625	26.375	7.5625	10.625

## Sheet: Experiment 2
		PsiRNAiGD/+	w1118	TD2/PsiRNAiKK	PsiRNAiKK/+	TD2/PsiRNAiGD	TD2/+
Day 7	00:00:00	4.25	21.9375	14.25	4.8125	7.8125	16.3125
Day 7	00:30:00	31	68.6875	43.375	37.4375	41	27
Day 7	01:00:00	46.8125	56.3125	33	35.875	40.875	21.6875
Day 7	01:30:00	35.5625	25.25	15.875	20.25	38	23.3125
Day 7	02:00:00	32.0625	22	15.5625	12.3125	26.75	22.5
Day 7	02:30:00	32.5	8.9375	26.125	8.8125	37.875	24.5
Day 7	03:00:00	18.8125	3.5625	16	3.1875	15.1875	33.75
Day 7	03:30:00	24.125	6.8125	38.9375	8.375	33.75	22.9375
Day 7	04:00:00	24.5	2.1875	55.125	2.0625	33	34.1875
Day 7	04:30:00	24	6.25	47.8125	19.3125	32.375	36.9375
Day 7	05:00:00	37.3125	3.9375	48.625	18.9375	41.9375	46.625
Day 7	05:30:00	39.5	7.9375	36.0625	38.1875	41.0625	46.3125
Day 7	06:00:00	42.5625	13.5625	47.625	55.5625	44.875	46.5625
Day 7	06:30:00	49.375	41.125	29.9375	42.4375	44.9375	60.4375
Day 7	07:00:00	61	52.5	26.8125	49.1875	43	49.5625
Day 7	07:30:00	61.125	85.6875	20.4375	53.5	43.5625	52.875
Day 7	08:00:00	62	85.75	24.25	52.5625	41.75	51.4375
Day 7	08:30:00	56.9375	86.8125	23.3125	40.0625	38.9375	45.6875
Day 7	09:00:00	62.25	85.3125	19.125	53.625	36.25	49.1875
Day 7	09:30:00	46.25	84.1875	18.75	41.4375	42.75	45.125
Day 7	10:00:00	44.3125	86.5625	7.9375	32.25	37.75	44.4375
Day 7	10:30:00	41.75	83.25	11.375	25.1875	38.125	53.125
Day 7	11:00:00	32.3125	77.75	17.1875	10.4375	30.4375	44.625
Day 7	11:30:00	32.9375	70.9375	16.3125	10	33.25	38.1875
Day 7	12:00:00	32.5	58.75	11.625	5.1875	30.625	42.5
Day 7	12:30:00	28.6875	19	6.875	1.6875	35.4375	32.4375
Day 7	13:00:00	12.6875	0.0625	3.4375	0	24.625	10.4375
Day 7	13:30:00	3.875	0	1.875	1.1875	11.5	1.0625
Day 7	14:00:00	0.8125	0	0.0625	0	1.6875	2.9375
Day 7	14:30:00	0.0625	1.5625	1.25	0	0	2.625
Day 7	15:00:00	2.1875	0	0	0	2.9375	8.75
Day 7	15:30:00	0.5625	0.1875	3.75	0.3125	3.6875	2.75
Day 7	16:00:00	0.9375	2.1875	2.9375	0.0625	4.0625	5.125
Day 7	16:30:00	0.9375	0.4375	2.25	0.1875	11.5	6.4375
Day 7	17:00:00	6.875	2.375	12.25	0	7.125	3.5625
Day 7	17:30:00	2.25	4.9375	3.1875	0	8.9375	8.5
Day 7	18:00:00	3.75	3.6875	12	0	7.875	9.5625
Day 7	18:30:00	3.8125	6	7.5625	0.4375	11.1875	2.1875
Day 7	19:00:00	7.5625	4.9375	8.375	0.5625	9.0625	4.25
Day 7	19:30:00	8.25	17.6875	14.5	3.875	12.625	14.1875
Day 7	20:00:00	4.6875	7.6875	4.75	2.6875	8.25	8
Day 7	20:30:00	5.5625	7.0625	6.75	3.8125	10.375	7.4375
Day 7	21:00:00	10.25	12.75	3.375	4.3125	10.75	12.375
Day 7	21:30:00	13.8125	27	5.4375	8.5	10.375	14.8125
Day 7	22:00:00	5.3125	25.6875	4.4375	8.8125	9.375	14.6875
Day 7	22:30:00	6.25	33.1875	7.375	8.25	9.375	16.125
Day 7	23:00:00	6.875	23.625	7	9.875	10.0625	10.0625
Day 7	23:30:00	6.6875	30.1875	6.875	6.4375	9.25	7.25
Day 8	00:00:00	8.4375	19.75	7.8125	8	15.375	11.6875
Day 8	00:30:00	32.625	46.75	33.9375	21.9375	39.75	32.875
Day 8	01:00:00	32.3125	52.3125	33.125	24.6875	39.375	13.9375
Day 8	01:30:00	23.625	24.625	12.25	14	26.5625	18.5625
Day 8	02:00:00	38.5	15.1875	15	7	29.1875	12.6875
Day 8	02:30:00	17.375	8.625	25	7.3125	31.75	13.625
Day 8	03:00:00	33.625	4.875	34.5	4.5625	31.3125	7.125
Day 8	03:30:00	21.375	0	41.1875	6.3125	34.4375	26.875
Day 8	04:00:00	7	0	42.6875	13.3125	42.0625	28.6875
Day 8	04:30:00	23.625	1	44.8125	14.5	42.0625	26.9375
Day 8	05:00:00	36.6875	0.4375	36.375	39.9375	41.6875	34.3125
Day 8	05:30:00	26.3125	3.625	32.8125	52.1875	35.6875	40.6875
Day 8	06:00:00	46.125	19.5625	38.25	49.0625	32.6875	56.875
Day 8	06:30:00	53.3125	50.625	36.375	56.125	40.875	48.75
Day 8	07:00:00	54.0625	74.3125	23.3125	53.4375	33.6875	49.875
Day 8	07:30:00	54.5	80.6875	32.1875	49.8125	32.4375	55.625
Day 8	08:00:00	62.75	81.625	19.0625	48.1875	39.8125	51.125
Day 8	08:30:00	62.75	86	15.875	43.125	35.875	48.3125
Day 8	09:00:00	49.375	81.75	18.5625	40.5	32.4375	41.1875
Day 8	09:30:00	45.8125	84.625	16.75	26	34.6875	40.4375
Day 8	10:00:00	44.6875	79	20.8125	26.375	32.1875	46.1875
Day 8	10:30:00	36.9375	73.5	17.625	19.0625	31.125	43.25
Day 8	11:00:00	46	65.0625	6.8125	18.6875	24	36
Day 8	11:30:00	38.5625	52.6875	15.875	8.625	22.3125	37.5625
Day 8	12:00:00	38.25	38.875	12.4375	2.125	19.4375	39.1875
Day 8	12:30:00	25.8125	17.3125	9.5625	1.1875	31.6875	34.5
Day 8	13:00:00	9.5625	0	4.6875	0.6875	14.3125	8.9375
Day 8	13:30:00	0.8125	0	0.9375	0	8.25	0.5
Day 8	14:00:00	2.5	0.125	0	0	2.25	3.25
Day 8	14:30:00	0.5	0.5625	0	0	0.25	0
Day 8	15:00:00	0.0625	0.3125	1	2.4375	3.75	0.4375
Day 8	15:30:00	0.9375	0.8125	1.625	0	0.375	1.125
Day 8	16:00:00	0.25	0	10.125	1.1875	7.1875	3
Day 8	16:30:00	0.0625	0.375	6.8125	0	5.8125	2.5
Day 8	17:00:00	0.4375	1.3125	6.25	0.4375	8.625	3.3125
Day 8	17:30:00	0.6875	1.9375	6.5	0	12.8125	7.5
Day 8	18:00:00	1.875	0.9375	11.625	0.8125	15.6875	5.875
Day 8	18:30:00	3.125	1.875	10.1875	1.4375	19.1875	3.625
Day 8	19:00:00	3.3125	4.5	5.5625	0.75	7.8125	3.625
Day 8	19:30:00	5.3125	6.0625	6	0.1875	7.0625	8
Day 8	20:00:00	4.8125	5.3125	7	1.9375	5.625	12
Day 8	20:30:00	5.875	13.9375	3.375	3	13	18.25
Day 8	21:00:00	11.875	20.375	7.9375	2.3125	3.1875	3.75
Day 8	21:30:00	14.8125	21.8125	1.875	10.625	1.625	5.375
Day 8	22:00:00	7.1875	17.25	5.1875	6.125	8.9375	14.875
Day 8	22:30:00	4.0625	14.75	6.5	4.625	13.625	18.3125
Day 8	23:00:00	4.875	13.8125	4.4375	3.5	19.3125	12.1875
Day 8	23:30:00	6.0625	23.9375	6.875	2.4375	15.4375	10.3125
Day 9	00:00:00	12.0625	17.9375	13	3.6875	19.125	13.8125
Day 9	00:30:00	28.375	46.5625	37.125	22.3125	39.5	29.5625
Day 9	01:00:00	34.9375	43.9375	28.8125	24.125	37.125	28.5625
Day 9	01:30:00	25.375	26.4375	15.375	16.8125	28.125	20.4375
Day 9	02:00:00	21.5	7.8125	14.75	13.125	24.1875	15.75
Day 9	02:30:00	16.9375	6.625	20.8125	11.625	22.5625	10.5625
Day 9	03:00:00	23.8125	5.25	29.625	7.5	24	16.9375
Day 9	03:30:00	28.5	4.125	45.375	11.0625	31.125	35.9375
Day 9	04:00:00	11.5	2.0625	43.3125	16.3125	33.5	9.75
Day 9	04:30:00	19.6875	7.375	43.3125	12	32.9375	21.375
Day 9	05:00:00	34.6875	6.5625	41.6875	42.875	31.1875	36.75
Day 9	05:30:00	21.125	12.8125	39.5	58.5625	33.375	29.25
Day 9	06:00:00	45	20.9375	28.4375	51.9375	32.4375	42.5625
Day 9	06:30:00	51.125	58.4375	28.875	56.75	32.625	60.5
Day 9	07:00:00	59.5625	72.6875	22.0625	47.3125	28.9375	45.375
Day 9	07:30:00	53.75	81.0625	25.625	42.3125	31.5	41.5625
Day 9	08:00:00	44.6875	89.125	28	41.625	29.6875	52.8125
Day 9	08:30:00	51.0625	80.3125	16.0625	33.875	33.125	50.5
Day 9	09:00:00	55.9375	83.1875	11.125	36.625	30.0625	49.25
Day 9	09:30:00	35.0625	82.625	16.75	27.375	28.375	41.3125
Day 9	10:00:00	45.9375	81.875	16.0625	18.0625	23.5	47.625
Day 9	10:30:00	37.375	77.9375	10.125	18.4375	21.9375	47.125
Day 9	11:00:00	30.8125	59.1875	15.5625	8.25	21.625	39.25
Day 9	11:30:00	33.6875	50.9375	13.125	9.9375	16.8125	53.75
Day 9	12:00:00	32	30.5	10.75	4.0625	17.3125	33.4375
Day 9	12:30:00	24	13.1875	10.25	1.75	30.75	32.125
Day 9	13:00:00	17.3125	0	4.5625	0	24.75	15
Day 9	13:30:00	5.375	0	1.4375	0	4.9375	3.5625
Day 9	14:00:00	0.125	0	0	0.5625	1.4375	4.3125
Day 9	14:30:00	0.75	0.125	0	0	1.5	8.125
Day 9	15:00:00	0.0625	1	0	0.125	1.125	3.5625
Day 9	15:30:00	0.1875	0.125	0	0.6875	6.125	1.8125
Day 9	16:00:00	0	0.75	2.875	0.0625	6.3125	1.5625
Day 9	16:30:00	0.1875	1.25	13.75	0.0625	2.1875	2.5
Day 9	17:00:00	0.125	1.3125	4.75	1.4375	7.125	2.625
Day 9	17:30:00	0.3125	3.875	4.5	1.0625	13.9375	16.125
Day 9	18:00:00	1.8125	4.6875	10.8125	0	11.375	8.1875
Day 9	18:30:00	1.1875	4.375	9.1875	2.75	13.3125	5.625
Day 9	19:00:00	0.5625	2.25	1.125	1.6875	11.0625	3.5
Day 9	19:30:00	3.0625	2.625	4.1875	1.0625	11.875	7.125
Day 9	20:00:00	5.25	6	11.375	1.4375	6.5625	9.6875
Day 9	20:30:00	10.25	13.8125	11	3.9375	4.9375	12.9375
Day 9	21:00:00	8.9375	18.625	10.75	4.625	10.875	5.75
Day 9	21:30:00	1.5	19.3125	3.4375	9.375	8.6875	10.875
Day 9	22:00:00	9.625	18.6875	5.875	4.0625	9.9375	8.6875
Day 9	22:30:00	5.625	29.4375	7.125	6.75	10.8125	10.5625
Day 9	23:00:00	9.8125	21.25	5.4375	3.125	7.6875	17.625
Day 9	23:30:00	7.75	12.375	8.625	4.1875	14.9375	10.6875
Day 10	00:00:00	4.75	7.4375	6.6875	12.625	18.5	6.0625
Day 10	00:30:00	22.6875	50.4375	37.9375	22.8125	35.75	16.875
Day 10	01:00:00	37.3125	49.3125	32.5625	14.25	32	23.5625
Day 10	01:30:00	23.8125	29.875	19.75	16.875	27	12.4375
Day 10	02:00:00	26.3125	13.3125	12.6875	15.5625	21.125	7.75
Day 10	02:30:00	15.3125	2.6875	14.5625	5.8125	21.1875	13
Day 10	03:00:00	10.375	0.25	36.5625	13.5625	22.875	26.3125
Day 10	03:30:00	13.5	1.625	33.0625	10.5	23.625	12.6875
Day 10	04:00:00	7.375	0.625	36.8125	25.875	27.9375	19.1875
Day 10	04:30:00	23.6875	1	35.3125	30.625	25.5	13.8125
Day 10	05:00:00	27.3125	3.3125	29.5	47.5625	25.125	18.625
Day 10	05:30:00	33.125	10.25	28.625	50.8125	26.125	35.25
Day 10	06:00:00	49.1875	24.125	31.8125	51.3125	23.375	42.0625
Day 10	06:30:00	64.5	50.4375	29.125	50.9375	21.6875	35.875
Day 10	07:00:00	48.4375	73	28.75	45.6875	17.625	53.25
Day 10	07:30:00	42.4375	76.5625	26.875	48.625	27.1875	45.5
Day 10	08:00:00	58.0625	73.1875	14.875	37.375	21	39.9375
Day 10	08:30:00	49.4375	76.1875	19.25	33.9375	25.4375	46.9375
Day 10	09:00:00	45.5625	76.9375	20.4375	23.4375	21.3125	51.1875
Day 10	09:30:00	38.875	67.0625	21.25	25.8125	20.5	36.75
Day 10	10:00:00	38.5	69.6875	14	13.8125	20.625	35.8125
Day 10	10:30:00	44.4375	59.625	8.4375	17.0625	15.75	42.625
Day 10	11:00:00	27.5625	50.125	19.625	13.8125	14.5	41.125
Day 10	11:30:00	29.6875	42.875	17.1875	6.4375	15.5	37.75
Day 10	12:00:00	33	23.5625	9.1875	2.75	10.9375	30.5
Day 10	12:30:00	24.25	19	6.625	2.3125	17.5625	30.5
Day 10	13:00:00	17.9375	2.75	0.3125	0	5.625	13.8125
Day 10	13:30:00	5.3125	1.25	0.1875	0	0.9375	5.0625
Day 10	14:00:00	0.5	1	0	0.1875	4.5	3.4375
Day 10	14:30:00	4.1875	0.0625	0.6875	0.1875	2.9375	13.3125
Day 10	15:00:00	0	2.4375	0.5625	0.9375	4.875	8
Day 10	15:30:00	0	0.5	1.9375	0.75	11.3125	2.0625
Day 10	16:00:00	0	4.875	7.75	0	2.75	2.5625
Day 10	16:30:00	2.75	3.8125	2.4375	0.25	5.375	3.125
Day 10	17:00:00	0	1.5	4.9375	0	12.125	3.0625
Day 10	17:30:00	0.75	3.875	9.625	1.875	7.1875	2.6875
Day 10	18:00:00	0.625	1.25	7.625	0.875	7.1875	4.25
Day 10	18:30:00	9.0625	5.6875	8.8125	0.125	10.75	15
Day 10	19:00:00	4	8.375	9.4375	1.6875	8.625	10.3125
Day 10	19:30:00	2.375	15	9.625	4.8125	8.1875	5.375
Day 10	20:00:00	2.5	15.8125	2.0625	2.125	6.8125	5.3125
Day 10	20:30:00	3	14.4375	3.5625	1.75	7.125	8.4375
Day 10	21:00:00	10.1875	13.125	3.6875	3.0625	8.375	14.375
Day 10	21:30:00	7	20	2.5	6.1875	10.5625	9.125
Day 10	22:00:00	4.75	23.9375	4.875	2.625	8.9375	4.3125
Day 10	22:30:00	9.625	20.4375	8.6875	4.5625	8.375	13.9375
Day 10	23:00:00	11.0625	12.125	8.75	8.3125	14.5625	8.5625
Day 10	23:30:00	9.125	17.4375	7.4375	3.1875	14.5	8.375

## Sheet: Experiment 3
		TD2/VIE260B	PsiRNAiKK/+	TD2/+	TD2/PsiRNAiKK	VIE260B/+	TD2/Rbp9RNAiKK	TD2/larpRNAiGD	PsiRNAiGD/+	Rbp9RNAiKK/+	TD2/PsiRNAiGD	larpRNAiGD/+	w1118
Day 7	00:00:00	18.25	15.6875	11.25	12.375	12.8125	12.875	19.5625	9.5625	8.5625	12.5625	6.25	20.125
Day 7	00:30:00	68.6875	76.5	88.75	45.5625	53.0625	58.9375	54.5	106.312	58.5625	64	61.375	112.062
Day 7	01:00:00	47.3125	46.625	43.5	35.9375	39.5	56.3125	62.875	50.25	51.5625	36.0625	48.375	50.0625
Day 7	01:30:00	19.3125	18.9375	21.3125	11	6.875	38.3125	42.1875	21.125	15.875	20.75	24.5625	14.875
Day 7	02:00:00	14	9.25	16	6.4375	1.5625	30.4375	27.6875	30.625	13.0625	18.375	9	6.125
Day 7	02:30:00	9.6875	2.6875	13.625	3	1	25.875	22.25	11.3125	16.4375	11.6875	8.1875	4.5625
Day 7	03:00:00	8.875	2.9375	5.0625	3.9375	0.1875	14.4375	26.4375	11.125	12.8125	12.875	9.625	7.8125
Day 7	03:30:00	15.375	1.125	16.0625	6.6875	0.0625	28.1875	19.0625	16.125	9.75	6.6875	6.375	0.0625
Day 7	04:00:00	6.8125	1.625	9.375	10.75	0	23.25	15.5	17.8125	10.5625	5.4375	3.3125	1.0625
Day 7	04:30:00	3.3125	0.1875	6.4375	24.25	0	25.5625	16.4375	11.3125	7.9375	2.75	5.4375	3.4375
Day 7	05:00:00	7.25	3	7.1875	36.1875	0.0625	12.1875	13.125	11.0625	4.375	7.375	6	0.875
Day 7	05:30:00	4.4375	5.625	14.0625	32.8125	0.125	24.375	12.3125	2.9375	7.875	20.6875	8.3125	0
Day 7	06:00:00	5	13.375	23.125	27.0625	0	28.0625	17.1875	2.0625	16	27.5625	14.0625	0.875
Day 7	06:30:00	16.875	23.0625	25.875	35.25	2.4375	22.375	23.875	0.25	20.75	25.8125	29	0.3125
Day 7	07:00:00	12.6875	27.4375	24.1875	33.1875	1	49.5625	23.3125	1.25	37.4375	21.6875	37.4375	0.0625
Day 7	07:30:00	20	57.0625	42.3125	36.5625	22.75	40	37.25	12.0625	50.1875	28.3125	56.625	0
Day 7	08:00:00	39.375	50.125	39.625	22.9375	34.6875	53.8125	44.5	12.75	50.3125	27.875	64.6875	5.6875
Day 7	08:30:00	45.9375	52.0625	42.25	25.5625	43.625	59.875	45.1875	20.5	54.3125	25.625	52.4375	10.0625
Day 7	09:00:00	47.8125	51.75	41.75	22.5	49.5	62.0625	40	21.6875	50.625	22	54.9375	22.5625
Day 7	09:30:00	51.125	45	44.0625	18.9375	59.0625	56.125	41	26.875	43.625	25.375	58.75	47.5625
Day 7	10:00:00	55.0625	38.625	49.25	16.0625	56.5625	60.5	39.25	35.9375	43.875	25.9375	57.125	65.4375
Day 7	10:30:00	59.375	34.5	45.3125	12.75	55	58.9375	38.9375	38.0625	39.625	20.9375	53.5	86.125
Day 7	11:00:00	58.75	33.625	43.375	14.8125	51.125	56.5	40.6875	46.375	33.9375	22.875	53	98.4375
Day 7	11:30:00	54.8125	24.875	47.125	18.0625	36.375	53.25	38.75	44.5625	35.8125	21.6875	40.625	94.375
Day 7	12:00:00	32.125	24	28.625	5.3125	24.8125	46.9375	35.75	36.875	20.375	18.25	42	93.4375
Day 7	12:30:00	27	7.5625	31.4375	7.4375	12.6875	29	63.875	29.875	13.375	37.5625	34.875	46.6875
Day 7	13:00:00	9.9375	0.0625	15.3125	3.0625	0	0.125	48.4375	34.5625	0.25	16.625	7.4375	13.75
Day 7	13:30:00	3.5	0	6	2.5	0.8125	0.3125	24.4375	7.5	0.0625	3.5	0.25	4.875
Day 7	14:00:00	4.5	0	7.1875	0	0.0625	0.3125	12.8125	5.25	0.1875	8.5625	0.5	1.0625
Day 7	14:30:00	0.375	0	1.9375	0.125	0	0.5625	3	3.8125	2.5625	2.9375	2.4375	3.1875
Day 7	15:00:00	0	0.125	3.9375	0.75	0.125	0.625	1.9375	0.75	1.1875	2.6875	1.125	6.5625
Day 7	15:30:00	0	1	1.3125	3.875	0.9375	2.5625	1.5	1.3125	0.125	1.5625	1.375	2.1875
Day 7	16:00:00	0.25	1.375	8.375	1.4375	0.3125	3.9375	0.25	4.625	0.0625	1.0625	4.375	2.125
Day 7	16:30:00	0.875	0.125	7.6875	6.3125	0.75	5	2.1875	1.5	2.0625	3.375	3.0625	6
Day 7	17:00:00	1	0.0625	8	9.0625	1.875	0.8125	3.9375	0.75	3.25	18.5625	3.875	5.8125
Day 7	17:30:00	1.5625	1.5625	4.5625	2.125	0.3125	1.75	4.1875	3.8125	1.375	10.5625	4.6875	4.0625
Day 7	18:00:00	0	3.875	4.5625	5.75	1	7.5	0.8125	4.8125	1.875	6.0625	3.75	6.5625
Day 7	18:30:00	0	3.4375	13	3.8125	0.25	3.0625	3.75	3.375	4.75	12.3125	2.5	22.1875
Day 7	19:00:00	1.125	3.1875	18.3125	21	8.1875	3.6875	5.875	1.1875	4.1875	10	3.25	12.1875
Day 7	19:30:00	3.9375	7.4375	12.5625	20.0625	4.625	11.25	17.5	4.6875	7.875	13.5	14.25	12.875
Day 7	20:00:00	8.4375	7.8125	9.0625	6.9375	7.125	10.8125	26	6.25	10.8125	22.5625	13.875	22.6875
Day 7	20:30:00	10.125	9.25	19.125	7.4375	10	11	22.9375	16	8.4375	26.3125	15.9375	29.6875
Day 7	21:00:00	3.4375	4.6875	13	5.75	6.9375	12.625	19.1875	21.6875	16.25	13.9375	12.6875	38.5625
Day 7	21:30:00	3.75	16.75	16.6875	5.4375	7.125	8	21.3125	25.625	8.3125	15.25	14	46.9375
Day 7	22:00:00	0.1875	13.9375	19.0625	3.8125	16.5	10.75	17.6875	11.75	20.5	17.875	12.25	34.4375
Day 7	22:30:00	4.875	13.5625	26	5.625	13.4375	12.5	7.6875	14.125	16.5	11.6875	8.5625	46.875
Day 7	23:00:00	8.8125	13.5	18.75	4.625	18.8125	14.875	9.5625	18.6875	12.875	15.25	9.375	34.4375
Day 7	23:30:00	4.0625	7.875	14.25	5.4375	13.6875	15.4375	8	9.125	12.8125	12.375	10.625	22.5
Day 8	00:00:00	25.875	12.8125	10.1875	6.0625	7.0625	19.6875	21.6875	6.5	17.0625	13.4375	10.625	31.3125
Day 8	00:30:00	74.6875	73.3125	84.3125	46.4375	56.375	51.25	54.75	96.75	52.4375	67.125	69.625	107.75
Day 8	01:00:00	43.0625	44.0625	42.25	31.25	37.375	66.5625	56.125	49.375	51.875	27.8125	52.75	52.4375
Day 8	01:30:00	19.75	13.25	28.5625	16.1875	9.75	42.5625	31.8125	24.125	20.375	16.5	28.8125	15.5625
Day 8	02:00:00	14	9.9375	13.0625	4.875	1.0625	28.625	17.8125	22	9.375	9.6875	15.4375	2.75
Day 8	02:30:00	12.1875	10.0625	15.3125	2.9375	1.0625	22.8125	29.0625	26.75	6.375	8.375	13.9375	4.5
Day 8	03:00:00	6.5	7.0625	20.875	5.3125	0.25	16.1875	20.4375	23.1875	9	11.375	10.25	1
Day 8	03:30:00	13.9375	1.625	9.75	8.125	0	20.0625	16.6875	17.125	6.9375	3.5	6.5625	1.1875
Day 8	04:00:00	9.1875	0.8125	2.5	17.375	2.25	28.5625	16.625	7.9375	6.0625	10.125	1.9375	1.75
Day 8	04:30:00	9.5	0.375	7.1875	24.0625	0	12.375	16.4375	5.8125	5.6875	7.875	4.3125	0.75
Day 8	05:00:00	5.5625	5.3125	12.5625	35.125	0	16	16.5625	2.8125	4.375	6.25	7.3125	0.0625
Day 8	05:30:00	4.3125	5.3125	8.6875	29.1875	0	18.3125	19.125	7.9375	4.5	13.75	11.375	0.1875
Day 8	06:00:00	4.8125	3.8125	16.5	30.375	0	38.5625	16.75	3.25	11.9375	22.5625	18.8125	0.0625
Day 8	06:30:00	4.9375	25.75	12.875	27.5	0	25.75	26.0625	1.6875	21.1875	19.5625	31.1875	0.4375
Day 8	07:00:00	19.4375	38.4375	20.75	25.5625	5.625	30.6875	24.75	1.0625	29.75	21.1875	31.0625	1.75
Day 8	07:30:00	26.0625	45.0625	41.5625	24	18.875	55.9375	23.4375	4.25	53.9375	22.0625	39.875	3.8125
Day 8	08:00:00	46.4375	50.625	42.5	26.75	38.4375	49.9375	34.4375	6.625	51.875	17.4375	54.1875	3.9375
Day 8	08:30:00	39.5625	58.5	34.1875	22.75	48.625	52.625	35.4375	19.375	54.3125	17.875	57.125	9.875
Day 8	09:00:00	50.5	51.5	44.8125	11.9375	51.0625	49.125	32.875	17.6875	50.75	16.3125	48.8125	16
Day 8	09:30:00	52.3125	47.25	45.375	17.0625	53.9375	50.8125	36.9375	28.0625	50.125	20.125	50.75	50.5
Day 8	10:00:00	46.625	42.125	49.125	11.9375	52.5	50.625	31.8125	37.9375	42.75	17.625	47.875	58.625
Day 8	10:30:00	53.1875	30.25	44.4375	11.25	49.25	51.0625	35.375	30.375	39.5625	14.875	50.0625	76.625
Day 8	11:00:00	53.3125	31.125	39.375	19.8125	35.25	50.0625	34.5625	38.0625	33.5	12.625	46.3125	80.5
Day 8	11:30:00	41.1875	25.75	39.6875	13.625	40.75	44.75	31.3125	37.5625	33.5	21.1875	38.125	85.375
Day 8	12:00:00	35.8125	15.5625	33.75	11.5	24	42.5	31.8125	35.8125	19.375	20	32.375	75
Day 8	12:30:00	34.1875	11.4375	25.625	15.875	10.9375	25.375	48.875	32.75	19.375	32.75	25.3125	52.25
Day 8	13:00:00	13.625	0	17.8125	2.4375	0	0.5	33.4375	25.3125	1.375	26.1875	2.625	19.5
Day 8	13:30:00	8.3125	0	3.9375	0	0	0.5625	17.5	11.4375	0.625	8.0625	1.875	10.8125
Day 8	14:00:00	12.4375	0	8.8125	0	0	0.1875	9.8125	6.5625	0.25	2.0625	2.375	3.0625
Day 8	14:30:00	7.375	0.5625	2.875	1.5	0.1875	0	3.8125	1.3125	0.375	5.0625	2.3125	11.4375
Day 8	15:00:00	7.1875	0	0.6875	1.9375	0	0	1.9375	3.875	1.6875	2.875	3.125	6.375
Day 8	15:30:00	2.9375	0	6.4375	0.1875	0	0	0.9375	5.1875	0.5625	9	2.25	5.3125
Day 8	16:00:00	3.9375	1.375	4.6875	3.25	0.875	3.3125	1.25	1.625	0.3125	4.5	0.375	6.375
Day 8	16:30:00	1.5	0	6	2.3125	0	0.3125	1.625	0.4375	1.75	4.375	2.9375	2.875
Day 8	17:00:00	5.125	1.375	3.25	9.6875	0.25	1.375	0	1.625	2.5625	3.6875	2.3125	5.3125
Day 8	17:30:00	1	1.375	2.3125	3.5625	0.3125	11.25	1.5	2.875	0.125	8.25	6.0625	4.6875
Day 8	18:00:00	0.875	0	3	12.1875	2.1875	6.375	1.25	1.0625	3.6875	8.6875	3.125	11.25
Day 8	18:30:00	1.1875	0.4375	10	2.8125	0.75	6.3125	4.3125	4.9375	7.5	15.125	8.8125	12.5
Day 8	19:00:00	1	2.375	17.9375	6.375	1.1875	12.875	3.125	4.25	3.5625	21.375	8.3125	12.25
Day 8	19:30:00	6.3125	6.4375	11.8125	8.9375	7.25	4.0625	3.5	6.4375	4.25	19.25	12	12.75
Day 8	20:00:00	8.625	9.3125	15.1875	11.9375	3.125	9.1875	12.0625	9.5	11.875	14.4375	12.6875	30.5625
Day 8	20:30:00	7.0625	13.0625	10.875	12.8125	2.1875	13.8125	28.25	22.3125	12.625	13.6875	8.25	28.375
Day 8	21:00:00	3.625	15.5	13.375	14.3125	10.5625	9.0625	24.125	12.0625	7.75	17.5	14.125	39.125
Day 8	21:30:00	4.375	5.125	15.375	6	8.125	15	20.0625	17.8125	15.125	15.0625	7.75	47.75
Day 8	22:00:00	4.9375	17.4375	17.875	5.6875	13.1875	12.5	23	25.875	10.5	13.0625	9.4375	54.5625
Day 8	22:30:00	5.25	12.4375	20.3125	2.125	7.625	18.8125	12.9375	15.4375	15.4375	13.25	10.3125	47.5625
Day 8	23:00:00	8.875	11.375	22.5625	3.8125	16.6875	18	13.375	17.5	17	17.375	9.6875	27.875
Day 8	23:30:00	12.3125	5.125	13.125	1.6875	12.6875	6.6875	13.9375	10.6875	21.125	8.1875	11.125	24.4375
Day 9	00:00:00	16.8125	7.375	17	4.25	12.5625	9.375	8.625	11.8125	11.75	11.3125	15.0625	26.6875
Day 9	00:30:00	63.6875	75.375	78.1875	43.6875	56	49.875	49.8125	102.062	55.625	57	65.875	101.75
Day 9	01:00:00	38.8125	53.5	51.0625	35	41.9375	54.8125	47.6875	42.25	40.9375	18.5	51.5625	35.125
Day 9	01:30:00	17.25	24.5625	18.5625	12.125	6.5625	32.625	28.0625	29.1875	23.9375	12	34.5625	5.625
Day 9	02:00:00	13.4375	7.9375	8.875	5.625	2.75	25.8125	18.375	29.3125	7.75	5.875	21.75	0.5625
Day 9	02:30:00	14.75	3.8125	15.25	8.25	1.125	22.5	14.125	13.3125	18.875	5.1875	6.5625	2.125
Day 9	03:00:00	8.625	5.5625	5.9375	7.625	0	24.75	15.625	14.75	6	6.125	7.5	1
Day 9	03:30:00	9.5625	3.25	5.3125	5.625	2.25	19.1875	18.5	7.125	9.9375	9.4375	10.4375	0
Day 9	04:00:00	2.5625	6.0625	3.4375	11.1875	0.125	9.125	15.375	15.6875	16.5	5.6875	2.375	0
Day 9	04:30:00	9	3.0625	0.6875	19.125	0	22.25	17.5	14	12	5.6875	3.625	0.1875
Day 9	05:00:00	10.5	2.1875	2.6875	28.625	0.125	13	12.75	11.875	1.3125	5.25	4.5625	0
Day 9	05:30:00	1.5	6.125	9.8125	25.25	0	18.8125	10.0625	3.875	3.5625	11.125	7.6875	0.0625
Day 9	06:00:00	3.3125	8.75	15.1875	24.875	0.0625	16.6875	13.75	0.125	21.6875	12.8125	9.9375	0
Day 9	06:30:00	9.125	39.9375	22.9375	22.5625	1.8125	39.5	22.875	0.6875	19.5	11.8125	19.4375	0
Day 9	07:00:00	15.0625	55.625	32.25	20.3125	15.9375	35.375	23.875	2.125	42.375	12.8125	35.125	0
Day 9	07:30:00	30	59.3125	37.9375	16.25	19.875	44.75	21	4.6875	54.5625	10.5625	45.0625	0
Day 9	08:00:00	39.1875	50.9375	32.75	20.1875	45.125	44	25.375	4.25	46.375	10.5	52	5.5625
Day 9	08:30:00	41.0625	48.8125	39.6875	17.75	40.875	50.375	25.6875	10.4375	53	12.6875	48.6875	6.3125
Day 9	09:00:00	40.9375	42.0625	43.375	17.125	48.9375	50.75	29.4375	8.9375	55.125	12.5625	51.5	10.3125
Day 9	09:30:00	45.25	38.375	46.0625	19.9375	56.5625	50	26.4375	25.125	35.8125	15.25	47.5	33.3125
Day 9	10:00:00	36.9375	28.375	45.625	18.5	46.1875	47.625	24.6875	37	44.625	11.9375	46.3125	65.625
Day 9	10:30:00	35.875	35.8125	35.75	7.8125	45.125	48.1875	26.625	42.375	36.375	12	45.1875	64.75
Day 9	11:00:00	44	29.6875	41.25	13.0625	37.5	44.6875	24.1875	29.1875	28.9375	12.3125	40	76
Day 9	11:30:00	36.875	16.75	30.8125	6.875	28.125	48.875	26.3125	32.1875	30.75	10.25	36.5625	76.5625
Day 9	12:00:00	27.8125	14.25	31.25	13.1875	22.625	40.8125	21	29.1875	18.625	10.0625	27.4375	69.0625
Day 9	12:30:00	24.25	10.4375	31.0625	10.875	8.3125	22.25	40.0625	29.75	12.75	30.8125	24.75	43.5
Day 9	13:00:00	11.5625	0	13.9375	3.5625	0	1.3125	25.1875	21.0625	0.0625	11.625	5.25	4.4375
Day 9	13:30:00	2.5	0	13.5	2.125	0	1.875	10.125	13.125	0.1875	3.75	5.5625	1.25
Day 9	14:00:00	0	2.1875	6.0625	2	0	4.5	7.25	3.875	0.5	1.1875	1.875	12
Day 9	14:30:00	0.375	0.0625	2.8125	0.9375	0	0.4375	1.6875	1.1875	0.625	3.25	1	8.75
Day 9	15:00:00	0.8125	0.1875	1.1875	0	0	1.8125	4.375	6.0625	1.0625	4.8125	1.8125	4.5625
Day 9	15:30:00	1.0625	0.75	0.125	1.375	0	0.0625	2	3.3125	0.25	5.875	1.3125	0.5
Day 9	16:00:00	3.1875	0.375	1.1875	0.9375	1.4375	0.375	3.4375	1.375	0.3125	2.625	2.625	6.125
Day 9	16:30:00	4.0625	0.875	1.4375	1.625	0	5.5625	3.0625	3.5625	3.6875	2.9375	3.625	5.875
Day 9	17:00:00	2.1875	1.5	2.375	5.625	0	0.5625	0.625	2.25	2.1875	3.1875	3.25	4.8125
Day 9	17:30:00	4.375	6.1875	6.375	1.0625	4.8125	4.5	6.75	5.5	4.25	7	2.6875	9.875
Day 9	18:00:00	4.625	0.1875	5.625	7.375	3.25	6.625	3.5	0.6875	1.0625	11.0625	5.3125	18.1875
Day 9	18:30:00	1.4375	2.0625	9.0625	12.5	1.125	10.1875	4.875	5.8125	4.3125	8.375	2.25	8.75
Day 9	19:00:00	2.375	1.5625	4.8125	14.75	4.625	15.9375	3.375	7.3125	10.625	16.875	5.125	15.75
Day 9	19:30:00	2.6875	5.375	5.125	10.25	9.4375	6.5	7.6875	4.1875	6.5625	9.25	11.375	16.625
Day 9	20:00:00	4.9375	17.5625	12.0625	12.4375	3.9375	3.3125	12	7.125	10.8125	8.6875	16.125	19.8125
Day 9	20:30:00	8.3125	7.5	20.25	4.375	4.375	5	13	9.3125	14.4375	5.8125	15.1875	23.375
Day 9	21:00:00	2.25	5.6875	14.125	8.6875	5.3125	8.375	19.9375	11.75	9.9375	6.4375	10.625	33.625
Day 9	21:30:00	1.75	18.125	9.4375	11.75	11.3125	5.3125	19.5625	14.875	9.8125	8.9375	8.5625	37.3125
Day 9	22:00:00	3	18.1875	17.5625	7.0625	6.3125	14.5	17.5625	10.8125	12.375	11.1875	12.75	34.4375
Day 9	22:30:00	7.5625	5.1875	12.375	0.3125	7.0625	15.6875	12.6875	16.4375	21.0625	8.3125	16.3125	34
Day 9	23:00:00	12.3125	4.5	6.125	3.5	8.8125	15.6875	9.9375	18.5	10.8125	6.875	7.9375	48.1875
Day 9	23:30:00	5.875	4.75	8.25	2.1875	9.3125	23.3125	9.375	17.375	10.75	5.9375	3.9375	44.6875
Day 10	00:00:00	13.5625	4.875	28.875	8.0625	12.4375	6.1875	15.625	10.875	17.875	12.25	11.625	32.8125
Day 10	00:30:00	54.9375	68.8125	79.375	47.375	57.0625	50	45.125	87.0625	47.375	38.25	63.375	90.8125
Day 10	01:00:00	42.8125	38.8125	51.3125	37.125	35.1875	57.625	37.6875	44.0625	56.125	11.75	58	33.6875
Day 10	01:30:00	17.6875	15.1875	21.875	12.5	3.875	36.125	19.1875	20.3125	25.9375	6.8125	25.875	9.8125
Day 10	02:00:00	15.9375	9.375	16.0625	10.4375	1.5625	27.3125	13.3125	27.6875	17.8125	4.3125	15.0625	0.6875
Day 10	02:30:00	12.75	10.6875	18.125	8.0625	4.5	22	12.1875	20.125	13.125	5.9375	11.375	2.125
Day 10	03:00:00	9.3125	7.25	9.6875	4.75	1.8125	23.25	11.1875	19.3125	3.125	2.6875	10.125	4
Day 10	03:30:00	8.3125	1.9375	5.75	4.8125	2.5	17.5625	11.25	15.0625	14.8125	1	3	2.75
Day 10	04:00:00	10.125	6.4375	3.1875	9.1875	0	14.1875	11.9375	13.5	9.1875	3.0625	2.5625	0
Day 10	04:30:00	11.1875	0.25	0.125	21.875	0.8125	10.6875	9.1875	9	5.5625	1.625	1.6875	0
Day 10	05:00:00	7.0625	1.625	1.875	22.0625	3.625	24.5625	13.625	4	3.4375	1.9375	3.6875	0.1875
Day 10	05:30:00	1.8125	9.6875	11.375	26.5625	0	7.8125	12.5625	0.9375	9.625	3.75	1.5625	0
Day 10	06:00:00	7.875	12.75	11.125	26.375	2.8125	21.9375	9.0625	0.3125	7.875	9.5625	1.375	0
Day 10	06:30:00	8.25	25.125	23.8125	20.75	0	28.0625	13.625	0.0625	13.5	9.3125	6.9375	0
Day 10	07:00:00	19.5625	42.8125	24.4375	27.125	5.125	40.5625	15.375	1.4375	58.625	5.3125	28.8125	0
Day 10	07:30:00	27.625	55.8125	46.1875	18.8125	41.6875	38.25	15.4375	0.0625	54	7.0625	37.5	0
Day 10	08:00:00	29.4375	38.5625	34.5	21.6875	37.125	51.5625	18	0.25	51.8125	4.1875	47.625	0
Day 10	08:30:00	37.25	45.625	41.8125	14.6875	40.375	47.75	21.875	1.9375	40.8125	7.4375	45.1875	5.3125
Day 10	09:00:00	38.5625	30.4375	40.4375	18.5625	45.375	52.5625	20.9375	3	51.875	6.5	53.5625	7.625
Day 10	09:30:00	33.625	37.0625	43.1875	17.9375	44.6875	49.125	20.375	18.0625	30.25	6.0625	46.8125	25.5
Day 10	10:00:00	40.4375	30.25	44.6875	12.625	44.4375	43.625	17.8125	31.375	37.375	7.75	38.875	43.75
Day 10	10:30:00	40.4375	27.3125	41.25	14.375	39.75	45.5	17.6875	28	37.8125	4.75	35.875	57.875
Day 10	11:00:00	36.0625	29.625	36.1875	12.9375	29.9375	45.125	17	27.875	29.6875	7	32.0625	67.125
Day 10	11:30:00	32.125	19.625	43	10.0625	31.9375	43.375	16.875	27.4375	28.9375	5.25	27.75	65.375
Day 10	12:00:00	22.6875	14.1875	28.4375	9.375	16.5625	35.6875	19.9375	22.8125	15.125	5.5625	27.1875	58.75
Day 10	12:30:00	33.8125	5.6875	30.3125	10.9375	10.5	23.875	29.4375	30	15.6875	15.625	29.9375	51.25
Day 10	13:00:00	23.3125	0	18.875	4.1875	0.0625	0.875	20.6875	17.625	0	7.8125	13.6875	20.1875
Day 10	13:30:00	14.8125	0	5.75	4.6875	0	0.3125	8	17.3125	0.375	5.6875	5.4375	16.5625
Day 10	14:00:00	4.875	0	1.0625	0.8125	0.5625	0	3.5	3.3125	0.625	3.0625	2.3125	5.6875
Day 10	14:30:00	2.875	0.9375	4.0625	0	0.0625	0.5	2.375	0.6875	1.5625	2.125	2.375	1.625
Day 10	15:00:00	1.0625	0	1.3125	0	0.4375	0	0.25	0	4.4375	3.3125	1.8125	1.8125
Day 10	15:30:00	0.0625	0.1875	0.125	3.1875	0	0	1.625	1.0625	0.4375	5.25	0.375	5
Day 10	16:00:00	2.5625	0.625	2.9375	2.375	0.3125	0.0625	1.1875	0.375	0	4.4375	0.75	2.25
Day 10	16:30:00	2.125	1.0625	0.8125	3.375	0.25	0.3125	0	1	3.125	3.625	0.25	6.9375
Day 10	17:00:00	1.75	1.25	8.125	1.0625	0.125	2	3.375	2.3125	0	3.25	3.1875	5.5
Day 10	17:30:00	1.6875	1.125	8.25	1.4375	0	1.9375	2.5625	7.5	2	3.9375	3.3125	5.0625
Day 10	18:00:00	0.875	1.75	4.0625	8.25	0.6875	10.3125	4	5.5625	3.125	6.9375	3.9375	5.75
Day 10	18:30:00	4	0.5625	6.4375	6.125	1.9375	13.0625	4.9375	3.5625	10.25	10.3125	5.0625	6.0625
Day 10	19:00:00	3.6875	2.4375	7.3125	9.25	1.75	9.5	8.9375	0.875	6.8125	8.0625	3	8.3125
Day 10	19:30:00	4.3125	6.875	13.9375	7.75	2.5	4.5	11.625	3.5	4.375	7.3125	4.5	14.5
Day 10	20:00:00	3.4375	5.875	9.5	11	3.125	10.6875	12.4375	5	5.625	9.75	12.125	11.6875
Day 10	20:30:00	0	7.9375	10.25	9.25	3.375	13.625	14.875	5.625	8	4.625	16.5	11.0625
Day 10	21:00:00	0.8125	10.625	19.9375	2.5625	8.5625	7.6875	10.3125	11.375	9.875	5.1875	19.4375	27.5
Day 10	21:30:00	3.8125	9.75	12.1875	5.1875	14.625	8.9375	7.5625	12.9375	12.3125	6.3125	15.375	42.5625
Day 10	22:00:00	0.5	10.875	11.5	4.75	10.5	17.6875	9.0625	17.625	18.6875	5.1875	11.875	31.75
Day 10	22:30:00	3.75	12.8125	22.1875	5.5	8.1875	13.625	8.75	18.1875	10.125	6.8125	4.25	40.6875
Day 10	23:00:00	11.0625	6.625	10.5	2.4375	12.25	13.3125	9.375	15.5	10.25	2.125	8	31.8125
Day 10	23:30:00	17.25	6	9.9375	3.6875	6.25	17.75	12.125	16.125	12.25	4	10.0625	24.0625

## Sheet: Experiment 4
		TD2/+	larpRNAiGD/+	TD2/Rbp9RNAiKK	PsiRNAiGD/+	w1118	TD2/PsiRNAiGD	VIE260B/+	Rbp9RNAiKK/+	PsiRNAi(KK)/+	TD2/VIE260B	TD2/PsiRNAiKK	TD2/larpRNAiGD
Day 7	00:00:00	11.9375	19.875	15.4375	0.75	30.2	8.125	12.4375	7.6875	4.9375	8	12.6875	17.7692
Day 7	00:30:00	82.75	75.875	61.9375	104	75.5333	66.4375	69	62.75	92.125	70.0625	72.8125	50.6154
Day 7	01:00:00	43.375	43	54.125	32.75	37.4	21.6875	26.125	36.875	28.25	33.9375	24	35.5385
Day 7	01:30:00	26.6875	24.375	27.8125	15.625	15.8667	17.75	6.375	9.75	6.125	19.5	3.8125	20.2308
Day 7	02:00:00	23.5625	11.625	16.4375	13.8125	15.6667	8.6875	2.0625	8.4375	14.875	7.75	13.3125	17.3846
Day 7	02:30:00	31.8125	13.6875	21.625	17.5625	12.8	8.1875	5.25	9.3125	6.6875	11.5625	13.125	15.6154
Day 7	03:00:00	8	8.625	16.875	7.4375	5.66667	23.25	3.875	1.8125	8.4375	16.25	20.125	17.5385
Day 7	03:30:00	7.0625	10.3125	18.3125	6.6875	8.33333	30.25	4.875	3.125	9.3125	5.5625	26	14.9231
Day 7	04:00:00	11.25	12.1875	19	26.75	2.86667	49	2.75	7.75	11.1875	3.5625	38.8125	14.7692
Day 7	04:30:00	19.25	12	13.9375	21.875	1.53333	38.0625	1.3125	7.375	16.6875	7.9375	38.5	18.9231
Day 7	05:00:00	17.125	21.1875	19.5	31.625	1.46667	27.25	12.3125	3.5625	15.4375	11.625	35.9375	15
Day 7	05:30:00	24.6875	28.625	19.25	30.4375	2.46667	43.875	17.0625	6.5625	20.75	8.4375	37	14.6923
Day 7	06:00:00	25.5625	37.875	14.3125	44.25	10.4	31.0625	31.8125	11.375	23.5625	7.875	41.1875	17.7692
Day 7	06:30:00	33.875	53.4375	26.3125	59.125	14.2667	39.0625	42.8125	20.75	32.1875	28.9375	34.25	10.4615
Day 7	07:00:00	46.5625	52.9375	39.125	52.625	21.4667	34.0625	58.9375	29.9375	38.4375	30.625	38.6875	30.6923
Day 7	07:30:00	35.5	57.375	38.4375	57.375	50.8667	34.9375	61.125	47.5	44.1875	35.4375	30.3125	30.3077
Day 7	08:00:00	46.1875	70.5	42.875	48.5	56.2	34.375	69.25	45.75	55.875	41.625	33.4375	30.4615
Day 7	08:30:00	47.5	65.9375	53.375	44.375	75.6	36.9375	70.25	44.3125	67.375	39.0625	29.9375	28.8462
Day 7	09:00:00	51.3125	67.3125	41.5	45.875	80.6667	37.75	75.4375	55.5625	58.1875	44.25	10.5	25.1538
Day 7	09:30:00	43.875	67.625	46.625	52.625	75.5333	35.75	75.5625	57	56.875	47.0625	17.4375	20.3846
Day 7	10:00:00	56.3125	61.875	58.625	40.9375	72.0667	28.625	73.375	50.9375	53	43.3125	20.1875	30.1538
Day 7	10:30:00	47.5	56.5625	52.5	40.125	75.2	27.9375	62.0625	45.3125	50.0625	47.9375	16.875	23.8462
Day 7	11:00:00	57.4375	51.6875	51.8125	40.3125	68.7333	27.5	53.5	44.625	37.8125	41.5	17.3125	24.7692
Day 7	11:30:00	44.4375	58.625	46.375	37.8125	68	20.5	46.1875	34.25	31.75	38.5	15.375	23.9231
Day 7	12:00:00	44.8125	40	41.9375	32.625	50.5333	16.3125	36.5	37.25	28.1875	34.625	28.25	25.7692
Day 7	12:30:00	37.25	14.75	27.3125	6.125	20.6667	54.8125	18.125	9.75	4.75	31.875	8.25	47.9231
Day 7	13:00:00	13.1875	8.875	0.0625	0	3.53333	10.75	0.4375	0.0625	0.0625	3.125	3.5	28
Day 7	13:30:00	0	5.125	0	0.3125	6.93333	8.375	0.0625	0.6875	0.0625	0	0.6875	10.3077
Day 7	14:00:00	0	1.8125	0.3125	0.25	1.46667	1.8125	0.375	0.0625	0	0	0	4.30769
Day 7	14:30:00	0.8125	2.125	2	0	1.33333	0	0.9375	0.0625	0	0	0	9.07692
Day 7	15:00:00	5.6875	3.75	2	0	1.93333	0	3.75	0.875	0.0625	0	0	1.84615
Day 7	15:30:00	0.25	0.6875	0	0	7.6	0	2	0.5	0	0	0	3.76923
Day 7	16:00:00	1.8125	10.25	3.1875	2.8125	3.66667	3	4.4375	0	0.0625	0	0	2.76923
Day 7	16:30:00	0.75	11.1875	4.875	0.8125	5.86667	3.625	1.3125	1.125	0.0625	0	11.25	0.846154
Day 7	17:00:00	2.25	2.25	1.9375	3.9375	3.73333	2.5625	2.9375	0.5	0.875	0.6875	13.1875	4.23077
Day 7	17:30:00	12.1875	4.3125	2.875	3.875	9.13333	3.4375	0.8125	0.6875	1.4375	0	11.75	2.92308
Day 7	18:00:00	15.9375	3.875	8.125	6.8125	12.4667	5.25	1.1875	1.6875	1.1875	0.0625	12.5	2.07692
Day 7	18:30:00	8.6875	7.75	14.625	8.9375	13.2	7.6875	2.125	3.75	3.875	0.375	16.875	9.23077
Day 7	19:00:00	7.9375	12.625	1.9375	3.0625	7.86667	10.4375	4.5625	0.9375	4.0625	1.5	12.3125	8.07692
Day 7	19:30:00	12.6875	10.375	12	3.3125	17.0667	11.5625	0.875	8.6875	2	4.0625	14.0625	10.8462
Day 7	20:00:00	21.0625	18.6875	11.0625	7.0625	24.8667	15.4375	6.5	1.5625	12.25	7	16.375	19.3077
Day 7	20:30:00	18.1875	15.1875	16.1875	10.3125	29.7333	10.75	18.4375	0.8125	6.3125	5.25	17.625	17.6923
Day 7	21:00:00	18.6875	18.3125	8.6875	4.9375	38.2667	13.25	13.875	10.8125	3.4375	10.6875	11.6875	17.2308
Day 7	21:30:00	12.3125	7.4375	12.625	4.25	33.4	7.875	16.5	7.25	6.8125	5.125	3.75	13.8462
Day 7	22:00:00	15.3125	11.0625	19.5	9.6875	22.0667	3	24.625	21.9375	4.625	5.3125	0.625	10.8462
Day 7	22:30:00	24.1875	16	13.25	15.3125	29.2	2	18	10.1875	3.8125	0.625	2.875	7.53846
Day 7	23:00:00	20.9375	12.625	11.0625	9.875	36.9333	12.5	12	11	15.625	7.0625	10.875	13.5385
Day 7	23:30:00	18.3125	16.25	19.5625	10	22.4667	13.6875	10.875	5.25	7.5	9.8125	7.4375	12.7692
Day 8	00:00:00	19.8125	12.4375	10.0625	10.875	20.6	17.9375	13.8125	11.0625	11.1875	9.125	9.875	9.15385
Day 8	00:30:00	67.25	75.75	57.125	93.125	88.6667	57.5	79.5625	68.1875	84.6875	68.5625	66.5	49
Day 8	01:00:00	38.75	46.6875	39.25	22.6875	44.6	27.4375	24.375	31.6875	28.9375	39.5625	20.9375	30.6154
Day 8	01:30:00	22.25	12.625	21	13.875	11.6667	20.375	7.75	12.3125	12.8125	16.6875	6.8125	15.8462
Day 8	02:00:00	28	12.3125	20.125	12.75	10.4	12.4375	3.8125	7	10.5	8.5	5.4375	13.1538
Day 8	02:30:00	13.25	2.5625	17.6875	11.0625	4.53333	13.375	0.9375	4.8125	6.375	8.125	17.9375	12.2308
Day 8	03:00:00	20.125	9.5625	20.875	9.4375	4.2	24	3.5	2.25	3.8125	5.0625	30.625	10.3077
Day 8	03:30:00	17.375	9.3125	19.375	13.0625	0.733333	36.0625	4.875	1.0625	8.25	9	31.4375	7.15385
Day 8	04:00:00	9.6875	15.9375	11.375	16.75	3.6	31.5625	2.25	2.5	11.25	2.4375	41.9375	14.2308
Day 8	04:30:00	16.8125	10.8125	19.9375	18.9375	0.133333	26.875	12.5625	2.375	13.0625	3.8125	29.9375	13.7692
Day 8	05:00:00	14.8125	13.8125	12.8125	26.25	0.2	32.1875	9.875	6.875	12.875	7.9375	41.5	8.76923
Day 8	05:30:00	18.875	35.5	17.125	25.6875	1.66667	33.0625	22	11.25	26.5	17.25	38.375	13.3846
Day 8	06:00:00	36.8125	34.6875	25.375	42.5	6.46667	29.0625	36.5625	11.25	38.25	12.8125	35.1875	11
Day 8	06:30:00	28	34.625	25.875	42.125	8.13333	35.75	49.3125	23.625	38.3125	23.5625	36.0625	18.9231
Day 8	07:00:00	44.3125	51.375	27.125	60	27.9333	36.6875	71.9375	40.9375	46.5	23.0625	30.3125	25.2308
Day 8	07:30:00	44.5	63.5	42.1875	54.3125	51.0667	34.3125	65.0625	48.5	58.3125	36.375	33.5625	24.2308
Day 8	08:00:00	48.8125	70.0625	43.3125	42.75	66.0667	31.3125	66.875	42	63	48.125	29.75	22.2308
Day 8	08:30:00	52.8125	70.5	45.375	52.125	65.7333	26.375	75.5	48.3125	55.8125	36.375	24.5	28.6154
Day 8	09:00:00	48.3125	75.25	49.6875	44.5625	70.9333	26.25	76.4375	45.6875	56.5	42.5	26.0625	21.1538
Day 8	09:30:00	38.125	61.75	56	41.75	70.5333	19.6875	74.1875	47.1875	58	43.4375	19.5625	22.7692
Day 8	10:00:00	44.375	66.4375	44.875	38.3125	67.4	20.375	64.8125	39.5625	49.75	46.375	15.25	23.7692
Day 8	10:30:00	46.5625	59.0625	43.1875	45.6875	67.6	21.25	56.5	35.9375	43.25	43.875	18.5625	22.5385
Day 8	11:00:00	44.3125	52.8125	52.75	35.1875	62.4667	21.5625	46	33.25	37.3125	40.9375	6.75	18.0769
Day 8	11:30:00	43.8125	42.6875	43	34.75	46.8667	17.1875	39.125	29.1875	37.9375	32.875	8.875	21.9231
Day 8	12:00:00	44.375	52.5625	43.125	31.1875	38.6667	22.625	35.75	21.125	20.3125	24.5625	18.3125	19.8462
Day 8	12:30:00	38.8125	28.25	27.9375	8.8125	12.5333	49.875	8.6875	7.625	4.75	23.3125	18.4375	43.3077
Day 8	13:00:00	6.875	2.875	1.4375	1.125	2.73333	17.8125	0.125	0	0.125	1.5	2.5	15.3846
Day 8	13:30:00	0.25	0.1875	0.0625	0.1875	3.06667	6.125	0	0.1875	0.3125	0	1.5625	8.76923
Day 8	14:00:00	3.625	3.6875	0	0.375	1.8	1.25	0.1875	1.75	0.625	0	1.5	5.15385
Day 8	14:30:00	6.875	3.125	0	0	0	1	0.0625	0	0.3125	1.6875	0	3.69231
Day 8	15:00:00	4.375	1.6875	0.75	0.0625	1	1.5625	0	0	0.9375	0.0625	1.625	0.230769
Day 8	15:30:00	1.375	0.8125	4.5625	1.375	6.13333	0.125	1	0.0625	5	2.4375	2.6875	4.15385
Day 8	16:00:00	5.3125	0.75	0.5	5.4375	2.73333	6.625	0.6875	1.75	1.3125	1.1875	2	0.923077
Day 8	16:30:00	7.5	0.25	2.125	1.0625	1.53333	6.1875	0.125	0.125	2.5	1.4375	3.0625	1.53846
Day 8	17:00:00	6.9375	1.5	3.1875	3.875	4.06667	9.125	2.75	0.0625	0.75	1.5	5.0625	9.46154
Day 8	17:30:00	13.125	10	1.0625	9.3125	6.2	11.25	2.6875	1.375	1.75	6.1875	8.1875	4.76923
Day 8	18:00:00	7.75	6.625	11.9375	1.9375	16.3333	19.375	0.375	1.375	1.625	0	14.6875	4.53846
Day 8	18:30:00	11.4375	11.8125	16.125	0.625	12.1333	13.4375	2.125	1.375	4.125	1.1875	18.125	9.46154
Day 8	19:00:00	10.5625	10	5.6875	7.9375	10.1333	11.4375	4.25	8.4375	1.625	1.25	13.375	9.15385
Day 8	19:30:00	21.5625	10.5	14.125	8.8125	9.2	14.625	11.1875	6.6875	2.5625	7.5	6.6875	10.7692
Day 8	20:00:00	17.6875	13.1875	10.8125	4.0625	7.13333	7.4375	9.375	2.9375	6.8125	3.6875	9.6875	10.9231
Day 8	20:30:00	15.0625	16.3125	6.9375	3.875	23.8667	11.375	10.0625	8.75	2.375	5.6875	14.1875	10.5385
Day 8	21:00:00	11.5625	24.75	16.875	15.125	29.2667	15.375	13.8125	7	6.8125	1.9375	8.5625	11
Day 8	21:30:00	15.6875	16.6875	10.5625	28.9375	37.8	8.25	22.125	7.1875	5.625	10.9375	8.75	7.69231
Day 8	22:00:00	11.375	8.25	8.3125	16.25	36.6667	7.875	16.0625	16.1875	6	4.75	8.25	8.30769
Day 8	22:30:00	19	7.0625	19	11.625	25.6667	12.3125	18.375	10.375	6.0625	15.75	8.625	10.9231
Day 8	23:00:00	20.875	9.5	12.5625	9.875	21.0667	14.875	13.0625	11.8125	2.1875	6.8125	9.625	13.5385
Day 8	23:30:00	11.5	5.3125	26.75	10.3125	15.0667	19.4375	6.6875	6.5625	8.5625	7.75	6.75	7.23077
Day 9	00:00:00	10.75	6.1875	16.625	7.375	22.4	21.6875	16.875	12.6875	13.125	19.8125	9.0625	9.30769
Day 9	00:30:00	69.75	81.0625	51.3125	97.5625	74.2667	53.9375	71.1875	71.3125	80.125	67.125	57.5625	44.4615
Day 9	01:00:00	37.0625	50.1875	33.8125	20.625	32.6667	23.75	19.375	39.6875	25.1875	37.75	23.5	25.8462
Day 9	01:30:00	15.25	17	23.75	7.125	16.4	11.25	7.125	14.5	11.5625	16.25	10.5	15.6923
Day 9	02:00:00	15.4375	7.625	24.9375	6.9375	6.66667	10.1875	4.4375	4.4375	6	15.375	13.9375	7.07692
Day 9	02:30:00	18.8125	3.125	18.5625	4.625	4	12	2.4375	6.625	8.375	10	14.375	8.38462
Day 9	03:00:00	12	1.1875	18.8125	2.6875	3.66667	16.6875	2.0625	2.6875	1.625	10.6875	23.625	6.38462
Day 9	03:30:00	12.5625	8.5625	14.9375	11.125	3.26667	17.5	3.5625	4.25	10.1875	5.5	34.3125	12.5385
Day 9	04:00:00	9.875	4.75	17.125	16.8125	2.33333	34.5625	1.125	1.375	13	7.25	28.6875	9.76923
Day 9	04:30:00	10	7.5625	18.25	18.9375	1.2	34.3125	10.3125	3.8125	12.125	7.25	31.6875	14.7692
Day 9	05:00:00	15.4375	10.3125	15.25	14	1.26667	27.6875	21.25	5.8125	14.8125	7.75	26.4375	10.6154
Day 9	05:30:00	18.0625	20.8125	19.625	18.1875	0.6	29.3125	36.25	5.8125	30.9375	8.375	30.4375	7.38462
Day 9	06:00:00	20	30.625	25.625	35.5625	3.86667	20.5625	34.75	14.5625	20.75	17.6875	26.75	12.3077
Day 9	06:30:00	41.8125	53.9375	22.1875	57.4375	11.5333	22.8125	48.3125	25.6875	36.9375	18.9375	29	16.5385
Day 9	07:00:00	43.8125	64.6875	35.4375	56.4375	17.8	26.25	62.875	49.5	55.4375	33.9375	30.6875	16.9231
Day 9	07:30:00	44.6875	68.25	39.0625	47.8125	40.5333	29.1875	64.5	50.875	52.8125	34.0625	21.6875	13.6923
Day 9	08:00:00	39.4375	64.5625	47.0625	47	66.8	26	77.0625	43.1875	59.0625	42.5625	23.3125	13
Day 9	08:30:00	52.375	68.5	54	38.8125	67.7333	26.5	69.25	49.5	55.625	36.1875	21.625	15.7692
Day 9	09:00:00	47.125	61.1875	50.375	38.25	60.7333	16.5	68.1875	45.375	47.0625	44.75	22.625	15.3077
Day 9	09:30:00	41.625	56.375	46.5	46.9375	58.6	20.125	72.1875	46.625	40.375	37	18	17
Day 9	10:00:00	41.25	48	42.5625	33.375	59.2667	15.875	62.9375	33.5	39.5	38.4375	11.5625	14.3846
Day 9	10:30:00	42.875	50.625	44	32.9375	57.8667	24.5625	48.5625	30.875	35.0625	38.0625	12.5625	14.1538
Day 9	11:00:00	41.75	46.25	45.1875	32	46.2667	14.0625	45.375	34.25	31.5625	32.9375	13.9375	15.8462
Day 9	11:30:00	42.9375	50	44.3125	29.625	39.6	17.0625	37.5	26.25	17.625	28.4375	19.0625	15
Day 9	12:00:00	48.125	36.875	23.0625	30.9375	28.8667	14.5	31.5625	28.5625	18.6875	21.9375	9.375	10.9231
Day 9	12:30:00	34.6875	26.375	31.375	18.6875	19.1333	44.75	3.8125	4.625	3.5	29.5625	18.9375	33.2308
Day 9	13:00:00	10.625	13.6875	3.1875	2.6875	9.8	17.4375	0.25	1	0	11.9375	6.0625	14.2308
Day 9	13:30:00	4.4375	3.375	0.3125	1.9375	5.33333	8.9375	0.25	0	0	0.125	0.375	6.38462
Day 9	14:00:00	1.5	3.0625	0.75	0.875	0.533333	5.5	0	0.8125	0.625	0	0	4.46154
Day 9	14:30:00	0	1.375	0.0625	0.75	1.66667	9.5625	0.0625	1.4375	1.4375	0	0	1.30769
Day 9	15:00:00	1.0625	4	0.1875	0.5625	4.06667	4.875	0	0	0.0625	0.25	0.0625	0.0769231
Day 9	15:30:00	4.25	3.1875	0.1875	0.375	2.46667	9.6875	0	1.1875	0.25	1.75	0.75	0.846154
Day 9	16:00:00	0.25	1.8125	1.25	0.0625	0.733333	6.3125	0.0625	0.125	0.3125	0.0625	0.5625	0
Day 9	16:30:00	0.125	2.375	6.375	1.0625	5.26667	9.125	0.375	0.5	1.0625	0.5625	3.625	0.230769
Day 9	17:00:00	0.625	2.6875	6.0625	2.5	9.26667	10.1875	0	0.3125	4.4375	2.375	5.125	3.07692
Day 9	17:30:00	9.1875	5.875	4.375	2.4375	4.53333	12.5625	0.0625	0.875	2.5625	1.875	6.4375	2.84615
Day 9	18:00:00	7.0625	3.625	5.625	3.6875	4.93333	8.3125	0.25	0.5	0.4375	0.1875	17	2.53846
Day 9	18:30:00	14.4375	3	16.5	5.125	11.2	13.4375	1.4375	1.75	1	4	10.3125	0.615385
Day 9	19:00:00	12.5625	6.375	3.9375	4.5	18.4667	13.375	1.5625	8.5	4.5625	1.3125	16.6875	9.23077
Day 9	19:30:00	8.3125	16	8.8125	10.875	11.4	13.4375	5.875	4.5625	4.3125	9.25	9	8
Day 9	20:00:00	10.5	12.125	14.9375	4.5	14.5333	11.875	6.125	1.9375	2.75	2.625	2.6875	4.53846
Day 9	20:30:00	10.3125	18.6875	18.3125	4.625	22.5333	8.875	14.8125	8.5625	2.3125	3.8125	7.75	12.2308
Day 9	21:00:00	20.625	11.75	16.0625	11.3125	26.6667	4.5	15.125	7.875	4	0.5625	15.25	13.3077
Day 9	21:30:00	15	12.8125	5.5	3.375	31.2667	7.25	6.0625	12.5	4.75	5.3125	9.625	4.07692
Day 9	22:00:00	20.1875	13.875	12.75	10	24.2	3.9375	6.125	4.5	8.875	5.75	7.8125	3.30769
Day 9	22:30:00	17.625	5.9375	16.1875	9.125	26.1333	13.9375	15.4375	5.6875	7.9375	4.75	8.9375	6.84615
Day 9	23:00:00	15.875	9.9375	19.375	5.1875	21.1333	6.5	20.75	9.0625	2.5	9.125	11.75	7.53846
Day 9	23:30:00	16	13.8125	11.75	3.9375	21.7333	13.5	6.1875	8.75	6.0625	7.75	12.625	9.15385
Day 10	00:00:00	17.9375	6.8125	13.5625	6.875	13.3333	17.4375	11.0625	14.9375	7.5	16.125	14.375	4
Day 10	00:30:00	68.25	78.75	56.1875	80.375	66.8	53.8125	65.8125	70.875	88.75	67.8125	43.6875	27.3077
Day 10	01:00:00	44.0625	36.1875	37.5625	14.625	23.8	26	15.875	42.75	28.5625	29.625	23	17.4615
Day 10	01:30:00	16.5625	14.25	19.75	6.4375	8.8	13.125	8	13.125	8.875	13.125	15.9375	10.2308
Day 10	02:00:00	16.5625	5.375	20.375	4.875	5	8.375	4.75	5.375	6.625	9.25	11.6875	8.76923
Day 10	02:30:00	15.3125	9.25	12.5625	7.375	5.33333	7.5625	2.5625	6.1875	5	12	16.1875	9.15385
Day 10	03:00:00	11.25	9.375	15.6875	8.3125	3.26667	9	1.3125	9.9375	3.9375	7.3125	16.6875	7.84615
Day 10	03:30:00	9.25	1.375	16.5	1.3125	2.6	23.5	0.125	2	6.9375	7.9375	27.8125	3.15385
Day 10	04:00:00	12.1875	3.0625	21.125	9.125	3.13333	30.5625	3.1875	3.9375	19.9375	5.25	27.8125	5.38462
Day 10	04:30:00	6.6875	4.25	12	12.6875	1.73333	29.5	7.1875	4.375	20.4375	5.5625	27.8125	6.76923
Day 10	05:00:00	15.625	6.5	19.1875	8.1875	1.13333	21.5	23.8125	6.4375	21.375	5.1875	33	9.92308
Day 10	05:30:00	18.375	2.625	19.5625	25.375	0.866667	20.1875	37.3125	17.0625	25.375	10.1875	35.875	6.46154
Day 10	06:00:00	35.6875	39.375	31.875	28.6875	1	19.4375	48.6875	13.1875	41.5	12.625	32.1875	13.3077
Day 10	06:30:00	33.1875	57.4375	29	49.0625	5.33333	23.4375	52.8125	36.3125	57	33.6875	26.75	12.1538
Day 10	07:00:00	39.875	70.25	33.75	50.25	16.1333	21.625	62.875	43.125	56.75	29.3125	25.0625	11
Day 10	07:30:00	37.3125	69.125	40.25	44.125	46.7333	26.375	67.375	44.25	56.6875	30.625	18.0625	11.1538
Day 10	08:00:00	38.5625	60.6875	46	37.9375	51.5333	23.75	64.125	47.375	59.3125	37.375	21.375	11.9231
Day 10	08:30:00	46.125	65	37.75	48.8125	52.9333	19.3125	70.25	48.3125	48.125	39.375	21.4375	13.9231
Day 10	09:00:00	48.375	60.875	47.875	40.5625	59.2	25.5	64.1875	40.375	50.6875	40.9375	12.4375	15.9231
Day 10	09:30:00	39.9375	55.0625	44.5625	31	57.7333	24.8125	53.625	39.8125	39	41.6875	17.75	12.4615
Day 10	10:00:00	44.0625	43.3125	41.3125	31.6875	54.2	17.5625	48.0625	38.9375	39.625	44.5625	15.3125	5.46154
Day 10	10:30:00	43.125	43.5625	43.5	37.75	45.5333	14.9375	48.5	29.6875	33.75	34.3125	19.0625	7.30769
Day 10	11:00:00	38.375	42.9375	35.9375	25.0625	39.5333	14.5	37.25	31.6875	32.375	31.3125	10.3125	9.69231
Day 10	11:30:00	40.1875	43.625	36.125	27.75	32	12.125	28.875	23.6875	31.5	23.625	12.5625	13.2308
Day 10	12:00:00	40.5	37.3125	37.1875	19.25	26.8	14.5625	28.5625	20.4375	19	21.4375	7.375	10.9231
Day 10	12:30:00	41.0625	25.1875	34.0625	14.3125	17.1333	43.3125	6.75	8.5625	5.0625	18.75	15.3125	23
Day 10	13:00:00	21.5	3.75	2.375	6.6875	3.33333	15.8125	0.5	0	0	7.3125	6.25	4.46154
Day 10	13:30:00	4.5	0.5625	0	0.125	2.33333	3.3125	0.0625	0	0	6.625	2.5625	1.76923
Day 10	14:00:00	8	0.125	0	4.0625	0.533333	3.125	0.0625	0	0	4	2.5625	0
Day 10	14:30:00	0.0625	0.8125	0.3125	0	1.26667	0.8125	0.3125	0	0	1.4375	0.5	3.53846
Day 10	15:00:00	5	1.1875	0.0625	0	2.46667	2.5625	1.25	0	0	0.875	0.5	1.92308
Day 10	15:30:00	5.875	1	2.25	0.5	1.86667	2.9375	0.3125	0.375	0.25	0.6875	0.5625	0
Day 10	16:00:00	4.125	0.8125	3.75	0.5625	4.8	5.9375	1.6875	0	0	3.4375	1.25	1.30769
Day 10	16:30:00	0.0625	1.0625	3.375	1	8.06667	11	3.3125	0	0	0	0.6875	1.84615
Day 10	17:00:00	4.25	3.125	1.75	0.125	6.13333	8.8125	0.375	0	0.5	0	9.4375	0
Day 10	17:30:00	8.875	5.6875	5.6875	1.8125	3.33333	14.1875	7.1875	0.875	0.5625	0	8.1875	0.153846
Day 10	18:00:00	7.3125	7.4375	10.4375	8.875	14.1333	8.3125	0.625	2.3125	0	0.0625	14.125	2.53846
Day 10	18:30:00	9.3125	8	9.3125	2.1875	4.33333	10.0625	1.4375	0.875	1.625	0.125	6.0625	6.46154
Day 10	19:00:00	18.875	13.875	12.3125	0.4375	18.8667	11.875	6.1875	2.0625	2.3125	2.25	7.5	5.23077
Day 10	19:30:00	9.6875	10.25	12.125	3.375	17.3333	18	2.5625	4.6875	4.3125	10.5	7.4375	4.53846
Day 10	20:00:00	11.3125	19	7.75	3.0625	19.9333	11.75	12	8.1875	3.1875	3.9375	13.9375	5.15385
Day 10	20:30:00	11.9375	13.9375	8.375	4.1875	25.6667	9.5625	7.875	14.3125	3.5625	2.5625	7.4375	11.2308
Day 10	21:00:00	11.375	15.8125	10	13	24.7333	4.125	13	16.25	2.4375	1.1875	8.5625	9.07692
Day 10	21:30:00	13.5625	6	10.75	2.25	38.7333	5.625	11	11.9375	8.25	3.4375	1.5625	8.76923
Day 10	22:00:00	27.125	12.4375	20.625	2.8125	15.5333	1.8125	14.4375	12.375	8.9375	10.25	4.0625	5.61538
Day 10	22:30:00	19.5	11.625	6.6875	13.125	12.8667	6.6875	19.125	2.625	4.0625	2.6875	5.9375	3
Day 10	23:00:00	16.8125	15.25	13.125	5.9375	17.6667	5.25	13.3125	11.3125	3.375	6.0625	6.8125	2.15385
Day 10	23:30:00	16.0625	16.0625	10.5	10.125	16.2	7	10.8125	7.8125	3.125	9.9375	13.1875	3.53846

## Sheet: Experiment 5
		TD2/VIE260B	Rbp9RNAiKK/+	larpRNAiGD/+	TD2/PsiRNAiGD	TD2/larpRNAiGD	TD2/PsiRNAiKK	VIE260B/+	TD2/Rbp9RNAiKK	TD2/+	w1118
Day 7	00:00:00	3.33333	10.1875	5.78571	18.0667	7.53846	8.3125	7.8125	6.875	12.125	31.3125
Day 7	00:30:00	43.7333	46.6875	62.9286	37.0667	52.5385	44.875	50.9375	47.0625	70.8125	91.875
Day 7	01:00:00	26	54.5	51.0714	26.6667	47.2308	30.75	20.6875	66.875	49.9375	59.0625
Day 7	01:30:00	7	13	13.1429	12.7333	28.8462	5.1875	4.5625	24.9375	27	27.0625
Day 7	02:00:00	7.93333	11.125	10.7143	20.2	19	6.875	0.1875	11.6875	25.875	9.25
Day 7	02:30:00	8.06667	3.8125	12.0714	18.2667	21.3846	15.4375	0	16	21.6875	14.625
Day 7	03:00:00	6.93333	4.9375	7	16.7333	16.8462	29.625	1	17.3125	13.3125	7.5625
Day 7	03:30:00	9.06667	7.6875	2.21429	27.8667	19.1538	27.875	0	19.375	26.25	4.625
Day 7	04:00:00	3.26667	4.5	4.78571	25.8	16.6923	22	0	17.875	23.1875	4.5
Day 7	04:30:00	4.4	14.5625	11.7857	32.6667	15.0769	29.625	2.1875	22.125	14	4.75
Day 7	05:00:00	6.93333	9.75	18.6429	34.0667	16.8462	38.125	9.5625	31.6875	18.25	2.3125
Day 7	05:30:00	7.86667	18.375	28	35.8	30.7692	32	10.375	29.8125	16.125	3.5
Day 7	06:00:00	14.8667	29.5	25.5	29.2	31.4615	24.6875	24.5	33.875	26.4375	5.25
Day 7	06:30:00	32.4	44.375	27.5	34.1333	38.0769	26.5	33.5	41.6875	45.5625	11.5625
Day 7	07:00:00	23.4667	47.3125	42.2143	33	37.6154	15.3125	43.625	56.75	39.5	28.5
Day 7	07:30:00	29.8	53.75	46.0714	34.3333	38.3846	16.875	46.0625	58.625	39.5	50.4375
Day 7	08:00:00	25.3333	57.4375	54.1429	33.2	38	18.25	47.3125	50.8125	37.9375	74.0625
Day 7	08:30:00	29.4	56.9375	61.5	26.8	38	17.75	50.8125	45.9375	45.4375	80.6875
Day 7	09:00:00	36.0667	60.0625	53.0714	29.8667	34.3077	9.4375	49.875	45.875	44.25	70.25
Day 7	09:30:00	30.2	56.0625	58.7857	22.9333	33.3077	8.875	51.75	47	43.625	78.875
Day 7	10:00:00	31.4	55.125	56.6429	26.9333	29.3846	17.8125	44.125	47	36.125	71.9375
Day 7	10:30:00	24.3333	49.375	46.8571	22.6	33.6923	6.875	38.5625	42.5	38.25	73.9375
Day 7	11:00:00	25.9333	45.9375	46.5	15.2	33	16.9375	27	32.125	44.875	66.0625
Day 7	11:30:00	17.6	43.8125	42.7143	17.1333	30.7692	10.0625	20	35.4375	42.8125	46.375
Day 7	12:00:00	15.4667	37.5625	36.5	14.1333	31.8462	3.9375	16.3125	39.125	35.5	32.25
Day 7	12:30:00	3.86667	25.0625	23.9286	20.4667	43.6154	5.4375	5.375	14.4375	27.125	14.8125
Day 7	13:00:00	0.533333	6.9375	4.14286	14.9333	30.2308	0.0625	0	2.4375	10.875	3.5625
Day 7	13:30:00	1.2	3.3125	0	6.33333	18.2308	0	0	1.3125	9.5625	5.8125
Day 7	14:00:00	1.06667	4.375	0.571429	0.333333	9	2.125	0	0.0625	7.5	7.0625
Day 7	14:30:00	0.866667	2.5625	2.57143	0	5.38462	0	0	0	5.75	4
Day 7	15:00:00	1.93333	1.3125	0.857143	2.66667	1.84615	0	0.0625	3	5	14
Day 7	15:30:00	0	0.0625	2.14286	3.06667	4.30769	0	0.8125	0	7.3125	6.25
Day 7	16:00:00	0.733333	0	4.92857	2.86667	0.230769	0.0625	0.3125	0.25	5.25	12.3125
Day 7	16:30:00	0	0	5.71429	1.13333	2.46154	2.125	0	6.4375	6.75	7
Day 7	17:00:00	0	3.75	6.07143	6.93333	5.07692	7	0.125	4.75	14.8125	4.1875
Day 7	17:30:00	1.13333	0.0625	7.57143	4.73333	1.30769	8.875	0	2.4375	9.375	11.5
Day 7	18:00:00	1.06667	0.0625	6.71429	4.06667	4.07692	9.9375	0	4.4375	10.3125	20.4375
Day 7	18:30:00	0	2.5	12.8571	7.86667	9.53846	3.875	0	2.75	11.8125	10.5625
Day 7	19:00:00	0.733333	7	9.28571	3.33333	6.69231	6.1875	0.6875	10.8125	11.3125	14.625
Day 7	19:30:00	2.86667	3.3125	15.5	6.13333	12	10.9375	1.5	12.9375	16.75	35.625
Day 7	20:00:00	1.2	4	7.21429	3.4	14.6923	3.5625	2.3125	5.75	11.8125	38.1875
Day 7	20:30:00	0.733333	8.125	14.5	6.26667	18.1538	7.75	0.75	9.75	17.25	28.25
Day 7	21:00:00	0.666667	9.3125	20.4286	3.8	15.5385	4.75	0.1875	10.25	16.9375	42.875
Day 7	21:30:00	0.666667	9.8125	11.8571	5.13333	12.1538	2.4375	5.375	6.75	24.1875	30.0625
Day 7	22:00:00	0.0666667	13.4375	16.0714	6.26667	14.4615	1.8125	3.6875	10.875	12.5625	29.9375
Day 7	22:30:00	0.533333	12.6875	15.2857	3.46667	8.53846	4	8.625	13.3125	9.75	23.8125
Day 7	23:00:00	0.733333	13.0625	8.64286	6	13.1538	8	4.375	6.625	15.125	23.3125
Day 7	23:30:00	6.53333	8.75	5.85714	14.2	8.76923	8.375	8.4375	9.375	13.9375	13.1875
Day 8	00:00:00	3.06667	8.0625	5.07143	9.4	8.15385	10.4375	4.3125	11.3125	9.9375	9
Day 8	00:30:00	40.6667	42.5625	65.5	28.7333	50.3846	40.625	44	53.5625	68.8125	85.875
Day 8	01:00:00	23.4667	33.5625	56.1429	25.9333	40.0769	23.25	19.25	47.25	49.25	56.125
Day 8	01:30:00	10.0667	7	23.7143	11.2667	19.7692	3.9375	1.125	21.6875	22.25	20.0625
Day 8	02:00:00	11	2.4375	8.78571	13.6667	21	7.9375	1.625	19.0625	20.125	7.8125
Day 8	02:30:00	5.8	2.8125	17.2143	13	18.9231	12.5	0	15.5625	13.1875	9.3125
Day 8	03:00:00	1.73333	1.375	20.1429	20.2667	15.2308	18.9375	0.1875	19.1875	18.25	3.5
Day 8	03:30:00	1.6	3.375	3.07143	18.8667	17.7692	39.875	3.125	18.1875	13.6875	3.75
Day 8	04:00:00	2.4	4.5	5.85714	25.0667	14.8462	31	0	14.875	16.125	2.0625
Day 8	04:30:00	9.86667	5.25	12.4286	34.5333	18.2308	21.375	3.375	26.375	14.875	1.375
Day 8	05:00:00	3.26667	14.125	1.21429	25.3333	17.6154	34.25	8.125	31.1875	13.8125	1.6875
Day 8	05:30:00	10.3333	20.875	20.6429	19.6667	19.3077	28.125	17.375	45.5625	18	5.75
Day 8	06:00:00	8.8	31.4375	36	27.2667	22.4615	26.0625	30.5	36.375	26.0625	6.5625
Day 8	06:30:00	28.2	43.6875	52.0714	29.5333	27.5385	17.875	38.9375	40.125	28.9375	13.3125
Day 8	07:00:00	28.2	45.375	40.3571	22.6667	31.4615	16.6875	46.8125	50	43.25	24.5
Day 8	07:30:00	19.9333	53.875	58.0714	19.4	32.0769	20.125	42.375	48.875	46.25	46.875
Day 8	08:00:00	33.6	51.3125	59.7857	23.2	33.0769	20.6875	43.875	52.3125	46.25	59.6875
Day 8	08:30:00	27.8667	52.8125	58.9286	22.9333	31.6154	18.8125	46.5	50	37.5	63.1875
Day 8	09:00:00	35	53.625	57.8571	19.0667	29.6154	12.3125	48.9375	45.6875	42.4375	60.8125
Day 8	09:30:00	34.5333	47.875	51.4286	14.3333	31	10.5625	39.1875	44.9375	38.6875	76.6875
Day 8	10:00:00	23.6	48.3125	61.5	13.8667	27.4615	10.125	33.125	44.5625	42.6875	62.9375
Day 8	10:30:00	18.5333	41.125	48.0714	16.5333	29.3846	10.125	32.25	38.5	33.5	60.875
Day 8	11:00:00	13.8	38.625	43.7143	16.3333	27.0769	6.125	18.6875	34.3125	35.5	48.125
Day 8	11:30:00	15.2667	30.9375	41.3571	14.5333	27.6154	9.875	20.6875	41.3125	43.875	30.4375
Day 8	12:00:00	14.8	30.0625	43	12.2667	24.9231	8.0625	13.0625	33.5625	32.625	27.8125
Day 8	12:30:00	5.73333	23.9375	35.8571	27.8667	37	7.9375	4.1875	25.9375	28.9375	17.625
Day 8	13:00:00	0.2	6.125	1.5	16.4	28.7692	2	0	8.3125	15.125	6.625
Day 8	13:30:00	0	1.875	1.85714	7.66667	11.6923	2.5	0	4.9375	12.75	2.0625
Day 8	14:00:00	0.4	1.625	0.571429	3.4	4.46154	0	0	1.6875	4.6875	6.375
Day 8	14:30:00	3	0.625	2.21429	0.333333	3.53846	0.5625	0	4.875	4.8125	1.3125
Day 8	15:00:00	0	0.5	0.428571	0.733333	3.53846	0	0	0.8125	6.125	0.5
Day 8	15:30:00	0.666667	1.125	1.5	2.93333	2.30769	0	0	0	4.5625	10.875
Day 8	16:00:00	0.533333	0.8125	1.5	2.2	4	1.375	0.125	0.25	9.125	8.875
Day 8	16:30:00	0.466667	1.125	6.07143	6.13333	1.69231	2	0.3125	1.6875	7.8125	5.375
Day 8	17:00:00	0	0.8125	5	5.33333	0.384615	5.25	0	1.125	5.625	13.25
Day 8	17:30:00	1.4	3.3125	6.92857	6.6	0.769231	3.6875	0	11.4375	5.3125	16.625
Day 8	18:00:00	4.33333	3.1875	10.4286	7	1.84615	8	0	6.625	6.875	18
Day 8	18:30:00	2.4	2.6875	11.8571	8.26667	6.69231	7.0625	0.375	5	11.8125	17.375
Day 8	19:00:00	3.93333	5.6875	9.07143	7.2	4.23077	12.875	0.0625	4.875	9.3125	28.1875
Day 8	19:30:00	1.4	2.125	6.28571	6.33333	10.2308	9.625	3.8125	8.25	15.5625	17.5
Day 8	20:00:00	0.0666667	2.3125	10.3571	5.53333	12.3077	0.9375	0.6875	8.9375	13.875	18.1875
Day 8	20:30:00	0.266667	13.9375	17.2143	10.7333	14	7.8125	1.1875	11.0625	30.375	34.0625
Day 8	21:00:00	4	9.5	20.9286	7.53333	9.30769	3.875	2.375	6.5625	13.6875	19.75
Day 8	21:30:00	1.13333	15	13.0714	3.2	11.9231	7.0625	2.375	4.3125	21.3125	28.5625
Day 8	22:00:00	1.6	6.5625	9.71429	1.13333	14.6154	5.25	5.5	4.0625	13.875	25.375
Day 8	22:30:00	1.2	8.6875	10.5	3.2	10.6923	5.625	14.5	8.3125	14.375	20.875
Day 8	23:00:00	2.06667	6.625	11.6429	6.26667	10.4615	3.75	6.3125	10.3125	18.0625	20.4375
Day 8	23:30:00	5.53333	13.8125	10.8571	10	10.3077	7.125	1	11.6875	11.1875	13.625
Day 9	00:00:00	9.2	7.1875	15.5	15.8	10.2308	8.875	1.75	12.4375	7.125	15.8125
Day 9	00:30:00	44.6667	49.5	73.7143	29.7333	46.8462	34.1875	54.75	46.6875	72.1875	77.6875
Day 9	01:00:00	19.3333	34.75	46.5	22.7333	34.1538	26.625	18.4375	55.375	46.8125	52.375
Day 9	01:30:00	6.8	4.6875	19.2857	7.8	13.3846	6.125	3.5625	11.25	12.1875	13.5
Day 9	02:00:00	8.46667	7.8125	8	10.1333	13.6154	10.1875	0.0625	16.25	15.75	7.75
Day 9	02:30:00	3.73333	0.1875	5.07143	8.66667	12	6.625	0.125	9.125	13.25	4.875
Day 9	03:00:00	4.66667	1.875	3.35714	20.2667	15.9231	20.0625	0.625	10.0625	6.875	3.9375
Day 9	03:30:00	4.53333	5.5	9.92857	25.2	13.2308	28.5625	1.5	19.5	3	0.5
Day 9	04:00:00	1.33333	5.875	6.42857	18.7333	13	27.5	1.125	17.4375	3.3125	1.375
Day 9	04:30:00	3	9.25	5.35714	20.8	9.69231	23.4375	2.625	21.125	11.1875	3.8125
Day 9	05:00:00	6.2	16.75	9.35714	23.8	14.7692	28.3125	6.1875	40	20.0625	1.25
Day 9	05:30:00	8.2	19.4375	12.8571	20.6667	17.1538	23.9375	31.0625	34.625	13.375	3.125
Day 9	06:00:00	10.5333	37.125	35.5714	15.1333	15.6154	22.1875	25	43	22.1875	6.125
Day 9	06:30:00	29.2	39.125	48.0714	22.1333	20.4615	23.0625	34.6875	47.875	23.4375	21.6875
Day 9	07:00:00	29.8	46.75	41.5714	16.2	20.6154	22.0625	36.1875	53.0625	35.875	39.4375
Day 9	07:30:00	25	43.625	69.2143	18.3333	30.3077	20.625	51.375	47	49.1875	43.8125
Day 9	08:00:00	24.5333	46	51.8571	19.0667	23.1538	16.0625	41.6875	48.8125	44.375	54.8125
Day 9	08:30:00	30.5333	50.3125	53.4286	20.6	24.8462	11.75	42.75	41.5	37.75	64.3125
Day 9	09:00:00	24.8667	50.875	46.7857	19.2	24.3846	18.75	41.9375	47.125	38.375	63.4375
Day 9	09:30:00	22	49.875	54	13.9333	21.4615	8.4375	35.125	45.375	36.75	65.6875
Day 9	10:00:00	32.3333	41.4375	45	13.9333	21.6923	7.8125	25.125	42.0625	37.75	60.1875
Day 9	10:30:00	19.4667	40.0625	41.5714	16.6	21.2308	10.25	22.75	43.0625	38	50.3125
Day 9	11:00:00	24.2667	38.0625	40.9286	11	25.0769	11.0625	18.8125	33.0625	38.3125	33.8125
Day 9	11:30:00	19.5333	29.0625	51.4286	11.9333	20.9231	15.9375	16.25	32.8125	31.25	36.75
Day 9	12:00:00	12.2667	30.8125	26.2857	13.3333	17.3846	7.625	16.4375	31.5625	29.0625	22.5
Day 9	12:30:00	5	25.5625	32.4286	41.8	26.8462	1.8125	2.4375	21.375	25.8125	12.6875
Day 9	13:00:00	0.266667	6.3125	5.71429	29.6667	22.7692	0	0	4.3125	19.3125	4.5
Day 9	13:30:00	0	3.25	2.42857	4.53333	16.1538	0	0	3.4375	13.3125	8.25
Day 9	14:00:00	0	2.9375	0.5	0.266667	6.30769	0	0	1.0625	12.75	0.9375
Day 9	14:30:00	0.466667	1.25	0.714286	1.8	1.46154	0	0	0.9375	5.4375	4.625
Day 9	15:00:00	2.33333	0.6875	3.64286	3.93333	0	0	0	0	3.25	7.875
Day 9	15:30:00	0	2.5	1.71429	2.86667	5.23077	0.0625	0	0.0625	5.5625	7.6875
Day 9	16:00:00	0.266667	0.5	2.21429	4.6	4.84615	1.125	0	3.75	3.6875	6.625
Day 9	16:30:00	0	0.625	3.5	3.46667	0.692308	0.3125	0	3.6875	2.5625	8.875
Day 9	17:00:00	0	0	2.85714	1.86667	0.923077	2	0.3125	3.8125	3.4375	7.9375
Day 9	17:30:00	0	0	1.14286	7.26667	3	7.625	0	2.8125	1.0625	10.6875
Day 9	18:00:00	3.86667	0.5	7.71429	4	5.23077	11.375	0.1875	1.1875	5.8125	19.1875
Day 9	18:30:00	3	1.8125	13	6	9.30769	4	2.0625	8.3125	16.1875	13.0625
Day 9	19:00:00	0.533333	5.125	11.5714	2.26667	3.15385	4.1875	0	1.8125	13.625	20.9375
Day 9	19:30:00	0.866667	6.625	12.3571	4.86667	9.38462	13.1875	2.9375	11.8125	24.1875	25.0625
Day 9	20:00:00	3.66667	3.6875	9.35714	0.733333	7.30769	2.5	1.9375	4	21.1875	16.9375
Day 9	20:30:00	0.2	5.625	15.4286	1.46667	19.0769	3.9375	8.375	10.3125	13.25	10.6875
Day 9	21:00:00	0.133333	13.8125	15.7857	0.866667	10.7692	4.3125	3.5625	5.8125	19.9375	22.8125
Day 9	21:30:00	1.26667	11.75	9.21429	0.533333	13.8462	2.8125	0.25	16.5	7.625	22.0625
Day 9	22:00:00	3.8	11.8125	10.0714	4.2	10.9231	7.375	1	10.0625	22.25	33.4375
Day 9	22:30:00	2.2	7.25	11.4286	6.73333	10.6923	5.25	3.4375	8	22.0625	19.25
Day 9	23:00:00	7.4	15.25	8.78571	5.53333	4.69231	1.4375	4.25	5.625	22.5	14.375
Day 9	23:30:00	8.66667	5.5	8.57143	11.6	5.46154	3.375	5.3125	9.5	14.4375	12.125
Day 10	00:00:00	16.4	10	12.7143	14.9333	7	11.5	6.4375	22.4375	11.375	13.75
Day 10	00:30:00	40.0667	45.0625	67.1429	30.0667	43.4615	44.75	48.8125	49.5	63.6875	58.875
Day 10	01:00:00	19.8	39.5	63.7143	26.6667	31.7692	27.875	16.625	54.4375	46.3125	34.4375
Day 10	01:30:00	4.4	8.5	16.9286	13.1333	13.3077	3.1875	2.3125	22.875	20.3125	3.125
Day 10	02:00:00	5.73333	14.75	7.42857	8.2	8.76923	3.75	1.5	18.25	10.8125	6.75
Day 10	02:30:00	4.26667	6.1875	8.5	9.53333	12.2308	6.5	0.125	13.5625	15	4
Day 10	03:00:00	4.4	3.6875	6.42857	16.2	12.6923	20.75	0	10.5625	7.4375	1.125
Day 10	03:30:00	2.66667	6.5	2.57143	19.6	11.8462	27.875	1	11.0625	8.875	1.1875
Day 10	04:00:00	6.66667	10.25	2.35714	18.4	9.76923	21.3125	3.875	16.25	11.875	1.0625
Day 10	04:30:00	13.6	16.9375	5.92857	19.2667	7.84615	18.875	5.625	20.8125	7.9375	3.625
Day 10	05:00:00	10.0667	9.4375	8.14286	16.9333	11.2308	24.6875	11.9375	19.75	10.3125	1.5625
Day 10	05:30:00	7	31.5	24.2143	19.6	8.15385	29	24.9375	26.6875	12.3125	6.875
Day 10	06:00:00	19.6	57.0625	37.2857	17.6	14.5385	24.4375	31.0625	50	16.6875	16.0625
Day 10	06:30:00	25.2667	38.375	47.5714	15.6667	18.6154	20.9375	44.1875	46	24.75	12.6875
Day 10	07:00:00	19.4	52.5625	46.6429	16.3333	18.5385	19	38.9375	47.9375	40.8125	31.9375
Day 10	07:30:00	22.9333	42.5	50.3571	15.5333	21.3846	23.625	40.625	48.1875	36.875	44.5625
Day 10	08:00:00	26.8667	51	45.7143	17.6	21.8462	16.5625	38.5625	39	32.1875	48.75
Day 10	08:30:00	24.6	48	54.1429	13.9333	20.7692	19.3125	37.125	37.5625	38.75	51.5
Day 10	09:00:00	23.7333	39.125	47.3571	12.7333	19.6923	12.5	34	45.875	37.75	51.375
Day 10	09:30:00	20.3333	43.0625	46.5714	11.1333	19.9231	13.5	24.9375	38	39.375	49.375
Day 10	10:00:00	23.4667	40.4375	40.4286	9.4	19.5385	12.75	27.375	38.3125	32.0625	37.875
Day 10	10:30:00	25	36.5625	45.3571	10.5333	17.0769	12.125	16.9375	38.3125	30.25	38
Day 10	11:00:00	15.4667	35.25	43.5714	8.6	18.0769	11.9375	16.0625	34.5625	35.3125	28
Day 10	11:30:00	19.7333	31.5	42.6429	7.46667	16.2308	6.5	15.5625	37.125	27.125	26.625
Day 10	12:00:00	6.66667	27.9375	38.8571	6.86667	18.2308	7	8.625	34.25	34.6875	19.125
Day 10	12:30:00	10.2667	26	28.1429	25.7333	24.4615	2.9375	4.5625	27.9375	21.9375	10.625
Day 10	13:00:00	2.53333	9.4375	6.35714	14.7333	16.2308	0	0	4.5	11.0625	3.8125
Day 10	13:30:00	0	4.8125	1.85714	2.86667	6.38462	2.3125	0	4.0625	15.5625	0.0625
Day 10	14:00:00	0.133333	6.125	0	0	4.84615	2.0625	0	3.8125	5.375	4.8125
Day 10	14:30:00	0	4.4375	0	0	2.38462	1.125	0.0625	0.75	3.9375	4.4375
Day 10	15:00:00	0.533333	1.75	2.28571	0.333333	1.38462	2.3125	0	1.3125	2.25	2.375
Day 10	15:30:00	1.73333	2.625	2.42857	3.73333	4.46154	0.0625	0	0	3.0625	1.4375
Day 10	16:00:00	0	1.375	5	0.333333	1.07692	0.0625	0	1.9375	2.6875	1.875
Day 10	16:30:00	0	0.875	4.42857	8.53333	2.69231	0.5	0	4.25	2.3125	6.75
Day 10	17:00:00	0.8	0	6.92857	4.93333	1.23077	3.5	0	1.375	1.375	14.8125
Day 10	17:30:00	0.0666667	1.5	2.42857	2	4.30769	4.6875	0.125	5.125	5.1875	11.5
Day 10	18:00:00	1.66667	0.4375	5.14286	2.93333	2.69231	9.9375	0.125	0.5	4.8125	15.5625
Day 10	18:30:00	0	0.6875	12.5714	2.33333	7.61538	6.125	0.125	7.6875	6.4375	12.3125
Day 10	19:00:00	6.73333	0.75	13.4286	1.66667	11.6923	3.8125	1.625	3.25	8.5	17.8125
Day 10	19:30:00	4	3.625	14.8571	1.66667	9.53846	11.1875	3.875	11.6875	22.375	19.375
Day 10	20:00:00	1.13333	4.5625	4.92857	0.333333	6.53846	3.375	3.5625	8.8125	21.9375	9.75
Day 10	20:30:00	3.53333	9.375	12.2857	0.6	6.84615	8.25	3.4375	14.9375	14.625	23.0625
Day 10	21:00:00	0.466667	4.3125	13.2857	2	6.07692	6.125	1.0625	10.0625	8.6875	13.25
Day 10	21:30:00	0.866667	9.875	8.35714	1.06667	11	3.4375	4.9375	6	12.875	16.8125
Day 10	22:00:00	1.46667	11.8125	9.5	1.53333	5.84615	5.5	1.3125	8.75	8.8125	19.5
Day 10	22:30:00	2.46667	9.4375	11.5714	2.2	11.9231	3.25	0.3125	16.6875	21.6875	19.875
Day 10	23:00:00	11.9333	15.5625	13.2143	5.13333	8.69231	0	3.4375	8.8125	12.9375	17.875
Day 10	23:30:00	7.53333	9.875	9.92857	6.06667	8.76923	3.75	3.125	16.625	10.5625	13.375

## Sheet: Quantification
	Evening peak phase relative to w1118
Genotype	Experiment 1	Experiment 2	Experiment 3	Experiment 4	Experiment 5		AVERAGE	SEM
Figure 4C
TD2/+	0	1.25	1.5	0	-0.125		0.525	0.35
larpRNAiGD/+			1.625	0.625	0.375		0.875	0.381881
TD2/larpRNAiGD			-0.375	0.875	0.375		0.291667	0.363242
PsiRNAiGD/+	0.375	1.125	-0.375	1.25			0.59375	0.3763
TD2/Psi-RNAiGD	3.375	3.875	2.625	3.875	3.875		3.525	0.244949
Figure 4D
VIE260B/+			1.25	0.875	0.75		0.958333	0.150231
TD2/VIE260B			1.125	0.125	0.625		0.625	0.288675
Rbp9RNAiKK/+			2	0.75	0.375		1.04167	0.491243
TD2/Rbp9RNAiKK			1.125	-0.125	1		0.666667	0.397475
PsiRNAiKK/+	1.25	1.75	2.125	0.875			1.5	0.274811
TD2/PsiRNAiKK	3.5	4	4.5	4.125	4.125		4.05	0.161051
