# Supplementary material for: Drosophila PSI controls circadian period and the phase of circadian behavior under temperature cycle via tim splicing
Source: eLife journal article supplement (doi:10.7554/elife.50063), 2019-11-08
Supplement: supp [file elife-50063-supp-v1.zip › elife_poa_e50063_Figure_4_source_data_2.xlsx]

## Sheet: Figure 4
Figure 4C
	TD2/+	PsiRNAiGD/+	TD2/PsiRNAiGD	larpRNAiGD/+	TD2/larp-RNAiGD
Mean	0.525	0.5938	3.525	0.875	0.2917
SEM	0.35	0.3763	0.2449	0.3819	0.3632
Number of runs	5	4	5	3	3
One-way ANOVA followed by:
Tukey's multiple comparisons test	Mean Diff.	95.00% CI of diff.	Significant?	Summary	Adjusted P Value
TD2/+ vs. PsiRNAiGD/+	-0.06875	-1.485 to 1.348	No	ns	0.9999
TD2/+ vs. TD2/PsiRNAiGD	-3	-4.336 to -1.664	Yes	****	<0.0001
TD2/+ vs. larpRNAiGD/+	-0.35	-1.892 to 1.192	No	ns	0.9532
TD2/+ vs. TD2/larp-RNAiGD	0.2333	-1.309 to 1.776	No	ns	0.9892
PsiRNAiGD/+ vs. TD2/PsiRNAiGD	-2.931	-4.348 to -1.515	Yes	***	0.0001
PsiRNAiGD/+ vs. larpRNAiGD/+	-0.2813	-1.894 to 1.332	No	ns	0.9817
PsiRNAiGD/+ vs. TD2/larp-RNAiGD	0.3021	-1.311 to 1.915	No	ns	0.9763
TD2/PsiRNAiGD vs. larpRNAiGD/+	2.65	1.108 to 4.192	Yes	***	0.0007
TD2/PsiRNAiGD vs. TD2/larp-RNAiGD	3.233	1.691 to 4.776	Yes	****	<0.0001
larpRNAiGD/+ vs. TD2/larp-RNAiGD	0.5833	-1.141 to 2.308	No	ns	0.8309
Figure 4D
	(KK host strain) VIE-260B/+	TD2/VIE-260B	PsiRNAiKK/+	TD2/PsiRNAiKK	Rbp9RNAiKK/+	TD2/Rbp9RNAiKK
Mean	0.9583	0.625	1.5	4.05	1.042	0.6667
SEM	0.1502	0.2887	0.2748	0.1611	0.4912	0.3975
Number of runs	3	3	4	5	3	3
One-way ANOVA followed by:
Tukey's multiple comparisons test	Mean Diff.	95.00% CI of diff.	Significant?	Summary	Adjusted P Value
(KK host strain) VIE-260B/+ vs. TD2/VIE-260B	0.3333	-1.113 to 1.779	No	ns	0.972
(KK host strain) VIE-260B/+ vs. PsiRNAiKK/+	-0.5417	-1.894 to 0.8109	No	ns	0.7801
(KK host strain) VIE-260B/+ vs. TD2/PsiRNAiKK	-3.092	-4.385 to -1.798	Yes	****	<0.0001
(KK host strain) VIE-260B/+ vs. Rbp9RNAiKK/+	-0.08333	-1.529 to 1.363	No	ns	>0.9999
(KK host strain) VIE-260B/+ vs. TD2/Rbp9RNAiKK	0.2917	-1.154 to 1.738	No	ns	0.9843
TD2/VIE-260B vs. PsiRNAiKK/+	-0.875	-2.228 to 0.4775	No	ns	0.3368
TD2/VIE-260B vs. TD2/PsiRNAiKK	-3.425	-4.718 to -2.132	Yes	****	<0.0001
TD2/VIE-260B vs. Rbp9RNAiKK/+	-0.4167	-1.863 to 1.029	No	ns	0.9306
TD2/VIE-260B vs. TD2/Rbp9RNAiKK	-0.04167	-1.488 to 1.404	No	ns	>0.9999
PsiRNAiKK/+ vs. TD2/PsiRNAiKK	-2.55	-3.738 to -1.362	Yes	****	<0.0001
PsiRNAiKK/+ vs. Rbp9RNAiKK/+	0.4583	-0.8942 to 1.811	No	ns	0.8735
PsiRNAiKK/+ vs. TD2/Rbp9RNAiKK	0.8333	-0.5192 to 2.186	No	ns	0.3854
TD2/PsiRNAiKK vs. Rbp9RNAiKK/+	3.008	1.715 to 4.302	Yes	****	<0.0001
TD2/PsiRNAiKK vs. TD2/Rbp9RNAiKK	3.383	2.09 to 4.677	Yes	****	<0.0001
Rbp9RNAiKK/+ vs. TD2/Rbp9RNAiKK	0.375	-1.071 to 1.821	No	ns	0.9544
