# Supplementary material for: Drosophila PSI controls circadian period and the phase of circadian behavior under temperature cycle via tim splicing
Source: eLife journal article supplement (doi:10.7554/elife.50063), 2019-11-08
Supplement: supp [file elife-50063-supp-v1.zip › elife_poa_e50063_Figure_5_source_data_1.xlsx]

## Sheet: Figure 5 B C
Genotype	Rhythmic (R)/Arrhythmic (A)	Period	Power	Width
TG4/PsiRNAiKK; UAS-Dcr2/+	A	23.3	9.8	2.5
TG4/PsiRNAiKK; UAS-Dcr2/+	R	23.7	95	3.5
TG4/PsiRNAiKK; UAS-Dcr2/+	R	23.4	78.5	3
TG4/PsiRNAiKK; UAS-Dcr2/+	R	23.9	61.9	4
TG4/PsiRNAiKK; UAS-Dcr2/+	R	24	67.6	4
TG4/PsiRNAiKK; UAS-Dcr2/+	R	23.7	46.2	2.5
TG4/PsiRNAiKK; UAS-Dcr2/+	R	24.1	53.4	2.5
TG4/PsiRNAiKK; UAS-Dcr2/+	R	24.2	27.5	4.5
TG4/PsiRNAiKK; UAS-Dcr2/+	A	23.9	7	1
TG4/PsiRNAiKK; UAS-Dcr2/+	A	23.3	13.3	2.5
TG4/PsiRNAiKK; UAS-Dcr2/+	R	23.2	54.1	3.5
TG4/PsiRNAiKK; UAS-Dcr2/+	R	23.6	56.3	2.5
TG4/PsiRNAiKK; UAS-Dcr2/+	R	23.2	42.2	2.5
TG4/PsiRNAiKK; UAS-Dcr2/+	A	23	16.6	2
TG4/PsiRNAiKK; UAS-Dcr2/+	R	23.2	83	3.5
TG4/PsiRNAiKK; UAS-Dcr2/+	R	23.7	21.3	2.5
TG4/PsiRNAiKK; UAS-Dcr2/+	A	22	-6.2	0
TG4/PsiRNAiKK; UAS-Dcr2/+	R	23.3	88.1	3
TG4/PsiRNAiKK; UAS-Dcr2/+	R	23.2	25.8	1.5
TG4/PsiRNAiKK; UAS-Dcr2/+	R	23.3	82.8	3
TG4/PsiRNAiKK; UAS-Dcr2/+	R	23.6	114.5	3.5
TG4/PsiRNAiKK; UAS-Dcr2/+	R	23.4	57.3	3
TG4/PsiRNAiKK; UAS-Dcr2/+	R	23.6	90.7	3.5
TG4/PsiRNAiKK; UAS-Dcr2/+	R	23.8	120.6	4
TG4/PsiRNAiKK; UAS-Dcr2/+	A	23	25	1
TG4/PsiRNAiKK; UAS-Dcr2/+	A	22.7	14.2	1.5
TG4/PsiRNAiKK; UAS-Dcr2/+	R	22.9	38.7	2
TG4/PsiRNAiKK; UAS-Dcr2/+	R	23.8	99.2	4
TG4/PsiRNAiKK; UAS-Dcr2/+	R	23.2	35.2	2.5
TG4/PsiRNAiKK; UAS-Dcr2/+	R	23.4	21.4	2
TG4/PsiRNAiKK; UAS-Dcr2/+	R	23.7	24.8	1.5
TG4/PsiRNAiKK; UAS-Dcr2/+	A	23.2	4.1	0.5
TG4/PsiRNAiKK; UAS-Dcr2/+	A	24.2	13	2.5
TG4/PsiRNAiKK; UAS-Dcr2/+	R	23.2	42	2.5
TG4/PsiRNAiKK; UAS-Dcr2/+	R	23.4	55.3	3
TG4/PsiRNAiKK; UAS-Dcr2/+	R	22.9	22.7	2
TG4/PsiRNAiKK; UAS-Dcr2/+	R	23.4	51.7	3
TG4/PsiRNAiKK; UAS-Dcr2/+	A	23.5	10.1	1
TG4/PsiRNAiKK; UAS-Dcr2/+	R	23.7	38.2	1.5
TG4/PsiRNAiKK; UAS-Dcr2/+	A	22.7	19.5	1.5
TG4/PsiRNAiKK; UAS-Dcr2/+	R	23.4	50.4	4
TG4/PsiRNAiKK; UAS-Dcr2/+	R	23.6	76.8	3.5
TG4/PsiRNAiKK; UAS-Dcr2/+	R	23.3	100.2	3
TG4/PsiRNAiKK; UAS-Dcr2/+	R	23.2	36.5	2.5
TG4/PsiRNAiKK; UAS-Dcr2/+	R	23.1	106.5	3.5
TG4/PsiRNAiKK; UAS-Dcr2/+	R	23.2	91.1	3.5
TG4/PsiRNAiKK; UAS-Dcr2/+	R	23.4	31.3	3
TG4/PsiRNAiKK; UAS-Dcr2/+	A	23.7	4.1	1.5
TG4/PsiRNAiKK; UAS-Dcr2/+	A	22.9	8.4	2
TG4/PsiRNAiKK; UAS-Dcr2/+	R	23.2	48.4	3.5
TG4/PsiRNAiKK; UAS-Dcr2/+	R	23.9	55.5	5
TG4/PsiRNAiKK; UAS-Dcr2/+	R	22.9	38.6	3
TG4/PsiRNAiKK; UAS-Dcr2/+	R	23	36.4	3
TG4/PsiRNAiKK; UAS-Dcr2/+	R	23.4	95.7	4
TG4/PsiRNAiKK; UAS-Dcr2/+	R	23.4	71	3
TG4/PsiRNAiKK; UAS-Dcr2/+	A	23	4.1	1
TG4/PsiRNAiKK; UAS-Dcr2/+	R	23.4	24	2
TG4/+; UAS-Dcr2/+	R	25.1	85	4.5
TG4/+; UAS-Dcr2/+	R	25.1	62	3.5
TG4/+; UAS-Dcr2/+	R	24.8	69.8	4
TG4/+; UAS-Dcr2/+	R	24.7	64.9	3.5
TG4/+; UAS-Dcr2/+	R	24.9	45.5	3
TG4/+; UAS-Dcr2/+	R	25.1	55.7	3.5
TG4/+; UAS-Dcr2/+	R	24.9	91	4
TG4/+; UAS-Dcr2/+	R	25.4	69.6	4
TG4/+; UAS-Dcr2/+	R	24.9	54.4	3
TG4/+; UAS-Dcr2/+	R	25	26.2	3
TG4/+; UAS-Dcr2/+	R	24.7	40.7	3.5
TG4/+; UAS-Dcr2/+	R	24.4	50.2	3
TG4/+; UAS-Dcr2/+	R	24.7	41.7	3.5
TG4/+; UAS-Dcr2/+	A	12.3	21.4	1
TG4/+; UAS-Dcr2/+	R	24.7	35.1	3.5
TG4/+; UAS-Dcr2/+	A	12.2	8.6	0.5
TG4/+; UAS-Dcr2/+	R	24.7	53.3	3.5
TG4/+; UAS-Dcr2/+	R	24.7	39.4	3.5
TG4/+; UAS-Dcr2/+	R	24.7	45.3	2.5
TG4/+; UAS-Dcr2/+	A	12.2	0.2	0.5
TG4/+; UAS-Dcr2/+	R	24.7	42.8	3.5
TG4/+; UAS-Dcr2/+	R	25.2	34.9	3.5
TG4/+; UAS-Dcr2/+	R	24.4	49.9	3
TG4/+; UAS-Dcr2/+	R	24.5	48.8	3
TG4/+; UAS-Dcr2/+	R	25.3	84.6	5
TG4/+; UAS-Dcr2/+	R	25.3	82.7	5
TG4/+; UAS-Dcr2/+	R	25.2	59.4	4.5
TG4/+; UAS-Dcr2/+	R	24.9	46.4	3
TG4/+; UAS-Dcr2/+	R	24.9	72.7	4
TG4/+; UAS-Dcr2/+	R	25.1	52.6	4.5
TG4/+; UAS-Dcr2/+	R	25.4	79.1	5
TG4/+; UAS-Dcr2/+	R	25.3	71.2	5
TG4/+; UAS-Dcr2/+	R	24.9	74.8	4
TG4/+; UAS-Dcr2/+	R	24.9	93.5	5
TG4/+; UAS-Dcr2/+	R	24.9	56.1	4
TG4/+; UAS-Dcr2/+	R	24.9	79.5	4
tim0,TG4/tim0; UAS-Dcr2/timHA	R	24.5	29.6	3
tim0,TG4/tim0; UAS-Dcr2/timHA	A	12.4	2.4	1
tim0,TG4/tim0; UAS-Dcr2/timHA	R	24.4	74.7	4
tim0,TG4/tim0; UAS-Dcr2/timHA	A	23.7	0.2	0.5
tim0,TG4/tim0; UAS-Dcr2/timHA	A	25.7	8.1	2.5
tim0,TG4/tim0; UAS-Dcr2/timHA	R	24.4	29.9	3
tim0,TG4/tim0; UAS-Dcr2/timHA	A	24	-1.1	0
tim0,TG4/tim0; UAS-Dcr2/timHA	R	25.2	21.3	2.5
tim0,TG4/tim0; UAS-Dcr2/timHA	R	25	29.8	2
tim0,TG4/tim0; UAS-Dcr2/timHA	A	24.5	-0.9	0
tim0,TG4/tim0; UAS-Dcr2/timHA	R	24.7	53.2	3.5
tim0,TG4/tim0; UAS-Dcr2/timHA	R	24.8	28.5	2.5
tim0,TG4/tim0; UAS-Dcr2/timHA	R	25.1	68.2	4.5
tim0,TG4/tim0; UAS-Dcr2/timHA	R	24.7	28	3.5
tim0,TG4/tim0; UAS-Dcr2/timHA	R	25.2	37.5	4.5
tim0,TG4/tim0; UAS-Dcr2/timHA	R	25	37.9	3
tim0,TG4/tim0; UAS-Dcr2/timHA	R	24.2	31.5	2.5
tim0,TG4/tim0; UAS-Dcr2/timHA	R	25.2	23.3	2.5
tim0,TG4/tim0; UAS-Dcr2/timHA	R	25.3	91.8	5
tim0,TG4/tim0; UAS-Dcr2/timHA	R	25.1	52.1	4.5
tim0,TG4/tim0; UAS-Dcr2/timHA	R	25.6	42.9	4.5
tim0,TG4/tim0; UAS-Dcr2/timHA	A	26.7	13.7	4.5
tim0,TG4/tim0; UAS-Dcr2/timHA	R	25.1	57.9	3.5
tim0,TG4/tim0; UAS-Dcr2/timHA	R	24.9	50.7	4
tim0,TG4/tim0; UAS-Dcr2/timHA	R	24.9	39.5	3
tim0,TG4/tim0; UAS-Dcr2/timHA	A	25	15.6	2
tim0,TG4/tim0; UAS-Dcr2/timHA	R	25.4	46.5	4
tim0,TG4/tim0; UAS-Dcr2/timHA	R	24.9	54.6	4
tim0,TG4/tim0,PsiRNAiKK; UAS-Dcr2/timHA	R	25.1	35.9	3.5
tim0,TG4/tim0,PsiRNAiKK; UAS-Dcr2/timHA	R	25	44.7	4
tim0,TG4/tim0,PsiRNAiKK; UAS-Dcr2/timHA	R	24.7	26.6	3.5
tim0,TG4/tim0,PsiRNAiKK; UAS-Dcr2/timHA	A	25.2	17.5	2.5
tim0,TG4/tim0,PsiRNAiKK; UAS-Dcr2/timHA	R	24.7	34	3.5
tim0,TG4/tim0,PsiRNAiKK; UAS-Dcr2/timHA	R	24.6	37.9	2.5
tim0,TG4/tim0,PsiRNAiKK; UAS-Dcr2/timHA	R	24.4	40.7	3
tim0,TG4/tim0,PsiRNAiKK; UAS-Dcr2/timHA	R	25	77.9	4.5
tim0,TG4/tim0,PsiRNAiKK; UAS-Dcr2/timHA	R	25.1	73.2	4.5
tim0,TG4/tim0,PsiRNAiKK; UAS-Dcr2/timHA	R	24.7	39.2	2.5
tim0,TG4/tim0,PsiRNAiKK; UAS-Dcr2/timHA	R	25.1	74.7	3.5
tim0,TG4/tim0,PsiRNAiKK; UAS-Dcr2/timHA	A	27.5	-9.5	0
tim0,TG4/tim0,PsiRNAiKK; UAS-Dcr2/timHA	R	24.8	52.9	5.5
tim0,TG4/tim0,PsiRNAiKK; UAS-Dcr2/timHA	R	24.4	56.9	3
tim0,TG4/tim0,PsiRNAiKK; UAS-Dcr2/timHA	R	25.2	37.9	4.5
tim0,TG4/tim0,PsiRNAiKK; UAS-Dcr2/timHA	R	24.5	25.5	2
tim0,TG4/tim0,PsiRNAiKK; UAS-Dcr2/timHA	A	24.3	11.2	2.5
tim0,TG4/tim0,PsiRNAiKK; UAS-Dcr2/timHA	R	24.7	38.3	2.5
tim0,TG4/tim0,PsiRNAiKK; UAS-Dcr2/timHA	R	24.2	37.6	2.5
tim0,TG4/tim0,PsiRNAiKK; UAS-Dcr2/timHA	A	24.5	5.5	2
tim0,TG4/tim0,PsiRNAiKK; UAS-Dcr2/timHA	A	24.7	5.4	0.5
tim0,TG4/tim0,PsiRNAiKK; UAS-Dcr2/timHA	R	24.6	50.1	3.5
tim0,TG4/tim0,PsiRNAiKK; UAS-Dcr2/timHA	R	24.7	32.7	3.5
tim0,TG4/tim0,PsiRNAiKK; UAS-Dcr2/timHA	A	23	7.7	2
tim0,TG4/tim0,PsiRNAiKK; UAS-Dcr2/timHA	A	12.5	-12	0
tim0,TG4/tim0,PsiRNAiKK; UAS-Dcr2/timHA	R	24.2	60.7	3.5
tim0,TG4/tim0,PsiRNAiKK; UAS-Dcr2/timHA	R	24.6	57	3.5
tim0,TG4/tim0,PsiRNAiKK; UAS-Dcr2/timHA	R	24.4	56.4	3
tim0,TG4/tim0,PsiRNAiKK; UAS-Dcr2/timHA	R	25.3	62.6	5
tim0,TG4/tim0,PsiRNAiKK; UAS-Dcr2/timHA	R	25.4	57.8	5
tim0,TG4/tim0,PsiRNAiKK; UAS-Dcr2/timHA	A	11.5	-4.7	0
tim0,TG4/tim0,PsiRNAiKK; UAS-Dcr2/timHA	R	24.9	48.2	4
tim0,TG4/tim0,PsiRNAiKK; UAS-Dcr2/timHA	R	25.2	49.7	3.5
tim0,TG4/tim0,PsiRNAiKK; UAS-Dcr2/timHA	R	24.6	85.9	4.5
tim0,TG4/tim0,PsiRNAiKK; UAS-Dcr2/timHA	R	24.9	48.6	4
tim0,TG4/tim0,PsiRNAiKK; UAS-Dcr2/timHA	R	25.5	74.3	5.5
tim0,TG4/tim0,PsiRNAiKK; UAS-Dcr2/timHA	R	24.9	50	4
tim0,TG4/tim0,PsiRNAiKK; UAS-Dcr2/timHA	R	24.2	30.7	2.5

## Sheet: Fig 5 D E Experiment 1
		TG4/PsiRNAiKK; UAS-Dcr2/+	w1118	tim0,TG4/tim0,PsiRNAiKK; UAS-Dcr2/timHA	TG4/+; UAS-Dcr2/+	tim0,TG4/tim0; UAS-Dcr2/timHA	tim0,PsiRNAiKK/tim0; timHA/+	PsiRNAiKK/+
Day 7	00:00:00	12.25	21.9375	17.6	8.5	17.3	22.3	11.5625
Day 7	00:30:00	23.75	68.6875	22.6	66.6875	46.4	44.8	34.5625
Day 7	01:00:00	14.75	56.3125	27	42.1875	60	35.7	14.125
Day 7	01:30:00	14.75	25.25	31.6	10.625	43.7	42.2	10.8125
Day 7	02:00:00	20.4375	22	26.8	10.3125	38.9	32.8	5.4375
Day 7	02:30:00	25.875	8.9375	16.5	3.375	26.2	29.5	8.8125
Day 7	03:00:00	15.625	3.5625	25.5	1	55.1	27.6	6.1875
Day 7	03:30:00	35.9375	6.8125	20.6	4.0625	24.8	31.6	9.5625
Day 7	04:00:00	31.25	2.1875	21.3	8.5	30.8	31	13.9375
Day 7	04:30:00	39.4375	6.25	32.9	3.3125	27	27	23.1875
Day 7	05:00:00	32.875	3.9375	30.1	15.75	25.4	26.3	33.25
Day 7	05:30:00	31.6875	7.9375	27.7	22.3125	25.8	20.6	36.375
Day 7	06:00:00	29.75	13.5625	35.6	39.625	39.3	32.8	67.3125
Day 7	06:30:00	22.375	41.125	51.4	53.625	39.4	30	55.3125
Day 7	07:00:00	24.8125	52.5	49.6	51.6875	44.5	32.2	53.125
Day 7	07:30:00	20.1875	85.6875	49.4	68.6875	54.1	34.5	55.75
Day 7	08:00:00	19.125	85.75	59.5	60.4375	48.1	43.8	46.25
Day 7	08:30:00	20.375	86.8125	60.7	59.6875	48.7	27.5	43.875
Day 7	09:00:00	22.0625	85.3125	57.9	62.75	47.6	38.2	45.0625
Day 7	09:30:00	7.9375	84.1875	63.2	61.625	52.3	42.6	42.625
Day 7	10:00:00	16.25	86.5625	56.9	53.625	46.6	52.9	37.4375
Day 7	10:30:00	6.625	83.25	48.5	41.1875	55	44.5	36.1875
Day 7	11:00:00	10.375	77.75	45.7	38.875	49.9	51	29.4375
Day 7	11:30:00	9.25	70.9375	40.7	32	51.4	52.5	29.125
Day 7	12:00:00	6	58.75	35.1	26.6875	44.6	47.3	24.6875
Day 7	12:30:00	5.125	19	29.1	13.0625	37.3	19.5	13.4375
Day 7	13:00:00	1.625	0.0625	17.4	0.1875	13.4	9.1	0
Day 7	13:30:00	2.0625	0	7.5	0.0625	3.1	3.3	0.25
Day 7	14:00:00	1.5	0	3.9	0	0.6	6.3	0
Day 7	14:30:00	0	1.5625	2.4	0	2.5	1.8	0
Day 7	15:00:00	0	0	3.2	2.9375	0	12.6	1.125
Day 7	15:30:00	1.3125	0.1875	3.5	0.4375	1.1	3.3	0.625
Day 7	16:00:00	2.5	2.1875	4.4	0.3125	0.4	3.7	2.375
Day 7	16:30:00	0.625	0.4375	5.9	1.125	0	2.7	1.0625
Day 7	17:00:00	3.4375	2.375	1.5	0.375	0	0.5	3.3125
Day 7	17:30:00	3.5	4.9375	0.3	0.9375	0.3	0.1	6.875
Day 7	18:00:00	2.75	3.6875	0.7	0	0.3	0.8	2.3125
Day 7	18:30:00	4.6875	6	2.2	0.625	0	0	3.5
Day 7	19:00:00	3.375	4.9375	1.1	4.75	2	0	5.5625
Day 7	19:30:00	4.6875	17.6875	5.3	8.625	1.3	2.4	7.25
Day 7	20:00:00	5.5	7.6875	6.4	12.4375	1.1	4.1	5.4375
Day 7	20:30:00	5.75	7.0625	4.6	8.8125	0.7	3.6	8.9375
Day 7	21:00:00	3.9375	12.75	12.2	11.875	3.6	4.8	8.0625
Day 7	21:30:00	4.8125	27	13.3	5	4.4	8.6	4.375
Day 7	22:00:00	6.125	25.6875	14.8	8.25	2.3	19.9	6.125
Day 7	22:30:00	1.75	33.1875	12.1	3.875	2.7	35.4	6
Day 7	23:00:00	6.625	23.625	9.1	3.875	13.1	15	3.5625
Day 7	23:30:00	5.8125	30.1875	10.2	3.6875	7.6	18.8	5.25
Day 8	00:00:00	2	19.75	12.7	11.125	7.9	24.1	4.3125
Day 8	00:30:00	21.0625	46.75	20.6	54.875	34.7	66.9	32.625
Day 8	01:00:00	15.9375	52.3125	26.8	43.0625	57.6	46.4	17.3125
Day 8	01:30:00	9.875	24.625	33.3	14.875	49.6	42.2	16
Day 8	02:00:00	15	15.1875	25.1	5	36	27.5	8.875
Day 8	02:30:00	27.875	8.625	21.7	4.0625	33.9	24.9	8.25
Day 8	03:00:00	28.5625	4.875	19.5	3.5	33.1	27.3	4.8125
Day 8	03:30:00	32	0	12.7	11.3125	31.8	24.1	12.9375
Day 8	04:00:00	31	0	12.8	3.6875	21.6	30.3	17.125
Day 8	04:30:00	39.6875	1	22.9	3.5	17.7	16.5	16.0625
Day 8	05:00:00	32.8125	0.4375	33.9	6.375	22.7	26	41.4375
Day 8	05:30:00	23.125	3.625	25.1	15.0625	17.2	26.5	53.875
Day 8	06:00:00	28.75	19.5625	46.5	34	29.2	37.8	55
Day 8	06:30:00	16.75	50.625	50.9	45.125	31.3	25.5	51
Day 8	07:00:00	22.4375	74.3125	53.6	54.8125	38.8	28	46.625
Day 8	07:30:00	22.5625	80.6875	54.6	69.1875	42.9	38.5	48.5625
Day 8	08:00:00	10	81.625	46.2	57.875	48.7	35	46.875
Day 8	08:30:00	17.125	86	57.3	57.1875	45.3	40	49.75
Day 8	09:00:00	15.875	81.75	54	60.3125	39	43.7	43.5625
Day 8	09:30:00	10.6875	84.625	53.8	49.5625	43	36.1	37.5625
Day 8	10:00:00	14.25	79	49.2	54	49.1	39.8	40.5625
Day 8	10:30:00	12.5625	73.5	47.8	41.0625	48.8	35.8	27.4375
Day 8	11:00:00	9.5625	65.0625	41.4	39.4375	51.1	46.1	30.0625
Day 8	11:30:00	10.875	52.6875	44.9	34.9375	51.7	44.3	29.375
Day 8	12:00:00	5.375	38.875	35	21.9375	42.6	32.6	15.75
Day 8	12:30:00	4.25	17.3125	28.7	11.6875	37.8	13.6	14.125
Day 8	13:00:00	5.1875	0	13.6	0	11.9	1	0
Day 8	13:30:00	2.8125	0	2.9	0	2.4	5.7	1.5
Day 8	14:00:00	0	0.125	1.4	0	2.1	1.9	0.25
Day 8	14:30:00	0.125	0.5625	4.1	0	0.1	1	0
Day 8	15:00:00	0.125	0.3125	3.2	0	0.5	0	0
Day 8	15:30:00	0.625	0.8125	3.2	0	0	2.9	0.0625
Day 8	16:00:00	1.4375	0	1.4	2.25	0.1	3.8	0.4375
Day 8	16:30:00	1.875	0.375	1.8	0.375	0.3	2.1	1.75
Day 8	17:00:00	1.4375	1.3125	1.1	0.125	1.5	4.1	0.6875
Day 8	17:30:00	0	1.9375	0	0.1875	0.2	0.5	0.0625
Day 8	18:00:00	4.5	0.9375	2.7	0.5625	2.8	2.2	2.1875
Day 8	18:30:00	5.5625	1.875	3.4	1.875	0.5	1.9	2.4375
Day 8	19:00:00	0.8125	4.5	1.8	3	0	1.1	2.0625
Day 8	19:30:00	5.3125	6.0625	1.2	3.25	0.1	0.8	1.375
Day 8	20:00:00	3.75	5.3125	0.7	5.625	0.6	1.2	1.75
Day 8	20:30:00	3.4375	13.9375	6.9	3.375	2.7	0.7	8.1875
Day 8	21:00:00	4.1875	20.375	3	9.5625	0.6	4.3	3
Day 8	21:30:00	3.5	21.8125	4.7	6.0625	2.4	8.9	5.25
Day 8	22:00:00	7.625	17.25	8.6	13.5625	8.1	4	5.125
Day 8	22:30:00	4.8125	14.75	16.8	4.75	0	14.5	2.3125
Day 8	23:00:00	1.875	13.8125	8.3	10.625	0.5	12.5	11.625
Day 8	23:30:00	3.625	23.9375	10.8	6.5625	0.9	15.9	8.6875
Day 9	00:00:00	8.5625	17.9375	13.6	6.375	5.3	20.4	4.3125
Day 9	00:30:00	22.8125	46.5625	23.3	58.3125	23.8	39.1	30.5
Day 9	01:00:00	11.625	43.9375	21.1	53.4375	53	53.5	19.125
Day 9	01:30:00	13.25	26.4375	22.4	16.625	51.8	40	13
Day 9	02:00:00	16.6875	7.8125	19.5	7.125	42.2	35.5	9.6875
Day 9	02:30:00	20.375	6.625	13	6.75	36.9	29.9	17.9375
Day 9	03:00:00	28.5	5.25	20	5.625	24.2	18.5	13.3125
Day 9	03:30:00	29.4375	4.125	24.8	4.375	22.1	19.7	21.125
Day 9	04:00:00	27.25	2.0625	17.8	3.4375	19.5	28.5	15.4375
Day 9	04:30:00	30.1875	7.375	23.3	4.1875	26.4	24.4	23.5625
Day 9	05:00:00	24.4375	6.5625	24	9.625	18	22.1	46.25
Day 9	05:30:00	20.8125	12.8125	38.5	13.4375	23.9	23.7	54
Day 9	06:00:00	21.9375	20.9375	37.6	27	32.6	29.6	57.8125
Day 9	06:30:00	18.625	58.4375	51.8	40.8125	21.7	40.1	53.4375
Day 9	07:00:00	16.1875	72.6875	48.7	55.75	29.8	27.1	50.5
Day 9	07:30:00	16.6875	81.0625	54.3	66.375	33.5	30.5	49.5625
Day 9	08:00:00	14.3125	89.125	59.3	52.3125	40.2	36.8	44
Day 9	08:30:00	11.5625	80.3125	60.6	46	35.9	38.6	39.5625
Day 9	09:00:00	14.9375	83.1875	58.3	47.8125	47.1	38.9	38.8125
Day 9	09:30:00	9.0625	82.625	50.7	46.1875	40.8	36.1	34.875
Day 9	10:00:00	10.125	81.875	51.1	40.4375	45.3	43.1	32.3125
Day 9	10:30:00	7.6875	77.9375	49.9	29.75	48.7	44.1	26.5
Day 9	11:00:00	9.75	59.1875	42.6	27.125	42	45.2	22.125
Day 9	11:30:00	5.375	50.9375	39.8	29.5	43.6	34.2	18.3125
Day 9	12:00:00	8.6875	30.5	32.8	22.0625	48.6	31.7	18
Day 9	12:30:00	6.9375	13.1875	35.5	8.0625	33.2	12.9	14.3125
Day 9	13:00:00	2.4375	0	18.6	0.25	17.2	3.9	0.3125
Day 9	13:30:00	2.125	0	5.2	0.75	2.4	3	0.125
Day 9	14:00:00	0	0	7.2	0.5	0.2	5.4	0
Day 9	14:30:00	0	0.125	5.4	0	7.2	0.1	0.1875
Day 9	15:00:00	0.1875	1	3.3	0	6.3	2.6	0
Day 9	15:30:00	2.3125	0.125	1.1	0.4375	0	4.8	0.4375
Day 9	16:00:00	1.125	0.75	1.2	0.125	1.1	1.4	0.75
Day 9	16:30:00	0.1875	1.25	0	0	1	2.1	0.3125
Day 9	17:00:00	2.8125	1.3125	1.9	0	0.7	0.7	0.0625
Day 9	17:30:00	4.3125	3.875	1.6	0.125	6.4	2.4	0.0625
Day 9	18:00:00	2.875	4.6875	0	0	0.9	3.9	2.125
Day 9	18:30:00	5.5625	4.375	1.3	2.25	4	5.8	0.8125
Day 9	19:00:00	5.1875	2.25	3.8	4.25	8.1	0.1	2.1875
Day 9	19:30:00	3.5625	2.625	4.8	0.75	1.8	0.1	6.0625
Day 9	20:00:00	4.4375	6	2.4	1.4375	1.4	1.9	6.5
Day 9	20:30:00	3.375	13.8125	3.3	2.6875	1.4	3.8	14
Day 9	21:00:00	4.5625	18.625	4	3	1.5	4	6.875
Day 9	21:30:00	4.125	19.3125	9	10.875	0.2	15	2.8125
Day 9	22:00:00	4.1875	18.6875	8.4	5.0625	5.9	7.3	9
Day 9	22:30:00	2.9375	29.4375	7.9	2.375	0.9	9	6.6875
Day 9	23:00:00	4.4375	21.25	9.4	8.75	0.7	23.7	2.25
Day 9	23:30:00	4.5	12.375	9.7	1.75	8.2	26.9	6.9375
Day 10	00:00:00	7.625	7.4375	16	6.375	5.3	28.2	9.4375
Day 10	00:30:00	24.1875	50.4375	27.5	56.1875	27.7	42.5	29.375
Day 10	01:00:00	16.6875	49.3125	29.1	55.3125	43.3	36.6	21.25
Day 10	01:30:00	14.0625	29.875	22.4	13.1875	46.5	34.1	16.875
Day 10	02:00:00	11	13.3125	31	10.1875	43.1	30.9	15.9375
Day 10	02:30:00	15	2.6875	18.5	6.375	25.1	23.2	15.625
Day 10	03:00:00	27.75	0.25	17.7	6.5	34.1	18.7	10.4375
Day 10	03:30:00	24.6875	1.625	13.5	4.875	24	43.3	23.625
Day 10	04:00:00	28.1875	0.625	17.4	2.8125	19.1	29.8	20.875
Day 10	04:30:00	18.5	1	22.3	3.4375	23.1	29.3	51.5
Day 10	05:00:00	26.5625	3.3125	26.4	7	18.6	24.9	51.875
Day 10	05:30:00	20.375	10.25	37	8.4375	21.7	28.4	51.375
Day 10	06:00:00	21	24.125	33.9	22	29.5	34.7	47.3125
Day 10	06:30:00	18.1875	50.4375	41.9	40.5	25.8	27.9	51.6875
Day 10	07:00:00	18.1875	73	44	49.8125	28.7	36.2	50.875
Day 10	07:30:00	15.5625	76.5625	53.9	54.1875	36.1	35.1	45.3125
Day 10	08:00:00	12.375	73.1875	50.8	55.8125	39	32	40.3125
Day 10	08:30:00	11.8125	76.1875	56	53.8125	41	42	42.625
Day 10	09:00:00	11	76.9375	55.3	45	39.2	37.1	32.125
Day 10	09:30:00	12.0625	67.0625	54.5	42.75	39.1	40.9	31.375
Day 10	10:00:00	13.6875	69.6875	53	43.1875	43.8	36.1	27.375
Day 10	10:30:00	7.75	59.625	46.7	29	41	36.7	28.4375
Day 10	11:00:00	11.3125	50.125	47.8	26.375	41.5	35	28.6875
Day 10	11:30:00	5.8125	42.875	42	27.3125	41.9	39.3	17.375
Day 10	12:00:00	6.1875	23.5625	37	24.4375	37.4	33.4	19
Day 10	12:30:00	3.75	19	37.9	15.5625	38.1	9.5	11.75
Day 10	13:00:00	1.0625	2.75	13.6	0	22.8	2.5	0
Day 10	13:30:00	1.5625	1.25	5.7	0	11.7	3.9	0
Day 10	14:00:00	1	1	1.3	0	6.6	0.6	0
Day 10	14:30:00	0.3125	0.0625	3.7	1.1875	0.7	1	0
Day 10	15:00:00	0.4375	2.4375	3.5	0.5625	0.5	1.4	0.75
Day 10	15:30:00	3.875	0.5	3.7	0.3125	0	0.3	0
Day 10	16:00:00	0.75	4.875	1.6	0.3125	1.9	0.5	0.0625
Day 10	16:30:00	0	3.8125	5	0.3125	0	0	0
Day 10	17:00:00	0.3125	1.5	1.1	0.4375	0.2	0	0.1875
Day 10	17:30:00	3.6875	3.875	5.8	0.375	0	0	2.25
Day 10	18:00:00	3.375	1.25	2.3	0.125	0	1.3	8.1875
Day 10	18:30:00	2.125	5.6875	2.9	0.5	0.1	1.2	5.3125
Day 10	19:00:00	2.875	8.375	4.1	1.1875	0.3	0.8	5.5
Day 10	19:30:00	1.25	15	0	2.5	4.9	6.3	2.5625
Day 10	20:00:00	1.625	15.8125	0.6	7.5625	1.4	4.6	8.4375
Day 10	20:30:00	4.3125	14.4375	3.8	3.4375	1.1	3.6	6
Day 10	21:00:00	3.25	13.125	4.8	11	2	5.5	8.3125
Day 10	21:30:00	1.5	20	8.4	3.875	0.9	9	6.125
Day 10	22:00:00	1.125	23.9375	11.1	5.5625	2.2	14.9	9.75
Day 10	22:30:00	3.25	20.4375	11.4	4.75	2.5	13.9	11.5
Day 10	23:00:00	5.4375	12.125	12.3	11	2.7	21	7.75
Day 10	23:30:00	6.5625	17.4375	13.1	8.875	4.5	23.4	2.375

## Sheet: Fig 5 D E Experiment 2
		PsiRNAiKK/+	tim0,TG4/tim0,PsiRNAiKK; UAS-Dcr2/timHA	TG4/PsiRNAiKK; UAS-Dcr2/+	TG4/+; UAS-Dcr2/+	tim0,TG4/tim0; UAS-Dcr2/timHA	w1118	tim0,PsiRNAiKK/tim0; timHA/+
Day 7	00:00:00	11.25	5.6875	7.26667	13.8235	19.875	20.125	30.1667
Day 7	00:30:00	80.375	52.25	45.6667	72.4706	72.625	112.062	56.75
Day 7	01:00:00	46.75	25.25	26.2667	50.1765	51.9375	50.0625	49.1667
Day 7	01:30:00	12.4375	7.8125	2.53333	21	40.0625	14.875	31.0833
Day 7	02:00:00	11.875	3.875	3.46667	11.7647	40.625	6.125	22.6667
Day 7	02:30:00	11.9375	10.4375	11.6	11.2941	30.5625	4.5625	23.5
Day 7	03:00:00	5.6875	8.375	2.2	4.82353	23.4375	7.8125	17.3333
Day 7	03:30:00	2	5.875	5.93333	1.94118	17.1875	0.0625	20.0833
Day 7	04:00:00	1.9375	4.25	2.46667	1.82353	15.3125	1.0625	14.4167
Day 7	04:30:00	2.25	6.25	2.33333	2.94118	12.6875	3.4375	7
Day 7	05:00:00	1.9375	5.75	7.73333	0	7.875	0.875	4.75
Day 7	05:30:00	0.125	11.1875	16.4667	2.41176	5.9375	0	8.41667
Day 7	06:00:00	0.0625	25.875	40.7333	1.35294	9.4375	0.875	10
Day 7	06:30:00	3.25	24.9375	34.9333	0.941176	2.5625	0.3125	11.1667
Day 7	07:00:00	11.8125	40.375	42.0667	2.23529	9.4375	0.0625	10.0833
Day 7	07:30:00	8	40.375	32.5333	5.17647	11.9375	0	13.9167
Day 7	08:00:00	16.4375	44.875	26.6667	0.764706	26.3125	5.6875	24.9167
Day 7	08:30:00	39.3125	53.6875	24.8	5	35.875	10.0625	35.5833
Day 7	09:00:00	58.125	56.8125	30.7333	14.9412	43	22.5625	49.25
Day 7	09:30:00	55.6875	55.9375	15.6	39.4118	51.75	47.5625	47.8333
Day 7	10:00:00	56.5625	51.625	15.8667	52.0588	51.375	65.4375	50.1667
Day 7	10:30:00	42.625	51.25	18.0667	58.7647	48.75	86.125	53
Day 7	11:00:00	32.1875	39.1875	6.26667	62.2941	46.9375	98.4375	49.4167
Day 7	11:30:00	33.875	41	8.53333	61.8824	49.125	94.375	42.9167
Day 7	12:00:00	27.8125	25.25	7.4	58.9412	46.6875	93.4375	41.25
Day 7	12:30:00	11.5625	42.5625	4.26667	43.1765	56.75	46.6875	54.4167
Day 7	13:00:00	0	19.0625	5.46667	4.05882	22.8125	13.75	13.5833
Day 7	13:30:00	0.3125	3.3125	0	1.94118	4.25	4.875	4.25
Day 7	14:00:00	0	0.75	0	0	0.25	1.0625	2.16667
Day 7	14:30:00	0.125	1.125	1.13333	1.05882	0.625	3.1875	1.58333
Day 7	15:00:00	1.125	4	1.33333	1	1.4375	6.5625	3.83333
Day 7	15:30:00	1.25	1.625	1.06667	0.529412	0.75	2.1875	5.25
Day 7	16:00:00	0.875	0	1.2	2.64706	1.5	2.125	0
Day 7	16:30:00	0.5625	0.25	2.4	0.529412	6.8125	6	0.75
Day 7	17:00:00	2.3125	3.1875	0.866667	1.17647	1.4375	5.8125	0.0833333
Day 7	17:30:00	2.75	1.125	1.66667	2.17647	0.9375	4.0625	1.41667
Day 7	18:00:00	4.75	1.4375	1.33333	3.47059	1.125	6.5625	0.166667
Day 7	18:30:00	0.375	1.4375	2.73333	3.88235	0.125	22.1875	1.25
Day 7	19:00:00	4.3125	2.125	3.2	2.52941	0.75	12.1875	1.83333
Day 7	19:30:00	4.125	0.6875	6.8	4.76471	1.5625	12.875	3.16667
Day 7	20:00:00	10.5	5.1875	9.73333	2.41176	1.1875	22.6875	6.41667
Day 7	20:30:00	5.625	7.4375	7.66667	8.05882	1.1875	29.6875	11.0833
Day 7	21:00:00	6.0625	7	4.46667	16.4118	2.1875	38.5625	8.25
Day 7	21:30:00	14.5	4.1875	8.6	25.7647	1.6875	46.9375	9.16667
Day 7	22:00:00	19.3125	6.625	6.53333	24.3529	7.8125	34.4375	14
Day 7	22:30:00	16.6875	7.25	6.66667	10.4706	4.625	46.875	17.4167
Day 7	23:00:00	9.8125	11.8125	7.4	9.76471	4.0625	34.4375	25.25
Day 7	23:30:00	10.4375	14.6875	8.8	18.5294	6.3125	22.5	30.6667
Day 8	00:00:00	14.0625	8.3125	4.13333	22	11.0625	31.3125	34.0833
Day 8	00:30:00	79.6875	49.25	46.3333	69.2353	68.8125	107.75	63.0833
Day 8	01:00:00	37.8125	27.75	25.1333	40.8235	56.4375	52.4375	47.75
Day 8	01:30:00	13.9375	10.8125	3.2	28.4118	47.5	15.5625	29
Day 8	02:00:00	13.875	5.25	9.93333	9.70588	32.6875	2.75	30
Day 8	02:30:00	12.5	6.3125	4	11.1765	31.75	4.5	23.75
Day 8	03:00:00	5.5625	11.5625	7.93333	7.70588	27.625	1	21.1667
Day 8	03:30:00	8.1875	3.875	7.46667	8.47059	17.5	1.1875	21.5
Day 8	04:00:00	7.875	10	1.66667	2	25.875	1.75	12.6667
Day 8	04:30:00	3.5	6.1875	1.8	0.647059	8.6875	0.75	9.25
Day 8	05:00:00	0.3125	8.75	7.53333	1.05882	5.3125	0.0625	7.58333
Day 8	05:30:00	0.3125	9	14.8667	0.529412	8	0.1875	8.41667
Day 8	06:00:00	1.1875	21.3125	29.2	1.05882	4.875	0.0625	5.66667
Day 8	06:30:00	2.875	23.5	32.7333	0.941176	5.0625	0.4375	6.33333
Day 8	07:00:00	6.6875	36.375	33.8	0.647059	4.5625	1.75	12.3333
Day 8	07:30:00	13.5	42.6875	38.4	1.05882	19.375	3.8125	19.25
Day 8	08:00:00	18.25	45.625	30.4667	1.17647	26.375	3.9375	25.8333
Day 8	08:30:00	37.3125	46.4375	22.4	0.176471	34.8125	9.875	32.8333
Day 8	09:00:00	57.875	50.75	25.8667	7.70588	38.4375	16	39.75
Day 8	09:30:00	49.875	49.8125	13.8667	26.9412	49	50.5	49.5
Day 8	10:00:00	43.5625	50.625	14.1333	38.2353	46.25	58.625	48.4167
Day 8	10:30:00	38.0625	43.875	11.2	43.0588	45.4375	76.625	48.6667
Day 8	11:00:00	33.9375	33.25	8.66667	57.7059	48.5	80.5	45.4167
Day 8	11:30:00	36.125	31	11.5333	52.4706	45.6875	85.375	40.1667
Day 8	12:00:00	22.625	20.5	4.66667	51.2353	45.125	75	44.4167
Day 8	12:30:00	9	37.75	9.73333	45	59.375	52.25	41.6667
Day 8	13:00:00	0.4375	19.3125	7.86667	5.82353	22	19.5	16.6667
Day 8	13:30:00	0	3.0625	1.4	0.176471	3.375	10.8125	13.8333
Day 8	14:00:00	0	6.125	2.86667	0.470588	1.5	3.0625	1.08333
Day 8	14:30:00	1.1875	2.5	0.733333	0.764706	1.25	11.4375	0.666667
Day 8	15:00:00	2.0625	6.25	0.0666667	0.705882	0.6875	6.375	8.66667
Day 8	15:30:00	0.5625	2.3125	0.466667	1.52941	1.375	5.3125	1.16667
Day 8	16:00:00	0.9375	4.75	0.266667	0.352941	1.5	6.375	0.0833333
Day 8	16:30:00	1	3.0625	0	0.705882	0.5	2.875	0.0833333
Day 8	17:00:00	1	1.375	2	1.70588	0.6875	5.3125	0.916667
Day 8	17:30:00	2.4375	0.0625	1.06667	1.41176	2.625	4.6875	12
Day 8	18:00:00	1.5625	2.3125	1.2	3.11765	0.875	11.25	6.5
Day 8	18:30:00	1.3125	0.25	2.33333	9.76471	3.5	12.5	0.916667
Day 8	19:00:00	3.25	0.25	3.53333	2.64706	4.8125	12.25	0.166667
Day 8	19:30:00	3.1875	0.3125	5.66667	4.94118	1.125	12.75	0.416667
Day 8	20:00:00	3.6875	3.5625	6.33333	6	0.4375	30.5625	0.0833333
Day 8	20:30:00	7.25	0.9375	5	19.7647	1.5	28.375	1.33333
Day 8	21:00:00	13	4.125	1.93333	22.4706	2.5625	39.125	6.41667
Day 8	21:30:00	15.3125	3.5625	4.53333	18.0588	4.0625	47.75	6.41667
Day 8	22:00:00	14.25	7.125	5.53333	23.1176	2.3125	54.5625	18.5
Day 8	22:30:00	22.8125	7.4375	3.86667	16.7647	10.125	47.5625	12.5833
Day 8	23:00:00	6.9375	12.625	2.8	14.3529	3.25	27.875	12.3333
Day 8	23:30:00	11.625	8.0625	2.4	17	11.9375	24.4375	28.8333
Day 9	00:00:00	13.375	8	9.86667	18.7647	14.125	26.6875	24.5
Day 9	00:30:00	78.3125	42.625	47.2667	67.6471	67	101.75	51.6667
Day 9	01:00:00	35.25	26.375	23.3333	44.1176	46.9375	35.125	46.5
Day 9	01:30:00	15.75	9.625	4.86667	17.9412	43.1875	5.625	37.0833
Day 9	02:00:00	12.125	8.125	4.26667	10.6471	33.75	0.5625	21.8333
Day 9	02:30:00	10.5	5.9375	8.46667	5.41176	25.375	2.125	19.0833
Day 9	03:00:00	10.25	8.4375	4.26667	9.88235	27.625	1	26.5833
Day 9	03:30:00	0.25	13.0625	4.46667	2.05882	17.375	0	16.5833
Day 9	04:00:00	3.4375	4.5625	3	3.17647	18.3125	0	9.33333
Day 9	04:30:00	9.3125	4.6875	3.93333	2.94118	16.25	0.1875	10.25
Day 9	05:00:00	1.5625	4.5625	5.06667	0.294118	9.0625	0	11.1667
Day 9	05:30:00	0	3.9375	9.66667	1.47059	7.6875	0.0625	6.75
Day 9	06:00:00	0	18	31.7333	0.705882	4	0	6.08333
Day 9	06:30:00	4.3125	24.6875	31.6667	0.529412	4.5625	0	3.16667
Day 9	07:00:00	5.4375	30.6875	28.2	0	6.5	0	8.08333
Day 9	07:30:00	9.5	40.0625	30.7333	0.823529	18.0625	0	19.9167
Day 9	08:00:00	31.1875	46.25	27.5333	1.05882	22.4375	5.5625	31.4167
Day 9	08:30:00	40.8125	44.9375	21.7333	3.29412	30.9375	6.3125	32.6667
Day 9	09:00:00	55.25	47.0625	19.4667	8.41176	48.1875	10.3125	40.6667
Day 9	09:30:00	50.9375	49.0625	11.6	23.3529	50.875	33.3125	43.1667
Day 9	10:00:00	35.6875	46.6875	19.2667	27.9412	43.1875	65.625	52.75
Day 9	10:30:00	39.1875	37.5625	14.5333	38.9412	39.8125	64.75	44.9167
Day 9	11:00:00	31.0625	33.1875	9	51	53.75	76	45.3333
Day 9	11:30:00	28.0625	31.8125	8	46.2941	40.625	76.5625	42.6667
Day 9	12:00:00	26.4375	18.625	10.7333	40	37.3125	69.0625	42.75
Day 9	12:30:00	8.8125	30.8125	6.13333	35.6471	51.1875	43.5	44.8333
Day 9	13:00:00	4.875	12.9375	6.26667	6.52941	21.25	4.4375	15.6667
Day 9	13:30:00	0.5	3.75	1.8	3.29412	5.75	1.25	6.16667
Day 9	14:00:00	0.5	2.25	0.866667	2.94118	1.3125	12	2.75
Day 9	14:30:00	0.4375	5.375	1.93333	0	0.125	8.75	3.08333
Day 9	15:00:00	1.375	3.375	0.933333	1.17647	0.5625	4.5625	1.75
Day 9	15:30:00	0.125	2.6875	1.2	0.588235	1.9375	0.5	0.0833333
Day 9	16:00:00	1.75	3.8125	1.8	2.29412	1.4375	6.125	3.58333
Day 9	16:30:00	0.9375	1.75	0.4	0.647059	2.6875	5.875	1
Day 9	17:00:00	0.75	1.8125	0.733333	1.64706	0.625	4.8125	0
Day 9	17:30:00	1	1.75	1.66667	0.0588235	1.5625	9.875	0
Day 9	18:00:00	2.1875	0	2.86667	2.17647	3.4375	18.1875	0
Day 9	18:30:00	1.9375	0.6875	0.8	3.47059	0.875	8.75	0.25
Day 9	19:00:00	1.5	0.375	1.8	6.11765	1.375	15.75	1.58333
Day 9	19:30:00	2.3125	3.6875	3.46667	5.23529	2.375	16.625	1.08333
Day 9	20:00:00	4.25	4.25	3.86667	8.76471	1.3125	19.8125	4.58333
Day 9	20:30:00	8.8125	1.875	5.86667	14.1176	2.125	23.375	3.5
Day 9	21:00:00	14.6875	1	4.73333	11.6471	5.3125	33.625	8.91667
Day 9	21:30:00	19.0625	4.125	11.3333	21.7059	2.6875	37.3125	3.66667
Day 9	22:00:00	6.625	5.6875	4.66667	15.9412	2.5	34.4375	7.41667
Day 9	22:30:00	10.0625	5.4375	4.06667	21.5294	6.75	34	21.6667
Day 9	23:00:00	15.5625	3.375	4.13333	12.5882	6.625	48.1875	21.25
Day 9	23:30:00	7.1875	6.9375	4.26667	20.7647	6	44.6875	25.9167
Day 10	00:00:00	10	9.6875	7.33333	16.1176	8.875	32.8125	29.6667
Day 10	00:30:00	69.8125	42.8125	46.5333	63.9412	64.25	90.8125	58.25
Day 10	01:00:00	30.5	28.9375	17.2667	39.1176	49	33.6875	46.6667
Day 10	01:30:00	10.5625	16.25	2.13333	5.52941	37.625	9.8125	33.1667
Day 10	02:00:00	17.8125	16.3125	2.33333	10.6471	29.125	0.6875	29.6667
Day 10	02:30:00	26.375	10.5	8.46667	9.94118	29.0625	2.125	27.6667
Day 10	03:00:00	9.0625	10.3125	4.73333	9.64706	22.625	4	16.6667
Day 10	03:30:00	3.1875	4.25	4.66667	8.41176	19.625	2.75	20.3333
Day 10	04:00:00	4.0625	2.5	4.6	5.52941	13.8125	0	15.25
Day 10	04:30:00	1.6875	12.25	3.6	1.29412	17.1875	0	8.08333
Day 10	05:00:00	0.9375	7.0625	1.8	0.0588235	10.625	0.1875	5.66667
Day 10	05:30:00	1.75	8.6875	13.4667	2	6.6875	0	5
Day 10	06:00:00	0.375	9.8125	18.9333	0.411765	3.6875	0	3
Day 10	06:30:00	4.125	17.75	22.7333	0.882353	3.1875	0	2.33333
Day 10	07:00:00	4.3125	28.6875	28.1333	3.05882	4.5	0	4.83333
Day 10	07:30:00	13.125	40.1875	23.9333	1.47059	9.6875	0	27.75
Day 10	08:00:00	28.8125	40.6875	12.6	1.76471	26.9375	0	19.9167
Day 10	08:30:00	31.8125	42	14.3333	3	35.125	5.3125	33.75
Day 10	09:00:00	47.5	42.6875	15.6667	7.05882	36.9375	7.625	40.4167
Day 10	09:30:00	42.75	39.5625	15.2	16.7647	44.3125	25.5	43.5
Day 10	10:00:00	37.0625	40.5	14.2667	22.2941	37.125	43.75	42.75
Day 10	10:30:00	32.3125	36.75	8.26667	35.1765	38.3125	57.875	41.5
Day 10	11:00:00	29.6875	28.5	10.6667	41.7647	42.9375	67.125	41.5
Day 10	11:30:00	28.25	30.5625	8.53333	36.7647	38.3125	65.375	37.5833
Day 10	12:00:00	22.6875	21.6875	6.66667	37.5294	34	58.75	31.6667
Day 10	12:30:00	13.125	35	14.8	40.1176	45.9375	51.25	32.0833
Day 10	13:00:00	4	17.1875	12.6	13.5294	17.1875	20.1875	8.41667
Day 10	13:30:00	1.6875	0.6875	2.06667	0.117647	3.1875	16.5625	7.66667
Day 10	14:00:00	0.6875	3.6875	2.93333	0.647059	2.5625	5.6875	5.08333
Day 10	14:30:00	0.8125	3.625	5.33333	0.882353	0.25	1.625	2
Day 10	15:00:00	1.8125	4	0.266667	0.294118	0.6875	1.8125	6.16667
Day 10	15:30:00	7.75	1.8125	0.4	0	2.25	5	6.66667
Day 10	16:00:00	2.5	0.875	0.2	3.35294	2.8125	2.25	2.08333
Day 10	16:30:00	3.125	2	0.266667	0.823529	3.6875	6.9375	0
Day 10	17:00:00	2.875	3.3125	0.2	2.23529	6.0625	5.5	0
Day 10	17:30:00	3.6875	1.5625	0.333333	2.76471	0.5	5.0625	0
Day 10	18:00:00	2.1875	1.125	1.26667	1	1.6875	5.75	2.41667
Day 10	18:30:00	3.4375	0.5	0.466667	0.529412	1.6875	6.0625	0.333333
Day 10	19:00:00	3.25	1.5625	2.4	3.52941	1.75	8.3125	1.33333
Day 10	19:30:00	6	0.1875	2.13333	1.82353	1.125	14.5	6.66667
Day 10	20:00:00	4.8125	0.6875	4.86667	7.64706	1.9375	11.6875	5.83333
Day 10	20:30:00	11.8125	1.5625	5.13333	8.58824	2.5625	11.0625	8.41667
Day 10	21:00:00	15.9375	2.625	4.6	15.1176	3.875	27.5	4.41667
Day 10	21:30:00	10	1.5	3.06667	11.2941	6.6875	42.5625	5.91667
Day 10	22:00:00	8.25	5.75	2.46667	10.7059	5.4375	31.75	13.1667
Day 10	22:30:00	13.3125	3.875	5.06667	14.9412	5.8125	40.6875	13.1667
Day 10	23:00:00	13.25	4.5625	3.33333	19.0588	8.3125	31.8125	18.5833
Day 10	23:30:00	10.0625	5.8125	5.93333	16.7647	6.125	24.0625	23.6667

## Sheet: Fig 5 D E Experiment 3 
		TG4/+; UAS-Dcr2/+	tim0,TG4/tim0,PsiRNAiKK; UAS-Dcr2/timHA	w1118	tim0,TG4/tim0; UAS-Dcr2/timHA	tim0,PsiRNAiKK/tim0; timHA/+	TG4/PsiRNAiKK; UAS-Dcr2/+	PsiRNAiKK/+
Day 7	00:00:00	18.3125	5.4375	30.2	15.9375	22.6	8.75	8.06667
Day 7	00:30:00	88.4375	57.125	75.5333	83.1875	79.6	41.8125	66.2
Day 7	01:00:00	18.1875	15.6875	37.4	76.0625	50.2	9.625	12.4
Day 7	01:30:00	14.5	11.1875	15.8667	51.5	28.2	8.875	13.1333
Day 7	02:00:00	6.4375	8.5	15.6667	33.6875	13.4	9.625	0.8
Day 7	02:30:00	12.25	8.875	12.8	32.375	14.6	16.625	3.6
Day 7	03:00:00	4.5625	11.9375	5.66667	29.1875	7	23.1875	3.06667
Day 7	03:30:00	5.6875	13.1875	8.33333	18.375	5	46.0625	2.26667
Day 7	04:00:00	13.1875	20.0625	2.86667	17.1875	10.6	44.5625	3.2
Day 7	04:30:00	7.6875	16.4375	1.53333	8.6875	2.6	42.25	3.13333
Day 7	05:00:00	18.25	23.1875	1.46667	8.6875	6.2	34.375	10.9333
Day 7	05:30:00	33.375	27.0625	2.46667	7.875	27.6	32.125	16.4
Day 7	06:00:00	49.25	37.75	10.4	9.375	20.6	30.6875	22.7333
Day 7	06:30:00	84	32.9375	14.2667	16.9375	46.6	30.0625	31.4667
Day 7	07:00:00	94.8125	49.5	21.4667	31.6875	36.6	25.3125	50.6667
Day 7	07:30:00	89.625	49.625	50.8667	42.125	41.4	15.375	50.6
Day 7	08:00:00	93.9375	58.3125	56.2	55.625	51.2	20.5625	56.1333
Day 7	08:30:00	91.9375	60.625	75.6	55	44	19.25	52.8667
Day 7	09:00:00	94.125	62.9375	80.6667	66.6875	45.6	8.5625	52
Day 7	09:30:00	93.1875	58.5625	75.5333	69.4375	44.4	8.6875	53.9333
Day 7	10:00:00	87.75	62.5	72.0667	66.75	40.2	13.8125	42.9333
Day 7	10:30:00	86.0625	53.125	75.2	78.8125	47	8	51.2667
Day 7	11:00:00	91.625	45.4375	68.7333	73	44	8.125	40.4667
Day 7	11:30:00	93.875	36.125	68	75.0625	37.4	8.625	42.8667
Day 7	12:00:00	92.4375	30.8125	50.5333	78	39.6	13.1875	27.4667
Day 7	12:30:00	40.25	49	20.6667	68.25	24.6	4.6875	18.8667
Day 7	13:00:00	1.4375	1.875	3.53333	15.75	1	0.75	3.86667
Day 7	13:30:00	2.1875	0.1875	6.93333	3.25	0	0.5	3.2
Day 7	14:00:00	0.625	0	1.46667	11.3125	0	0	0.2
Day 7	14:30:00	4.125	4.6875	1.33333	8.875	0	0.1875	0
Day 7	15:00:00	0	0.3125	1.93333	5.0625	0	0.5625	0
Day 7	15:30:00	0	0.5625	7.6	3.25	0	10.0625	0.933333
Day 7	16:00:00	0.9375	0	3.66667	1.875	0	0.8125	0.666667
Day 7	16:30:00	0.375	0.8125	5.86667	6.3125	0	8.9375	1.4
Day 7	17:00:00	4.1875	0	3.73333	4.125	0	3.4375	3.2
Day 7	17:30:00	0.6875	0	9.13333	2.125	0	1.8125	2.8
Day 7	18:00:00	2.5	0	12.4667	0.1875	0	4.5	7.8
Day 7	18:30:00	2.25	0	13.2	1.125	0.6	15.8125	3.66667
Day 7	19:00:00	4.5	0	7.86667	4.8125	0	19.8125	4.86667
Day 7	19:30:00	9.3125	1.5	17.0667	0.9375	0.8	3	14.4
Day 7	20:00:00	12.125	4.875	24.8667	5.5625	2.4	5.5	5.86667
Day 7	20:30:00	15.5	2.9375	29.7333	12.9375	8.8	2.9375	6.93333
Day 7	21:00:00	27.3125	3.9375	38.2667	2.0625	12.6	4.5	9.8
Day 7	21:30:00	16.625	13.0625	33.4	5.25	22.4	0.625	11.4667
Day 7	22:00:00	19.5625	9.8125	22.0667	15	19	0.6875	14.6
Day 7	22:30:00	22.5	5.6875	29.2	12.875	18.4	2.375	14.8
Day 7	23:00:00	19.1875	9.125	36.9333	16.1875	18.4	5	10.4667
Day 7	23:30:00	21.9375	9.0625	22.4667	20.9375	18.4	4	9.06667
Day 8	00:00:00	8.8125	8.125	20.6	22.1875	12.8	7.5	2.26667
Day 8	00:30:00	88.375	59.625	88.6667	85.4375	74.6	46.5	64.6
Day 8	01:00:00	25.1875	14.5	44.6	84.375	41	13.625	12.2667
Day 8	01:30:00	17.5625	12.6875	11.6667	62.3125	31	5.6875	11.1333
Day 8	02:00:00	19.8125	11.6875	10.4	53.5	23	5.9375	2.13333
Day 8	02:30:00	10.25	7.4375	4.53333	42.5625	18	22.6875	0
Day 8	03:00:00	10.875	9.375	4.2	38.5625	4.8	39.5	6.73333
Day 8	03:30:00	2.5625	4.375	0.733333	23.6875	5.8	43.8125	2.93333
Day 8	04:00:00	5.0625	7.9375	3.6	14.125	7.6	42.25	5.6
Day 8	04:30:00	14.4375	8.4375	0.133333	16.75	4.4	45.6875	9.46667
Day 8	05:00:00	16.8125	28.0625	0.2	11.25	25.4	31.0625	4.33333
Day 8	05:30:00	10.9375	31.4375	1.66667	10.75	11.4	26.875	25.6667
Day 8	06:00:00	26.375	25.25	6.46667	15.4375	21.4	26.75	36.4667
Day 8	06:30:00	61.9375	44.6875	8.13333	18.1875	22.4	20.9375	40
Day 8	07:00:00	94.3125	43.1875	27.9333	24.375	42.6	21.75	56.9333
Day 8	07:30:00	84.75	49.625	51.0667	38.875	50.6	18.875	57.7333
Day 8	08:00:00	88.125	49.6875	66.0667	45.625	48.4	14.125	53.2
Day 8	08:30:00	94.4375	55.75	65.7333	56.75	37	12.8125	52.4
Day 8	09:00:00	93.375	59.9375	70.9333	54.5625	42.4	11.5	46.6667
Day 8	09:30:00	93.25	55.5	70.5333	67.375	39.6	9	52.9333
Day 8	10:00:00	93.625	52.75	67.4	63	40.4	11.75	42.4
Day 8	10:30:00	90.4375	52.8125	67.6	76.6875	42.6	11.75	41.7333
Day 8	11:00:00	90.625	45.125	62.4667	70.25	37	11.25	34.1333
Day 8	11:30:00	89.5	41.9375	46.8667	78.8125	33.4	9.25	26.4667
Day 8	12:00:00	83.5	32	38.6667	66.3125	30.2	11.75	22.8667
Day 8	12:30:00	33.875	50.75	12.5333	65.9375	31.8	7.6875	11.6667
Day 8	13:00:00	1.9375	1.5	2.73333	13.125	7.6	0	4.13333
Day 8	13:30:00	0.8125	0.375	3.06667	4.125	0	0	0.666667
Day 8	14:00:00	0.75	0.0625	1.8	3.125	0	0.125	0.133333
Day 8	14:30:00	0.8125	0.9375	0	0.4375	0	0	0.666667
Day 8	15:00:00	2.25	1.5	1	3.625	0	1.1875	0
Day 8	15:30:00	2.5625	0.4375	6.13333	10.625	0	0.0625	2.2
Day 8	16:00:00	1.25	1.625	2.73333	4.8125	0	0.4375	0
Day 8	16:30:00	0.3125	0.5	1.53333	0.4375	11.6	5.875	0.266667
Day 8	17:00:00	1.125	1.375	4.06667	0	5.8	8.75	8.73333
Day 8	17:30:00	6.6875	0.9375	6.2	0.8125	0	4.3125	2.66667
Day 8	18:00:00	1.4375	1.75	16.3333	0.1875	0	5.125	1.73333
Day 8	18:30:00	3.4375	0	12.1333	4.8125	3	16.25	5.66667
Day 8	19:00:00	3.25	0.4375	10.1333	2.4375	0	13.875	4.4
Day 8	19:30:00	4.5	0.375	9.2	0.875	3	6.5625	4.53333
Day 8	20:00:00	8.875	1.8125	7.13333	1.875	11.8	4.25	14.4
Day 8	20:30:00	6.6875	2	23.8667	2.25	8.2	9.5625	19.4
Day 8	21:00:00	17.4375	6.125	29.2667	8.25	9.4	3.375	8.73333
Day 8	21:30:00	28.5625	12.9375	37.8	13.75	17.8	0.5	11.4
Day 8	22:00:00	16.25	8.5625	36.6667	20.875	11.8	8.0625	8.73333
Day 8	22:30:00	23.625	14.0625	25.6667	15.4375	25.2	3.25	7.66667
Day 8	23:00:00	16.5	3.0625	21.0667	29.8125	10.4	4.375	8.46667
Day 8	23:30:00	16.625	7.5625	15.0667	23.75	41.2	8.9375	11.3333
Day 9	00:00:00	11	5.4375	22.4	24.3125	11	5.5	9.2
Day 9	00:30:00	80.3125	49.125	74.2667	89.6875	62	50.875	64.4667
Day 9	01:00:00	22.875	10.625	32.6667	74.375	43.8	5.9375	21.2667
Day 9	01:30:00	15.25	9.125	16.4	57.875	18.6	1.0625	4
Day 9	02:00:00	20.625	13.8125	6.66667	45	29.8	8.125	7
Day 9	02:30:00	14	7.3125	4	39.125	8.4	15.25	2
Day 9	03:00:00	10.375	10.0625	3.66667	37.6875	7.4	34.6875	4.06667
Day 9	03:30:00	5	9.125	3.26667	25.875	20.2	35	3.53333
Day 9	04:00:00	15.375	11.3125	2.33333	20.375	18.2	37.3125	3.26667
Day 9	04:30:00	13.1875	23.3125	1.2	14.25	6.4	44.8125	11.2
Day 9	05:00:00	14.125	20.5	1.26667	16.375	19.2	26.5	17.3333
Day 9	05:30:00	9.1875	34.3125	0.6	8.375	9	30.4375	32.8
Day 9	06:00:00	22.75	32.4375	3.86667	12.875	22	27.5	43.8
Day 9	06:30:00	59.125	38.6875	11.5333	19.375	44.2	17.6875	47.4667
Day 9	07:00:00	87	42.5625	17.8	33	29.6	20.6875	42.8
Day 9	07:30:00	83.5625	51.125	40.5333	39.125	47.4	19.375	56.2
Day 9	08:00:00	90.8125	49.8125	66.8	57.6875	38.2	19.125	57.0667
Day 9	08:30:00	93.0625	61.6875	67.7333	52.4375	39	10.5625	55.8667
Day 9	09:00:00	92.5625	56.5625	60.7333	58.4375	35.4	5.8125	41.4
Day 9	09:30:00	86.625	56.8125	58.6	66.3125	38.4	15.375	38.1333
Day 9	10:00:00	93.375	57.1875	59.2667	65.375	35.8	10.375	37.4667
Day 9	10:30:00	89.4375	52.0625	57.8667	67.125	31.2	16.25	35.6667
Day 9	11:00:00	81.625	45.6875	46.2667	75.3125	35.8	5.5625	24.4
Day 9	11:30:00	93	34.5625	39.6	75	28.6	8.4375	21.6
Day 9	12:00:00	77.375	31.4375	28.8667	72.6875	18	6.375	22.0667
Day 9	12:30:00	36.3125	50.125	19.1333	74	32.2	11.8125	20
Day 9	13:00:00	3.75	3.1875	9.8	15.3125	4	0	5.06667
Day 9	13:30:00	0	0.5	5.33333	6.0625	0	1	0.866667
Day 9	14:00:00	0.125	1.625	0.533333	1.75	0	0.125	0
Day 9	14:30:00	0	0.3125	1.66667	0.5	0	0.1875	0
Day 9	15:00:00	0.125	0.5	4.06667	1.4375	0	0.1875	0
Day 9	15:30:00	0.375	1.4375	2.46667	2.1875	0	1.875	0
Day 9	16:00:00	0.75	1.625	0.733333	7	0	8.4375	0.666667
Day 9	16:30:00	0.3125	0.8125	5.26667	4.125	0	8.6875	0.0666667
Day 9	17:00:00	1.25	1.1875	9.26667	0.75	0	4.5	2.6
Day 9	17:30:00	1.9375	1.9375	4.53333	0.1875	1.8	6.5	0.666667
Day 9	18:00:00	4.0625	2.8125	4.93333	2.6875	0	3.3125	0.333333
Day 9	18:30:00	4.9375	0.125	11.2	0.5625	0	24.4375	5.93333
Day 9	19:00:00	7.0625	0.125	18.4667	3.8125	0	8.4375	14.2667
Day 9	19:30:00	4.9375	0.125	11.4	2.5625	0	10.75	9.26667
Day 9	20:00:00	10	4.25	14.5333	7.375	8.4	1.9375	4
Day 9	20:30:00	16.8125	1.5625	22.5333	0.9375	14.6	5	8.06667
Day 9	21:00:00	6.25	6.1875	26.6667	4.9375	12.6	9.1875	3.06667
Day 9	21:30:00	13.5	5.25	31.2667	10.625	19.6	5.5	8.53333
Day 9	22:00:00	11.625	7.5625	24.2	9.1875	12	3.5	10.3333
Day 9	22:30:00	16.375	6.1875	26.1333	10.375	16.8	3.875	5.93333
Day 9	23:00:00	13.8125	13.8125	21.1333	24.4375	34.4	4	5.8
Day 9	23:30:00	15.375	7.25	21.7333	23.75	17	2.5	7.46667
Day 10	00:00:00	16.6875	10.125	13.3333	13.125	28.8	1.5	4.06667
Day 10	00:30:00	79.875	50.75	66.8	75.625	63.6	36.875	71.6
Day 10	01:00:00	21.375	16	23.8	91.8125	32.8	8.5	18.7333
Day 10	01:30:00	23.8125	12	8.8	60.25	28.6	3.375	13.2667
Day 10	02:00:00	14.875	7.625	5	49.125	13.2	9.0625	9.2
Day 10	02:30:00	12.6875	8.3125	5.33333	34.5625	17.8	11.875	5.06667
Day 10	03:00:00	14.25	7.5625	3.26667	26.5625	6.8	27.375	6.53333
Day 10	03:30:00	12	12.6875	2.6	22	5	32.5625	4.13333
Day 10	04:00:00	13	9.375	3.13333	23.625	6	37.1875	4.33333
Day 10	04:30:00	7.5	16.375	1.73333	13.1875	5.8	30.0625	14.5333
Day 10	05:00:00	1.5625	25.3125	1.13333	10.9375	14.6	24.5	35.7333
Day 10	05:30:00	3.3125	26.125	0.866667	11.0625	9	16.6875	32.4667
Day 10	06:00:00	30.25	36.9375	1	10.75	31.8	18.4375	38.2
Day 10	06:30:00	45.625	37.6875	5.33333	25.4375	38	21.5625	44.3333
Day 10	07:00:00	75	52.4375	16.1333	19.6875	31	17.1875	50.9333
Day 10	07:30:00	80.3125	49.625	46.7333	36.125	45	9.25	47.4
Day 10	08:00:00	86.75	52.25	51.5333	45.25	38.6	14.875	46.8667
Day 10	08:30:00	85.125	58.5	52.9333	53.9375	40.8	12.875	43
Day 10	09:00:00	77.5	54.5	59.2	62.4375	36.2	15.625	43.2667
Day 10	09:30:00	80.0625	51.8125	57.7333	60.3125	38.8	12.375	36.2
Day 10	10:00:00	87.4375	53.75	54.2	66.5	41	8.0625	39.6667
Day 10	10:30:00	85.25	48	45.5333	62.1875	34.6	9.375	23.6
Day 10	11:00:00	80.4375	38.8125	39.5333	63.3125	26.8	8.4375	20.8
Day 10	11:30:00	78.6875	34.5625	32	61.4375	25	6.1875	19.8
Day 10	12:00:00	77.875	25.6875	26.8	63.0625	31.2	7.75	18.2
Day 10	12:30:00	42.625	48.4375	17.1333	79.375	32	13.375	14.0667
Day 10	13:00:00	2.0625	5.5625	3.33333	14.9375	4.6	1.6875	5.66667
Day 10	13:30:00	0.4375	2	2.33333	2.25	0	0.125	0.733333
Day 10	14:00:00	1	0.25	0.533333	2.25	1.8	0.125	0
Day 10	14:30:00	0.4375	0.0625	1.26667	1.375	0	1.0625	0
Day 10	15:00:00	0.4375	2.5625	2.46667	4.6875	0	8.125	0
Day 10	15:30:00	3.875	0	1.86667	5.75	0	1.125	0
Day 10	16:00:00	1	0.3125	4.8	0.875	0	2.0625	0.0666667
Day 10	16:30:00	2.25	1.3125	8.06667	2.3125	0	3.125	2.93333
Day 10	17:00:00	1.5625	0.625	6.13333	6.6875	0	19.5	2
Day 10	17:30:00	0.625	0.5	3.33333	0.8125	4.2	8.4375	0.0666667
Day 10	18:00:00	2.0625	3	14.1333	0.9375	0	4.6875	0.266667
Day 10	18:30:00	3.5625	0.3125	4.33333	1.75	0	9.875	4.26667
Day 10	19:00:00	1.9375	0.375	18.8667	0.1875	0	11.5625	3
Day 10	19:30:00	5.25	0.25	17.3333	2.25	0	5.9375	8.93333
Day 10	20:00:00	16.125	0.8125	19.9333	0.6875	3	5.6875	9.33333
Day 10	20:30:00	7.75	1.375	25.6667	5.9375	8.4	0.5625	7.06667
Day 10	21:00:00	6.0625	4.25	24.7333	2.375	16.8	5.0625	6.66667
Day 10	21:30:00	11.9375	3.875	38.7333	4.9375	12.4	3.0625	5
Day 10	22:00:00	14.5625	7.625	15.5333	9.4375	21	3.8125	5.13333
Day 10	22:30:00	20.4375	9.5	12.8667	6.9375	12.6	1.9375	4.73333
Day 10	23:00:00	24.8125	5.8125	17.6667	13.1875	20.8	6.8125	6.66667
Day 10	23:30:00	14.375	5.25	16.2	13.0625	17.2	5.5625	5.93333

## Sheet: Fig 5 D E Quantification
	Evening peak phase relative to w1118
Genotype	Experiment 1	Experiment 2	Experiment 3		AVERAGE	SEM
Figure 5D
TG4/+; UAS-Dcr2/+	0.625	0.125	0.125		0.291667	0.166667
PsiRNAiKK/+	2	0.875	1		1.29167	0.356
TG4/PsiRNAiKK; UAS-Dcr2/+	4.375	3.125	4.75		4.08333	0.491243
Figure 5E
tim0,TG4/tim0; UAS-Dcr2/timHA	-0.625	0.125	-1.375		-0.625	0.433013
tim0,PsiRNAi/tim0; timHA/+	-1	0.25	0.75		0	0.520416
tim0,TG4/tim0,PsiRNAiKK; UAS-Dcr2/timHA	0.375	1.5	0.5		0.791667	0.356
