# Supplementary material for: Drosophila PSI controls circadian period and the phase of circadian behavior under temperature cycle via tim splicing
Source: eLife journal article supplement (doi:10.7554/elife.50063), 2019-11-08
Supplement: supp [file elife-50063-supp-v1.zip › elife_poa_e50063_Figure_5_source_data_2.xlsx]

## Sheet: Figure 5
Figure 5B
Unpaired t test
P value	<0.0001
P value summary	****
Mean ± SEM, n (rhythmic flies) of TG4/+; UAS-Dcr2/+	24.92 ± 0.04676, n=33
Mean ± SEM, n (rhythmic flies) of TG4/PsiRNAiKK; UAS-Dcr2/+	23.44 ± 0.04837, n=43
Difference between means	-1.474 ± 0.06877
95% confidence interval	-1.611 to -1.337
Figure 5C
Unpaired t test
P value	0.1531
P value summary	ns
Mean ± SEM, n (rhythmic flies) of tim0,TG4/tim0; UAS-Dcr2/timHA	24.93 ± 0.07756, n=21
Mean ± SEM, n (rhythmic flies) of tim0,TG4/tim0,PsiRNAiKK; UAS-Dcr2/timHA	24.79 ± 0.06481, n=30
Difference between means	-0.1467 ± 0.1011
95% confidence interval	-0.3497 to 0.05641
Figure 5D
	TG4/+; UAS-Dcr2/+	PsiRNAiKK/+	TG4/PsiRNAiKK; UAS-Dcr2/+
Mean	0.2917	1.292	4.083
SEM	0.1667	0.356	0.4912
Number of runs	3	3	3
One-way ANOVA followed by:
Tukey's multiple comparisons test	Mean Diff.	95.00% CI of diff.	Significant?	Summary	Adjusted P Value
TG4/+; UAS-Dcr2/+ vs. PsiRNAiKK/+	-1	-2.576 to 0.5762	No	ns	0.2064
TG4/+; UAS-Dcr2/+ vs. TG4/PsiRNAiKK; UAS-Dcr2/+	-3.792	-5.368 to -2.215	Yes	***	0.0008
PsiRNAiKK/+ vs. TG4/PsiRNAiKK; UAS-Dcr2/+	-2.792	-4.368 to -1.215	Yes	**	0.0039
Figure 5E
	tim0,PsiRNAiKK/tim0; timHA/+	tim0,TG4/tim0; UAS-Dcr2/timHA	tim0,TG4/tim0,PsiRNAiKK; UAS-Dcr2/timHA
Mean	0	-0.625	0.7917
Std. Error of Mean	0.5204	0.433	0.356
Number of values	3	3	3
One-way ANOVA followed by:
Tukey's multiple comparisons test	Mean Diff.	95.00% CI of diff.	Significant?	Summary	Adjusted P Value
tim0,PsiRNAiKK/tim0; timHA/+ vs. tim0,TG4/tim0; UAS-Dcr2/timHA	0.625	-1.291 to 2.541	No	ns	0.6031
tim0,PsiRNAiKK/tim0; timHA/+ vs. tim0,TG4/tim0,PsiRNAiKK; UAS-Dcr2/timHA	-0.7917	-2.708 to 1.125	No	ns	0.4612
tim0,TG4/tim0; UAS-Dcr2/timHA vs. tim0,TG4/tim0,PsiRNAiKK; UAS-Dcr2/timHA	-1.417	-3.333 to 0.4996	No	ns	0.1372
