# Supplementary figures and images for: Drosophila PSI controls circadian period and the phase of circadian behavior under temperature cycle via tim splicing
Source: eLife journal article supplement (doi:10.7554/elife.50063), 2019-11-08

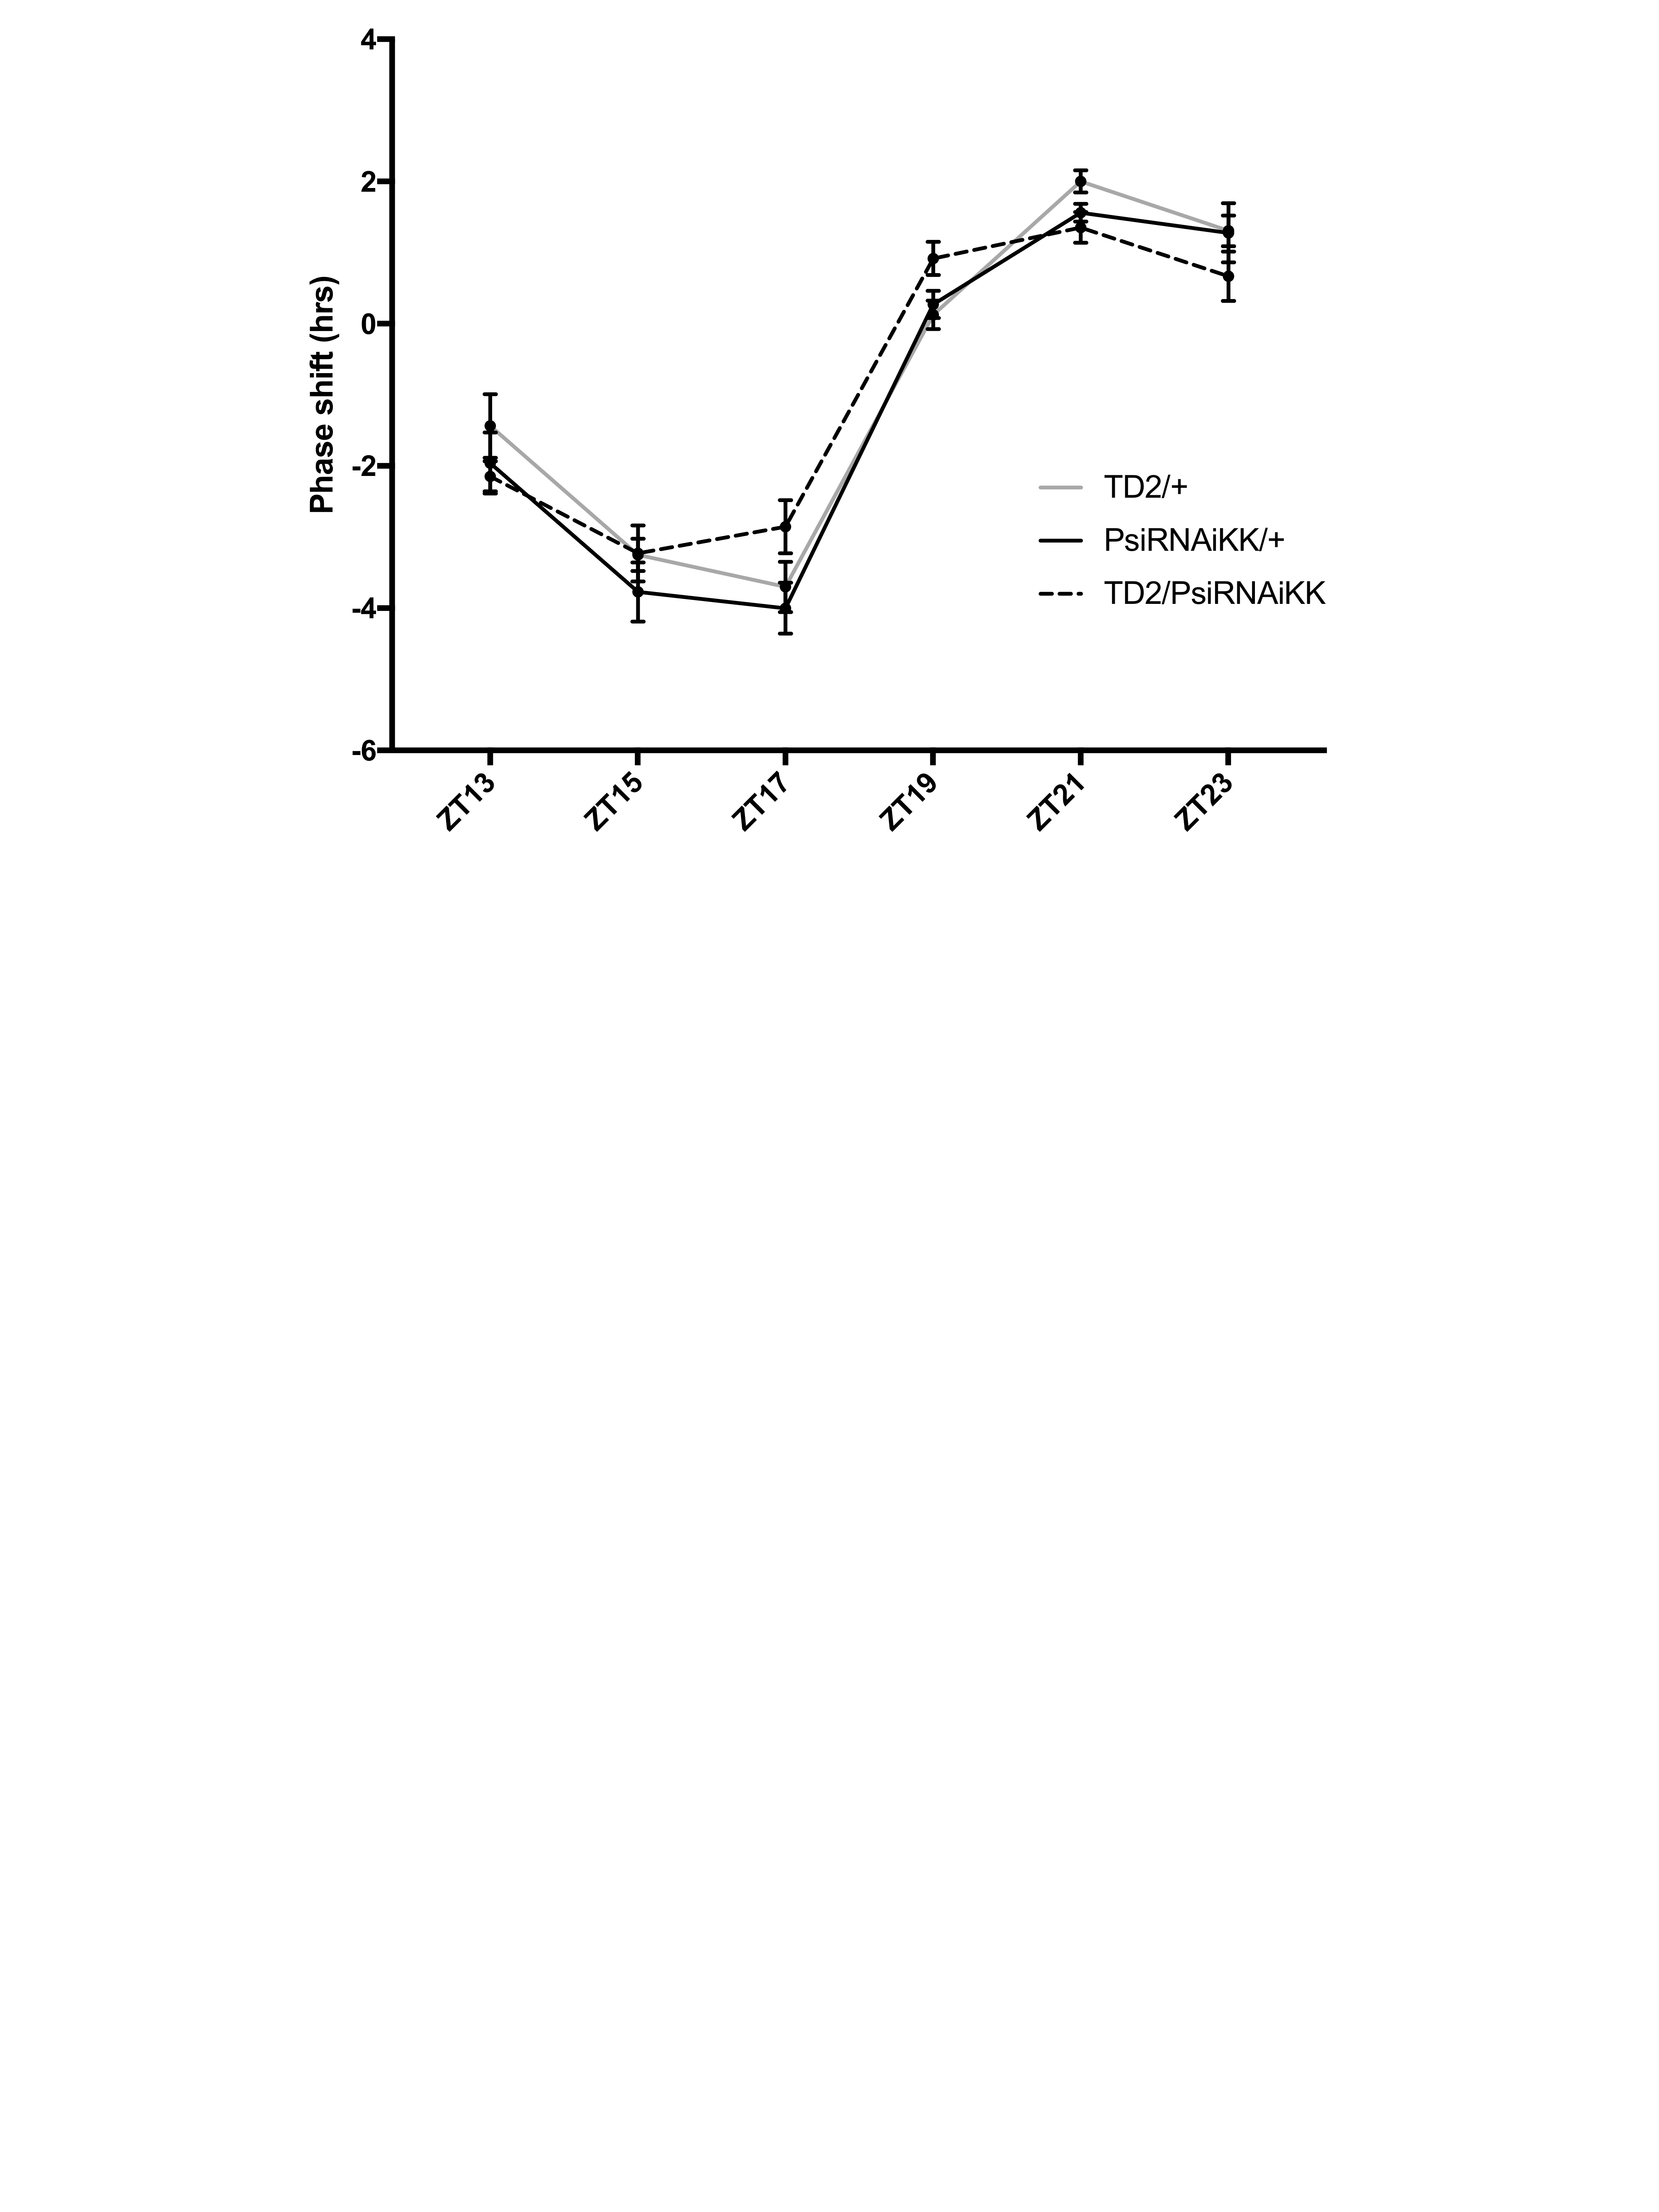

Supplement: supp [file elife-50063-supp-v1.zip › elife_poa_e50063_Figure_3_figure_supplement_3.jpg]

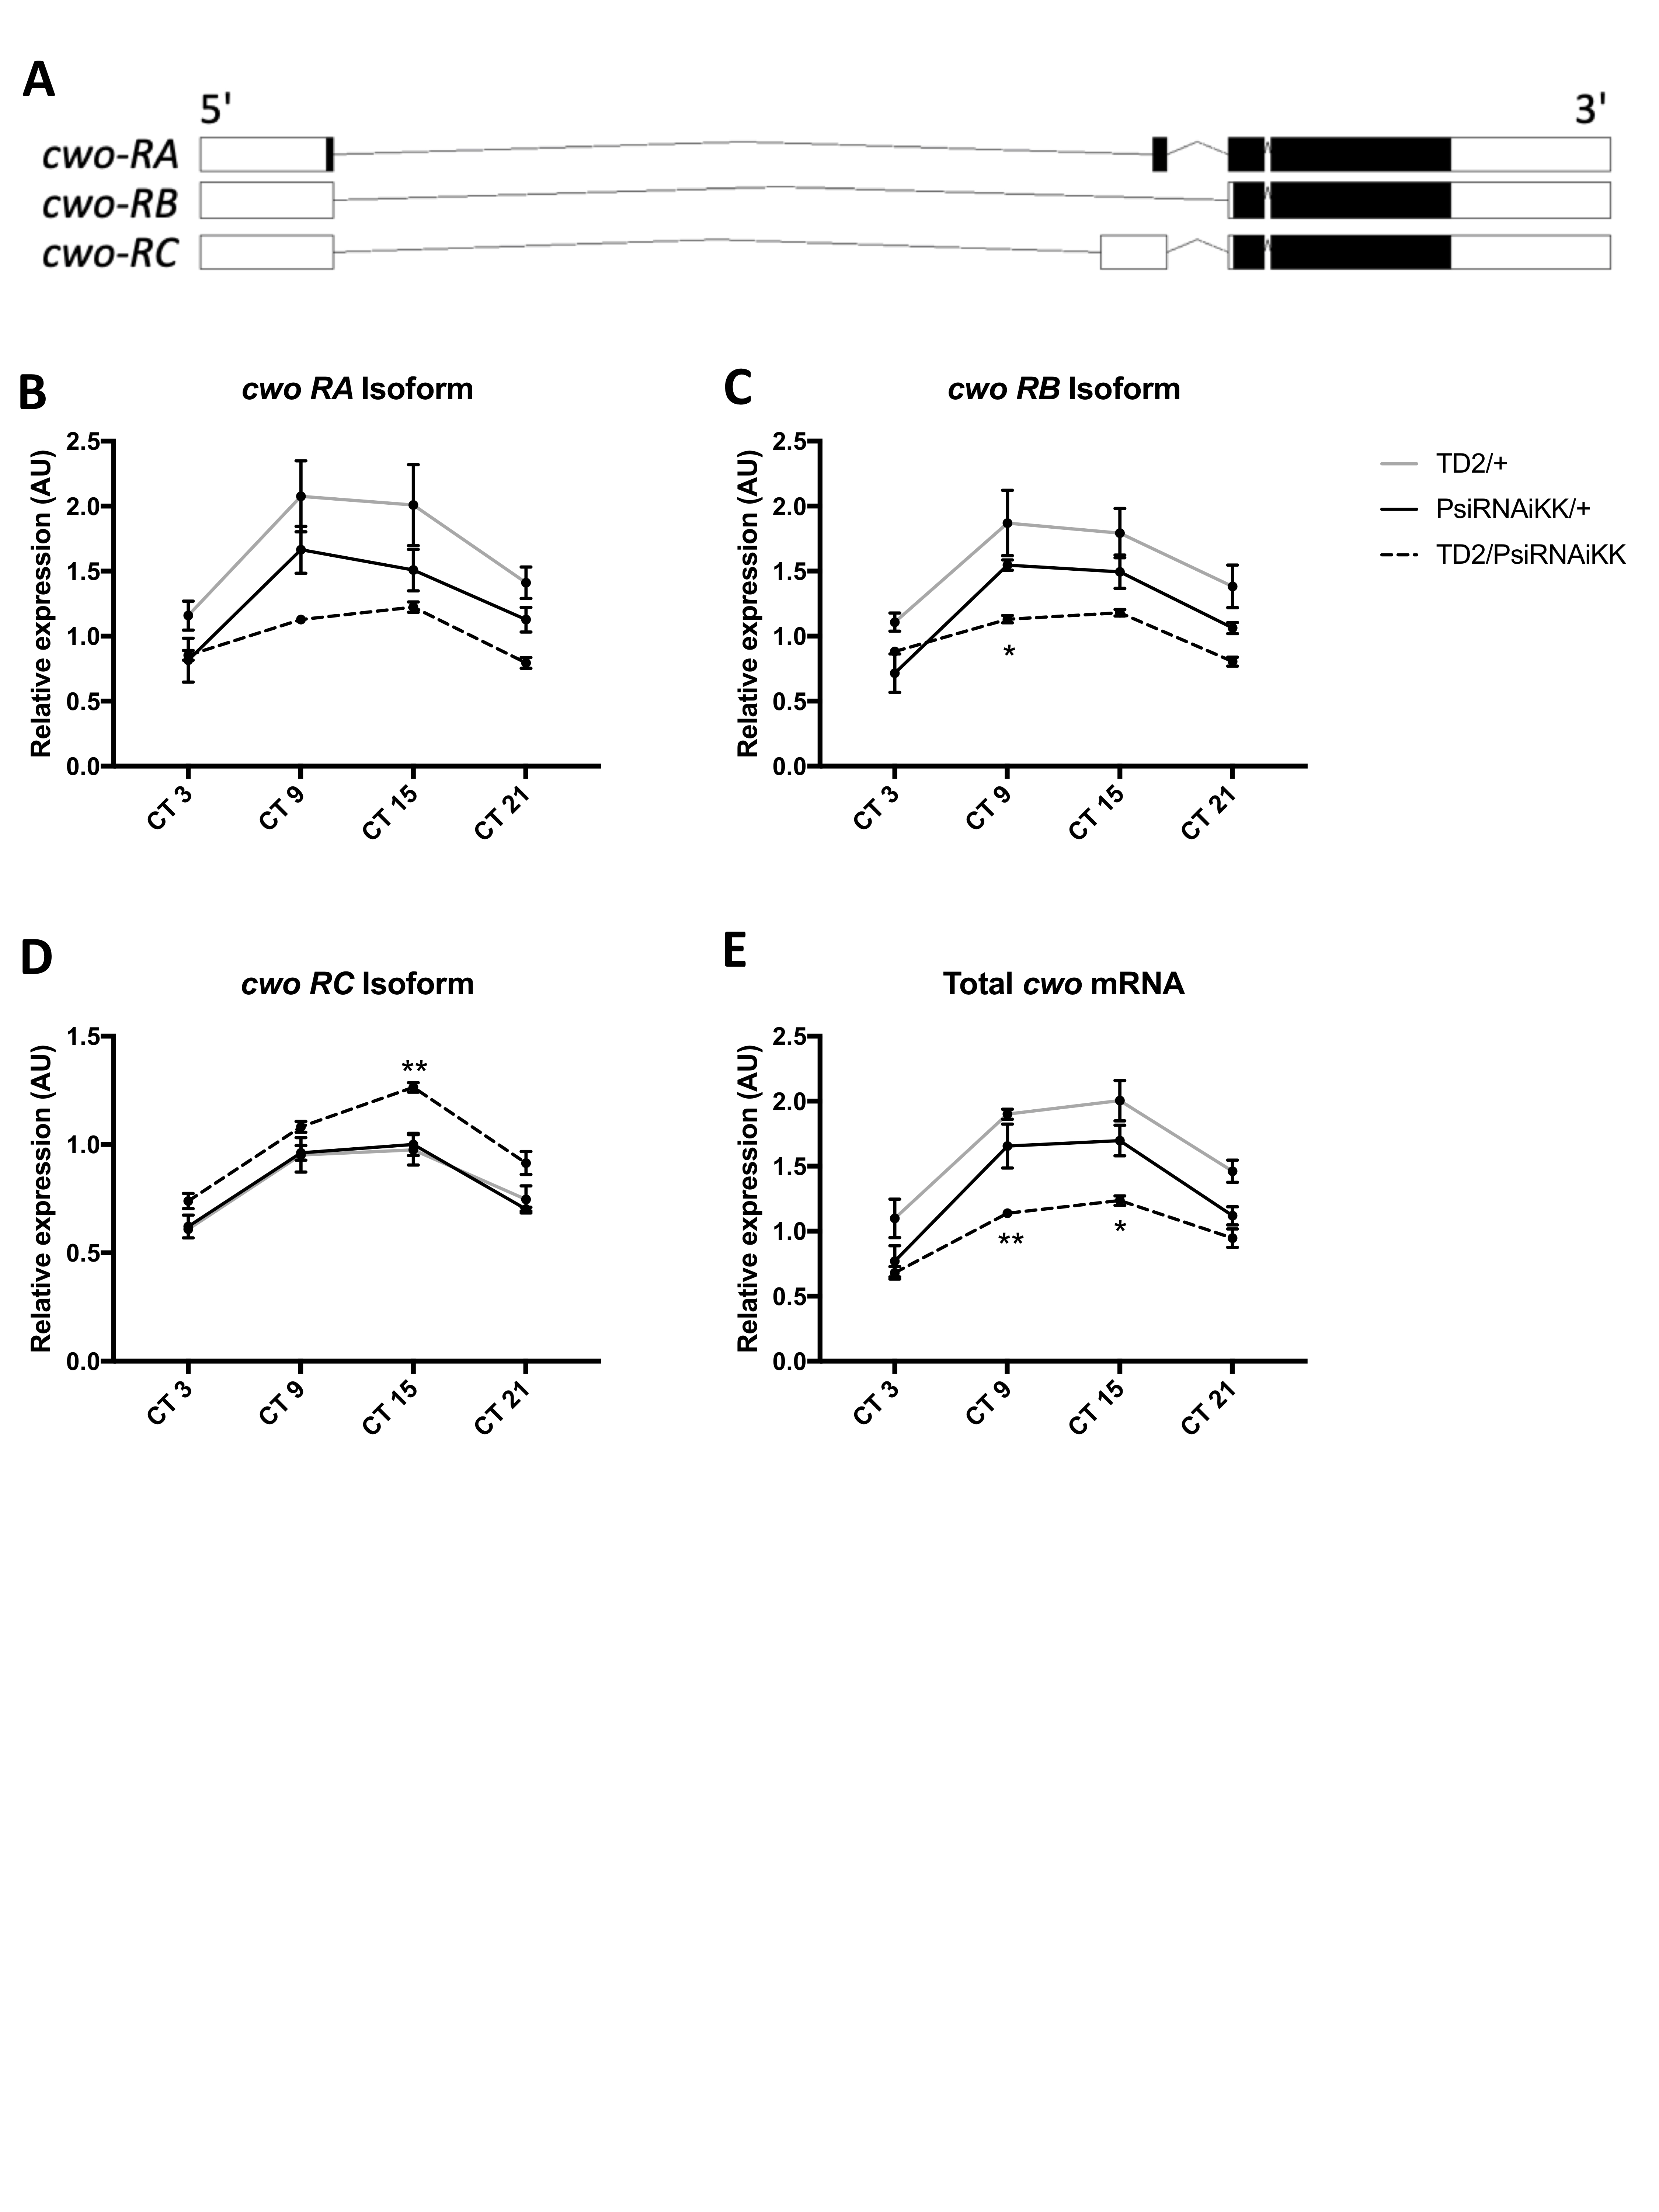

Supplement: supp [file elife-50063-supp-v1.zip › elife_poa_e50063_Figure_3_figure_supplement_1.jpg]

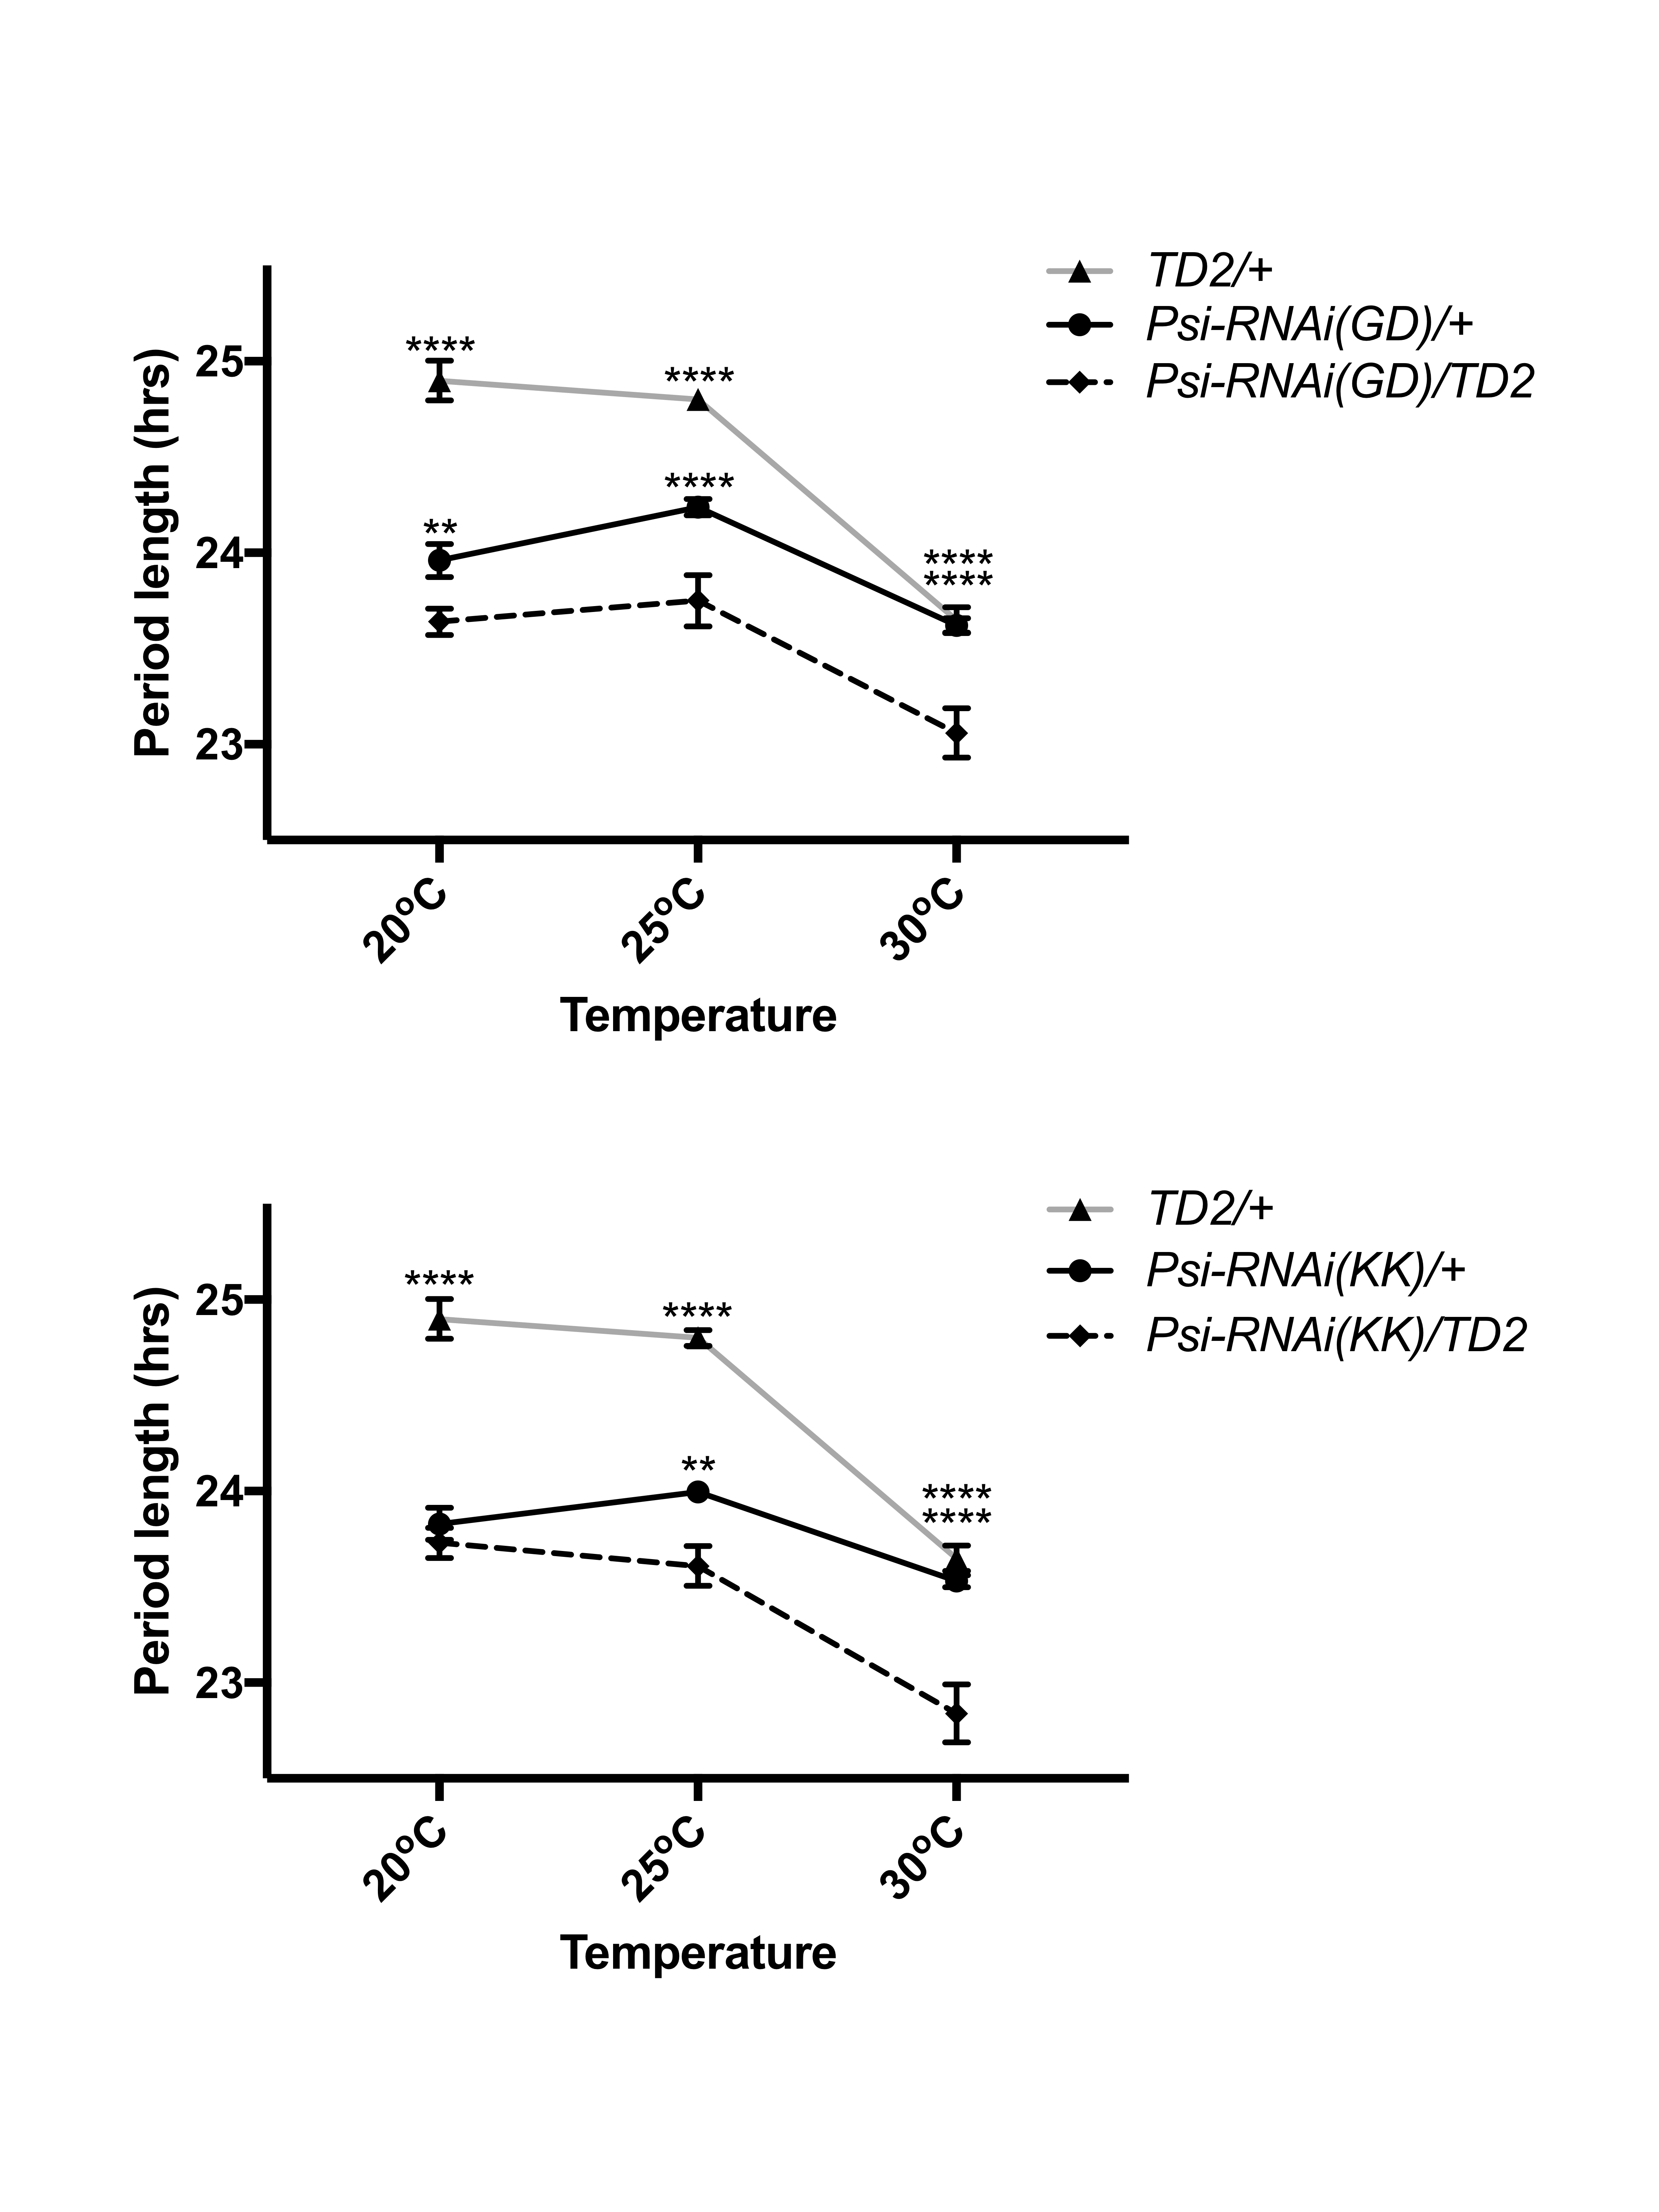

Supplement: supp [file elife-50063-supp-v1.zip › elife_poa_e50063_Figure_4_figure_supplement_1.jpg]

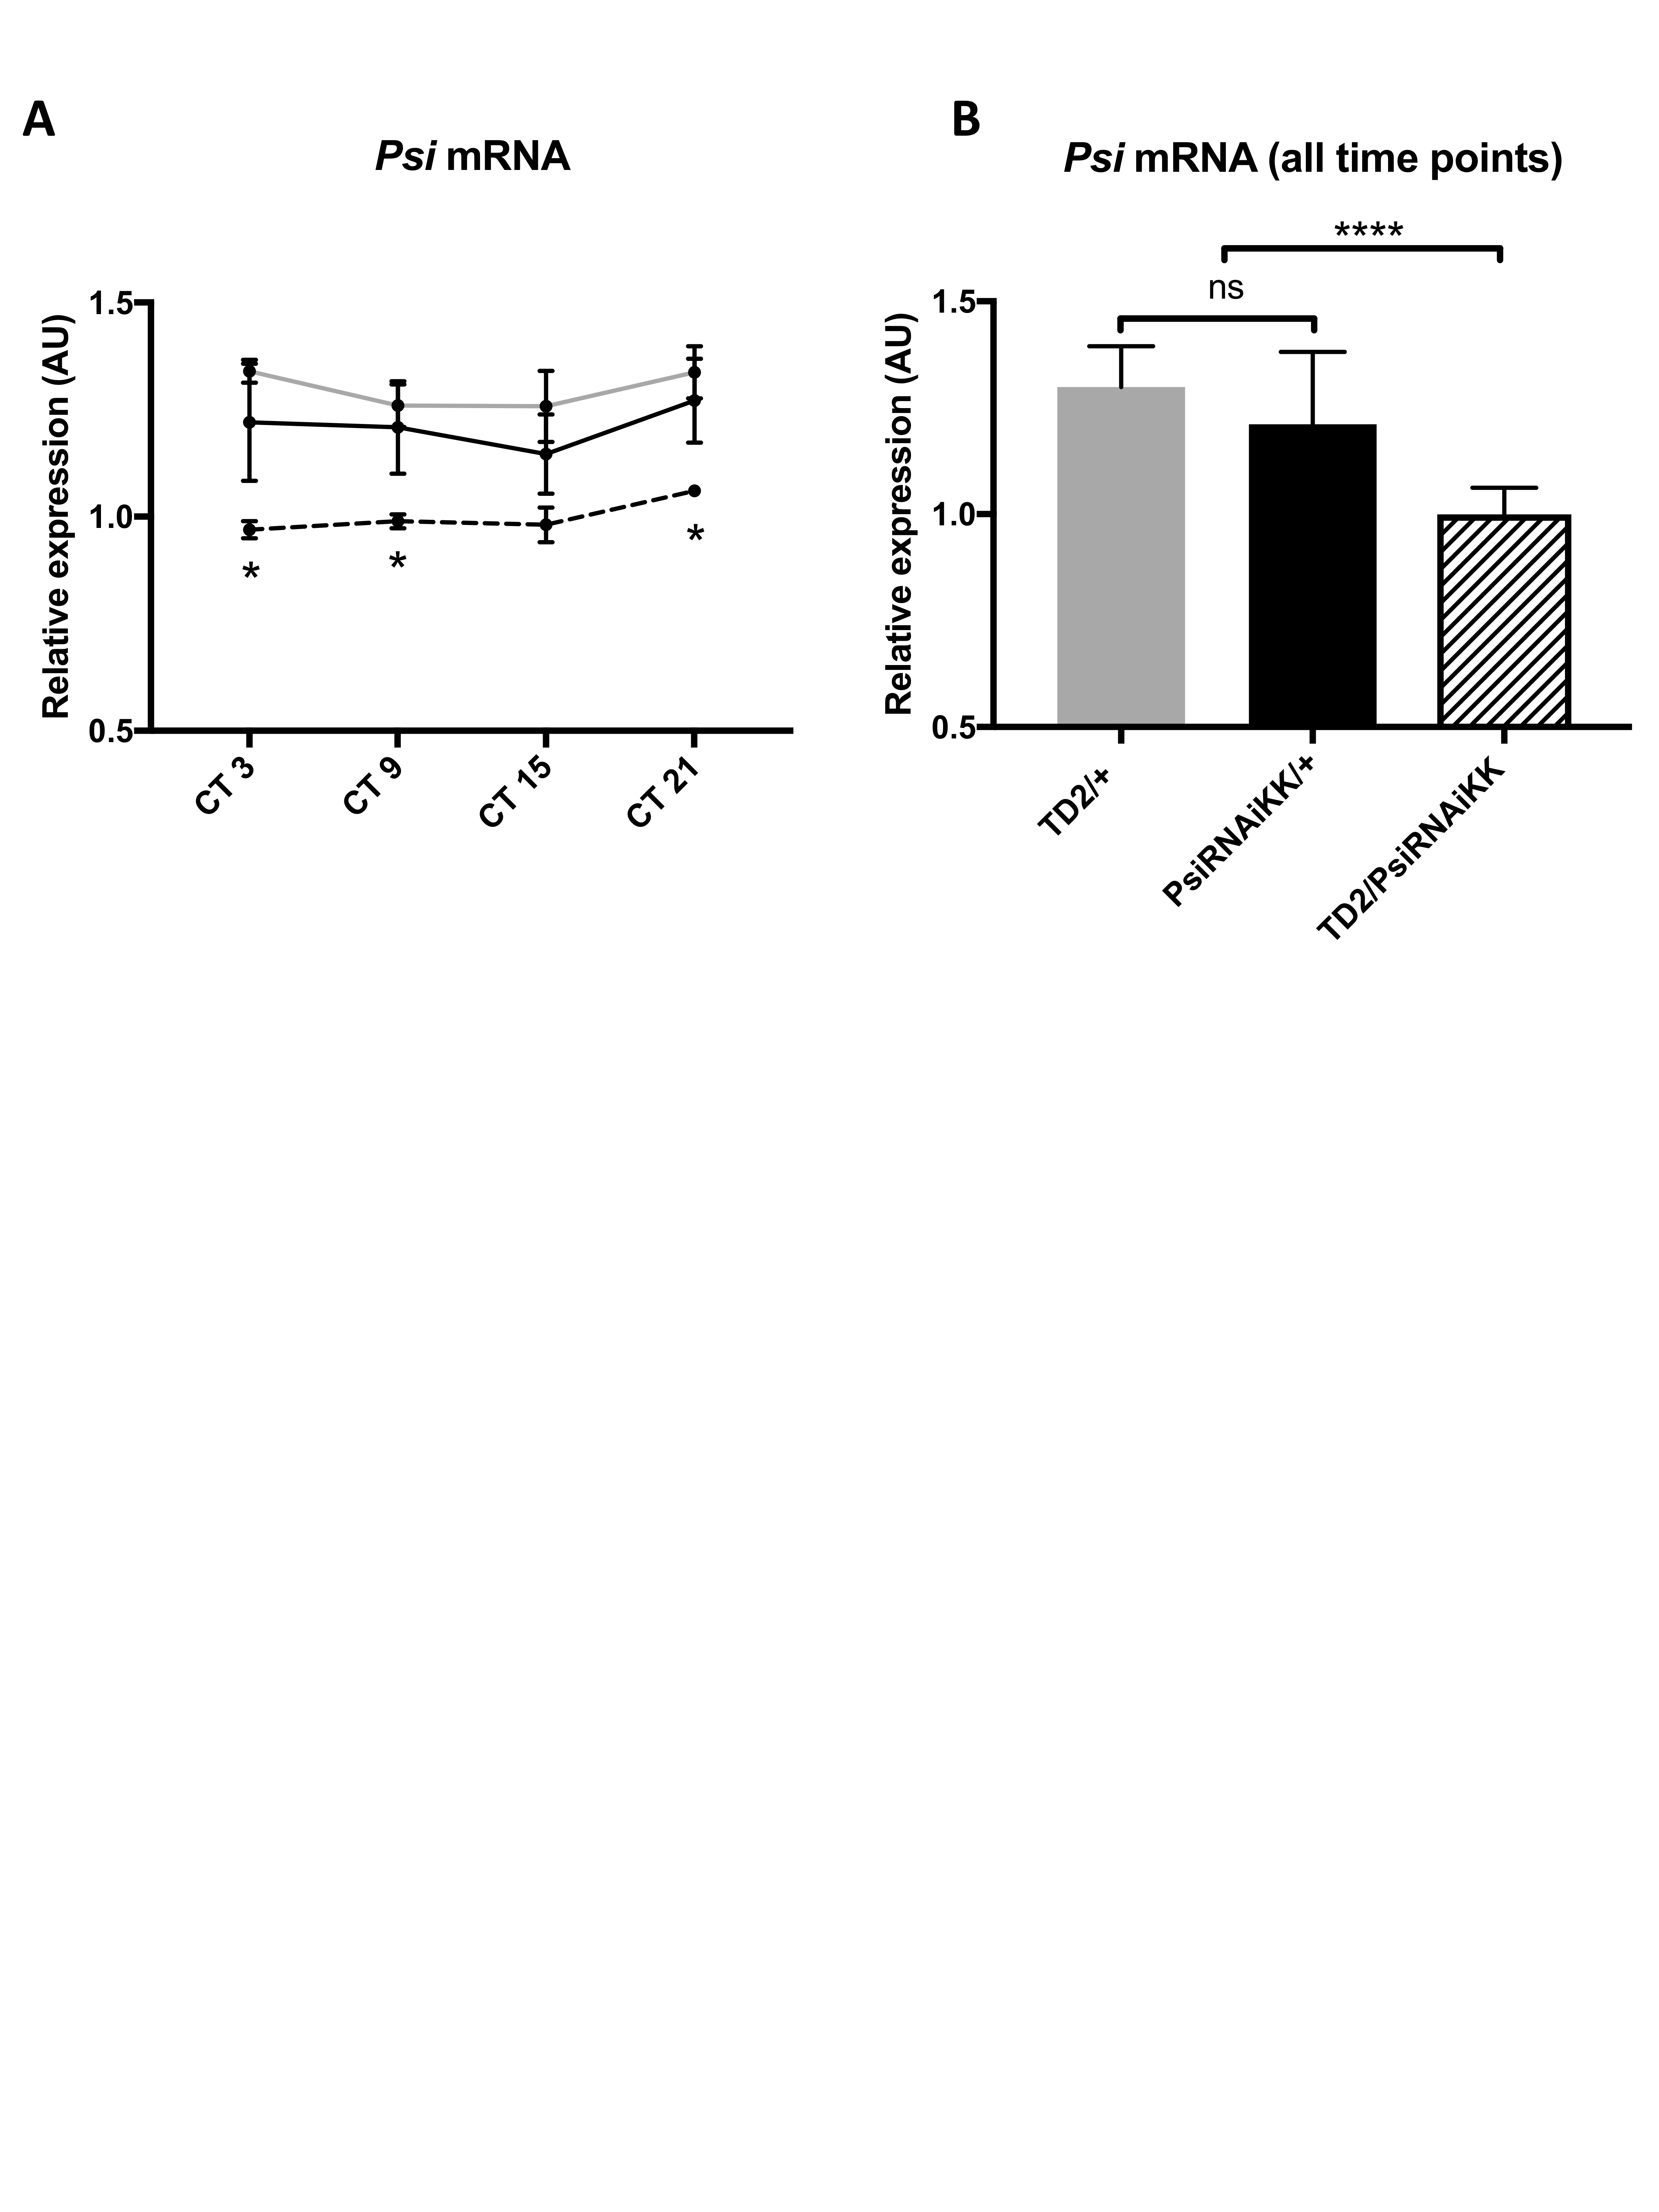

Supplement: supp [file elife-50063-supp-v1.zip › elife_poa_e50063_Figure_2_figure_supplement_1.jpg]

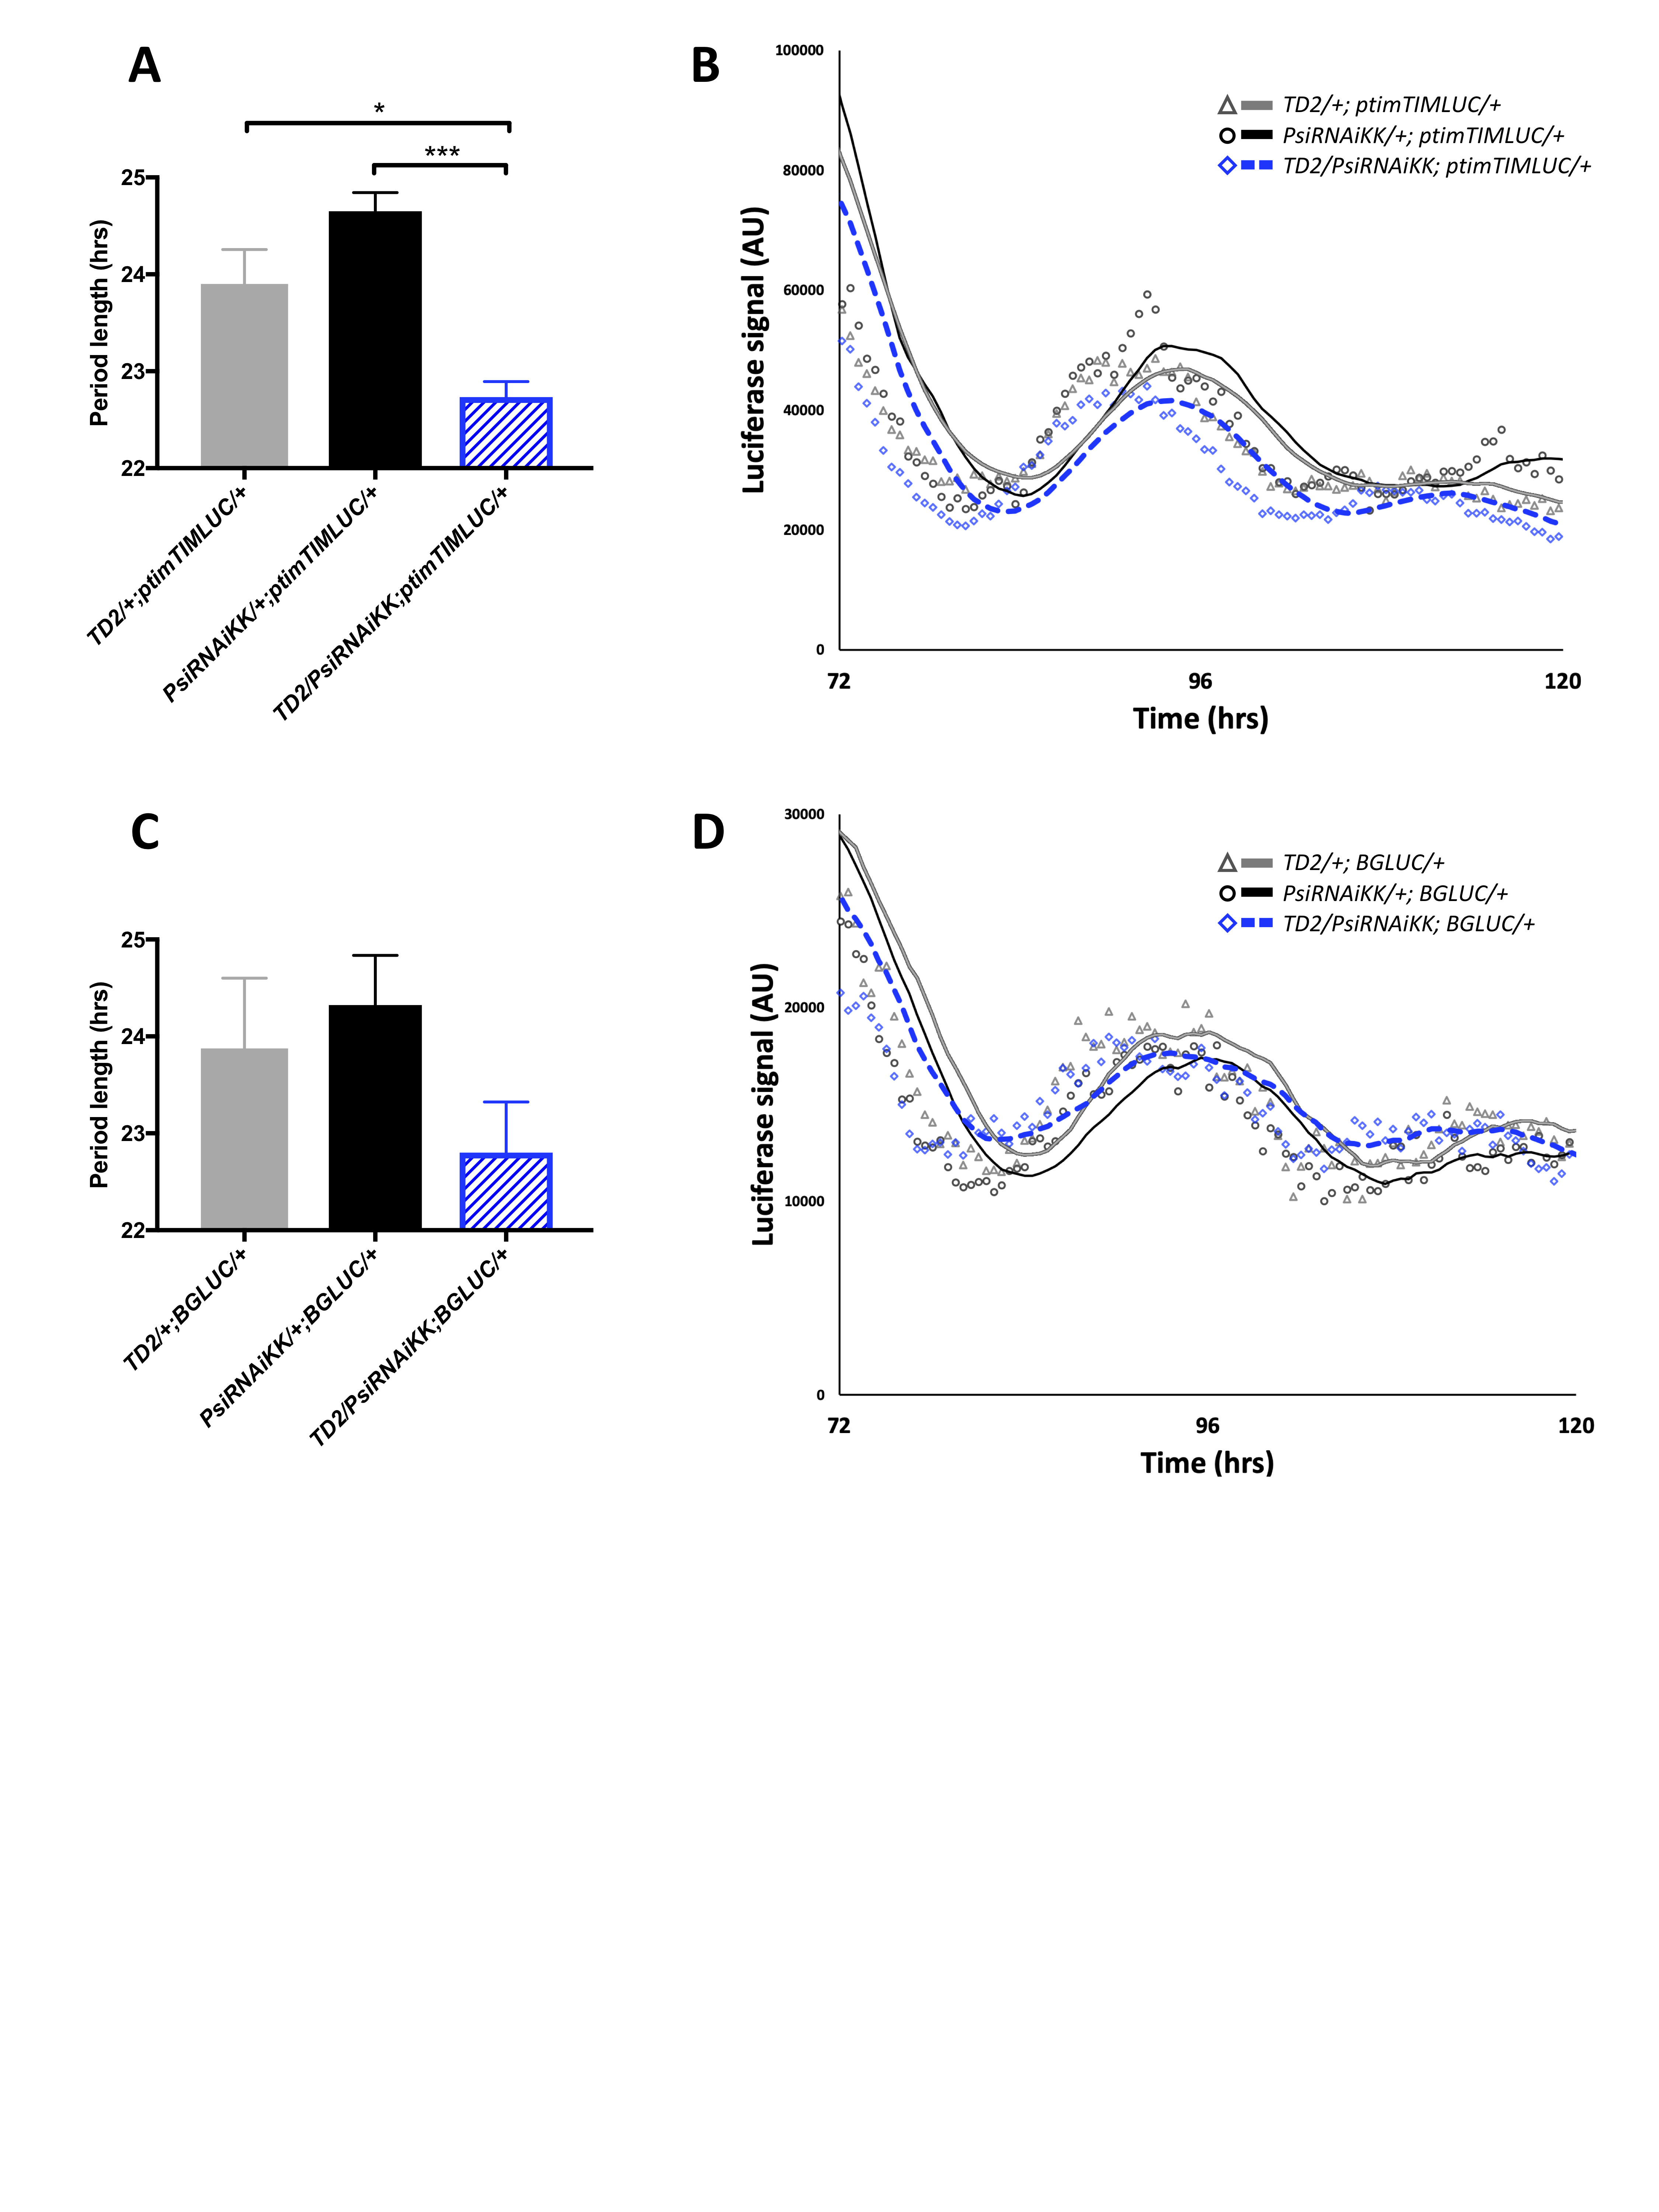

Supplement: supp [file elife-50063-supp-v1.zip › elife_poa_e50063_Figure_2_figure_supplement_2.jpg]

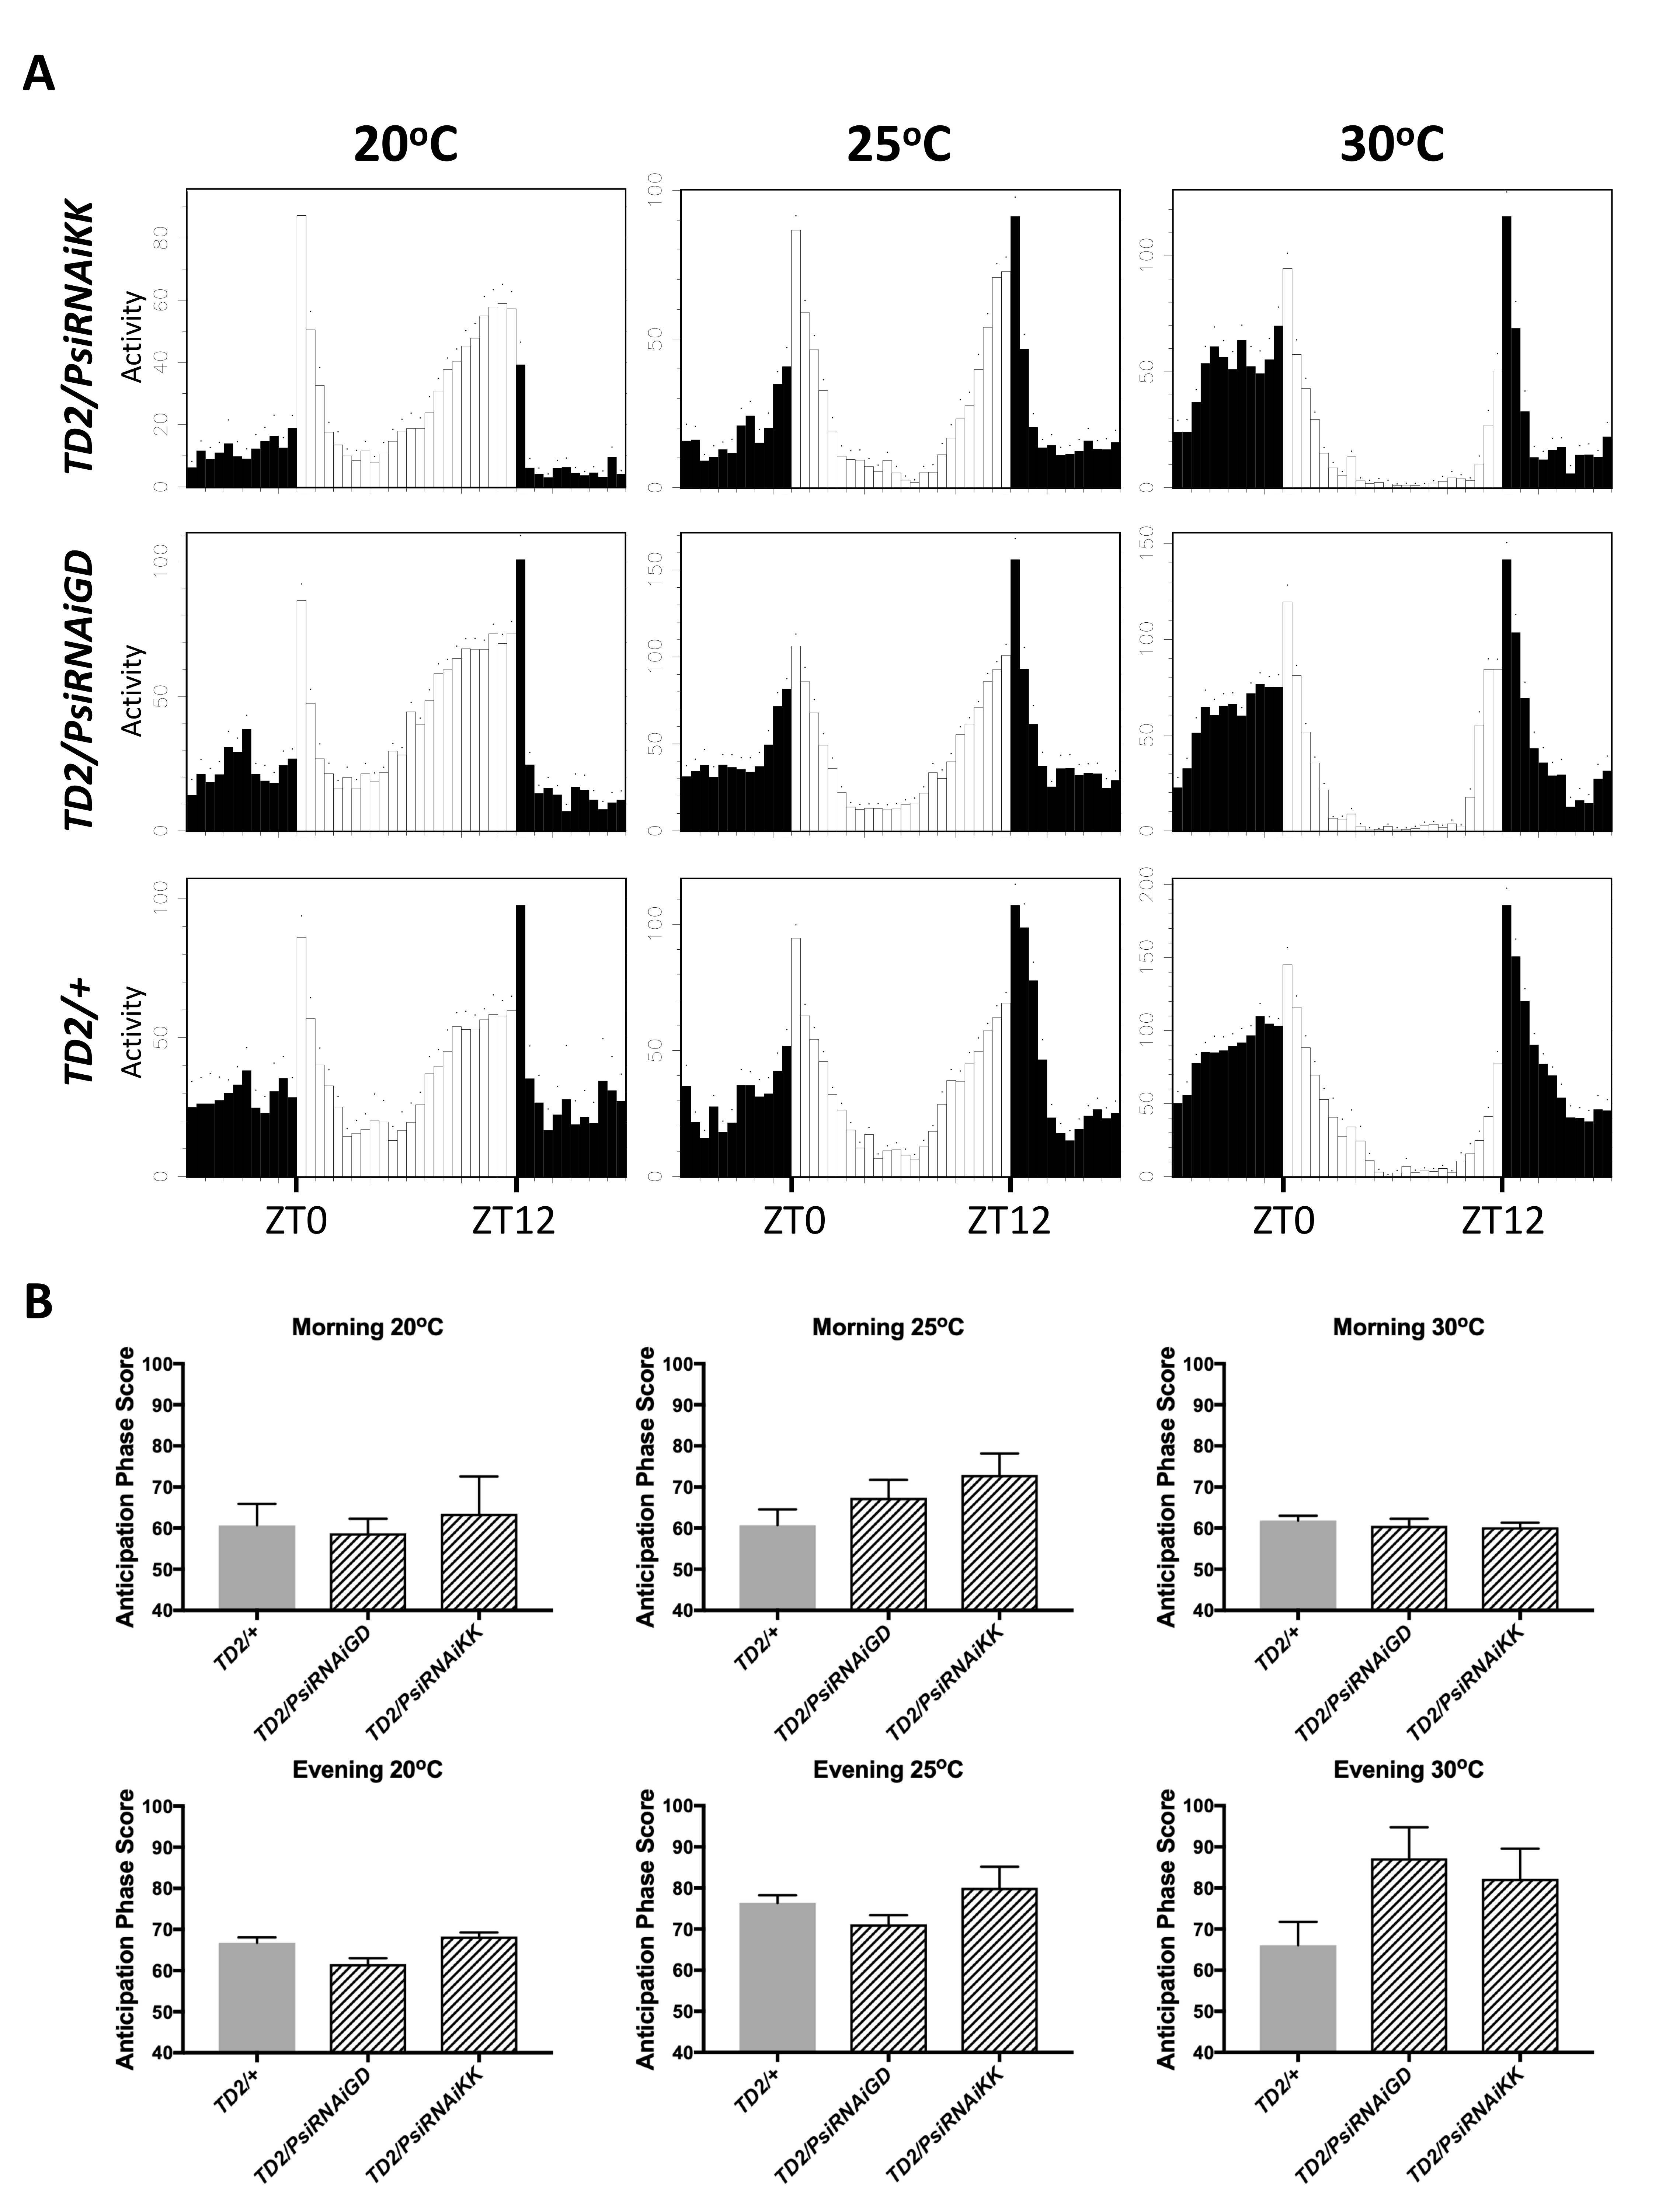

Supplement: supp [file elife-50063-supp-v1.zip › elife_poa_e50063_Figure_3_figure_supplement_2.jpg]
